# Supplementary material for: What are the essential features of a successful surgical registry? a systematic review
Source: PubMed Central journal article supplement — BMJ Open. 2017 Sep 24;7(9):e017373. doi: 10.1136/bmjopen-2017-017373 (PMC5623553; doi:10.1136/bmjopen-2017-017373), 2017-09-24
Supplement: bmjopen-2017-017373.draft_revisions.pdf [file bmjopen-2017-017373.draft_revisions.pdf]

# BMJ Open

BMJ Open is committed to open peer review. As part of this commitment we make the peer review history of every article we publish publicly available.

When an article is published we post the peer reviewers' comments and the authors' responses online. We also post the versions of the paper that were used during peer review. These are the versions that the peer review comments apply to.

The versions of the paper that follow are the versions that were submitted during the peer review process. They are not the versions of record or the final published versions. They should not be cited or distributed as the published version of this manuscript.

BMJ Open is an open access journal and the full, final, typeset and author-corrected version of record of the manuscript is available on our site with no access controls, subscription charges or pay-per-view fees (<http://bmjopen.bmj.com>).

If you have any questions on BMJ Open's open peer review process please email [editorial.bmjopen@bmj.com](mailto:editorial.bmjopen@bmj.com)

# BMJ Open

## The fundamentals for surgical registry development: a systematic review

|                                 |                                                                                                                                                                                                                                                                                                                                                                                     |
|---------------------------------|-------------------------------------------------------------------------------------------------------------------------------------------------------------------------------------------------------------------------------------------------------------------------------------------------------------------------------------------------------------------------------------|
| Journal:                        | <i>BMJ Open</i>                                                                                                                                                                                                                                                                                                                                                                     |
| Manuscript ID                   | bmjopen-2017-017373                                                                                                                                                                                                                                                                                                                                                                 |
| Article Type:                   | Research                                                                                                                                                                                                                                                                                                                                                                            |
| Date Submitted by the Author:   | 22-Apr-2017                                                                                                                                                                                                                                                                                                                                                                         |
| Complete List of Authors:       | Mandavia, Rishi; University College London Ear Institute, Knight, Alec; King's College London, Department of Primary Care and Public Health Sciences<br>Phillips, John<br>Mossialos, Elias; Imperial College London, Institute of Global Health Innovation<br>Littlejohns, Peter; Kings College London, Primary care and public health<br>Schilder, Anne; University college London |
| <b>Primary Subject Heading</b>: | Surgery                                                                                                                                                                                                                                                                                                                                                                             |
| Secondary Subject Heading:      | Health informatics, Research methods, Evidence based practice, Surgery, Health services research                                                                                                                                                                                                                                                                                    |
| Keywords:                       | Registry, Otolaryngology < SURGERY, Health informatics < BIOTECHNOLOGY & BIOINFORMATICS, SURGERY                                                                                                                                                                                                                                                                                    |
|                                 |                                                                                                                                                                                                                                                                                                                                                                                     |

SCHOLARONE™  
Manuscripts

only

**The fundamentals for surgical registry development: a systematic review**

Mr Rishi Mandavia (RM) (1)

Dr Alec Knight (AK) (2)

Mr John Phillips (JP) (3)

Professor Elias Mossialos (EM) (4)

Professor Peter Littlejohns (PL) (2)

Professor Anne Schilder (AS) (1)

(1) evidENT team, UCL Ear Institute, Royal National Throat, Nose and Ear Hospital, 330 Grays Inn Road, London WC1X 8DA, UK

(2) Department of Primary Care and Public Health Sciences, King's College London, Addison House, London, SE1 IUL, UK

(3) Department of Ear Nose and Throat Surgery, Norfolk and Norwich University Hospital, Norwich, NR4 7UY, UK

(4) Centre for Health Policy, Imperial College London, St Mary's Hospital, South Wharf Road, London W2 JNY

**Corresponding author**

Mr Rishi Mandavia

Academic Clinical Fellow ENT, NICE Scholar

evidENT Team,

Ear Institute,

University College London

Royal National Throat, Nose and Ear Hospital

330 Grays Inn Road

London, WC1X 8DA

[rishimandavia@gmail.com](mailto:rishimandavia@gmail.com)

+44 (0) 20 3108 9327

## ABSTRACT

### Objective

The regulation of surgical implants is vital to patient safety and there is an international drive to establish registries for all implants. Hearing loss is an area of unmet need and industry is targeting this field with a growing range of surgically-implanted hearing devices. Currently, there is no comprehensive UK-registry capturing data on these devices; in its absence, it is difficult to monitor safety, practices and effectiveness. Recognising that developing a surgical registry faces challenges, we set out to identify the fundamentals for this process from previous and existing UK-surgical registries. This approach provides information for any surgical specialty wishing to develop a registry.

### Methods

Systematic literature review and narrative synthesis adhering to PRISMA recommendations. Inclusion criteria were: publications describing the design, development, critical analysis or current-status of a national surgical registry. We used a data extraction table developed by thematic analysis and synthesised data into a structured narrative.

### Results

Sixty-nine publications were included. The fundamentals to successful registry development include: steering committee to lead and oversee the registry; clear registry objectives; planning for initial and long-term funding; strategic national collaborations amongst key stakeholders; dedicated registry management team; consensus meetings to agree registry dataset; established data processing systems; anticipating challenges; implementing strategies to increase data completion. Patient involvement and awareness of legal factors should occur throughout the development process.

### Conclusions

This systematic review provides robust knowledge that can be used to inform the successful development of any UK-surgical registry. It also provides a methodological framework for international surgical registry development.

## Registration

PROSPERO database registration number: CRD42016039793.

## Strengths and limitations of this study

- This review provides a systematic and evidence based foundation for the development of any surgical registry.
- We adopted a rigorous approach searching both the scientific and grey literature and used thematic analysis to develop our data extraction table.
- Data analyses at all stages were cross checked by a second judge and discussed at consensus meetings.
- We did not perform quality assessment of the publications included in this review, owing to the non-empirical nature of included publications and the considerable heterogeneity amongst types of included publications.
- By excluding non-surgical registries, we may have failed to capture important information on registry development. Our decision was based on surgical registries having specific attributes that we wanted to learn from including: datasets, strategies to increase surgeon 'buy in', funding sources, key challenges and others.

## INTRODUCTION:

The effective regulation of surgical implants is vital to patient safety. The Poly Implant Prothese (PIP) breast implant and metal-on-metal hip implant scandals have identified the risks of not gathering long term data on implants and outcomes systematically.<sup>1,2</sup> As such, there is a UK and European-wide drive to establish registries for all surgical implants.<sup>3</sup> In the UK there are a number of well-known surgical registry initiatives including: the National Joint Registry (NJR), the National Hip Fracture Database (NHFD), the National Bariatric Surgery Registry (NBSR) and others. There are currently few registry initiatives in ENT Surgery, particularly within the field of hearing.

Hearing loss is an area of unmet need<sup>4,5,6,7</sup> and industry is targeting this field with a growing range of surgically-implanted hearing devices.<sup>8,9,10,11</sup> Currently, there is no comprehensive

1  
2  
3 UK-registry capturing data on these devices,<sup>10,12</sup> in its absence, it is difficult to monitor  
4 safety, practices and effectiveness.<sup>5,13</sup> A solution to this is developing a national registry of  
5 all auditory implants. Recognising that developing and maintaining a registry faces  
6 challenges, it is important to learn from the experiences of previous and existing  
7 registries.<sup>14,15</sup> We therefore reviewed the literature on UK-surgical registries to identify the  
8 fundamentals for this process. This approach provides relevant information for any surgical  
9 specialty wishing to develop a registry.  
10  
11  
12  
13  
14

## 15 16 17 **MATERIALS AND METHODS**

### 18 19 20 **Registration**

21  
22 This systematic review was registered on the PROSPERO database. Registration number:  
23 CRD42016039793.  
24  
25  
26

### 27 28 **Design**

29 Systematic Review and Narrative Synthesis.  
30  
31  
32

### 33 34 **Search strategy and selection criteria**

35 A systematic review was performed adhering to PRISMA recommendations.<sup>16</sup> With expert  
36 librarian support we designed and conducted a comprehensive search of the Medline and  
37 Embase databases from inception to July 2015 using the Ovid portal. An updated search was  
38 performed in November 2016. The search string used was ((surgery or surgical) AND  
39 (register or registers or registry or registries)) AND (britain\$ or "united kingdom\$" or uk or  
40 england\$ or northern ireland\$ or wales\$ or scotland\$). All registry names identified in the  
41 screening process were noted and searched in the grey literature. Available national registry  
42 reports were reviewed from registry websites. We also visually scanned reference lists and  
43 searched relevant citations in the grey literature. Two authors (R.M and J.P) searched the  
44 literature independently and compared results at each stage of the PRISMA flowchart  
45 (Figure 1). A third author (A.S) arbitrated disagreements.  
46  
47  
48  
49  
50  
51  
52  
53  
54

55  
56 Criteria for publications to be included were: publications describing the design,  
57 development, critical analysis or current-status of a national surgical registry. Exclusion  
58  
59  
60

1  
2  
3 criteria were: non-English language; publications over ten years old; and publications  
4 describing non-surgical or non UK-registries.  
5  
6  
7

### 8 **Data extraction and synthesis**

9  
10 A data extraction table was produced in Microsoft Excel; column headings were developed  
11 by the first author (R.M), following immersion in the dataset and using thematic analysis to  
12 identify the key themes for data extraction. R.M extracted the data, allocating information  
13 from included publications into relevant columns. A second author (J.P) cross-checked the  
14 development of the data extraction table and the data extraction and this process was  
15 discussed at two interim consensus meetings. Data were then synthesised by summarising  
16 the data under each data extraction column into a structured narrative, following the  
17 principles outlined by Popay et al.<sup>17</sup>  
18  
19  
20  
21  
22  
23  
24  
25

## 26 **RESULTS**

27  
28  
29 After duplicates were removed, titles and abstracts of 1389 publications were screened.  
30 Thirty-five additional records were identified from other sources. Fifty-nine publications  
31 fulfilled the criteria for analysis. After conducting our updated search, ten additional  
32 publications were included, resulting in 69 publications for analysis. See Figure 1 for the  
33 PRISMA flowchart.  
34  
35  
36  
37  
38  
39

40 Included publications consisted of annual registry reports and analyses, registry overview  
41 documents, editorials, commentaries, registry proposal documents and registry review  
42 articles and covered a range of surgical specialities (see Table 1).  
43  
44  
45  
46

47 Following thematic analysis, 20 data extraction column headings were developed (see Table  
48 2), into which information from the 69 included publications were allocated. Table 3  
49 specifies which publications contributed to each of the data extraction columns. Appendix 1  
50 shows the full data extraction table.  
51  
52  
53  
54

55  
56 The numerical and alphabetical digits below correspond to the data extraction columns in  
57 Appendix 1.  
58  
59  
60

## Registry planning

### *Registry leadership and management (1.G)*

Registries are typically led by steering committees comprising professional and clinical stakeholders as well as patient representatives<sup>18-22</sup> Steering committees should have overall responsibility for registry design, data monitoring, data analysis<sup>23</sup> as well as strategic direction, oversight, and allocation of registry resources.<sup>19,21,24,25</sup>

It is important for registry management to receive input from both clinical and data management experts.<sup>26,27</sup> Local registry managers help maximise data completion and accuracy;<sup>21</sup> and private companies have been employed to successfully to manage several UK-national registries.<sup>25,28-30</sup>

### *The objective(s) of a surgical registry (1.H)*

Registries should have a clear set of objectives from the outset; these often include: improving patient care, providing comparisons of standards, monitoring current practice, monitoring device durability and intervention performance, identifying variations in service provisioning as well as guiding commissioning and guideline development.<sup>12,19,20,22,30-32</sup>

Other aims include gaining a better understanding of disease epidemiology<sup>19,21,33</sup> and promoting future research, innovation, efficiency, transparency and patient decision making.<sup>28,34-38</sup>

### *Funding (1.I)*

Registries require considerable resources for initial set-up and ongoing maintenance.<sup>26</sup> Owing to implant lifespan, implant registries in particular should plan for long-term funding. Central funding sources include the Healthcare Quality Improvement Partnership (HQIP), NHS England, the Department of Health (DOH) and national commissioners.<sup>22,26,39</sup> Industry can also contribute to funding, although it is important to consider governance around



1  
2  
3 industry access to registry data.<sup>21,29,40,41</sup> Other sources of funding include participating  
4 hospitals,<sup>21</sup> charities,<sup>42</sup> professional societies,<sup>43</sup> annual capitation fees,<sup>36</sup> and charging for  
5 data requests.<sup>26</sup> Registry costs can also be incorporated into the price of each implant.<sup>27</sup>  
6  
7  
8 Funding often comes from multiple sources.<sup>20,21,26,27,44</sup>  
9

### 10 11 12 *Establishing collaborations (1.F)* 13

14  
15 It is important to form strategic national collaborations amongst stakeholders including:  
16 patient groups, clinicians, specialist societies, industry, commissioners, funding bodies,  
17 hospitals, academic groups and those involved in data collection and management.<sup>19,26,27,32</sup>

18  
19 Working with and learning from existing regional registries was a successful strategy  
20 adopted by the National Vascular Registry.<sup>45</sup> International collaborations can help align the  
21 registry with global surgical initiatives<sup>27,38,46</sup> and links with the implant industry can facilitate  
22 implant tracking.<sup>47</sup> Collaborations with national institutes including the National Institute for  
23 Health and Care Excellence (NICE) and the Royal Colleges can align registry data with  
24 national guidelines development and re-validation.<sup>19</sup> Collaborations with geriatrics societies  
25 and charities can help data collection on elderly patients.<sup>20</sup>  
26  
27  
28  
29  
30  
31  
32  
33  
34

### 35 *Registry development and design (1.I)* 36

37  
38 Reaching stakeholder consensus on registry objectives, dataset and activities is  
39 essential.<sup>20,36,48</sup> The registry can be developed from existing smaller registries<sup>45</sup> and piloting  
40 the registry is important in obtaining user feedback.<sup>21,40,49-51</sup> Web-based electronic platforms  
41 facilitate quick and accurate data collection and tailored IT systems can be developed to  
42 provide a secure, interactive and easy-to-use registry platform.<sup>20,29,30,50,52</sup> NICE advises that  
43 registries should be recorded on a national database of registers.<sup>23</sup>  
44  
45  
46  
47  
48  
49

## 50 **Dataset and data management** 51

### 52 53 54 *Rationale behind a registry dataset (1.K)* 55 56 57 58 59 60

1  
2  
3 It is advisable for datasets to be developed through stakeholder and patient consensus  
4 meetings,<sup>48,53,54</sup> with a balance between comprehensibility and feasibility: comprehensive  
5 datasets are unlikely to achieve data completion whilst limited datasets may be less  
6 useful.<sup>24,29,38</sup> Flexible datasets built with the ability to evolve can help promote registry  
7 longevity, but an initial period of consistency helps embed the registry.<sup>26,49</sup> It can also be  
8 useful to build upon existing registry datasets from the same speciality.<sup>28,46,51,54</sup>  
9  
10  
11  
12  
13

14  
15 Whilst collecting quality of life (QoL) and patient reported outcomes (PRO) data is vital for  
16 evaluation of treatments and services,<sup>55,56</sup> collecting such data in the context of a national  
17 registry is resource intensive and may affect data completion.<sup>55</sup> Deciding which PROs to  
18 choose can also be an area of controversy and disagreement.<sup>55</sup> If PROs are introduced, it is  
19 advisable to keep the number of questions short and for these data to be collected directly  
20 from patients at regular, planned time points, rather than relying on clinic follow-ups.<sup>30,55</sup>  
21  
22  
23  
24  
25  
26

27  
28 The design of registry datasets can accommodate national guideline  
29 recommendations;<sup>23,45,57,58</sup> for example the NHFDD dataset is designed to facilitate easy  
30 comparison to NICE guidance,<sup>20</sup> and the National Vascular Registry adapted datasets to  
31 capture key issues highlighted by National Confidential Enquiry into Patient Outcomes and  
32 Deaths (NCEPOD).<sup>45</sup>  
33  
34  
35  
36  
37

#### 38 *Dataset (1.L)*

39  
40  
41  
42 Whilst specific registry data-items vary between surgical specialities; the majority of UK-  
43 surgical registries collect the pre-operative, operative and post-operative data-items  
44 summarised in Table 4. A free text box can also be included to capture additional relevant  
45 information.<sup>30</sup>  
46  
47  
48  
49

#### 50 *Data processing (1.M)*

51  
52  
53  
54 To improve data quality and accuracy, data from participating centres should be internally  
55 validated by local registry managers and clinicians before being cleaned.<sup>21,59,60</sup> Data cleaning  
56 can take place locally or centrally and involves detecting and resolving data problems.<sup>26,28,32</sup>  
57  
58  
59  
60

1  
2  
3 Prior to central analysis, data can be returned to each contributing centre to take any  
4 necessary remedial actions.<sup>26,53,59,61</sup> On site data verification by auditors is considered good  
5 practice.<sup>40,60,62</sup> Although these visits focus on completeness and accuracy of data, they also  
6 provide an important opportunity for education of clinicians and local registry managers  
7 adding to ongoing data quality<sup>40,48,60,62</sup> and for discussion with administrators about  
8 appropriate resources for information management.<sup>60</sup> Feedback through reports evaluating  
9 quality of local data collection can be sent to contributing centres to stimulate  
10 improvements; and independent validation of data including data completeness, mortality,  
11 readmission and revision can be achieved by linking registry patient records to the Office of  
12 National Statistics and Hospital Episode Statistics (HES).<sup>18,35,36,58,60,62,63</sup> NICE recommends  
13 that the process for data collection, storage and analysis should be independent of any  
14 particular company or commercial interest.<sup>23</sup>

#### 25 26 *Data reporting (1.P)*

27  
28  
29 Registries usually publish information via annual on-line comprehensive reports,<sup>21,26,32,36,62-64</sup>  
30 research publications and presentations.<sup>27,39,62,65</sup> There is controversy surrounding the  
31 publication of surgeon specific data. Evidence suggests that publishing this data is  
32 associated with improvements in mortality<sup>62</sup> as well as increased transparency, patient trust  
33 and improved supervision of juniors surgeons,<sup>25,66</sup> with no evidence of 'risk-adverse' surgical  
34 behaviour.<sup>26,62,66</sup> When publishing surgeon specific outcomes, it is important to statistically  
35 adjust for case-mix, to take into account complex, high risk cases.<sup>63,66</sup> It is recommended  
36 that team level data are published to reflect that outcomes are dependant on the entire  
37 surgical team, not solely the consultant surgeon.<sup>66</sup> Minimising the time between the surgical  
38 event and the release of data is also important for the identification of faulty implants or  
39 unsafe practices.<sup>63</sup>

#### 40 41 42 43 44 45 46 47 48 49 50 **Challenges and data completion**

#### 51 52 53 54 *Difficulties encountered/challenges (1.R)*

1  
2  
3 Registries relying on voluntary data submission are dependent on user motivation and are  
4 unlikely to achieve complete data capture.<sup>35,56,67</sup> Voluntary data submission can also result  
5 in reporting bias with underreported complications and a non-consecutive, non-  
6 representative patient group.<sup>35,44,64</sup> Insufficient financial resources for registry development  
7 and maintenance is a frequent challenge<sup>56,68,69</sup> as is lack of stakeholder and patient 'buy-in,'  
8 resulting in poor data quality and completeness.<sup>22,31,43</sup> Registries can be perceived to worsen  
9 documentation pressures, which may compromise data recording and limit  
10 participation.<sup>22,51</sup> Reaching stakeholder consensus on the registry dataset is challenging;<sup>22,70</sup>  
11 and datasets with unclear definitions as well as those unable to adapt to changes in practice  
12 can result in difficulties in drawing national comparisons and tracking surgical  
13 activity.<sup>28,31,43,50,62</sup> Collecting long-term follow-up data can also be challenging, particularly  
14 when patients are under the care of multiple hospitals and clinicians.<sup>25,44,51,55,70</sup>

#### 25 26 *Strategies to increase data completion (1.N)*

27  
28  
29 Data completion can be optimised by careful registry design and by involving stakeholders  
30 throughout its development, promoting 'buy-in'.<sup>25,26</sup> An online registry that is user-friendly,  
31 multi-browser compatible, simple, quick-to-use, and has clear data definitions will increase  
32 data input.<sup>24,26,30</sup> Other optimisation strategies include real-time data input, reminders for  
33 mandatory fields, hover-tip prompts, on-screen data validation checks, numeric limits, auto-  
34 calculations, drop-down menus, calendar support, and limiting free-text fields.  
35  
36  
37  
38  
39  
40  
41  
42  
43  
44  
45  
46  
47  
48  
49  
50  
51  
52  
53  
54  
55  
56  
57  
58  
59  
60  
It is critical that data-input is supported by allocation of dedicated time and  
resources, regional training sessions, succinct user guides, real-time 'chat' support, as well  
as email and telephone support.<sup>19,22,40,43</sup> Mobile 'apps' allow easy remote registry access  
and can also help increase data completion.<sup>22,24,30,47</sup>

Registries that are of clear value to clinicians and institutions are more likely to achieve data  
completion.<sup>25,26,30,46</sup> For example, registry systems producing automated clinic letters or  
operation notes or that help record data for self-audit and revalidation are more likely to be  
used.<sup>18,25,35,37</sup> A research friendly registry can also help increase participation, particularly if  
registry contributors can be listed co-authors.<sup>41,65</sup>

1  
2  
3 Regular performance feedback can help maintain local interest in the registry.<sup>18,19,55</sup> The  
4 NHTD produces online graphs with live data on performance, time-to-surgery, mortality,  
5 length-of-stay (LOS), best practice and patient safety.<sup>20</sup> The NJR has increased registry  
6 participation through a programme of local audits and by issuing data quality certificates  
7 that provide incentive to submit high quality data and highlight hospitals not complying with  
8 mandatory requirements. Another measure employed by the NJR is sharing cost-saving  
9 information on best implant prices, on the proviso that hospital trusts submit data to the  
10 NJR.<sup>27</sup>

11  
12  
13  
14  
15  
16  
17  
18  
19 Regular published reports and journal articles have been found to raise the profile of the  
20 registry, highlight non-participating units and increase data completeness and accuracy.<sup>60</sup>  
21 Advertising can increase awareness and participation via press coverage, emails, society  
22 bulletins, letters to eligible members, conferences, regional meetings, word-of-mouth and  
23 through journal advertisements.<sup>20,35,44,51,58,60,72</sup>

24  
25  
26  
27  
28  
29 Making data input compulsory for revalidation or commissioning, or both, appears to be the  
30 most successful method of increasing data completion.<sup>19,25,27,51,60,62,67,22,70</sup>

### 31 32 33 34 35 **Patient involvement and legal factors**

#### 36 37 38 *Patient involvement (1.Q)*

39  
40  
41  
42 Patient involvement in registry leadership, design, development and reporting increases the  
43 relevance of the registry to patients, commissioners and policy makers.<sup>18,27,31,36,54</sup> Patients  
44 entering their own data via electronic patient portals can be particularly useful in collecting  
45 QoL and long-term follow-up data.<sup>22,24,30,47,55</sup> To help increase registry patient participation  
46 it is important to acquire consent early, have a registry coordinator for patient follow-up,  
47 and have multiple language options.<sup>55</sup> Facilitating patient access to data promotes  
48 transparency, patient choice and involvement.<sup>27,62,63</sup>

#### 49 50 51 52 53 54 55 56 *Legal factors, ethics and data access (1.U)*

1  
2  
3 UK-surgical registries must comply with DOH data protection and information governance  
4 legislation for secure processing of patient healthcare data.<sup>21,36,53</sup> This process can be guided  
5 by the Data Protection Act, General Medical Council (GMC) guidance, the Caldecott  
6 Confidentiality Principles and information found in the Information Governance Toolkit of  
7 the Health and Social Care Information Centre.<sup>36,39,73</sup> The registry should be implemented  
8 and reported in accordance with Declaration of Helsinki ethical principles.<sup>40</sup> Patient  
9 informed consent should be obtained for data submission and data should be anonymised  
10 in all cases.<sup>30,40,53,60,70</sup> Failure to function within a legal framework can result in legal  
11 termination with potential criminal repercussions.<sup>26</sup>  
12  
13  
14  
15  
16  
17  
18  
19

20  
21 Whilst easy access to the registry is essential,<sup>24</sup> data privacy should be maintained and data  
22 should be stored securely and not shared without appropriate permissions.<sup>22,26,32,36,63,70</sup> It is  
23 important for data release to be governed under a defined data-sharing agreement, where  
24 the security and uses of the data are clearly defined.<sup>19,21,36</sup> Registries can have  
25 subcommittees or data managing groups that are responsible for reviewing formal access  
26 requests and ethical assessment.<sup>19,29,36,40</sup>  
27  
28  
29  
30  
31  
32

### 33 **Registry success**

#### 34 *Benefits of registries (1.5)*

35  
36  
37  
38  
39  
40 Surgical registries can help underpin research including randomised controlled trials, assess  
41 and improve cost-effectiveness as well as inform risk-prediction models.<sup>26,36,47,74,75</sup> Other  
42 benefits include improved patient decision-making, treatment development, and  
43 identification of trends in practice.<sup>25,28,56</sup> Registries can facilitate inter(national) comparisons  
44 between centres as well as personal audit and revalidation.<sup>30,35,46,55,67,75</sup> Publically-accessible  
45 registries can increase public trust and promote transparency and patient choice.<sup>61</sup> With the  
46 growing number of surgical implants, registries can help identify both the highest  
47 performing and faulty implants.<sup>47,71,76</sup> The collection, feedback and publication of registry  
48 data is now a recognised way of informing clinical practice, driving quality improvement and  
49 improving patient care and safety.<sup>40,61,63,71</sup> Since the National Audit Cardiac Surgery (NACSA)  
50 registry was introduced, risk-adjusted in-hospital mortality for cardiac surgery in the UK has  
51  
52  
53  
54  
55  
56  
57  
58  
59  
60

1  
2  
3 fallen by over 50% despite more elderly and high-risk patients having surgery each year.<sup>26</sup>  
4 Following the start of the NHFD, rates of early surgery increased from 54.5% to 71.3% and  
5  
6 thirty-day mortality fell from 10.9% to 8.5%.<sup>20</sup>  
7  
8  
9

10 Registry data can support agencies to monitor and evaluate the quality of healthcare  
11 delivered.<sup>20</sup> They can also help identify national variations in service provisioning, map and  
12 evaluate patient pathways as well as inform health service commissioning and  
13 policy.<sup>37,45,56,58,71,74,77</sup> Regulatory organisations including NICE recognise the value of  
14 registries in technology assessment particularly in the absence of formal trials.<sup>23,44,70</sup> When  
15 compared to trials, registries require fewer resources and often collect data from a broader  
16 population base so their findings have strong external validity.<sup>41,78</sup> They also frequently  
17 provide data on long-term outcomes that exceed the study window of a trial.<sup>65</sup> They can be  
18 of particular value when investigating patient groups that are usually excluded from clinical  
19 trials such as the elderly.<sup>79</sup>  
20  
21  
22  
23  
24  
25  
26  
27  
28

### 29 *Measures of a successful registry (1.T)*

30  
31  
32  
33 A successful registry is one that is easily accessible, has a high degree of data completion  
34 and participation and helps promote inter(national) collaboration.<sup>22,26,63,68,69</sup> They provide  
35 timely feedback to their users, identify trends in practice, improve standards of care and  
36 identify failures at the earliest opportunity.<sup>20,48,63</sup> Successful registries are useful to their  
37 stakeholders and contain validated data that are accurate and easy to analyse.<sup>22,39,55,71,79</sup>  
38  
39  
40  
41  
42

## 43 **DISCUSSION**

44  
45  
46  
47 In this systematic review, we have identified the fundamentals for developing a successful  
48 UK-surgical registry. Whilst we highlight the need for a registry of auditory implants, our  
49 findings have implications to the wider surgical community since we provide information  
50 that can be used to inform the development of any UK-surgical registry.  
51  
52  
53  
54

### 55 **Summary of findings**

1  
2  
3 The fundamentals to successful registry development identified by this synthesis are  
4 summarised in Figure 2 and include: steering committee to lead and oversee the registry;  
5 clear registry objectives; planning for initial and long-term funding; strategic national  
6 collaborations amongst key stakeholders; dedicated registry management team; consensus  
7 meetings to agree registry dataset; established data processing systems; anticipating  
8 challenges; implementing strategies to increase data completion. Patient involvement and  
9 awareness of legal factors should occur throughout the developmental process.  
10  
11  
12  
13  
14  
15  
16

### 17 **Relevance to existing research**

18 There is a clear need for surgical registry data to improve patient safety and help regulate  
19 surgical practices. Concerns over the evidence base for surgical implants in general has been  
20 raised by the IDEAL collaborative and the House of Commons Science and Technology  
21 committee.<sup>3,80</sup> Across the UK and EU, implants can enter surgical practice on the basis of  
22 equivalence data, meaning that an implant can be used on the basis of similarity to another  
23 implant rather than evidence of its own safety and effectiveness.<sup>3,80</sup> Transparency and post-  
24 market surveillance are additional concerns with data on safety and performance of  
25 implants not being fully published.<sup>3</sup> The recall of the PIP breast implants and metal on metal  
26 hip implants identify the dangers of relying on equivalence data for the evaluation of safety  
27 and efficacy.<sup>1,2</sup>  
28  
29  
30  
31  
32  
33  
34  
35  
36  
37

38 Owing to these concerns, the IDEAL collaborative, DOH, NICE, policymakers and  
39 commissioning groups have called for surgical registries that can collect prospective  
40 outcome and safety data, promote transparency as well as provide patients and the public  
41 with information on their care.<sup>3,8,11,80,81</sup> It has also been recognised that registry data can  
42 serve as a valuable alternative to randomised trials, which can be unfeasible and of limited  
43 scientific use - particularly at the development stage of a surgical innovation.<sup>41,65</sup> When  
44 compared to trials, registries require fewer resources, have stronger external validity and  
45 tend to provide longer term outcome data.<sup>41,65</sup>  
46  
47  
48  
49  
50  
51  
52  
53

### 54 **Implications**

55 This review provides evidence based knowledge on registry development that can be used  
56 by existing and developing UK-surgical registries to increase their chance of success.  
57  
58  
59  
60



1  
2  
3 Successful registries provide essential clinical and cost-effectiveness data for policy and  
4 guidelines development.<sup>26,47,74,75</sup> They also help develop (inter)national research  
5 collaborations as well as promote patient choice, trust and transparency.<sup>25,28,56,61</sup> Other  
6 implications include facilitating inter(national) benchmarking and personal audit.<sup>35,46,55,67,75</sup>  
7  
8 Successful registries help drive healthcare quality improvement, improve patient safety and  
9 allow commissioners and service providers to monitor quality, detect faulty implants early,  
10 monitor patient usage, identify variations in practice and allocate payments  
11 fairly.<sup>45,47,56,71,74,76</sup> From an international perspective, this review provides a methodological  
12 framework that can be adopted by other countries to promote successful national surgical  
13 registry development.  
14  
15  
16  
17  
18  
19  
20  
21

### 22 **Strengths and Limitations**

23  
24 We did not perform quality assessment of the publications included in this review. This was  
25 principally due to the non-empirical nature of included publications and the considerable  
26 heterogeneity amongst types of included publications, which included annual registry  
27 reports and analyses, registry overview documents, editorials, commentaries, registry  
28 proposal documents and registry review articles. We acknowledge that by excluding non-  
29 surgical registries, we may have failed to capture important information on registry  
30 development. Our decision was based on surgical registries having specific attributes that  
31 we wanted to learn from including: datasets, strategies to increase surgeon 'buy in', funding  
32 sources, key challenges and others.  
33  
34  
35  
36  
37  
38  
39  
40  
41

42 A key strength of this review is that it provides an evidence based foundation for the  
43 development of any surgical registry. We adopted a rigorous approach searching both the  
44 scientific and grey literature and used thematic analysis to develop our data extraction  
45 table. Moreover, data analyses at all stages were cross checked by a second judge and  
46 discussed at consensus meetings.  
47  
48  
49  
50  
51

### 52 **CONCLUSION**

1  
2  
3 This systematic review provides robust knowledge that can be used to inform the successful  
4 development of any UK-surgical registry. It also provides a methodological framework for  
5 international surgical registry development.  
6  
7  
8  
9

10 **Contributors:** R.M and J.P conducted the title, abstract and full-text review for this study,  
11 and performed the data extraction. All authors were involved in drafting the manuscript.  
12 R.M, A.K, A.S, E.M, P.L developed the search strategy. All authors were involved in  
13 conceiving the idea for this study and drafted major parts of the manuscript. All authors  
14 read and approved the final manuscript.  
15  
16  
17  
18  
19

20 **Acknowledgements:** None  
21  
22  
23

24 **Competing interests:** None declared  
25  
26  
27

28 **Funding:** This work was supported by: NICE Scholarship, NIHR Academic Clinical Fellowship,  
29 NIHR Research Professorship, UCL Public Policy Small Grants Scheme. Funders were not  
30 involved in study design, data collection, data analysis, manuscript preparation or  
31 publication. All authors had complete access to the study data that support the publication.  
32  
33  
34  
35  
36

37 **Provenance and peer review:** Not commissioned; externally peer reviewed.  
38  
39

40 **Data sharing:** No additional data available  
41  
42  
43

## 44 REFERENCES

- 45  
46  
47  
48 1 Oulharj S, Pauchot J, Tropet Y. PIP breast implant removal: a study of 828 cases.  
49 *J Plast Reconstr Aesthet Surg* 2014;**67**:302–307.  
50  
51  
52  
53 2 Smith AJ, Dieppe P, Vernon K, *et al*. Failure rates of stemmed metal-on-metal  
54 hip replacements: analysis of data from the National Joint Registry of England  
55  
56  
57  
58  
59  
60

1  
2  
3 and Wales. *Lancet* 2012;**379**:1199–1204.  
4  
5

6  
7 3 House of Commons Science and Technology Committee (2012). Regulation of  
8  
9 Medical Implants in the UK and EU;  
10  
11 [http://www.publications.parliament.uk/pa/cm201213/cmselect/cmsstech/163/](http://www.publications.parliament.uk/pa/cm201213/cmselect/cmsstech/163/163.pdf)  
12  
13 163.pdf [accessed 12 October 2016]  
14  
15

16  
17 4 Hearing loss: an important global health concern. *Lancet* 2016;**387**:2351.  
18  
19

20  
21 5 Committee on Accessible and Affordable Hearing Health Care for Adults, Board  
22  
23 on Health Sciences Policy, Health and Medicine Division, National Academies of  
24  
25 Sciences, Engineering, and Medicine. Hearing Health Care for Adults [Internet].  
26  
27 Blazer DG, Domnitz S, Liverman CT, editors. Washington, D.C: National  
28  
29 Academies Press; 2016. <http://www.nap.edu/23446> [accessed 2 November  
30  
31 2016]  
32  
33

34  
35 6 Leverton T. Hearing loss is important in dementia. *BMJ* 2015;**350**:h3650.  
36  
37

38  
39 7 Lamb B, O'Neill C, Atkins J. The Real Cost of Adult Hearing Loss. Ear Foundation  
40  
41 2014. <http://www.earfoundation.org.uk/news/articles> [accessed 5 November  
42  
43 2016]  
44  
45

46  
47 8 Department of Health. Action Plan on Hearing Loss 2015.  
48  
49 [https://www.england.nhs.uk/wp-content/uploads/2015/03/act-plan-hearing-](https://www.england.nhs.uk/wp-content/uploads/2015/03/act-plan-hearing-loss-upd.pdf)  
50  
51 loss-upd.pdf 13 [accessed 12 November 2016]  
52  
53

54  
55 9 NHS England 2016 Clinical Commissioning Policy: Bone conducting hearing  
56  
57 implants (BCHIs) for hearing loss (all ages).  
58  
59  
60

- 1  
2  
3  
4  
5  
6  
7  
8  
9  
10  
11  
12  
13  
14  
15  
16  
17  
18  
19  
20  
21  
22  
23  
24  
25  
26  
27  
28  
29  
30  
31  
32  
33  
34  
35  
36  
37  
38  
39  
40  
41  
42  
43  
44  
45  
46  
47  
48  
49  
50  
51  
52  
53  
54  
55  
56  
57  
58  
59  
60
- https://www.england.nhs.uk/commissioning/wp-content/uploads/sites/12/2013/05/16041\_FINAL.pdf [accessed 15 August 2016]
- 10 NHS Commissioning Board (2013). Clinical Commissioning Policy: Bone Anchored Hearing Aids. <https://www.england.nhs.uk/wp-content/uploads/2013/04/d09-p-a.pdf> [accessed 15 August 2016]
- 11 National Institute of Health & Care Excellence. Cochlear implants for children and adults with severe to profound deafness. NICE technology appraisal guidance 2009 [TA166].
- 12 Ear Foundation. National Bone Conducting Hearing Implant Registry. <http://www.earfoundation.org.uk/hearing-technologies/bone-conducting-hearing-implants/national-bone-conducting-hearing-implant-registry> [accessed 14 September 2016]
- 13 GENERATE. The Research Agenda for ENT, Hearing and Balance Care. A UK Partnership of Patients, Professionals and the Public. <https://entuk.org/sites/default/files/files/Research%20Agenda%20ENT%20Hearing%20and%20Balance%2030%2011%2015.pdf> [accessed 14<sup>th</sup> September 2016]
- 14 Gliklich RE, Dreyer NA, Leavy MB. Registries for Evaluating Patient Outcomes: A User's Guide, 3rd edn. Rockville (MD): Agency for Healthcare Research and Quality (US), 2014
- 15 Workman TA. Engaging Patients in Information Sharing and Data Collection: The Role of Patient-Powered Registries and Research Networks. Rockville (MD):

- 1  
2  
3 Agency for Healthcare Research and Quality (US), 2013  
4  
5  
6  
7 16 Moher D, Altman DG, Liberati A, *et al.* PRISMA statement. *Epidemiology*.  
8  
9 2011;**22**:128–authorreply128.  
10  
11  
12 17 Popay J, Roberts H, Sowden A, *et al.* Guidance on the conduct of Narrative  
13  
14 Synthesis in Systematic review. A Product from the ESRC methods programme  
15  
16 (2009).  
17  
18 [http://www.lancaster.ac.uk/shm/research/nssr/research/dissemination/publica](http://www.lancaster.ac.uk/shm/research/nssr/research/dissemination/publications/NS_Synthesis_Guidance_v1.pdf)  
19  
20 [tions/NS\\_Synthesis\\_Guidance\\_v1.pdf](http://www.lancaster.ac.uk/shm/research/nssr/research/dissemination/publications/NS_Synthesis_Guidance_v1.pdf) [accessed 10 October 2016]  
21  
22  
23  
24  
25 18 NELA Project Board. National Emergency Laparotomy Audit (NELA) Protocol  
26  
27 2014.  
28  
29  
30 19 Ludman PF. The UK transcatheter aortic valve implantation registry; one of the  
31  
32 suite of registries hosted by the National Institute for Cardiovascular Outcomes  
33  
34 Research (NICOR). *Heart* 2012;**98**:1787–1789.  
35  
36  
37  
38 20 National Hip Fracture Database NHFD workstream delivery team. National Hip  
39  
40 Fracture Registry Annual Report 2015.  
41  
42  
43  
44 21 Kolas AG, Bulters DO, Cowie CJ, *et al.* Proposal for establishment of the UK  
45  
46 Cranial Reconstruction Registry (UKCRR). *Br J Neurosurg* 2014;**28**:310–314.  
47  
48  
49  
50 22 Breakwell LM, Cole AA, Birch N, *et al.* Should we all go to the PROM? The first  
51  
52 two years of the British Spine Registry. *Bone Joint J* 2015;**97-B**:871–874.  
53  
54  
55  
56 23 National Institute for Health and Care Excellence. Interventional procedures  
57  
58 programme manual. 2016. <https://www.nice.org.uk/process/pmg/chapter/draft->  
59  
60

1  
2  
3 recommendationsdata-collection-to-address-uncertainty [accessed 16<sup>th</sup>  
4  
5 November 2016]  
6  
7

- 8  
9 24 Gabr A, O'Leary S, Spalding T, *et al.* The UK National Ligament Registry Report  
10  
11 2015. *Knee* 2015;**22**:351–353.  
12  
13  
14 25 Welbourn R, Small P, Finlay I, *et al.* The UK national bariatric surgery registry:  
15  
16 The second report 2014.  
17  
18  
19 26 Hickey GL, Grant SW, Cosgriff R, *et al.* Clinical registries: governance,  
20  
21 management, analysis and applications. *Eur J Cardiothorac Surg* 2013;**44**:605–  
22  
23 614.  
24  
25  
26  
27  
28 27 The NJR Editorial Board. National Joint Registry 12th Annual Report.  
29  
30  
31 28 Head SJ, Howell NJ, Osnabrugge RLJ, *et al.* The European Association for Cardio-  
32  
33 Thoracic Surgery (EACTS) database: an introduction. *Eur J Cardiothorac Surg*  
34  
35 2013;**44**:e175–e180.  
36  
37  
38  
39 29 Chadwick D, Kinsman R, Walton P. The British Association of Endocrine and  
40  
41 Thyroid Surgeons 4th National Audit Report. 2012.  
42  
43  
44  
45 30 Hazari A, Walton P. The UK National Flap Registry (UKNFR): A National Database  
46  
47 for all pedicled and free flaps in the UK. *J Plast Reconstr Aesthet Surg.*  
48  
49 2015;**68**:1633–1636.  
50  
51  
52  
53 31 Briggs V, Pitcher D, Shaw C, *et al.* UK Renal Registry 16th annual report: chapter  
54  
55 14 2012 multisite dialysis access audit in England, Northern Ireland and Wales  
56  
57 and 2011 PD one year follow-up: national and centre-specific analyses. *Nephron*

- 1  
2  
3 *Clin Pract.* 2013;**125**:275–294.  
4  
5  
6  
7 32 Connolly SS, Rochester MA. Nephroureterectomy surgery in the UK in 2012:  
8  
9 British Association of Urological Surgeons (BAUS) Registry data. *BJU Int*  
10  
11 2015;**116**:780–790.  
12  
13  
14 33 Berven SH, Yaszemski MJ, Newton PO, *et al.* Introduction of new devices and  
15  
16 technologies into a spine surgery practice: a review of processes and  
17  
18 regulations. *Orthopedics* 2010;**33**:742–747.  
19  
20  
21  
22 34 Mason RH, Foley NM, Branley HM, *et al.* Pulmonary Langerhans cell  
23  
24 histiocytosis (PLCH): a new UK register. *Thorax* 2014;**69**:766–767.  
25  
26  
27  
28 35 Armitage JN, Irving SO, Burgess NA. Percutaneous nephrolithotomy in the  
29  
30 United kingdom: results of a prospective data registry. *Eur Urol* 2012;**61**:1188–  
31  
32 1193.  
33  
34  
35  
36 36 Caskey F, Castledine C, Dawney A, *et al.* UK Renal Registry 18th Annual Report  
37  
38 2016.  
39  
40  
41  
42 37 Auditbase. Advanced clinic management (2016).  
43  
44 <https://www.auditdata.com/all-products-and-services/clinic->  
45  
46 [management/auditbase](https://www.auditdata.com/all-products-and-services/clinic-) [accessed 23 October 2016]  
47  
48  
49  
50 38 Yung M, Gjuric M, Haeusler R, *et al.* An international otology database. *Otol*  
51  
52 *Neurotol* 2005;**26**:1087–1092.  
53  
54  
55  
56 39 Shakespeare PG, Bazire N, Whitworth IH. The UK breast implant registry-ten  
57  
58 years on. *Br J Plast Surg* 2005;**58**:283–285.  
59  
60

- 1  
2  
3 40 Bulusu VR, Fullarton J, Leahy M, *et al.* Rationale and design of a UK database for  
4 a rare cancer type: the GEM Registry for gastrointestinal stromal tumours. *Br J*  
5 *Cancer* 2013;**109**:1403–1407.  
6  
7  
8  
9  
10  
11 41 Elson DW, Dawson M, Wilson C, *et al.*. The UK Knee Osteotomy Registry  
12 (UKKOR). *Knee* 2015;**22**:1–3.  
13  
14  
15  
16  
17 42 Bates T, Kearins O, Monypenny I, *et al.* Clinical outcome data for symptomatic  
18 breast cancer: the Breast Cancer Clinical Outcome Measures (BCCOM) Project.  
19 *Br J Cancer* 2009;**101**:395–402.  
20  
21  
22  
23  
24  
25 43 Uberoi R, Das N, Moss J, *et al.* British Society of Interventional Radiology: Biliary  
26 Drainage and Stenting Registry (BDSR). *Cardiovasc Intervent Radiol*  
27 2012;**35**:127–138.  
28  
29  
30  
31  
32  
33 44 Thomas SM, Beard JD, Ireland M, *et al.* Results from the prospective registry of  
34 endovascular treatment of abdominal aortic aneurysms (RETA): mid term  
35 results to five years. *Eur J Vasc Endovasc Surg* 2005;**29**:563–570.  
36  
37  
38  
39  
40  
41 45 Clinical Effectiveness Unit, The Royal College of Surgeons of England. National  
42 Vascular Registry 2015 Annual Report.  
43  
44  
45  
46 46 de Steur WO, Henneman D, Allum WH, *et al.* Common data items in seven  
47 European oesophagogastric cancer surgery registries: towards a European  
48 upper GI cancer audit (EURECCA Upper GI). *Eur J Surg Oncol* 2014;**40**:325–329.  
49  
50  
51  
52  
53  
54 47 Breakwell LM. Understanding the need for spinal registries: Lee Breakwell  
55 reviews the importance of registries in spinal research and explains why the  
56  
57  
58  
59  
60



- 1  
2  
3 British Association of Spinal Surgeons (BASS) has decided to set up its own  
4  
5 registry. *Eur Spine J* 2013;**22 Suppl 1**:S5–S6.  
6  
7  
8  
9 48 Yung M, Heyning PV de. A prospective multicentre otology database. *Adv*  
10  
11 *Otorhinolaryngol* 2007;**65**:335–339.  
12  
13  
14 49 Sher JL, Reed MR, Calvert P, *et al*. Influencing the national training agenda. The  
15  
16 UK & Ireland orthopaedic eLogbook. *J Bone Joint Surg Br* 2005;**87**:1182–1186.  
17  
18  
19  
20 50 Chalmers N, Jones K, Drinkwater K, *et al*. The UK nephrostomy audit. Can a  
21  
22 voluntary registry produce robust performance data? *Clin Radiol* 2008;**63**:888–  
23  
24 894.  
25  
26  
27  
28 51 Mangera A, B P. BAUS Section of Endourology national Uteroscopy audit:  
29  
30 setting the standards for revalidation. *Journal of clinical urology* 2013;**6**:45–49.  
31  
32  
33  
34 52 PELICAN cancer foundation. LOREC APE Perineal Wound Registry.  
35  
36 <http://www.lorec.nhs.uk/system/content.asp?pkey=17> [accessed 20 October  
37  
38 2016]  
39  
40  
41  
42 53 Moat NE, Ludman P, de Belder MA, *et al*. Long-term outcomes after  
43  
44 transcatheter aortic valve implantation in high-risk patients with severe aortic  
45  
46 stenosis: the U.K. TAVI (United Kingdom Transcatheter Aortic Valve  
47  
48 Implantation) Registry. *J Am Coll Cardiol* 2011;**58**:2130–2138.  
49  
50  
51  
52 54 Briggs V, Pitcher D, Braddon F, *et al*. UK Renal Registry 15th annual report:  
53  
54 Chapter 8 UK multisite peritoneal dialysis access catheter audit for first PD  
55  
56 catheters 2011. *Nephron Clin Pract* 2013;**123 Suppl 1**:165–181.  
57  
58  
59  
60

- 1  
2  
3 55 Franklin PD, Harrold L, Ayers DC. Incorporating patient-reported outcomes in  
4 total joint arthroplasty registries: challenges and opportunities. *Clin Orthop*  
5  
6  
7  
8 *Relat Res* 2013;**471**:3482–3488.  
9
- 10  
11 56 Bates T, Kearins O, Monypenny I, *et al*. Clinical outcome data for symptomatic  
12 breast cancer: the Breast Cancer Clinical Outcome Measures (BCCOM) Project.  
13  
14  
15 *Br J Cancer* 2009;**101**:395–402.  
16
- 17  
18  
19 57 National Bowel Cancer Audit Project Team. The National Bowel Cancer Audit  
20 report 2015.  
21  
22  
23
- 24  
25 58 Health and Social Care Information Centre. National Head and Neck Cancer  
26 Audit 2014.  
27  
28  
29
- 30  
31 59 Head SJ, Howell NJ, Osnabrugge RLJ, *et al*. The European Association for Cardio-  
32 Thoracic Surgery (EACTS) database: an introduction. *Eur J Cardiothorac Surg*  
33  
34  
35 2013;**44**:e175–e180.  
36  
37
- 38  
39 60 Clarke DR, Breen LS, Jacobs ML, *et al*. Verification of data in congenital cardiac  
40 surgery. *Cardiol Young* 2008;**18 Suppl 2**:177–187.  
41  
42  
43
- 44  
45 61 Hickey GL, Cosgriff R, Grant SW, *et al*. A technical review of the United Kingdom  
46 National Adult Cardiac Surgery Governance Analysis 2008-11. *Eur J Cardiothorac*  
47  
48  
49 *Surg* 2014;**45**:225–233.  
50  
51
- 52  
53 62 Bridgewater B. Cardiac registers: the adult cardiac surgery register. *Heart*  
54  
55  
56 2010;**96**:1441–1443.  
57
- 58  
59 63 Jacobs ML, Jacobs JP, Franklin RCG, *et al*. Databases for assessing the outcomes  
60

- 1  
2  
3 of the treatment of patients with congenital and paediatric cardiac disease--the  
4  
5 perspective of cardiac surgery. *Cardiol Young* 2008;**18 Suppl 2**:101–115.  
6  
7  
8  
9 64 Wyatt MG. Registries versus trials for the evaluation of the endovascular  
10  
11 treatment of abdominal aortic aneurysms. *Eur J Vasc Endovasc Surg*  
12  
13 2005;**29**:560–562.  
14  
15  
16  
17 65 Biancari F, Ruggieri VG, Perrotti A, *et al*. European Multicenter Study on  
18  
19 Coronary Artery Bypass Grafting (E-CABG registry): Study Protocol for a  
20  
21 Prospective Clinical Registry and Proposal of Classification of Postoperative  
22  
23 Complications. *J Cardiothorac Surg* 2015;**10**:90.  
24  
25  
26  
27 66 Chou E, Abboudi H, Shamim Khan M, *et al*. Should surgical outcomes be  
28  
29 published? *J R Soc Med* 2015;**108**:127–135.  
30  
31  
32  
33 67 Divecha HM, Siddique I, Breakwell LM, *et al*. Complications in spinal deformity  
34  
35 surgery in the United Kingdom: 5-year results of the annual British Scoliosis  
36  
37 Society National Audit of Morbidity and Mortality. *Eur Spine J* 2014;**23**  
38  
39 **Suppl1**:S55–S60.  
40  
41  
42  
43 68 Sharma S, Dreghorn CR. Registry of shoulder arthroplasty - the Scottish  
44  
45 experience. *Ann R Coll Surg Engl* 2006;**88**:122–126.  
46  
47  
48  
49 69 Hussey K, Siddiqui T, Burton P, *et al*. Understanding administrative abdominal  
50  
51 aortic aneurysm mortality data. *Eur J Vasc Endovasc Surg* 2015;**49**:277–282.  
52  
53  
54  
55 70 Hopkins J, Welbourn R. The importance of national registries/databases in  
56  
57 metabolic surgery: the UK experience. *Surg Obes Relat Dis* 2016;**12**:1178–1185.  
58  
59  
60

- 1  
2  
3 71 Goldberg AJ, MacGregor A, Spencer SA. An information revolution in  
4  
5 orthopaedics. *J Bone Joint Surg Br* 2012;**94**:454–458.  
6  
7  
8  
9 72 Knight JS, Senapati A, Lamparelli MJ. National UK audit of procedure for  
10  
11 prolapsing haemorrhoids on behalf of the Association of Coloproctology of  
12  
13 Great Britain and Ireland. *Colorectal Dis* 2008;**10**:440–445.  
14  
15  
16  
17 73 Health and Social Care Information Centre. Information Governance Toolkit.  
18  
19 <https://www.igt.hscic.gov.uk> [accessed 23 March 2016]  
20  
21  
22  
23 74 Patrick H, Sims A, Burn J, *et al.* Monitoring the use and outcomes of new devices  
24  
25 and procedures: how does coding affect what Hospital Episode Statistics  
26  
27 contribute? Lessons from 12 emerging procedures 2006-10. *J Public Health*  
28  
29 (*Oxf*) 2013;**35**:132–138.  
30  
31  
32  
33 75 Larsson S, Lawyer P, Garellick G, *et al.* Use of 13 disease registries in 5 countries  
34  
35 demonstrates the potential to use outcome data to improve health care's value.  
36  
37 *Health Aff (Millwood)* 2012;**31**:220–227.  
38  
39  
40  
41 76 O'Dowd A. Government considers a national implant register in review of  
42  
43 cosmetic procedures. *BMJ* 2012;**345**:e5574.  
44  
45  
46  
47 77 Sabah SA, Henckel J, Koutsouris S, *et al.* Are all metal-on-metal hip revision  
48  
49 operations contributing to the National Joint Registry implant survival curves? :  
50  
51 a study comparing the London Implant Retrieval Centre and National Joint  
52  
53 Registry datasets. *Bone Joint J* 2016;**98-B**:33–39.  
54  
55  
56  
57 78 Suradi HS, Hijazi ZM. TAVR update: Contemporary data from the UK TAVI and  
58  
59  
60

- 1  
2  
3 US TVT registries. *Glob Cardiol Sci Pract* 2015;**2015**:21.  
4  
5  
6  
7 79 van Gijn W, van de Velde CJH. Quality assurance through outcome registration  
8  
9 in colorectal cancer: an ECCO initiative for Europe. *Acta Chir Iugosl* 2010;**57**:17–  
10  
11 21.  
12  
13  
14 80 McCulloch P, Cook JA, Altman DG, *et al*. IDEAL framework for surgical  
15  
16 innovation 1: the idea and development stages. *BMJ* 2013;**346**:f3012.  
17  
18  
19  
20 81 NHS Commissioning Board. Clinical Commissioning Policy: Active Middle Ear  
21  
22 Implants. [https://www.england.nhs.uk/commissioning/wp-](https://www.england.nhs.uk/commissioning/wp-content/uploads/sites/12/2013/04/d09-ps-a.pdf)  
23  
24 content/uploads/sites/12/2013/04/d09-ps-a.pdf [accessed 13 November 2016]  
25  
26  
27  
28 82 Moller H, Richards S, Hanchett N, *et al*. Completeness of case ascertainment  
29  
30 and survival time error in English cancer registries: impact on 1-year survival  
31  
32 estimates. *Br J Cancer* 2011;**105**:170–176.  
33  
34  
35  
36 83 Knight JS, Senapati A, Lamparelli MJ. National UK audit of procedure for  
37  
38 prolapsing haemorrhoids on behalf of the Association of Coloproctology of  
39  
40 Great Britain and Ireland. *Colorectal Dis* 2008;**10**:440–445.  
41  
42  
43  
44 84 Nelson P, Nieuwenhuijsen M, Jensen TK, *et al*. Prevalence of hypospadias in the  
45  
46 same geographic region as ascertained by three different registries. *Birth*  
47  
48 *Defects Res A Clin Mol Teratol* 2007;**79**:685–687.  
49  
50  
51  
52 85 Briggs V, Wilkie M. Chapter 14 Comparative audit of peritoneal dialysis catheter  
53  
54 placement in England, Northern Ireland and Wales in 2011: a summary of  
55  
56 progress to July 2012. *Nephron Clin Pract* 2012;**120 Suppl 1**: c261–c263.  
57  
58  
59  
60

- 1  
2  
3 86 Hing CB, Stiehl JB. Editorial. *Knee* 2014;**22**:279–358.  
4  
5  
6 87 Mitchell D, Lees T. The benefits of comparative audit in vascular surgery. *Eur J*  
7  
8  
9 *Vasc Endovasc Surg* 2011;**42**:508–509.  
10  
11  
12 88 Sessler DI. Big Data-and its contributions to peri-operative medicine.  
13  
14 *Anaesthesia* 2014;**69**:100–105.  
15  
16  
17 89 Uberoi R, Milburn S, Moss J, *et al.* on Behalf of the BIAS Registry Contributors.  
18  
19 *Cardiovasc Intervent Radiol* 2009;**32**:887-895  
20  
21  
22  
23 90 Goode SD, Cleveland TJ, Gaines PA. United Kingdom Carotid Artery Stent  
24  
25 Registry: Short- and Long-Term Outcomes. *Cardiovasc Intervent Radiol*  
26  
27  
28 2013;**36**:1221-1231  
29  
30  
31  
32  
33  
34  
35  
36  
37  
38  
39  
40  
41  
42  
43  
44  
45  
46  
47  
48  
49  
50  
51  
52  
53  
54  
55  
56  
57  
58  
59  
60

1  
2  
3  
4  
5  
6  
7  
8  
9  
10  
11  
12  
13  
14  
15  
16  
17  
18  
19  
20  
21  
22  
23  
24  
25  
26  
27  
28  
29  
30  
31  
32  
33  
34  
35  
36  
37  
38  
39  
40  
41  
42  
43  
44  
45  
46  
47  
48  
49  
50  
51  
52  
53  
54  
55  
56  
57  
58  
59  
60

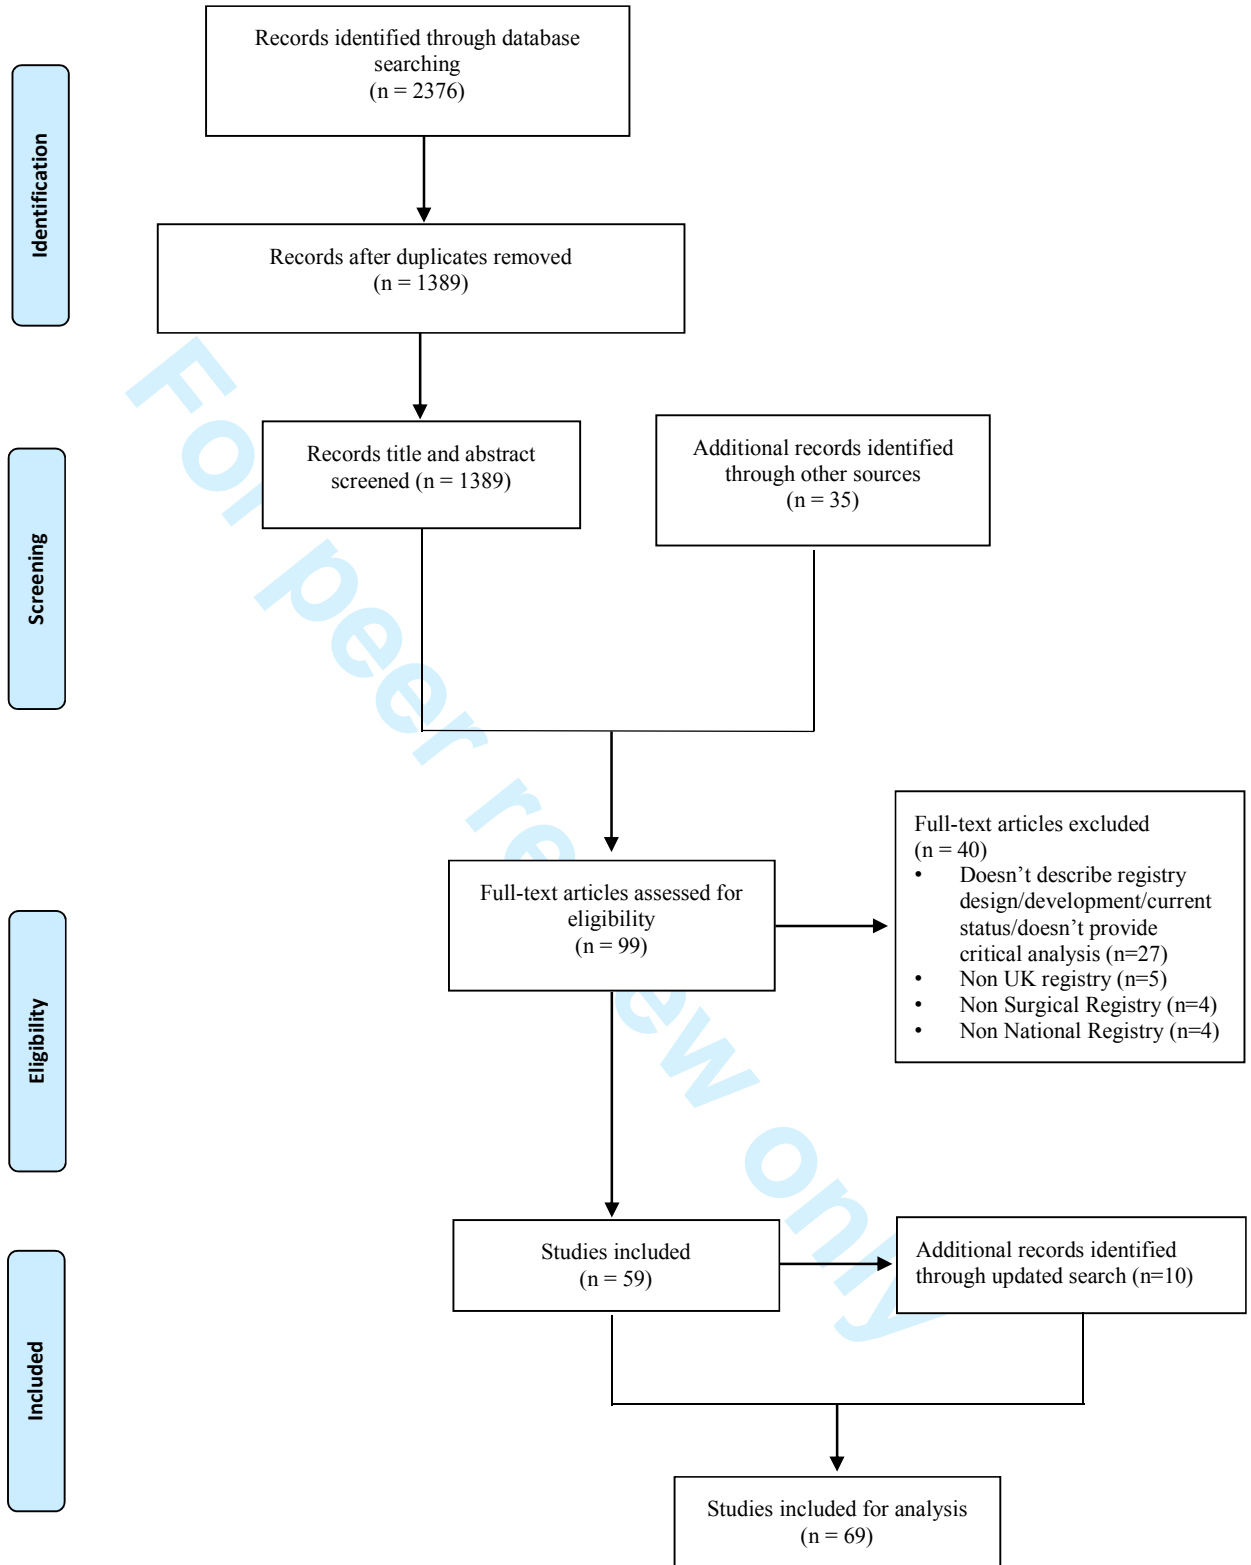

Figure 1. PRISMA Diagram

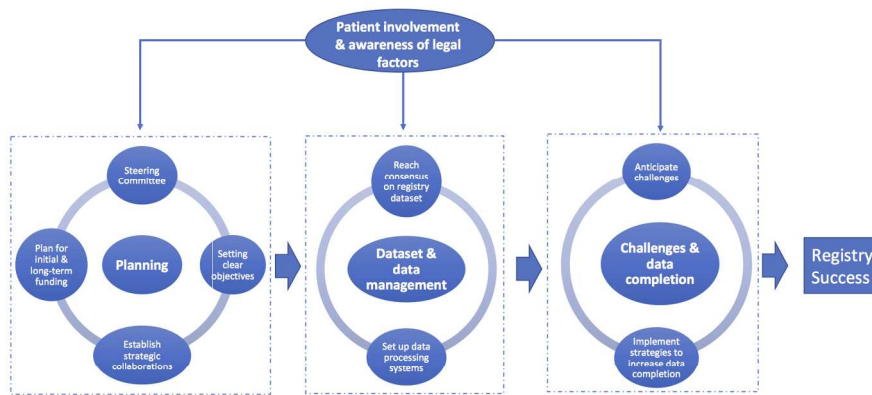

Figure 2: Overview of the key steps required for the development of a successful UK surgical registry

338x190mm (150 x 150 DPI)

review only

1  
2  
3  
4  
5  
6  
7  
8  
9  
10  
11  
12  
13  
14  
15  
16  
17  
18  
19  
20  
21  
22  
23  
24  
25  
26  
27  
28  
29  
30  
31  
32  
33  
34  
35  
36  
37  
38  
39  
40  
41  
42  
43  
44  
45  
46  
47  
48  
49  
50  
51  
52  
53  
54  
55  
56  
57  
58  
59  
60



**Table 1: Represented surgical specialities**

| <b>Surgical speciality</b> |
|----------------------------|
| Orthopaedics               |
| Renal Surgery              |
| Neurosurgery               |
| Cardiac Surgery            |
| Upper GI Surgery           |
| Urology                    |
| Plastic Surgery            |
| Breast Surgery             |
| Colorectal Surgery         |
| Cardiothoracic Surgery     |
| Vascular Surgery           |
| Endocrine surgery          |
| ENT Surgery                |

**Table 2: Data column headings and their descriptions**

| <b>Dataset column headings</b>         | <b>Description</b>                                                                              |
|----------------------------------------|-------------------------------------------------------------------------------------------------|
| Author(s)                              | Author of article                                                                               |
| Title                                  | Title of article                                                                                |
| Year                                   | Year of publication                                                                             |
| Name of registry                       | Name of registry                                                                                |
| Type of surgery                        | Operation(s) captured by the registry                                                           |
| Collaborations                         | Collaborations developed for the registry                                                       |
| Registry leadership and management     | How the registry was managed and/or lead                                                        |
| Objective(s)                           | The objective(s) of the registry                                                                |
| Registry development and/or design     | How the registry was developed and/or designed                                                  |
| Funding                                | How the registry was funded                                                                     |
| Rationale behind dataset               | The rationale behind selecting the registry dataset                                             |
| Dataset                                | The dataset of the registry                                                                     |
| Data processing                        | How the registry data were processed                                                            |
| Strategies to increase data completion | Strategies used/found by the registry to increase data completion                               |
| Data reporting                         | How the registry reported/disseminated their results                                            |
| Patient involvement                    | How patients were involved in the registry and viewpoints on patient involvement in registries. |
| Difficulties encountered/challenges    | Difficulties and challenges encountered by the registry                                         |
| Benefits of registries                 | The benefits of the registry                                                                    |
| Measures of a successful registry      | Factors that determine a successful registry                                                    |
| Legal factors, ethics and data access  | Legal factors, ethics and data access for the registry                                          |

Table 3: Publications contributing to each data extraction column

| Collaborations                                        | Registry management /leadership                                            | Objectives                                      | Registry development /design                                                  | Funding                                                              | Rationale behind dataset                     | Dataset                                                                    | Data processing                                                                           | Strategies to increase data completion                                     | Data reporting                                        | Patients involvement             | Difficulties encountered /challenges                                 | Benefits of registry                                                    | Measures of a successful registry | Legal factors, ethics and data access                                   |
|-------------------------------------------------------|----------------------------------------------------------------------------|-------------------------------------------------|-------------------------------------------------------------------------------|----------------------------------------------------------------------|----------------------------------------------|----------------------------------------------------------------------------|-------------------------------------------------------------------------------------------|----------------------------------------------------------------------------|-------------------------------------------------------|----------------------------------|----------------------------------------------------------------------|-------------------------------------------------------------------------|-----------------------------------|-------------------------------------------------------------------------|
| 12,18-22,25-27,29-33,36-38,45-51,53,56-59,61-63,70,71 | 12,18-20,21-26,27,29-32,35,36,40,41,43,45,49,50,52,53,56-59,62,63,65,72,79 | 12,18-27,29-41,43-65,67-71,74-76-79,82-85,89,90 | 18,20-25,27,29,32,33,35-38,40,41,43,45,47-50,52,53,56,59,62,63,70,83,85,89,90 | 12,18-21,22,24-27,29,31,32,36,37,39-41,43-45,49,54-58,60-63,70,83,85 | 18-27,29,30,32,36,38,41,45-47,49-51,53-85,89 | 12,18-22,24-27,29-41,43-45,47-51,53-59,61-63,65,67-70,74,76,79,83-85,89,90 | 12,18-22,26,27,29,31,32,34,40,43,44,46,48-50,53,54,56-63,65,67-71,74,75,77,79,83-86,89,90 | 18-20,22,24-27,29,30,32,34-41,43-51,55-60,62,63,65,67,70,71,74,83,85,89,90 | 12,18-21,23,25-27,29,32,36-39,45,48,49,57-62,71,85,89 | 18,20,22,24,25,27,30,62,71,85,89 | 19,20,22,25-41,43-46,50,51,53,55,56,58-60,62,64,67-71,74,83,85,87,89 | 12,18-20,22,23,25-41,44-50,52,53,55,56,58-67,69-71,74-76-79,83,84,87-90 | 20,22,24,26,29,39,79,84           | 12,18-27,29,30,32,34,35-40,47-50,52,53,56,57,59,60,62,63,65,69,70,83-85 |

1  
2  
3  
4  
5  
6  
7  
8  
9  
10  
11  
12  
13  
14  
15  
16  
17  
18  
19  
20  
21  
22  
23  
24  
25  
26  
27  
28  
29  
30  
31  
32  
33  
34  
35  
36  
37  
38  
39  
40  
41  
42  
43  
44  
45  
46  
47  
48  
49

Table 4: The data-items collected by the majority of UK surgical registries

| Pre-operative                            | Operative                                 | Post-operative                     |
|------------------------------------------|-------------------------------------------|------------------------------------|
| Name of centre                           | Name of operation                         | Outcome data specific to operation |
| Patient identifier                       | Time to surgery from first appointment    | QOL/PRO outcome measure            |
| Patient demographics                     | Type of anaesthetic (local or general)    | Date of discharge                  |
| Patient co-morbidities                   | ASA grade                                 | Length of stay                     |
| Whether discussed at MDT meeting         | Thromboprophylaxis regimen                | Complications                      |
| Indication for surgery                   | Primary or revision case                  | Morbidity                          |
| Date of diagnosis                        | Elective or emergency surgery             | Mortality (and cause)              |
| Pre-operative investigations and results | Date of surgery                           | Dates of follow-up                 |
| Date of admission                        | In or out of regular hospital hours       | Follow-up outcomes                 |
| GP information                           | Site/side of surgery                      | Need for further treatment         |
|                                          | Surgical technique/approach               | Need for further surgery           |
|                                          | Difficulty of procedure                   | ITU admission (planned/unplanned)  |
|                                          | Intraoperative problems                   | Destination of discharge           |
|                                          | Date of consent                           |                                    |
|                                          | Grade of surgeon                          |                                    |
|                                          | Surgical time                             |                                    |
|                                          | Funding for operation (NHS/private)       |                                    |
|                                          | Use of antibiotics                        |                                    |
|                                          | Type of implant and implant serial number |                                    |

GP General Practitioner, MDT multidisciplinary team, ASA American Society of Anaesthesiologists, QOL quality of life, PRO patient reported outcome, ITU intensive therapy unit

APPENDIX 1

1  
2  
3  
4  
5  
6  
7  
8  
9  
10  
11  
12  
13  
14  
15  
16  
17  
18  
19  
20  
21  
22  
23  
24  
25  
26  
27  
28  
29  
30  
31  
32  
33  
34  
35  
36  
37  
38  
39  
40  
41  
42  
43  
44  
45  
46  
47  
48  
49

| A                                                                | B                                                                                                                                  | C    | D                                                                     | E                                                | F              | G                                                                                      | H                                                                                                                                                                                                                                            | I                               | J                                                                                                                                                                                                                                                                        | K                                                                                                                                                                                                                                                                                      | L                                                                                                                                                                                                                                                                                                                                                                                                                                                          | M                                                                 | N                                                                                                                                                                                                                                                                                                                                                                                                                                                                                               | O                                                                                                                                                                                                                                                                                                                                                                                                                                                         | P              | Q                                        | R                                   | S                      | T                                | U                                                                     |
|------------------------------------------------------------------|------------------------------------------------------------------------------------------------------------------------------------|------|-----------------------------------------------------------------------|--------------------------------------------------|----------------|----------------------------------------------------------------------------------------|----------------------------------------------------------------------------------------------------------------------------------------------------------------------------------------------------------------------------------------------|---------------------------------|--------------------------------------------------------------------------------------------------------------------------------------------------------------------------------------------------------------------------------------------------------------------------|----------------------------------------------------------------------------------------------------------------------------------------------------------------------------------------------------------------------------------------------------------------------------------------|------------------------------------------------------------------------------------------------------------------------------------------------------------------------------------------------------------------------------------------------------------------------------------------------------------------------------------------------------------------------------------------------------------------------------------------------------------|-------------------------------------------------------------------|-------------------------------------------------------------------------------------------------------------------------------------------------------------------------------------------------------------------------------------------------------------------------------------------------------------------------------------------------------------------------------------------------------------------------------------------------------------------------------------------------|-----------------------------------------------------------------------------------------------------------------------------------------------------------------------------------------------------------------------------------------------------------------------------------------------------------------------------------------------------------------------------------------------------------------------------------------------------------|----------------|------------------------------------------|-------------------------------------|------------------------|----------------------------------|-----------------------------------------------------------------------|
| Author                                                           | Title                                                                                                                              | Year | Name of registry/type of paper                                        | Type of surgery                                  | Collaborations | Registry leadership and management                                                     | Objective(s)                                                                                                                                                                                                                                 | Registry development and design | Funding                                                                                                                                                                                                                                                                  | Rationale behind dataset                                                                                                                                                                                                                                                               | Dataset                                                                                                                                                                                                                                                                                                                                                                                                                                                    | Data processing                                                   | Strategies to increase data completion                                                                                                                                                                                                                                                                                                                                                                                                                                                          | Data completeness                                                                                                                                                                                                                                                                                                                                                                                                                                         | Data reporting | Patient involvement                      | Difficulties encountered/challenges | Benefits of registries | Measure of a successful registry | Legal factors, ethics and data access                                 |
| Gabr A.<br>O'Leary S.<br>Spalding T.<br>Bollen S.<br>Haddad F.   | The UK National Ligament Registry Report 2015                                                                                      | 2015 | UK National Ligament Registry (NLR)                                   | Anterior cruciate ligament reconstruction (ACLR) | NS             | Steering committee group comprising of surgeons - no initial involvement of government | To collect relevant demographic data, identify current or emergent trends in practice, identify failing techniques/devices at the earliest opportunity, provide functional outcome data and complication rates, improve the standard of care | Web based platform              | Involving physical therapists with enrich dataset. Industry (£ companies, priming grant from British Association for Knee Surgery (BASK) - Industry will be provided with information on the performance of their products. They will not be able to access the raw data | Need to have a balance between level of ideal data and what surgeons and patients can easily submit. The data set allows comparison and communication with existing registries as well as allowing potential 'generic health benefit' comparisons with other non-orthopedic procedures | Demographics, cause of injury, time from injury to surgery; graft data (type of graft, diameter), BMI, surgical technique; outcome data relating to ACLR knee injury and osteoarthritis outcome score, subjective International Knee Documentation Committee, Euroqol (EQ5D) and the Tegner activity score, in which centre procedure performed.                                                                                                           | NS                                                                | User-friendly web based platform - easily accessible via computer or tablet, simplifying the process for clinicians and patients; Has a registry 'route' - requiring small contributions from patients and surgeons at different stages; Has automatic prompts for patients to fill in their information at scheduled times of treatment and rehabilitation, taking the hassle and stress out of clinical data collection for clinicians; Readymade tool for use in governance and revalidation | 17,800 completed forms, 2854 ACLR procedures registered between Dec 2012 and Feb 2015. Estimated that there are 30,000 patients a year in the UK undergoing ACLR                                                                                                                                                                                                                                                                                          | NS             | Patients can insert data via apps        | NS                                  | NS                     | NS                               | May be useful to introduce mobile apps for surgeons use to enter data |
| Hing C.B.<br>Stiehl J.B.                                         | Editorial                                                                                                                          | 2015 | Commentary                                                            | NS                                               | NS             | NS                                                                                     | NS                                                                                                                                                                                                                                           | NS                              | NS                                                                                                                                                                                                                                                                       | NS                                                                                                                                                                                                                                                                                     | NS                                                                                                                                                                                                                                                                                                                                                                                                                                                         | Registries rely on accurate robust data entry and correct support | NS                                                                                                                                                                                                                                                                                                                                                                                                                                                                                              | NS                                                                                                                                                                                                                                                                                                                                                                                                                                                        | NS             | NS                                       | NS                                  | NS                     | NS                               | NS                                                                    |
| Briggs V.<br>Pitcher D.<br>Braddon F.<br>Fogarty D.<br>Wilkie M. | UK renal registry 15th annual report; Chapter 8 UK multisite peritoneal dialysis access catheter audit for first PD catheters 2011 | 2011 | UK renal registry Multisite peritoneal dialysis access catheter audit | Peritoneal dialysis access.                      | NS             | NS                                                                                     | Data acquisition relating to peritoneal dialysis functionality and access                                                                                                                                                                    | NS                              | Health quality improvement partnership (HQIIP)                                                                                                                                                                                                                           | Data fields were refined from existing renal registry tables. Data fields were adjusted based on meetings with a multisite audit group including patient representation.                                                                                                               | Demographic data, age at first dialysis of each centre, size of centre, referral time/interval, underlying disease, catheter insertion technique, referral time, commencement date of dialysis, deprivation quintiles, catheter survival at 3 months, length of time known to nephrology service, date catheter used, date of catheter failure, BMI, date seen by renal physician, surgical referral, peritoneal dialysis catheter outcomes, complications | Excel spreadsheets circulated by the UK renal registry.           | NS                                                                                                                                                                                                                                                                                                                                                                                                                                                                                              | 43/65 centres contacted submitted data. Data completeness by center ranged from 0% to 100% for almost all data fields that were collected. Data RE: underlying renal disease not available for 13% of patients. Data not available from some renal networks RE referral time; "considerable missing data" RE surgical referral. Missing data RE insertion technique in 37 patients. Missing data in 209/916 patients RE whether or not they were diabetic | NS             | Patient involved in refining data fields | NS                                  | NS                     | NS                               |                                                                       |

1  
2  
3  
4  
5  
6  
7  
8  
9  
10  
11  
12  
13  
14  
15  
16  
17  
18  
19  
20  
21  
22  
23  
24  
25  
26  
27  
28  
29  
30  
31  
32  
33  
34  
35  
36  
37  
38  
39  
40  
41  
42  
43  
44  
45  
46  
47  
48  
49

|                                                              |                                                                                                                                                                                                     |      |                                                    |                                          |    |    |                                                                                                         |    |       |    |                                                                                                                                                                                                                                            |                                                                                                                               |                                                                                                                                                    |                                                                                                                      |    |    |                                                                                                                                                                                                                         |                                                                                                                                                                           |    |    |
|--------------------------------------------------------------|-----------------------------------------------------------------------------------------------------------------------------------------------------------------------------------------------------|------|----------------------------------------------------|------------------------------------------|----|----|---------------------------------------------------------------------------------------------------------|----|-------|----|--------------------------------------------------------------------------------------------------------------------------------------------------------------------------------------------------------------------------------------------|-------------------------------------------------------------------------------------------------------------------------------|----------------------------------------------------------------------------------------------------------------------------------------------------|----------------------------------------------------------------------------------------------------------------------|----|----|-------------------------------------------------------------------------------------------------------------------------------------------------------------------------------------------------------------------------|---------------------------------------------------------------------------------------------------------------------------------------------------------------------------|----|----|
| Divacha H.M.<br>Siddique I.<br>Breakwell L.M.<br>Milner P.A. | Complications in spinal deformity surgery in the united kingdom. Five year results of the annual british scoliosis society national audit of morbidity & mortality                                  | 2014 | British Scoliosis Society                          | Spinal deformity surgeries               | NS | NS | Provide an overview of corrective spinal deformity surgery including case volume and complication rates | NS | NS    | NS | Aetiological and outcome data. Number of surgeries performed, demographics, aetiology (idiopathic vs non-idiopathic), complications (mortality, deep infections, neurological deficit), in which centre procedure performed                | Individual units were approached on an annual basis and asked to submit data (voluntarily). Data was submitted electronically | It may be necessary to make it mandatory to submit morbidity and mortality data to ensure accurate, representative and nationwide data collection. | 82% of centres (51 centres). The number of contributing units and cases increased yearly throughout the study period | NS | NS | Relied on voluntary data submission by individual centres leading to potential reporting bias where complication rates could be underestimated.                                                                         | Help when consenting patients in terms of complication rates. Help provide a benchmark for units in the UK to compare their complication rates against national averages. | NS | NS |
| Briggs V.<br>Pitcher D.<br>Shaw C.<br>Fluck R.<br>Wilkie M.  | UK renal registry 16th annual report. Chapter 14 2012 multistate dialysis access audit in England, Northern Ireland and Wales and 2011 PD one year follow-up: National and centre-specific analyses | 2012 | UK renal registry Multistate dialysis access audit | Vascular and peritoneal dialysis access. | NS | NS | Examine practice patterns of dialysis access and highlight variations in practice between renal centres | NS | HQUIP | NS | Patient demographics, details of access failure, type of access, first access type used, insertion technique, referral time, type of renal disease, whether pt had surgical assessment, in which centre access was obtained, complications | Excel spreadsheets circulated by the UK renal registry.                                                                       | NS                                                                                                                                                 | 51/62 centres                                                                                                        | NS | NS | Data collection was not optimal with significant amounts of missing information across range of data fields. There were ambiguities in data fields which need to be refined to simplify collection and improve accuracy | NS                                                                                                                                                                        | NS | NS |

For peer review only

1  
2  
3  
4  
5  
6  
7  
8  
9  
10  
11  
12  
13  
14  
15  
16  
17  
18  
19  
20  
21  
22  
23  
24  
25  
26  
27  
28  
29  
30  
31  
32  
33  
34  
35  
36  
37  
38  
39  
40  
41  
42  
43  
44  
45  
46  
47  
48  
49

|                                                                                                                                                                                                                                                                                                                                                                              |                                                                                                                                                            |          |                                                                                                                           |                                                                                                       |                                                                                                                                                                              |                                                                                                                                                                                                                                                                                                                                                                                                                                                                                    |                                                                                                                                                                                                                                                                                                                                                                                                                                                                                                                                                                                                                                                                                                                                                                                                                              |                                                                                                                                                                                                                                                                                                                                                                                                                                                                                                                                                                                                                                                                                                                                                           |                                                                                                                                                                                                                                                                                                                                                                                                                                                                                                                                                                                                                                        |                                                                                                                                                                                                                                                                                                                                                                                                                                                                                                                                                                                                                                    |                                                                                                                                                                                                                                                                                                                                                                                                                                                                                                                                                                                                                                                                                                                                                                                                                                                                                                                                                                                                                                                                                                                                                                                                                                                                                                                                                                                                        |                                                                                                                                                                                                                                                                                                                                                                                                                                                                                                                                                                                      |    |                |                                                                                                                                                                                                                                                                                                                          |    |    |    |    |                                                                                                                                                                                                                                                                                                                                            |
|------------------------------------------------------------------------------------------------------------------------------------------------------------------------------------------------------------------------------------------------------------------------------------------------------------------------------------------------------------------------------|------------------------------------------------------------------------------------------------------------------------------------------------------------|----------|---------------------------------------------------------------------------------------------------------------------------|-------------------------------------------------------------------------------------------------------|------------------------------------------------------------------------------------------------------------------------------------------------------------------------------|------------------------------------------------------------------------------------------------------------------------------------------------------------------------------------------------------------------------------------------------------------------------------------------------------------------------------------------------------------------------------------------------------------------------------------------------------------------------------------|------------------------------------------------------------------------------------------------------------------------------------------------------------------------------------------------------------------------------------------------------------------------------------------------------------------------------------------------------------------------------------------------------------------------------------------------------------------------------------------------------------------------------------------------------------------------------------------------------------------------------------------------------------------------------------------------------------------------------------------------------------------------------------------------------------------------------|-----------------------------------------------------------------------------------------------------------------------------------------------------------------------------------------------------------------------------------------------------------------------------------------------------------------------------------------------------------------------------------------------------------------------------------------------------------------------------------------------------------------------------------------------------------------------------------------------------------------------------------------------------------------------------------------------------------------------------------------------------------|----------------------------------------------------------------------------------------------------------------------------------------------------------------------------------------------------------------------------------------------------------------------------------------------------------------------------------------------------------------------------------------------------------------------------------------------------------------------------------------------------------------------------------------------------------------------------------------------------------------------------------------|------------------------------------------------------------------------------------------------------------------------------------------------------------------------------------------------------------------------------------------------------------------------------------------------------------------------------------------------------------------------------------------------------------------------------------------------------------------------------------------------------------------------------------------------------------------------------------------------------------------------------------|--------------------------------------------------------------------------------------------------------------------------------------------------------------------------------------------------------------------------------------------------------------------------------------------------------------------------------------------------------------------------------------------------------------------------------------------------------------------------------------------------------------------------------------------------------------------------------------------------------------------------------------------------------------------------------------------------------------------------------------------------------------------------------------------------------------------------------------------------------------------------------------------------------------------------------------------------------------------------------------------------------------------------------------------------------------------------------------------------------------------------------------------------------------------------------------------------------------------------------------------------------------------------------------------------------------------------------------------------------------------------------------------------------|--------------------------------------------------------------------------------------------------------------------------------------------------------------------------------------------------------------------------------------------------------------------------------------------------------------------------------------------------------------------------------------------------------------------------------------------------------------------------------------------------------------------------------------------------------------------------------------|----|----------------|--------------------------------------------------------------------------------------------------------------------------------------------------------------------------------------------------------------------------------------------------------------------------------------------------------------------------|----|----|----|----|--------------------------------------------------------------------------------------------------------------------------------------------------------------------------------------------------------------------------------------------------------------------------------------------------------------------------------------------|
| Kolias A.G.<br>Bulters D.O.<br>Cowie C.J.<br>Wilson M.H.<br>Afshari F.T.<br>Helmy A.<br>Broughton E.<br>Joannides A.J.<br>Zebian B.<br>Harrison S.E.<br>Hill C.S.<br>Ahmed A.I.<br>Barone D.G.<br>Thakur B.<br>McMahon C.J.<br>Adlam D.M.<br>Bentley R.P.<br>Tollas C.M.<br>Mitchell P.M.<br>Whitfield P.C.<br>Critchley G.R.<br>Belli A.<br>Brennan P.M.<br>Hutchinson P.J. | Proposal for establishment of the UK cranial reconstruction registry (UKCRR)<br><br>Proposal for the establishment of a UK cranial reconstruction registry | 201<br>4 | UK Cranial reconstruction registry (UKCRR).<br><br>Proposal for the establishment of a UK cranial reconstruction registry | Cranioplasty. Reconstruction of the skull vault with autologous bone, titanium or synthetic material. | British Neurotrauma Group, the British Neurosurgical Trainee Research Collaborative (BNTRC), the UK Neurosurgical Research Network, Society of British Neurological Surgeons | Each participating unit will appoint a consultant and a trainee responsible for co-ordinating the UKCRR at a local level. The UKCRR Steering Committee will have the overall responsibility for oversight of the registry. Steering Committee meetings to assess progress will take place at 6 and 12 months after the national rollout. A Steering Committee, which will include stakeholders will be responsible for overseeing the strategic direction and running of the UKCRR | To monitor practice patterns, complication rates and establish benchmarks for future studies. To provide information on variations in practice and outcomes between different units. To generate hypotheses for future research studies. Ultimate aim is to improve outcomes for patients. Specific objectives of the UKCRR are to: Monitor the demography, contemporary practice patterns, long-term clinical outcome and complication rates of cranioplasties across the UK. 2) Collect PROMs with a special focus on functional outcome, quality of life and satisfaction with cosmesis. 3) Provide aggregate data of implant usage and lifespan (implant survival) for long-term surveillance to manufacturers (commercial and in-house), clinicians, healthcare planners, regulatory authorities and other stakeholders | The UKCRR will be developed under the auspices of the British Neurotrauma Group (a special interest group of the Society of British Neurological Surgeons), the British Neurosurgical Trainee Research Collaborative (BNTRC) and the UK Neurosurgical Research Network. The registry will operate under the umbrella of the National Audit Programme of the Society of British Neurological Surgeons. The feasibility of prospective data collection will be piloted in a number of selected units to refine the dataset on user experience and feedback. The pilot phase is expected to last 2-3 months. The principles of the UKCRR were discussed and agreed during past meetings of the British Neurotrauma Group and the launch meeting of the BNTRC | Cost of development and maintenance to be met by participating hospitals with steering committee. Well established and validated patient reported questionnaires will be used. For QOL, they propose to use the EQ-5D - a validated, non-disease-specific instrument which measures health-related quality of life and health status - its use is recommended by the National Institute of Neurological Disorders. A PROM focussing on satisfaction with cosmesis post-cranioplasty does not currently exist. Authors intend to develop and validate an appropriate instrument in partnership with patients and patient support groups | Dataset agreed during previous meetings with stakeholders and overseen by steering committee. Well established and validated patient reported questionnaires will be used. For QOL, they propose to use the EQ-5D - a validated, non-disease-specific instrument which measures health-related quality of life and health status - its use is recommended by the National Institute of Neurological Disorders. A PROM focussing on satisfaction with cosmesis post-cranioplasty does not currently exist. Authors intend to develop and validate an appropriate instrument in partnership with patients and patient support groups | Demographics, indication for craniectomy, site of skin incision, material used for duroplasty, type of material laid over the brain, time interval between craniectomy and cranioplasty, comorbidities, ASA class, neurological status, PROMs (functional outcome, quality of life, satisfaction with cosmesis). Operative data including: number of surgeons, grade of most senior surgeon, morning or afternoon operating list, size of cranial defect, site of cranioplasty, type of cranioplasty (including material, design and manufacturing), simultaneous insertion of CSF shunt (if applicable), surgical time, antibiotic prophylaxis, conventional or laminar flow ventilation theatre, wound infiltration with local anaesthetic, type of antiseptic used for skin preparation, distance of brain surface from inner table of skull, part of implant placed under temporalis (if applicable), method used to secure implant, insertion of wound drain (suction or passive) and method for closing wound. Outcome measures: Re-operation due to a cranioplasty-related issue, surgical site infection, re-admission due to a cranioplasty-related issue, unplanned post-operative escalation of care, morbidity, length of stay, destination at discharge, mortality, neurological status, PROMs (functional outcome, quality of life, satisfaction with cosmesis) during routine follow-up | The elective waiting list and/or other clinical management systems will be used for the identification of eligible patients. Data will be submitted by members of the local clinical team to the Outcome Registry Intervention and Operation Network (ORION) secure online platform, which already hosts the national vestibular schwannoma registry, national paediatric epilepsy surgery database and the UK chronic subdural haematoma audit. UKCRR Steering Committee in partnership with the ORION will be responsible for central processing and validation of anonymised data | NS | Not active yet | Annual reports including a summary of cranioplasties (material, time interval after craniectomy, patient characteristics), outcomes post cranioplasty, description of key outcome indicators (i.e. risk-adjusted re-operation and surgical site infection) at unit level, description of data completeness at unit level | NS | NS | NS | NS | The ORION platform complies with the Department of Health Information Governance policies and standards for secure processing of patient healthcare data as set out in the Information Governance Toolkit of the Health and Social Care Information Centre. Each participating unit will be the data controller for its own submitted data |
|------------------------------------------------------------------------------------------------------------------------------------------------------------------------------------------------------------------------------------------------------------------------------------------------------------------------------------------------------------------------------|------------------------------------------------------------------------------------------------------------------------------------------------------------|----------|---------------------------------------------------------------------------------------------------------------------------|-------------------------------------------------------------------------------------------------------|------------------------------------------------------------------------------------------------------------------------------------------------------------------------------|------------------------------------------------------------------------------------------------------------------------------------------------------------------------------------------------------------------------------------------------------------------------------------------------------------------------------------------------------------------------------------------------------------------------------------------------------------------------------------|------------------------------------------------------------------------------------------------------------------------------------------------------------------------------------------------------------------------------------------------------------------------------------------------------------------------------------------------------------------------------------------------------------------------------------------------------------------------------------------------------------------------------------------------------------------------------------------------------------------------------------------------------------------------------------------------------------------------------------------------------------------------------------------------------------------------------|-----------------------------------------------------------------------------------------------------------------------------------------------------------------------------------------------------------------------------------------------------------------------------------------------------------------------------------------------------------------------------------------------------------------------------------------------------------------------------------------------------------------------------------------------------------------------------------------------------------------------------------------------------------------------------------------------------------------------------------------------------------|----------------------------------------------------------------------------------------------------------------------------------------------------------------------------------------------------------------------------------------------------------------------------------------------------------------------------------------------------------------------------------------------------------------------------------------------------------------------------------------------------------------------------------------------------------------------------------------------------------------------------------------|------------------------------------------------------------------------------------------------------------------------------------------------------------------------------------------------------------------------------------------------------------------------------------------------------------------------------------------------------------------------------------------------------------------------------------------------------------------------------------------------------------------------------------------------------------------------------------------------------------------------------------|--------------------------------------------------------------------------------------------------------------------------------------------------------------------------------------------------------------------------------------------------------------------------------------------------------------------------------------------------------------------------------------------------------------------------------------------------------------------------------------------------------------------------------------------------------------------------------------------------------------------------------------------------------------------------------------------------------------------------------------------------------------------------------------------------------------------------------------------------------------------------------------------------------------------------------------------------------------------------------------------------------------------------------------------------------------------------------------------------------------------------------------------------------------------------------------------------------------------------------------------------------------------------------------------------------------------------------------------------------------------------------------------------------|--------------------------------------------------------------------------------------------------------------------------------------------------------------------------------------------------------------------------------------------------------------------------------------------------------------------------------------------------------------------------------------------------------------------------------------------------------------------------------------------------------------------------------------------------------------------------------------|----|----------------|--------------------------------------------------------------------------------------------------------------------------------------------------------------------------------------------------------------------------------------------------------------------------------------------------------------------------|----|----|----|----|--------------------------------------------------------------------------------------------------------------------------------------------------------------------------------------------------------------------------------------------------------------------------------------------------------------------------------------------|

|   |             |                                                                        |      |                                                                                                                               |                                                                     |                                                                                                                                                                                                                                                                                                                                                                             |                                                                                                                                                                                                                                                                                                                                                                                                                                                                                                                                              |    |                                                                                                                                                                                                                                                                                                                                                                                                                                                                                                                                                                                             |                                                                                                                                                                                                                                                                                                                                                                                                                                                                                                      |                                                                                                                                                                                                                                                                                                                                                                                                                                                                                                                                                                                                                                                                                          |                                                                                                                                                                                                                                                                                                                                                                                                                                                                                                                                                                                                                                                                                                                                                                                                                                                                                                                                                                                                                                                                                                                                                                                                   |                                                                                                                                                                                                                                                                                                                                                                                                                                                                                                                                                                                                                                                                                                                                                                                                                                                                    |                                                  |                                                                                                                                              |    |                                                                                                                                                                                                                                                         |                                                                                                                                                                                                                                                                                                                                                                                                                                                                                                                                                                                                                                                                                                                                                                                                                                                                                                                                                                                                                                                                                                                                                                                                                           |                                                                                                                                               |                                                                                                                                                                                                                                                                                                                                                                                                                                                                                                                                                                                                                                                                                                                                                                                                                                                                                                                       |
|---|-------------|------------------------------------------------------------------------|------|-------------------------------------------------------------------------------------------------------------------------------|---------------------------------------------------------------------|-----------------------------------------------------------------------------------------------------------------------------------------------------------------------------------------------------------------------------------------------------------------------------------------------------------------------------------------------------------------------------|----------------------------------------------------------------------------------------------------------------------------------------------------------------------------------------------------------------------------------------------------------------------------------------------------------------------------------------------------------------------------------------------------------------------------------------------------------------------------------------------------------------------------------------------|----|---------------------------------------------------------------------------------------------------------------------------------------------------------------------------------------------------------------------------------------------------------------------------------------------------------------------------------------------------------------------------------------------------------------------------------------------------------------------------------------------------------------------------------------------------------------------------------------------|------------------------------------------------------------------------------------------------------------------------------------------------------------------------------------------------------------------------------------------------------------------------------------------------------------------------------------------------------------------------------------------------------------------------------------------------------------------------------------------------------|------------------------------------------------------------------------------------------------------------------------------------------------------------------------------------------------------------------------------------------------------------------------------------------------------------------------------------------------------------------------------------------------------------------------------------------------------------------------------------------------------------------------------------------------------------------------------------------------------------------------------------------------------------------------------------------|---------------------------------------------------------------------------------------------------------------------------------------------------------------------------------------------------------------------------------------------------------------------------------------------------------------------------------------------------------------------------------------------------------------------------------------------------------------------------------------------------------------------------------------------------------------------------------------------------------------------------------------------------------------------------------------------------------------------------------------------------------------------------------------------------------------------------------------------------------------------------------------------------------------------------------------------------------------------------------------------------------------------------------------------------------------------------------------------------------------------------------------------------------------------------------------------------|--------------------------------------------------------------------------------------------------------------------------------------------------------------------------------------------------------------------------------------------------------------------------------------------------------------------------------------------------------------------------------------------------------------------------------------------------------------------------------------------------------------------------------------------------------------------------------------------------------------------------------------------------------------------------------------------------------------------------------------------------------------------------------------------------------------------------------------------------------------------|--------------------------------------------------|----------------------------------------------------------------------------------------------------------------------------------------------|----|---------------------------------------------------------------------------------------------------------------------------------------------------------------------------------------------------------------------------------------------------------|---------------------------------------------------------------------------------------------------------------------------------------------------------------------------------------------------------------------------------------------------------------------------------------------------------------------------------------------------------------------------------------------------------------------------------------------------------------------------------------------------------------------------------------------------------------------------------------------------------------------------------------------------------------------------------------------------------------------------------------------------------------------------------------------------------------------------------------------------------------------------------------------------------------------------------------------------------------------------------------------------------------------------------------------------------------------------------------------------------------------------------------------------------------------------------------------------------------------------|-----------------------------------------------------------------------------------------------------------------------------------------------|-----------------------------------------------------------------------------------------------------------------------------------------------------------------------------------------------------------------------------------------------------------------------------------------------------------------------------------------------------------------------------------------------------------------------------------------------------------------------------------------------------------------------------------------------------------------------------------------------------------------------------------------------------------------------------------------------------------------------------------------------------------------------------------------------------------------------------------------------------------------------------------------------------------------------|
| 1 | Hickey G.L. | Clinical registries: Governance, management, analysis and applications | 2013 | Review on establishing and managing registries. Uses many examples from National Adult Cardiac Surgery Audit (NACSA) registry | General review on registries but mainly focuses on cardiac registry | Stakeholders in NACSA registry, DoH commissioners, HQIP: The Healthcare Quality Improvement Partnership, SCTS (Society for Cardiothoracic Surgery in GB and Ireland), NICOR: National Institute for Cardiovascular Outcomes Research, NIGB: National Information Governance Board, Cardiac Surgery Centres, Surgeons, Database managers, Academic groups, Commercial groups | NACSA managed by National Institute of Cardiovascular Outcomes Research (NICOR). For NACSA database, most centres in the UK employ a local database manager who has responsibility for working with the surgeons to ensure that data collection is complete and robust. Database managers monitor data completeness rates and effective data management is a vital aspect of any large clinical registry. For registries to be effective, dedicated clinical input alongside high-level analytical and data management expertise is required | NS | Registries require considerable resources, infrastructure and funding to survive long term. Funding can come from: government budgets; professional societies; local health-care commissioner s. The value of the data can be exploited as a source of revenue. The Society of Thoracic Surgeons (STS) have identified two major or minor data requests and (ii) regional activities. The first source allows for researchers to access information from the database. The second would allow for regional governments to access high-quality reports in order to steer health-care policy. | Fewer participants and small datasets increase participation rates and data completeness. However if too small, not useful. A registry that can easily evolve to capture new data sources or fields is likely to be expensive and complicated, but one that is inflexible can become outdated. The first agreed dataset for the NACSA registry was in 1996 and revised in 2003 and 2010. Each revision required comprehensive communications with all contributors and external software developers. | The NACSA dataset has 168 data fields. Half the fields are 'branched', meaning that they are only relevant for specific procedures. Fields are classified into patient identifiers, patient characteristics, medical history, preoperative measurements, intraoperative fields and postoperative fields. Cardiac surgical procedures are categorized into four major groups: coronary artery bypass graft (CABG), valve, major aortic and other cardiothoracic procedures. Indication of a procedure within one of these groups unlocks further branched fields. For example, indicating a patient had a CABG procedure would unlock fields to allow completion of the number of grafts. | For NACSA: Data are collected through local specialised database systems developed either commercially or locally. The data remain in the individual centres for internal validation and local auditing. Data are then uploaded to central servers housed at NICOR. A sophisticated registry-import software tool flags data issues. Data are then merged into a single file structure and encrypted. Data then undergo central data cleaning and external validation. It is very important to be able to clean the data. Simply removing records or fields that do not fully meet standards of accuracy and coherency will lead to an increase in bias. Data cleaning is the process of detecting and resolving data problems to improve data quality. Appropriate resources must be allocated to this process, which will usually require the attention of experienced clinicians and database managers. Data validation is important to ensure that the data are accurate for reporting. Following local and external validation, summaries of centre- and surgeon-specific data are returned to individual centres for validation. Following this, data can be released to the public domain. | Achieving and maintaining high participation rates rely heavily on the perceived value of the outputs generated. Keep the registry simple - as the number of records, data fields and complexity of the registry increases, the quality of the data decreases. Have comprehensive 'user guides' for contributors, technical and clinical helpdesks, training, feedback mechanisms and communication plans. Problems most commonly occur at the data input stage. Data inputted using handwritten data-forms are more likely to contain inaccurate information than software systems that capture the required dataset. Human error can also lead to data extractions for researchers being unknowingly corrupted. For example variables that list multiple options separated by a marker might be arbitrarily truncated, meaning that not all data are transmitted | The NACSA database contains over 450,000 records | Publishing mortality results by named centre/surgeon might encourage risk-averse clinical decision-making. However evidence is inconclusive. | NS | Examples of errors from NACSA include patients who have their heights recorded as negative values (e.g. -160cm), procedures on five valves, deceased patients being discharged home and aortic root replacements being performed on the abdominal aorta | Improves quality of patient care, underpins research, improves cost-effectiveness, provides information for regulatory process. Other benefits include improvements in informed patient decision making, improvements in treatment and advances in health-care research and governance. Since the NACSA registry was introduced, risk-adjusted in-hospital mortality in the UK has fallen by >50% despite more elderly and high-risk patients having surgery each year. It is increasingly accepted that the collection and feedback of data and publishing them openly is an effective way of driving quality improvement. Registries can be used for audit purposes, surgical epidemiology, clinical hypothesis testing, risk-prediction models (eg in cardiac surgery used to estimate short term mortality post surgery), epidemiological research, health services research (including variations in patient access to care), and identification of health care inequalities. Clinical registries are considered the gold standard of observational data. There have been an increasing number of devices implanted into patients. Registries would allow the earlier detection of unacceptable failure rates eg PIP | The success of a clinical registry project can be measured on the database completeness s, accessibility of information and proven usefulness | Essential for the registry to function within its legal framework. Failure to do so can be a terminal event for any registry with potential criminal or political repercussions. There have been conflicting legal views on the interpretation of UK laws for practice in health-care research which has frustrated a number of registry projects due to lack of legal clarification. There should be ethical use of data and appropriate intellectual property rights. Data privacy should be maintained and data should be protected. Patients' personal data should be accurately collected and stored securely and not shared without appropriate permissions. It is important that any release of data (including to third parties responsible for analysis or publication) is done under a defined data-sharing agreement, whereby the security, planned uses, control and fate of the data are clearly defined |
|---|-------------|------------------------------------------------------------------------|------|-------------------------------------------------------------------------------------------------------------------------------|---------------------------------------------------------------------|-----------------------------------------------------------------------------------------------------------------------------------------------------------------------------------------------------------------------------------------------------------------------------------------------------------------------------------------------------------------------------|----------------------------------------------------------------------------------------------------------------------------------------------------------------------------------------------------------------------------------------------------------------------------------------------------------------------------------------------------------------------------------------------------------------------------------------------------------------------------------------------------------------------------------------------|----|---------------------------------------------------------------------------------------------------------------------------------------------------------------------------------------------------------------------------------------------------------------------------------------------------------------------------------------------------------------------------------------------------------------------------------------------------------------------------------------------------------------------------------------------------------------------------------------------|------------------------------------------------------------------------------------------------------------------------------------------------------------------------------------------------------------------------------------------------------------------------------------------------------------------------------------------------------------------------------------------------------------------------------------------------------------------------------------------------------|------------------------------------------------------------------------------------------------------------------------------------------------------------------------------------------------------------------------------------------------------------------------------------------------------------------------------------------------------------------------------------------------------------------------------------------------------------------------------------------------------------------------------------------------------------------------------------------------------------------------------------------------------------------------------------------|---------------------------------------------------------------------------------------------------------------------------------------------------------------------------------------------------------------------------------------------------------------------------------------------------------------------------------------------------------------------------------------------------------------------------------------------------------------------------------------------------------------------------------------------------------------------------------------------------------------------------------------------------------------------------------------------------------------------------------------------------------------------------------------------------------------------------------------------------------------------------------------------------------------------------------------------------------------------------------------------------------------------------------------------------------------------------------------------------------------------------------------------------------------------------------------------------|--------------------------------------------------------------------------------------------------------------------------------------------------------------------------------------------------------------------------------------------------------------------------------------------------------------------------------------------------------------------------------------------------------------------------------------------------------------------------------------------------------------------------------------------------------------------------------------------------------------------------------------------------------------------------------------------------------------------------------------------------------------------------------------------------------------------------------------------------------------------|--------------------------------------------------|----------------------------------------------------------------------------------------------------------------------------------------------|----|---------------------------------------------------------------------------------------------------------------------------------------------------------------------------------------------------------------------------------------------------------|---------------------------------------------------------------------------------------------------------------------------------------------------------------------------------------------------------------------------------------------------------------------------------------------------------------------------------------------------------------------------------------------------------------------------------------------------------------------------------------------------------------------------------------------------------------------------------------------------------------------------------------------------------------------------------------------------------------------------------------------------------------------------------------------------------------------------------------------------------------------------------------------------------------------------------------------------------------------------------------------------------------------------------------------------------------------------------------------------------------------------------------------------------------------------------------------------------------------------|-----------------------------------------------------------------------------------------------------------------------------------------------|-----------------------------------------------------------------------------------------------------------------------------------------------------------------------------------------------------------------------------------------------------------------------------------------------------------------------------------------------------------------------------------------------------------------------------------------------------------------------------------------------------------------------------------------------------------------------------------------------------------------------------------------------------------------------------------------------------------------------------------------------------------------------------------------------------------------------------------------------------------------------------------------------------------------------|



1  
2  
3  
4  
5  
6  
7  
8  
9  
10  
11  
12  
13  
14  
15  
16  
17  
18  
19  
20  
21  
22  
23  
24  
25  
26  
27  
28  
29  
30  
31  
32  
33  
34  
35<sup>10</sup>  
36  
37  
38  
39  
40  
41  
42  
43  
44  
45  
46  
47  
48  
49

|               |                                                                                                                                             |      |                                                                 |                  |                                                                                                                                                                                                                                                                                                                        |    |                                                                                                                                                                                                                                               |    |    |                                                                                                                                                       |                                                                                                                                                                                                                                                                                                                                                                            |                                                  |                                                                                                                                   |    |    |    |    |                                                                                                                                                                                                                                                                                                                                                             |                                                                                                                                                                                                                                                                                                                                                                                                                                                                                                                                                                                                                                                                  |    |    |
|---------------|---------------------------------------------------------------------------------------------------------------------------------------------|------|-----------------------------------------------------------------|------------------|------------------------------------------------------------------------------------------------------------------------------------------------------------------------------------------------------------------------------------------------------------------------------------------------------------------------|----|-----------------------------------------------------------------------------------------------------------------------------------------------------------------------------------------------------------------------------------------------|----|----|-------------------------------------------------------------------------------------------------------------------------------------------------------|----------------------------------------------------------------------------------------------------------------------------------------------------------------------------------------------------------------------------------------------------------------------------------------------------------------------------------------------------------------------------|--------------------------------------------------|-----------------------------------------------------------------------------------------------------------------------------------|----|----|----|----|-------------------------------------------------------------------------------------------------------------------------------------------------------------------------------------------------------------------------------------------------------------------------------------------------------------------------------------------------------------|------------------------------------------------------------------------------------------------------------------------------------------------------------------------------------------------------------------------------------------------------------------------------------------------------------------------------------------------------------------------------------------------------------------------------------------------------------------------------------------------------------------------------------------------------------------------------------------------------------------------------------------------------------------|----|----|
| De Sleur W.O. | Common data items in seven European oesophagogastric cancer surgery registries: Towards a European Upper GI cancer audit (EURECCA Upper GI) | 2014 | European Registration of Cancer Care (EURECCA) Upper GI Project | Upper GI Surgery | European Society for Surgical Oncology (ESSO) and the European Network of Excellence on gastric and oesophagogastric junction cancer (ELINE). Several European national and regional oesophagogastric cancer registries, countries involved: Denmark, France, Ireland, the Netherlands, Poland, Sweden, United Kingdom | NS | To compare the datasets used by the seven participating European oesophagogastric cancer registries and audits and to identify a list of common items. This core dataset can be used for future collaboration in the EURECCA Upper GI project | NS | NS | This study looked at data item lists from all seven participating Upper GI cancer registries, and then developed a core dataset based on shared items | By comparing the datasets of the 7 participating registries, 46 items were identified as shared items for a core dataset. The items were categorized into the following subgroups: patient administrative/medical condition, staging/diagnostics, neoadjuvant treatment, surgery, postoperative course/complications, pathology, adjuvant treatment and survival/follow up | Validity of self-reported data should be checked | The EURECCA Upper GI project provides participating teams with the opportunity to benchmark their performance on a European level | NS | NS | NS | NS | Not all European countries could participate because of limited availability of national/regional registries and audits. Definitions for postoperative complications differ among countries. In order to compare the data from the different registries, agreement has to be obtained concerning the definition of all complications used in the registries | Using the European Upper GI core dataset, differences in treatment patterns can be identified and linked to outcome measures such as morbidity, mortality, and surgical margins. The dataset offers enough patient data to perform statistical corrections for patient- and tumour factors, necessary for a fair comparison between different treatment strategies. Collective data may answer questions concerning the optimal treatment for elderly patients, which are often excluded from randomized trials, but in daily practice form a significant proportion of the patient population with oesophagogastric cancer                                      | NS | NS |
| Sessler D.I.  | Big Data - And its contributions to peri-operative medicine                                                                                 | 2014 | Commentary on benefits and uses of registry data                | NS               | NS                                                                                                                                                                                                                                                                                                                     | NS | NS                                                                                                                                                                                                                                            | NS | NS | NS                                                                                                                                                    | NS                                                                                                                                                                                                                                                                                                                                                                         | NS                                               | NS                                                                                                                                | NS | NS | NS | NS | NS                                                                                                                                                                                                                                                                                                                                                          | Increase reliability of data. With sufficient patients it is possible to study rare diseases, accurately evaluate 'hard' outcomes such as mortality, and generate appropriate comparison groups for case-control and retrospective cohort studies. Registry analyses can be conducted quickly and at modest cost. Registry data can be used for: 1) case-control and retrospective cohort studies; 2) health services research; 3) quality assessment; and 4) modelling for and conduct of prospective studies. Registry data will help physicians, epidemiologists and health policy experts to make data-driven decisions that will ultimately improve patient | NS | NS |

care.

1  
2  
3  
4  
5  
6  
7  
8  
9  
10  
11  
12  
13  
14  
15  
16  
17  
18  
19  
20  
21  
22  
23  
24  
25  
26  
27  
28  
29  
30  
31  
32  
33  
34  
35  
36  
37  
38  
39  
40  
41  
42  
43  
44  
45  
46  
47  
48  
49

|                                                                                                        |                                                                                                                                                                                                                               |      |                                                                              |                 |                                                                                                                                                                                                                     |    |                                                                                                                                                                                                                             |                                                                                                                                                                                                                                                                                  |       |                                                                       |                                                                                                                                      |                                                                                                                                                                                                                                                                                                                                                                                                                                                                                                                                                                                                                                                                                                                                                                                                                                                                                            |                                                                                                                     |                                                                                                                                                                                                                                                                                                                                                                                                                                                                                                                                                                                                                                                                                                                                                                     |    |                                                                                                                                                                                |    |                                                                                                                                                                                                                                                                                                                                            |                                                                                                                                           |                                                                                                                                                                                                                                                                                 |    |
|--------------------------------------------------------------------------------------------------------|-------------------------------------------------------------------------------------------------------------------------------------------------------------------------------------------------------------------------------|------|------------------------------------------------------------------------------|-----------------|---------------------------------------------------------------------------------------------------------------------------------------------------------------------------------------------------------------------|----|-----------------------------------------------------------------------------------------------------------------------------------------------------------------------------------------------------------------------------|----------------------------------------------------------------------------------------------------------------------------------------------------------------------------------------------------------------------------------------------------------------------------------|-------|-----------------------------------------------------------------------|--------------------------------------------------------------------------------------------------------------------------------------|--------------------------------------------------------------------------------------------------------------------------------------------------------------------------------------------------------------------------------------------------------------------------------------------------------------------------------------------------------------------------------------------------------------------------------------------------------------------------------------------------------------------------------------------------------------------------------------------------------------------------------------------------------------------------------------------------------------------------------------------------------------------------------------------------------------------------------------------------------------------------------------------|---------------------------------------------------------------------------------------------------------------------|---------------------------------------------------------------------------------------------------------------------------------------------------------------------------------------------------------------------------------------------------------------------------------------------------------------------------------------------------------------------------------------------------------------------------------------------------------------------------------------------------------------------------------------------------------------------------------------------------------------------------------------------------------------------------------------------------------------------------------------------------------------------|----|--------------------------------------------------------------------------------------------------------------------------------------------------------------------------------|----|--------------------------------------------------------------------------------------------------------------------------------------------------------------------------------------------------------------------------------------------------------------------------------------------------------------------------------------------|-------------------------------------------------------------------------------------------------------------------------------------------|---------------------------------------------------------------------------------------------------------------------------------------------------------------------------------------------------------------------------------------------------------------------------------|----|
| Breakwell L.M.                                                                                         | Understanding the need for spinal registries: Lee Breakwell reviews the importance of registries in spinal research and explains why the British Association of Spinal Surgeons (BASS) has decided to set up its own registry | 2013 | Commentary on why and how the BASS decided set up the British Spine Registry | Spine           | Association of British Healthcare Industries (ABHI) has enabled listing of the majority of the available spinal implants. This enables access to data on usage and helps identify national outcomes                 | NS | To enable assessments of certain procedure types, and their outcome. To create a secure, comprehensive database, to allow individual surgeons and their teams to collect prospective data in a convenient and timely manner | A subcommittee was formed, led by a consultant spinal surgeon, to define the dataset and to create a tender process. Bluespier International was the successful company, and has worked with the BASS registry committee to design and launch the BSR on the Amplitude platform. | NS    | A subcommittee led by a consultant Spinal Surgeon defined the dataset | Demographics, indication, details of the presenting clinical symptoms, resulting operative data, type of spinal implants, PROMs data | NS                                                                                                                                                                                                                                                                                                                                                                                                                                                                                                                                                                                                                                                                                                                                                                                                                                                                                         | A web-based solution was developed, ensuring that all users could access the BSR wherever, and whenever they wished | Currently there are over 200 registered surgeons, and over 3,000 patients enrolled in the registry                                                                                                                                                                                                                                                                                                                                                                                                                                                                                                                                                                                                                                                                  | NS | Use of a patient portal for direct data input is recommended                                                                                                                   | NS | Disciplined data collection can result in improved patient care through identifying trends and early problems. Registries help the drive towards value based health care - increase quality whilst reducing costs. The societies will be for the first time able to create real-time accurate population data on spinal surgery in the UK. | NS                                                                                                                                        | To address data security - the BSR has been registered with the UK Information Commissioners Office, the Healthcare Quality Improvement Partnership, and the Record of Central Returns. In addition, NHS IT experts reviewed the security policies, and data storage technology |    |
| Hickey G.L.<br>Cosgriff R.<br>Grant S.W.<br>Cooper G.<br>Deanfield J.<br>Roxburgh J.<br>Bridgewater B. | A technical review of the United Kingdom National Adult Cardiac Surgery Governance Analysis 2008-11                                                                                                                           | 2014 | United Kingdom National Adult Cardiac Surgery Governance Analysis 2008-11    | Cardiac surgery | Society for Cardiothoracic Surgery in Great Britain and Ireland who contribute data to the SCTS database. National Institute for Cardiovascular Outcomes Research, UCL London. National Adult Cardiac Surgery Audit | NS | To give a technical review of the registry                                                                                                                                                                                  | NS                                                                                                                                                                                                                                                                               | HOUIP | NS                                                                    | Each record contains a hospital identifier code and a consultant GMC number.                                                         | Data entered locally by surgeons are validated by database managers prior to upload via a web-portal to NICOR. At this stage, further validation is performed according to logical rules. The data are then forwarded to an academic healthcare informatics department for data cleaning. Cleaning involves removing duplicate records, recoding transcriptional discrepancies and resolving clinical and temporal conflicts. The data cleaning is performed by the analyst responsible for the governance analysis in collaboration with surgeons and the audit manager. All cleaning is made reproducible by programming a series of scripts, which are updated following each new data extract. At this stage, and prior to analysis, data for the last 3 years are returned to each contributing hospital for local validation, and units update their records in the central registry | NS                                                                                                                  | Most missing data are resolved during the validation stages of the data transfer. SCTS has a policy for the handling of missing data. First, missing and conflicting data for in-hospital mortality status are backfilled and validated via record linkage to the Office for National Statistics (ONS) census database, which records details of all deaths in England and Wales. After all reasonable attempts to backfill these data, any remaining missing discharge status data are mapped to in-hospital death. For the final analysis dataset after backfilling discharge status data, in Scotland there were 0 (0.00% of Scottish records) missing discharge statuses; in Wales and Northern Ireland, there were 3 missing discharge statuses each (0.06 and | NS | Data is reported on both the base hospital and the responsible consultant surgeon. Risk-adjusted in-hospital mortality, length of stay, postoperative complications, morbidity | NS | NS                                                                                                                                                                                                                                                                                                                                         | Improve overall service quality, and enable pts to make a choice between providers. Increase public trust, identify underperforming units | NS                                                                                                                                                                                                                                                                              | NS |

1  
2  
3  
4  
5  
6  
7  
8  
9  
10  
11  
12  
13  
14  
15  
16  
17  
18  
19  
20  
21  
22  
23  
24  
25  
26  
27  
28  
29  
30  
31  
32  
33  
34  
35  
36  
37  
38  
39  
40  
41  
42  
43  
44  
45  
46  
47  
48  
49

|                                           |                                                                                                              |      |                          |                          |                                            |    |                                                                                                                                                                                                               |    |                                                                                                                                                                                                                   |                                                                                                                                                                                                                                                                                                                                                                                                                                                                                                                                                                                                                                                                                                                                                                                                                      |                                                                                                                                                                                                                                                                                                                                                                                                                                                               |    |                                                                                                                                                                                                                                                                                                                                                                                                                                         |                                                                               |    |                                                                                                                                                                                                                                                                                                                                                                                                                                                                                                                                        |                                                                                                                                                                                                                                                                                                                                                                                                               |                                                                                                                                                                                                                                                                                      |                                                                                                                                                                       |    |
|-------------------------------------------|--------------------------------------------------------------------------------------------------------------|------|--------------------------|--------------------------|--------------------------------------------|----|---------------------------------------------------------------------------------------------------------------------------------------------------------------------------------------------------------------|----|-------------------------------------------------------------------------------------------------------------------------------------------------------------------------------------------------------------------|----------------------------------------------------------------------------------------------------------------------------------------------------------------------------------------------------------------------------------------------------------------------------------------------------------------------------------------------------------------------------------------------------------------------------------------------------------------------------------------------------------------------------------------------------------------------------------------------------------------------------------------------------------------------------------------------------------------------------------------------------------------------------------------------------------------------|---------------------------------------------------------------------------------------------------------------------------------------------------------------------------------------------------------------------------------------------------------------------------------------------------------------------------------------------------------------------------------------------------------------------------------------------------------------|----|-----------------------------------------------------------------------------------------------------------------------------------------------------------------------------------------------------------------------------------------------------------------------------------------------------------------------------------------------------------------------------------------------------------------------------------------|-------------------------------------------------------------------------------|----|----------------------------------------------------------------------------------------------------------------------------------------------------------------------------------------------------------------------------------------------------------------------------------------------------------------------------------------------------------------------------------------------------------------------------------------------------------------------------------------------------------------------------------------|---------------------------------------------------------------------------------------------------------------------------------------------------------------------------------------------------------------------------------------------------------------------------------------------------------------------------------------------------------------------------------------------------------------|--------------------------------------------------------------------------------------------------------------------------------------------------------------------------------------------------------------------------------------------------------------------------------------|-----------------------------------------------------------------------------------------------------------------------------------------------------------------------|----|
|                                           |                                                                                                              |      |                          |                          |                                            |    |                                                                                                                                                                                                               |    |                                                                                                                                                                                                                   |                                                                                                                                                                                                                                                                                                                                                                                                                                                                                                                                                                                                                                                                                                                                                                                                                      | repository where necessary                                                                                                                                                                                                                                                                                                                                                                                                                                    |    | 0.11% of Welsh and Northern Irish records, respectively) and for England, there were 23 missing discharge statuses (0.02% of English records)                                                                                                                                                                                                                                                                                           |                                                                               |    |                                                                                                                                                                                                                                                                                                                                                                                                                                                                                                                                        |                                                                                                                                                                                                                                                                                                                                                                                                               |                                                                                                                                                                                                                                                                                      |                                                                                                                                                                       |    |
| Mangera A.<br>Pays B.                     | BAUS Section of Endourology national Ureterscopy audit. Setting the standards for revalidation               | 2013 | Audit of UK Ureterscopy  | Ureterscopy              | British Association of Urological Surgeons | NS | Aim is for this audit to develop into a registry                                                                                                                                                              | NS | Nil funding                                                                                                                                                                                                       | A consensus proforma was produced by the BAUS Section of Endourology to capture all necessary data. The proforma was created using the percutaneous nephrolithotomy registry as a basis. It was initially approved and piloted by the BAUS Section of Endourology Data and Audit committee. Thereafter it was approved by the BAUS Audit committee.                                                                                                                                                                                                                                                                                                                                                                                                                                                                  | Patient demographics, procedure side, elective/emergency, grade of surgeon, number and site of stones(), size of stone, pre-op investigations, whether stent was used pre-operatively, use of prophylactic antibiotics, supervised training operation, procedure (rigid/flexible ureteroscope), difficult access, accessory procedures, percentage of procedures abandoned, total stone clearance rate, complications, length of stay, post operative imaging | NS | A national prospective audit link was sent to all consultant members of the BAUS Section of Endourology. Members were encouraged to complete the standardised proforma for all URS undertaken for stone management during a two week period (23 April 2012-6 May 2012). To develop this audit into a registry. Compulsory Surgeon participation, which may occur with revalidation, may provide the only means of accurate data capture | 143 procedures were recorded. 26% of cases performed in England were recorded | NS | NS                                                                                                                                                                                                                                                                                                                                                                                                                                                                                                                                     | Follow-up period was short, and long-term complications will be missed. There was no precise definition for day-case surgery. Surgeons are already under increased pressure to record and document all surgical activity and a registry will inevitably increase this burden. Time constraints may compromise accurate and timely data recording and lead to apathy in some surgeons, limiting participation. | NS                                                                                                                                                                                                                                                                                   | NS                                                                                                                                                                    | NS |
| Franklin P.D.<br>Harrold L.<br>Ayers D.C. | Incorporating patient-reported outcomes in total joint arthroplasty registries. Challenges and opportunities | 2013 | Total Joint Arthroplasty | Total Joint Arthroplasty | NS                                         | NS | This paper reviews the use of Patient reported outcomes (PROs) by worldwide TJA registries, the challenges of integrating PROs in national implant registries and lessons from registries that have used PROs | NS | Whether government-funded or supported by specialist bodies, manufacturers, or research agencies, the costs of registry data collection must be justified by the value of the knowledge gained from the analyses. | Omitting patient-reported outcomes precludes surgeons from fully understanding the factors that contribute to pain relief, restoration of function, and patient satisfaction. PROs are increasingly used in the allocation of healthcare resources and comparative effectiveness research. PRO data must be valuable to multiple stakeholders to justify the incremental costs of their collection. Important to choose suitable PROs and develop innovative methods to collect data. To improve long-term data completion, some registries collect PROs directly from patients at regular intervals after TJA. It is better not to rely on collecting data when patients return to clinic rather it is better to collect data directly from patients (direct-to-patient models). There was a lack of consensus over | Implant longevity, revision rates, patient demographics, BMI, co-morbidities, PROs related to pain relief and functional gains                                                                                                                                                                                                                                                                                                                                | NS | Registry procedures should be simple to increase participation. Returning registry data to the surgeon encourages ongoing commitment to complete data collection                                                                                                                                                                                                                                                                        | NS                                                                            | NS | Direct entering of PRO data by patients via web-based software and mobile phones will help improve follow-up data. To increase patient participation in their own data collection, it is important to engage the patient during the consent process, have a registry coordinator to follow up the patient to encourage participation, make it easy for patients to enter PRO data electronically, and have multiple languages available. Beneficial to consent patients to be enrolled in PRO capture at the time surgery is scheduled | This review found that most data is collected at the time the patient undergoes the procedure, but postoperative follow up data is often lacking - due to different clinician/hospital.                                                                                                                                                                                                                       | Enable monitoring of postdischarge outcomes and identify patient who may be at risk for implant failure. PROs also help guide best practices and help regulate implants providing important information to manufacturers. Such data informs surgeons practice and enables self-audit | The International Society of Arthroplasty Registries defines a full member registry as one that captures more than 90% of all cases and clinically validates the data | NS |

which PRO to choose - generic measures or condition specific, pre and post op PROs or only pre/post. It can be time consuming to enter PRO data and can be difficult to engage patients to enter their own PRO data.

|    |              |                                                                                                                     |      |                                                 |              |    |                                                                                                               |                                                                                                                                                                                                                                                                                                      |                                                                                                                                                                                                                                                                                                                                                                                                                                                                                                                                                                                                                                                                  |                                                                                                                                                     |    |                                                                                                                                                                                                                                                                                                                                                                                                                                              |                                                                                                                                                                       |                                                                                                                                                                                                                                                                                                                                                                                                                                                                                                                                                                                                                                                                      |    |    |    |    |                                                                                                                                                                                                                                                                                                                                                                                                                                                                                              |    |                                                                                                                                                                                                                                                                                                                                                                                                                                                                                                                                                                                                                                                                                                                                                                                                                                                                                                                                                                                                                                                                                                                                                                                                      |
|----|--------------|---------------------------------------------------------------------------------------------------------------------|------|-------------------------------------------------|--------------|----|---------------------------------------------------------------------------------------------------------------|------------------------------------------------------------------------------------------------------------------------------------------------------------------------------------------------------------------------------------------------------------------------------------------------------|------------------------------------------------------------------------------------------------------------------------------------------------------------------------------------------------------------------------------------------------------------------------------------------------------------------------------------------------------------------------------------------------------------------------------------------------------------------------------------------------------------------------------------------------------------------------------------------------------------------------------------------------------------------|-----------------------------------------------------------------------------------------------------------------------------------------------------|----|----------------------------------------------------------------------------------------------------------------------------------------------------------------------------------------------------------------------------------------------------------------------------------------------------------------------------------------------------------------------------------------------------------------------------------------------|-----------------------------------------------------------------------------------------------------------------------------------------------------------------------|----------------------------------------------------------------------------------------------------------------------------------------------------------------------------------------------------------------------------------------------------------------------------------------------------------------------------------------------------------------------------------------------------------------------------------------------------------------------------------------------------------------------------------------------------------------------------------------------------------------------------------------------------------------------|----|----|----|----|----------------------------------------------------------------------------------------------------------------------------------------------------------------------------------------------------------------------------------------------------------------------------------------------------------------------------------------------------------------------------------------------------------------------------------------------------------------------------------------------|----|------------------------------------------------------------------------------------------------------------------------------------------------------------------------------------------------------------------------------------------------------------------------------------------------------------------------------------------------------------------------------------------------------------------------------------------------------------------------------------------------------------------------------------------------------------------------------------------------------------------------------------------------------------------------------------------------------------------------------------------------------------------------------------------------------------------------------------------------------------------------------------------------------------------------------------------------------------------------------------------------------------------------------------------------------------------------------------------------------------------------------------------------------------------------------------------------------|
| 1  |              |                                                                                                                     |      |                                                 |              |    |                                                                                                               |                                                                                                                                                                                                                                                                                                      |                                                                                                                                                                                                                                                                                                                                                                                                                                                                                                                                                                                                                                                                  |                                                                                                                                                     |    |                                                                                                                                                                                                                                                                                                                                                                                                                                              |                                                                                                                                                                       |                                                                                                                                                                                                                                                                                                                                                                                                                                                                                                                                                                                                                                                                      |    |    |    |    |                                                                                                                                                                                                                                                                                                                                                                                                                                                                                              |    |                                                                                                                                                                                                                                                                                                                                                                                                                                                                                                                                                                                                                                                                                                                                                                                                                                                                                                                                                                                                                                                                                                                                                                                                      |
| 2  |              |                                                                                                                     |      |                                                 |              |    |                                                                                                               |                                                                                                                                                                                                                                                                                                      |                                                                                                                                                                                                                                                                                                                                                                                                                                                                                                                                                                                                                                                                  |                                                                                                                                                     |    |                                                                                                                                                                                                                                                                                                                                                                                                                                              |                                                                                                                                                                       |                                                                                                                                                                                                                                                                                                                                                                                                                                                                                                                                                                                                                                                                      |    |    |    |    |                                                                                                                                                                                                                                                                                                                                                                                                                                                                                              |    |                                                                                                                                                                                                                                                                                                                                                                                                                                                                                                                                                                                                                                                                                                                                                                                                                                                                                                                                                                                                                                                                                                                                                                                                      |
| 3  |              |                                                                                                                     |      |                                                 |              |    |                                                                                                               |                                                                                                                                                                                                                                                                                                      |                                                                                                                                                                                                                                                                                                                                                                                                                                                                                                                                                                                                                                                                  |                                                                                                                                                     |    |                                                                                                                                                                                                                                                                                                                                                                                                                                              |                                                                                                                                                                       |                                                                                                                                                                                                                                                                                                                                                                                                                                                                                                                                                                                                                                                                      |    |    |    |    |                                                                                                                                                                                                                                                                                                                                                                                                                                                                                              |    |                                                                                                                                                                                                                                                                                                                                                                                                                                                                                                                                                                                                                                                                                                                                                                                                                                                                                                                                                                                                                                                                                                                                                                                                      |
| 4  |              |                                                                                                                     |      |                                                 |              |    |                                                                                                               |                                                                                                                                                                                                                                                                                                      |                                                                                                                                                                                                                                                                                                                                                                                                                                                                                                                                                                                                                                                                  |                                                                                                                                                     |    |                                                                                                                                                                                                                                                                                                                                                                                                                                              |                                                                                                                                                                       |                                                                                                                                                                                                                                                                                                                                                                                                                                                                                                                                                                                                                                                                      |    |    |    |    |                                                                                                                                                                                                                                                                                                                                                                                                                                                                                              |    |                                                                                                                                                                                                                                                                                                                                                                                                                                                                                                                                                                                                                                                                                                                                                                                                                                                                                                                                                                                                                                                                                                                                                                                                      |
| 5  |              |                                                                                                                     |      |                                                 |              |    |                                                                                                               |                                                                                                                                                                                                                                                                                                      |                                                                                                                                                                                                                                                                                                                                                                                                                                                                                                                                                                                                                                                                  |                                                                                                                                                     |    |                                                                                                                                                                                                                                                                                                                                                                                                                                              |                                                                                                                                                                       |                                                                                                                                                                                                                                                                                                                                                                                                                                                                                                                                                                                                                                                                      |    |    |    |    |                                                                                                                                                                                                                                                                                                                                                                                                                                                                                              |    |                                                                                                                                                                                                                                                                                                                                                                                                                                                                                                                                                                                                                                                                                                                                                                                                                                                                                                                                                                                                                                                                                                                                                                                                      |
| 6  |              |                                                                                                                     |      |                                                 |              |    |                                                                                                               |                                                                                                                                                                                                                                                                                                      |                                                                                                                                                                                                                                                                                                                                                                                                                                                                                                                                                                                                                                                                  |                                                                                                                                                     |    |                                                                                                                                                                                                                                                                                                                                                                                                                                              |                                                                                                                                                                       |                                                                                                                                                                                                                                                                                                                                                                                                                                                                                                                                                                                                                                                                      |    |    |    |    |                                                                                                                                                                                                                                                                                                                                                                                                                                                                                              |    |                                                                                                                                                                                                                                                                                                                                                                                                                                                                                                                                                                                                                                                                                                                                                                                                                                                                                                                                                                                                                                                                                                                                                                                                      |
| 7  |              |                                                                                                                     |      |                                                 |              |    |                                                                                                               |                                                                                                                                                                                                                                                                                                      |                                                                                                                                                                                                                                                                                                                                                                                                                                                                                                                                                                                                                                                                  |                                                                                                                                                     |    |                                                                                                                                                                                                                                                                                                                                                                                                                                              |                                                                                                                                                                       |                                                                                                                                                                                                                                                                                                                                                                                                                                                                                                                                                                                                                                                                      |    |    |    |    |                                                                                                                                                                                                                                                                                                                                                                                                                                                                                              |    |                                                                                                                                                                                                                                                                                                                                                                                                                                                                                                                                                                                                                                                                                                                                                                                                                                                                                                                                                                                                                                                                                                                                                                                                      |
| 8  |              |                                                                                                                     |      |                                                 |              |    |                                                                                                               |                                                                                                                                                                                                                                                                                                      |                                                                                                                                                                                                                                                                                                                                                                                                                                                                                                                                                                                                                                                                  |                                                                                                                                                     |    |                                                                                                                                                                                                                                                                                                                                                                                                                                              |                                                                                                                                                                       |                                                                                                                                                                                                                                                                                                                                                                                                                                                                                                                                                                                                                                                                      |    |    |    |    |                                                                                                                                                                                                                                                                                                                                                                                                                                                                                              |    |                                                                                                                                                                                                                                                                                                                                                                                                                                                                                                                                                                                                                                                                                                                                                                                                                                                                                                                                                                                                                                                                                                                                                                                                      |
| 9  | Bulusu V.R.  | Rationale and design of a UK database for a rare cancer type: The GEM Registry for gastrointestinal stromal tumours | 2013 | GIST Epidemiology and Management (GEM) Registry | GIST tumours | NS | The registry is regulated by the UK GEM Registry Steering Committee, comprised of recognised experts in GIST. | Aim of paper: To describe the rationale and study design of the GIST Epidemiology and Management (GEM) Registry. Aim of registry: to further characterise patients with GISTs and to provide comprehensive data to improve understanding of the incidence, treatment and outcomes of GISTs in the UK | Web-based system. The GEM database has been designed around a Microsoft Access (MSACCESS) core using a SQL interface from specifically designed Active Server (asp) web pages. There are two main data input pages, for clinical and pathological (extended) data, together with facilities for reviewing historical records for each patient and generating real-time reports on the current database content. Piloting the registry was useful. It allowed GIST clinicians using the registry to test the software and identify any areas for improvement - suggested modifications were agreed by the Steering Committee before implementation on the website | Development of the UK GEM Registry and ongoing training was supported by an unrestricted educational grant from Novartis Pharmaceuticals UK limited | NS | Demographics, date of diagnosis, tumour characteristics, referral source, mode of presentation, biopsy details and date of procedure, rupture (yes/no), risk assessment, tumour type, details of resection, adjuvant treatment, details of metastases, relapse date, participation in clinical trial (yes/no), date and cause of death, consent received, loss to follow up recorded. For centres willing an extended data set was available | Periodic on-site quality assurance checks are maintained, together with continuous statistical comparisons of local data between centres to warrant data consistency. | The interface pages provide real-time assistance with data input, by providing reminders for mandatory fields, acceptable ranges for numeric fields, calendar support for dates and drop-down boxes for most text input. Data clerks, nurses and clinicians at each participating centre attended training sessions to ensure data accuracy. Every unit had training on the use of the registry tool. A user guide was available and e-mail and telephone support was provided. Ongoing training and support for newly recruited centres, drop-down boxes, calendars and numeric limits in the web-based software interface can reduce the likelihood of human error | NS | NS | NS | NS | The registry data will provide important insights into the incidence, prevalence, recurrence, survival and mortality rates of GISTs, as well as treatment practices throughout the UK, thereby enabling therapeutic intervention to be evaluated and ultimately optimised. It will also help review prognosis and assess long term treatment benefits and improve quality of care delivery. This information will help inform clinical practice and guide the development of clinical trials | NS | The Registry will be implemented and reported in accordance with applicable local regulations and with the ethical principles laid down in the Declaration of Helsinki. Ethical approval was granted centrally for the registry via the National Research Ethic Service. Eligible patients will only be included in the study after providing written, informed consent. All data will be anonymous. Data stored on either local hospital server or at server maintained by commercial host. Periodically, locally stored information is uploaded to the central UK GIST Registry (National Data set) held on the host server. User access to the system is password protected and has multiple levels of privilege for data editing, record deletion, transmission to the central server & creation of new user accounts. Clinicians are able to access the system from anywhere via logging in via the hospital intranet. The Steering Committee reviews the requests for access to the registry. Each request is carefully reviewed on a case by case basis and appropriate access granted for ethically approved research projects. Access to the system is limited to individuals having access |
| 10 | Fullarton J. |                                                                                                                     |      |                                                 |              |    |                                                                                                               |                                                                                                                                                                                                                                                                                                      |                                                                                                                                                                                                                                                                                                                                                                                                                                                                                                                                                                                                                                                                  |                                                                                                                                                     |    |                                                                                                                                                                                                                                                                                                                                                                                                                                              |                                                                                                                                                                       |                                                                                                                                                                                                                                                                                                                                                                                                                                                                                                                                                                                                                                                                      |    |    |    |    |                                                                                                                                                                                                                                                                                                                                                                                                                                                                                              |    |                                                                                                                                                                                                                                                                                                                                                                                                                                                                                                                                                                                                                                                                                                                                                                                                                                                                                                                                                                                                                                                                                                                                                                                                      |
| 11 | Leahy M.     |                                                                                                                     |      |                                                 |              |    |                                                                                                               |                                                                                                                                                                                                                                                                                                      |                                                                                                                                                                                                                                                                                                                                                                                                                                                                                                                                                                                                                                                                  |                                                                                                                                                     |    |                                                                                                                                                                                                                                                                                                                                                                                                                                              |                                                                                                                                                                       |                                                                                                                                                                                                                                                                                                                                                                                                                                                                                                                                                                                                                                                                      |    |    |    |    |                                                                                                                                                                                                                                                                                                                                                                                                                                                                                              |    |                                                                                                                                                                                                                                                                                                                                                                                                                                                                                                                                                                                                                                                                                                                                                                                                                                                                                                                                                                                                                                                                                                                                                                                                      |
| 12 | Morgan C.    |                                                                                                                     |      |                                                 |              |    |                                                                                                               |                                                                                                                                                                                                                                                                                                      |                                                                                                                                                                                                                                                                                                                                                                                                                                                                                                                                                                                                                                                                  |                                                                                                                                                     |    |                                                                                                                                                                                                                                                                                                                                                                                                                                              |                                                                                                                                                                       |                                                                                                                                                                                                                                                                                                                                                                                                                                                                                                                                                                                                                                                                      |    |    |    |    |                                                                                                                                                                                                                                                                                                                                                                                                                                                                                              |    |                                                                                                                                                                                                                                                                                                                                                                                                                                                                                                                                                                                                                                                                                                                                                                                                                                                                                                                                                                                                                                                                                                                                                                                                      |
| 13 | Rasheed A.   |                                                                                                                     |      |                                                 |              |    |                                                                                                               |                                                                                                                                                                                                                                                                                                      |                                                                                                                                                                                                                                                                                                                                                                                                                                                                                                                                                                                                                                                                  |                                                                                                                                                     |    |                                                                                                                                                                                                                                                                                                                                                                                                                                              |                                                                                                                                                                       |                                                                                                                                                                                                                                                                                                                                                                                                                                                                                                                                                                                                                                                                      |    |    |    |    |                                                                                                                                                                                                                                                                                                                                                                                                                                                                                              |    |                                                                                                                                                                                                                                                                                                                                                                                                                                                                                                                                                                                                                                                                                                                                                                                                                                                                                                                                                                                                                                                                                                                                                                                                      |
| 14 | Taniere P.   |                                                                                                                     |      |                                                 |              |    |                                                                                                               |                                                                                                                                                                                                                                                                                                      |                                                                                                                                                                                                                                                                                                                                                                                                                                                                                                                                                                                                                                                                  |                                                                                                                                                     |    |                                                                                                                                                                                                                                                                                                                                                                                                                                              |                                                                                                                                                                       |                                                                                                                                                                                                                                                                                                                                                                                                                                                                                                                                                                                                                                                                      |    |    |    |    |                                                                                                                                                                                                                                                                                                                                                                                                                                                                                              |    |                                                                                                                                                                                                                                                                                                                                                                                                                                                                                                                                                                                                                                                                                                                                                                                                                                                                                                                                                                                                                                                                                                                                                                                                      |
| 15 | Toh S.       |                                                                                                                     |      |                                                 |              |    |                                                                                                               |                                                                                                                                                                                                                                                                                                      |                                                                                                                                                                                                                                                                                                                                                                                                                                                                                                                                                                                                                                                                  |                                                                                                                                                     |    |                                                                                                                                                                                                                                                                                                                                                                                                                                              |                                                                                                                                                                       |                                                                                                                                                                                                                                                                                                                                                                                                                                                                                                                                                                                                                                                                      |    |    |    |    |                                                                                                                                                                                                                                                                                                                                                                                                                                                                                              |    |                                                                                                                                                                                                                                                                                                                                                                                                                                                                                                                                                                                                                                                                                                                                                                                                                                                                                                                                                                                                                                                                                                                                                                                                      |
| 16 | Vernill M.   |                                                                                                                     |      |                                                 |              |    |                                                                                                               |                                                                                                                                                                                                                                                                                                      |                                                                                                                                                                                                                                                                                                                                                                                                                                                                                                                                                                                                                                                                  |                                                                                                                                                     |    |                                                                                                                                                                                                                                                                                                                                                                                                                                              |                                                                                                                                                                       |                                                                                                                                                                                                                                                                                                                                                                                                                                                                                                                                                                                                                                                                      |    |    |    |    |                                                                                                                                                                                                                                                                                                                                                                                                                                                                                              |    |                                                                                                                                                                                                                                                                                                                                                                                                                                                                                                                                                                                                                                                                                                                                                                                                                                                                                                                                                                                                                                                                                                                                                                                                      |
| 17 | White J.     |                                                                                                                     |      |                                                 |              |    |                                                                                                               |                                                                                                                                                                                                                                                                                                      |                                                                                                                                                                                                                                                                                                                                                                                                                                                                                                                                                                                                                                                                  |                                                                                                                                                     |    |                                                                                                                                                                                                                                                                                                                                                                                                                                              |                                                                                                                                                                       |                                                                                                                                                                                                                                                                                                                                                                                                                                                                                                                                                                                                                                                                      |    |    |    |    |                                                                                                                                                                                                                                                                                                                                                                                                                                                                                              |    |                                                                                                                                                                                                                                                                                                                                                                                                                                                                                                                                                                                                                                                                                                                                                                                                                                                                                                                                                                                                                                                                                                                                                                                                      |
| 18 | Judson I.    |                                                                                                                     |      |                                                 |              |    |                                                                                                               |                                                                                                                                                                                                                                                                                                      |                                                                                                                                                                                                                                                                                                                                                                                                                                                                                                                                                                                                                                                                  |                                                                                                                                                     |    |                                                                                                                                                                                                                                                                                                                                                                                                                                              |                                                                                                                                                                       |                                                                                                                                                                                                                                                                                                                                                                                                                                                                                                                                                                                                                                                                      |    |    |    |    |                                                                                                                                                                                                                                                                                                                                                                                                                                                                                              |    |                                                                                                                                                                                                                                                                                                                                                                                                                                                                                                                                                                                                                                                                                                                                                                                                                                                                                                                                                                                                                                                                                                                                                                                                      |
| 19 |              |                                                                                                                     |      |                                                 |              |    |                                                                                                               |                                                                                                                                                                                                                                                                                                      |                                                                                                                                                                                                                                                                                                                                                                                                                                                                                                                                                                                                                                                                  |                                                                                                                                                     |    |                                                                                                                                                                                                                                                                                                                                                                                                                                              |                                                                                                                                                                       |                                                                                                                                                                                                                                                                                                                                                                                                                                                                                                                                                                                                                                                                      |    |    |    |    |                                                                                                                                                                                                                                                                                                                                                                                                                                                                                              |    |                                                                                                                                                                                                                                                                                                                                                                                                                                                                                                                                                                                                                                                                                                                                                                                                                                                                                                                                                                                                                                                                                                                                                                                                      |
| 20 |              |                                                                                                                     |      |                                                 |              |    |                                                                                                               |                                                                                                                                                                                                                                                                                                      |                                                                                                                                                                                                                                                                                                                                                                                                                                                                                                                                                                                                                                                                  |                                                                                                                                                     |    |                                                                                                                                                                                                                                                                                                                                                                                                                                              |                                                                                                                                                                       |                                                                                                                                                                                                                                                                                                                                                                                                                                                                                                                                                                                                                                                                      |    |    |    |    |                                                                                                                                                                                                                                                                                                                                                                                                                                                                                              |    |                                                                                                                                                                                                                                                                                                                                                                                                                                                                                                                                                                                                                                                                                                                                                                                                                                                                                                                                                                                                                                                                                                                                                                                                      |
| 21 |              |                                                                                                                     |      |                                                 |              |    |                                                                                                               |                                                                                                                                                                                                                                                                                                      |                                                                                                                                                                                                                                                                                                                                                                                                                                                                                                                                                                                                                                                                  |                                                                                                                                                     |    |                                                                                                                                                                                                                                                                                                                                                                                                                                              |                                                                                                                                                                       |                                                                                                                                                                                                                                                                                                                                                                                                                                                                                                                                                                                                                                                                      |    |    |    |    |                                                                                                                                                                                                                                                                                                                                                                                                                                                                                              |    |                                                                                                                                                                                                                                                                                                                                                                                                                                                                                                                                                                                                                                                                                                                                                                                                                                                                                                                                                                                                                                                                                                                                                                                                      |
| 22 |              |                                                                                                                     |      |                                                 |              |    |                                                                                                               |                                                                                                                                                                                                                                                                                                      |                                                                                                                                                                                                                                                                                                                                                                                                                                                                                                                                                                                                                                                                  |                                                                                                                                                     |    |                                                                                                                                                                                                                                                                                                                                                                                                                                              |                                                                                                                                                                       |                                                                                                                                                                                                                                                                                                                                                                                                                                                                                                                                                                                                                                                                      |    |    |    |    |                                                                                                                                                                                                                                                                                                                                                                                                                                                                                              |    |                                                                                                                                                                                                                                                                                                                                                                                                                                                                                                                                                                                                                                                                                                                                                                                                                                                                                                                                                                                                                                                                                                                                                                                                      |
| 23 |              |                                                                                                                     |      |                                                 |              |    |                                                                                                               |                                                                                                                                                                                                                                                                                                      |                                                                                                                                                                                                                                                                                                                                                                                                                                                                                                                                                                                                                                                                  |                                                                                                                                                     |    |                                                                                                                                                                                                                                                                                                                                                                                                                                              |                                                                                                                                                                       |                                                                                                                                                                                                                                                                                                                                                                                                                                                                                                                                                                                                                                                                      |    |    |    |    |                                                                                                                                                                                                                                                                                                                                                                                                                                                                                              |    |                                                                                                                                                                                                                                                                                                                                                                                                                                                                                                                                                                                                                                                                                                                                                                                                                                                                                                                                                                                                                                                                                                                                                                                                      |
| 24 |              |                                                                                                                     |      |                                                 |              |    |                                                                                                               |                                                                                                                                                                                                                                                                                                      |                                                                                                                                                                                                                                                                                                                                                                                                                                                                                                                                                                                                                                                                  |                                                                                                                                                     |    |                                                                                                                                                                                                                                                                                                                                                                                                                                              |                                                                                                                                                                       |                                                                                                                                                                                                                                                                                                                                                                                                                                                                                                                                                                                                                                                                      |    |    |    |    |                                                                                                                                                                                                                                                                                                                                                                                                                                                                                              |    |                                                                                                                                                                                                                                                                                                                                                                                                                                                                                                                                                                                                                                                                                                                                                                                                                                                                                                                                                                                                                                                                                                                                                                                                      |
| 25 |              |                                                                                                                     |      |                                                 |              |    |                                                                                                               |                                                                                                                                                                                                                                                                                                      |                                                                                                                                                                                                                                                                                                                                                                                                                                                                                                                                                                                                                                                                  |                                                                                                                                                     |    |                                                                                                                                                                                                                                                                                                                                                                                                                                              |                                                                                                                                                                       |                                                                                                                                                                                                                                                                                                                                                                                                                                                                                                                                                                                                                                                                      |    |    |    |    |                                                                                                                                                                                                                                                                                                                                                                                                                                                                                              |    |                                                                                                                                                                                                                                                                                                                                                                                                                                                                                                                                                                                                                                                                                                                                                                                                                                                                                                                                                                                                                                                                                                                                                                                                      |
| 26 |              |                                                                                                                     |      |                                                 |              |    |                                                                                                               |                                                                                                                                                                                                                                                                                                      |                                                                                                                                                                                                                                                                                                                                                                                                                                                                                                                                                                                                                                                                  |                                                                                                                                                     |    |                                                                                                                                                                                                                                                                                                                                                                                                                                              |                                                                                                                                                                       |                                                                                                                                                                                                                                                                                                                                                                                                                                                                                                                                                                                                                                                                      |    |    |    |    |                                                                                                                                                                                                                                                                                                                                                                                                                                                                                              |    |                                                                                                                                                                                                                                                                                                                                                                                                                                                                                                                                                                                                                                                                                                                                                                                                                                                                                                                                                                                                                                                                                                                                                                                                      |
| 27 |              |                                                                                                                     |      |                                                 |              |    |                                                                                                               |                                                                                                                                                                                                                                                                                                      |                                                                                                                                                                                                                                                                                                                                                                                                                                                                                                                                                                                                                                                                  |                                                                                                                                                     |    |                                                                                                                                                                                                                                                                                                                                                                                                                                              |                                                                                                                                                                       |                                                                                                                                                                                                                                                                                                                                                                                                                                                                                                                                                                                                                                                                      |    |    |    |    |                                                                                                                                                                                                                                                                                                                                                                                                                                                                                              |    |                                                                                                                                                                                                                                                                                                                                                                                                                                                                                                                                                                                                                                                                                                                                                                                                                                                                                                                                                                                                                                                                                                                                                                                                      |
| 28 |              |                                                                                                                     |      |                                                 |              |    |                                                                                                               |                                                                                                                                                                                                                                                                                                      |                                                                                                                                                                                                                                                                                                                                                                                                                                                                                                                                                                                                                                                                  |                                                                                                                                                     |    |                                                                                                                                                                                                                                                                                                                                                                                                                                              |                                                                                                                                                                       |                                                                                                                                                                                                                                                                                                                                                                                                                                                                                                                                                                                                                                                                      |    |    |    |    |                                                                                                                                                                                                                                                                                                                                                                                                                                                                                              |    |                                                                                                                                                                                                                                                                                                                                                                                                                                                                                                                                                                                                                                                                                                                                                                                                                                                                                                                                                                                                                                                                                                                                                                                                      |
| 29 |              |                                                                                                                     |      |                                                 |              |    |                                                                                                               |                                                                                                                                                                                                                                                                                                      |                                                                                                                                                                                                                                                                                                                                                                                                                                                                                                                                                                                                                                                                  |                                                                                                                                                     |    |                                                                                                                                                                                                                                                                                                                                                                                                                                              |                                                                                                                                                                       |                                                                                                                                                                                                                                                                                                                                                                                                                                                                                                                                                                                                                                                                      |    |    |    |    |                                                                                                                                                                                                                                                                                                                                                                                                                                                                                              |    |                                                                                                                                                                                                                                                                                                                                                                                                                                                                                                                                                                                                                                                                                                                                                                                                                                                                                                                                                                                                                                                                                                                                                                                                      |
| 30 |              |                                                                                                                     |      |                                                 |              |    |                                                                                                               |                                                                                                                                                                                                                                                                                                      |                                                                                                                                                                                                                                                                                                                                                                                                                                                                                                                                                                                                                                                                  |                                                                                                                                                     |    |                                                                                                                                                                                                                                                                                                                                                                                                                                              |                                                                                                                                                                       |                                                                                                                                                                                                                                                                                                                                                                                                                                                                                                                                                                                                                                                                      |    |    |    |    |                                                                                                                                                                                                                                                                                                                                                                                                                                                                                              |    |                                                                                                                                                                                                                                                                                                                                                                                                                                                                                                                                                                                                                                                                                                                                                                                                                                                                                                                                                                                                                                                                                                                                                                                                      |
| 31 |              |                                                                                                                     |      |                                                 |              |    |                                                                                                               |                                                                                                                                                                                                                                                                                                      |                                                                                                                                                                                                                                                                                                                                                                                                                                                                                                                                                                                                                                                                  |                                                                                                                                                     |    |                                                                                                                                                                                                                                                                                                                                                                                                                                              |                                                                                                                                                                       |                                                                                                                                                                                                                                                                                                                                                                                                                                                                                                                                                                                                                                                                      |    |    |    |    |                                                                                                                                                                                                                                                                                                                                                                                                                                                                                              |    |                                                                                                                                                                                                                                                                                                                                                                                                                                                                                                                                                                                                                                                                                                                                                                                                                                                                                                                                                                                                                                                                                                                                                                                                      |
| 32 |              |                                                                                                                     |      |                                                 |              |    |                                                                                                               |                                                                                                                                                                                                                                                                                                      |                                                                                                                                                                                                                                                                                                                                                                                                                                                                                                                                                                                                                                                                  |                                                                                                                                                     |    |                                                                                                                                                                                                                                                                                                                                                                                                                                              |                                                                                                                                                                       |                                                                                                                                                                                                                                                                                                                                                                                                                                                                                                                                                                                                                                                                      |    |    |    |    |                                                                                                                                                                                                                                                                                                                                                                                                                                                                                              |    |                                                                                                                                                                                                                                                                                                                                                                                                                                                                                                                                                                                                                                                                                                                                                                                                                                                                                                                                                                                                                                                                                                                                                                                                      |
| 33 |              |                                                                                                                     |      |                                                 |              |    |                                                                                                               |                                                                                                                                                                                                                                                                                                      |                                                                                                                                                                                                                                                                                                                                                                                                                                                                                                                                                                                                                                                                  |                                                                                                                                                     |    |                                                                                                                                                                                                                                                                                                                                                                                                                                              |                                                                                                                                                                       |                                                                                                                                                                                                                                                                                                                                                                                                                                                                                                                                                                                                                                                                      |    |    |    |    |                                                                                                                                                                                                                                                                                                                                                                                                                                                                                              |    |                                                                                                                                                                                                                                                                                                                                                                                                                                                                                                                                                                                                                                                                                                                                                                                                                                                                                                                                                                                                                                                                                                                                                                                                      |
| 34 |              |                                                                                                                     |      |                                                 |              |    |                                                                                                               |                                                                                                                                                                                                                                                                                                      |                                                                                                                                                                                                                                                                                                                                                                                                                                                                                                                                                                                                                                                                  |                                                                                                                                                     |    |                                                                                                                                                                                                                                                                                                                                                                                                                                              |                                                                                                                                                                       |                                                                                                                                                                                                                                                                                                                                                                                                                                                                                                                                                                                                                                                                      |    |    |    |    |                                                                                                                                                                                                                                                                                                                                                                                                                                                                                              |    |                                                                                                                                                                                                                                                                                                                                                                                                                                                                                                                                                                                                                                                                                                                                                                                                                                                                                                                                                                                                                                                                                                                                                                                                      |
| 35 |              |                                                                                                                     |      |                                                 |              |    |                                                                                                               |                                                                                                                                                                                                                                                                                                      |                                                                                                                                                                                                                                                                                                                                                                                                                                                                                                                                                                                                                                                                  |                                                                                                                                                     |    |                                                                                                                                                                                                                                                                                                                                                                                                                                              |                                                                                                                                                                       |                                                                                                                                                                                                                                                                                                                                                                                                                                                                                                                                                                                                                                                                      |    |    |    |    |                                                                                                                                                                                                                                                                                                                                                                                                                                                                                              |    |                                                                                                                                                                                                                                                                                                                                                                                                                                                                                                                                                                                                                                                                                                                                                                                                                                                                                                                                                                                                                                                                                                                                                                                                      |
| 36 |              |                                                                                                                     |      |                                                 |              |    |                                                                                                               |                                                                                                                                                                                                                                                                                                      |                                                                                                                                                                                                                                                                                                                                                                                                                                                                                                                                                                                                                                                                  |                                                                                                                                                     |    |                                                                                                                                                                                                                                                                                                                                                                                                                                              |                                                                                                                                                                       |                                                                                                                                                                                                                                                                                                                                                                                                                                                                                                                                                                                                                                                                      |    |    |    |    |                                                                                                                                                                                                                                                                                                                                                                                                                                                                                              |    |                                                                                                                                                                                                                                                                                                                                                                                                                                                                                                                                                                                                                                                                                                                                                                                                                                                                                                                                                                                                                                                                                                                                                                                                      |
| 37 |              |                                                                                                                     |      |                                                 |              |    |                                                                                                               |                                                                                                                                                                                                                                                                                                      |                                                                                                                                                                                                                                                                                                                                                                                                                                                                                                                                                                                                                                                                  |                                                                                                                                                     |    |                                                                                                                                                                                                                                                                                                                                                                                                                                              |                                                                                                                                                                       |                                                                                                                                                                                                                                                                                                                                                                                                                                                                                                                                                                                                                                                                      |    |    |    |    |                                                                                                                                                                                                                                                                                                                                                                                                                                                                                              |    |                                                                                                                                                                                                                                                                                                                                                                                                                                                                                                                                                                                                                                                                                                                                                                                                                                                                                                                                                                                                                                                                                                                                                                                                      |
| 38 |              |                                                                                                                     |      |                                                 |              |    |                                                                                                               |                                                                                                                                                                                                                                                                                                      |                                                                                                                                                                                                                                                                                                                                                                                                                                                                                                                                                                                                                                                                  |                                                                                                                                                     |    |                                                                                                                                                                                                                                                                                                                                                                                                                                              |                                                                                                                                                                       |                                                                                                                                                                                                                                                                                                                                                                                                                                                                                                                                                                                                                                                                      |    |    |    |    |                                                                                                                                                                                                                                                                                                                                                                                                                                                                                              |    |                                                                                                                                                                                                                                                                                                                                                                                                                                                                                                                                                                                                                                                                                                                                                                                                                                                                                                                                                                                                                                                                                                                                                                                                      |
| 39 |              |                                                                                                                     |      |                                                 |              |    |                                                                                                               |                                                                                                                                                                                                                                                                                                      |                                                                                                                                                                                                                                                                                                                                                                                                                                                                                                                                                                                                                                                                  |                                                                                                                                                     |    |                                                                                                                                                                                                                                                                                                                                                                                                                                              |                                                                                                                                                                       |                                                                                                                                                                                                                                                                                                                                                                                                                                                                                                                                                                                                                                                                      |    |    |    |    |                                                                                                                                                                                                                                                                                                                                                                                                                                                                                              |    |                                                                                                                                                                                                                                                                                                                                                                                                                                                                                                                                                                                                                                                                                                                                                                                                                                                                                                                                                                                                                                                                                                                                                                                                      |
| 40 |              |                                                                                                                     |      |                                                 |              |    |                                                                                                               |                                                                                                                                                                                                                                                                                                      |                                                                                                                                                                                                                                                                                                                                                                                                                                                                                                                                                                                                                                                                  |                                                                                                                                                     |    |                                                                                                                                                                                                                                                                                                                                                                                                                                              |                                                                                                                                                                       |                                                                                                                                                                                                                                                                                                                                                                                                                                                                                                                                                                                                                                                                      |    |    |    |    |                                                                                                                                                                                                                                                                                                                                                                                                                                                                                              |    |                                                                                                                                                                                                                                                                                                                                                                                                                                                                                                                                                                                                                                                                                                                                                                                                                                                                                                                                                                                                                                                                                                                                                                                                      |
| 41 |              |                                                                                                                     |      |                                                 |              |    |                                                                                                               |                                                                                                                                                                                                                                                                                                      |                                                                                                                                                                                                                                                                                                                                                                                                                                                                                                                                                                                                                                                                  |                                                                                                                                                     |    |                                                                                                                                                                                                                                                                                                                                                                                                                                              |                                                                                                                                                                       |                                                                                                                                                                                                                                                                                                                                                                                                                                                                                                                                                                                                                                                                      |    |    |    |    |                                                                                                                                                                                                                                                                                                                                                                                                                                                                                              |    |                                                                                                                                                                                                                                                                                                                                                                                                                                                                                                                                                                                                                                                                                                                                                                                                                                                                                                                                                                                                                                                                                                                                                                                                      |
| 42 |              |                                                                                                                     |      |                                                 |              |    |                                                                                                               |                                                                                                                                                                                                                                                                                                      |                                                                                                                                                                                                                                                                                                                                                                                                                                                                                                                                                                                                                                                                  |                                                                                                                                                     |    |                                                                                                                                                                                                                                                                                                                                                                                                                                              |                                                                                                                                                                       |                                                                                                                                                                                                                                                                                                                                                                                                                                                                                                                                                                                                                                                                      |    |    |    |    |                                                                                                                                                                                                                                                                                                                                                                                                                                                                                              |    |                                                                                                                                                                                                                                                                                                                                                                                                                                                                                                                                                                                                                                                                                                                                                                                                                                                                                                                                                                                                                                                                                                                                                                                                      |
| 43 |              |                                                                                                                     |      |                                                 |              |    |                                                                                                               |                                                                                                                                                                                                                                                                                                      |                                                                                                                                                                                                                                                                                                                                                                                                                                                                                                                                                                                                                                                                  |                                                                                                                                                     |    |                                                                                                                                                                                                                                                                                                                                                                                                                                              |                                                                                                                                                                       |                                                                                                                                                                                                                                                                                                                                                                                                                                                                                                                                                                                                                                                                      |    |    |    |    |                                                                                                                                                                                                                                                                                                                                                                                                                                                                                              |    |                                                                                                                                                                                                                                                                                                                                                                                                                                                                                                                                                                                                                                                                                                                                                                                                                                                                                                                                                                                                                                                                                                                                                                                                      |
| 44 |              |                                                                                                                     |      |                                                 |              |    |                                                                                                               |                                                                                                                                                                                                                                                                                                      |                                                                                                                                                                                                                                                                                                                                                                                                                                                                                                                                                                                                                                                                  |                                                                                                                                                     |    |                                                                                                                                                                                                                                                                                                                                                                                                                                              |                                                                                                                                                                       |                                                                                                                                                                                                                                                                                                                                                                                                                                                                                                                                                                                                                                                                      |    |    |    |    |                                                                                                                                                                                                                                                                                                                                                                                                                                                                                              |    |                                                                                                                                                                                                                                                                                                                                                                                                                                                                                                                                                                                                                                                                                                                                                                                                                                                                                                                                                                                                                                                                                                                                                                                                      |
| 45 |              |                                                                                                                     |      |                                                 |              |    |                                                                                                               |                                                                                                                                                                                                                                                                                                      |                                                                                                                                                                                                                                                                                                                                                                                                                                                                                                                                                                                                                                                                  |                                                                                                                                                     |    |                                                                                                                                                                                                                                                                                                                                                                                                                                              |                                                                                                                                                                       |                                                                                                                                                                                                                                                                                                                                                                                                                                                                                                                                                                                                                                                                      |    |    |    |    |                                                                                                                                                                                                                                                                                                                                                                                                                                                                                              |    |                                                                                                                                                                                                                                                                                                                                                                                                                                                                                                                                                                                                                                                                                                                                                                                                                                                                                                                                                                                                                                                                                                                                                                                                      |
| 46 |              |                                                                                                                     |      |                                                 |              |    |                                                                                                               |                                                                                                                                                                                                                                                                                                      |                                                                                                                                                                                                                                                                                                                                                                                                                                                                                                                                                                                                                                                                  |                                                                                                                                                     |    |                                                                                                                                                                                                                                                                                                                                                                                                                                              |                                                                                                                                                                       |                                                                                                                                                                                                                                                                                                                                                                                                                                                                                                                                                                                                                                                                      |    |    |    |    |                                                                                                                                                                                                                                                                                                                                                                                                                                                                                              |    |                                                                                                                                                                                                                                                                                                                                                                                                                                                                                                                                                                                                                                                                                                                                                                                                                                                                                                                                                                                                                                                                                                                                                                                                      |
| 47 |              |                                                                                                                     |      |                                                 |              |    |                                                                                                               |                                                                                                                                                                                                                                                                                                      |                                                                                                                                                                                                                                                                                                                                                                                                                                                                                                                                                                                                                                                                  |                                                                                                                                                     |    |                                                                                                                                                                                                                                                                                                                                                                                                                                              |                                                                                                                                                                       |                                                                                                                                                                                                                                                                                                                                                                                                                                                                                                                                                                                                                                                                      |    |    |    |    |                                                                                                                                                                                                                                                                                                                                                                                                                                                                                              |    |                                                                                                                                                                                                                                                                                                                                                                                                                                                                                                                                                                                                                                                                                                                                                                                                                                                                                                                                                                                                                                                                                                                                                                                                      |
| 48 |              |                                                                                                                     |      |                                                 |              |    |                                                                                                               |                                                                                                                                                                                                                                                                                                      |                                                                                                                                                                                                                                                                                                                                                                                                                                                                                                                                                                                                                                                                  |                                                                                                                                                     |    |                                                                                                                                                                                                                                                                                                                                                                                                                                              |                                                                                                                                                                       |                                                                                                                                                                                                                                                                                                                                                                                                                                                                                                                                                                                                                                                                      |    |    |    |    |                                                                                                                                                                                                                                                                                                                                                                                                                                                                                              |    |                                                                                                                                                                                                                                                                                                                                                                                                                                                                                                                                                                                                                                                                                                                                                                                                                                                                                                                                                                                                                                                                                                                                                                                                      |
| 49 |              |                                                                                                                     |      |                                                 |              |    |                                                                                                               |                                                                                                                                                                                                                                                                                                      |                                                                                                                                                                                                                                                                                                                                                                                                                                                                                                                                                                                                                                                                  |                                                                                                                                                     |    |                                                                                                                                                                                                                                                                                                                                                                                                                                              |                                                                                                                                                                       |                                                                                                                                                                                                                                                                                                                                                                                                                                                                                                                                                                                                                                                                      |    |    |    |    |                                                                                                                                                                                                                                                                                                                                                                                                                                                                                              |    |                                                                                                                                                                                                                                                                                                                                                                                                                                                                                                                                                                                                                                                                                                                                                                                                                                                                                                                                                                                                                                                                                                                                                                                                      |

to the local intranet and governed by a personal user name and password

1  
2  
3  
4  
5  
6  
7  
8  
9  
10  
11  
12  
13  
14  
15  
16  
17  
18  
19  
20  
21  
22  
23  
24  
25  
26  
27  
28  
29  
30  
31  
32  
33  
34  
35  
36  
37  
38  
39  
40  
41  
42  
43  
44  
45  
46  
47  
48  
49

|                                                                                                                                                         |                                                                                                                                                                                |      |                                                                       |                                                                                                                                                                                                              |                  |                                                                                                                                                                                                       |                                                                                                                                                                                                                                                                                                                                                                                                                                                                                                                                                                                                                                                                                                    |                                                                                                                                                                          |    |                                                                                                                                                                                           |                                                                                                                     |                                                                                                                                                                                                                                                                                                                                                                                                                                                                                                                                                                                                                                               |                                                                                                                                                                                                                                                                                                                                                                                                                                                                                                                                                                                                                                                                                                                                                                   |                                                                                                                                                                |                                              |                                                                                                                                                           |                                                                                                                                                                                                                                                                                                                                                                                                                                                                                                                                                                                                                                                                                                                                                                                                                                                                                                                                                                         |                                                                                                                                                                                                                                                                                        |    |                         |
|---------------------------------------------------------------------------------------------------------------------------------------------------------|--------------------------------------------------------------------------------------------------------------------------------------------------------------------------------|------|-----------------------------------------------------------------------|--------------------------------------------------------------------------------------------------------------------------------------------------------------------------------------------------------------|------------------|-------------------------------------------------------------------------------------------------------------------------------------------------------------------------------------------------------|----------------------------------------------------------------------------------------------------------------------------------------------------------------------------------------------------------------------------------------------------------------------------------------------------------------------------------------------------------------------------------------------------------------------------------------------------------------------------------------------------------------------------------------------------------------------------------------------------------------------------------------------------------------------------------------------------|--------------------------------------------------------------------------------------------------------------------------------------------------------------------------|----|-------------------------------------------------------------------------------------------------------------------------------------------------------------------------------------------|---------------------------------------------------------------------------------------------------------------------|-----------------------------------------------------------------------------------------------------------------------------------------------------------------------------------------------------------------------------------------------------------------------------------------------------------------------------------------------------------------------------------------------------------------------------------------------------------------------------------------------------------------------------------------------------------------------------------------------------------------------------------------------|-------------------------------------------------------------------------------------------------------------------------------------------------------------------------------------------------------------------------------------------------------------------------------------------------------------------------------------------------------------------------------------------------------------------------------------------------------------------------------------------------------------------------------------------------------------------------------------------------------------------------------------------------------------------------------------------------------------------------------------------------------------------|----------------------------------------------------------------------------------------------------------------------------------------------------------------|----------------------------------------------|-----------------------------------------------------------------------------------------------------------------------------------------------------------|-------------------------------------------------------------------------------------------------------------------------------------------------------------------------------------------------------------------------------------------------------------------------------------------------------------------------------------------------------------------------------------------------------------------------------------------------------------------------------------------------------------------------------------------------------------------------------------------------------------------------------------------------------------------------------------------------------------------------------------------------------------------------------------------------------------------------------------------------------------------------------------------------------------------------------------------------------------------------|----------------------------------------------------------------------------------------------------------------------------------------------------------------------------------------------------------------------------------------------------------------------------------------|----|-------------------------|
| Head S.J.<br>Howell N.J.<br>Osnabrugge R.L.J.<br>Bridgewater B.<br>Keogh B.E.<br>Kinsman R.<br>Walton P.<br>Gummert J.F.<br>Pagano D.<br>Kappetein A.P. | The European association for cardio-thoracic surgery (EACTS) database. An introduction                                                                                         | 2013 | The European Association for Cardio-Thoracic Surgery (EACTS) Database | Adult cardiac surgery                                                                                                                                                                                        | European centres | Dendrite Clinical Systems Ltd. (Oxfordshire, UK) would take care of data management and analysis. The Database Committee, with oversight from the EACTS council, was installed to manage the database | This is a paper that provides an overview of the European Association for Cardio-Thoracic Surgery (EACTS) Database (UK is included). The registry aims to collect comprehensive data on the practice of European adult cardiac surgery, and disseminate information that it is easily accessible and understandable to the surgical community, patients and the general public. This will provide invaluable assistance to surgical teams when they are in negotiation with healthcare providers, enabling them to acquire the appropriate resources for their patients and allowing them to develop and hone surgical practice so as to ensure the continued improvement in outcomes for patients | EACTS planned to use the American STS dataset with several adaptations to suit the European population- this would be less time consuming and simpler for the EACTS team | NS | EACTS would use the American Society of Thoracic Surgeons dataset with adaptations to suit European demographics.                                                                         | Procedure performed, patient demographics, postoperative length of stay, all-cause mortality                        | Data import would be primarily organized through national registries the data would already have been cleaned and processed. Dendrite Clinical Systems Ltd hosted the database and took care of data management and analysis. Various logic checks and validation processes were applied by the Dendrite team to ensure that major problems with data or issues with formatting were identified. In some cases, extensive dialogue was required between Dendrite and the contributors to investigate potential problems and take the appropriate remedial action so that data could then be resubmitted in the correct format                 | The chairman of the EACTS committee sent an invitation to the chairmen of 23 national registries to ask them to participate. Invitation letters are still sent out every year to encourage past contributors to send their most recent data and to persuade more hospitals and countries to begin contributing. Using a web-based data submission tool with concomitant data validation checks and early recognition of errant or missing data could help to drive improvements in data quality and so increase the overall utility of the database. Complete data would provide accurate trend analysis and allow for proper risk-adjusted mortality analysis. One key requirement is that all participating centres standardize on one definition for mortality | For the last database report in 2009, data were available from 366 hospitals located in 29 countries. Data of 1 074 618 patients were included in the database | Publications, presentations, annual reports. | NS                                                                                                                                                        | Data import would be primarily organized through national registries - downside of this approach, could be that some countries might have a more advanced national registry than others, and the more established datasets might be significantly divergent from the requested dataset. In the current EACTS database, it is not appropriate to compare the mortality rates between countries, because adjustment for the types and complexity of patients and procedures cannot be performed adequately. The submitted data often did not represent the complete number of cases of a country, and it could not be determined what the percentage of submitted data was. Therefore, regional trends should be interpreted with caution. The percentage of missing data in the submissions from some countries is another area for potential improvement. A key area of improvement would be that all participating centres standardise on one definition for mortality | Provides good overview of cardiovascular surgical practice in Europe. Reports the safety and efficacy of procedures, assess the appropriateness of usage, benchmark outcomes, evaluate trends and variability, appraise governmental interventions and estimate healthcare expenditure | NS | All data are anonymised |
| Patrick H.<br>Sims A.<br>Burn J.<br>Bousfield D.<br>Colechin E.<br>Reay C.<br>Alderson N.<br>Goode S.<br>Cunningham D.<br>Campbell B.                   | Monitoring the use and outcomes of new devices and procedures: How does coding affect what Hospital Episode Statistics contribute? Lessons from 12 emerging procedures 2006-10 | 2013 | Hospital Episode Statistics (HES) data                                | Twelve interventional procedures were selected: 11 from published NICE Interventional Procedure Guidance (IPG) and one without NICE guidance (iliac artery stenting) but suggested by a professional society | NS               | NS                                                                                                                                                                                                    | The aims of this study were to assess the availability and accuracy of routinely available HES data as a tool to monitor the introduction of new interventional procedures into practice and to investigate whether the coverage of the data for individual procedures is affected by the complexity and specificity of their OPCS-4 codes                                                                                                                                                                                                                                                                                                                                                         | NS                                                                                                                                                                       | NS | HES uses the Office of Population Censuses and Survey (OPCS-4) Classification of Surgical Operations which is supported, maintained and developed by the NHS Classification Service (NCS) | Procedure type, number of procedures carried out per year, number of hospitals in which they were likely to be done | HES data were extracted for all 12 procedures, for 4 financial years (2006-10) based on year of finished consultant episode and were imported into a local, securely held, Structured Query Language database for analysis. National registers aim to achieve comprehensive coverage but they do not provide a 'gold standard data set' and therefore the sensitivity of data was analysed (i) using register data as the reference data set and then (ii) using HES data as the reference data set. As a check of data quality, prior to undertaking any detailed analysis, the quantity of relevant episodes of care in the HES extract was | NS                                                                                                                                                                                                                                                                                                                                                                                                                                                                                                                                                                                                                                                                                                                                                                | NS                                                                                                                                                             | NS                                           | Reason for lack of registry data may include the lack of resources to enable the data collection and submission, and scepticism about the quality of data | Can provide evidence on efficacy, safety and cost-effectiveness. Enables ongoing monitoring of new interventions. Enables NICE evaluation. Facilitated self audit and demonstrate continuing professional competency. Helps inform Health Service Commissioning decisions (with the ultimate aim of evaluating how resources used relate to services delivered and health improvements achieved)                                                                                                                                                                                                                                                                                                                                                                                                                                                                                                                                                                        | NS                                                                                                                                                                                                                                                                                     | NS |                         |

checked at an aggregate level against data available from the HESonline website. Our findings demonstrate that for procedures with simple specific codes (i.e. not requiring complex combinations of codes to describe the procedure), HES can accurately identify hospitals using new procedures and the numbers of those procedures undertaken. In contrast, HES data show poor specificity for procedures requiring complex combinations of OPCS coding. HES may help to identify hospitals that have not registered cases on national databases. HES data may be useful to improve the quality of national registers. For example, this has been successfully achieved in the National Bowel Cancer Audit Project by the Association of Coloproctology of Great Britain and Ireland, which used HES to check the coverage of the Audit, and the UK National Joint Register which demonstrated important variations in hip and knee replacement revision rates through linkage of its data to HES

For peer review only

1  
2  
3  
4  
5  
6  
7  
8  
9  
10  
11  
12  
13  
14  
15  
16  
17  
18  
19  
20  
21  
22  
23<sup>8</sup>  
24  
25  
26  
27  
28  
29  
30  
31  
32  
33  
34  
35  
36  
37  
38  
39  
40  
41  
42  
43  
44  
45  
46  
47  
48  
49

|                      |                                                               |      |                                        |                                                                           |                                                                                                                                                           |                                                                                                                                                               |                                                                                                         |                                                                                                                                                                                                                                                                                                                                       |                                                              |                                                                                                                                                                                                                                                                                                                            |                                                                                                                                                                                                                                                                                                                                                                                                 |    |                                                                                                                                                                                                                                                                                                                                                                                                                                                                                                                                                                                                                                                                                                                                                                                                                                                                                                                                                                                                                                                                                                                                                                                                                                                                                                                                                                                                                                                                                                                                                                                                                                                                                                                  |                                                                                                                                                                                                                                                                                                                                                                                                                                                                                                                                                                                                                                                                                    |                                                                                                                                                            |                                                                                                                                                                                                                                                                                                                  |                                                         |                                                                                                                                                                                                      |    |                                                                                                                                                                                                                                                                                                                           |
|----------------------|---------------------------------------------------------------|------|----------------------------------------|---------------------------------------------------------------------------|-----------------------------------------------------------------------------------------------------------------------------------------------------------|---------------------------------------------------------------------------------------------------------------------------------------------------------------|---------------------------------------------------------------------------------------------------------|---------------------------------------------------------------------------------------------------------------------------------------------------------------------------------------------------------------------------------------------------------------------------------------------------------------------------------------|--------------------------------------------------------------|----------------------------------------------------------------------------------------------------------------------------------------------------------------------------------------------------------------------------------------------------------------------------------------------------------------------------|-------------------------------------------------------------------------------------------------------------------------------------------------------------------------------------------------------------------------------------------------------------------------------------------------------------------------------------------------------------------------------------------------|----|------------------------------------------------------------------------------------------------------------------------------------------------------------------------------------------------------------------------------------------------------------------------------------------------------------------------------------------------------------------------------------------------------------------------------------------------------------------------------------------------------------------------------------------------------------------------------------------------------------------------------------------------------------------------------------------------------------------------------------------------------------------------------------------------------------------------------------------------------------------------------------------------------------------------------------------------------------------------------------------------------------------------------------------------------------------------------------------------------------------------------------------------------------------------------------------------------------------------------------------------------------------------------------------------------------------------------------------------------------------------------------------------------------------------------------------------------------------------------------------------------------------------------------------------------------------------------------------------------------------------------------------------------------------------------------------------------------------|------------------------------------------------------------------------------------------------------------------------------------------------------------------------------------------------------------------------------------------------------------------------------------------------------------------------------------------------------------------------------------------------------------------------------------------------------------------------------------------------------------------------------------------------------------------------------------------------------------------------------------------------------------------------------------|------------------------------------------------------------------------------------------------------------------------------------------------------------|------------------------------------------------------------------------------------------------------------------------------------------------------------------------------------------------------------------------------------------------------------------------------------------------------------------|---------------------------------------------------------|------------------------------------------------------------------------------------------------------------------------------------------------------------------------------------------------------|----|---------------------------------------------------------------------------------------------------------------------------------------------------------------------------------------------------------------------------------------------------------------------------------------------------------------------------|
| Welbourn R. Small P. | The UK national bariatric surgery registry. The second report | 2013 | UK National Bariatric Surgery Registry | Bariatric surgery: gastric bypass, gastric banding and sleeve gastrectomy | British Obesity and Metabolic Surgery Society (BOMSS), Association of laparoscopic surgeons, Association of Upper gastrointestinal surgeons and Dendrite. | Registry management by Dendrite clinical systems. Day to day administration by BOMSS. Oversight of the database design controlled by NBSR Database committee. | To provide a nationwide analysis of outcomes from bariatric and metabolic surgery in the UK and Ireland | Bespoke registry built by Dendrite. Hosted on a secure Dendrite server within the NHSNet N3 network. This N3 network has a fast link from any NHS computer that has NHS intranet access. The server also has a network card which gives secure access from outside the NHSNet, so that data can be entered from any private hospital. | No Public funding. Anticipates receiving funding from HQIUP. | There were 22 fields in the database that were absolutely required for meaningful data collection. The follow up data entry section allows for data capture of an unlimited amount of longitudinal data and the status of each comorbidity in detail so that the long term benefits of weight loss surgery can be assessed | Demographics, mortality, how each pt was funded, length of stay, complications, BMI pre-op, ASA, functional status, operating surgeon, type of operation, operative approach, co-morbidities, functional impairment, additional procedures, mortality data at the level of the individual surgeon, weight loss post op, change in co-morbidities post op, discharge date, discharge destination | NS | Missing data is inevitable when collecting large amounts of data, but can be minimised by careful registry design and well engaged participants. It takes less than eight minutes to complete the on-line database record. Volume of missing data is a reflection of following factors: 1) how accessible/available the information/data is to whoever enters the data 2) how important/useful the clinician believes the data to be 3) the clarity of the data definitions. To aid data collection, the system offers downloadable PDF forms for each section of the database and for each operation type - these forms can go in the patient notes and be filled in during the patient pathway - data can then be inputted into a computer when the patient is discharged. The data collected enables users to keep track of their cases, edit data, and follow up their patients. There has been an exponential growth in the number of data entry since 2006 - reflection on a) enthusiasm of bariatric surgeons b) 'continued yet slow growth' in the provision of services. Submission of data to the NBSR has recently become a condition for NHS commissioning of bariatric surgery so in the future the NBSR should contain data on all NHS funded bariatric surgery patients. This has increased number of contributing surgeons from 84 to 150 and number of contributing hospitals from 89 to 129. Whilst submission of data for privately funded patients is not yet mandatory, it is anticipated that data for most of these patients will be included. Colour coding system highlights records that are incomplete. Other tools have been used to make it easier to input data: multi-choice tick | 77% of UK Bariatric surgeons were entering data and upto 78% of NHS patients were being recorded into the registry. The degree of completeness for comorbidity data for the NBSR has improved over time. 80% had a complete set of comorbidity data recorded, and just over 10% had only 1 field missing. In the NBSR, it appeared that the comorbidity data entry points that were perceived to be more important were filled in more often than those perceived to be not as useful eg HTN had a high completeness rate, depression and liver disease had a lower completeness rate. 16283 surgical procedures recorded in the database (procedures performed between 2011-2013) | Annual reports. To conform with DOH, surgeons agreed for submitting and reporting of their own mortality data in the interest of openness and transparency | Weight loss surgery Information and Support (WLSInfo) - is a patient led charity. They were invited to contribute the introduction of the report. The charity was very happy to be involved and we reassured by the outcomes RE mortality, mobility and LOS. They were also reassured about their chosen surgeon | How to improve follow up of patients is a key challenge | Gives insight into trends of practice and overall outcomes. Help give information on clinical and cost effectiveness. Helps compare interventions in terms of outcomes. Helps provide follow up data | NS | Data are anonymised to comply with UK data protection laws. The registry is hosted on a secure Dendrite server. To gain access to data, add, edit data, each user must have their own ID and password. Each user can only see their own data. Access to the database as a whole is restricted to the system administrator |
|----------------------|---------------------------------------------------------------|------|----------------------------------------|---------------------------------------------------------------------------|-----------------------------------------------------------------------------------------------------------------------------------------------------------|---------------------------------------------------------------------------------------------------------------------------------------------------------------|---------------------------------------------------------------------------------------------------------|---------------------------------------------------------------------------------------------------------------------------------------------------------------------------------------------------------------------------------------------------------------------------------------------------------------------------------------|--------------------------------------------------------------|----------------------------------------------------------------------------------------------------------------------------------------------------------------------------------------------------------------------------------------------------------------------------------------------------------------------------|-------------------------------------------------------------------------------------------------------------------------------------------------------------------------------------------------------------------------------------------------------------------------------------------------------------------------------------------------------------------------------------------------|----|------------------------------------------------------------------------------------------------------------------------------------------------------------------------------------------------------------------------------------------------------------------------------------------------------------------------------------------------------------------------------------------------------------------------------------------------------------------------------------------------------------------------------------------------------------------------------------------------------------------------------------------------------------------------------------------------------------------------------------------------------------------------------------------------------------------------------------------------------------------------------------------------------------------------------------------------------------------------------------------------------------------------------------------------------------------------------------------------------------------------------------------------------------------------------------------------------------------------------------------------------------------------------------------------------------------------------------------------------------------------------------------------------------------------------------------------------------------------------------------------------------------------------------------------------------------------------------------------------------------------------------------------------------------------------------------------------------------|------------------------------------------------------------------------------------------------------------------------------------------------------------------------------------------------------------------------------------------------------------------------------------------------------------------------------------------------------------------------------------------------------------------------------------------------------------------------------------------------------------------------------------------------------------------------------------------------------------------------------------------------------------------------------------|------------------------------------------------------------------------------------------------------------------------------------------------------------|------------------------------------------------------------------------------------------------------------------------------------------------------------------------------------------------------------------------------------------------------------------------------------------------------------------|---------------------------------------------------------|------------------------------------------------------------------------------------------------------------------------------------------------------------------------------------------------------|----|---------------------------------------------------------------------------------------------------------------------------------------------------------------------------------------------------------------------------------------------------------------------------------------------------------------------------|

For peer review only

boxes, drop  
down lists,  
limiting free-text  
boxes as much  
as possible,  
hover tip prompts  
to assist users,  
auto-calculations  
(eg for BMI), on  
screen data  
validation  
checks, soft  
mandatory fields  
(so the user is  
warned of  
incomplete key  
fields when  
moving to  
another screen,  
automated  
production of  
operation notes  
and clinic letters,  
auto save  
features, visual  
cues to help  
users know  
which part of the  
database they  
are in (eg gastric  
bypass screen).  
During the follow  
up consultations,  
doctors and  
nurses can enter  
the follow-up  
data in real time  
during the clinic  
visit. The  
software can  
then generate an  
automated  
follow-up letter  
which will  
include  
procedure  
details, weight  
loss over time (as  
a graph),  
comorbidity  
status and  
progress

For peer review only

1  
2  
3  
4  
5  
6  
7  
8  
9  
10  
11  
12  
13  
14  
15  
16  
17  
18  
19  
20  
21  
22  
23  
24  
25  
26  
27  
28  
29  
30  
31  
32  
33  
34  
35  
36  
37  
38  
39  
40  
41  
42  
43  
44  
45  
46  
47  
48  
49



1  
2  
3  
4  
5  
6  
7  
8  
9  
10  
11  
12  
13  
14  
15  
16  
17  
18  
19  
20  
21  
22  
23  
24  
25  
26  
27  
28  
29  
30  
31  
32  
33  
34  
35  
36  
37  
38  
39  
40  
41  
42  
43  
44  
45  
46  
47  
48  
49

|             |                                                                                                                                                                              |      |                  |                                                 |    |                                                                                                                                                                                                                                                                                                                                                                                                                                                                                                                                                            |                                                                                                                                                                                                                                                                                                                                                                                                                                                                                                                                                                                                                                                                                                                                                             |                                                                                                                                                                                                                                                                                                                                                                                                                                                                                                                                                                                                                                                                                                     |    |                                                                                                                                                                                                                                                                                                                                                     |                                                                                                                                                                                                                                                                                                  |                                                                                                                                                                                                                                                                                                   |                                                                                                                                                                                                                                                                                                                                                                                                                                                                                                                                                                                                                                                                                                                                                                                                                                                                                                                                         |                                                                                                                                                                                                                                                                                                                                                                                                                                                                                                                                                                                                                                                                                                                                                                                                                                                                                                                                                                                                                                                                                                                                                                                                                                                                                                                                                 |                                                                                                                                                                                                                                                                                                                                                                                                                                                                                                                                                                                                                                                                               |                                                                                                                                     |    |                                                                                                                                                                                                                                                                                                                                                                                                                                                                                                                                                                                                                                                                                                                                                                                                                                    |                                                                                                                                       |                                       |                                                                                                                                                                                                                                                                                                                                                                                                                                   |    |
|-------------|------------------------------------------------------------------------------------------------------------------------------------------------------------------------------|------|------------------|-------------------------------------------------|----|------------------------------------------------------------------------------------------------------------------------------------------------------------------------------------------------------------------------------------------------------------------------------------------------------------------------------------------------------------------------------------------------------------------------------------------------------------------------------------------------------------------------------------------------------------|-------------------------------------------------------------------------------------------------------------------------------------------------------------------------------------------------------------------------------------------------------------------------------------------------------------------------------------------------------------------------------------------------------------------------------------------------------------------------------------------------------------------------------------------------------------------------------------------------------------------------------------------------------------------------------------------------------------------------------------------------------------|-----------------------------------------------------------------------------------------------------------------------------------------------------------------------------------------------------------------------------------------------------------------------------------------------------------------------------------------------------------------------------------------------------------------------------------------------------------------------------------------------------------------------------------------------------------------------------------------------------------------------------------------------------------------------------------------------------|----|-----------------------------------------------------------------------------------------------------------------------------------------------------------------------------------------------------------------------------------------------------------------------------------------------------------------------------------------------------|--------------------------------------------------------------------------------------------------------------------------------------------------------------------------------------------------------------------------------------------------------------------------------------------------|---------------------------------------------------------------------------------------------------------------------------------------------------------------------------------------------------------------------------------------------------------------------------------------------------|-----------------------------------------------------------------------------------------------------------------------------------------------------------------------------------------------------------------------------------------------------------------------------------------------------------------------------------------------------------------------------------------------------------------------------------------------------------------------------------------------------------------------------------------------------------------------------------------------------------------------------------------------------------------------------------------------------------------------------------------------------------------------------------------------------------------------------------------------------------------------------------------------------------------------------------------|-------------------------------------------------------------------------------------------------------------------------------------------------------------------------------------------------------------------------------------------------------------------------------------------------------------------------------------------------------------------------------------------------------------------------------------------------------------------------------------------------------------------------------------------------------------------------------------------------------------------------------------------------------------------------------------------------------------------------------------------------------------------------------------------------------------------------------------------------------------------------------------------------------------------------------------------------------------------------------------------------------------------------------------------------------------------------------------------------------------------------------------------------------------------------------------------------------------------------------------------------------------------------------------------------------------------------------------------------|-------------------------------------------------------------------------------------------------------------------------------------------------------------------------------------------------------------------------------------------------------------------------------------------------------------------------------------------------------------------------------------------------------------------------------------------------------------------------------------------------------------------------------------------------------------------------------------------------------------------------------------------------------------------------------|-------------------------------------------------------------------------------------------------------------------------------------|----|------------------------------------------------------------------------------------------------------------------------------------------------------------------------------------------------------------------------------------------------------------------------------------------------------------------------------------------------------------------------------------------------------------------------------------------------------------------------------------------------------------------------------------------------------------------------------------------------------------------------------------------------------------------------------------------------------------------------------------------------------------------------------------------------------------------------------------|---------------------------------------------------------------------------------------------------------------------------------------|---------------------------------------|-----------------------------------------------------------------------------------------------------------------------------------------------------------------------------------------------------------------------------------------------------------------------------------------------------------------------------------------------------------------------------------------------------------------------------------|----|
| Ludman P.F. | The UK transcatheter aortic valve implantation (TAVI) registry: one of the suite of registries hosted by the National Institute for Cardiovascular Outcomes Research (NICOR) | 2012 | UK TAVI Registry | Transcatheter Aortic Valve implantation surgery | NS | Collaborative approach between stakeholders, with representation from the professional specialist societies (cardiologists via the British Cardiovascular Intervention Society (BCIS), and cardiac surgeons via the Society of Cardiothoracic Surgeons (SCTS)), those involved in data collection and management (the former Central Cardiac Audit Database (CCAD) group, and representatives from the Department of Health (England), the National Specialist Commissioning Advisory Group, and the National Institute for Health and Clinical Excellence | TAVI Steering Group. The UK TAVI Group comprises four subgroups: the Steering Group, the Data Management Group (DMG), the Clinical Research Group and the Dataset Group. The Steering Group provides overarching intellectual and professional leadership, and oversight of the developing UK TAVI programme. The DMG acts as custodians of the data, with responsibility for planning analyses and helping in the development of scientific manuscripts. The DMG also acts as a review panel for initial screening of academic requests for access to the TAVI dataset. The role of the Clinical Research Group is to develop and encourage academic analysis of the TAVI database, with plans to develop risk modelling specific to this new intervention | To help guide the commissioning of procedures. To provide an accurate description of the way this evolving technology is being used to treat patients, to describe the results of this treatment and to be reassured that it is being undertaken as safely as possible. It is hoped that the registry will ultimately improve the care of patients by guiding therapy to those who will gain most benefit, and benchmarking TAVI units so that all can learn from the best practice of others. It is hoped that comprehensive clinical and outcome data, such as that collected since the first TAVI procedure was performed, may be used to inform the safe introduction of other new technologies | NS | Initial funding for the UK TAVI steering group was provided by the National Specialist Commissioning s. As a part of the NICOR suite of cardiovascular audits, additional resource and funding now comes from the Department of Health. The costs of local data entry are borne by the participating hospitals. Funding is independent of industry. | Need to achieve a balance between the size of the dataset and the willingness and ability of data entry teams to collect it accurately. The Dataset Group devised the original TAVI dataset of a UK RCT and is responsible for delivering new iterations and ensuring the change control process | Patient demographics, indicators for TAVI, risk factors for intervention, details of the operators, technical aspects of the procedure, and adverse outcomes, including complications up to the time of hospital discharge, there are six additional fields provided for 1- and 3-year follow-up. | TAVI data collection was initially run centrally by the CCAD (Central Cardiac Audit Database) team, along with its other major UK cardiac audits. In 2011, CCAD became part of the newly established National Institute for Cardiovascular Outcomes Research (NICOR), which, in addition to the TAVI registry, also hosts a number of other national cardiovascular registries. A web browser based interface has been developed to allow data entry and encrypted transfer to central servers at NICOR. This is available to all centres free of charge. For centres using their own database systems, all that is required is for these systems to generate a comma-separated-values file of a specified format. This can then be sent securely via the web browser interface to the NICOR servers. The National Health Service (NHS) number provides a unique identifier for any person registered with the NHS in England and Wales | Making commissioning of procedures conditional on data collection. Staff at NICOR provide telephone support via a help desk for technical issues and, together with the TAVI Steering Group members, respond to queries regarding case scenarios and definitions. A secure drop box can be used to analyse potential technical problems related to data uploads, file structures and field mapping errors. The commissioning framework in 2009 includes the following statement: 'Mandatory collection of key data will be required from all UK centres in which the procedure is undertaken, in the form of a registry. The registry will include all new patients undergoing the procedure, as well as those who have already received it. Continued funding of TAVI centres will be dependent on compliance with data collection and submission.' Thus, strong professional and commissioning pressure was applied to encourage data collection. In addition, some of the initial funding from the commissioners for the TAVI group was ring-fenced to provide support staff at NICOR whose main remit was to liaise with all TAVI centres and their data entry personnel to assist with timely and accurate data entry. A data completeness report is sent regularly to all centres so that areas for improvement can be readily identified | To date, very high levels of completeness have been achieved, with only one hospital failing to participate fully. For data relating to procedures undertaken before the end of 2010, completeness of valid data was 99.0% for demographic data, 96.4% for risk factors, 97.4% for procedural variables and 98.5% for in-hospital outcomes. Mortality tracking was achieved in 100%. There is no external data validation, however, range checks are applied to appropriate fields. Missing and extreme values and data inconsistencies are queried by direct contact with the TAVI centre. Reliance is placed on local data entry and clinical staff to ensure data accuracy | Initial publication efforts focused on the analysis of all data from the start of TAVI in the UK (2007) to the end of December 2009 | NS | Making changes to the dataset risks losing collection from some units whose ability to modify data collection software is limited. Other than mortality tracking, the accuracy and completeness of the data are dependent on the individual centre's efforts, and other than range checks and checks for internal validity, there are no external validation processes in place. While we believe that centres make great efforts to submit accurate data, the lack of validation in such registries does constitute a weakness. Also, apart from life status, later clinical and quality-of-life follow-up is limited. Nevertheless, planned linkage with the other NICOR registries will allow determination of many important future events, such as recurrent need for later cardiac and cardiothoracic surgical interventions | The main strengths are the inclusion of all consecutive patients treated in the UK, regardless of device manufacturer or access route | NS                                    | Researchers do not have access to any patient identifiers. A data-sharing agreement containing a data-governance framework has been created, and is available from the NICOR web site. Through this mechanism, the dataset is available to other research groups, under the guidance of the DMG (Data management group). The DMG acts as a review panel for initial screening of academic requests for access to the TAVI dataset |    |
| O'Dowd A.   | Government considers a national implant register in review of cosmetic procedures                                                                                            | 2012 | BMJ news article | Cosmetic surgery                                | NS | NS                                                                                                                                                                                                                                                                                                                                                                                                                                                                                                                                                         | BMJ News article that discusses regulation of cosmetic surgery interventions including a potential national register                                                                                                                                                                                                                                                                                                                                                                                                                                                                                                                                                                                                                                        | NS                                                                                                                                                                                                                                                                                                                                                                                                                                                                                                                                                                                                                                                                                                  | NS | NS                                                                                                                                                                                                                                                                                                                                                  | The information could include the date and place of the operation and the clinical outcome, as well as a method of identifying the patients who received the product                                                                                                                             | NS                                                                                                                                                                                                                                                                                                | NS                                                                                                                                                                                                                                                                                                                                                                                                                                                                                                                                                                                                                                                                                                                                                                                                                                                                                                                                      | NS                                                                                                                                                                                                                                                                                                                                                                                                                                                                                                                                                                                                                                                                                                                                                                                                                                                                                                                                                                                                                                                                                                                                                                                                                                                                                                                                              | NS                                                                                                                                                                                                                                                                                                                                                                                                                                                                                                                                                                                                                                                                            | NS                                                                                                                                  | NS | NS                                                                                                                                                                                                                                                                                                                                                                                                                                                                                                                                                                                                                                                                                                                                                                                                                                 | NS                                                                                                                                    | Can act to protect patients from harm | NS                                                                                                                                                                                                                                                                                                                                                                                                                                | NS |

|    |               |                                                                                                   |      |                         |                                     |    |                                                                                                                                                                                                                                                                                                                                                                             |                                                                                                                                                                                                                                                                                                                            |                  |    |    |                                                                                                                                                                                                                                                                                                                                                                                                  |                                                                                                                                                                                                                                                                                                                                                                                                                                                                                                                                                                                                        |                                                                                                                                                                                                                                                                                                                                                                                                 |                                                                                                                                                                                                                                                                                                                                                                                                                                                                                                                                                                                         |    |    |                                                                                                                                                                                                                                                                                                                                                           |                                                                                                                                                                                                                                      |    |                                                                                                                                                   |    |
|----|---------------|---------------------------------------------------------------------------------------------------|------|-------------------------|-------------------------------------|----|-----------------------------------------------------------------------------------------------------------------------------------------------------------------------------------------------------------------------------------------------------------------------------------------------------------------------------------------------------------------------------|----------------------------------------------------------------------------------------------------------------------------------------------------------------------------------------------------------------------------------------------------------------------------------------------------------------------------|------------------|----|----|--------------------------------------------------------------------------------------------------------------------------------------------------------------------------------------------------------------------------------------------------------------------------------------------------------------------------------------------------------------------------------------------------|--------------------------------------------------------------------------------------------------------------------------------------------------------------------------------------------------------------------------------------------------------------------------------------------------------------------------------------------------------------------------------------------------------------------------------------------------------------------------------------------------------------------------------------------------------------------------------------------------------|-------------------------------------------------------------------------------------------------------------------------------------------------------------------------------------------------------------------------------------------------------------------------------------------------------------------------------------------------------------------------------------------------|-----------------------------------------------------------------------------------------------------------------------------------------------------------------------------------------------------------------------------------------------------------------------------------------------------------------------------------------------------------------------------------------------------------------------------------------------------------------------------------------------------------------------------------------------------------------------------------------|----|----|-----------------------------------------------------------------------------------------------------------------------------------------------------------------------------------------------------------------------------------------------------------------------------------------------------------------------------------------------------------|--------------------------------------------------------------------------------------------------------------------------------------------------------------------------------------------------------------------------------------|----|---------------------------------------------------------------------------------------------------------------------------------------------------|----|
| 1  | Armitage J.N. | Percutaneous nephrolithotomy (PCNL) in the United Kingdom: Results of a prospective data registry | 2012 | BAUS PCNL data registry | Percutaneous nephrolithotomy (PCNL) | NS | The British Association of Urological Surgeons (BAUS)                                                                                                                                                                                                                                                                                                                       | To provide important information on current practice including outcome data for PCNL in the United Kingdom. To facilitate personal audit against national outcomes. To be used by surgeons when counselling patients about the treatment options for their renal stone. To establish national standards for this procedure | Web-based system | NS | NS | Unique patient identifier, demographics, procedural data. Effectiveness was measured using stone-free rates defined as "no visible stone on imaging." Stone-free rates were assessed intraoperatively, on the first postoperative day, and at outpatient review using radiography, complications, case complexity, operating surgeon, operating date. Stone characteristics, patient positioning | The registry is prospective, and surgeons are encouraged to submit data at the time of surgery and second complications as they arise. A possible method of improving case-mix adjustment would be through linkage of the data registry with the Hospital Episode Statistics (HES) database of the Department of Health. HES data could be used to validate registry data, verify completeness, and provide information on outcomes such as readmission rates, 30-d mortality, and long-term outcomes. This will help to inform standards and may allow the generation of national guidelines for PCNL | Advertising at national urological meetings. It is in surgeons' interests to ensure the data they submit are complete and accurate given that alternative and perhaps less reliable data sources may be used by others to evaluate their performance. Completeness is likely to improve as more urologists become aware of the data registry and a greater emphasis is placed on personal audit | January 1, 2010, and September 16, 2011, 57 consultant urologic surgeons from 50 centres contributed 987 patients who had 1028 PCNL procedures. Not fully complete data: In 2010, 485 records were added to the data registry. In a similar 1-yr period between April 1, 2009, and March 31, 2010, a study that used data from the Hospital Episode Statistics database of the Department of Health recorded 1732 PCNL procedures in England. Completeness is likely to improve as more urologists become aware of the data registry and a greater emphasis is placed on personal audit | NS | NS | Data is submitted voluntarily, therefore unlikely to capture all procedures. It is possible that those surgeons motivated to submit data to the registry had better outcomes than those who did not record their procedures, which may affect findings. The voluntary nature of data submission may have led to the underreporting of some complications. | BAUS PCNL data registry has provided an important insight into contemporary PCNL practice in the United Kingdom. It has helped to inform national outcomes for effectiveness and safety and will assist surgeons with personal audit | NS | An individual record that contained both a unique patient identifier and National Health Service (NHS) number was created for each PCNL procedure |    |
| 2  | Irving S.O.   |                                                                                                   |      |                         |                                     |    |                                                                                                                                                                                                                                                                                                                                                                             |                                                                                                                                                                                                                                                                                                                            |                  |    |    |                                                                                                                                                                                                                                                                                                                                                                                                  |                                                                                                                                                                                                                                                                                                                                                                                                                                                                                                                                                                                                        |                                                                                                                                                                                                                                                                                                                                                                                                 |                                                                                                                                                                                                                                                                                                                                                                                                                                                                                                                                                                                         |    |    |                                                                                                                                                                                                                                                                                                                                                           |                                                                                                                                                                                                                                      |    |                                                                                                                                                   |    |
| 3  | Burgess N.A.  |                                                                                                   |      |                         |                                     |    |                                                                                                                                                                                                                                                                                                                                                                             |                                                                                                                                                                                                                                                                                                                            |                  |    |    |                                                                                                                                                                                                                                                                                                                                                                                                  |                                                                                                                                                                                                                                                                                                                                                                                                                                                                                                                                                                                                        |                                                                                                                                                                                                                                                                                                                                                                                                 |                                                                                                                                                                                                                                                                                                                                                                                                                                                                                                                                                                                         |    |    |                                                                                                                                                                                                                                                                                                                                                           |                                                                                                                                                                                                                                      |    |                                                                                                                                                   |    |
| 4  |               |                                                                                                   |      |                         |                                     |    |                                                                                                                                                                                                                                                                                                                                                                             |                                                                                                                                                                                                                                                                                                                            |                  |    |    |                                                                                                                                                                                                                                                                                                                                                                                                  |                                                                                                                                                                                                                                                                                                                                                                                                                                                                                                                                                                                                        |                                                                                                                                                                                                                                                                                                                                                                                                 |                                                                                                                                                                                                                                                                                                                                                                                                                                                                                                                                                                                         |    |    |                                                                                                                                                                                                                                                                                                                                                           |                                                                                                                                                                                                                                      |    |                                                                                                                                                   |    |
| 5  |               |                                                                                                   |      |                         |                                     |    |                                                                                                                                                                                                                                                                                                                                                                             |                                                                                                                                                                                                                                                                                                                            |                  |    |    |                                                                                                                                                                                                                                                                                                                                                                                                  |                                                                                                                                                                                                                                                                                                                                                                                                                                                                                                                                                                                                        |                                                                                                                                                                                                                                                                                                                                                                                                 |                                                                                                                                                                                                                                                                                                                                                                                                                                                                                                                                                                                         |    |    |                                                                                                                                                                                                                                                                                                                                                           |                                                                                                                                                                                                                                      |    |                                                                                                                                                   |    |
| 6  |               |                                                                                                   |      |                         |                                     |    |                                                                                                                                                                                                                                                                                                                                                                             |                                                                                                                                                                                                                                                                                                                            |                  |    |    |                                                                                                                                                                                                                                                                                                                                                                                                  |                                                                                                                                                                                                                                                                                                                                                                                                                                                                                                                                                                                                        |                                                                                                                                                                                                                                                                                                                                                                                                 |                                                                                                                                                                                                                                                                                                                                                                                                                                                                                                                                                                                         |    |    |                                                                                                                                                                                                                                                                                                                                                           |                                                                                                                                                                                                                                      |    |                                                                                                                                                   |    |
| 7  |               |                                                                                                   |      |                         |                                     |    |                                                                                                                                                                                                                                                                                                                                                                             |                                                                                                                                                                                                                                                                                                                            |                  |    |    |                                                                                                                                                                                                                                                                                                                                                                                                  |                                                                                                                                                                                                                                                                                                                                                                                                                                                                                                                                                                                                        |                                                                                                                                                                                                                                                                                                                                                                                                 |                                                                                                                                                                                                                                                                                                                                                                                                                                                                                                                                                                                         |    |    |                                                                                                                                                                                                                                                                                                                                                           |                                                                                                                                                                                                                                      |    |                                                                                                                                                   |    |
| 8  |               |                                                                                                   |      |                         |                                     |    |                                                                                                                                                                                                                                                                                                                                                                             |                                                                                                                                                                                                                                                                                                                            |                  |    |    |                                                                                                                                                                                                                                                                                                                                                                                                  |                                                                                                                                                                                                                                                                                                                                                                                                                                                                                                                                                                                                        |                                                                                                                                                                                                                                                                                                                                                                                                 |                                                                                                                                                                                                                                                                                                                                                                                                                                                                                                                                                                                         |    |    |                                                                                                                                                                                                                                                                                                                                                           |                                                                                                                                                                                                                                      |    |                                                                                                                                                   |    |
| 9  |               |                                                                                                   |      |                         |                                     |    |                                                                                                                                                                                                                                                                                                                                                                             |                                                                                                                                                                                                                                                                                                                            |                  |    |    |                                                                                                                                                                                                                                                                                                                                                                                                  |                                                                                                                                                                                                                                                                                                                                                                                                                                                                                                                                                                                                        |                                                                                                                                                                                                                                                                                                                                                                                                 |                                                                                                                                                                                                                                                                                                                                                                                                                                                                                                                                                                                         |    |    |                                                                                                                                                                                                                                                                                                                                                           |                                                                                                                                                                                                                                      |    |                                                                                                                                                   |    |
| 10 |               |                                                                                                   |      |                         |                                     |    |                                                                                                                                                                                                                                                                                                                                                                             |                                                                                                                                                                                                                                                                                                                            |                  |    |    |                                                                                                                                                                                                                                                                                                                                                                                                  |                                                                                                                                                                                                                                                                                                                                                                                                                                                                                                                                                                                                        |                                                                                                                                                                                                                                                                                                                                                                                                 |                                                                                                                                                                                                                                                                                                                                                                                                                                                                                                                                                                                         |    |    |                                                                                                                                                                                                                                                                                                                                                           |                                                                                                                                                                                                                                      |    |                                                                                                                                                   |    |
| 11 |               |                                                                                                   |      |                         |                                     |    |                                                                                                                                                                                                                                                                                                                                                                             |                                                                                                                                                                                                                                                                                                                            |                  |    |    |                                                                                                                                                                                                                                                                                                                                                                                                  |                                                                                                                                                                                                                                                                                                                                                                                                                                                                                                                                                                                                        |                                                                                                                                                                                                                                                                                                                                                                                                 |                                                                                                                                                                                                                                                                                                                                                                                                                                                                                                                                                                                         |    |    |                                                                                                                                                                                                                                                                                                                                                           |                                                                                                                                                                                                                                      |    |                                                                                                                                                   |    |
| 12 |               |                                                                                                   |      |                         |                                     |    |                                                                                                                                                                                                                                                                                                                                                                             |                                                                                                                                                                                                                                                                                                                            |                  |    |    |                                                                                                                                                                                                                                                                                                                                                                                                  |                                                                                                                                                                                                                                                                                                                                                                                                                                                                                                                                                                                                        |                                                                                                                                                                                                                                                                                                                                                                                                 |                                                                                                                                                                                                                                                                                                                                                                                                                                                                                                                                                                                         |    |    |                                                                                                                                                                                                                                                                                                                                                           |                                                                                                                                                                                                                                      |    |                                                                                                                                                   |    |
| 13 |               |                                                                                                   |      |                         |                                     |    |                                                                                                                                                                                                                                                                                                                                                                             |                                                                                                                                                                                                                                                                                                                            |                  |    |    |                                                                                                                                                                                                                                                                                                                                                                                                  |                                                                                                                                                                                                                                                                                                                                                                                                                                                                                                                                                                                                        |                                                                                                                                                                                                                                                                                                                                                                                                 |                                                                                                                                                                                                                                                                                                                                                                                                                                                                                                                                                                                         |    |    |                                                                                                                                                                                                                                                                                                                                                           |                                                                                                                                                                                                                                      |    |                                                                                                                                                   |    |
| 14 |               |                                                                                                   |      |                         |                                     |    |                                                                                                                                                                                                                                                                                                                                                                             |                                                                                                                                                                                                                                                                                                                            |                  |    |    |                                                                                                                                                                                                                                                                                                                                                                                                  |                                                                                                                                                                                                                                                                                                                                                                                                                                                                                                                                                                                                        |                                                                                                                                                                                                                                                                                                                                                                                                 |                                                                                                                                                                                                                                                                                                                                                                                                                                                                                                                                                                                         |    |    |                                                                                                                                                                                                                                                                                                                                                           |                                                                                                                                                                                                                                      |    |                                                                                                                                                   |    |
| 15 |               |                                                                                                   |      |                         |                                     |    |                                                                                                                                                                                                                                                                                                                                                                             |                                                                                                                                                                                                                                                                                                                            |                  |    |    |                                                                                                                                                                                                                                                                                                                                                                                                  |                                                                                                                                                                                                                                                                                                                                                                                                                                                                                                                                                                                                        |                                                                                                                                                                                                                                                                                                                                                                                                 |                                                                                                                                                                                                                                                                                                                                                                                                                                                                                                                                                                                         |    |    |                                                                                                                                                                                                                                                                                                                                                           |                                                                                                                                                                                                                                      |    |                                                                                                                                                   |    |
| 16 |               |                                                                                                   |      |                         |                                     |    |                                                                                                                                                                                                                                                                                                                                                                             |                                                                                                                                                                                                                                                                                                                            |                  |    |    |                                                                                                                                                                                                                                                                                                                                                                                                  |                                                                                                                                                                                                                                                                                                                                                                                                                                                                                                                                                                                                        |                                                                                                                                                                                                                                                                                                                                                                                                 |                                                                                                                                                                                                                                                                                                                                                                                                                                                                                                                                                                                         |    |    |                                                                                                                                                                                                                                                                                                                                                           |                                                                                                                                                                                                                                      |    |                                                                                                                                                   |    |
| 17 |               |                                                                                                   |      |                         |                                     |    |                                                                                                                                                                                                                                                                                                                                                                             |                                                                                                                                                                                                                                                                                                                            |                  |    |    |                                                                                                                                                                                                                                                                                                                                                                                                  |                                                                                                                                                                                                                                                                                                                                                                                                                                                                                                                                                                                                        |                                                                                                                                                                                                                                                                                                                                                                                                 |                                                                                                                                                                                                                                                                                                                                                                                                                                                                                                                                                                                         |    |    |                                                                                                                                                                                                                                                                                                                                                           |                                                                                                                                                                                                                                      |    |                                                                                                                                                   |    |
| 18 |               |                                                                                                   |      |                         |                                     |    |                                                                                                                                                                                                                                                                                                                                                                             |                                                                                                                                                                                                                                                                                                                            |                  |    |    |                                                                                                                                                                                                                                                                                                                                                                                                  |                                                                                                                                                                                                                                                                                                                                                                                                                                                                                                                                                                                                        |                                                                                                                                                                                                                                                                                                                                                                                                 |                                                                                                                                                                                                                                                                                                                                                                                                                                                                                                                                                                                         |    |    |                                                                                                                                                                                                                                                                                                                                                           |                                                                                                                                                                                                                                      |    |                                                                                                                                                   |    |
| 19 |               |                                                                                                   |      |                         |                                     |    |                                                                                                                                                                                                                                                                                                                                                                             |                                                                                                                                                                                                                                                                                                                            |                  |    |    |                                                                                                                                                                                                                                                                                                                                                                                                  |                                                                                                                                                                                                                                                                                                                                                                                                                                                                                                                                                                                                        |                                                                                                                                                                                                                                                                                                                                                                                                 |                                                                                                                                                                                                                                                                                                                                                                                                                                                                                                                                                                                         |    |    |                                                                                                                                                                                                                                                                                                                                                           |                                                                                                                                                                                                                                      |    |                                                                                                                                                   |    |
| 20 |               |                                                                                                   |      |                         |                                     |    |                                                                                                                                                                                                                                                                                                                                                                             |                                                                                                                                                                                                                                                                                                                            |                  |    |    |                                                                                                                                                                                                                                                                                                                                                                                                  |                                                                                                                                                                                                                                                                                                                                                                                                                                                                                                                                                                                                        |                                                                                                                                                                                                                                                                                                                                                                                                 |                                                                                                                                                                                                                                                                                                                                                                                                                                                                                                                                                                                         |    |    |                                                                                                                                                                                                                                                                                                                                                           |                                                                                                                                                                                                                                      |    |                                                                                                                                                   |    |
| 21 |               |                                                                                                   |      |                         |                                     |    |                                                                                                                                                                                                                                                                                                                                                                             |                                                                                                                                                                                                                                                                                                                            |                  |    |    |                                                                                                                                                                                                                                                                                                                                                                                                  |                                                                                                                                                                                                                                                                                                                                                                                                                                                                                                                                                                                                        |                                                                                                                                                                                                                                                                                                                                                                                                 |                                                                                                                                                                                                                                                                                                                                                                                                                                                                                                                                                                                         |    |    |                                                                                                                                                                                                                                                                                                                                                           |                                                                                                                                                                                                                                      |    |                                                                                                                                                   |    |
| 22 | Goldberg A.J. | An information revolution in orthopaedics                                                         | 2012 | Review article          | NS                                  | NS | Clinicians must be involved in registry development. It is important for clinicians, the Royal Colleges and specialist associations in influencing the wider processes of data capture now, to ensure that the data are of good quality and accurate, so that clinicians can be judged appropriately. DOH and government must also be involved in registry process as well. | This review looks at the sources, quality and interpretation of the electronic databases, as well as the potential benefits for surgeons and their patients                                                                                                                                                                | NS               | NS | NS | NS                                                                                                                                                                                                                                                                                                                                                                                               | NS                                                                                                                                                                                                                                                                                                                                                                                                                                                                                                                                                                                                     | NS                                                                                                                                                                                                                                                                                                                                                                                              | NS                                                                                                                                                                                                                                                                                                                                                                                                                                                                                                                                                                                      | NS | NS | NS                                                                                                                                                                                                                                                                                                                                                        | NS                                                                                                                                                                                                                                   | NS | NS                                                                                                                                                | NS |
| 23 | MacGregor A.  |                                                                                                   |      |                         |                                     |    |                                                                                                                                                                                                                                                                                                                                                                             |                                                                                                                                                                                                                                                                                                                            |                  |    |    |                                                                                                                                                                                                                                                                                                                                                                                                  |                                                                                                                                                                                                                                                                                                                                                                                                                                                                                                                                                                                                        |                                                                                                                                                                                                                                                                                                                                                                                                 |                                                                                                                                                                                                                                                                                                                                                                                                                                                                                                                                                                                         |    |    |                                                                                                                                                                                                                                                                                                                                                           |                                                                                                                                                                                                                                      |    |                                                                                                                                                   |    |
| 24 | Spencer S.A.  |                                                                                                   |      |                         |                                     |    |                                                                                                                                                                                                                                                                                                                                                                             |                                                                                                                                                                                                                                                                                                                            |                  |    |    |                                                                                                                                                                                                                                                                                                                                                                                                  |                                                                                                                                                                                                                                                                                                                                                                                                                                                                                                                                                                                                        |                                                                                                                                                                                                                                                                                                                                                                                                 |                                                                                                                                                                                                                                                                                                                                                                                                                                                                                                                                                                                         |    |    |                                                                                                                                                                                                                                                                                                                                                           |                                                                                                                                                                                                                                      |    |                                                                                                                                                   |    |
| 25 |               |                                                                                                   |      |                         |                                     |    |                                                                                                                                                                                                                                                                                                                                                                             |                                                                                                                                                                                                                                                                                                                            |                  |    |    |                                                                                                                                                                                                                                                                                                                                                                                                  |                                                                                                                                                                                                                                                                                                                                                                                                                                                                                                                                                                                                        |                                                                                                                                                                                                                                                                                                                                                                                                 |                                                                                                                                                                                                                                                                                                                                                                                                                                                                                                                                                                                         |    |    |                                                                                                                                                                                                                                                                                                                                                           |                                                                                                                                                                                                                                      |    |                                                                                                                                                   |    |
| 26 |               |                                                                                                   |      |                         |                                     |    |                                                                                                                                                                                                                                                                                                                                                                             |                                                                                                                                                                                                                                                                                                                            |                  |    |    |                                                                                                                                                                                                                                                                                                                                                                                                  |                                                                                                                                                                                                                                                                                                                                                                                                                                                                                                                                                                                                        |                                                                                                                                                                                                                                                                                                                                                                                                 |                                                                                                                                                                                                                                                                                                                                                                                                                                                                                                                                                                                         |    |    |                                                                                                                                                                                                                                                                                                                                                           |                                                                                                                                                                                                                                      |    |                                                                                                                                                   |    |
| 27 |               |                                                                                                   |      |                         |                                     |    |                                                                                                                                                                                                                                                                                                                                                                             |                                                                                                                                                                                                                                                                                                                            |                  |    |    |                                                                                                                                                                                                                                                                                                                                                                                                  |                                                                                                                                                                                                                                                                                                                                                                                                                                                                                                                                                                                                        |                                                                                                                                                                                                                                                                                                                                                                                                 |                                                                                                                                                                                                                                                                                                                                                                                                                                                                                                                                                                                         |    |    |                                                                                                                                                                                                                                                                                                                                                           |                                                                                                                                                                                                                                      |    |                                                                                                                                                   |    |
| 28 |               |                                                                                                   |      |                         |                                     |    |                                                                                                                                                                                                                                                                                                                                                                             |                                                                                                                                                                                                                                                                                                                            |                  |    |    |                                                                                                                                                                                                                                                                                                                                                                                                  |                                                                                                                                                                                                                                                                                                                                                                                                                                                                                                                                                                                                        |                                                                                                                                                                                                                                                                                                                                                                                                 |                                                                                                                                                                                                                                                                                                                                                                                                                                                                                                                                                                                         |    |    |                                                                                                                                                                                                                                                                                                                                                           |                                                                                                                                                                                                                                      |    |                                                                                                                                                   |    |
| 29 |               |                                                                                                   |      |                         |                                     |    |                                                                                                                                                                                                                                                                                                                                                                             |                                                                                                                                                                                                                                                                                                                            |                  |    |    |                                                                                                                                                                                                                                                                                                                                                                                                  |                                                                                                                                                                                                                                                                                                                                                                                                                                                                                                                                                                                                        |                                                                                                                                                                                                                                                                                                                                                                                                 |                                                                                                                                                                                                                                                                                                                                                                                                                                                                                                                                                                                         |    |    |                                                                                                                                                                                                                                                                                                                                                           |                                                                                                                                                                                                                                      |    |                                                                                                                                                   |    |
| 30 |               |                                                                                                   |      |                         |                                     |    |                                                                                                                                                                                                                                                                                                                                                                             |                                                                                                                                                                                                                                                                                                                            |                  |    |    |                                                                                                                                                                                                                                                                                                                                                                                                  |                                                                                                                                                                                                                                                                                                                                                                                                                                                                                                                                                                                                        |                                                                                                                                                                                                                                                                                                                                                                                                 |                                                                                                                                                                                                                                                                                                                                                                                                                                                                                                                                                                                         |    |    |                                                                                                                                                                                                                                                                                                                                                           |                                                                                                                                                                                                                                      |    |                                                                                                                                                   |    |
| 31 |               |                                                                                                   |      |                         |                                     |    |                                                                                                                                                                                                                                                                                                                                                                             |                                                                                                                                                                                                                                                                                                                            |                  |    |    |                                                                                                                                                                                                                                                                                                                                                                                                  |                                                                                                                                                                                                                                                                                                                                                                                                                                                                                                                                                                                                        |                                                                                                                                                                                                                                                                                                                                                                                                 |                                                                                                                                                                                                                                                                                                                                                                                                                                                                                                                                                                                         |    |    |                                                                                                                                                                                                                                                                                                                                                           |                                                                                                                                                                                                                                      |    |                                                                                                                                                   |    |
| 32 |               |                                                                                                   |      |                         |                                     |    |                                                                                                                                                                                                                                                                                                                                                                             |                                                                                                                                                                                                                                                                                                                            |                  |    |    |                                                                                                                                                                                                                                                                                                                                                                                                  |                                                                                                                                                                                                                                                                                                                                                                                                                                                                                                                                                                                                        |                                                                                                                                                                                                                                                                                                                                                                                                 |                                                                                                                                                                                                                                                                                                                                                                                                                                                                                                                                                                                         |    |    |                                                                                                                                                                                                                                                                                                                                                           |                                                                                                                                                                                                                                      |    |                                                                                                                                                   |    |
| 33 |               |                                                                                                   |      |                         |                                     |    |                                                                                                                                                                                                                                                                                                                                                                             |                                                                                                                                                                                                                                                                                                                            |                  |    |    |                                                                                                                                                                                                                                                                                                                                                                                                  |                                                                                                                                                                                                                                                                                                                                                                                                                                                                                                                                                                                                        |                                                                                                                                                                                                                                                                                                                                                                                                 |                                                                                                                                                                                                                                                                                                                                                                                                                                                                                                                                                                                         |    |    |                                                                                                                                                                                                                                                                                                                                                           |                                                                                                                                                                                                                                      |    |                                                                                                                                                   |    |
| 34 |               |                                                                                                   |      |                         |                                     |    |                                                                                                                                                                                                                                                                                                                                                                             |                                                                                                                                                                                                                                                                                                                            |                  |    |    |                                                                                                                                                                                                                                                                                                                                                                                                  |                                                                                                                                                                                                                                                                                                                                                                                                                                                                                                                                                                                                        |                                                                                                                                                                                                                                                                                                                                                                                                 |                                                                                                                                                                                                                                                                                                                                                                                                                                                                                                                                                                                         |    |    |                                                                                                                                                                                                                                                                                                                                                           |                                                                                                                                                                                                                                      |    |                                                                                                                                                   |    |
| 35 |               |                                                                                                   |      |                         |                                     |    |                                                                                                                                                                                                                                                                                                                                                                             |                                                                                                                                                                                                                                                                                                                            |                  |    |    |                                                                                                                                                                                                                                                                                                                                                                                                  |                                                                                                                                                                                                                                                                                                                                                                                                                                                                                                                                                                                                        |                                                                                                                                                                                                                                                                                                                                                                                                 |                                                                                                                                                                                                                                                                                                                                                                                                                                                                                                                                                                                         |    |    |                                                                                                                                                                                                                                                                                                                                                           |                                                                                                                                                                                                                                      |    |                                                                                                                                                   |    |
| 36 |               |                                                                                                   |      |                         |                                     |    |                                                                                                                                                                                                                                                                                                                                                                             |                                                                                                                                                                                                                                                                                                                            |                  |    |    |                                                                                                                                                                                                                                                                                                                                                                                                  |                                                                                                                                                                                                                                                                                                                                                                                                                                                                                                                                                                                                        |                                                                                                                                                                                                                                                                                                                                                                                                 |                                                                                                                                                                                                                                                                                                                                                                                                                                                                                                                                                                                         |    |    |                                                                                                                                                                                                                                                                                                                                                           |                                                                                                                                                                                                                                      |    |                                                                                                                                                   |    |
| 37 |               |                                                                                                   |      |                         |                                     |    |                                                                                                                                                                                                                                                                                                                                                                             |                                                                                                                                                                                                                                                                                                                            |                  |    |    |                                                                                                                                                                                                                                                                                                                                                                                                  |                                                                                                                                                                                                                                                                                                                                                                                                                                                                                                                                                                                                        |                                                                                                                                                                                                                                                                                                                                                                                                 |                                                                                                                                                                                                                                                                                                                                                                                                                                                                                                                                                                                         |    |    |                                                                                                                                                                                                                                                                                                                                                           |                                                                                                                                                                                                                                      |    |                                                                                                                                                   |    |
| 38 |               |                                                                                                   |      |                         |                                     |    |                                                                                                                                                                                                                                                                                                                                                                             |                                                                                                                                                                                                                                                                                                                            |                  |    |    |                                                                                                                                                                                                                                                                                                                                                                                                  |                                                                                                                                                                                                                                                                                                                                                                                                                                                                                                                                                                                                        |                                                                                                                                                                                                                                                                                                                                                                                                 |                                                                                                                                                                                                                                                                                                                                                                                                                                                                                                                                                                                         |    |    |                                                                                                                                                                                                                                                                                                                                                           |                                                                                                                                                                                                                                      |    |                                                                                                                                                   |    |
| 39 |               |                                                                                                   |      |                         |                                     |    |                                                                                                                                                                                                                                                                                                                                                                             |                                                                                                                                                                                                                                                                                                                            |                  |    |    |                                                                                                                                                                                                                                                                                                                                                                                                  |                                                                                                                                                                                                                                                                                                                                                                                                                                                                                                                                                                                                        |                                                                                                                                                                                                                                                                                                                                                                                                 |                                                                                                                                                                                                                                                                                                                                                                                                                                                                                                                                                                                         |    |    |                                                                                                                                                                                                                                                                                                                                                           |                                                                                                                                                                                                                                      |    |                                                                                                                                                   |    |
| 40 |               |                                                                                                   |      |                         |                                     |    |                                                                                                                                                                                                                                                                                                                                                                             |                                                                                                                                                                                                                                                                                                                            |                  |    |    |                                                                                                                                                                                                                                                                                                                                                                                                  |                                                                                                                                                                                                                                                                                                                                                                                                                                                                                                                                                                                                        |                                                                                                                                                                                                                                                                                                                                                                                                 |                                                                                                                                                                                                                                                                                                                                                                                                                                                                                                                                                                                         |    |    |                                                                                                                                                                                                                                                                                                                                                           |                                                                                                                                                                                                                                      |    |                                                                                                                                                   |    |
| 41 |               |                                                                                                   |      |                         |                                     |    |                                                                                                                                                                                                                                                                                                                                                                             |                                                                                                                                                                                                                                                                                                                            |                  |    |    |                                                                                                                                                                                                                                                                                                                                                                                                  |                                                                                                                                                                                                                                                                                                                                                                                                                                                                                                                                                                                                        |                                                                                                                                                                                                                                                                                                                                                                                                 |                                                                                                                                                                                                                                                                                                                                                                                                                                                                                                                                                                                         |    |    |                                                                                                                                                                                                                                                                                                                                                           |                                                                                                                                                                                                                                      |    |                                                                                                                                                   |    |
| 42 |               |                                                                                                   |      |                         |                                     |    |                                                                                                                                                                                                                                                                                                                                                                             |                                                                                                                                                                                                                                                                                                                            |                  |    |    |                                                                                                                                                                                                                                                                                                                                                                                                  |                                                                                                                                                                                                                                                                                                                                                                                                                                                                                                                                                                                                        |                                                                                                                                                                                                                                                                                                                                                                                                 |                                                                                                                                                                                                                                                                                                                                                                                                                                                                                                                                                                                         |    |    |                                                                                                                                                                                                                                                                                                                                                           |                                                                                                                                                                                                                                      |    |                                                                                                                                                   |    |
| 43 |               |                                                                                                   |      |                         |                                     |    |                                                                                                                                                                                                                                                                                                                                                                             |                                                                                                                                                                                                                                                                                                                            |                  |    |    |                                                                                                                                                                                                                                                                                                                                                                                                  |                                                                                                                                                                                                                                                                                                                                                                                                                                                                                                                                                                                                        |                                                                                                                                                                                                                                                                                                                                                                                                 |                                                                                                                                                                                                                                                                                                                                                                                                                                                                                                                                                                                         |    |    |                                                                                                                                                                                                                                                                                                                                                           |                                                                                                                                                                                                                                      |    |                                                                                                                                                   |    |
| 44 |               |                                                                                                   |      |                         |                                     |    |                                                                                                                                                                                                                                                                                                                                                                             |                                                                                                                                                                                                                                                                                                                            |                  |    |    |                                                                                                                                                                                                                                                                                                                                                                                                  |                                                                                                                                                                                                                                                                                                                                                                                                                                                                                                                                                                                                        |                                                                                                                                                                                                                                                                                                                                                                                                 |                                                                                                                                                                                                                                                                                                                                                                                                                                                                                                                                                                                         |    |    |                                                                                                                                                                                                                                                                                                                                                           |                                                                                                                                                                                                                                      |    |                                                                                                                                                   |    |
| 45 |               |                                                                                                   |      |                         |                                     |    |                                                                                                                                                                                                                                                                                                                                                                             |                                                                                                                                                                                                                                                                                                                            |                  |    |    |                                                                                                                                                                                                                                                                                                                                                                                                  |                                                                                                                                                                                                                                                                                                                                                                                                                                                                                                                                                                                                        |                                                                                                                                                                                                                                                                                                                                                                                                 |                                                                                                                                                                                                                                                                                                                                                                                                                                                                                                                                                                                         |    |    |                                                                                                                                                                                                                                                                                                                                                           |                                                                                                                                                                                                                                      |    |                                                                                                                                                   |    |
| 46 |               |                                                                                                   |      |                         |                                     |    |                                                                                                                                                                                                                                                                                                                                                                             |                                                                                                                                                                                                                                                                                                                            |                  |    |    |                                                                                                                                                                                                                                                                                                                                                                                                  |                                                                                                                                                                                                                                                                                                                                                                                                                                                                                                                                                                                                        |                                                                                                                                                                                                                                                                                                                                                                                                 |                                                                                                                                                                                                                                                                                                                                                                                                                                                                                                                                                                                         |    |    |                                                                                                                                                                                                                                                                                                                                                           |                                                                                                                                                                                                                                      |    |                                                                                                                                                   |    |
| 47 |               |                                                                                                   |      |                         |                                     |    |                                                                                                                                                                                                                                                                                                                                                                             |                                                                                                                                                                                                                                                                                                                            |                  |    |    |                                                                                                                                                                                                                                                                                                                                                                                                  |                                                                                                                                                                                                                                                                                                                                                                                                                                                                                                                                                                                                        |                                                                                                                                                                                                                                                                                                                                                                                                 |                                                                                                                                                                                                                                                                                                                                                                                                                                                                                                                                                                                         |    |    |                                                                                                                                                                                                                                                                                                                                                           |                                                                                                                                                                                                                                      |    |                                                                                                                                                   |    |
| 48 |               |                                                                                                   |      |                         |                                     |    |                                                                                                                                                                                                                                                                                                                                                                             |                                                                                                                                                                                                                                                                                                                            |                  |    |    |                                                                                                                                                                                                                                                                                                                                                                                                  |                                                                                                                                                                                                                                                                                                                                                                                                                                                                                                                                                                                                        |                                                                                                                                                                                                                                                                                                                                                                                                 |                                                                                                                                                                                                                                                                                                                                                                                                                                                                                                                                                                                         |    |    |                                                                                                                                                                                                                                                                                                                                                           |                                                                                                                                                                                                                                      |    |                                                                                                                                                   |    |
| 49 |               |                                                                                                   |      |                         |                                     |    |                                                                                                                                                                                                                                                                                                                                                                             |                                                                                                                                                                                                                                                                                                                            |                  |    |    |                                                                                                                                                                                                                                                                                                                                                                                                  |                                                                                                                                                                                                                                                                                                                                                                                                                                                                                                                                                                                                        |                                                                                                                                                                                                                                                                                                                                                                                                 |                                                                                                                                                                                                                                                                                                                                                                                                                                                                                                                                                                                         |    |    |                                                                                                                                                                                                                                                                                                                                                           |                                                                                                                                                                                                                                      |    |                                                                                                                                                   |    |

For peer review only

1  
2  
3  
4  
5  
6  
7  
8  
9  
10  
11  
12  
13  
14  
15  
16  
17  
18  
19  
20  
21  
22  
23  
24  
25  
26  
27  
28  
29  
30  
31  
32  
33  
34  
35  
36  
37  
38  
39  
40  
41  
42  
43  
44  
45  
46  
47  
48  
49

For peer review only

|           |                                                                                            |      |                                               |                                                                          |    |                                                    |                                                                                                                                  |                  |                                                               |    |                                                                                                                                                                                                                                                                         |                                                                                                                                                                   |                                                                                                                                                                               |                                                                                                                                                   |    |    |                                                                                                                                                                                                                                                                                                                                                                                                                                                                                                                                                                                                                                                                                                                                                                     |    |    |    |
|-----------|--------------------------------------------------------------------------------------------|------|-----------------------------------------------|--------------------------------------------------------------------------|----|----------------------------------------------------|----------------------------------------------------------------------------------------------------------------------------------|------------------|---------------------------------------------------------------|----|-------------------------------------------------------------------------------------------------------------------------------------------------------------------------------------------------------------------------------------------------------------------------|-------------------------------------------------------------------------------------------------------------------------------------------------------------------|-------------------------------------------------------------------------------------------------------------------------------------------------------------------------------|---------------------------------------------------------------------------------------------------------------------------------------------------|----|----|---------------------------------------------------------------------------------------------------------------------------------------------------------------------------------------------------------------------------------------------------------------------------------------------------------------------------------------------------------------------------------------------------------------------------------------------------------------------------------------------------------------------------------------------------------------------------------------------------------------------------------------------------------------------------------------------------------------------------------------------------------------------|----|----|----|
| Uberoi R. | British society of interventional radiology. Biliary drainage and stenting registry (BDSR) | 2012 | Biliary Drainage and Stenting Registry (BDSR) | Percutaneous biliary drainage (PTBD) with or without adjunctive stenting | NS | British Society of Interventional Radiology (BSIR) | To assess current practice in the United Kingdom and use the data collected to provide guidance for improvements in patient care | Web-based system | The registry was funded by the BSIR on behalf of its members. | NS | Demographic, pre- and postintervention laboratory data, technical and clinical outcomes at discharge, known diagnosis, indications for procedure, procedural information, antibiotic prophylaxis, general anaesthetic/sedation, complications (morbidity and mortality) | Collection and analysis was performed by Dendrite Clinical Systems Ltd, utilising Microsoft Access, Excel, and Crystal Reports XI from business objects software. | Appropriate time and resources need to be allocated to allow good quality data collection, which should form an essential part of medical practice to maintain high standards | From November 1, 2006 to August 19, 2009: 833 procedures were recorded and entered by 62 operators from 44 institutions within the United Kingdom | NS | NS | Time pressures and other NHS commitments act as a disincentive. One of the major deficiencies of the registry was that the cause of death was not established, this will be one of the goals of future data collection and analysis. Data quality and completeness is a significant concern in this registry, which represents a prospective voluntary data collection. A criticism of voluntary registries is that data entry often is incomplete and they represent a nonconsecutive patient group and may not be representative of the entire treated patient population. It is likely that some questions and the terminology used were not clear to all operators. For example, operators were asked to stratify patients' complications into minor and major. | NS | NS | NS |
|-----------|--------------------------------------------------------------------------------------------|------|-----------------------------------------------|--------------------------------------------------------------------------|----|----------------------------------------------------|----------------------------------------------------------------------------------------------------------------------------------|------------------|---------------------------------------------------------------|----|-------------------------------------------------------------------------------------------------------------------------------------------------------------------------------------------------------------------------------------------------------------------------|-------------------------------------------------------------------------------------------------------------------------------------------------------------------|-------------------------------------------------------------------------------------------------------------------------------------------------------------------------------|---------------------------------------------------------------------------------------------------------------------------------------------------|----|----|---------------------------------------------------------------------------------------------------------------------------------------------------------------------------------------------------------------------------------------------------------------------------------------------------------------------------------------------------------------------------------------------------------------------------------------------------------------------------------------------------------------------------------------------------------------------------------------------------------------------------------------------------------------------------------------------------------------------------------------------------------------------|----|----|----|

Trusts rely on clinical coders to extract information from unstructured medical records, and although this professional group has considerable expertise, selection of the most clinically appropriate codes requires close contact with clinicians. The rarely happens in the NHS. The electronic data collection process needs to be tempered with caution and that the right design for the system is crucial. A common thread among information technology (IT) projects in health has been their combination of ambition and limited appreciation of scale. This has perhaps been most apparent in the United Kingdom's £11.4 billion National Programme for IT, later renamed Connecting for Health. It is disappointing that the ambition of the project was not matched by delivery. In 2011 the National Audit Office concluded that the programme, as initially conceived, will now never be delivered

improve care, as demonstrated by the cardiac surgeons from England who now boast one of the lowest mortality rates for cardiac surgery in Europe. Data matter because they are used by employers to make management decisions; by commissioners to determine how much money to pay for services; and by the government for its various schemes, such as NHS Choices. This is happening now, and in the future data will be increasingly used to assess the quality of services provided by hospitals, departments, and most likely eventually individual surgeons. Data can be gathered to assist in management discussions, such as departmental workload and resource planning, and for the purposes of audit and research. Most importantly, good data will enable clinicians and departments to improve their practice and the care they give

|    |              |                                                                               |      |                                                         |    |    |    |                                                                                                                        |    |    |    |    |    |    |    |    |    |    |    |    |    |    |
|----|--------------|-------------------------------------------------------------------------------|------|---------------------------------------------------------|----|----|----|------------------------------------------------------------------------------------------------------------------------|----|----|----|----|----|----|----|----|----|----|----|----|----|----|
| 1  | Larsson S.   | Use of 13 disease registries in 5 countries                                   | 2012 | A review of 13 registries in 5 countries (including UK) | NS | NS | NS | To learn how registries function and to identify any mechanisms by which they are able to influence clinical practice. | NS | NS | NS | NS | NS | NS | NS | NS | NS | NS | NS | NS | NS | NS |
| 2  | Lawyer P.    |                                                                               |      |                                                         |    |    |    |                                                                                                                        |    |    |    |    |    |    |    |    |    |    |    |    |    |    |
| 3  | Garelick G.  | demonstrates the potential to use outcome data to improve health care's value |      |                                                         |    |    |    |                                                                                                                        |    |    |    |    |    |    |    |    |    |    |    |    |    |    |
| 4  | Lindahl B.   |                                                                               |      |                                                         |    |    |    |                                                                                                                        |    |    |    |    |    |    |    |    |    |    |    |    |    |    |
| 5  | Lundstrom M. |                                                                               |      |                                                         |    |    |    |                                                                                                                        |    |    |    |    |    |    |    |    |    |    |    |    |    |    |
| 6  |              |                                                                               |      |                                                         |    |    |    |                                                                                                                        |    |    |    |    |    |    |    |    |    |    |    |    |    |    |
| 7  |              |                                                                               |      |                                                         |    |    |    |                                                                                                                        |    |    |    |    |    |    |    |    |    |    |    |    |    |    |
| 8  |              |                                                                               |      |                                                         |    |    |    |                                                                                                                        |    |    |    |    |    |    |    |    |    |    |    |    |    |    |
| 9  |              |                                                                               |      |                                                         |    |    |    |                                                                                                                        |    |    |    |    |    |    |    |    |    |    |    |    |    |    |
| 10 |              |                                                                               |      |                                                         |    |    |    |                                                                                                                        |    |    |    |    |    |    |    |    |    |    |    |    |    |    |
| 11 |              |                                                                               |      |                                                         |    |    |    |                                                                                                                        |    |    |    |    |    |    |    |    |    |    |    |    |    |    |
| 12 |              |                                                                               |      |                                                         |    |    |    |                                                                                                                        |    |    |    |    |    |    |    |    |    |    |    |    |    |    |
| 13 |              |                                                                               |      |                                                         |    |    |    |                                                                                                                        |    |    |    |    |    |    |    |    |    |    |    |    |    |    |
| 14 |              |                                                                               |      |                                                         |    |    |    |                                                                                                                        |    |    |    |    |    |    |    |    |    |    |    |    |    |    |
| 15 |              |                                                                               |      |                                                         |    |    |    |                                                                                                                        |    |    |    |    |    |    |    |    |    |    |    |    |    |    |
| 16 |              |                                                                               |      |                                                         |    |    |    |                                                                                                                        |    |    |    |    |    |    |    |    |    |    |    |    |    |    |
| 17 |              |                                                                               |      |                                                         |    |    |    |                                                                                                                        |    |    |    |    |    |    |    |    |    |    |    |    |    |    |
| 18 |              |                                                                               |      |                                                         |    |    |    |                                                                                                                        |    |    |    |    |    |    |    |    |    |    |    |    |    |    |
| 19 |              |                                                                               |      |                                                         |    |    |    |                                                                                                                        |    |    |    |    |    |    |    |    |    |    |    |    |    |    |
| 20 |              |                                                                               |      |                                                         |    |    |    |                                                                                                                        |    |    |    |    |    |    |    |    |    |    |    |    |    |    |
| 21 |              |                                                                               |      |                                                         |    |    |    |                                                                                                                        |    |    |    |    |    |    |    |    |    |    |    |    |    |    |
| 22 |              |                                                                               |      |                                                         |    |    |    |                                                                                                                        |    |    |    |    |    |    |    |    |    |    |    |    |    |    |
| 23 |              |                                                                               |      |                                                         |    |    |    |                                                                                                                        |    |    |    |    |    |    |    |    |    |    |    |    |    |    |
| 24 |              |                                                                               |      |                                                         |    |    |    |                                                                                                                        |    |    |    |    |    |    |    |    |    |    |    |    |    |    |
| 25 |              |                                                                               |      |                                                         |    |    |    |                                                                                                                        |    |    |    |    |    |    |    |    |    |    |    |    |    |    |
| 26 |              |                                                                               |      |                                                         |    |    |    |                                                                                                                        |    |    |    |    |    |    |    |    |    |    |    |    |    |    |
| 27 |              |                                                                               |      |                                                         |    |    |    |                                                                                                                        |    |    |    |    |    |    |    |    |    |    |    |    |    |    |
| 28 |              |                                                                               |      |                                                         |    |    |    |                                                                                                                        |    |    |    |    |    |    |    |    |    |    |    |    |    |    |
| 29 |              |                                                                               |      |                                                         |    |    |    |                                                                                                                        |    |    |    |    |    |    |    |    |    |    |    |    |    |    |
| 30 |              |                                                                               |      |                                                         |    |    |    |                                                                                                                        |    |    |    |    |    |    |    |    |    |    |    |    |    |    |
| 31 |              |                                                                               |      |                                                         |    |    |    |                                                                                                                        |    |    |    |    |    |    |    |    |    |    |    |    |    |    |
| 32 |              |                                                                               |      |                                                         |    |    |    |                                                                                                                        |    |    |    |    |    |    |    |    |    |    |    |    |    |    |
| 33 |              |                                                                               |      |                                                         |    |    |    |                                                                                                                        |    |    |    |    |    |    |    |    |    |    |    |    |    |    |
| 34 |              |                                                                               |      |                                                         |    |    |    |                                                                                                                        |    |    |    |    |    |    |    |    |    |    |    |    |    |    |
| 35 |              |                                                                               |      |                                                         |    |    |    |                                                                                                                        |    |    |    |    |    |    |    |    |    |    |    |    |    |    |
| 36 |              |                                                                               |      |                                                         |    |    |    |                                                                                                                        |    |    |    |    |    |    |    |    |    |    |    |    |    |    |
| 37 |              |                                                                               |      |                                                         |    |    |    |                                                                                                                        |    |    |    |    |    |    |    |    |    |    |    |    |    |    |
| 38 |              |                                                                               |      |                                                         |    |    |    |                                                                                                                        |    |    |    |    |    |    |    |    |    |    |    |    |    |    |
| 39 |              |                                                                               |      |                                                         |    |    |    |                                                                                                                        |    |    |    |    |    |    |    |    |    |    |    |    |    |    |
| 40 |              |                                                                               |      |                                                         |    |    |    |                                                                                                                        |    |    |    |    |    |    |    |    |    |    |    |    |    |    |
| 41 |              |                                                                               |      |                                                         |    |    |    |                                                                                                                        |    |    |    |    |    |    |    |    |    |    |    |    |    |    |
| 42 |              |                                                                               |      |                                                         |    |    |    |                                                                                                                        |    |    |    |    |    |    |    |    |    |    |    |    |    |    |
| 43 |              |                                                                               |      |                                                         |    |    |    |                                                                                                                        |    |    |    |    |    |    |    |    |    |    |    |    |    |    |
| 44 |              |                                                                               |      |                                                         |    |    |    |                                                                                                                        |    |    |    |    |    |    |    |    |    |    |    |    |    |    |
| 45 |              |                                                                               |      |                                                         |    |    |    |                                                                                                                        |    |    |    |    |    |    |    |    |    |    |    |    |    |    |
| 46 |              |                                                                               |      |                                                         |    |    |    |                                                                                                                        |    |    |    |    |    |    |    |    |    |    |    |    |    |    |
| 47 |              |                                                                               |      |                                                         |    |    |    |                                                                                                                        |    |    |    |    |    |    |    |    |    |    |    |    |    |    |
| 48 |              |                                                                               |      |                                                         |    |    |    |                                                                                                                        |    |    |    |    |    |    |    |    |    |    |    |    |    |    |
| 49 |              |                                                                               |      |                                                         |    |    |    |                                                                                                                        |    |    |    |    |    |    |    |    |    |    |    |    |    |    |

For peer review only

1  
2  
3  
4  
5  
6  
7  
8  
9  
10  
11  
12  
13  
14  
15  
16  
17  
18  
19  
20  
21  
22  
23  
24  
25  
26  
27  
28  
29  
30  
31  
32  
33  
34  
35  
36  
37  
38  
39  
40  
41  
42  
43  
44  
45  
46  
47  
48  
49

|                                                                                                                                                                                                                                                                                                                        |                                                                                                                                                                                                     |      |                  |                                                 |                                                                                                                                                            |                                                                                                                     |                                                                                                                                                                                                                                                                                                                                                                        |                                                                                                                                           |    |                                                                                                                                           |                                                                                   |                                                                                                                                                                                                                                                                                                                                                                                                                                                                                                                                                                                                                                                                                                               |    |                                                                                                                                                                                                                                                                                                                                                                                                                                                                                                                                                                                                                                               |    |    |                                                                                                                                                                                                                                                                                                                                   |                                                                                                                                                                                                                                                                                                           |    |                                                                                                                                                                                                                      |
|------------------------------------------------------------------------------------------------------------------------------------------------------------------------------------------------------------------------------------------------------------------------------------------------------------------------|-----------------------------------------------------------------------------------------------------------------------------------------------------------------------------------------------------|------|------------------|-------------------------------------------------|------------------------------------------------------------------------------------------------------------------------------------------------------------|---------------------------------------------------------------------------------------------------------------------|------------------------------------------------------------------------------------------------------------------------------------------------------------------------------------------------------------------------------------------------------------------------------------------------------------------------------------------------------------------------|-------------------------------------------------------------------------------------------------------------------------------------------|----|-------------------------------------------------------------------------------------------------------------------------------------------|-----------------------------------------------------------------------------------|---------------------------------------------------------------------------------------------------------------------------------------------------------------------------------------------------------------------------------------------------------------------------------------------------------------------------------------------------------------------------------------------------------------------------------------------------------------------------------------------------------------------------------------------------------------------------------------------------------------------------------------------------------------------------------------------------------------|----|-----------------------------------------------------------------------------------------------------------------------------------------------------------------------------------------------------------------------------------------------------------------------------------------------------------------------------------------------------------------------------------------------------------------------------------------------------------------------------------------------------------------------------------------------------------------------------------------------------------------------------------------------|----|----|-----------------------------------------------------------------------------------------------------------------------------------------------------------------------------------------------------------------------------------------------------------------------------------------------------------------------------------|-----------------------------------------------------------------------------------------------------------------------------------------------------------------------------------------------------------------------------------------------------------------------------------------------------------|----|----------------------------------------------------------------------------------------------------------------------------------------------------------------------------------------------------------------------|
| Moat N.E.<br>Ludman P.<br>De Belder M.A.<br>Bridgewater B.<br>Cunningham A.D.<br>Young C.P.<br>Thomas M.<br>Kovac J.<br>Spyt T.<br>MacCarthy P.A.<br>Wendler O.<br>Hildick-Smith D.<br>Davies S.W.<br>Trivedi U.<br>Blackman D.J.<br>Levy R.D.<br>Brecker S.J.D.<br>Baumbach A.<br>Daniel T.<br>Gray H.<br>Mullen M.J. | Long-term outcomes after transcatheter aortic valve implantation in high-risk patients with severe aortic stenosis: The U.K. TAVI (United Kingdom transcatheter aortic valve implantation) registry | 2011 | UK TAVI Registry | Transcatheter Aortic Valve implantation surgery | Society for Cardiothoracic Surgery in Great Britain and Ireland and the British Cardiovascular Intervention Society, Central cardiac audit database (CCAD) | Society for Cardiothoracic Surgery in Great Britain and Ireland and the British Cardiovascular Intervention Society | Aim of registry: To coordinate and monitor the practice and dissemination of TAVI. The purpose of this project was to define the characteristics and clinical outcomes of the patient population treated with TAVI (regardless of technology or access route) in every (i.e., nonselected) center undertaking TAVI                                                     | By society for Cardiothoracic Surgery in Great Britain and Ireland and the British Cardiovascular Intervention Society, Web-based system. | NS | Society for Cardiothoracic Surgery in Great Britain and Ireland and the British Cardiovascular Intervention Society agreed on the dataset | Demographics, risk factors, and outcomes, complications (morbidity and mortality) | Mortality tracking was undertaken by the National Health Service Central Register by using unique patient identifiers. It is a legal requirement for all deaths in the United Kingdom to be registered with this body. It is not possible to effect any form of burial/cremation or similar process for the deceased without such registration. Thus, tracking yields very robust results. Survival status for the whole cohort of patients was determined through the NHS Central Register. All fields were examined for missing data or extreme values, and contributing units were asked to complete or correct data where possible. Extreme data were verified and excluded only if found to be erroneous | NS | Data from 877 implants in 870 patients were submitted to the CCAD. Completeness of valid data was 99.6% for demographic data, 96.4% for risk factors, 97.4% for procedural variables, and 98.5% for in-hospital outcomes. Eighteen of the 25 units had valid data completeness of >95%. Mortality tracking was achieved in 100% of patients. The U.K. TAVI Registry is unique in that it has captured every TAVI performed at all the 25 active units within England and Wales, and thus includes the entire "learning curve" and early experience of adopting centers without any publication bias that might be induced by center selection | NS | NS | Whereas data on the numbers of procedures and survival outcome are believed to be extremely robust, those concerning morbidity and complications are likely less so. Although internal consistency checks have been applied, these data are self-reported and have not been systematically validated or independently adjudicated | The registry encompasses a substantial number of implants with both commercially available technologies utilizing all of the described access routes, and has robust (100%) overall mortality tracking. It is also the first report of outcomes beyond 1 year for a substantial number of patients (>850) | NS | All processes performed in compliance with current U.K. Data Protection and Information Governance legislation. All patients provided signed, informed consent. Data is encrypted before transfer to central servers |
| Moller H.<br>Richards S.<br>Hanchett N.<br>Riaz S.P.<br>Luchtenborg M.<br>Holmberg L.<br>Robinson D.                                                                                                                                                                                                                   | Completeness of case ascertainment and survival time error in English cancer registries: Impact on 1-year survival estimates                                                                        | 2011 | Research paper   | Colorectal, lung, and breast cancer patients    | NS                                                                                                                                                         | NS                                                                                                                  | This study linked routine cancer registration records for colorectal, lung, and breast cancer patients with information from the Hospital Episode Statistics (HES) database for the period 2001–2007. Based on record linkage with the HES database, records missing in the cancer register were identified and the completeness of the cancer registers were assessed | NS                                                                                                                                        | NS | NS                                                                                                                                        | NS                                                                                | NS                                                                                                                                                                                                                                                                                                                                                                                                                                                                                                                                                                                                                                                                                                            | NS | Completeness of case ascertainment in English cancer registries is high, possibly as much as 96–99%, when evaluated against independently recorded hospital episodes which included relevant cancer diagnosis and surgery codes. There was 1–4% incompleteness in the Thames Cancer Registry. Most registries had higher completeness than Thames                                                                                                                                                                                                                                                                                             | NS | NS | NS                                                                                                                                                                                                                                                                                                                                | NS                                                                                                                                                                                                                                                                                                        | NS | NS                                                                                                                                                                                                                   |

For peer review only

1  
2  
3  
4  
5  
6  
7  
8  
9  
10  
11  
12  
13  
14  
15  
16  
17  
18  
19  
20  
21  
22  
23  
24  
25  
26  
27  
28  
29  
30  
31  
32  
33  
34  
35  
36  
37  
38  
39  
40  
41  
42  
43  
44  
45  
46  
47  
48  
49

Van Gijn and  
van De  
Velde  
Quality assurance  
through outcome  
registration in  
colorectal cancer  
- An EOCO  
initiative for  
Europe  
201  
1  
Commentary  
Colorectal cancer  
NS  
NS  
This article  
describes a  
strong audit  
framework for  
surgical oncology  
in Europe  
NS  
NS

Hospitals and surgeons can improve their results by learning from their own outcome statistics and those of their colleagues. Identifying, communicating and adopting 'best practices' may improve the quality of care nationwide. The most important advantage of these audit registries compared with clinical trials is the fact that they include the entire patient population without excluding certain patient groups. Benefits of these registries can be seen across Europe. For example in 2001, The Association of Coloproctology of Great Britain and Ireland (ACPGBI) started the National Bowel Cancer Audit Programme (NBOCAP). In 2008, 95% of trusts in England and Wales submitted data. Within 5 years, 30 day mortality dropped from 7% to 4.5%. National audit registries in surgical oncology have led to improvements with a greater impact on survival than any of the adjuvant therapies currently under study. Moreover, they offer the possibility to perform research on patient groups that are usually excluded from clinical trials such as the elderly

Data has to be prospective, complete, case-mix adjusted and preferably collected by independent investigators  
NS

For peer review only

1  
2  
3  
4  
5  
6  
7  
8  
9  
10  
11  
12  
13  
14  
15  
16  
17  
18  
19  
20  
21  
22  
23  
24  
25  
26  
27  
28  
29  
30  
31  
32  
33  
34  
35  
36  
37  
38  
39  
40  
41  
42  
43  
44  
45  
46  
47  
48  
49

|                                                                                                                               |                                                                                                                   |      |                                                                                   |                       |                                                                                                                                                                          |                                           |                                                                                                                                        |                                                                                                                                                                                                                             |                                                                |                                                                                                                                                                                                                                                                        |                                                                                                                                                                                                                    |                                                                                                                                                                                                                                                                                                                                                                                                                                                                                                                                                                                                                                                                                                                                                                                                                                                                                                                                                                                                                                                                                                           |                                                                                                                                                                                                                                                                                                                                                                                                                                                                                                                                                                                                                                                |                                                                                                                                                                                                                                                                                                                                                                                                                                                                                                                                                                                                                                                                                                                                                                                                                                                                                                                                                                                 |                                                                                                                                                                                                                                                                                                                                                                                                                                                                                                                                                                                                                                                                                                                                                                                                                                            |                                                                                                                                                                                                                                                                                                                                                              |                                                                                                                                                                                                                                                                                                                                                                                                                                                                                    |                                                                                                                    |    |                                                                                                                                                                                                                                                                                                                                                                                             |
|-------------------------------------------------------------------------------------------------------------------------------|-------------------------------------------------------------------------------------------------------------------|------|-----------------------------------------------------------------------------------|-----------------------|--------------------------------------------------------------------------------------------------------------------------------------------------------------------------|-------------------------------------------|----------------------------------------------------------------------------------------------------------------------------------------|-----------------------------------------------------------------------------------------------------------------------------------------------------------------------------------------------------------------------------|----------------------------------------------------------------|------------------------------------------------------------------------------------------------------------------------------------------------------------------------------------------------------------------------------------------------------------------------|--------------------------------------------------------------------------------------------------------------------------------------------------------------------------------------------------------------------|-----------------------------------------------------------------------------------------------------------------------------------------------------------------------------------------------------------------------------------------------------------------------------------------------------------------------------------------------------------------------------------------------------------------------------------------------------------------------------------------------------------------------------------------------------------------------------------------------------------------------------------------------------------------------------------------------------------------------------------------------------------------------------------------------------------------------------------------------------------------------------------------------------------------------------------------------------------------------------------------------------------------------------------------------------------------------------------------------------------|------------------------------------------------------------------------------------------------------------------------------------------------------------------------------------------------------------------------------------------------------------------------------------------------------------------------------------------------------------------------------------------------------------------------------------------------------------------------------------------------------------------------------------------------------------------------------------------------------------------------------------------------|---------------------------------------------------------------------------------------------------------------------------------------------------------------------------------------------------------------------------------------------------------------------------------------------------------------------------------------------------------------------------------------------------------------------------------------------------------------------------------------------------------------------------------------------------------------------------------------------------------------------------------------------------------------------------------------------------------------------------------------------------------------------------------------------------------------------------------------------------------------------------------------------------------------------------------------------------------------------------------|--------------------------------------------------------------------------------------------------------------------------------------------------------------------------------------------------------------------------------------------------------------------------------------------------------------------------------------------------------------------------------------------------------------------------------------------------------------------------------------------------------------------------------------------------------------------------------------------------------------------------------------------------------------------------------------------------------------------------------------------------------------------------------------------------------------------------------------------|--------------------------------------------------------------------------------------------------------------------------------------------------------------------------------------------------------------------------------------------------------------------------------------------------------------------------------------------------------------|------------------------------------------------------------------------------------------------------------------------------------------------------------------------------------------------------------------------------------------------------------------------------------------------------------------------------------------------------------------------------------------------------------------------------------------------------------------------------------|--------------------------------------------------------------------------------------------------------------------|----|---------------------------------------------------------------------------------------------------------------------------------------------------------------------------------------------------------------------------------------------------------------------------------------------------------------------------------------------------------------------------------------------|
| Berven S.H.<br>Yaszemski M.J.<br>Newton P.O.<br>Christianson W.<br>Abemman H.M.<br>Moreau J.-C.<br>Mulcahey M.J.<br>Betz R.R. | Introduction of new devices and technologies into a spine surgery practice: A review of processes and regulations | 2010 | Review article that discusses how to bring new technologies and devices to market | Spinal Surgery        | A long-term registry need partnership between surgeons, professional societies, and industry to assess the safety and efficacy of new devices and technologies over time | NS                                        | To assist surgeons in building a knowledge base to evaluate whether the new options are appropriate for their patients                 | A long-term registry recording outcomes measures needs to be developed in a partnership between surgeons, professional societies, and industry to assess the safety and efficacy of new devices and technologies over time. | NS                                                             | NS                                                                                                                                                                                                                                                                     | Registries should be designed to document validated outcome measures, including QOL, length of stay                                                                                                                | NS                                                                                                                                                                                                                                                                                                                                                                                                                                                                                                                                                                                                                                                                                                                                                                                                                                                                                                                                                                                                                                                                                                        | NS                                                                                                                                                                                                                                                                                                                                                                                                                                                                                                                                                                                                                                             | British Sociolais Society was asked about compliance of data entry by surgeons within their society, and it is considered to be extremely poor. In the United Kingdom, the hp surgery registry works well                                                                                                                                                                                                                                                                                                                                                                                                                                                                                                                                                                                                                                                                                                                                                                       | NS                                                                                                                                                                                                                                                                                                                                                                                                                                                                                                                                                                                                                                                                                                                                                                                                                                         | NS                                                                                                                                                                                                                                                                                                                                                           | NS                                                                                                                                                                                                                                                                                                                                                                                                                                                                                 | NS                                                                                                                 | NS | NS                                                                                                                                                                                                                                                                                                                                                                                          |
| Bridgewater B.                                                                                                                | Cardiac registers: The adult cardiac surgery register                                                             | 2010 | The Adult Cardiac Surgery Register                                                | Adult cardiac surgery | Clinicians, Society for Cardiothoracic Surgery (SCTS), Central Cardiac Audit Database (CCAD)                                                                             | Society for Cardiothoracic Surgery (SCTS) | To measure the quality of care of adult cardiac surgery in GB and Ireland and provide information for quality improvement and research | Software systems set up by the Central Cardiac Audit Database (CCAD, now part of the NHS Information Centre                                                                                                                 | HQUIP funded the paper - not specified who funded the registry | The dataset was selected by the SCTS and the current definitions were agreed in 2003 with an understanding that these would remain unchanged for 5 years to allow data collection to become embedded and to prevent frequent and potentially costly software upgrades. | Preoperative patient characteristics, operative details and postoperative information, including postoperative complications, length of stay and mortality. The dataset allows adjustments to be made for case mix | There is a voluntary validation system - Site visits occur to look at an institution's processes. These include validating documented systems and responsibilities for collecting the audit data, appropriate and timely feedback of data to clinicians for 'real time' feedback, a process to cross reference surgical activity in the SCTS database against theatre logs and the administrative database and a mechanism to cross check mortality on the database against other sources of mortality within the hospital. The data collected by units is uploaded to CCAD after encryption of all patient identifiers. On upload a report is produced about the number of records and potential major and minor flaws in the data to allow correction to be made. They are able to measure long term mortality because all patient records in the database have an 'encrypted' NHS number that allows linkage with the office of National Statistic to allow life status at any time to be established. Important to have a data validation processes, possibly with online screening of submitted data | The data enables individual practitioner recertification. The White paper 'Trust, assurance and safety is changing the way the medical profession is regulated, and demonstrating satisfactory 'success rates of treatments' is becoming essential. This thought process increases the importance of, and clinical buy-in to, national registries. There was initial reluctance from some within the specialty to conduct data collection, collation, analysis and publication, but a combination of leadership within the profession and external scrutiny has driven the initiative so that robust and complete information is now available | The data in the database is thought to be of good quality but this is not subject to rigorous external validation. It is believed that case ascertainment is complete, postoperative complications rate and length of stay. The highest profile outputs from the database have been the national reports, known within UK cardiac surgery as the 'blue books'. These are comprehensive reports which exhaustively document trends in cardiac surgery outcomes and practice and benchmark cardiac surgical mortality rates, including longer-term outcomes. Another high-profile output from the database is the publication of named hospital and surgeon mortality data to the public through the Care Quality Commission website. This presents detailed information about cardiac surgical diseases and their treatments, and presents results in a clear way for patients and their carers. This website receives in excess of 26 000 hits each month. SCTS is developing a | The CCAD software allows views of the data including activity, the incidence of various risk factors, in-hospital mortality, risk-adjusted mortality, postoperative complications rate and length of stay. The NHS completeness rates of the submitted data are generally good—the incidence of missing data for age is 1.4% and for gender 0.07% between 2004 and 2008. Most important fields for risk stratification have an incidence of missing data of <5%. The missing data for postoperative complication rates is somewhat higher at around 15%. This is coming down over time. The recent database report included over 400 000 operations with information on over 114 000 coronary artery bypass operations, 30 000 aortic valve operations and 10 000 mitral valve operations, which allowed important findings to be reported | Outcomes of care by a consultant team should be available to the public as per Professor Sir Ian Kennedy's report, following events in paediatric cardiac surgery at Bristol Royal Infirmary and the subsequent public inquiry. Mortality data for this registry are available to the public. Data has been used for patient information and patient choice. | Time pressures act as a disincentive. Registry may produce risk averse behaviour due to publishing surgeon specific outcomes. The registry was not subjected to rigorous external validation and there is a important incidence of missing data in some critical fields within the dataset. The SCTS has also not been able to frequently modify the dataset to account for changes in contemporary practice, which prevents accurate tracking of activity and emerging treatments | The registry has been linked with marked improvements in outcomes, without many of the feared adverse consequences | NS | The reports also have political significance—for example, the 5th report contextualised the UK cardiac surgical data collection initiative against the recommendations of the public inquiry into the events at Bristol Royal Infirmary. The recent 6th report was used to help inform thoughts on the professional recertification agenda. The registry uses encrypted patient identifiers |

to look for  
hospitals of  
potential  
concern, followed  
up by targeted  
site visits to  
assess accuracy  
of data entry.

strategy to  
increase the  
research  
outputs from the  
database and  
has activated a  
data-sharing  
agreement for  
that purpose.  
There has been  
much debate  
over publishing  
named surgeon  
data, but what  
is without  
question is that  
there have been  
marked  
improvements  
in risk-adjusted  
mortality for  
cardiac surgery  
in the UK over  
the past 10  
years. There is  
no evidence  
that the initiative  
to collect,  
benchmark and  
publish these  
data has been  
associated with  
significant 'risk-  
adverse'  
behaviour  
among  
surgeons in the  
UK. This should  
be reassuring to  
all stakeholders

For peer review only

1  
2  
3  
4  
5  
6  
7  
8  
9  
10  
11  
12  
13  
14  
15  
16  
17  
18  
19  
20  
21  
22  
23  
24  
25  
26  
27  
28  
29  
30  
31  
32  
33  
34  
35  
36  
37  
38  
39  
40  
41  
42  
43  
44  
45  
46  
47  
48  
49



1  
2  
3  
4  
5  
6  
7  
8  
9  
10  
11  
12  
13  
14  
15  
16  
17  
18  
19  
20  
21  
22  
23  
24  
25  
26  
27  
28  
29  
30  
31  
32  
33  
34  
35  
36  
37  
38  
39  
40  
41  
42  
43  
44  
45  
46  
47  
48  
49

|                                                                   |                                                                                                                  |      |                                                         |               |                                                                                                  |                      |                                                                                     |                         |                                      |                                                                                                                                                                                                                                                                                      |                                                                                                                                                                                                                                                                                                                                                                                                                                                                                                                                                                                                                                                                                                                                                                                                                                                                                                                                                                                                                                                                                                                                                                                           |                                                                                                                                                                                                                                                                                                                                                                                                                                                                                                                                                                                                                                                                                                                                                                                                                                                                                                                                                                                                                                                                                                |                                                                                                                                                                                                                                                                                                                                            |                                                                                                                                                                                                                                                                                                                                                                                                                                                                                                                                                                                                                                                                                                                                                                                                                                                                                                                                                                                                                                                                                                                                                                                                                                                                                                     |    |    |                                                                                                                                                                                                                                                                                                                                                                                                                                                                                                                                                                                                                                                                |                                                                                                                                                                    |    |                                                                                                                                                                                                                                                                                                                                                                                                                                                                                                                                                                                                                                                                                                                                          |
|-------------------------------------------------------------------|------------------------------------------------------------------------------------------------------------------|------|---------------------------------------------------------|---------------|--------------------------------------------------------------------------------------------------|----------------------|-------------------------------------------------------------------------------------|-------------------------|--------------------------------------|--------------------------------------------------------------------------------------------------------------------------------------------------------------------------------------------------------------------------------------------------------------------------------------|-------------------------------------------------------------------------------------------------------------------------------------------------------------------------------------------------------------------------------------------------------------------------------------------------------------------------------------------------------------------------------------------------------------------------------------------------------------------------------------------------------------------------------------------------------------------------------------------------------------------------------------------------------------------------------------------------------------------------------------------------------------------------------------------------------------------------------------------------------------------------------------------------------------------------------------------------------------------------------------------------------------------------------------------------------------------------------------------------------------------------------------------------------------------------------------------|------------------------------------------------------------------------------------------------------------------------------------------------------------------------------------------------------------------------------------------------------------------------------------------------------------------------------------------------------------------------------------------------------------------------------------------------------------------------------------------------------------------------------------------------------------------------------------------------------------------------------------------------------------------------------------------------------------------------------------------------------------------------------------------------------------------------------------------------------------------------------------------------------------------------------------------------------------------------------------------------------------------------------------------------------------------------------------------------|--------------------------------------------------------------------------------------------------------------------------------------------------------------------------------------------------------------------------------------------------------------------------------------------------------------------------------------------|-----------------------------------------------------------------------------------------------------------------------------------------------------------------------------------------------------------------------------------------------------------------------------------------------------------------------------------------------------------------------------------------------------------------------------------------------------------------------------------------------------------------------------------------------------------------------------------------------------------------------------------------------------------------------------------------------------------------------------------------------------------------------------------------------------------------------------------------------------------------------------------------------------------------------------------------------------------------------------------------------------------------------------------------------------------------------------------------------------------------------------------------------------------------------------------------------------------------------------------------------------------------------------------------------------|----|----|----------------------------------------------------------------------------------------------------------------------------------------------------------------------------------------------------------------------------------------------------------------------------------------------------------------------------------------------------------------------------------------------------------------------------------------------------------------------------------------------------------------------------------------------------------------------------------------------------------------------------------------------------------------|--------------------------------------------------------------------------------------------------------------------------------------------------------------------|----|------------------------------------------------------------------------------------------------------------------------------------------------------------------------------------------------------------------------------------------------------------------------------------------------------------------------------------------------------------------------------------------------------------------------------------------------------------------------------------------------------------------------------------------------------------------------------------------------------------------------------------------------------------------------------------------------------------------------------------------|
| Bates T.<br>Kearins O.<br>Monyenny I.<br>Lagord C.<br>Lawrence G. | Clinical outcome data for symptomatic breast cancer: The breast cancer clinical outcome measures (BCCOM) project | 2009 | Breast Cancer Clinical Outcome Measures (BCCOM) Project | Breast cancer | Association of Breast Surgeons, the UKACR (UK Association of Cancer Registries), Breast surgeons | BCCOM Steering Group | To capture newly monitor current practice of treatment of symptomatic breast cancer | By BCCOM Steering Group | Breakthrough Breast Cancer (charity) | Uses a subset of the national breast cancer data set. A breast cancer data set was designed after consultation with the ABS (Association of Breast Surgery) and the UKACR (UK Association of Cancer Registries), QOL and PROMS data should become part of the dataset in the future. | Demographics, diagnostic information, tumour characteristics, surrogate outcome measures: 1) Number and proportion of breast cancers for which complete information is received 2) Number of symptomatic and screen-detected breast cancers treated in a hospital per annum 3) Number and proportion of breast cancers for which there is a pre-operative diagnosis 4) Number and proportion of breast cancers given medical treatment only 5) Number and proportion of breast cancers treated surgically 6) Mastectomy rate by breast size: <15, >15 and <20, >20 and <35, >35 and <50, >50 mm invasive diameter 7) Number and proportion of invasive breast cancers for which nodal status is known 8) Number and proportion of histologically node-negative invasive breast cancers for which more than seven nodes were harvested 9) Number and proportion of invasive breast cancers treated by breast-conserving surgery and receiving radiotherapy 10) Number and proportion of node-positive patients with invasive breast cancers, aged <60 years, receiving chemotherapy, number and proportion of patients with ER-positive invasive breast cancers, receiving hormone therapy | Data on all newly-diagnosed primary symptomatic breast cancers are obtained from the UK cancer registries. To validate the accuracy of data collection, cancer registries send the collected data to the concerned consultant breast surgeon. The surgeons in turn are asked to check the validity of data by comparing them with those held on local systems, to make amendments if necessary and to return the data without patient-identifiable details to the BCCOM (Breast Cancer Clinical Outcome Measures) Project team at the West Midlands Cancer Intelligence Unit (WMCIU). Surgeons may submit unchecked data if they do not have the necessary support mechanisms or if they are convinced that the quality of the data is high. Cases are not included if the surgeon attends less than six symptomatic cases in the year, chooses not to participate or is unknown. Cancer registry data are now matched to data held in national data sets, such as Hospital Episode Statistics (HES) - this is useful in collecting data missed by the registry and for cross checking of data | Participation by breast surgeons in the BCCOM Project is not mandatory, but it is strongly encouraged by their professional body, the ABS (Association of Breast Surgeons). The regional symptomatic representatives of ABS are encouraged to review participation in their own areas and to identify ways in which this could be improved | In year 3, 221488 eligible surgeons submitted data; 167923/213 cases were submitted. In year 2 (cases diagnosed in 2004), there was a 14% reduction in the total number of cases submitted (14120 compared with 16407) and very large reductions in some regions. These decreases are in part because of the more reliable exclusion of ineligible screen-detected cases in year 2, but mainly result from changes in the protocols for data collection in year 2, which required written consent from all surgeons before releasing the data of patients under their care to the lead surgeon in each hospital for validation. In year 3 (cases diagnosed in 2004), the UK cancer registries supplied the BCCOM team with data on all 48983 diagnosed breast cancers. This provided a denominator of the total number of eligible cases with which participation could be compared and an estimate of the annual breast cancer burden in the United Kingdom could be made. Wales had the highest recruitment of cases at 94%, and the Thames Region, which has the highest number of surgeons and the most number of cases, had by far the lowest recruitment at 29%. In addition to the 1219 cases (3%), which were excluded in year 3 because the surgeon had treated fewer than six symptomatic | NS | NS | Initially (before the BCCOM project started) the capturing of data on symptomatic breast surgery was not funded; and whilst initially they captured 1/3rd of the population caseload, many collaborators failed to continue owing to lack of funding. Although progress in data collection has been improved by central notification of surgeons in most regions, the data underline the continuing difficulty in depending on the voluntary and active participation of individual surgeons in the submission and validation of data. Surgeons must give written permission for release of patient details - but this has not been good for data completeness | Regular audit of surgical practice improves standards and highlights outliers. This BCCOM audit enabled identification of regional variations in surgical practice | NS | From year 2 onwards, the initial protocol for data collection was modified to ensure compliance with Section 60 of the Health and Social Care Act 2001; it was observed that, although non-identifiable data were stored in the BCCOM central database, the flow of information at the beginning of the audit cycle, from cancer registry to surgeon for validation, was at an individual patient level. Therefore, the updated protocol requested that cancer registries obtain the written consent of individual consultant surgeons before releasing the data to the lead breast surgeon in each hospital. Surgeons must give written permission to for release of patient details - but this has not been good for data completeness |
|-------------------------------------------------------------------|------------------------------------------------------------------------------------------------------------------|------|---------------------------------------------------------|---------------|--------------------------------------------------------------------------------------------------|----------------------|-------------------------------------------------------------------------------------|-------------------------|--------------------------------------|--------------------------------------------------------------------------------------------------------------------------------------------------------------------------------------------------------------------------------------------------------------------------------------|-------------------------------------------------------------------------------------------------------------------------------------------------------------------------------------------------------------------------------------------------------------------------------------------------------------------------------------------------------------------------------------------------------------------------------------------------------------------------------------------------------------------------------------------------------------------------------------------------------------------------------------------------------------------------------------------------------------------------------------------------------------------------------------------------------------------------------------------------------------------------------------------------------------------------------------------------------------------------------------------------------------------------------------------------------------------------------------------------------------------------------------------------------------------------------------------|------------------------------------------------------------------------------------------------------------------------------------------------------------------------------------------------------------------------------------------------------------------------------------------------------------------------------------------------------------------------------------------------------------------------------------------------------------------------------------------------------------------------------------------------------------------------------------------------------------------------------------------------------------------------------------------------------------------------------------------------------------------------------------------------------------------------------------------------------------------------------------------------------------------------------------------------------------------------------------------------------------------------------------------------------------------------------------------------|--------------------------------------------------------------------------------------------------------------------------------------------------------------------------------------------------------------------------------------------------------------------------------------------------------------------------------------------|-----------------------------------------------------------------------------------------------------------------------------------------------------------------------------------------------------------------------------------------------------------------------------------------------------------------------------------------------------------------------------------------------------------------------------------------------------------------------------------------------------------------------------------------------------------------------------------------------------------------------------------------------------------------------------------------------------------------------------------------------------------------------------------------------------------------------------------------------------------------------------------------------------------------------------------------------------------------------------------------------------------------------------------------------------------------------------------------------------------------------------------------------------------------------------------------------------------------------------------------------------------------------------------------------------|----|----|----------------------------------------------------------------------------------------------------------------------------------------------------------------------------------------------------------------------------------------------------------------------------------------------------------------------------------------------------------------------------------------------------------------------------------------------------------------------------------------------------------------------------------------------------------------------------------------------------------------------------------------------------------------|--------------------------------------------------------------------------------------------------------------------------------------------------------------------|----|------------------------------------------------------------------------------------------------------------------------------------------------------------------------------------------------------------------------------------------------------------------------------------------------------------------------------------------------------------------------------------------------------------------------------------------------------------------------------------------------------------------------------------------------------------------------------------------------------------------------------------------------------------------------------------------------------------------------------------------|



of 9 am-5:30 pm  
Monday-Friday for  
the duration of the  
audit

1  
2  
3  
4  
5  
6  
7  
8  
9  
10  
11  
12  
13  
14  
15  
16  
17  
18  
19  
20  
21  
22  
23  
24  
25  
26  
27  
28  
29  
30  
31  
32  
33  
34  
35  
36  
37  
38  
39  
40  
41  
42  
43  
44  
45  
46  
47  
48  
49

|             |                                                    |      |                                                                                                                                                                                 |                            |    |    |                                                                                                                                                                                                                                                                                                                                                                                                                                  |    |                                  |    |    |                                                                                                                                                                                                                                                                                                                                                                                                                                                                                                                                                                                                                                                                                                                                                                                                                                                                                                                                                                                                                                                                                                                                                                                                                                                                          |    |                                                                                                                                    |    |                                                                                                                                                                                                                          |    |                                                                                 |    |                                                                        |
|-------------|----------------------------------------------------|------|---------------------------------------------------------------------------------------------------------------------------------------------------------------------------------|----------------------------|----|----|----------------------------------------------------------------------------------------------------------------------------------------------------------------------------------------------------------------------------------------------------------------------------------------------------------------------------------------------------------------------------------------------------------------------------------|----|----------------------------------|----|----|--------------------------------------------------------------------------------------------------------------------------------------------------------------------------------------------------------------------------------------------------------------------------------------------------------------------------------------------------------------------------------------------------------------------------------------------------------------------------------------------------------------------------------------------------------------------------------------------------------------------------------------------------------------------------------------------------------------------------------------------------------------------------------------------------------------------------------------------------------------------------------------------------------------------------------------------------------------------------------------------------------------------------------------------------------------------------------------------------------------------------------------------------------------------------------------------------------------------------------------------------------------------------|----|------------------------------------------------------------------------------------------------------------------------------------|----|--------------------------------------------------------------------------------------------------------------------------------------------------------------------------------------------------------------------------|----|---------------------------------------------------------------------------------|----|------------------------------------------------------------------------|
| Clarke D.R. | Verification of data in congenital cardiac surgery | 2008 | This paper reviews 3 registries: The Society of Thoracic Surgeons, The European Association for Cardio-Thoracic Surgery, and The United Kingdom Central Cardiac Audit Database. | Congenital cardiac surgery | NS | NS | This paper reviews the current strategies used for verification of the data in the congenital databases of The Society of Thoracic Surgeons (america), The European Association for Cardio-Thoracic Surgery (europe), and The United Kingdom Central Cardiac Audit Database (UK). The Central Cardiac Audit Database aimed to provide national analyses of outcomes after cardiovascular surgery and therapeutic catheterization | NS | The UK registry is funded by DOH | NS | NS | For UK registry (The Central Cardiac Audit Database): Data are collected electronically in an anonymous encrypted format with prospective tracking of mortality and re-intervention using up to a 40 field minimum dataset. In the UK registry, the verification process begins at the congenital cardiac centre. Most of the 13 cardiac units in the United Kingdom have database managers who check for data accuracy with medical staff before the data is submitted. Independent validation of the patient's status (alive or dead) is achieved by central tracking using the linkage of each patient's National Health Service number to the Office of National Statistics, where the death of every resident in England and Wales is registered. Data verification audit site visits are very effective at drawing attention to the importance of high quality data. The visits can also provide "ammunition" for convincing institutional administration to commit appropriate resources to data management. In the UK registry, each unit is visited for one/two days each year by a specialist database nurse administrator from the Central Cardiac Audit Database and a volunteer surgeon or cardiologist from another unit. A detailed pre-visit proforma is | NS | For the UK registry centre specific results are now published on the World Wide Web allowing free access to families and the media | NS | For the UK registry, ideally, every medical record of the approximately 8,000 patients undergoing procedures each year should be examined. However, there is a lack of funding and skilled manpower for such an activity | NS | Patients included in medical audit have better outcomes than those not included | NS | In the UK registry, patients give informed consent for data submission |
|-------------|----------------------------------------------------|------|---------------------------------------------------------------------------------------------------------------------------------------------------------------------------------|----------------------------|----|----|----------------------------------------------------------------------------------------------------------------------------------------------------------------------------------------------------------------------------------------------------------------------------------------------------------------------------------------------------------------------------------------------------------------------------------|----|----------------------------------|----|----|--------------------------------------------------------------------------------------------------------------------------------------------------------------------------------------------------------------------------------------------------------------------------------------------------------------------------------------------------------------------------------------------------------------------------------------------------------------------------------------------------------------------------------------------------------------------------------------------------------------------------------------------------------------------------------------------------------------------------------------------------------------------------------------------------------------------------------------------------------------------------------------------------------------------------------------------------------------------------------------------------------------------------------------------------------------------------------------------------------------------------------------------------------------------------------------------------------------------------------------------------------------------------|----|------------------------------------------------------------------------------------------------------------------------------------|----|--------------------------------------------------------------------------------------------------------------------------------------------------------------------------------------------------------------------------|----|---------------------------------------------------------------------------------|----|------------------------------------------------------------------------|

completed by each centre covering such areas as security and confidentiality, in-house verification and quality assurance, training for data collection and accuracy, communication issues, accountability, health records management, and timeliness of central submission. The visits are scheduled in the year following data submission. At the visit, all operating room and catheter laboratory logbooks are scrutinized to ensure procedural data accuracy and that all procedures have been captured. Also, a random selection of 20 patient hospital records is requested in advance and compared to the dataset submitted for missing or incorrect data. A Data Quality Indicator score is then calculated. The results have been encouraging with the scores improving over time from an average of 73% to 91% currently (range 81–98%). At the end of the visit, the unit clinicians meet with the auditors to discuss areas of excellence and deficiencies. Within weeks, a formal report is submitted back to the hospital team and to higher management. The visits are therefore seen by the congenital cardiac clinicians as very positive encounters. A combination of site visits to verify the data at the primary source of the data, and external verification of the data from independent databases or registries, such as governmental death registries, may be required to allow for optimal verification of data. It is important to verify the completeness and accuracy of data in congenital cardiac registries - A report from the United Kingdom Central Cardiac Audit

Database reveals that hospital databases under-reported 42 operative deaths out of a total of 194 (21.6%). Similarly, the European Association for Cardio-Thoracic Surgery implemented a data verification process and discovered that 7 hospital deaths out of 68 (10.3%) were not reported.

For peer review only

1  
2  
3  
4  
5  
6  
7  
8  
9  
10  
11  
12  
13  
14  
15  
16  
17  
18  
19  
20  
21  
22  
23  
24  
25  
26  
27  
28  
29  
30  
31  
32  
33  
34  
35  
36  
37  
38  
39  
40  
41  
42  
43  
44  
45  
46  
47  
48  
49

1  
2  
3  
4  
5  
6  
7  
8  
9  
10  
11  
12  
13  
14  
15  
16  
17  
18  
19  
20  
21  
22  
23  
24  
25  
26  
27  
28  
29  
30  
31  
32  
33  
34  
35  
36  
37  
38  
39  
40  
41  
42  
43  
44  
45  
46  
47  
48  
49

|             |                                                                                                                                                     |      |                                     |                            |                                                                                                                                                                                         |                                               |                                                                                                                                                                                                                                                                                                                                                                                                                                                                                                                                                                                                                                                               |                                                                                                                                                                                                                                                   |                                                                            |                                                                                                                                                                                                                                                                                                                                                                                                                                                                                                                                                              |                                                                                                                                                                                                                                                                                                                                   |                                                                                                                                                                                                                                                                                                                                                                                                                                                                                                                                                                                           |                                                                                                                                                                                                                                                                                                                                                          |                                                                                                                                 |                                                                                                                                                                                                                                                                                                                                                                                                                                                                                                                                                                                                                                                                                                                                                                                                                                                                                                                                                                                                                                                                                                                                                                                                                                                                                                                                                                                                                                                                                                                                                                  |    |    |                                                                                                                                                                                                                                                                                                                                                                                                                                                                                                                                                                                                                                                                                                                                                                                                                                                                                                                                                                                                                                                                                                                     |                                                                                                                                                                                                                                                                                                                                                                                                                                                                                                                                                                                                                                                                                                                                                                                                                                                                                                                                                                                                                                         |                                                                                                                                                                                                                                                                 |
|-------------|-----------------------------------------------------------------------------------------------------------------------------------------------------|------|-------------------------------------|----------------------------|-----------------------------------------------------------------------------------------------------------------------------------------------------------------------------------------|-----------------------------------------------|---------------------------------------------------------------------------------------------------------------------------------------------------------------------------------------------------------------------------------------------------------------------------------------------------------------------------------------------------------------------------------------------------------------------------------------------------------------------------------------------------------------------------------------------------------------------------------------------------------------------------------------------------------------|---------------------------------------------------------------------------------------------------------------------------------------------------------------------------------------------------------------------------------------------------|----------------------------------------------------------------------------|--------------------------------------------------------------------------------------------------------------------------------------------------------------------------------------------------------------------------------------------------------------------------------------------------------------------------------------------------------------------------------------------------------------------------------------------------------------------------------------------------------------------------------------------------------------|-----------------------------------------------------------------------------------------------------------------------------------------------------------------------------------------------------------------------------------------------------------------------------------------------------------------------------------|-------------------------------------------------------------------------------------------------------------------------------------------------------------------------------------------------------------------------------------------------------------------------------------------------------------------------------------------------------------------------------------------------------------------------------------------------------------------------------------------------------------------------------------------------------------------------------------------|----------------------------------------------------------------------------------------------------------------------------------------------------------------------------------------------------------------------------------------------------------------------------------------------------------------------------------------------------------|---------------------------------------------------------------------------------------------------------------------------------|------------------------------------------------------------------------------------------------------------------------------------------------------------------------------------------------------------------------------------------------------------------------------------------------------------------------------------------------------------------------------------------------------------------------------------------------------------------------------------------------------------------------------------------------------------------------------------------------------------------------------------------------------------------------------------------------------------------------------------------------------------------------------------------------------------------------------------------------------------------------------------------------------------------------------------------------------------------------------------------------------------------------------------------------------------------------------------------------------------------------------------------------------------------------------------------------------------------------------------------------------------------------------------------------------------------------------------------------------------------------------------------------------------------------------------------------------------------------------------------------------------------------------------------------------------------|----|----|---------------------------------------------------------------------------------------------------------------------------------------------------------------------------------------------------------------------------------------------------------------------------------------------------------------------------------------------------------------------------------------------------------------------------------------------------------------------------------------------------------------------------------------------------------------------------------------------------------------------------------------------------------------------------------------------------------------------------------------------------------------------------------------------------------------------------------------------------------------------------------------------------------------------------------------------------------------------------------------------------------------------------------------------------------------------------------------------------------------------|-----------------------------------------------------------------------------------------------------------------------------------------------------------------------------------------------------------------------------------------------------------------------------------------------------------------------------------------------------------------------------------------------------------------------------------------------------------------------------------------------------------------------------------------------------------------------------------------------------------------------------------------------------------------------------------------------------------------------------------------------------------------------------------------------------------------------------------------------------------------------------------------------------------------------------------------------------------------------------------------------------------------------------------------|-----------------------------------------------------------------------------------------------------------------------------------------------------------------------------------------------------------------------------------------------------------------|
| Jacobs M.L. | Databases for assessing the outcomes of the treatment of patients with congenital and paediatric cardiac disease—the perspective of cardiac surgery | 2008 | Central Cardiac Audit Database (UK) | Congenital cardiac surgery | The Central cardiac audit database was formed in collaboration with the British Cardiac Society, the Society of Cardiothoracic Surgeons, and the British Paediatric Cardiac Association | Respective society of the surgical speciality | This review discusses the rationale for the creation and maintenance of multi-institutional databases for congenital heart surgery, together with a history of the evolution of such databases. This review also describes several European and North American databases for pediatric and congenital cardiac surgery as well as the UK Central Cardiac Audit Database. We have collected data on general learning points and specific information on the UK Central Cardiac Audit Database. The UK Central Cardiac Audit Database monitors surgical and transcatheter cardiovascular interventions undertaken on patients with congenitally malformed hearts | The development of the Central Cardiac Audit Database involved the establishment of a team of experts to set up the computerised registry with robust protocols for the protection and validation of data. Electronic data collection (encrypted) | For the Central Cardiac Audit Database, funding is centrally from the DCRH | There was an International Congenital Heart Surgery Nomenclature and Database Project in September 1998. This led to the publication of a common nomenclature and a common core minimal data set that were enthusiastically accepted by the majority of cardiac databases/societies worldwide. While it is useful to collect data on mortality, fortunately most patients do not die - it is therefore very important to collect data on morbidity, resource utilisation, QOL. A common clinical language (nomenclature) is fundamental for registry success | Demographics, risk factors, co-morbidity, diagnosis, procedure, mortality, complications, length of stay, time to extubation, and utilization of resources. For the Central Cardiac Audit Database, there were initially 20 data fields. After 2 years there was a gradual expansion of the fields - now there are 40 data fields | Independent validation of the status of the patient as alive or dead is achieved by central mortality tracking using the linkage of the National Health Service number of the patient to the Office of National Statistics. For Central Cardiac Audit Database annual visits for the validation of data are undertaken to each hospital submitting data to ensure accuracy of the data and that all procedures undertaken have been captured. These visits also help identify how to improve database management. Whilst site visits are expensive and time consuming, they are essential | For the Central Cardiac Audit Database, there were local "audit facilitators" that encouraged clinicians to enter data and to validate the quality of data before submission. For the Central Cardiac Audit Database, it is compulsory for all centres carrying out interventions on patients with congenital cardiac malformations to submit their data | For Central Cardiac Audit Database, over 26,000 surgical procedures have been amassed at a current rate of over 4,500 each year | Annually, the committee responsible for the database of each Society issues to each participating institution a report consisting of aggregate data and quality improvement participating groups and institutions, de-identified with respect to source, and of data specific to the participant. Each institution receives a report of outcomes encompassing all of their annual activity, as well as cumulative activity over the years of participation. Each participant is therefore able to identify trends in their own practice, including outcomes such as mortality, complications, length of stay, and utilization of resources. For the Central Cardiac Audit Database (UK), underperforming units would receive constructive feedback, which focused, for example, on surgical techniques, intensive care support, or shortcomings in the 'system' or infrastructure. For the Central Cardiac Audit Database, results have been published on the web, with free access to families and the media providing details of outcomes after major surgical procedures and transcatheter procedures. It is important to reduce the time between the actual clinical event (the operation) and the release of the data. Important to realise that outcomes of extremely complex cases are likely to be less favourable than those of cases of lesser complexity. The recognition of this problem led to the development of a system to stratify operative procedures for congenital cardiac diseases in terms of complexity. The system adjusts for baseline | NS | NS | Events such as the Bristol Royal Infirmary have informed us that we need registry databases to facilitate programs of quality assessment and quality improvement. Furthermore, such events including the sometimes misleading reporting of data of uncertain quality, emphasise the importance of clinicians, with their professional societies to take the responsibility of data analysis and reporting. Enables sharing of data and comparing outcomes with colleagues in other institutions and countries. This helps define areas of weakness to improve of quality. A successful registry is one in which the data are complete. There are five fundamental elements that are essential to success in a multi-institutional registry database: 1) a common language or nomenclature, acceptable and familiar to all participants. 2) an established uniform core dataset. 3) a mechanism of evaluating the complexity of the operations. 4) a mechanism to ensure and verify the completeness and accuracy of the data. 5) a platform that enables collaboration between medical and surgical subspecialties. | Registry Databases are distinguished in principle from "Research Databases" in that they are designed to catalogue essential information, in less voluminous detail per patient than is practical in a research database, but with the goal of having this information on all patients. Registry data must be available with good degree of data capture. It should contribute to education, research, the allocation of resources, the analysis of outcomes, and the improvement of quality. A successful registry is one in which the data are complete. There are five fundamental elements that are essential to success in a multi-institutional registry database: 1) a common language or nomenclature, acceptable and familiar to all participants. 2) an established uniform core dataset. 3) a mechanism of evaluating the complexity of the operations. 4) a mechanism to ensure and verify the completeness and accuracy of the data. 5) a platform that enables collaboration between medical and surgical subspecialties. | For the Central Cardiac Audit Database, patients give informed consent for data submission. There are robust protocols for the protection and validation of data. In the UK Central Cardiac Audit Database, data are submitted in an anonymous encrypted format |
|-------------|-----------------------------------------------------------------------------------------------------------------------------------------------------|------|-------------------------------------|----------------------------|-----------------------------------------------------------------------------------------------------------------------------------------------------------------------------------------|-----------------------------------------------|---------------------------------------------------------------------------------------------------------------------------------------------------------------------------------------------------------------------------------------------------------------------------------------------------------------------------------------------------------------------------------------------------------------------------------------------------------------------------------------------------------------------------------------------------------------------------------------------------------------------------------------------------------------|---------------------------------------------------------------------------------------------------------------------------------------------------------------------------------------------------------------------------------------------------|----------------------------------------------------------------------------|--------------------------------------------------------------------------------------------------------------------------------------------------------------------------------------------------------------------------------------------------------------------------------------------------------------------------------------------------------------------------------------------------------------------------------------------------------------------------------------------------------------------------------------------------------------|-----------------------------------------------------------------------------------------------------------------------------------------------------------------------------------------------------------------------------------------------------------------------------------------------------------------------------------|-------------------------------------------------------------------------------------------------------------------------------------------------------------------------------------------------------------------------------------------------------------------------------------------------------------------------------------------------------------------------------------------------------------------------------------------------------------------------------------------------------------------------------------------------------------------------------------------|----------------------------------------------------------------------------------------------------------------------------------------------------------------------------------------------------------------------------------------------------------------------------------------------------------------------------------------------------------|---------------------------------------------------------------------------------------------------------------------------------|------------------------------------------------------------------------------------------------------------------------------------------------------------------------------------------------------------------------------------------------------------------------------------------------------------------------------------------------------------------------------------------------------------------------------------------------------------------------------------------------------------------------------------------------------------------------------------------------------------------------------------------------------------------------------------------------------------------------------------------------------------------------------------------------------------------------------------------------------------------------------------------------------------------------------------------------------------------------------------------------------------------------------------------------------------------------------------------------------------------------------------------------------------------------------------------------------------------------------------------------------------------------------------------------------------------------------------------------------------------------------------------------------------------------------------------------------------------------------------------------------------------------------------------------------------------|----|----|---------------------------------------------------------------------------------------------------------------------------------------------------------------------------------------------------------------------------------------------------------------------------------------------------------------------------------------------------------------------------------------------------------------------------------------------------------------------------------------------------------------------------------------------------------------------------------------------------------------------------------------------------------------------------------------------------------------------------------------------------------------------------------------------------------------------------------------------------------------------------------------------------------------------------------------------------------------------------------------------------------------------------------------------------------------------------------------------------------------------|-----------------------------------------------------------------------------------------------------------------------------------------------------------------------------------------------------------------------------------------------------------------------------------------------------------------------------------------------------------------------------------------------------------------------------------------------------------------------------------------------------------------------------------------------------------------------------------------------------------------------------------------------------------------------------------------------------------------------------------------------------------------------------------------------------------------------------------------------------------------------------------------------------------------------------------------------------------------------------------------------------------------------------------------|-----------------------------------------------------------------------------------------------------------------------------------------------------------------------------------------------------------------------------------------------------------------|

case-mix differences when comparing discharge mortality. The system was created using a combination of judgment-based and empirical methodology with a panel of pediatric cardiologists and cardiac surgeons.

For peer review only

1  
2  
3  
4  
5  
6  
7  
8  
9  
10  
11  
12  
13  
14  
15  
16  
17  
18  
19  
20  
21  
22  
23  
24  
25  
26  
27  
28  
29  
30  
31  
32  
33  
34  
35  
36  
37  
38  
39  
40  
41  
42  
43  
44  
45  
46  
47  
48  
49

|                                               |                                                                                                                                        |      |                                                            |                           |    |                                                                                                         |                                                          |                                                        |                                                                                                                                             |    |                                                                                                                                                                                                                                                                                                                                                                                                                           |                                                                                                                                                                                  |                                                                                                                                                                                                                          |                                                                                                                                                                                            |    |    |                                                                                                                                                                                         |                                                |    |                                     |
|-----------------------------------------------|----------------------------------------------------------------------------------------------------------------------------------------|------|------------------------------------------------------------|---------------------------|----|---------------------------------------------------------------------------------------------------------|----------------------------------------------------------|--------------------------------------------------------|---------------------------------------------------------------------------------------------------------------------------------------------|----|---------------------------------------------------------------------------------------------------------------------------------------------------------------------------------------------------------------------------------------------------------------------------------------------------------------------------------------------------------------------------------------------------------------------------|----------------------------------------------------------------------------------------------------------------------------------------------------------------------------------|--------------------------------------------------------------------------------------------------------------------------------------------------------------------------------------------------------------------------|--------------------------------------------------------------------------------------------------------------------------------------------------------------------------------------------|----|----|-----------------------------------------------------------------------------------------------------------------------------------------------------------------------------------------|------------------------------------------------|----|-------------------------------------|
| Knight J.S.<br>Senapati A.<br>Lamparelli M.J. | National UK audit of procedure for prolapsing haemorrhoids on behalf of the Association of Coloproctology of Great Britain and Ireland | 2008 | National UK audit of procedure for prolapsing haemorrhoids | Stapled haemorrhoidectomy | NS | Research and Audit Committee of the Association of Coloproctology of Great Britain and Ireland (ACPGBI) | To collect prospective data on stapled haemorrhoidectomy | Electronic online database through the ACPGBI website. | Electronic database and online entry process were sponsored by Ethicon Endo-Surgery, but they had no input or access to the data collected. | NS | Data were collected on the grade and symptoms of haemorrhoids, the presence of any external component, previous treatment, grade of surgeon, type of anaesthetic, height of the staple line above the dentate line, length of hospital stay, immediate complications, pain on discharge and any problems encountered at 6-week follow-up, data were collected on the preoperative symptoms of haemorrhoids according to a | Following registration on the website, the surgeon obtained a secure personalised logon through which data were entered real time at the end of the case and at 6-week follow-up | Surgeons invited to enter data on the website. Reminders sent via email and through the Association's bulletins. This audit can form the basis of a future registry. Such a registry should be compulsory to submit data | 695 patients were entered onto the database by 61 UK surgeons (2005). Only 10% of the ACPGBI members contributed data. Data represents only 20% of the potential cases conducted in the UK | NS | NS | Short follow up of 6 weeks - not long enough to detect recurrence. Only 10% of the ACPGBI members contributed data. Data represents only 20% of the potential cases conducted in the UK | Provides a good reflection of current practice | NS | Personalised logon for each surgeon |
|-----------------------------------------------|----------------------------------------------------------------------------------------------------------------------------------------|------|------------------------------------------------------------|---------------------------|----|---------------------------------------------------------------------------------------------------------|----------------------------------------------------------|--------------------------------------------------------|---------------------------------------------------------------------------------------------------------------------------------------------|----|---------------------------------------------------------------------------------------------------------------------------------------------------------------------------------------------------------------------------------------------------------------------------------------------------------------------------------------------------------------------------------------------------------------------------|----------------------------------------------------------------------------------------------------------------------------------------------------------------------------------|--------------------------------------------------------------------------------------------------------------------------------------------------------------------------------------------------------------------------|--------------------------------------------------------------------------------------------------------------------------------------------------------------------------------------------|----|----|-----------------------------------------------------------------------------------------------------------------------------------------------------------------------------------------|------------------------------------------------|----|-------------------------------------|

1  
2  
3  
4  
5  
6  
7  
8  
9  
10  
11  
12<sup>s</sup>  
13  
14  
15  
16  
17  
18  
19  
20  
21  
22  
23  
24  
25  
26  
27  
28  
29  
30  
31  
32<sup>s</sup>  
33  
34  
35  
36  
37  
38  
39  
40  
41  
42  
43  
44  
45  
46  
47  
48  
49

previously validated symptom severity scoring system, however these data were not collected postoperatively,

|                                                                                      |                                                                                                      |      |                                         |                       |    |    |                                                                                                                                                                                                                                                                                 |    |    |                                                                                                              |                                                                                                                                                                                                                                                                                                                                                                                                                                                                                                                                                                                                                                                                                                                                                                                                                                                                                                                                                                                                                                                                               |                                                                                                                                                                                                                                                                                                                                                                                                                                                                                                                                                                                                                                                                                                                                                                                                                                                                                                                                                                          |    |                                                                                                                                                                                                                                                                                                                                                                                                                                                                                                                                                                                                                                                                                                                                                                                                                                                        |                                                  |    |                                                                                                                                                                                                                                                                                                                                                                                                                                                                                                                                                                                                                                                                                                                                                                                                                                                                                                                                                                                                                                                                                                                                                                                                                                |                                                                                                                                                                                         |                                                                                                                                                                            |                                                                |
|--------------------------------------------------------------------------------------|------------------------------------------------------------------------------------------------------|------|-----------------------------------------|-----------------------|----|----|---------------------------------------------------------------------------------------------------------------------------------------------------------------------------------------------------------------------------------------------------------------------------------|----|----|--------------------------------------------------------------------------------------------------------------|-------------------------------------------------------------------------------------------------------------------------------------------------------------------------------------------------------------------------------------------------------------------------------------------------------------------------------------------------------------------------------------------------------------------------------------------------------------------------------------------------------------------------------------------------------------------------------------------------------------------------------------------------------------------------------------------------------------------------------------------------------------------------------------------------------------------------------------------------------------------------------------------------------------------------------------------------------------------------------------------------------------------------------------------------------------------------------|--------------------------------------------------------------------------------------------------------------------------------------------------------------------------------------------------------------------------------------------------------------------------------------------------------------------------------------------------------------------------------------------------------------------------------------------------------------------------------------------------------------------------------------------------------------------------------------------------------------------------------------------------------------------------------------------------------------------------------------------------------------------------------------------------------------------------------------------------------------------------------------------------------------------------------------------------------------------------|----|--------------------------------------------------------------------------------------------------------------------------------------------------------------------------------------------------------------------------------------------------------------------------------------------------------------------------------------------------------------------------------------------------------------------------------------------------------------------------------------------------------------------------------------------------------------------------------------------------------------------------------------------------------------------------------------------------------------------------------------------------------------------------------------------------------------------------------------------------------|--------------------------------------------------|----|--------------------------------------------------------------------------------------------------------------------------------------------------------------------------------------------------------------------------------------------------------------------------------------------------------------------------------------------------------------------------------------------------------------------------------------------------------------------------------------------------------------------------------------------------------------------------------------------------------------------------------------------------------------------------------------------------------------------------------------------------------------------------------------------------------------------------------------------------------------------------------------------------------------------------------------------------------------------------------------------------------------------------------------------------------------------------------------------------------------------------------------------------------------------------------------------------------------------------------|-----------------------------------------------------------------------------------------------------------------------------------------------------------------------------------------|----------------------------------------------------------------------------------------------------------------------------------------------------------------------------|----------------------------------------------------------------|
| Nelson P. Nieuwenhuijzen M. Jensen T.K. Mouriquand P. Hughes I. Wilcox D. Elliott P. | Prevalence of hypospadias in the same geographic region as ascertained by three different registries | 2007 | Hypospadias surgeons register           | Hypospadias surgery   | NS | NS | To compare the birth prevalence and ascertainment of hypospadias in a population-based hypospadias case register                                                                                                                                                                | NS | NS | NS                                                                                                           | Demographics, birth prevalence.                                                                                                                                                                                                                                                                                                                                                                                                                                                                                                                                                                                                                                                                                                                                                                                                                                                                                                                                                                                                                                               | Data sources included waiting lists, surgeons' diaries, operating theatre logbooks and databases, personal records, clinic letters, hospital databases, and private patient records. Data was also collected from the National Congenital Anomaly System (NCAS), and Hospital Episode Statistics (HES). Data were checked for duplication within and between surgical centres                                                                                                                                                                                                                                                                                                                                                                                                                                                                                                                                                                                            | NS | NS                                                                                                                                                                                                                                                                                                                                                                                                                                                                                                                                                                                                                                                                                                                                                                                                                                                     | NS                                               | NS | NS                                                                                                                                                                                                                                                                                                                                                                                                                                                                                                                                                                                                                                                                                                                                                                                                                                                                                                                                                                                                                                                                                                                                                                                                                             | Registry data are vital for congenital anomaly surveillance both for health care planning and also in monitoring the potential impact of environmental chemicals on reproductive health | This registry was relatively successful because it has multiple sources of ascertainment, dedicated staff and resources, and a well designed and quality assured structure | All data were held by the UK Small Area Health Statistics Unit |
| Sharma S. Dregthon C.R.                                                              | Registry of shoulder arthroplasty - The Scottish experience                                          | 2006 | Scottish shoulder arthroplasty registry | Shoulder arthroplasty | NS | NS | To assess contemporary practice (including number and type of prosthesis), provide a benchmark against which surgeons could compare their practice, identify risk factors for a poor outcome, and to improve outcomes through continuous feedback to the participating surgeons | NS | NS | Participating surgeons agreed on a standardised diagnostic and operation code to facilitate data collection. | Patient demographics, date of surgery, grade of surgeon, indication, Rotator Cuff status, Glenoid deficiency, type of implant used, procedure performed, intraoperative problems (yes/no), complications, postoperative pain, sleep, activity and patient satisfaction (with regards to the results of your operation, do you feel pleased, satisfied, disappointed) were assessed annually using another standardised diagnostic and operation code to facilitate data collection. The senior author collated these data on a computerised database (Microsoft Access) and provided annual feedback to the individual surgeons. In order to evaluate the percentage of shoulder arthroplasties performed in Scotland to those registered in the registry, we cross-referenced our data with the data from the Information and Statistics Division (ISD), which is based in Edinburgh. ISD gets data from the Scottish medical records (SMR) forms that accompany every in-patient admission in Scotland. The ISD data do, however, rely on accurate coding and therefore its | The registry was voluntary and relied on a single surgeon (CRD) collecting, collating and providing feedback to the individual contributing surgeons. Surgeons were individually contacted by the senior author and encouraged to contribute to the registry. The participating surgeons agreed on a standardised diagnostic and operation code to facilitate data collection. The senior author collated these data on a computerised database (Microsoft Access) and provided annual feedback to the individual surgeons. In order to evaluate the percentage of shoulder arthroplasties performed in Scotland to those registered in the registry, we cross-referenced our data with the data from the Information and Statistics Division (ISD), which is based in Edinburgh. ISD gets data from the Scottish medical records (SMR) forms that accompany every in-patient admission in Scotland. The ISD data do, however, rely on accurate coding and therefore its | NS | A total of 451 shoulder arthroplasties were registered over a 5-year period. Cross referencing the data with the data from the Information and Statistics Division in Scotland, we found that 25/200 shoulder arthroplasties performed in 1996, 91/225 cases in 1997, 167/315 cases in 1998, 85/260 cases in 1999 and 41/255 cases in 2000 were registered in our registry. Contributions to the registry increased from 12% of all shoulder arthroplasties performed in the first year of the registry to 53% in the third year. There was then a drop in the percentage of shoulder arthroplasties registered over the next 2 years so that in the 5th year of the registry only 18% of the shoulder arthroplasties performed were registered - this drop was mainly due to financial and time constraints which resulted in the 4th annual registry | Annual feedback given to the individual surgeons | NS | Compliance in data collection. Expense of running a registry (the Mayo Clinic spends about \$400,000 annually to maintain its registry). Registry was voluntary and relied on a single surgeon (CRD) collecting, collating and providing feedback to the individual contributing surgeons. There were financial and time constraints which led to the 4th annual Registry meeting being cancelled - this resulted in a drop in the percentage of shoulder arthroplasties registered over the next 2 years. The voluntary registrations of data in our registry depended on a small group of dedicated shoulder surgeons who were keen to evaluate their performance and were motivated, albeit for a short spell, to contribute to the shoulder registry. It was logistically difficult to target all the orthopaedic surgeons in Scotland and motivate them to contribute voluntarily to the registry. Another factor for the poor percentage of registration was that orthopaedic surgeons who had no declared interest in shoulder arthroplasty were increasingly performing shoulder arthroplasties. Shoulder surgeons who performed 3 or fewer shoulder arthroplasties were performing 30% of the shoulder arthroplasties | Accuracy and completeness of data entered                                                                                                                                               | NS                                                                                                                                                                         |                                                                |

For peer review only



data may not be a true reflection of the number of shoulder arthroplasties performed in Scotland. This registry employs dedicated personnel for data collection, validation and ensuring compliance from the participating surgeons

meeting being cancelled

1  
2  
3  
4  
5  
6  
7  
8  
9  
10  
11  
12  
13  
14  
15  
16  
17  
18  
19  
20  
21  
22  
23  
24  
25  
26  
27  
28  
29  
30  
31  
32  
33  
34  
35  
36  
37  
38  
39  
40  
41  
42  
43  
44  
45  
46  
47  
48  
49

|                                                                 |                                                                                 |          |                                     |                        |                                                                                                                                                                                                                                           |                                                                                                           |                                                                                                                                          |                                                                                                                                                                                                                       |                                                                                                                                                                                                                      |                                                                                                                                                                                                                                                                                                                                                                                                                            |                                                |                                                                                                                                                                                              |                                                                                                                                                                                                                                                                                                                                                                                     |                                                                                                                                     |                                                                                                                                                     |    |    |                                                                                                                                                                                                                                                                                                                                                                                                                                                                                                                        |    |                                                                                                                                                                                                                                                                                                                                                                                                                                                                                                                                                                                                                                                                                                                                                                                                            |
|-----------------------------------------------------------------|---------------------------------------------------------------------------------|----------|-------------------------------------|------------------------|-------------------------------------------------------------------------------------------------------------------------------------------------------------------------------------------------------------------------------------------|-----------------------------------------------------------------------------------------------------------|------------------------------------------------------------------------------------------------------------------------------------------|-----------------------------------------------------------------------------------------------------------------------------------------------------------------------------------------------------------------------|----------------------------------------------------------------------------------------------------------------------------------------------------------------------------------------------------------------------|----------------------------------------------------------------------------------------------------------------------------------------------------------------------------------------------------------------------------------------------------------------------------------------------------------------------------------------------------------------------------------------------------------------------------|------------------------------------------------|----------------------------------------------------------------------------------------------------------------------------------------------------------------------------------------------|-------------------------------------------------------------------------------------------------------------------------------------------------------------------------------------------------------------------------------------------------------------------------------------------------------------------------------------------------------------------------------------|-------------------------------------------------------------------------------------------------------------------------------------|-----------------------------------------------------------------------------------------------------------------------------------------------------|----|----|------------------------------------------------------------------------------------------------------------------------------------------------------------------------------------------------------------------------------------------------------------------------------------------------------------------------------------------------------------------------------------------------------------------------------------------------------------------------------------------------------------------------|----|------------------------------------------------------------------------------------------------------------------------------------------------------------------------------------------------------------------------------------------------------------------------------------------------------------------------------------------------------------------------------------------------------------------------------------------------------------------------------------------------------------------------------------------------------------------------------------------------------------------------------------------------------------------------------------------------------------------------------------------------------------------------------------------------------------|
| Sher J.L.<br>Reed M.R.<br>Calvert P.<br>Wallace W.A.<br>Lamb A. | Influencing the national training agenda. The UK & Ireland orthopaedic eLogbook | 200<br>5 | UK and Ireland Orthopaedic eLogbook | Orthopaedic operations | British Orthopaedic Association (BOA) Education Committee, the Specialist Advisory Committee (SAC) in Trauma and Orthopaedics, the British Orthopaedic Trainees Association (BOTA) and the Royal College of Surgeons of Edinburgh (RCSEd) | Responsibility for the project has passed to the BOA eLogbook Validation & Authorisation Committee (eVAC) | To provide data on trainees operative experience and give an insight into their training operative experience in trauma and orthopaedics | Over several years a committed group of trainees and trainers tested several versions of the logbook leading to the current product. Current software was produced by the Faculty of Health Informatics at the RCSEd. | Funds were raised from the BOA (British orthopaedic association), the Editorial Board of the Journal of Bone and Joint Surgery, the Charley Trust, the Wishbone Trust, Smith & Nephew, Johnson & Johnson and Biomet. | After much debate, a system was devised to encompass the information needed by the United Kingdom and Irish SAC. Users can submit suggestions for unlisted procedures, which once ratified by the eVAC committee (eLogbook Validation & Authorisation Committee (eVAC), appear seamlessly as the users' 'Synchronisation' button is next pressed. The great majority of users' suggestions have been incorporated already. | Trainee level, level of involvement, operation | For data synchronisation, computers 'talk' to each other to check that their data is identical. If not, data is transferred by the main server at the Royal College of Surgeons of Edinburgh | By making the registry a 'thin' client application it means that no software has to be downloaded on to the users' computer. Rather the software relies on a live internet connection. This is more advantageous when most people have internet connections. Making the logbook compatible with portable devices. It is compulsory for all specialist registrars to submit the data | Compliance is 92%. Although the database now includes over 500 000 operations, the 2004 data represents 157 492 uploaded operations | The eLogbook gives information on levels of supervision and training opportunities provided by specific trainers, hospitals and training programmes | NS | NS | The database gives information on the training opportunities available and levels of supervision. It also helps compare training posts. This helps gain an insight into the trainees experience over a given time period and compare this against the national average. Training opportunities offered by training programmes, hospitals or trainers can also be compared with national figures. Such comparisons display not only total numbers of procedures but also identify unused potential learning experiences | NS | Because data which is defined as 'sensitive' or 'confidential' by the UK Data Protection Act is collected in the logbook, each user must register with the data protection authorities as a 'data controller'. The RCSEd server uses the same level of encryption security as bank web sites and the data is stored simultaneously on two servers which are regularly backed up off-site. Each user owns their data and collated information is administered by the eVAC committee. Access to the reports is restricted to defined users. Trainees have access to their own and pooled national comparative data. Training programme directors can examine a local individual's performance and individual trainers and hospitals. The SAC chairman has access to all regions and all training departments |
|-----------------------------------------------------------------|---------------------------------------------------------------------------------|----------|-------------------------------------|------------------------|-------------------------------------------------------------------------------------------------------------------------------------------------------------------------------------------------------------------------------------------|-----------------------------------------------------------------------------------------------------------|------------------------------------------------------------------------------------------------------------------------------------------|-----------------------------------------------------------------------------------------------------------------------------------------------------------------------------------------------------------------------|----------------------------------------------------------------------------------------------------------------------------------------------------------------------------------------------------------------------|----------------------------------------------------------------------------------------------------------------------------------------------------------------------------------------------------------------------------------------------------------------------------------------------------------------------------------------------------------------------------------------------------------------------------|------------------------------------------------|----------------------------------------------------------------------------------------------------------------------------------------------------------------------------------------------|-------------------------------------------------------------------------------------------------------------------------------------------------------------------------------------------------------------------------------------------------------------------------------------------------------------------------------------------------------------------------------------|-------------------------------------------------------------------------------------------------------------------------------------|-----------------------------------------------------------------------------------------------------------------------------------------------------|----|----|------------------------------------------------------------------------------------------------------------------------------------------------------------------------------------------------------------------------------------------------------------------------------------------------------------------------------------------------------------------------------------------------------------------------------------------------------------------------------------------------------------------------|----|------------------------------------------------------------------------------------------------------------------------------------------------------------------------------------------------------------------------------------------------------------------------------------------------------------------------------------------------------------------------------------------------------------------------------------------------------------------------------------------------------------------------------------------------------------------------------------------------------------------------------------------------------------------------------------------------------------------------------------------------------------------------------------------------------------|

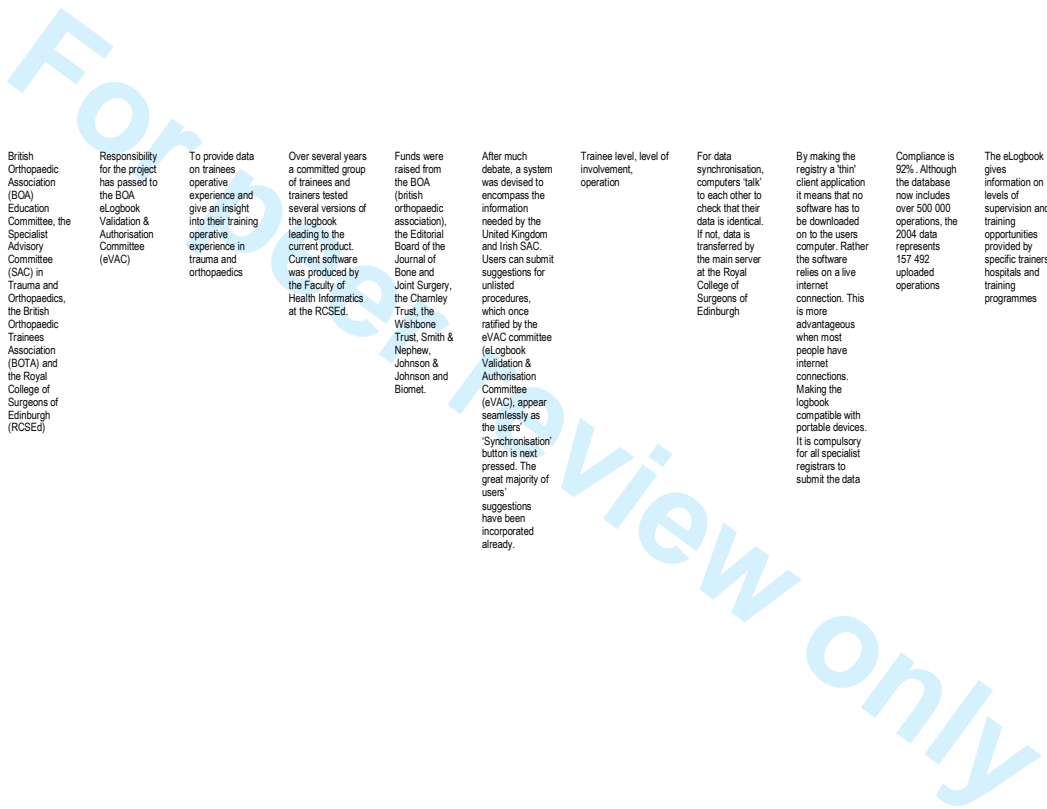

|    |             |                                                                                                                                      |      |                                                                     |                               |    |    |                                                                                                                                                                                                                                                                           |    |                                                                                                                                                                                                          |    |                                                                                                                                                                                                      |                                                                                                                                                                                                                                                                                                                                                                                                                                                                          |                                                                                                |                                                                                                                                                                                                                                                                                                                                                                                                                                                                                                                                                                                                                                                       |                                                                                   |                                                                                                                                                                    |                                                                                                                                                                                                                                                                                                                                                                                                                                                                                                                                                                                                                                                                         |                                                                                                                                                                                                                                                                                                                                                                                                                                                                                                                                                                                                                     |                                                                                                                                                                                                                                        |                                                                                                                                                                                                                                                                    |    |    |  |  |
|----|-------------|--------------------------------------------------------------------------------------------------------------------------------------|------|---------------------------------------------------------------------|-------------------------------|----|----|---------------------------------------------------------------------------------------------------------------------------------------------------------------------------------------------------------------------------------------------------------------------------|----|----------------------------------------------------------------------------------------------------------------------------------------------------------------------------------------------------------|----|------------------------------------------------------------------------------------------------------------------------------------------------------------------------------------------------------|--------------------------------------------------------------------------------------------------------------------------------------------------------------------------------------------------------------------------------------------------------------------------------------------------------------------------------------------------------------------------------------------------------------------------------------------------------------------------|------------------------------------------------------------------------------------------------|-------------------------------------------------------------------------------------------------------------------------------------------------------------------------------------------------------------------------------------------------------------------------------------------------------------------------------------------------------------------------------------------------------------------------------------------------------------------------------------------------------------------------------------------------------------------------------------------------------------------------------------------------------|-----------------------------------------------------------------------------------|--------------------------------------------------------------------------------------------------------------------------------------------------------------------|-------------------------------------------------------------------------------------------------------------------------------------------------------------------------------------------------------------------------------------------------------------------------------------------------------------------------------------------------------------------------------------------------------------------------------------------------------------------------------------------------------------------------------------------------------------------------------------------------------------------------------------------------------------------------|---------------------------------------------------------------------------------------------------------------------------------------------------------------------------------------------------------------------------------------------------------------------------------------------------------------------------------------------------------------------------------------------------------------------------------------------------------------------------------------------------------------------------------------------------------------------------------------------------------------------|----------------------------------------------------------------------------------------------------------------------------------------------------------------------------------------------------------------------------------------|--------------------------------------------------------------------------------------------------------------------------------------------------------------------------------------------------------------------------------------------------------------------|----|----|--|--|
| 1  | Thomas S.M. | Results from the prospective Registry of Endovascular Treatment of Abdominal Aortic Aneurysms (RETA); Mid term results to five years | 2005 | Registry for Endovascular Treatment of Aneurysms (RETA)             | Endovascular aneurysm repairs | NS | NS | To collect long-term data for endovascular aneurysm repairs in the UK                                                                                                                                                                                                     | NS | Financial support has been provided by the BSIR and VSGBI and by the following device companies, BARD UK Ltd, WIL Gore (UK) Ltd, Medtronic Ltd, Cook (UK) Ltd and Boston Scientific Ltd, and Cordis (UK) | NS | Demographics, ASA grade, stent graft type, fitness for surgery, aneurysm diameter, contraindications, indication for surgery, type of anaesthetic, complication rate, mortality rate, length of stay | A simple one-page follow-up form was sent out to the each centre on an annual basis, this follow up data could be returned by post, fax or via e-mail. Original submission of data was voluntary, and return of follow up data was dependent on the submitting centre in the majority of cases. Centres that failed to return forms were sent a further form, followed by a telephone reminder. The returned follow up data was manually entered into an Access database | Centres that failed to return forms were sent a further form, followed by a telephone reminder | Since its inception in 1996 a total of 1823 cases have been submitted to the Registry. One thousand cases were submitted to the Registry from 41 centres between 1st January 1996 and March 3rd 2000. The number of centres and cases increased each year until the EVAR trial began. Despite the best efforts of the Registry co-ordinator voluntary data submission resulted in returns rates for requested follow up data of 87% at 1 year and 77, 65, 52 and 51% at 2, 3, 4 and 5 years, respectively. Despite the best efforts of the Registry co-ordinator the returns rates we present in this paper fell from 87% at 1 year to 51% at 5 years | NS                                                                                | NS                                                                                                                                                                 | The database was voluntary which resulted in reduced data completion. It is very difficult to ensure data is submitted. Data submission to registries is usually voluntary which risks bias in the data submitted. Furthermore follow-up data becomes increasingly difficult to obtain. Despite the best efforts of the Registry co-ordinator the returns rates we present in this paper fell from 87% at 1 year to 51% at 5 years. If a large amount of data is submitted it is likely to be representative of practice at the time it is collected, but the results presented can only ever represent the best estimates within the limitations of the data collected | Registries can be of value in the assessment of new treatments. Regulatory organisations such as the UK National Institute for Clinical Excellence (NICE) will often accept that, in the absence of formal trials, registries can act as a means of assessment of new treatments or technologies. Registry data can provide useful insight into the results of new treatments, and can be used in planning trials and to generate hypotheses to be tested. The collection and analysis of data from registries should facilitate the early identification, quantification and correction of device-related problems | NS                                                                                                                                                                                                                                     | NS                                                                                                                                                                                                                                                                 |    |    |  |  |
| 2  | Beard J.D.  |                                                                                                                                      |      |                                                                     |                               |    |    |                                                                                                                                                                                                                                                                           |    |                                                                                                                                                                                                          |    |                                                                                                                                                                                                      |                                                                                                                                                                                                                                                                                                                                                                                                                                                                          |                                                                                                |                                                                                                                                                                                                                                                                                                                                                                                                                                                                                                                                                                                                                                                       |                                                                                   |                                                                                                                                                                    |                                                                                                                                                                                                                                                                                                                                                                                                                                                                                                                                                                                                                                                                         |                                                                                                                                                                                                                                                                                                                                                                                                                                                                                                                                                                                                                     |                                                                                                                                                                                                                                        |                                                                                                                                                                                                                                                                    |    |    |  |  |
| 3  | Ireland M.  |                                                                                                                                      |      |                                                                     |                               |    |    |                                                                                                                                                                                                                                                                           |    |                                                                                                                                                                                                          |    |                                                                                                                                                                                                      |                                                                                                                                                                                                                                                                                                                                                                                                                                                                          |                                                                                                |                                                                                                                                                                                                                                                                                                                                                                                                                                                                                                                                                                                                                                                       |                                                                                   |                                                                                                                                                                    |                                                                                                                                                                                                                                                                                                                                                                                                                                                                                                                                                                                                                                                                         |                                                                                                                                                                                                                                                                                                                                                                                                                                                                                                                                                                                                                     |                                                                                                                                                                                                                                        |                                                                                                                                                                                                                                                                    |    |    |  |  |
| 4  | Ayers S.    |                                                                                                                                      |      |                                                                     |                               |    |    |                                                                                                                                                                                                                                                                           |    |                                                                                                                                                                                                          |    |                                                                                                                                                                                                      |                                                                                                                                                                                                                                                                                                                                                                                                                                                                          |                                                                                                |                                                                                                                                                                                                                                                                                                                                                                                                                                                                                                                                                                                                                                                       |                                                                                   |                                                                                                                                                                    |                                                                                                                                                                                                                                                                                                                                                                                                                                                                                                                                                                                                                                                                         |                                                                                                                                                                                                                                                                                                                                                                                                                                                                                                                                                                                                                     |                                                                                                                                                                                                                                        |                                                                                                                                                                                                                                                                    |    |    |  |  |
| 5  |             |                                                                                                                                      |      |                                                                     |                               |    |    |                                                                                                                                                                                                                                                                           |    |                                                                                                                                                                                                          |    |                                                                                                                                                                                                      |                                                                                                                                                                                                                                                                                                                                                                                                                                                                          |                                                                                                |                                                                                                                                                                                                                                                                                                                                                                                                                                                                                                                                                                                                                                                       |                                                                                   |                                                                                                                                                                    |                                                                                                                                                                                                                                                                                                                                                                                                                                                                                                                                                                                                                                                                         |                                                                                                                                                                                                                                                                                                                                                                                                                                                                                                                                                                                                                     |                                                                                                                                                                                                                                        |                                                                                                                                                                                                                                                                    |    |    |  |  |
| 6  |             |                                                                                                                                      |      |                                                                     |                               |    |    |                                                                                                                                                                                                                                                                           |    |                                                                                                                                                                                                          |    |                                                                                                                                                                                                      |                                                                                                                                                                                                                                                                                                                                                                                                                                                                          |                                                                                                |                                                                                                                                                                                                                                                                                                                                                                                                                                                                                                                                                                                                                                                       |                                                                                   |                                                                                                                                                                    |                                                                                                                                                                                                                                                                                                                                                                                                                                                                                                                                                                                                                                                                         |                                                                                                                                                                                                                                                                                                                                                                                                                                                                                                                                                                                                                     |                                                                                                                                                                                                                                        |                                                                                                                                                                                                                                                                    |    |    |  |  |
| 7  |             |                                                                                                                                      |      |                                                                     |                               |    |    |                                                                                                                                                                                                                                                                           |    |                                                                                                                                                                                                          |    |                                                                                                                                                                                                      |                                                                                                                                                                                                                                                                                                                                                                                                                                                                          |                                                                                                |                                                                                                                                                                                                                                                                                                                                                                                                                                                                                                                                                                                                                                                       |                                                                                   |                                                                                                                                                                    |                                                                                                                                                                                                                                                                                                                                                                                                                                                                                                                                                                                                                                                                         |                                                                                                                                                                                                                                                                                                                                                                                                                                                                                                                                                                                                                     |                                                                                                                                                                                                                                        |                                                                                                                                                                                                                                                                    |    |    |  |  |
| 8  |             |                                                                                                                                      |      |                                                                     |                               |    |    |                                                                                                                                                                                                                                                                           |    |                                                                                                                                                                                                          |    |                                                                                                                                                                                                      |                                                                                                                                                                                                                                                                                                                                                                                                                                                                          |                                                                                                |                                                                                                                                                                                                                                                                                                                                                                                                                                                                                                                                                                                                                                                       |                                                                                   |                                                                                                                                                                    |                                                                                                                                                                                                                                                                                                                                                                                                                                                                                                                                                                                                                                                                         |                                                                                                                                                                                                                                                                                                                                                                                                                                                                                                                                                                                                                     |                                                                                                                                                                                                                                        |                                                                                                                                                                                                                                                                    |    |    |  |  |
| 9  |             |                                                                                                                                      |      |                                                                     |                               |    |    |                                                                                                                                                                                                                                                                           |    |                                                                                                                                                                                                          |    |                                                                                                                                                                                                      |                                                                                                                                                                                                                                                                                                                                                                                                                                                                          |                                                                                                |                                                                                                                                                                                                                                                                                                                                                                                                                                                                                                                                                                                                                                                       |                                                                                   |                                                                                                                                                                    |                                                                                                                                                                                                                                                                                                                                                                                                                                                                                                                                                                                                                                                                         |                                                                                                                                                                                                                                                                                                                                                                                                                                                                                                                                                                                                                     |                                                                                                                                                                                                                                        |                                                                                                                                                                                                                                                                    |    |    |  |  |
| 10 |             |                                                                                                                                      |      |                                                                     |                               |    |    |                                                                                                                                                                                                                                                                           |    |                                                                                                                                                                                                          |    |                                                                                                                                                                                                      |                                                                                                                                                                                                                                                                                                                                                                                                                                                                          |                                                                                                |                                                                                                                                                                                                                                                                                                                                                                                                                                                                                                                                                                                                                                                       |                                                                                   |                                                                                                                                                                    |                                                                                                                                                                                                                                                                                                                                                                                                                                                                                                                                                                                                                                                                         |                                                                                                                                                                                                                                                                                                                                                                                                                                                                                                                                                                                                                     |                                                                                                                                                                                                                                        |                                                                                                                                                                                                                                                                    |    |    |  |  |
| 11 |             |                                                                                                                                      |      |                                                                     |                               |    |    |                                                                                                                                                                                                                                                                           |    |                                                                                                                                                                                                          |    |                                                                                                                                                                                                      |                                                                                                                                                                                                                                                                                                                                                                                                                                                                          |                                                                                                |                                                                                                                                                                                                                                                                                                                                                                                                                                                                                                                                                                                                                                                       |                                                                                   |                                                                                                                                                                    |                                                                                                                                                                                                                                                                                                                                                                                                                                                                                                                                                                                                                                                                         |                                                                                                                                                                                                                                                                                                                                                                                                                                                                                                                                                                                                                     |                                                                                                                                                                                                                                        |                                                                                                                                                                                                                                                                    |    |    |  |  |
| 12 |             |                                                                                                                                      |      |                                                                     |                               |    |    |                                                                                                                                                                                                                                                                           |    |                                                                                                                                                                                                          |    |                                                                                                                                                                                                      |                                                                                                                                                                                                                                                                                                                                                                                                                                                                          |                                                                                                |                                                                                                                                                                                                                                                                                                                                                                                                                                                                                                                                                                                                                                                       |                                                                                   |                                                                                                                                                                    |                                                                                                                                                                                                                                                                                                                                                                                                                                                                                                                                                                                                                                                                         |                                                                                                                                                                                                                                                                                                                                                                                                                                                                                                                                                                                                                     |                                                                                                                                                                                                                                        |                                                                                                                                                                                                                                                                    |    |    |  |  |
| 13 |             |                                                                                                                                      |      |                                                                     |                               |    |    |                                                                                                                                                                                                                                                                           |    |                                                                                                                                                                                                          |    |                                                                                                                                                                                                      |                                                                                                                                                                                                                                                                                                                                                                                                                                                                          |                                                                                                |                                                                                                                                                                                                                                                                                                                                                                                                                                                                                                                                                                                                                                                       |                                                                                   |                                                                                                                                                                    |                                                                                                                                                                                                                                                                                                                                                                                                                                                                                                                                                                                                                                                                         |                                                                                                                                                                                                                                                                                                                                                                                                                                                                                                                                                                                                                     |                                                                                                                                                                                                                                        |                                                                                                                                                                                                                                                                    |    |    |  |  |
| 14 |             |                                                                                                                                      |      |                                                                     |                               |    |    |                                                                                                                                                                                                                                                                           |    |                                                                                                                                                                                                          |    |                                                                                                                                                                                                      |                                                                                                                                                                                                                                                                                                                                                                                                                                                                          |                                                                                                |                                                                                                                                                                                                                                                                                                                                                                                                                                                                                                                                                                                                                                                       |                                                                                   |                                                                                                                                                                    |                                                                                                                                                                                                                                                                                                                                                                                                                                                                                                                                                                                                                                                                         |                                                                                                                                                                                                                                                                                                                                                                                                                                                                                                                                                                                                                     |                                                                                                                                                                                                                                        |                                                                                                                                                                                                                                                                    |    |    |  |  |
| 15 |             |                                                                                                                                      |      |                                                                     |                               |    |    |                                                                                                                                                                                                                                                                           |    |                                                                                                                                                                                                          |    |                                                                                                                                                                                                      |                                                                                                                                                                                                                                                                                                                                                                                                                                                                          |                                                                                                |                                                                                                                                                                                                                                                                                                                                                                                                                                                                                                                                                                                                                                                       |                                                                                   |                                                                                                                                                                    |                                                                                                                                                                                                                                                                                                                                                                                                                                                                                                                                                                                                                                                                         |                                                                                                                                                                                                                                                                                                                                                                                                                                                                                                                                                                                                                     |                                                                                                                                                                                                                                        |                                                                                                                                                                                                                                                                    |    |    |  |  |
| 16 |             |                                                                                                                                      |      |                                                                     |                               |    |    |                                                                                                                                                                                                                                                                           |    |                                                                                                                                                                                                          |    |                                                                                                                                                                                                      |                                                                                                                                                                                                                                                                                                                                                                                                                                                                          |                                                                                                |                                                                                                                                                                                                                                                                                                                                                                                                                                                                                                                                                                                                                                                       |                                                                                   |                                                                                                                                                                    |                                                                                                                                                                                                                                                                                                                                                                                                                                                                                                                                                                                                                                                                         |                                                                                                                                                                                                                                                                                                                                                                                                                                                                                                                                                                                                                     |                                                                                                                                                                                                                                        |                                                                                                                                                                                                                                                                    |    |    |  |  |
| 17 |             |                                                                                                                                      |      |                                                                     |                               |    |    |                                                                                                                                                                                                                                                                           |    |                                                                                                                                                                                                          |    |                                                                                                                                                                                                      |                                                                                                                                                                                                                                                                                                                                                                                                                                                                          |                                                                                                |                                                                                                                                                                                                                                                                                                                                                                                                                                                                                                                                                                                                                                                       |                                                                                   |                                                                                                                                                                    |                                                                                                                                                                                                                                                                                                                                                                                                                                                                                                                                                                                                                                                                         |                                                                                                                                                                                                                                                                                                                                                                                                                                                                                                                                                                                                                     |                                                                                                                                                                                                                                        |                                                                                                                                                                                                                                                                    |    |    |  |  |
| 18 |             |                                                                                                                                      |      |                                                                     |                               |    |    |                                                                                                                                                                                                                                                                           |    |                                                                                                                                                                                                          |    |                                                                                                                                                                                                      |                                                                                                                                                                                                                                                                                                                                                                                                                                                                          |                                                                                                |                                                                                                                                                                                                                                                                                                                                                                                                                                                                                                                                                                                                                                                       |                                                                                   |                                                                                                                                                                    |                                                                                                                                                                                                                                                                                                                                                                                                                                                                                                                                                                                                                                                                         |                                                                                                                                                                                                                                                                                                                                                                                                                                                                                                                                                                                                                     |                                                                                                                                                                                                                                        |                                                                                                                                                                                                                                                                    |    |    |  |  |
| 19 |             |                                                                                                                                      |      |                                                                     |                               |    |    |                                                                                                                                                                                                                                                                           |    |                                                                                                                                                                                                          |    |                                                                                                                                                                                                      |                                                                                                                                                                                                                                                                                                                                                                                                                                                                          |                                                                                                |                                                                                                                                                                                                                                                                                                                                                                                                                                                                                                                                                                                                                                                       |                                                                                   |                                                                                                                                                                    |                                                                                                                                                                                                                                                                                                                                                                                                                                                                                                                                                                                                                                                                         |                                                                                                                                                                                                                                                                                                                                                                                                                                                                                                                                                                                                                     |                                                                                                                                                                                                                                        |                                                                                                                                                                                                                                                                    |    |    |  |  |
| 20 |             |                                                                                                                                      |      |                                                                     |                               |    |    |                                                                                                                                                                                                                                                                           |    |                                                                                                                                                                                                          |    |                                                                                                                                                                                                      |                                                                                                                                                                                                                                                                                                                                                                                                                                                                          |                                                                                                |                                                                                                                                                                                                                                                                                                                                                                                                                                                                                                                                                                                                                                                       |                                                                                   |                                                                                                                                                                    |                                                                                                                                                                                                                                                                                                                                                                                                                                                                                                                                                                                                                                                                         |                                                                                                                                                                                                                                                                                                                                                                                                                                                                                                                                                                                                                     |                                                                                                                                                                                                                                        |                                                                                                                                                                                                                                                                    |    |    |  |  |
| 21 |             |                                                                                                                                      |      |                                                                     |                               |    |    |                                                                                                                                                                                                                                                                           |    |                                                                                                                                                                                                          |    |                                                                                                                                                                                                      |                                                                                                                                                                                                                                                                                                                                                                                                                                                                          |                                                                                                |                                                                                                                                                                                                                                                                                                                                                                                                                                                                                                                                                                                                                                                       |                                                                                   |                                                                                                                                                                    |                                                                                                                                                                                                                                                                                                                                                                                                                                                                                                                                                                                                                                                                         |                                                                                                                                                                                                                                                                                                                                                                                                                                                                                                                                                                                                                     |                                                                                                                                                                                                                                        |                                                                                                                                                                                                                                                                    |    |    |  |  |
| 22 |             |                                                                                                                                      |      |                                                                     |                               |    |    |                                                                                                                                                                                                                                                                           |    |                                                                                                                                                                                                          |    |                                                                                                                                                                                                      |                                                                                                                                                                                                                                                                                                                                                                                                                                                                          |                                                                                                |                                                                                                                                                                                                                                                                                                                                                                                                                                                                                                                                                                                                                                                       |                                                                                   |                                                                                                                                                                    |                                                                                                                                                                                                                                                                                                                                                                                                                                                                                                                                                                                                                                                                         |                                                                                                                                                                                                                                                                                                                                                                                                                                                                                                                                                                                                                     |                                                                                                                                                                                                                                        |                                                                                                                                                                                                                                                                    |    |    |  |  |
| 23 | Wyatt M.G.  | Registries versus trials for the evaluation of the Endovascular Treatment of Abdominal Aortic Aneurysms                              | 2005 | RETA registry (UK registry for Endovascular Treatment of Aneurysms) | Endovascular aneurysm repairs | NS | NS | This is a commentary discussing registries versus trials for the evaluation of endovascular aneurysm repairs. It also describes the RETA registry (UK registry for Endovascular Treatment of Aneurysms). Aim of RETA Registry was to audit EVAR deployments within the UK | NS | NS                                                                                                                                                                                                       | NS | NS                                                                                                                                                                                                   | NS                                                                                                                                                                                                                                                                                                                                                                                                                                                                       | NS                                                                                             | NS                                                                                                                                                                                                                                                                                                                                                                                                                                                                                                                                                                                                                                                    | RETA registry contains both retrospective and prospective data on 1823 procedures | RETA registry annual audit reports are produced on behalf of the Vascular Society of Great Britain and Ireland and the British Society of Interventional Radiology | NS                                                                                                                                                                                                                                                                                                                                                                                                                                                                                                                                                                                                                                                                      | NS                                                                                                                                                                                                                                                                                                                                                                                                                                                                                                                                                                                                                  | Registry data is often incomplete and may present a biased view of the overall performance of new technologies. The RETA registry suffers in that it is voluntary and audited in an 'open' fashion, possibly leading to selection bias | Registries can be used to help RCT design. Data from the RETA registry was used in the design of the UK EVAR trials and as an audit tool to assess centres for trial entry. RETA registry has been an invaluable source of data on the performance of EVAR devices | NS | NS |  |  |
| 24 |             |                                                                                                                                      |      |                                                                     |                               |    |    |                                                                                                                                                                                                                                                                           |    |                                                                                                                                                                                                          |    |                                                                                                                                                                                                      |                                                                                                                                                                                                                                                                                                                                                                                                                                                                          |                                                                                                |                                                                                                                                                                                                                                                                                                                                                                                                                                                                                                                                                                                                                                                       |                                                                                   |                                                                                                                                                                    |                                                                                                                                                                                                                                                                                                                                                                                                                                                                                                                                                                                                                                                                         |                                                                                                                                                                                                                                                                                                                                                                                                                                                                                                                                                                                                                     |                                                                                                                                                                                                                                        |                                                                                                                                                                                                                                                                    |    |    |  |  |
| 25 |             |                                                                                                                                      |      |                                                                     |                               |    |    |                                                                                                                                                                                                                                                                           |    |                                                                                                                                                                                                          |    |                                                                                                                                                                                                      |                                                                                                                                                                                                                                                                                                                                                                                                                                                                          |                                                                                                |                                                                                                                                                                                                                                                                                                                                                                                                                                                                                                                                                                                                                                                       |                                                                                   |                                                                                                                                                                    |                                                                                                                                                                                                                                                                                                                                                                                                                                                                                                                                                                                                                                                                         |                                                                                                                                                                                                                                                                                                                                                                                                                                                                                                                                                                                                                     |                                                                                                                                                                                                                                        |                                                                                                                                                                                                                                                                    |    |    |  |  |
| 26 |             |                                                                                                                                      |      |                                                                     |                               |    |    |                                                                                                                                                                                                                                                                           |    |                                                                                                                                                                                                          |    |                                                                                                                                                                                                      |                                                                                                                                                                                                                                                                                                                                                                                                                                                                          |                                                                                                |                                                                                                                                                                                                                                                                                                                                                                                                                                                                                                                                                                                                                                                       |                                                                                   |                                                                                                                                                                    |                                                                                                                                                                                                                                                                                                                                                                                                                                                                                                                                                                                                                                                                         |                                                                                                                                                                                                                                                                                                                                                                                                                                                                                                                                                                                                                     |                                                                                                                                                                                                                                        |                                                                                                                                                                                                                                                                    |    |    |  |  |
| 27 |             |                                                                                                                                      |      |                                                                     |                               |    |    |                                                                                                                                                                                                                                                                           |    |                                                                                                                                                                                                          |    |                                                                                                                                                                                                      |                                                                                                                                                                                                                                                                                                                                                                                                                                                                          |                                                                                                |                                                                                                                                                                                                                                                                                                                                                                                                                                                                                                                                                                                                                                                       |                                                                                   |                                                                                                                                                                    |                                                                                                                                                                                                                                                                                                                                                                                                                                                                                                                                                                                                                                                                         |                                                                                                                                                                                                                                                                                                                                                                                                                                                                                                                                                                                                                     |                                                                                                                                                                                                                                        |                                                                                                                                                                                                                                                                    |    |    |  |  |
| 28 |             |                                                                                                                                      |      |                                                                     |                               |    |    |                                                                                                                                                                                                                                                                           |    |                                                                                                                                                                                                          |    |                                                                                                                                                                                                      |                                                                                                                                                                                                                                                                                                                                                                                                                                                                          |                                                                                                |                                                                                                                                                                                                                                                                                                                                                                                                                                                                                                                                                                                                                                                       |                                                                                   |                                                                                                                                                                    |                                                                                                                                                                                                                                                                                                                                                                                                                                                                                                                                                                                                                                                                         |                                                                                                                                                                                                                                                                                                                                                                                                                                                                                                                                                                                                                     |                                                                                                                                                                                                                                        |                                                                                                                                                                                                                                                                    |    |    |  |  |
| 29 |             |                                                                                                                                      |      |                                                                     |                               |    |    |                                                                                                                                                                                                                                                                           |    |                                                                                                                                                                                                          |    |                                                                                                                                                                                                      |                                                                                                                                                                                                                                                                                                                                                                                                                                                                          |                                                                                                |                                                                                                                                                                                                                                                                                                                                                                                                                                                                                                                                                                                                                                                       |                                                                                   |                                                                                                                                                                    |                                                                                                                                                                                                                                                                                                                                                                                                                                                                                                                                                                                                                                                                         |                                                                                                                                                                                                                                                                                                                                                                                                                                                                                                                                                                                                                     |                                                                                                                                                                                                                                        |                                                                                                                                                                                                                                                                    |    |    |  |  |
| 30 |             |                                                                                                                                      |      |                                                                     |                               |    |    |                                                                                                                                                                                                                                                                           |    |                                                                                                                                                                                                          |    |                                                                                                                                                                                                      |                                                                                                                                                                                                                                                                                                                                                                                                                                                                          |                                                                                                |                                                                                                                                                                                                                                                                                                                                                                                                                                                                                                                                                                                                                                                       |                                                                                   |                                                                                                                                                                    |                                                                                                                                                                                                                                                                                                                                                                                                                                                                                                                                                                                                                                                                         |                                                                                                                                                                                                                                                                                                                                                                                                                                                                                                                                                                                                                     |                                                                                                                                                                                                                                        |                                                                                                                                                                                                                                                                    |    |    |  |  |
| 31 |             |                                                                                                                                      |      |                                                                     |                               |    |    |                                                                                                                                                                                                                                                                           |    |                                                                                                                                                                                                          |    |                                                                                                                                                                                                      |                                                                                                                                                                                                                                                                                                                                                                                                                                                                          |                                                                                                |                                                                                                                                                                                                                                                                                                                                                                                                                                                                                                                                                                                                                                                       |                                                                                   |                                                                                                                                                                    |                                                                                                                                                                                                                                                                                                                                                                                                                                                                                                                                                                                                                                                                         |                                                                                                                                                                                                                                                                                                                                                                                                                                                                                                                                                                                                                     |                                                                                                                                                                                                                                        |                                                                                                                                                                                                                                                                    |    |    |  |  |
| 32 |             |                                                                                                                                      |      |                                                                     |                               |    |    |                                                                                                                                                                                                                                                                           |    |                                                                                                                                                                                                          |    |                                                                                                                                                                                                      |                                                                                                                                                                                                                                                                                                                                                                                                                                                                          |                                                                                                |                                                                                                                                                                                                                                                                                                                                                                                                                                                                                                                                                                                                                                                       |                                                                                   |                                                                                                                                                                    |                                                                                                                                                                                                                                                                                                                                                                                                                                                                                                                                                                                                                                                                         |                                                                                                                                                                                                                                                                                                                                                                                                                                                                                                                                                                                                                     |                                                                                                                                                                                                                                        |                                                                                                                                                                                                                                                                    |    |    |  |  |
| 33 |             |                                                                                                                                      |      |                                                                     |                               |    |    |                                                                                                                                                                                                                                                                           |    |                                                                                                                                                                                                          |    |                                                                                                                                                                                                      |                                                                                                                                                                                                                                                                                                                                                                                                                                                                          |                                                                                                |                                                                                                                                                                                                                                                                                                                                                                                                                                                                                                                                                                                                                                                       |                                                                                   |                                                                                                                                                                    |                                                                                                                                                                                                                                                                                                                                                                                                                                                                                                                                                                                                                                                                         |                                                                                                                                                                                                                                                                                                                                                                                                                                                                                                                                                                                                                     |                                                                                                                                                                                                                                        |                                                                                                                                                                                                                                                                    |    |    |  |  |
| 34 |             |                                                                                                                                      |      |                                                                     |                               |    |    |                                                                                                                                                                                                                                                                           |    |                                                                                                                                                                                                          |    |                                                                                                                                                                                                      |                                                                                                                                                                                                                                                                                                                                                                                                                                                                          |                                                                                                |                                                                                                                                                                                                                                                                                                                                                                                                                                                                                                                                                                                                                                                       |                                                                                   |                                                                                                                                                                    |                                                                                                                                                                                                                                                                                                                                                                                                                                                                                                                                                                                                                                                                         |                                                                                                                                                                                                                                                                                                                                                                                                                                                                                                                                                                                                                     |                                                                                                                                                                                                                                        |                                                                                                                                                                                                                                                                    |    |    |  |  |
| 35 |             |                                                                                                                                      |      |                                                                     |                               |    |    |                                                                                                                                                                                                                                                                           |    |                                                                                                                                                                                                          |    |                                                                                                                                                                                                      |                                                                                                                                                                                                                                                                                                                                                                                                                                                                          |                                                                                                |                                                                                                                                                                                                                                                                                                                                                                                                                                                                                                                                                                                                                                                       |                                                                                   |                                                                                                                                                                    |                                                                                                                                                                                                                                                                                                                                                                                                                                                                                                                                                                                                                                                                         |                                                                                                                                                                                                                                                                                                                                                                                                                                                                                                                                                                                                                     |                                                                                                                                                                                                                                        |                                                                                                                                                                                                                                                                    |    |    |  |  |
| 36 |             |                                                                                                                                      |      |                                                                     |                               |    |    |                                                                                                                                                                                                                                                                           |    |                                                                                                                                                                                                          |    |                                                                                                                                                                                                      |                                                                                                                                                                                                                                                                                                                                                                                                                                                                          |                                                                                                |                                                                                                                                                                                                                                                                                                                                                                                                                                                                                                                                                                                                                                                       |                                                                                   |                                                                                                                                                                    |                                                                                                                                                                                                                                                                                                                                                                                                                                                                                                                                                                                                                                                                         |                                                                                                                                                                                                                                                                                                                                                                                                                                                                                                                                                                                                                     |                                                                                                                                                                                                                                        |                                                                                                                                                                                                                                                                    |    |    |  |  |
| 37 |             |                                                                                                                                      |      |                                                                     |                               |    |    |                                                                                                                                                                                                                                                                           |    |                                                                                                                                                                                                          |    |                                                                                                                                                                                                      |                                                                                                                                                                                                                                                                                                                                                                                                                                                                          |                                                                                                |                                                                                                                                                                                                                                                                                                                                                                                                                                                                                                                                                                                                                                                       |                                                                                   |                                                                                                                                                                    |                                                                                                                                                                                                                                                                                                                                                                                                                                                                                                                                                                                                                                                                         |                                                                                                                                                                                                                                                                                                                                                                                                                                                                                                                                                                                                                     |                                                                                                                                                                                                                                        |                                                                                                                                                                                                                                                                    |    |    |  |  |
| 38 |             |                                                                                                                                      |      |                                                                     |                               |    |    |                                                                                                                                                                                                                                                                           |    |                                                                                                                                                                                                          |    |                                                                                                                                                                                                      |                                                                                                                                                                                                                                                                                                                                                                                                                                                                          |                                                                                                |                                                                                                                                                                                                                                                                                                                                                                                                                                                                                                                                                                                                                                                       |                                                                                   |                                                                                                                                                                    |                                                                                                                                                                                                                                                                                                                                                                                                                                                                                                                                                                                                                                                                         |                                                                                                                                                                                                                                                                                                                                                                                                                                                                                                                                                                                                                     |                                                                                                                                                                                                                                        |                                                                                                                                                                                                                                                                    |    |    |  |  |
| 39 |             |                                                                                                                                      |      |                                                                     |                               |    |    |                                                                                                                                                                                                                                                                           |    |                                                                                                                                                                                                          |    |                                                                                                                                                                                                      |                                                                                                                                                                                                                                                                                                                                                                                                                                                                          |                                                                                                |                                                                                                                                                                                                                                                                                                                                                                                                                                                                                                                                                                                                                                                       |                                                                                   |                                                                                                                                                                    |                                                                                                                                                                                                                                                                                                                                                                                                                                                                                                                                                                                                                                                                         |                                                                                                                                                                                                                                                                                                                                                                                                                                                                                                                                                                                                                     |                                                                                                                                                                                                                                        |                                                                                                                                                                                                                                                                    |    |    |  |  |
| 40 |             |                                                                                                                                      |      |                                                                     |                               |    |    |                                                                                                                                                                                                                                                                           |    |                                                                                                                                                                                                          |    |                                                                                                                                                                                                      |                                                                                                                                                                                                                                                                                                                                                                                                                                                                          |                                                                                                |                                                                                                                                                                                                                                                                                                                                                                                                                                                                                                                                                                                                                                                       |                                                                                   |                                                                                                                                                                    |                                                                                                                                                                                                                                                                                                                                                                                                                                                                                                                                                                                                                                                                         |                                                                                                                                                                                                                                                                                                                                                                                                                                                                                                                                                                                                                     |                                                                                                                                                                                                                                        |                                                                                                                                                                                                                                                                    |    |    |  |  |
| 41 |             |                                                                                                                                      |      |                                                                     |                               |    |    |                                                                                                                                                                                                                                                                           |    |                                                                                                                                                                                                          |    |                                                                                                                                                                                                      |                                                                                                                                                                                                                                                                                                                                                                                                                                                                          |                                                                                                |                                                                                                                                                                                                                                                                                                                                                                                                                                                                                                                                                                                                                                                       |                                                                                   |                                                                                                                                                                    |                                                                                                                                                                                                                                                                                                                                                                                                                                                                                                                                                                                                                                                                         |                                                                                                                                                                                                                                                                                                                                                                                                                                                                                                                                                                                                                     |                                                                                                                                                                                                                                        |                                                                                                                                                                                                                                                                    |    |    |  |  |
| 42 |             |                                                                                                                                      |      |                                                                     |                               |    |    |                                                                                                                                                                                                                                                                           |    |                                                                                                                                                                                                          |    |                                                                                                                                                                                                      |                                                                                                                                                                                                                                                                                                                                                                                                                                                                          |                                                                                                |                                                                                                                                                                                                                                                                                                                                                                                                                                                                                                                                                                                                                                                       |                                                                                   |                                                                                                                                                                    |                                                                                                                                                                                                                                                                                                                                                                                                                                                                                                                                                                                                                                                                         |                                                                                                                                                                                                                                                                                                                                                                                                                                                                                                                                                                                                                     |                                                                                                                                                                                                                                        |                                                                                                                                                                                                                                                                    |    |    |  |  |
| 43 |             |                                                                                                                                      |      |                                                                     |                               |    |    |                                                                                                                                                                                                                                                                           |    |                                                                                                                                                                                                          |    |                                                                                                                                                                                                      |                                                                                                                                                                                                                                                                                                                                                                                                                                                                          |                                                                                                |                                                                                                                                                                                                                                                                                                                                                                                                                                                                                                                                                                                                                                                       |                                                                                   |                                                                                                                                                                    |                                                                                                                                                                                                                                                                                                                                                                                                                                                                                                                                                                                                                                                                         |                                                                                                                                                                                                                                                                                                                                                                                                                                                                                                                                                                                                                     |                                                                                                                                                                                                                                        |                                                                                                                                                                                                                                                                    |    |    |  |  |
| 44 |             |                                                                                                                                      |      |                                                                     |                               |    |    |                                                                                                                                                                                                                                                                           |    |                                                                                                                                                                                                          |    |                                                                                                                                                                                                      |                                                                                                                                                                                                                                                                                                                                                                                                                                                                          |                                                                                                |                                                                                                                                                                                                                                                                                                                                                                                                                                                                                                                                                                                                                                                       |                                                                                   |                                                                                                                                                                    |                                                                                                                                                                                                                                                                                                                                                                                                                                                                                                                                                                                                                                                                         |                                                                                                                                                                                                                                                                                                                                                                                                                                                                                                                                                                                                                     |                                                                                                                                                                                                                                        |                                                                                                                                                                                                                                                                    |    |    |  |  |
| 45 |             |                                                                                                                                      |      |                                                                     |                               |    |    |                                                                                                                                                                                                                                                                           |    |                                                                                                                                                                                                          |    |                                                                                                                                                                                                      |                                                                                                                                                                                                                                                                                                                                                                                                                                                                          |                                                                                                |                                                                                                                                                                                                                                                                                                                                                                                                                                                                                                                                                                                                                                                       |                                                                                   |                                                                                                                                                                    |                                                                                                                                                                                                                                                                                                                                                                                                                                                                                                                                                                                                                                                                         |                                                                                                                                                                                                                                                                                                                                                                                                                                                                                                                                                                                                                     |                                                                                                                                                                                                                                        |                                                                                                                                                                                                                                                                    |    |    |  |  |
| 46 |             |                                                                                                                                      |      |                                                                     |                               |    |    |                                                                                                                                                                                                                                                                           |    |                                                                                                                                                                                                          |    |                                                                                                                                                                                                      |                                                                                                                                                                                                                                                                                                                                                                                                                                                                          |                                                                                                |                                                                                                                                                                                                                                                                                                                                                                                                                                                                                                                                                                                                                                                       |                                                                                   |                                                                                                                                                                    |                                                                                                                                                                                                                                                                                                                                                                                                                                                                                                                                                                                                                                                                         |                                                                                                                                                                                                                                                                                                                                                                                                                                                                                                                                                                                                                     |                                                                                                                                                                                                                                        |                                                                                                                                                                                                                                                                    |    |    |  |  |
| 47 |             |                                                                                                                                      |      |                                                                     |                               |    |    |                                                                                                                                                                                                                                                                           |    |                                                                                                                                                                                                          |    |                                                                                                                                                                                                      |                                                                                                                                                                                                                                                                                                                                                                                                                                                                          |                                                                                                |                                                                                                                                                                                                                                                                                                                                                                                                                                                                                                                                                                                                                                                       |                                                                                   |                                                                                                                                                                    |                                                                                                                                                                                                                                                                                                                                                                                                                                                                                                                                                                                                                                                                         |                                                                                                                                                                                                                                                                                                                                                                                                                                                                                                                                                                                                                     |                                                                                                                                                                                                                                        |                                                                                                                                                                                                                                                                    |    |    |  |  |
| 48 |             |                                                                                                                                      |      |                                                                     |                               |    |    |                                                                                                                                                                                                                                                                           |    |                                                                                                                                                                                                          |    |                                                                                                                                                                                                      |                                                                                                                                                                                                                                                                                                                                                                                                                                                                          |                                                                                                |                                                                                                                                                                                                                                                                                                                                                                                                                                                                                                                                                                                                                                                       |                                                                                   |                                                                                                                                                                    |                                                                                                                                                                                                                                                                                                                                                                                                                                                                                                                                                                                                                                                                         |                                                                                                                                                                                                                                                                                                                                                                                                                                                                                                                                                                                                                     |                                                                                                                                                                                                                                        |                                                                                                                                                                                                                                                                    |    |    |  |  |
| 49 |             |                                                                                                                                      |      |                                                                     |                               |    |    |                                                                                                                                                                                                                                                                           |    |                                                                                                                                                                                                          |    |                                                                                                                                                                                                      |                                                                                                                                                                                                                                                                                                                                                                                                                                                                          |                                                                                                |                                                                                                                                                                                                                                                                                                                                                                                                                                                                                                                                                                                                                                                       |                                                                                   |                                                                                                                                                                    |                                                                                                                                                                                                                                                                                                                                                                                                                                                                                                                                                                                                                                                                         |                                                                                                                                                                                                                                                                                                                                                                                                                                                                                                                                                                                                                     |                                                                                                                                                                                                                                        |                                                                                                                                                                                                                                                                    |    |    |  |  |

For peer review only

1  
2  
3  
4  
5  
6  
7  
8  
9  
10  
11  
12  
13  
14  
15  
16  
17<sup>0</sup>  
18  
19  
20  
21  
22  
23  
24  
25  
26  
27  
28  
29  
30  
31  
32  
33  
34  
35  
36  
37  
38  
39  
40  
41  
42  
43  
44  
45  
46  
47  
48  
49

|                  |                                               |      |                                    |                        |    |    |                                                                                                                       |    |                                                                                                                                                 |    |                                        |    |                                                                                                                                                                                                                                                    |                                                                                                                                                                                                                                                                     |                                                                                                                                                                          |    |                                                                                                                                                                                                                                                        |                                                                                                                                                                                                                                                                                                                             |                                                                                                                                                                                                                                                                         |                                                                                                                                                                                                                                                                                                                                                                                                                                                                                                                                                                                                                                                                                                                                                                                                                                                                                                                                                                                                                                                                                                                           |
|------------------|-----------------------------------------------|------|------------------------------------|------------------------|----|----|-----------------------------------------------------------------------------------------------------------------------|----|-------------------------------------------------------------------------------------------------------------------------------------------------|----|----------------------------------------|----|----------------------------------------------------------------------------------------------------------------------------------------------------------------------------------------------------------------------------------------------------|---------------------------------------------------------------------------------------------------------------------------------------------------------------------------------------------------------------------------------------------------------------------|--------------------------------------------------------------------------------------------------------------------------------------------------------------------------|----|--------------------------------------------------------------------------------------------------------------------------------------------------------------------------------------------------------------------------------------------------------|-----------------------------------------------------------------------------------------------------------------------------------------------------------------------------------------------------------------------------------------------------------------------------------------------------------------------------|-------------------------------------------------------------------------------------------------------------------------------------------------------------------------------------------------------------------------------------------------------------------------|---------------------------------------------------------------------------------------------------------------------------------------------------------------------------------------------------------------------------------------------------------------------------------------------------------------------------------------------------------------------------------------------------------------------------------------------------------------------------------------------------------------------------------------------------------------------------------------------------------------------------------------------------------------------------------------------------------------------------------------------------------------------------------------------------------------------------------------------------------------------------------------------------------------------------------------------------------------------------------------------------------------------------------------------------------------------------------------------------------------------------|
| Shakespeare P.G. | The UK breast implant registry - Ten years on | 2005 | UK Breast Implant Registry (UKBIR) | Breast implant surgery | NS | NS | The initial aim of the Registry was to record the use in the UK of all types of breast implant on a prospective basis | NS | MHRA. It is essential to have long-term funding as data will need to be collected for many years (lifetime expectation of implants is 37 years) | NS | Demographics, indication, implant type | NS | Directories of hospitals with theatre facilities were used to target individual units who might, or might not, be undertaking breast implant procedures. Contacts at responding centres were made, registration forms were prepared and circulated | Since 1993, the number of recorded procedures has risen steadily to reach a peak of approximately 14,000 in the year 2001. UKBIR now has some 80,000 patients registered as having undergone breast implant procedures. This involves in excess of 140,000 implants | Annual reports have been issued for each year of operation. Research projects using the data are being conducted which will help assess implant performance and lifespan | NS | In 2002 the registry started a new registration form in order to gain formal consent from patients regarding their data collection. This registration procedure has made the data collection process more complex resulting in a drop in registrations | UKBIR data can be used to audit process and can provide feedback data to individual centres for audit or information purposes. This registry can be a useful source of knowledge for tracing purposes in any advice on patient safety. The registry will help provide evaluation on breast implant performance and lifetime | The main purpose of a device registry is to describe the performance of implants in the broadest general sense, particularly assisting in the regulatory and safety aspects of implant use. Essential for registry to have good compliance amongst contributing centres | Since its foundation, the Registry has been guided by the Data Protection Act (1984, 1998), the Caldicott confidentiality principles, and guidance published by the General Medical Council (GMC). Upto 2002 there was no formal recorded consent from patients to record their data. Clinicians were asked to ensure that patients knew and agreed that registration would be made but, if a formal note was made, this was only to be found in the patient's notes. Although the Data Protection Act does not require explicit, written consent for personal data to be held, from 2002 the registry started to acquire formal consent from patients over registration and participation in research projects. Registration was with the Data Protection Registrar and confidentiality terms were defined. Individuals registered on the database have a right to all information recorded about them, but the Data Protection registration prevents disclosure of identifying information to a third party - this protects the interests of individuals registered but does allow the development of research projects |
|------------------|-----------------------------------------------|------|------------------------------------|------------------------|----|----|-----------------------------------------------------------------------------------------------------------------------|----|-------------------------------------------------------------------------------------------------------------------------------------------------|----|----------------------------------------|----|----------------------------------------------------------------------------------------------------------------------------------------------------------------------------------------------------------------------------------------------------|---------------------------------------------------------------------------------------------------------------------------------------------------------------------------------------------------------------------------------------------------------------------|--------------------------------------------------------------------------------------------------------------------------------------------------------------------------|----|--------------------------------------------------------------------------------------------------------------------------------------------------------------------------------------------------------------------------------------------------------|-----------------------------------------------------------------------------------------------------------------------------------------------------------------------------------------------------------------------------------------------------------------------------------------------------------------------------|-------------------------------------------------------------------------------------------------------------------------------------------------------------------------------------------------------------------------------------------------------------------------|---------------------------------------------------------------------------------------------------------------------------------------------------------------------------------------------------------------------------------------------------------------------------------------------------------------------------------------------------------------------------------------------------------------------------------------------------------------------------------------------------------------------------------------------------------------------------------------------------------------------------------------------------------------------------------------------------------------------------------------------------------------------------------------------------------------------------------------------------------------------------------------------------------------------------------------------------------------------------------------------------------------------------------------------------------------------------------------------------------------------------|

For peer review only



1  
2  
3  
4  
5  
6  
7  
8  
9  
10  
11  
12  
13  
14  
15  
16  
17  
18  
19  
20  
21<sup>3</sup>  
22  
23  
24  
25  
26  
27  
28  
29  
30  
31  
32  
33  
34  
35<sup>4</sup>  
36  
37  
38  
39  
40  
41  
42  
43  
44  
45  
46  
47  
48  
49

For peer review only

a reliance on the discharge process may itself be a weakness as there is an inevitable error rate within these documents. There is a risk of reporting bias and gaming when clinicians report their own outcomes - for example, adverse events become 'missing data'. To reduce this risk a possible solution is to have a unique patient identifier that follows the patient throughout the healthcare pathway so no events are missed. Data should be collected from a clearly defined point of care eg point of intervention - This single approach will help attain accurate clinical and administrative performance

|                      |                                                                                                                                                           |      |                                                                                        |                                |                                                     |                                                     |                                                                                                                                                                         |                                                                                                                                                                                                                                 |       |                                                                                                                                                                                                              |                                                                                                                                                             |                                                                                                                                                                        |                                                                                                                                                                   |                                                                                                                                                                      |                                                    |                                                                                                                                              |                                                                                                                                                                                                                                                    |                                                                                                                                                                                                                                                                                                                                                                                                                                                                                                                                                                                                                                                  |    |                                                                               |
|----------------------|-----------------------------------------------------------------------------------------------------------------------------------------------------------|------|----------------------------------------------------------------------------------------|--------------------------------|-----------------------------------------------------|-----------------------------------------------------|-------------------------------------------------------------------------------------------------------------------------------------------------------------------------|---------------------------------------------------------------------------------------------------------------------------------------------------------------------------------------------------------------------------------|-------|--------------------------------------------------------------------------------------------------------------------------------------------------------------------------------------------------------------|-------------------------------------------------------------------------------------------------------------------------------------------------------------|------------------------------------------------------------------------------------------------------------------------------------------------------------------------|-------------------------------------------------------------------------------------------------------------------------------------------------------------------|----------------------------------------------------------------------------------------------------------------------------------------------------------------------|----------------------------------------------------|----------------------------------------------------------------------------------------------------------------------------------------------|----------------------------------------------------------------------------------------------------------------------------------------------------------------------------------------------------------------------------------------------------|--------------------------------------------------------------------------------------------------------------------------------------------------------------------------------------------------------------------------------------------------------------------------------------------------------------------------------------------------------------------------------------------------------------------------------------------------------------------------------------------------------------------------------------------------------------------------------------------------------------------------------------------------|----|-------------------------------------------------------------------------------|
| Briggs V<br>Wilkie M | Chapter 14 Comparative audit of peritoneal dialysis catheter placement in England, Northern Ireland and Wales in 2011: a summary of progress to July 2012 | 2012 | Audit of Peritoneal Dialysis Catheter Placement in England, Northern Ireland and Wales | PD Dialysis Catheter placement | York and Humber Renal Network and UK Renal Registry | York and Humber Renal Network and UK Renal Registry | The ultimate aim of the project is to develop an effective national PD access audit which will identify what represents an appropriate standard of PD catheter function | A 2009 Renal Association working party recommended that the UK Renal Registry should collect centre specific information on various PD access outcome measures including catheter functionality and post-insertion complication | HQUIP | The principal data fields have been refined following a pilot audit of six centres in Y & H and discussed extensively through the Y & H PD audit group and the Dialysis Study Group of the UK Renal Registry | Demographics, date of first dialysis, date of surgical assessment, peritoneal dialysis catheter insertion procedure details, diabetes status, complications | The brief permitted a spreadsheet based data collection process for the first year, with subsequent data collection through the Renal Registry's electronic processes. | It was realised that there was a need to minimise the data to strengthen data completeness including clinically relevant data and objective reproducible measures | Forty three data collection spreadsheets were returned from a total of 63 centres describing 863 PD catheter placements of which 225 had a missing date of insertion | Electronic reports via the Renal registry website. | Patient and public partnership were engaged at several levels including as part of the audit steering group and UK Renal Registry Committee. | Data completeness                                                                                                                                                                                                                                  | NS                                                                                                                                                                                                                                                                                                                                                                                                                                                                                                                                                                                                                                               | NS | Data protection and patient confidentiality held within the UK Renal Registry |
| Mitchell D<br>Lees T | The benefits of comparative audit in vascular surgery.                                                                                                    | 2011 | This is a commentary on the benefits of comparative audit in Vascular Surgery          | Vascular Surgery               | NS                                                  | NS                                                  | NS                                                                                                                                                                      | NS                                                                                                                                                                                                                              | NS    | NS                                                                                                                                                                                                           | NS                                                                                                                                                          | NS                                                                                                                                                                     | NS                                                                                                                                                                | NS                                                                                                                                                                   | NS                                                 | NS                                                                                                                                           | There is evidence from examination of national statistics that registry data contains bias due to under-reporting of adverse outcomes. The majority of national audits are collected by clinicians on a voluntary basis. This lends itself to bias | The 2008 Vascular report showed that the UK was an outlier with excess mortality (7.8%) following open surgical repair of abdominal aortic aneurysm. The effect was immediate, with expressions of disbelief from UK vascular surgeons. This was despite other publications showing similar mortality rates around that time. Had this international comparison not been done the UK vascular surgeons may well not have picked up on this being a problem. The consequence of this knowledge was the development of a quality improvement framework (QIP) by the Vascular Society of Great Britain & Ireland (VSCBI) setting a target to reduce | NS | NS                                                                            |

mortality to 3.5% by 2013. Since this time, mortality rates have improved. Vasconet and the Vascular Society believe that international comparative audit has been good for UK vascular surgeons. It has dispelled fixed attitudes about the quality of care we provide, and we are beginning to show improvement. This will have benefits for our patients, not just in terms of outcome, but also in the change to our processes, increasing patient communication and ensuring that patients are brought to optimal fitness prior to intervention

|                                                                                                |                                                                    |      |                                                                  |                                      |    |    |                                                                                                                                                                    |    |    |    |                                                                                                                      |                                                                                                                                               |                                                                                                                                                                   |                                                                                                           |    |    |                                                                                                                                                                                                                        |    |    |                                                |
|------------------------------------------------------------------------------------------------|--------------------------------------------------------------------|------|------------------------------------------------------------------|--------------------------------------|----|----|--------------------------------------------------------------------------------------------------------------------------------------------------------------------|----|----|----|----------------------------------------------------------------------------------------------------------------------|-----------------------------------------------------------------------------------------------------------------------------------------------|-------------------------------------------------------------------------------------------------------------------------------------------------------------------|-----------------------------------------------------------------------------------------------------------|----|----|------------------------------------------------------------------------------------------------------------------------------------------------------------------------------------------------------------------------|----|----|------------------------------------------------|
| Mason R.<br>Foley N.<br>Branley H.<br>Maher T.<br>Hetzal M.<br>Adamali H.<br>Suntharalingam J. | Pulmonary Langerhans' cell histiocytosis (PLCH): A new UK register | 2012 | National Pulmonary Langerhans cell histiocytosis (PLCH) Register | Management of PLCH including surgery | NS | NS | This is a research letter describing the registry. The aim of the registry was to characterise the UK population suffering from PLCH and to enable future research | NS | NS | NS | Demographics, symptoms, smoking history, lung function, surgical biopsy results, treatment including lung transplant | Demographic and clinical data were collected by post, from individual patients, their respiratory clinicians and their general practitioners. | Advertisements in the eBritish Thoracic Society (BTS) bulletin, at BTS meetings, the BTS BOLD conference and by contacting all UK interstitial lung disease leads | One hundred and six patients (17 deceased, 8 lost to follow-up) were initially identified from 53 centres | NS | NS | Patients joined the register voluntarily, potentially introducing selection and referral bias. Missing data from deceased patients or those lost to follow-up may also have introduced survivorship and selection bias | NS | NS | Consent taken from all patients that gave data |
|------------------------------------------------------------------------------------------------|--------------------------------------------------------------------|------|------------------------------------------------------------------|--------------------------------------|----|----|--------------------------------------------------------------------------------------------------------------------------------------------------------------------|----|----|----|----------------------------------------------------------------------------------------------------------------------|-----------------------------------------------------------------------------------------------------------------------------------------------|-------------------------------------------------------------------------------------------------------------------------------------------------------------------|-----------------------------------------------------------------------------------------------------------|----|----|------------------------------------------------------------------------------------------------------------------------------------------------------------------------------------------------------------------------|----|----|------------------------------------------------|

|                                                                  |                                        |      |                                        |                |    |                    |                                                                                                                                                                                                                   |                                                                                                                                                                                                                                                                                                                                                                                                                                         |                                                                                                                                                                                                                                                                               |                                                                                                                                                                                                 |                                                                                                                                                                                                             |    |                                                                                                                                                                                                                                                                                                                                                                                                                                                                                                                         |    |    |                                                                                                                                                                                                                                       |                                                                   |                                                                                                                                                                                                                                                                                                                                                                                                                                                                     |    |    |
|------------------------------------------------------------------|----------------------------------------|------|----------------------------------------|----------------|----|--------------------|-------------------------------------------------------------------------------------------------------------------------------------------------------------------------------------------------------------------|-----------------------------------------------------------------------------------------------------------------------------------------------------------------------------------------------------------------------------------------------------------------------------------------------------------------------------------------------------------------------------------------------------------------------------------------|-------------------------------------------------------------------------------------------------------------------------------------------------------------------------------------------------------------------------------------------------------------------------------|-------------------------------------------------------------------------------------------------------------------------------------------------------------------------------------------------|-------------------------------------------------------------------------------------------------------------------------------------------------------------------------------------------------------------|----|-------------------------------------------------------------------------------------------------------------------------------------------------------------------------------------------------------------------------------------------------------------------------------------------------------------------------------------------------------------------------------------------------------------------------------------------------------------------------------------------------------------------------|----|----|---------------------------------------------------------------------------------------------------------------------------------------------------------------------------------------------------------------------------------------|-------------------------------------------------------------------|---------------------------------------------------------------------------------------------------------------------------------------------------------------------------------------------------------------------------------------------------------------------------------------------------------------------------------------------------------------------------------------------------------------------------------------------------------------------|----|----|
| Elson D.W.<br>Dawson M.<br>Wilson C.<br>Risebury M.<br>Wilson A. | The UK Knee Osteotomy Registry (UKKOR) | 2015 | The UK Knee Osteotomy Registry (UKKOR) | Knee Osteotomy | NS | Steering committee | Aim of the registry is to improve the quality of patient care by monitoring outcomes. Specific goals: Define patient selection criteria, identify the devices and surgical techniques which give the best results | Electronic/web-based registries have a distinct advantage in terms of staffing requirements and costs of paper based registries. UKKOR has been established by surgeons, independent of government agencies. Amplitude data platform (hosted by Bluespier) has been selected. The steering group deliberately approached several industry stakeholders in order to maintain a neutral bias towards any one company or commercial party. | Funding received from five companies with a stake in osteotomy surgery. Sponsoring companies will have access to performance data on their own products but not their competitors. In addition BASK have been supportive of the project and provided a generous priming grant | The inclusion of patient reported outcome measures is vital to increase any registries' sensitivity to define success. UKKOR has chosen to follow the same model employed by the NLR committee. | Demographics, patient co-morbidities, oxford knee score (OKS), the knee injury and osteoarthritis outcome score (KOOS), EuroQol (EQ5D) Activity participation questionnaire (OKS-APQ) from the Oxford group | NS | Clinicians can recognise that the registry will be useful as a governance instrument providing information for appraisal and revalidation. To increase compliance from both patients and clinicians, the registry has a visually appealing website which is informative and engaging with the inclusion of video explanations. All future publications drawing conclusions from UKKOR data will be authored by the "UKKOR research collaborative." Thus all surgeons who contribute patients and data will be listed as | NS | NS | Patients will be persuaded to participate because they can see their charted progress after surgery. Patients tend to have email address and phone number and this information is critical to facilitate automated patient follow-up. | Compliance from both patients and surgeons is a potential concern | Clinical registries use observational study methods from a broad population base and so their findings have strong external validity. The larger sample size from a registry database allows analysis of the multiple variables which can influence outcome. In addition, a prospective collection of complications (perceived by both patient as well as surgeon) offers transparency which should enlighten the consent process and improve patient understanding | NS | NS |
|------------------------------------------------------------------|----------------------------------------|------|----------------------------------------|----------------|----|--------------------|-------------------------------------------------------------------------------------------------------------------------------------------------------------------------------------------------------------------|-----------------------------------------------------------------------------------------------------------------------------------------------------------------------------------------------------------------------------------------------------------------------------------------------------------------------------------------------------------------------------------------------------------------------------------------|-------------------------------------------------------------------------------------------------------------------------------------------------------------------------------------------------------------------------------------------------------------------------------|-------------------------------------------------------------------------------------------------------------------------------------------------------------------------------------------------|-------------------------------------------------------------------------------------------------------------------------------------------------------------------------------------------------------------|----|-------------------------------------------------------------------------------------------------------------------------------------------------------------------------------------------------------------------------------------------------------------------------------------------------------------------------------------------------------------------------------------------------------------------------------------------------------------------------------------------------------------------------|----|----|---------------------------------------------------------------------------------------------------------------------------------------------------------------------------------------------------------------------------------------|-------------------------------------------------------------------|---------------------------------------------------------------------------------------------------------------------------------------------------------------------------------------------------------------------------------------------------------------------------------------------------------------------------------------------------------------------------------------------------------------------------------------------------------------------|----|----|

contributing authors on future PubMed citable manuscripts

1  
2  
3  
4  
5  
6  
7  
8  
9  
10  
11  
12  
13  
14  
15  
16  
17  
18  
19  
20  
21  
22  
23  
24  
25  
26  
27  
28  
29  
30  
31  
32  
33  
34  
35  
36  
37  
38  
39  
40  
41  
42  
43  
44  
45  
46  
47  
48  
49

|                                                                            |                                                                                                                                           |      |                                                                                                                                                             |                                                |                                                                                                                                                                     |                                                                                                                                                                                                                                                                                                                                                                                                                                                                                                                                                                                                                                                             |                                                                                                                                                                                                                                                                                                                                                                                                                                                    |                                                                                                                                                                                                                                                                                                                                                                                                                                                                                                                                                                                                                                                                                                                                                                                                                                                                                                          |                                                                                                                                                                                                                                                                                                                                                                                                                                                      |                                                                                                                                                     |                                                                                                                                                                                                                                                                                                                                                                                      |                                                                                                                                                                                                                                                                                                                                                                                                                                                                                                                                                                                                                                                                                                                                                                                                                                 |                                                                                                                                                                                                                                                                                                                                                                                                                                                                                                                                                                                                                                                                                                                                                                                                                                     |                                                                                                                                                                                                                                                   |                                                                                                                                                                                                                                      |                                                                                                                                                                                                                                                                                                                                                                                                                                                                                                                                                                                                                                                                 |    |                                                                                                                                                                                                                                                                                                                                                                                                                                                                  |                                                                                                                                                                 |                                                                                                                                                                                                                                                                                                                                                                                                                  |
|----------------------------------------------------------------------------|-------------------------------------------------------------------------------------------------------------------------------------------|------|-------------------------------------------------------------------------------------------------------------------------------------------------------------|------------------------------------------------|---------------------------------------------------------------------------------------------------------------------------------------------------------------------|-------------------------------------------------------------------------------------------------------------------------------------------------------------------------------------------------------------------------------------------------------------------------------------------------------------------------------------------------------------------------------------------------------------------------------------------------------------------------------------------------------------------------------------------------------------------------------------------------------------------------------------------------------------|----------------------------------------------------------------------------------------------------------------------------------------------------------------------------------------------------------------------------------------------------------------------------------------------------------------------------------------------------------------------------------------------------------------------------------------------------|----------------------------------------------------------------------------------------------------------------------------------------------------------------------------------------------------------------------------------------------------------------------------------------------------------------------------------------------------------------------------------------------------------------------------------------------------------------------------------------------------------------------------------------------------------------------------------------------------------------------------------------------------------------------------------------------------------------------------------------------------------------------------------------------------------------------------------------------------------------------------------------------------------|------------------------------------------------------------------------------------------------------------------------------------------------------------------------------------------------------------------------------------------------------------------------------------------------------------------------------------------------------------------------------------------------------------------------------------------------------|-----------------------------------------------------------------------------------------------------------------------------------------------------|--------------------------------------------------------------------------------------------------------------------------------------------------------------------------------------------------------------------------------------------------------------------------------------------------------------------------------------------------------------------------------------|---------------------------------------------------------------------------------------------------------------------------------------------------------------------------------------------------------------------------------------------------------------------------------------------------------------------------------------------------------------------------------------------------------------------------------------------------------------------------------------------------------------------------------------------------------------------------------------------------------------------------------------------------------------------------------------------------------------------------------------------------------------------------------------------------------------------------------|-------------------------------------------------------------------------------------------------------------------------------------------------------------------------------------------------------------------------------------------------------------------------------------------------------------------------------------------------------------------------------------------------------------------------------------------------------------------------------------------------------------------------------------------------------------------------------------------------------------------------------------------------------------------------------------------------------------------------------------------------------------------------------------------------------------------------------------|---------------------------------------------------------------------------------------------------------------------------------------------------------------------------------------------------------------------------------------------------|--------------------------------------------------------------------------------------------------------------------------------------------------------------------------------------------------------------------------------------|-----------------------------------------------------------------------------------------------------------------------------------------------------------------------------------------------------------------------------------------------------------------------------------------------------------------------------------------------------------------------------------------------------------------------------------------------------------------------------------------------------------------------------------------------------------------------------------------------------------------------------------------------------------------|----|------------------------------------------------------------------------------------------------------------------------------------------------------------------------------------------------------------------------------------------------------------------------------------------------------------------------------------------------------------------------------------------------------------------------------------------------------------------|-----------------------------------------------------------------------------------------------------------------------------------------------------------------|------------------------------------------------------------------------------------------------------------------------------------------------------------------------------------------------------------------------------------------------------------------------------------------------------------------------------------------------------------------------------------------------------------------|
| Van Gijn W.<br>Wouters M.W.J.M.<br>Peeters K.C.M.J.<br>Van De Velde C.J.H. | Nationwide outcome registrations to improve quality of care in rectal surgery. An initiative of the European Society of Surgical Oncology | 2009 | This papers provides an overview of a number of european audits. We have collected data on UK audit(s) only: National Bowel Cancer Audit Programme (NBOCAP) | Colorectal cancer treatment including surgery. | NS                                                                                                                                                                  | The Association of Coloproctology of Great Britain and Ireland (ACPGBI)                                                                                                                                                                                                                                                                                                                                                                                                                                                                                                                                                                                     | This paper provides an overview of the current European audit initiatives on rectal cancer and reflect on data- collection, outcome analysis and the results reported in the literature. We have collected data on UK audits only and general lessons learnt. The NBOCAP aims to improve outcomes from bowel cancer in the UK by promoting a careful and comprehensive collection of information on all patients who suffer from colorectal cancer | NS                                                                                                                                                                                                                                                                                                                                                                                                                                                                                                                                                                                                                                                                                                                                                                                                                                                                                                       | NS                                                                                                                                                                                                                                                                                                                                                                                                                                                   | NS                                                                                                                                                  | Length of stay, mortality                                                                                                                                                                                                                                                                                                                                                            | Feedback to participating hospitals should become an important feature to improve quality of care. An important condition for the success of outcome registries is the quality of the collected data. Data have to be prospective, complete, case-mix adjusted and preferably collected by independent investigators. In addition, the quality of the data has to be assured by a second independent registry                                                                                                                                                                                                                                                                                                                                                                                                                   | NS                                                                                                                                                                                                                                                                                                                                                                                                                                                                                                                                                                                                                                                                                                                                                                                                                                  | 17% of all Trusts in England and Wales submitted complete data in 2007. There is not yet enough coverage to allow solid feedback. However, it is enough to create risk-adjusted models required to give a fair comparative feedback in the future | Annual reports                                                                                                                                                                                                                       | NS                                                                                                                                                                                                                                                                                                                                                                                                                                                                                                                                                                                                                                                              | NS | The existence of an audit improves performance (Howthorne effect). The feedback of reliable data on individual performance of hospitals and/or surgeons catalyses quality improvements. Apart from a professional impetus to improve quality of care, there is a public demand for health care providers to justify the costs as well as the quality of the health care they deliver. Registries help provide this information                                   | A high level of confidence in the validity of the data among the participants, is one of the most important factors determining the success of a surgical audit | NS                                                                                                                                                                                                                                                                                                                                                                                                               |
| NELA Project Team                                                          | National Emergency Laparotomy Audit (NELA) Protocol                                                                                       | 2014 | NELA. This paper discussed the protocol for NELA                                                                                                            | Emergency laparotomy                           | Royal College of Anaesthetists, the Clinical Effectiveness Unit of the Royal College of Surgeons of England and the Intensive Care National Audit & Research Centre | Royal college of anaesthetists. NELA will be delivered by a central Project Team from the National Institute of Academic Anaesthesia's Health Services Research Centre based at the RCoA. Formal oversight will be provided by a Project Board consisting of key stakeholders. Scientific input will be provided by a Clinical Reference Group consisting of representatives from all relevant clinical professionals and speciality stakeholders (including patient groups). The Project Board members are the decision makers and responsible for the commitment of resources to the project, such as personnel, funding and equipment. The Project Board | To enable the improvement of the quality of care for patients undergoing emergency laparotomy through the provision of high quality comparative data from all providers of emergency laparotomy                                                                                                                                                                                                                                                    | Online Web tool. In Year 1 an Organisational Audit was performed, with individual patient data collection in Years 2 and 3. NELA data will be linked to other sources of routine data including Critical Care Data (Intensive Care National Audit and Research Centre (ICNARC) case mix programme), Bowel Cancer Data (National Bowel Cancer Audit/Upper Gastro- intestinal Cancer Audit) and Hospital Episode Statistics (mortality data). The NELA has a Clinical reference group (CRG). The CRG is made up of relevant clinical professionals and speciality stakeholders and has direct input into the design and conduct of the audit. Senior representative(s) from the CRG sit on the Project Board as Senior User(s). The CRG consists of representatives from partner organisations as well as other stakeholders including patients. The CRG acts in an advisory capacity to the Project Team. | Funding from HQIP. NELA was one of the top two national clinical audits funded, in response to HQIP's call for new national audit topic proposals in 2011. It was commissioned following evidence of a high incidence of death, and a wide variation in the provision of care and mortality, for patients undergoing emergency laparotomy in hospitals across England and Wales. Funded for 3 years with the potential of a further 2 year extension | During the course of the audit, the team will explore the potential for patient reported measures to be included in the Programme when appropriate. | Patient demographics, mortality, length of stay, time of admission, type of operation, time when consultant surgeon reviewed patient, time of operation, time of antibiotics, input by consultant during the operation, seniority of individual performing operation, seniority of CT scan reporting, time to access of theatres, operative urgency, critical care admission post op | Each NELA participant taking part is given a login, which enables the user to access and contribute data. The NELA Project Team is made up of methodologists, statisticians, Quality Improvement specialists and clinical fellows who will be analysing the patient data. The data will be analysed alongside the surgical and anaesthetic standards currently in place so as to see how many of them are being met and in what percentage of participating sites. The Project Team will also be linking Year 1 data with figures from the Office of National Statistics (ONS) and Hospital Episode Statistics (HES). By doing so they will be able to examine how many patients who underwent emergency laparotomy and were included in the audit were readmitted to hospital at a later date and how many of the patient died | Increase engagement by enabling participating sites to constantly review and analyse their hospital's results and improve the quality of patient care. Participating centres can use the web tool's Export function and transfer their patient results onto an excel spreadsheet. The Project Team is in the process of developing a QI 'dashboard' for the NELA online web tool. The dashboard will feed back patient information to users in real time allowing them to examine the demographics of patients undergoing emergency laparotomy at their site while also looking at how often key surgical QI targets are being met. In October 2014 the Project Team published the Organisational Audit Action Plan, a form which provides a plan to assist sites in ensuring they are meeting the recommendation s laid out in the | The first year of the Patient Audit saw over 20,500 patient cases entered with 100% of the 191 of the participating hospitals contributing patient data                                                                                           | Publication of reports on website - available to public. Reports sent to participating trusts chief executives shortly before publication and other stakeholders. Report findings communicated at regional and national conferences. | Patient act a stakeholders and formed part of the CRG which was tasked with audit development and running. While NELA does not require a patient's consent to be included in the audit, it is important to the Project Team that patients are aware of their inclusion in NELA and that it works closely with patient liaison groups. For this reason a patient representative is present on both the Project Board and the Clinical Reference Group and the audit's website features a page designed to educate patients on what NELA is and how the audit is being conducted. The NELA website has a section of FAQs for frequent questions asked by patients | NS | NELA enables participants to examine their hospitals results while also seeing how they compare to the audit-wide average formed by the rest of their fellow participants. Enables secondary care providers to improve the delivery of care to patients undergoing emergency laparotomy using information produced by the audit. Facilitates the development of effective change (quality improvement) initiatives and thereby spread examples of best practice. | NS                                                                                                                                                              | Due to the fact that patient identifiable information (such as patient name, DOB, NHS number, etc.) is visible on the web tool a new user requires a trust or NHS email address in order to be registered. Additionally, the web tool has been designed so as to not allow members of the Project Team access to sensitive information when logged in, with all patient identifiable data having been anonymised |

oversees strategic direction and is responsible for monitoring all aspects of delivery of the project, and is accountable to the stakeholder organisations. The Project Board meets 6-monthly and receives direct reports on the delivery of the project from members of the Project Team leaders (Chair, Clinical Lead and Methodologist) as well as minutes from the Clinical Reference Group. The Executive is ultimately accountable for the project, supported by the Senior User and Senior Supplier (HQ/P) - Senior Supplier (responsible for providing the goods or services) - will be ultimately accountable for delivery of the project. The Senior User (responsible for defining what is required from the project) - commits user resources to the project. The NELA Project Team is responsible for the ongoing delivery of the Project. Project Chair - Overall responsibility for delivery of the project. Clinical Lead - Responsible for liaison with the Clinical Reference Group members, liaison with NHS emergency laparotomy network, providing clinical advice during analysis, dissemination of audit results and working on quality improvement initiatives. Project Manager - Responsible for day to day management of the project

providing speciality specific advice, and lay advice as appropriate. The CRG reviews all audit design regularly and also reviews drafts of any reports and recommendations issued. CRG consisted of: Trsu management representative, RCS, royal college of radiologists, Royal College of nursing, royal college of anaesthetists, quality observatores, patient representatives from anaesthesia, surgery and the elderly, NHS emergency laparotomy network, Intensive care society, British geriatric society, ASGBI, AAGBI, association of peroperative practice, age anaesthesia association.

within 30 or 60 days of their initial procedure.

NELA Organisational Report and if not, what actions need to be taken to achieve these aims

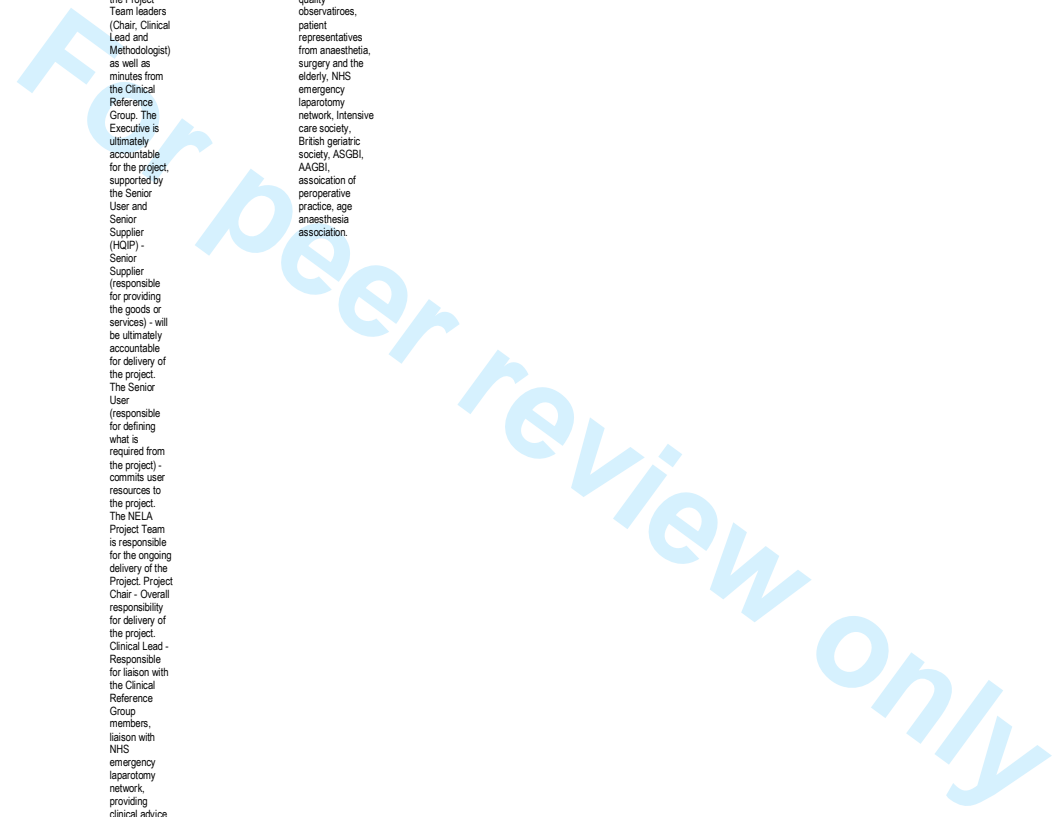



1  
2  
3  
4  
5  
6  
7  
8  
9  
10  
11  
12  
13  
14  
15  
16  
17  
18  
19  
20  
21  
22  
23  
24  
25  
26  
27  
28  
29  
30  
31  
32  
33  
34  
35  
36  
37  
38  
39  
40  
41  
42  
43  
44  
45  
46  
47  
48  
49

|                                                    |                                                                                              |            |      |               |                                                                                                                                                                                |                                                                                                                                                                                                                                                                                                                                                                                                                                                                                                                                                                                                                                                                                                                |                                                                                                                                                            |                                                                                                                                                                                                                                                                                                                                                                                                                                                                                                                                                                                                                                                                                                                                                                                                                                                                                                                                                                                                                                                                                                                                                                                                                                                                                                                                                                                                                                           |                                                                                                                                                                                                                                                                                                                                                                                                                                                                                                                                                                                                                                                                                                                                                                                                                                     |                                                                       |                                                                                                                                                                                                                                                                                                                                                                                                                                                                                                                                                                                                                                           |                                                                                                                                                                                                                                                                                                                                                                                                                                                                                                                                                                                                                                                                                                                                                                                                                                                                                                                                                                                                            |                                                                                                                                                                                                                                                                                                                                                                                                                                                                                                                                                                                                                                                                                                                                                                                                                                                                                                                                                                                                                                                                                                                                                                                                                                                            |                                                                                                                                                                                                                                                                                    |                                                                                                                                                                                                                                                                                                                                                                                                                                                                                                                                                                                                                                                                                                                                                                                                                                                                                                        |                                                                                                          |                                                                                                                                                                                                                                                                                                                                                                                                                                                                                                                                                                                                                                                     |                                                                                                                                                                                                                                                                                                                                                                                                                                                                                                                                                                                                                                                                                                                                                                                                                                                                                                                                                                                                                                   |                                                                                                 |                                                                                                                                                                                                                                                                                                                                                                                                                                                                                                                                                                                                                                                                                                                                                                                                                                                                                                                                                                                                                                                                                                                                 |
|----------------------------------------------------|----------------------------------------------------------------------------------------------|------------|------|---------------|--------------------------------------------------------------------------------------------------------------------------------------------------------------------------------|----------------------------------------------------------------------------------------------------------------------------------------------------------------------------------------------------------------------------------------------------------------------------------------------------------------------------------------------------------------------------------------------------------------------------------------------------------------------------------------------------------------------------------------------------------------------------------------------------------------------------------------------------------------------------------------------------------------|------------------------------------------------------------------------------------------------------------------------------------------------------------|-------------------------------------------------------------------------------------------------------------------------------------------------------------------------------------------------------------------------------------------------------------------------------------------------------------------------------------------------------------------------------------------------------------------------------------------------------------------------------------------------------------------------------------------------------------------------------------------------------------------------------------------------------------------------------------------------------------------------------------------------------------------------------------------------------------------------------------------------------------------------------------------------------------------------------------------------------------------------------------------------------------------------------------------------------------------------------------------------------------------------------------------------------------------------------------------------------------------------------------------------------------------------------------------------------------------------------------------------------------------------------------------------------------------------------------------|-------------------------------------------------------------------------------------------------------------------------------------------------------------------------------------------------------------------------------------------------------------------------------------------------------------------------------------------------------------------------------------------------------------------------------------------------------------------------------------------------------------------------------------------------------------------------------------------------------------------------------------------------------------------------------------------------------------------------------------------------------------------------------------------------------------------------------------|-----------------------------------------------------------------------|-------------------------------------------------------------------------------------------------------------------------------------------------------------------------------------------------------------------------------------------------------------------------------------------------------------------------------------------------------------------------------------------------------------------------------------------------------------------------------------------------------------------------------------------------------------------------------------------------------------------------------------------|------------------------------------------------------------------------------------------------------------------------------------------------------------------------------------------------------------------------------------------------------------------------------------------------------------------------------------------------------------------------------------------------------------------------------------------------------------------------------------------------------------------------------------------------------------------------------------------------------------------------------------------------------------------------------------------------------------------------------------------------------------------------------------------------------------------------------------------------------------------------------------------------------------------------------------------------------------------------------------------------------------|------------------------------------------------------------------------------------------------------------------------------------------------------------------------------------------------------------------------------------------------------------------------------------------------------------------------------------------------------------------------------------------------------------------------------------------------------------------------------------------------------------------------------------------------------------------------------------------------------------------------------------------------------------------------------------------------------------------------------------------------------------------------------------------------------------------------------------------------------------------------------------------------------------------------------------------------------------------------------------------------------------------------------------------------------------------------------------------------------------------------------------------------------------------------------------------------------------------------------------------------------------|------------------------------------------------------------------------------------------------------------------------------------------------------------------------------------------------------------------------------------------------------------------------------------|--------------------------------------------------------------------------------------------------------------------------------------------------------------------------------------------------------------------------------------------------------------------------------------------------------------------------------------------------------------------------------------------------------------------------------------------------------------------------------------------------------------------------------------------------------------------------------------------------------------------------------------------------------------------------------------------------------------------------------------------------------------------------------------------------------------------------------------------------------------------------------------------------------|----------------------------------------------------------------------------------------------------------|-----------------------------------------------------------------------------------------------------------------------------------------------------------------------------------------------------------------------------------------------------------------------------------------------------------------------------------------------------------------------------------------------------------------------------------------------------------------------------------------------------------------------------------------------------------------------------------------------------------------------------------------------------|-----------------------------------------------------------------------------------------------------------------------------------------------------------------------------------------------------------------------------------------------------------------------------------------------------------------------------------------------------------------------------------------------------------------------------------------------------------------------------------------------------------------------------------------------------------------------------------------------------------------------------------------------------------------------------------------------------------------------------------------------------------------------------------------------------------------------------------------------------------------------------------------------------------------------------------------------------------------------------------------------------------------------------------|-------------------------------------------------------------------------------------------------|---------------------------------------------------------------------------------------------------------------------------------------------------------------------------------------------------------------------------------------------------------------------------------------------------------------------------------------------------------------------------------------------------------------------------------------------------------------------------------------------------------------------------------------------------------------------------------------------------------------------------------------------------------------------------------------------------------------------------------------------------------------------------------------------------------------------------------------------------------------------------------------------------------------------------------------------------------------------------------------------------------------------------------------------------------------------------------------------------------------------------------|
| National Hip Fracture Registry 2015, annual report | National Hip Fracture Registry 2015, annual report and NHFD Preliminary National Report 2009 | 2015, 2009 | NHFD | Hip fractures | Royal College of Physicians (RCP), British Orthopaedic Association, British Geriatrics Society, RCS, Age UK, National Osteoporosis Society, Falls and Fractures Alliance, HQIP | NHFD is run by an Executive representing the core clinical specialities, and also includes representation from a patient group. A larger and more broadly-based Steering Group provides advice, and a smaller Implementation Group, deals with project development, data analysis, and the generation of reports. A data set subgroup is responsible for the monitoring and further development of the NHFD standard data set. The NHFD is managed by the Clinical Effectiveness and Evaluation Unit (CEEU) of the Royal College of Physicians (RCP) as part of the Falls and Fragility Fracture Audit Programme (FFFAP) alongside the Fracture Liaison Service Database (FLS-DB) and Falls Pathway workstream | To improve the delivery of care for patients having falls or sustaining fractures through effective measurement against standards and feedback to provider | The National Hip Fracture Database was set up as a collaborative venture by the British Orthopaedic Association and the British Geriatrics Society in 2007. Work towards the establishment of NHFD started in 2004, with a series of meetings by clinicians mainly from the British Orthopaedic Association and the British Geriatrics Society. These team members examined the experience of existing hip fracture audits with a view to building a preliminary national database and establishing a nationally agreed dataset. By 2007 - with the support of the NHS Information Centre, and learning from the highly successful Myocardial Infarction National Audit Project (MINAP) - NHFD was able to provide participating trauma services with a comprehensive national audit that could help them monitor and improve their care. In parallel was the development of the Blue Book - a multi-disciplinary authorship group that included anaesthetic, orthogeriatric, general practice, nursing, orthopaedic and pharmacological expertise that reviewed the current evidence on fragility fracture care and produced a concise and practical 75-page handbook. Crown Informatics is the web provider and this has enabled the development of a more interactive, user-friendly website. Website is continuously being upgraded to provide graphical 'real-time' information to support the monthly clinical governance meetings. | The development of NHFD since 2004 has depended upon the support of the British Orthopaedic Association (BOA), the British Geriatrics Society (BGS) and other relevant professional groups; and on generous funding from the Association of the British Pharmaceutical Industry (ABPI) and Association of Healthcare Industries (ABHI), the professional bodies of the pharmaceutical and devices industries respectively. A substantial grant was obtained from the Department of Health. Total income for 2007/2008 was £519,605 with a total expenditure for the same period of £458,188. Following the set up of the registry, ongoing funding has been from HQIP. The cost of reliable data collection is estimated at around £50-60 per case - this cost should be seen in relation to the overall cost of hip fracture care. | Data was collected to allow easy comparison to NICE recommendation s. | Patient demographics, place of residence, ASA, length of stay, admission via A&E, length of NHS care following hip fracture (including care in the community), whether fracture occurred when patient was an inpatient, type of surgery, type of implant, type of fracture, re-operation, pressure ulcers, mortality, time to an orthopaedic ward, time to surgery, type of anaesthetic, complications, morbidity, perioperative medical assessment, AMTS documentation, received falls assessment, mobilised out of bed 1 day post op, received bone health assessment, whether the record has met all criteria for best practice tariff | Many hospitals participating in the NHFD do not actively follow up their patients after discharge, so to calculate 30-day mortality NHFD relies on validated, third-party mortality data from the Office for National Statistics (ONS). They then use a case-mix adjustment model to ensure that mortality figures are appropriate to the demographics of the local patient population. LOS is analysed with an annualised line that smooths out seasonal variation. The registry has a Best Practice Tariff run chart that allows hospitals to see what proportion of their patients are receiving key elements of best clinical care and overall BPT attainment. The NHFD only excludes patients from analyses that prove impossible due to specific deficiencies in their dataset, but still include them in any other analyses for which relevant dataset fields are complete. Data quality issues can be addressed by well-funded data collection, and by the use of data quality checking mechanisms | Use of web-based technology facilitates information transfer, data handling, analysis and feedback, and advice and user support. Regular feedback to participating units helps maintain interest and increase participation in the registry. During the NHFD launch, advertisement via press coverage, presentations at relevant national meetings, and word of mouth ensured that the rate of participation was rapid. NHFD has established online graphs that provide individual hospital teams with live data on performance, time to theatre, mortality, length of stay (LOS), best practice and patient safety. Such charts are key to monthly clinical governance for hip fracture programmes and are therefore very useful for clinicians and hospitals. Easy to use website. NHFD provides user support and has a downloadable toolkit. Published reports are a useful method of increasing 'buy-in' - they provide a permanent record of progress, and can serve to raise the profile of NHFD and bring it to the notice of non-participating units, commissioners of hip fracture care, relevant professional bodies, and strategic health authorities. NHFD will enable the collection of data required to enable the commissioning of services | When the registry first started, there were concerns about both the completeness and the quality of data. This has been addressed over the years of the registry and currently all 180 eligible hospitals in England, Wales and Northern Ireland are now regularly uploading data. | Annual reports, research and quality improvement projects. The NHFD website provides summary data for local teams to use eg admission numbers, time to an orthopaedic ward, time to surgery, casemix, performance against NICE standards - these are set against reference lines from national average figures. NHFD has since 2015 been using colour coding and grading on their tables to allow readers to ascertain how their hospital is performing and in which quartile their practice lies when compared with national performance. Benchmarking comparisons between hospitals are difficult, as different trauma units have very differing catchment areas. For this reason NHFD has developed a run chart that allows individual hospitals to benchmark their performance against their own previous figures, and to monitor the effectiveness of local initiatives to avoid inpatient falls. | Website charts will be made to the public as part of NHFD's commitment to the transparency of audit data | Continuous and comprehensive data capture is challenging, and hard to achieve using already busy clinical staff with inevitably conflicting priorities. In particular, rigorous documentation of time of arrival and follow-up at 30 and 120 days is challenging. In 2015 there was poor reporting of pressure ulcers (4180; 2%) and no reoperations (47180; 2%), suggesting that hospitals have no mechanism to monitor these patient safety concerns. In earlier registry reports, they identified concerns about data collection and inaccuracies of data included (eg fracture type, nature of surgery, follow up. This has improved over time. | Between 2007 (start of registry) and 2011 rates of early surgery increased from 54.5% to 71.3% nationally, having been stable previously. Thirty-day mortality fell from 10.9% to 8.5%, compared with a smaller reduction from 11.5% to 10.9% before 2007. Annual relative reduction in adjusted 30-day mortality was just 1.8% from 2003 to 2007, but 7.6% over 2007-11 (p<0.001). The study results suggest that by 2011 around 1,000 fewer people a year died within 30 days of hospital admission for hip fracture than would be expected had pre-2007 time trends continued as before. Some of this additional improvement could be due to other policies, as well as the introduction of the NHFD. The NHFD occupies an increasingly central position in supporting other agencies to monitor and evaluate the quality of healthcare delivered to frail older people. These agencies include COC, Monitor, CCGs, NICE). Registry enables participating centres to learn from theirs and others experiences and improve care | Prompt and reliable feedback to participating units is an essential feature of successful audit | Personal confidential data items for this audit were processed by Crown Informatics under section 25(1) of the NHS Act 2006) approval, prior to anonymisation. Data are anonymised and securely transferred to the Royal College of Surgeons of England for analysis. Data were collected and processed with specific approval of the secretary of state for health on the recommendation of the Health Research Authority (HRA) Confidentiality Advisory Group (CAG) under the Health Service (Control of Patient Information) Regulations 2002. This is more commonly referred to as section 251 support or 'approval' actually refer to approval given under the authority of these regulations. Secure access for staff involved in the treatment of patients with hip fracture to the NHFD database is requested by the NHFD lead clinician for each organisation that uploads data. Once the request is validated, secure access is provided by the NHFD administration team to facilitate data entry to the audit. The data are entered via a secure website, and access to this is via a secure login name and password |
|----------------------------------------------------|----------------------------------------------------------------------------------------------|------------|------|---------------|--------------------------------------------------------------------------------------------------------------------------------------------------------------------------------|----------------------------------------------------------------------------------------------------------------------------------------------------------------------------------------------------------------------------------------------------------------------------------------------------------------------------------------------------------------------------------------------------------------------------------------------------------------------------------------------------------------------------------------------------------------------------------------------------------------------------------------------------------------------------------------------------------------|------------------------------------------------------------------------------------------------------------------------------------------------------------|-------------------------------------------------------------------------------------------------------------------------------------------------------------------------------------------------------------------------------------------------------------------------------------------------------------------------------------------------------------------------------------------------------------------------------------------------------------------------------------------------------------------------------------------------------------------------------------------------------------------------------------------------------------------------------------------------------------------------------------------------------------------------------------------------------------------------------------------------------------------------------------------------------------------------------------------------------------------------------------------------------------------------------------------------------------------------------------------------------------------------------------------------------------------------------------------------------------------------------------------------------------------------------------------------------------------------------------------------------------------------------------------------------------------------------------------|-------------------------------------------------------------------------------------------------------------------------------------------------------------------------------------------------------------------------------------------------------------------------------------------------------------------------------------------------------------------------------------------------------------------------------------------------------------------------------------------------------------------------------------------------------------------------------------------------------------------------------------------------------------------------------------------------------------------------------------------------------------------------------------------------------------------------------------|-----------------------------------------------------------------------|-------------------------------------------------------------------------------------------------------------------------------------------------------------------------------------------------------------------------------------------------------------------------------------------------------------------------------------------------------------------------------------------------------------------------------------------------------------------------------------------------------------------------------------------------------------------------------------------------------------------------------------------|------------------------------------------------------------------------------------------------------------------------------------------------------------------------------------------------------------------------------------------------------------------------------------------------------------------------------------------------------------------------------------------------------------------------------------------------------------------------------------------------------------------------------------------------------------------------------------------------------------------------------------------------------------------------------------------------------------------------------------------------------------------------------------------------------------------------------------------------------------------------------------------------------------------------------------------------------------------------------------------------------------|------------------------------------------------------------------------------------------------------------------------------------------------------------------------------------------------------------------------------------------------------------------------------------------------------------------------------------------------------------------------------------------------------------------------------------------------------------------------------------------------------------------------------------------------------------------------------------------------------------------------------------------------------------------------------------------------------------------------------------------------------------------------------------------------------------------------------------------------------------------------------------------------------------------------------------------------------------------------------------------------------------------------------------------------------------------------------------------------------------------------------------------------------------------------------------------------------------------------------------------------------------|------------------------------------------------------------------------------------------------------------------------------------------------------------------------------------------------------------------------------------------------------------------------------------|--------------------------------------------------------------------------------------------------------------------------------------------------------------------------------------------------------------------------------------------------------------------------------------------------------------------------------------------------------------------------------------------------------------------------------------------------------------------------------------------------------------------------------------------------------------------------------------------------------------------------------------------------------------------------------------------------------------------------------------------------------------------------------------------------------------------------------------------------------------------------------------------------------|----------------------------------------------------------------------------------------------------------|-----------------------------------------------------------------------------------------------------------------------------------------------------------------------------------------------------------------------------------------------------------------------------------------------------------------------------------------------------------------------------------------------------------------------------------------------------------------------------------------------------------------------------------------------------------------------------------------------------------------------------------------------------|-----------------------------------------------------------------------------------------------------------------------------------------------------------------------------------------------------------------------------------------------------------------------------------------------------------------------------------------------------------------------------------------------------------------------------------------------------------------------------------------------------------------------------------------------------------------------------------------------------------------------------------------------------------------------------------------------------------------------------------------------------------------------------------------------------------------------------------------------------------------------------------------------------------------------------------------------------------------------------------------------------------------------------------|-------------------------------------------------------------------------------------------------|---------------------------------------------------------------------------------------------------------------------------------------------------------------------------------------------------------------------------------------------------------------------------------------------------------------------------------------------------------------------------------------------------------------------------------------------------------------------------------------------------------------------------------------------------------------------------------------------------------------------------------------------------------------------------------------------------------------------------------------------------------------------------------------------------------------------------------------------------------------------------------------------------------------------------------------------------------------------------------------------------------------------------------------------------------------------------------------------------------------------------------|

|                                                                                                                                                                                                                                                                                                         |                                                                       |                                                                                                  |      |                            |                                                                                                                                     |                                                                                                                                                                                                                                                                                                    |                                                                                                                                                                                                                                                                                                    |                                                                                                                                                                                                                                                                                                                          |                                                                                                                                                                                                                                                                                                                                                                                                                                                                                                                                                                                                                                                                                                                                                                                                                                                                                                                                                                                                                                                                            |                                                                                                                                                                                                                                                                                     |                                                                                                                                                                                                                                                                                                                                                    |                                                                                                                                                                                                                                                                                                                                                                                                          |                                                                                                                                                                                                                                                                                                                                                                                     |                                                                                                                                                                                                                                                                                                                                                                                                                                                                                                                                                                                                                                                                                                                                                                                                                                                                                                                                                            |                                                                                                                                                                                                                                                                                                                                                                                                                                                                                                                                                                                                                                                                                                                                                                                                                                                                                                             |                                                                                                                                                                                                                                                                                                                             |                                                                                                                                                                                                                                                                                 |                                                                                                                                                                                                                                                                                                                                                                                                                                                                                                                                          |                                                                                                                                                                                                                                                                                                        |    |                                                                                                                                                                                                                                                                                                                          |
|---------------------------------------------------------------------------------------------------------------------------------------------------------------------------------------------------------------------------------------------------------------------------------------------------------|-----------------------------------------------------------------------|--------------------------------------------------------------------------------------------------|------|----------------------------|-------------------------------------------------------------------------------------------------------------------------------------|----------------------------------------------------------------------------------------------------------------------------------------------------------------------------------------------------------------------------------------------------------------------------------------------------|----------------------------------------------------------------------------------------------------------------------------------------------------------------------------------------------------------------------------------------------------------------------------------------------------|--------------------------------------------------------------------------------------------------------------------------------------------------------------------------------------------------------------------------------------------------------------------------------------------------------------------------|----------------------------------------------------------------------------------------------------------------------------------------------------------------------------------------------------------------------------------------------------------------------------------------------------------------------------------------------------------------------------------------------------------------------------------------------------------------------------------------------------------------------------------------------------------------------------------------------------------------------------------------------------------------------------------------------------------------------------------------------------------------------------------------------------------------------------------------------------------------------------------------------------------------------------------------------------------------------------------------------------------------------------------------------------------------------------|-------------------------------------------------------------------------------------------------------------------------------------------------------------------------------------------------------------------------------------------------------------------------------------|----------------------------------------------------------------------------------------------------------------------------------------------------------------------------------------------------------------------------------------------------------------------------------------------------------------------------------------------------|----------------------------------------------------------------------------------------------------------------------------------------------------------------------------------------------------------------------------------------------------------------------------------------------------------------------------------------------------------------------------------------------------------|-------------------------------------------------------------------------------------------------------------------------------------------------------------------------------------------------------------------------------------------------------------------------------------------------------------------------------------------------------------------------------------|------------------------------------------------------------------------------------------------------------------------------------------------------------------------------------------------------------------------------------------------------------------------------------------------------------------------------------------------------------------------------------------------------------------------------------------------------------------------------------------------------------------------------------------------------------------------------------------------------------------------------------------------------------------------------------------------------------------------------------------------------------------------------------------------------------------------------------------------------------------------------------------------------------------------------------------------------------|-------------------------------------------------------------------------------------------------------------------------------------------------------------------------------------------------------------------------------------------------------------------------------------------------------------------------------------------------------------------------------------------------------------------------------------------------------------------------------------------------------------------------------------------------------------------------------------------------------------------------------------------------------------------------------------------------------------------------------------------------------------------------------------------------------------------------------------------------------------------------------------------------------------|-----------------------------------------------------------------------------------------------------------------------------------------------------------------------------------------------------------------------------------------------------------------------------------------------------------------------------|---------------------------------------------------------------------------------------------------------------------------------------------------------------------------------------------------------------------------------------------------------------------------------|------------------------------------------------------------------------------------------------------------------------------------------------------------------------------------------------------------------------------------------------------------------------------------------------------------------------------------------------------------------------------------------------------------------------------------------------------------------------------------------------------------------------------------------|--------------------------------------------------------------------------------------------------------------------------------------------------------------------------------------------------------------------------------------------------------------------------------------------------------|----|--------------------------------------------------------------------------------------------------------------------------------------------------------------------------------------------------------------------------------------------------------------------------------------------------------------------------|
| 1<br>2<br>3<br>4<br>5<br>6<br>7<br>8<br>9<br>10<br>11<br>12<br>13<br>14<br>15<br>16<br>17<br>18 <sup>50</sup><br>19<br>20<br>21<br>22<br>23<br>24<br>25<br>26<br>27<br>28<br>29<br>30<br>31<br>32<br>33<br>34<br>35<br>36<br>37<br>38<br>39<br>40<br>41<br>42<br>43<br>44<br>45<br>46<br>47<br>48<br>49 | Clinical Effectiveness Unit, The Royal College of Surgeons of England | National Vascular Registry: 2015 Annual report. London: The Royal College of Surgeons of England | 2015 | National vascular registry | Emergency or elective procedures for the following patient groups: Peripheral arterial disease, AAA repair, CEA or carotid stenting | National Vascular Database (NVD), the Carotid Interventions Audit, VSGBI Audit, Committee                                                                                                                                                                                                          | The NVR is assisted by the Audit and Quality Improvement Committee of the Vascular Society and overseen by a Project Board, which has senior representatives from the participating organisations and the commissioning organisation                                                               | Aim of the registry: To provide comparative information on the performance of NHS vascular units and support local quality improvement as well as inform patients about major vascular interventions delivered in the NHS. Aim of the 2015 report: To give an overall picture of the care provided by NHS vascular units | Web-based system. The registry was created from an amalgamation of the National Vascular Database (NVD) and the Carotid Interventions Audit. A new IT system was developed in collaboration with Northgate Information Systems in 2014. The most notable changes were to the datasets for the four procedures in the old NVD and the addition of a new dataset for lower-limb angioplasty / stent procedures. These changes were based on advice from vascular specialists on ways to simplify how data were recorded, and to ensure the datasets reflect changes in clinical practice. As a result, the NVR datasets for each procedure are now smaller and the recording of patient characteristics is more consistent across the procedures. A further improvement is that the records for patients who have one operation and later come back for another are now linked. As this is a procedure based registry, it was decided to focus mainly on outcomes rather than the process of care. The registry took on-board comments from users to develop the data items. | Funding by HQIIP as part of the National Clinical Audit Programme (NCA), HQIIP holds the contract to manage and develop the NCA Programme                                                                                                                                           | The amputation dataset was adapted to capture key issues highlighted by the 2014 National Confidential Enquiry into Patient Outcomes and Deaths (NCEPOD) review of lower limb amputation.                                                                                                                                                          | Demographics, procedure, time to surgery (emergency and elective), formal anaesthetic review, fitness measurement, pre-operative imaging, whether patient discussed at MDT meeting, procedure, mortality, complications, further unplanned intervention                                                                                                                                                  | NS                                                                                                                                                                                                                                                                                                                                                                                  | NHS hospitals in England and Wales are required to report on their participation in the Vascular Registry as part of their Quality Account. Several online reports were introduced to support data entry. The registry team developed an online report designed to support consultant revalidation. The NVR used an IT system that has evolved following consultation with users and vascular specialists. This evolution and improvement in systems has improved data completeness. For example, some of the characteristics used for risk adjustment were typically entered for between 80-85% of patients. Variables used for risk adjustment are now mandated which has resulted in 100% completeness for these characteristics from January 2014. When the NVR updated its dataset, following advice from vascular specialists, they were advised to simplify how data were recorded, and to ensure the datasets reflect changes in clinical practice | 2871 endovascular and 5387 bypass procedures (For peripheral disease) performed in the 2014 calendar year - corresponds to an estimated case-ascertainment of 15% and 30% respectively. Likely that the cohort of patients captured by the NVR in 2014 for were less sick than all patients having a major lower limb amputation - this could explain the lower than expected mortality rate obtained by the NVR for lower limb amputation. From routine hospital data, estimated that there were approximately 2300 below knee and 2500 above knee amputations performed in UK hospitals for peripheral arterial disease during 2014. 1265 of the latter, giving an estimated case-ascertainment of approximately 50% for both procedures. There is high case attainment for data collected by NVR for elective AAA repair and CEA. However need improvements in case attainment for lower limb procedures | Annual reports. Reports contain options that allow the results to be tailored to the user's requirements.                                                                                                                                                                                                                   | NS                                                                                                                                                                                                                                                                              | In some cases incomplete data on MDT assessment and date of imaging. Data submission rates for lower limb revascularisation need to improve if the NVR is going to reach its full potential in supporting us to make these improvements                                                                                                                                                                                                                                                                                                  | The data from NVR is particularly useful when undertaking local reviews of vascular services and commissioning groups are increasingly likely to rely on this information. Helpful when comparing services nationally.                                                                                 | NS | NS                                                                                                                                                                                                                                                                                                                       |
|                                                                                                                                                                                                                                                                                                         | NJR Editorial Board                                                   | NJR 12th Annual Report                                                                           | 2015 | National Joint Registry    | Hip, knee, ankle, elbow, shoulder replacement surgery                                                                               | British Orthopaedic Association (BOA), Medical Advisory Committee (through which specialist orthopaedic societies are formally represented), International Society of Arthroplasty Registers. The NJR works with many stakeholders including patients, regulators, hospitals, industry, individual | The NJR is managed by the Healthcare Quality Improvement Partnership (HQIP) under a contract with NHS England as part of the National Clinical Audit and Patient Outcomes Programme (NCAPOP). HQIP supports clinicians and the NJR Steering Committee and all its sub-committees. The NJR Steering | To collect information on all hip, knee, ankle, elbow and shoulder replacement operations, to monitor the performance of joint replacement implants and the effectiveness of different types of surgery, improving clinical standards and benefiting patients. The NJR helps orthopaedic device manufacturers            | Developed by Department of Health and Welsh Government in 2002.                                                                                                                                                                                                                                                                                                                                                                                                                                                                                                                                                                                                                                                                                                                                                                                                                                                                                                                                                                                                            | The NJR is funded through a levy raised on hip, knee, ankle, elbow and shoulder procedures. Up until 31 March 2014, the NJR levy payment on hip, knee, ankle, elbow and shoulder implants was collected from purchasing hospitals by orthopaedic device manufacturers processed the | The majority of the data can be collected via tick boxes, some information is required in white space format. In terms of collecting PROMS - There is interest in how patient reported outcomes of joint surgery change in the longer term and whether the outcomes of surgery are best evaluated at six months after surgery or at a later point. | Patient consent, demographics, operation date, ASA grade, anaesthetic type, operation funding, consultant in charge, operating surgeon grade and name, first assistant grade, side of operation, BMI, indications, procedure, patient thromboprophylaxis regime at time of operation, untoward intraoperative events, primary or secondary procedure, indication for revision cases, type of implant and | Data input by surgeons. Data can be entered electronically directly into the NJR database. Printed forms are also available. Currently, all patients treated by or on behalf of NHS England for an elective knee and/or hip joint replacement are invited to complete a PROMS questionnaire prior to surgery and again at six months after surgery. Data cleaning is carried out eg | Any provider carrying out hip, knee, ankle, elbow or shoulder surgery is now mandated to submit 100% of eligible primary and revision procedures to the NJR (including the NJR CNJR sector). NJR has a Supporting Data Quality Strategy. This outlines the current and future intentions for data quality. Crucially, this                                                                                                                                                                                                                                                                                                                                                                                                                                                                                                                                                                                                                                 | Compliance in data submission was 96.6%. Consent was obtained in 91.8% of cases and linkability was possible in 95.15 of cases. The CNJR has a Supporting Data Quality Strategy. This outlines the current and future intentions for data quality. Crucially, this                                                                                                                                                                                                                                                                                                                                                                                                                                                                                                                                                                                                                                          | Has online patient report website NJR reports/Digital annual reporting arrangements and new interactive clinical activity reports. Also has annual reports. There is also publication on outcomes of individual surgeons. Specific website providing information about hospital. The reporting website has historical data, | Drive towards patient engagement in the registry and bringing the patient voice to the heart of NJRSC decision making. Patients will be able to see individual hospital performance and compliance in terms of submitting data through the NJR data publication and NHS Choices | Sufficient resources for the registry. 11% of records have been excluded because there were insufficient patient details to enable linkage. Cases from Northern Ireland were excluded because there was no tracing service for them. Person-level identifier was available for 96% of operations since the beginning of 2008, but in earlier years the proportion had been much lower - therefore long-term follow up data may not be as representative as short-term follow up data. In 4.4% of cases of revision surgery, there was no | The registry supports transparency by using and sharing relevant hospital, surgeon and implant-pricing data, as well as enabling the linkage of NJR data with other expanding healthcare information, and helps tackle issues and problems in joint replacement surgery. The registry helps choose the | NS | Must have patient consent prior to collection of data. Patient consent to record their details in the NJR was recorded as 93.8%. o avoid sending paper records through the post and to ensure maximum protection to the data, the NJR uses an electronic system for collecting the data. This includes a secure link for |

1  
2  
3  
4  
5  
6  
7  
8  
9  
10  
11  
12  
13  
14  
15  
16  
17  
18  
19  
20  
21  
22  
23  
24  
25  
26  
27  
28  
29  
30  
31  
32  
33  
34  
35  
36  
37  
38  
39  
40  
41  
42  
43  
44  
45  
46  
47  
48  
49

surgeons and procurement important to form international collaborations - to help ensure that the registry has the ability to harmonise with global orthopaedic device initiatives

Committee is an NHS England Committee of experts. There are industry representatives on the steering committee. The committee is responsible for overseeing the strategic direction of the NJR. Also have sub-committees, Implant Performance Sub-committee, Surgeon Outlier Sub-committee. There is also a NJR management team that supports the work of the Steering Committee. Regional clinical coordinators (RCCs) and regional coordinators (RCs) work in partnership to ensure that hospitals are supported in their understanding of the requirements of the NJR. The NJR Centre has been set up to manage the development and running of the NJR database for all data collection and to help share NJR information with clinicians, patients and other stakeholders

expanding to the Isle of Man

levy on behalf of the NJR and then made the payment to the registry. In return for their role in administering the levy, manufacturers charge a supplier administration fee which was included in the calculation of the levy. The cost per joint was £20.00 (inc administrative fee). From April 2014, the cost of the NJR levy is a new, lower rate of £15.60 per procedure where each organisation is issued with an annual invoice directly from the Healthcare Quality Improvement Partnership (HQIP) for an NJR subscription charge based upon the provider's prior year's procedure volume. Orthopaedic device manufacturers contributed towards the NJR Management Feedback system which supports post-market implant surveillance

brand, morbidity, mortality, pre and post operative PROMS (PROMS included Oxford Knee scores, EQ-5D, PROMS at 6 months post op, 1 and 3 years after their primary procedure), hospital submitting data, time to follow up, implant survivorship, white space surgeon notes

removing duplicates. Patient consent and a valid NHS number allows the NJR to link a patient's primary and revision operation together, giving a picture of implant survivorship by implant type and brand. Documentation of implant survivorship and mortality requires a person-level identifier to be able to relate primary and revision operations on the same individual. I

increase participation through a national programme of local audits to assess data completeness and quality. These audits work to identify where data might be missing to improve the general quality of their data in the registry. Those actively taking part in the audit and achieving best practice and quality will gain the new NJR Quality Data Provider certification. Renewable annually, this award is designed to recognise quality data provision and the commitment to patient safety through compliance. The certification will also highlight those hospitals who do not comply with mandatory NJR requirements, communicating this status through the NJR data publication and NHS Choices websites, thus allowing patients to be aware of hospitals that choose not to meet NJR quality standards. When organisation provide data to the NJR, the NJR shares information it has on best implant prices that can help trusts save costs - this implant price benchmarking service is called INFORM. The introduction of the Best Practice Tariff for hip replacements provides incentives for hospitals to report data to the NJR.

includes a programme of work in partnership with hospitals to encourage compliance; while data capture for the NJR is mandatory, many hospitals struggle to achieve it. The number of cases reported to the registry every year is now in excess of 200,000. 2014/15 had the highest ever annual number of submissions at 226.87. The total number of procedures recorded was 1.8 Million at March 2015. Patients who had elective primary knee replacement in 2010 were asked to complete pre and postoperative PROMS - of the 32,147 invited participants, 20,721 and 17,485 respectively responded at one and three years post op. Of a total of 1,837,781 NJR records, around 11% have been lost because no suitable person-level identifier was found - in around half of these 201,546 procedures (47.3%), the patient had declined to give consent for details to be held, the remainder being attributable to tracing and linkage difficulties. Linkability (the ability to link a patient's primary procedure to a revision procedure) was recorded as 92.8%

going back to 2005 in most cases. Using the dedicated website, readers can use interactive, filterable graphs to identify the key information and trends associated with reports for hip, knee, ankle, elbow and shoulder data. Able to see data on how many hospital are participating in the NJR. Data reporting includes mortality, rates of revision, reasons for revision, survivorship analysis. The steering committee facilitate the use of NJR data for research

websites. They have developed websites for patients that give information on how hospitals are performing. There are two patient representative s on the steering committee

primary operation for that patient recorded in the NJR. This would have been either because the primary had taken place at an earlier point in time (before the NJR data collection period began in 2003) or was not included for other reasons such as the operation being performed outside the geographical catchment area of the NJR or consent for data linkage not being provided at the time of the primary procedure. Some revision cases were excluded because they could not be matched to primary joint replacements.

best implants for patients. It empowers patients by helping them find out more about the implants available. The registry improves patient safety by showing how well implants, surgeons and hospitals perform and take action where it is needed. It gives hospitals, surgeons and implant manufacturers feedback about their performance to help them improve patient care. It helps surgeons quickly decide whether patients need to return to hospital if implant problems are found

transferring the data from the hospital to the central database. All the data held on the central database is encrypted to provide further protection. Patients' personal data is treated as confidential at all times and cannot be used outside of the NJR. This data is only available to the patient that it relates to and their surgeon. The steering committee facilitates the use of NJR data for research. Data collected via the NJR may be used for medical research but only if it has passed ethical review and if the outcomes are expected to provide significant benefits to the healthcare of patients. However, any data provided will be anonymised so that it is not possible to identify individuals. In accordance with the Data Protection act (1998), patients can request a copy of the personal information that the NR holds about them at any time

|   |                                              |                                                                                     |      |                                                       |                   |                                      |                                        |                                      |                                                                                                              |                                                                                                          |                                                                                                                                                |                                                                                                                                                                                                                                                                                                                                                                                                                                                                                                                                                                                                                                              |                                                                |                                                                                                                                                                                                                                                                                                                                                                                                                                                                                                                                                                                                                                                                                                                                                                                                                                                                                                                                                       |                                                                                                                                                                                                                                                                                                                                                                                                                                                                                                                                                                                                                                                                                                                                                                                                                                                                                                |    |                                                                                                                                                                                                                                                                                                                                                                                                                                                                                                                                                                                                                                                                                                                                                                                                                                                                |                                                                                   |                                                                    |                                                                                                                                                                                                                                |
|---|----------------------------------------------|-------------------------------------------------------------------------------------|------|-------------------------------------------------------|-------------------|--------------------------------------|----------------------------------------|--------------------------------------|--------------------------------------------------------------------------------------------------------------|----------------------------------------------------------------------------------------------------------|------------------------------------------------------------------------------------------------------------------------------------------------|----------------------------------------------------------------------------------------------------------------------------------------------------------------------------------------------------------------------------------------------------------------------------------------------------------------------------------------------------------------------------------------------------------------------------------------------------------------------------------------------------------------------------------------------------------------------------------------------------------------------------------------------|----------------------------------------------------------------|-------------------------------------------------------------------------------------------------------------------------------------------------------------------------------------------------------------------------------------------------------------------------------------------------------------------------------------------------------------------------------------------------------------------------------------------------------------------------------------------------------------------------------------------------------------------------------------------------------------------------------------------------------------------------------------------------------------------------------------------------------------------------------------------------------------------------------------------------------------------------------------------------------------------------------------------------------|------------------------------------------------------------------------------------------------------------------------------------------------------------------------------------------------------------------------------------------------------------------------------------------------------------------------------------------------------------------------------------------------------------------------------------------------------------------------------------------------------------------------------------------------------------------------------------------------------------------------------------------------------------------------------------------------------------------------------------------------------------------------------------------------------------------------------------------------------------------------------------------------|----|----------------------------------------------------------------------------------------------------------------------------------------------------------------------------------------------------------------------------------------------------------------------------------------------------------------------------------------------------------------------------------------------------------------------------------------------------------------------------------------------------------------------------------------------------------------------------------------------------------------------------------------------------------------------------------------------------------------------------------------------------------------------------------------------------------------------------------------------------------------|-----------------------------------------------------------------------------------|--------------------------------------------------------------------|--------------------------------------------------------------------------------------------------------------------------------------------------------------------------------------------------------------------------------|
| 1 | David Chadwick, Robert Kinsman, Peter Walton | The British Association of Endocrine and Thyroid Surgeons 4th National Audit Report | 2012 | UK Registry of Endocrine and Thyroid Surgery (UKRETS) | Endocrine Surgery | National Cancer Intelligence Network | BAETS and Dendrite manage the registry | To ensure high quality surgical care | Dendrite build, maintain and host the registry. They also provide the data analysis and publish the reports. | Sponsorship by Covidien since 2011 and ongoing. Ethicon Endo-Surgery provided the initial start up funds | It is important to have a balance between collecting sufficient minimum data to provide worthwhile analysis, and the burden of over-collection | Demographics, indication for surgery, diagnosis, other diagnoses, site of lesion (left/right), date of operation, histology, use of fine needles aspiration, length of stay, complications, imaging, use of nerve monitor, use of harmonic scalpel, use of ligasure, pre-operative imaging, use of MDT, use of laryngoscopy, grade of surgeon, grade of assistant, consultant involvement, post operative vocal cord assessment, procedure information, type of approach (posterior, endoscopic, open, transperitoneal etc), energy source (bimonopolar), re-operation, only patient comments and surgeon comments are in white space format | Electronic data collection. Dendrite involved in data analysis | Participating in the UKRETS is an obligatory requirement for BAETS Full Members. It is a requirement of HQIP that all thyroid operations are entered onto UKRETS as thyroid surgery has been chosen by the Chief Medical Officer to be one of 13 specialties where consultant level outcomes should be openly available for public viewing. The registry facilitates appraisal and revalidation process. Surgeons get personal results. Having mandatory fields will make it impossible to log off without completion. Making data submission compulsory for membership will also increase data completion. Other methods to improve data entry include: publishing of members' rates of complete data; identification of those high-volume surgeons with high rates of complete data, with a view to sharing their methodology for successful and comprehensive data acquisition; prevent cases being logged until certain basic fields are complete | The report has outcomes of 29,000 surgical procedures. There was enormous variation between individual surgeons with respect to their rate of missing data. Some achieved well above average rates of data completeness, some at or close to 100% complete. Others, however, have high rates of incomplete entries, occasionally close to zero percent. The variation did not appear to be due to surgeon volume, with many of the highest volume surgeons represented amongst the enthusiasts, despite the larger number of cases requiring data entry. Audit fatigue over time also does not appear to explain this divergence, as rates of incomplete data entry are stable over the last 5-6 years. However, data entry for outcomes at follow-up is less complete than for outcomes at discharge, reflecting the increased effort required to obtain these data and update the case entry | NS | It is a purely a surgical database, so that data on for instance adjuvant therapies for thyroid cancer or for tumours not undergoing surgery are not collected. The majority of thyroidectomies in the United Kingdom are performed by non-BAETS members, and therefore are not recorded in our audit. There is considerable variation between members in completeness of data entry - this variation, and the level of missing data overall, has the potential to compromise assessment of surgical outcomes. There was considerable missing data for all endocrine case types. For examples, even the most basic data that would allow simple calculation of complication rates were missing in over 10% of cases on average. Other data fields have even higher proportions of incomplete data entry. This is similar to parathyroid and adrenal data entry | Facilitate appraisal and revalidation process, surgeons will get personal results | Success of a registry is dependant on it's members to submit data. | Access to UKRETS is granted on Full Membership of BAETS. Surgeons can then access the registry to enter details of all endocrine operations. Access to data for research requires a formal application and peer review process |
|---|----------------------------------------------|-------------------------------------------------------------------------------------|------|-------------------------------------------------------|-------------------|--------------------------------------|----------------------------------------|--------------------------------------|--------------------------------------------------------------------------------------------------------------|----------------------------------------------------------------------------------------------------------|------------------------------------------------------------------------------------------------------------------------------------------------|----------------------------------------------------------------------------------------------------------------------------------------------------------------------------------------------------------------------------------------------------------------------------------------------------------------------------------------------------------------------------------------------------------------------------------------------------------------------------------------------------------------------------------------------------------------------------------------------------------------------------------------------|----------------------------------------------------------------|-------------------------------------------------------------------------------------------------------------------------------------------------------------------------------------------------------------------------------------------------------------------------------------------------------------------------------------------------------------------------------------------------------------------------------------------------------------------------------------------------------------------------------------------------------------------------------------------------------------------------------------------------------------------------------------------------------------------------------------------------------------------------------------------------------------------------------------------------------------------------------------------------------------------------------------------------------|------------------------------------------------------------------------------------------------------------------------------------------------------------------------------------------------------------------------------------------------------------------------------------------------------------------------------------------------------------------------------------------------------------------------------------------------------------------------------------------------------------------------------------------------------------------------------------------------------------------------------------------------------------------------------------------------------------------------------------------------------------------------------------------------------------------------------------------------------------------------------------------------|----|----------------------------------------------------------------------------------------------------------------------------------------------------------------------------------------------------------------------------------------------------------------------------------------------------------------------------------------------------------------------------------------------------------------------------------------------------------------------------------------------------------------------------------------------------------------------------------------------------------------------------------------------------------------------------------------------------------------------------------------------------------------------------------------------------------------------------------------------------------------|-----------------------------------------------------------------------------------|--------------------------------------------------------------------|--------------------------------------------------------------------------------------------------------------------------------------------------------------------------------------------------------------------------------|

For peer review only

1  
2  
3  
4  
5  
6  
7  
8  
9  
10  
11  
12  
13  
14  
15<sup>2</sup>  
16  
17  
18  
19  
20  
21  
22  
23  
24  
25  
26  
27  
28  
29  
30  
31  
32  
33  
34  
35  
36  
37  
38  
39  
40  
41  
42  
43  
44  
45  
46  
47  
48  
49

1  
2  
3  
4  
5  
6  
7  
8  
9  
10  
11  
12  
13  
14  
15  
16  
17  
18  
19  
20  
21  
22  
23  
24  
25  
26  
27  
28  
29  
30  
31  
32  
33  
34  
35  
36  
37  
38  
39  
40  
41  
42  
43  
44  
45  
46  
47  
48  
49

|                                          |                                                               |      |                                                                      |                                          |                                                                                                                                               |                                                                                                                                                                                                                                                                                                                                                                                                                                                                                                              |                                                                                                                                                                                                                                                                                                                                                                                                                                                       |    |                                                                                                     |                                                                                                                                                                                                                      |                                                                                                                                                                                                                                                                                                                                                                                                              |                                                                                                                                                                                                                                                                                                                                                                                                                                                                                                                                                                                                                                                                                         |                                                                                                                                                      |                                                                                                                     |                                                                                                                                                                                                                                                                                                                                                                                                                                                                                                                                              |    |    |                                                                                                                                                             |    |                                                                                                                       |
|------------------------------------------|---------------------------------------------------------------|------|----------------------------------------------------------------------|------------------------------------------|-----------------------------------------------------------------------------------------------------------------------------------------------|--------------------------------------------------------------------------------------------------------------------------------------------------------------------------------------------------------------------------------------------------------------------------------------------------------------------------------------------------------------------------------------------------------------------------------------------------------------------------------------------------------------|-------------------------------------------------------------------------------------------------------------------------------------------------------------------------------------------------------------------------------------------------------------------------------------------------------------------------------------------------------------------------------------------------------------------------------------------------------|----|-----------------------------------------------------------------------------------------------------|----------------------------------------------------------------------------------------------------------------------------------------------------------------------------------------------------------------------|--------------------------------------------------------------------------------------------------------------------------------------------------------------------------------------------------------------------------------------------------------------------------------------------------------------------------------------------------------------------------------------------------------------|-----------------------------------------------------------------------------------------------------------------------------------------------------------------------------------------------------------------------------------------------------------------------------------------------------------------------------------------------------------------------------------------------------------------------------------------------------------------------------------------------------------------------------------------------------------------------------------------------------------------------------------------------------------------------------------------|------------------------------------------------------------------------------------------------------------------------------------------------------|---------------------------------------------------------------------------------------------------------------------|----------------------------------------------------------------------------------------------------------------------------------------------------------------------------------------------------------------------------------------------------------------------------------------------------------------------------------------------------------------------------------------------------------------------------------------------------------------------------------------------------------------------------------------------|----|----|-------------------------------------------------------------------------------------------------------------------------------------------------------------|----|-----------------------------------------------------------------------------------------------------------------------|
| National Bowel Cancer Audit Project Team | National Bowel Cancer Audit Report                            | 2015 | National Bowel Cancer Audit                                          | Colon and rectal cancer.                 | Health & Social Care Information Centre, Association of Coloproctology of Great Britain and Ireland, and the Royal College of Surgeons, HQUIP | Leadership from the National Bowel Cancer Audit Project Board. The Health and Social Care Information Centre provides project management and technical infrastructure, while the ACPGBI provides clinical leadership and direction. The audit was carried out by the Clinical Effectiveness Unit (CEU) of the Royal College of Surgeons of England in partnership with the Association of Coloproctologists of Great Britain and Ireland (ACPGBI), and the Health and Social Care Information Centre (HSCIC) | To improve the quality of care and survival of patients with bowel cancer, and meets the requirements as set out in the NHS cancer plan, NICE guidelines and the report of the Bristol Royal Infirmary inquiry. To provide more information on the prevention, diagnosis, treatment and care of this disease and the outcomes. Audit's overall aim is to measure the quality of care and survival of patients with bowel cancer in England and Wales. | NS | Funding by the HQUIP as part of the National Clinical Audit and Patient Outcomes Programme (NCAPOP) | Measures for cancer management were drawn from NICE and ASGBI. The dataset has been redesigned to contain fewer items, some of which are mandatory, with the aim of improving data completeness across all patients. | Demographics, date of diagnosis, organisation first seen, source of referral, major site of cancer, performance status, synchronous cancer, planned cancer treatment type, reason for no treatment, TNM category, ASA, monitoring, curability, surgical urgency, primary procedure, surgical access, immediate post-operative care, status of excision margin, treatment modality (all have drop down lists) | All participating trusts submit their data via the Clinical Audit Platform. The Welsh data is submitted directly from the Cancer Network Information System Cymru to the Clinical Audit Platform. The analyses for the report was carried out by the Clinical Effectiveness Unit of the Royal College of Surgeons of England with support from the Health and Social Care Information Centre. The Audit dataset is linked to HES data at the patient level to obtain further information on patient care and follow-up, such as stoma reversal and emergency readmissions in England. HES is useful for analysing patient follow-up, such as emergency readmissions and stoma provision | The dataset has been redesigned to contain fewer items, some of which are mandatory, with the aim of improving data completeness across all patients | This audit includes data on over 30,000 patients diagnosed with bowel cancer between 1 April 2013 and 31 March 2014 | Annual audit reports. The Audit publishes data at the individual surgeon level in terms of 90 day post-operative mortality for patients undergoing elective/scheduled major surgery after being diagnosed with bowel cancer. Also publish the number of procedures performed by each surgeon. The Audit data collection system has the facility to provide feedback to consultants and Trusts about the data they have submitted. Most results are descriptive and are presented in simple tables with percentages of patients in each group | NS | NS | NS                                                                                                                                                          | NS | Data protection and privacy is an important part of the Audit. No individual patient can be identified in the results |
| The Ear Foundation                       | The UK National Registry for Bone Conducting Hearing Implants | 2015 | The UK National Registry for Bone Conducting Hearing Implants (BCHI) | Bone Conduction Hearing Implant Registry | 13 centres performing BCHI                                                                                                                    | Ear Foundation                                                                                                                                                                                                                                                                                                                                                                                                                                                                                               | To identify the number of BCHI nationwide and eventually worldwide, to secure funding for BCHIs, to inform policy and practice, to help plan services.                                                                                                                                                                                                                                                                                                | NS | Supported by Oticon Medical and Cochlear Europe                                                     | NS                                                                                                                                                                                                                   | Demographics, unilateral/bilateral hearing loss, unilateral/bilateral fitting of BCHI, aetiology of hearing loss. Will include usage and indications for BCHI                                                                                                                                                                                                                                                | Data is sent by the participating centre to The Ear Foundation.                                                                                                                                                                                                                                                                                                                                                                                                                                                                                                                                                                                                                         | NS                                                                                                                                                   | Number of users is 3104                                                                                             | Website report                                                                                                                                                                                                                                                                                                                                                                                                                                                                                                                               | NS | NS | Provides outcomes data and can provide evidence of clinical cost-effectiveness. It can help secure funding of BCHIs. It can help inform policy and practice | NS | All data are securely stored and kept confidential                                                                    |

|   |                        |                                                                                                                         |          |                                         |                                      |                                                                                                                                                                                                                                                                                                                                                                                                                                    |                        |                                                                                                                                                                                                                                                                                         |                                                                                                                     |    |                                                                                                                                                                                                                                                                                                                                                                                                                                                                                                                                                                                                                                                                                                                                                                                        |                                                                                                                                                                                                                                                                                                                                                                                                                              |    |                                                                                                                                                                                                                                                                                                                                                                                                                                                                                                                                                                                                                                                                                                                                                                                                                                                                                                                                                                                                                                                                                                                                                                                                                                                                                                                                                                                                                                                                                                                                                                                                                                                                                                                                                                                                                                                                                                                                                              |    |    |                                                                                                                                                                                                                                                                                                                                                                                                                                                                                                                                                                                                             |    |                                                                                                                                                                                                                                                                        |    |                                                                                                                                                                                                                                                                                                                                                                                                                                                                                                                                                                                                                                                                                                                                                                                                   |
|---|------------------------|-------------------------------------------------------------------------------------------------------------------------|----------|-----------------------------------------|--------------------------------------|------------------------------------------------------------------------------------------------------------------------------------------------------------------------------------------------------------------------------------------------------------------------------------------------------------------------------------------------------------------------------------------------------------------------------------|------------------------|-----------------------------------------------------------------------------------------------------------------------------------------------------------------------------------------------------------------------------------------------------------------------------------------|---------------------------------------------------------------------------------------------------------------------|----|----------------------------------------------------------------------------------------------------------------------------------------------------------------------------------------------------------------------------------------------------------------------------------------------------------------------------------------------------------------------------------------------------------------------------------------------------------------------------------------------------------------------------------------------------------------------------------------------------------------------------------------------------------------------------------------------------------------------------------------------------------------------------------------|------------------------------------------------------------------------------------------------------------------------------------------------------------------------------------------------------------------------------------------------------------------------------------------------------------------------------------------------------------------------------------------------------------------------------|----|--------------------------------------------------------------------------------------------------------------------------------------------------------------------------------------------------------------------------------------------------------------------------------------------------------------------------------------------------------------------------------------------------------------------------------------------------------------------------------------------------------------------------------------------------------------------------------------------------------------------------------------------------------------------------------------------------------------------------------------------------------------------------------------------------------------------------------------------------------------------------------------------------------------------------------------------------------------------------------------------------------------------------------------------------------------------------------------------------------------------------------------------------------------------------------------------------------------------------------------------------------------------------------------------------------------------------------------------------------------------------------------------------------------------------------------------------------------------------------------------------------------------------------------------------------------------------------------------------------------------------------------------------------------------------------------------------------------------------------------------------------------------------------------------------------------------------------------------------------------------------------------------------------------------------------------------------------------|----|----|-------------------------------------------------------------------------------------------------------------------------------------------------------------------------------------------------------------------------------------------------------------------------------------------------------------------------------------------------------------------------------------------------------------------------------------------------------------------------------------------------------------------------------------------------------------------------------------------------------------|----|------------------------------------------------------------------------------------------------------------------------------------------------------------------------------------------------------------------------------------------------------------------------|----|---------------------------------------------------------------------------------------------------------------------------------------------------------------------------------------------------------------------------------------------------------------------------------------------------------------------------------------------------------------------------------------------------------------------------------------------------------------------------------------------------------------------------------------------------------------------------------------------------------------------------------------------------------------------------------------------------------------------------------------------------------------------------------------------------|
| 1 | Hazari A.<br>Walton P. | The UK National<br>Flap Registry<br>(UKNFR): A<br>National<br>Database for all<br>pedicled and free<br>flaps in the UK. | 201<br>5 | UK National Flap<br>Registry<br>(UKNFR) | Pedicled and free<br>flap operations | British<br>Association of<br>Plastic<br>Reconstructive<br>and Aesthetic<br>Surgeons<br>(BAPRAS),<br>British<br>Association of<br>Head and Neck<br>Oncologists<br>(BAHNO),<br>British<br>Association of<br>Oral and<br>Maxillofacial<br>Surgeons<br>(BACMS) and<br>Association of<br>Breast Surgery<br>(ABS).<br>Supported by<br>Prof Danny<br>Keenan,<br>Medical<br>Director of<br>HQIP and a<br>practising<br>cardiac<br>surgeon. | Managed by<br>Dendrite | To collect<br>information on all<br>free and major<br>pedicled flap<br>reconstructions<br>for the Head &<br>Neck, Breast,<br>Upper & Lower<br>Limb, Perineum<br>and Trunk<br>carried out in the<br>UK and through<br>this, assess the<br>quality of care we<br>provide for<br>patients. | The registry is<br>multi-browser and<br>will work on Safari,<br>Google Chrome,<br>Firefox, and<br>Internet Explorer | NS | For PROMS<br>questions, they<br>ensured that the<br>number of<br>questions are<br>short, which<br>increases<br>compliance from<br>patients whilst<br>having valid<br>outcomes. Pre-<br>operative baseline<br>Breast PROMS<br>questionnaire is<br>currently not in<br>place as this<br>requires a<br>separate<br>electronic setup<br>and the first time<br>a patient is<br>placed in the<br>registry is on the<br>day of the<br>operation,<br>usually whilst<br>writing the<br>operation note.<br>For Lower Limb<br>reconstruction,<br>the PROMS<br>questionnaire is<br>sent to the<br>patient at 9<br>months. An effort<br>has been made<br>to keep UKNFR<br>use simple as<br>much as possible<br>for surgeons so<br>that it becomes<br>an integral part<br>of their record<br>keeping | A free text box is<br>available in the<br>operation section for<br>additional operation<br>notes. Operative<br>details, Length of<br>stay, Postop chemo,<br>postop radiotherapy,<br>ITU admission<br>(unplanned/<br>planned), date of<br>discharge, and<br>unplanned re-<br>admission to hospital.<br>Patient Reported<br>Outcome Measures<br>(PROMs) are being<br>collected for Breast<br>and Lower Limb<br>Reconstructions | NS | There are time-<br>reported PROMs<br>questionnaires<br>being sent<br>directly to the<br>patient via an<br>automated text/<br>email app and<br>collected centrally,<br>removing the<br>human interface.<br>Keep it as simple<br>as possible for<br>surgeons to use<br>and keep it quick.<br>The UKNFR<br>notes that there<br>is a learning<br>curve speed to<br>entering the data,<br>and initially<br>testers found the<br>first few flags<br>data entry to take<br>longer than 15 -<br>20 min. Once a<br>user conducts a<br>dozen cases or<br>more then the<br>system should<br>become much<br>more familiar<br>only take you a<br>few minutes. It is<br>useful for<br>surgeons - they<br>can use the data<br>for appraisal and<br>revalidation.<br>Outcomes,<br>including<br>PROMs, are high<br>on the NHS<br>agenda:<br>revalidation,<br>robust appraisal<br>and transparency<br>will make such<br>data essential for<br>an individual<br>surgeon as well<br>as for the<br>hospital, and<br>UKNFR will be a<br>powerful<br>resource to<br>deliver this data.<br>The registry is<br>multi-browser<br>and will work on<br>Safari, Google<br>Chrome, Firefox,<br>and Internet<br>Explorer - this<br>makes it easier<br>for the registry to<br>be used. The<br>registry can be<br>accessed on an<br>iPad in a secure<br>and quick<br>manner - the<br>UKNFR is<br>completely tablet<br>device<br>compatible. All<br>incomplete data<br>are highlighted<br>by a yellow<br>triangle and<br>when this is<br>clicked it takes<br>you straight to<br>the field that<br>needs to be<br>completed. The<br>patient record list<br>uses a 'traffic-<br>light' system: an<br>amber<br>background<br>colour indicates<br>incomplete data,<br>green is<br>complete data<br>and red, which is<br>a rare event, will<br>indicate that a<br>patient has died<br>peroperatively.<br>An amber<br>background<br>colour will persist<br>until mandatory<br>fields are<br>complete | NS | NS | Patient<br>Reported<br>Outcome<br>Measures<br>(PROMs) are<br>being<br>collected for<br>Breast and<br>Lower Limb<br>Reconstruc-<br>tions, with time-<br>triggered<br>questionnaires<br>being sent<br>directly to the<br>patient via an<br>automated<br>text/ email app<br>and collated<br>centrally,<br>removing the<br>human<br>interface. For<br>Breast<br>surgery, three<br>BreastQ<br>Reconstructiv<br>e modules:<br>satisfaction<br>with outcome,<br>satisfaction<br>with<br>information<br>and<br>satisfaction<br>with breast,<br>will be sent<br>directly to the<br>patient at 6<br>and 12<br>months. | NS | The data can<br>be used by<br>surgeons for<br>appraisal and<br>revalidation as<br>required by the<br>General<br>Medical<br>Council. The<br>registry will<br>allow<br>appropriate<br>comparison of<br>clinical<br>performance<br>with national<br>and regional<br>peers | NS | The registry<br>requires the<br>entry of patient<br>confidential<br>information.<br>Once these are<br>approved, it<br>means that the<br>user will not<br>have to ask for<br>consent from<br>patients to enter<br>personal<br>confidential<br>information into<br>UKNFR, such<br>as name, date<br>of birth. Until<br>these are<br>granted, written<br>consent must<br>be taken from<br>each patient.<br>For collation at<br>a national level,<br>all personal<br>information is<br>anonymised so<br>that patients<br>cannot be<br>identified. User<br>must accept the<br>Terms of<br>Conditions and<br>privacy policy<br>when you first<br>registered. UKNFR has a<br>"secure" server,<br>which<br>automatically<br>encrypts data<br>traffic between<br>the sever and<br>the "client"<br>computers |
|---|------------------------|-------------------------------------------------------------------------------------------------------------------------|----------|-----------------------------------------|--------------------------------------|------------------------------------------------------------------------------------------------------------------------------------------------------------------------------------------------------------------------------------------------------------------------------------------------------------------------------------------------------------------------------------------------------------------------------------|------------------------|-----------------------------------------------------------------------------------------------------------------------------------------------------------------------------------------------------------------------------------------------------------------------------------------|---------------------------------------------------------------------------------------------------------------------|----|----------------------------------------------------------------------------------------------------------------------------------------------------------------------------------------------------------------------------------------------------------------------------------------------------------------------------------------------------------------------------------------------------------------------------------------------------------------------------------------------------------------------------------------------------------------------------------------------------------------------------------------------------------------------------------------------------------------------------------------------------------------------------------------|------------------------------------------------------------------------------------------------------------------------------------------------------------------------------------------------------------------------------------------------------------------------------------------------------------------------------------------------------------------------------------------------------------------------------|----|--------------------------------------------------------------------------------------------------------------------------------------------------------------------------------------------------------------------------------------------------------------------------------------------------------------------------------------------------------------------------------------------------------------------------------------------------------------------------------------------------------------------------------------------------------------------------------------------------------------------------------------------------------------------------------------------------------------------------------------------------------------------------------------------------------------------------------------------------------------------------------------------------------------------------------------------------------------------------------------------------------------------------------------------------------------------------------------------------------------------------------------------------------------------------------------------------------------------------------------------------------------------------------------------------------------------------------------------------------------------------------------------------------------------------------------------------------------------------------------------------------------------------------------------------------------------------------------------------------------------------------------------------------------------------------------------------------------------------------------------------------------------------------------------------------------------------------------------------------------------------------------------------------------------------------------------------------------|----|----|-------------------------------------------------------------------------------------------------------------------------------------------------------------------------------------------------------------------------------------------------------------------------------------------------------------------------------------------------------------------------------------------------------------------------------------------------------------------------------------------------------------------------------------------------------------------------------------------------------------|----|------------------------------------------------------------------------------------------------------------------------------------------------------------------------------------------------------------------------------------------------------------------------|----|---------------------------------------------------------------------------------------------------------------------------------------------------------------------------------------------------------------------------------------------------------------------------------------------------------------------------------------------------------------------------------------------------------------------------------------------------------------------------------------------------------------------------------------------------------------------------------------------------------------------------------------------------------------------------------------------------------------------------------------------------------------------------------------------------|

1  
2  
3  
4  
5  
6  
7  
8  
9  
10  
11  
12  
13  
14  
15  
16  
17  
18  
19  
20  
21  
22  
23  
24  
25  
26  
27  
28  
29  
30  
31  
32  
33  
34  
35  
36  
37  
38  
39  
40  
41  
42  
43  
44  
45  
46  
47  
48  
49

|                                                                                                                                                              |                                                                                                                    |      |                                                    |                             |                                                                                                                                                                                                                                              |                                                                                                                                                                                                                                                                                                                               |                                                                                                                                                                                                                                                                                                                                                          |                                                                                                                                                                                                                     |                                                                                                                                                                                                                                                                                                                                                                                                                                                                                                                                                                                                                                                                           |                                                                                                                                                                                                                                                                                                                                                                                                      |                                                                                                                                                                      |                                                                                                                                                                                                                                                                                                                                                                                                                                                                                                                                                                                                                  |                                                                                                                                                                                                                                                                                                                                             |                                                                                                                                                                                                                                                                                                                                                                                                                                                                                                |                                                                                                                                                         |    |                                                                                                                                                                                                                                                                                                                                                                                                                                                                                                                                                                                                                                                                                                                                                                     |                                                                                                                      |                                                                                                                                                                                                                                                                                                                                                                                                                                                                                                                                                                                                                                                                                                                                                                                                                                                            |                                                                              |                                                                                                                                                                                                                                                                                                                                                                                                                                                                                                                                                                                                                                                                                                                                                                                                                                                            |
|--------------------------------------------------------------------------------------------------------------------------------------------------------------|--------------------------------------------------------------------------------------------------------------------|------|----------------------------------------------------|-----------------------------|----------------------------------------------------------------------------------------------------------------------------------------------------------------------------------------------------------------------------------------------|-------------------------------------------------------------------------------------------------------------------------------------------------------------------------------------------------------------------------------------------------------------------------------------------------------------------------------|----------------------------------------------------------------------------------------------------------------------------------------------------------------------------------------------------------------------------------------------------------------------------------------------------------------------------------------------------------|---------------------------------------------------------------------------------------------------------------------------------------------------------------------------------------------------------------------|---------------------------------------------------------------------------------------------------------------------------------------------------------------------------------------------------------------------------------------------------------------------------------------------------------------------------------------------------------------------------------------------------------------------------------------------------------------------------------------------------------------------------------------------------------------------------------------------------------------------------------------------------------------------------|------------------------------------------------------------------------------------------------------------------------------------------------------------------------------------------------------------------------------------------------------------------------------------------------------------------------------------------------------------------------------------------------------|----------------------------------------------------------------------------------------------------------------------------------------------------------------------|------------------------------------------------------------------------------------------------------------------------------------------------------------------------------------------------------------------------------------------------------------------------------------------------------------------------------------------------------------------------------------------------------------------------------------------------------------------------------------------------------------------------------------------------------------------------------------------------------------------|---------------------------------------------------------------------------------------------------------------------------------------------------------------------------------------------------------------------------------------------------------------------------------------------------------------------------------------------|------------------------------------------------------------------------------------------------------------------------------------------------------------------------------------------------------------------------------------------------------------------------------------------------------------------------------------------------------------------------------------------------------------------------------------------------------------------------------------------------|---------------------------------------------------------------------------------------------------------------------------------------------------------|----|---------------------------------------------------------------------------------------------------------------------------------------------------------------------------------------------------------------------------------------------------------------------------------------------------------------------------------------------------------------------------------------------------------------------------------------------------------------------------------------------------------------------------------------------------------------------------------------------------------------------------------------------------------------------------------------------------------------------------------------------------------------------|----------------------------------------------------------------------------------------------------------------------|------------------------------------------------------------------------------------------------------------------------------------------------------------------------------------------------------------------------------------------------------------------------------------------------------------------------------------------------------------------------------------------------------------------------------------------------------------------------------------------------------------------------------------------------------------------------------------------------------------------------------------------------------------------------------------------------------------------------------------------------------------------------------------------------------------------------------------------------------------|------------------------------------------------------------------------------|------------------------------------------------------------------------------------------------------------------------------------------------------------------------------------------------------------------------------------------------------------------------------------------------------------------------------------------------------------------------------------------------------------------------------------------------------------------------------------------------------------------------------------------------------------------------------------------------------------------------------------------------------------------------------------------------------------------------------------------------------------------------------------------------------------------------------------------------------------|
| Connolly S.S.<br>Rochester M.A.                                                                                                                              | Nephroureterecto my surgery in the UK in 2012.<br>British Association of Urological Surgeons (BAUS) Registry data. | 2015 | BAUS Registry data for Nephroureterecto my surgery | Nephroureterecto my surgery | BAUS, Nuvola                                                                                                                                                                                                                                 | BAUS                                                                                                                                                                                                                                                                                                                          | To respond to the government initiative for the compulsory reporting of surgeon-specific outcomes for surgery, the BAUS required urologists performing any nephrectomy surgery in England to enter their data for all such surgery. To provide an accurate description of current practice to facilitate audit of individual surgeon and centre outcomes | Data entry was invited from all urologists within the UK. Data were entered by each individual surgeon's team to a web-based database tool established by the BAUS Section of Oncology and commissioned from Nuvola | Funding from Nuvola                                                                                                                                                                                                                                                                                                                                                                                                                                                                                                                                                                                                                                                       | At the outset of this report it was noted that data were very limited in relation to tumour location, preoperative diagnostic evaluation and precise details of the MIS undertaken. It is hoped that this will be addressed in future modifications of the database. Data on long-term and oncological outcomes were also not adequate - it is hoped that these will become available in the future. | Basic demographic details: 59 patient-specific parameters were included                                                                                              | Registry data entered by each individual surgeon's team. Before any formal analysis, a process of data cleansing was undertaken centrally by a BAUS committee to address inconsistencies between the listed surgery and the preoperative indication.                                                                                                                                                                                                                                                                                                                                                             | A few of the data items were mandatory, but there was no obligation to provide complete data. Collected data was under the following themes: (i) Presentation and indication; (ii) Diagnosis and co-morbidity; (iii) Stage of malignancy; (iv) Surgeon; (v) Details of procedure; (vi) Outcome and complications; and (vii) Histopathology. | Entry of data to the database was made available to all urologists within the UK. 6042 nephrectomy surgeries reported to BAUS in 2012, there is no requirement for urologists in England to have membership of BAUS, there is no other similar national organisation within the UK. It is thought that the data for nephrectomy surgery gathered by the BAUS encompasses >80% of all such surgery performed in the UK in 2012, representing a substantial strength of the present publication. | Annual Reports                                                                                                                                          | NS | Some cases performed within the private healthcare system may have eluded reporting in this dataset, but there is no reasonable evidence to suggest that this introduced significant bias.                                                                                                                                                                                                                                                                                                                                                                                                                                                                                                                                                                          | The registry offers considerable insight into current practice patterns surrounding NU surgery within the UK in 2012 | NS                                                                                                                                                                                                                                                                                                                                                                                                                                                                                                                                                                                                                                                                                                                                                                                                                                                         | Access to this database was provided by the BAUS and was password privileged |                                                                                                                                                                                                                                                                                                                                                                                                                                                                                                                                                                                                                                                                                                                                                                                                                                                            |
| Caskey F.<br>Castledine C.<br>Dawson A.<br>Farrington K.<br>Fogarty D.<br>Fraser S.<br>Kurwenda M.<br>MacPhee I.<br>Sinha MD.<br>Steenkamp R.<br>Williams AJ | UK Renal Registry - Eighteenth Annual Report                                                                       | 2015 | UK Renal Registry                                  | Renal surgery               | Renal Association, The Scottish Renal Registry, The British Association of Paediatric Nephrology, PatientView, The UK Registry for Rare Kidney Diseases (RaDeR), The Northern Ireland Nephrology Forum and The Welsh Renal Clinical Network. | The UKRR reports directly into the Renal Information Governance Board (RIGB) of the Renal Association. From the beginning, the management committees had representatives from the British Paediatric Nephrologists (BAPN), the British Transplant Society (BTS), the Scottish Renal Registry (SRR) and patient organisations. | To facilitate improvements in patient care by auditing against national standards and supporting research, innovation and quality improvement.                                                                                                                                                                                                           | The UK Renal Registry (UKRR) was established by the Renal Association in 1995 as a resource for the development of patient care in renal disease                                                                    | Initially funded by the Department of Health and industry (1995), but within two years was financially independent of both. It is now principally funded through an annual capitation fee levied on renal replacement therapy (RRT) patients; this currently (2016) stands at £27.50 per patient in England and £22.50 in Wales and Northern Ireland, levied as separate fees for the UKRR and PatientView on dialysis and transplant patients and representing less than 0.08% of the average annual cost of treating these patients. Some projects and collaborations receive funding through linkages with other organisations or grants for research and development. | The idea of the dataset is to give a complete picture of every renal patient-demographics, comorbidity, test results, renal replacement therapy (RRT) and medication                                                                                                                                                                                                                                 | The idea of the dataset is to give a complete picture of every renal patient-demographics, comorbidity, test results, renal replacement therapy (RRT) and medication | Data are collected on a quarterly basis via an automatic download from renal unit databases. Work with partners to ensure accurate extraction of data from NHS IT systems. They work with academics and others to ensure analysis is robust and accurate. Ensuring quality assurance and quality improvement is built into all aspects of the registry. The registry can capture real-time data from renal centres. The UKRR and the Health and Social Care Information Centre (HSCIC) have agreed that there could be considerable benefits for patients from routine linkage with Hospital Episode Statistics. | High quality clinical databases open to requests from researchers. Participation is mandated in England through the NHS National Service Specification and the Chief Executive of each Trust is responsible for adherence to this contract.                                                                                                 | UKRR collects, analyses and reports on data from 71 adult and 13 paediatric renal centres                                                                                                                                                                                                                                                                                                                                                                                                      | Annual reports in a form that are easily accessible to patients, clinicians, commissioners, policy makers and anyone with an interest in renal disease. | NS | There is a Patient Council that Act as representatives for kidney patients and their carers. Guide and influence methods of delivery of care; Advise on opportunities for new work ideas and initiatives for the UK Renal Registry (UKRR); Contribute to the development of new audit, research and survey proposals; Provide an arena that will encourage discussions between population health and clinical teams to promote patient involvement at renal centre, regional and national levels; Monitor and review patient facing initiatives recommended by the Department of Health; Review applications and contribute towards the production of patient leaflets, posters, reports and other patient information products developed by the Renal Association; | NS                                                                                                                   | Registries can improve the health of the population in many ways. Their data can be used to generate and refine hypotheses that require testing, to inform optimal study design, to provide the evidence of need for the research to help secure funding, to provide an efficient framework for sampling and data collection in trials, to track changes in practice and finally and most importantly to monitor changes in population health outcomes. The registry is able to support an efficient randomised controlled trial (SIMPLIFIED) by providing daily feeds of laboratory data for patients consented into the trial. All follow up for the trial is being carried out remotely with linkage to routine databases. The trial is called SIMPLIFIED and tests the hypothesis that ordinary vitamin D given to dialysis patients reduces all-cause | NS                                                                           | The UK Renal Registry is part of the Renal Association, a not for profit organisation registered with the Charity Commission. They try to ensure that all data are extracted, stored and used in line with good information governance and Caldicott principles. Permissions for the UKRR to undertake research and linkage with data have had to be established and it has become clear that research ethics committee approval is needed for all work that is not audit or quality assurance. The registry approves a number of requests for data sharing. Data are shared for specific analyses only and securely destroyed at the end of the agreed period. The UKRR operates within a comprehensive governance framework which concerns data handling, reporting and research, including data linkages and sharing agreements. The UKRR has temporary |

1  
2  
3  
4  
5  
6  
7  
8  
9  
10  
11  
12  
13  
14  
15  
16  
17  
18  
19  
20  
21  
22  
23  
24  
25  
26<sup>8</sup>  
27  
28  
29  
30  
31  
32  
33  
34  
35  
36  
37  
38  
39  
40  
41  
42  
43  
44  
45  
46  
47  
48  
49

|               |                                                                                                                     |      |                         |             |    |    |                                                                                                                |    |    |    |    |                                                                                                                                                                                                                                                                                                                                                                                                                                                                                                                                                                                                                                                                                                                        |    |                                                                                                                                                                                                                                                                                                                                                                                                                                                                                                                                                                                                                                                                                                      |    |    |    |                                                                                                      |    |    |  |
|---------------|---------------------------------------------------------------------------------------------------------------------|------|-------------------------|-------------|----|----|----------------------------------------------------------------------------------------------------------------|----|----|----|----|------------------------------------------------------------------------------------------------------------------------------------------------------------------------------------------------------------------------------------------------------------------------------------------------------------------------------------------------------------------------------------------------------------------------------------------------------------------------------------------------------------------------------------------------------------------------------------------------------------------------------------------------------------------------------------------------------------------------|----|------------------------------------------------------------------------------------------------------------------------------------------------------------------------------------------------------------------------------------------------------------------------------------------------------------------------------------------------------------------------------------------------------------------------------------------------------------------------------------------------------------------------------------------------------------------------------------------------------------------------------------------------------------------------------------------------------|----|----|----|------------------------------------------------------------------------------------------------------|----|----|--|
| Sabah S.A.    | Are all metal-on-metal hip revision operations contributing to the National Joint Registry implant survival curves? | 2016 | National Joint Registry | Hip surgery | NS | NS | To examine the data quality of the NJR and to validate data quality on metal-on-metal hip revision procedures. | NS | NS | NS | NS | This study showed that only one third of retrieved components at the London Implant Retrieval Centre, contributed to survival curves on the NJR, this suggests that current NJR data on failure rates may be vulnerable to missing data. The most likely explanation for this appears to be the poor rate of consent, compliance and linkability during the early years of the NJR. The authors recommend that the NJR provide outcome data only for the periods where it has achieved excellent data collection. They also advocate for registry retrieval linkage to become an integral component of the NJR Data Quality Strategy - this would enable feedback on errors and missing data and improve data quality. | NS | This study showed that only one third of retrieved components at the London Implant Retrieval Centre, contributed to survival curves on the NJR, this suggests that current NJR data on failure rates may be vulnerable to missing data. The most likely explanation for this appears to be the poor rate of consent, compliance and linkability during the early years of the NJR. They found that for the procedures the NJR did record, data quality was excellent. There was no missing data for surgical unit, date of revision, procedure type and implant side. This reflects the engagement from surgeons and Hospital Data Managers and the high quality of the NJR database infrastructure | NS | NS | NS | Large data sets are very helpful for planning provision of health care and to study disease patterns | NS | NS |  |
| Henckel J.    |                                                                                                                     |      |                         |             |    |    |                                                                                                                |    |    |    |    |                                                                                                                                                                                                                                                                                                                                                                                                                                                                                                                                                                                                                                                                                                                        |    |                                                                                                                                                                                                                                                                                                                                                                                                                                                                                                                                                                                                                                                                                                      |    |    |    |                                                                                                      |    |    |  |
| Koutsouris S. |                                                                                                                     |      |                         |             |    |    |                                                                                                                |    |    |    |    |                                                                                                                                                                                                                                                                                                                                                                                                                                                                                                                                                                                                                                                                                                                        |    |                                                                                                                                                                                                                                                                                                                                                                                                                                                                                                                                                                                                                                                                                                      |    |    |    |                                                                                                      |    |    |  |
| Rajani R.     |                                                                                                                     |      |                         |             |    |    |                                                                                                                |    |    |    |    |                                                                                                                                                                                                                                                                                                                                                                                                                                                                                                                                                                                                                                                                                                                        |    |                                                                                                                                                                                                                                                                                                                                                                                                                                                                                                                                                                                                                                                                                                      |    |    |    |                                                                                                      |    |    |  |
| Hothi H.      |                                                                                                                     |      |                         |             |    |    |                                                                                                                |    |    |    |    |                                                                                                                                                                                                                                                                                                                                                                                                                                                                                                                                                                                                                                                                                                                        |    |                                                                                                                                                                                                                                                                                                                                                                                                                                                                                                                                                                                                                                                                                                      |    |    |    |                                                                                                      |    |    |  |
| Skinner J.A.  |                                                                                                                     |      |                         |             |    |    |                                                                                                                |    |    |    |    |                                                                                                                                                                                                                                                                                                                                                                                                                                                                                                                                                                                                                                                                                                                        |    |                                                                                                                                                                                                                                                                                                                                                                                                                                                                                                                                                                                                                                                                                                      |    |    |    |                                                                                                      |    |    |  |
| Hart A.J.     |                                                                                                                     |      |                         |             |    |    |                                                                                                                |    |    |    |    |                                                                                                                                                                                                                                                                                                                                                                                                                                                                                                                                                                                                                                                                                                                        |    |                                                                                                                                                                                                                                                                                                                                                                                                                                                                                                                                                                                                                                                                                                      |    |    |    |                                                                                                      |    |    |  |

Support the UK in issues relating to information governance and patient consent. Use personal networks to spread awareness of the UKRR and its work with the council; Occasionally represent the Patient Council and the UKRR at other external meetings.

mortality. In the last year the registry has been a co-applicant on four grant applications

exemption, granted by the Secretary of State for Health under section 251 of The National Health Service Act (2006), to hold patient identifiable data. This exemption is reviewed annually. The UKRR has successfully completed the Connecting for Health information governance toolkit to a satisfactory standard





statistically adjust for case-mix. Another factor is that surgical outcomes are not solely dependent on the consultant as other members of the operating team also contribute. It is thus important that team-level data are published as well to reflect the complex interplay of the multi-disciplinary team. The benefits of reporting patient outcomes seem to outweigh the disadvantages, and they should be published.

|              |                                                                                  |      |                        |                |                                                                                                                                 |                        |                                                                                                                                                                                                       |                                                                                                                                                                                                                                                                                                                             |                                                                                                                                                      |                                                                                                                                                                                                                                                                                                                                               |                                                                                                                                                                                                                                                                     |                                                                                                                                                                                                                                                                                                                                                                                                                                                                                                                                                                                        |                                                                                                                                                                                                                                                                                                                                                                                                                                                                                                                                                                                                                                                                                                                                                                                                                                                                                                                                                                                                                                                 |    |                                                                                                                                                                                                                                                   |                                                                                                                                                                                                                                                                                                                                                                                                                                                                                                                                                                                                                                                                                                                                                                                                                                                                                                                                                      |                                                                                                                                                                                                                                                                                                                                                                                                                                                                                                                                                                                                                                                                               |                                                                                                                                                                                                                                                                                                    |                                                                                                                                                                                                                                                                      |
|--------------|----------------------------------------------------------------------------------|------|------------------------|----------------|---------------------------------------------------------------------------------------------------------------------------------|------------------------|-------------------------------------------------------------------------------------------------------------------------------------------------------------------------------------------------------|-----------------------------------------------------------------------------------------------------------------------------------------------------------------------------------------------------------------------------------------------------------------------------------------------------------------------------|------------------------------------------------------------------------------------------------------------------------------------------------------|-----------------------------------------------------------------------------------------------------------------------------------------------------------------------------------------------------------------------------------------------------------------------------------------------------------------------------------------------|---------------------------------------------------------------------------------------------------------------------------------------------------------------------------------------------------------------------------------------------------------------------|----------------------------------------------------------------------------------------------------------------------------------------------------------------------------------------------------------------------------------------------------------------------------------------------------------------------------------------------------------------------------------------------------------------------------------------------------------------------------------------------------------------------------------------------------------------------------------------|-------------------------------------------------------------------------------------------------------------------------------------------------------------------------------------------------------------------------------------------------------------------------------------------------------------------------------------------------------------------------------------------------------------------------------------------------------------------------------------------------------------------------------------------------------------------------------------------------------------------------------------------------------------------------------------------------------------------------------------------------------------------------------------------------------------------------------------------------------------------------------------------------------------------------------------------------------------------------------------------------------------------------------------------------|----|---------------------------------------------------------------------------------------------------------------------------------------------------------------------------------------------------------------------------------------------------|------------------------------------------------------------------------------------------------------------------------------------------------------------------------------------------------------------------------------------------------------------------------------------------------------------------------------------------------------------------------------------------------------------------------------------------------------------------------------------------------------------------------------------------------------------------------------------------------------------------------------------------------------------------------------------------------------------------------------------------------------------------------------------------------------------------------------------------------------------------------------------------------------------------------------------------------------|-------------------------------------------------------------------------------------------------------------------------------------------------------------------------------------------------------------------------------------------------------------------------------------------------------------------------------------------------------------------------------------------------------------------------------------------------------------------------------------------------------------------------------------------------------------------------------------------------------------------------------------------------------------------------------|----------------------------------------------------------------------------------------------------------------------------------------------------------------------------------------------------------------------------------------------------------------------------------------------------|----------------------------------------------------------------------------------------------------------------------------------------------------------------------------------------------------------------------------------------------------------------------|
| Breakwell LM | Should we all go to the PROM? The first two years of the British Spine Registry. | 2015 | British Spine Register | Spinal surgery | The British Association of Spine Surgeons, the British Scoliosis Society (BSS) and the Society of British Neurological Surgeons | BSR Steering Committee | The purpose of the BSR is to collate information on the current state of spinal surgery within the United Kingdom in order to identify areas of best practice and so facilitate improved patient care | The British Association of Spine Surgeons instituted the design, construction and rollout of the British Spine Registry. The BSR, built on the Amplitude platform, (Amplitude Clinical, Droitwich, Worcestershire) was constructed to be a secure Internet based repository freely available to the societies' memberships. | Recent funding support from NHS England. Recurring funding to ensure expansion of the Registry is being sought independently of the spine societies. | Collection of outcome measures after surgery, including patient reported scores is central to the function of the BSR. To give a more reliable overview of current spinal activity in the United Kingdom a mandatory dataset has been determined. The BSR team decided to collect PROMs for specific procedures at predetermined time points. | The standard patient questionnaires will include the EuroQoL EQ-5D,26 a visual analogue score for back and leg pain and the Oswestry Disability Index. A satisfaction assessment akin to the Friends and Family tool will also be used at the final follow-up stage | The surgical team can enter scores retrospectively after paper form collection or the data can be entered prospectively by the patient themselves either via an email portal, a personal computer, a tablet or a smartphone while the patient is in outpatients. The BSR is in discussion with NHS England, the National Institute for Health and Care Excellence, HQIP, the Private Healthcare Information Network and the Association of British Healthcare Industries, amongst others, to enshrine the BSR as the central resource for spinal surgical data for the United Kingdom. | Until mandatory status is achieved, it is unlikely the true value of the BSR will be realised. At present, this is largely beyond the direct control of the Spine Societies, but progress made through the British Orthopaedic Association's Quality Outcomes Committee. Since 2009 it has been a mandatory requirement for all facilities providing care to NHS patients undergoing hip and knee arthroplasty, groin hernia repair and varicose vein surgery to participate in the national PROMs programmes. The BSR has been designed to enable multiple modes of capture, either by secure email, or via touchscreen input on a tablet or kiosk computer while the patient is in outpatients, which should reduce questionnaire fatigue. Support is needed from NHS trusts and private providers that offer NHS treatment in terms of recognition of the time and logistical requirements of capturing this type of data on large numbers of patients. Need the support and input of the appropriate stakeholders. Raising awareness of the | NS | Data can be entered prospectively by the patient themselves either via an email portal, a personal computer, a tablet or a smartphone while the patient is in outpatients. Over 12,000 forms have been directly submitted by patients themselves. | There are difficulties around the recording of outcomes following spinal interventions, often because of the heterogeneous nature of the conditions being treated, as well as the significant psychosocial component of patients' presentations. It is uncertain whether the validated and widely accepted generic and disease-specific tools that are currently in use truly discriminate between good and bad operations. In some circumstances they have been shown to be inadequate. Limited outcomes tools may not be able to express fully the true extent of the patient's experience, but they are a start. Practical problems remain with regard to the collection of data, including patient engagement. Many units struggle to facilitate data entry due to the pressures of numbers in clinics and poor infrastructure investment at hospital level. The funding to enable collection is limited, despite the national mandate to do so. | Allow comparison of unit level results such as deep infection rates in scoliosis correction surgery. NHS trusts in England are already obliged to provide PROMS outcomes for surgery, but this has been implemented in a patchy and haphazard manner - the BSR is a valuable resource that would allow a systematic implementation of this policy. SR already gives a national picture of spinal surgery including case mix, volumes and trends, which informs debate and policy making. An additional intention of the design is to facilitate national research via multicentre trials supported by a low-cost data capture system that is secure, reliable and accessible. | Registry can be defined as 'a systematic collection of a clearly defined set of health and demographic data for patients with specific health characteristics, held in a central database for a predefined purpose'. Registries have limited value unless the data entry is relevant and complete. | Secure Internet based repository. Currently, surgeons and their teams, under the auspices of the Societies, own and control the data on the BSR - this should ensure the accuracy and reliability of such information with specific reference to the surgical detail |
|--------------|----------------------------------------------------------------------------------|------|------------------------|----------------|---------------------------------------------------------------------------------------------------------------------------------|------------------------|-------------------------------------------------------------------------------------------------------------------------------------------------------------------------------------------------------|-----------------------------------------------------------------------------------------------------------------------------------------------------------------------------------------------------------------------------------------------------------------------------------------------------------------------------|------------------------------------------------------------------------------------------------------------------------------------------------------|-----------------------------------------------------------------------------------------------------------------------------------------------------------------------------------------------------------------------------------------------------------------------------------------------------------------------------------------------|---------------------------------------------------------------------------------------------------------------------------------------------------------------------------------------------------------------------------------------------------------------------|----------------------------------------------------------------------------------------------------------------------------------------------------------------------------------------------------------------------------------------------------------------------------------------------------------------------------------------------------------------------------------------------------------------------------------------------------------------------------------------------------------------------------------------------------------------------------------------|-------------------------------------------------------------------------------------------------------------------------------------------------------------------------------------------------------------------------------------------------------------------------------------------------------------------------------------------------------------------------------------------------------------------------------------------------------------------------------------------------------------------------------------------------------------------------------------------------------------------------------------------------------------------------------------------------------------------------------------------------------------------------------------------------------------------------------------------------------------------------------------------------------------------------------------------------------------------------------------------------------------------------------------------------|----|---------------------------------------------------------------------------------------------------------------------------------------------------------------------------------------------------------------------------------------------------|------------------------------------------------------------------------------------------------------------------------------------------------------------------------------------------------------------------------------------------------------------------------------------------------------------------------------------------------------------------------------------------------------------------------------------------------------------------------------------------------------------------------------------------------------------------------------------------------------------------------------------------------------------------------------------------------------------------------------------------------------------------------------------------------------------------------------------------------------------------------------------------------------------------------------------------------------|-------------------------------------------------------------------------------------------------------------------------------------------------------------------------------------------------------------------------------------------------------------------------------------------------------------------------------------------------------------------------------------------------------------------------------------------------------------------------------------------------------------------------------------------------------------------------------------------------------------------------------------------------------------------------------|----------------------------------------------------------------------------------------------------------------------------------------------------------------------------------------------------------------------------------------------------------------------------------------------------|----------------------------------------------------------------------------------------------------------------------------------------------------------------------------------------------------------------------------------------------------------------------|

1  
2  
3  
4  
5  
6  
7  
8  
9  
10  
11  
12  
13  
14  
15  
16  
17  
18  
19  
20  
21  
22  
23  
24  
25  
26  
27  
28  
29  
30  
31  
32  
33  
34  
35  
36  
37  
38  
39  
40  
41  
42  
43  
44  
45  
46  
47  
48  
49

1  
2  
3  
4  
5  
6  
7  
8  
9  
10  
11  
12  
13  
14  
15  
16  
17  
18  
19  
20  
21  
22  
23  
24  
25  
26  
27  
28  
29  
30  
31  
32  
33  
34  
35  
36  
37  
38  
39  
40  
41  
42  
43  
44  
45  
46  
47  
48  
49

registry is vital through wider publicity. Currently, surgeons and their teams, under the auspices of the Societies, own and control the data on the BSR - this should ensure the accuracy and reliability of such information with specific reference to the surgical detail

|           |           |      |           |         |                                                                                                  |    |                        |                                                                                                                                                                                                                                          |             |    |                                                                                                                                                                                                                                                                                                                                                                                                                                                                                                                                                                                                                                                                                                                                                                                                          |                                                               |                                                                                                                                                                                                                                                                                                                                                                                                                                                                                                                                                                                                                               |                                                                                                                                        |                                             |    |    |                                                                                                                                                                                                                                                                                          |    |                                                                                                                                                                                                                                                                                                                                                                                                                              |
|-----------|-----------|------|-----------|---------|--------------------------------------------------------------------------------------------------|----|------------------------|------------------------------------------------------------------------------------------------------------------------------------------------------------------------------------------------------------------------------------------|-------------|----|----------------------------------------------------------------------------------------------------------------------------------------------------------------------------------------------------------------------------------------------------------------------------------------------------------------------------------------------------------------------------------------------------------------------------------------------------------------------------------------------------------------------------------------------------------------------------------------------------------------------------------------------------------------------------------------------------------------------------------------------------------------------------------------------------------|---------------------------------------------------------------|-------------------------------------------------------------------------------------------------------------------------------------------------------------------------------------------------------------------------------------------------------------------------------------------------------------------------------------------------------------------------------------------------------------------------------------------------------------------------------------------------------------------------------------------------------------------------------------------------------------------------------|----------------------------------------------------------------------------------------------------------------------------------------|---------------------------------------------|----|----|------------------------------------------------------------------------------------------------------------------------------------------------------------------------------------------------------------------------------------------------------------------------------------------|----|------------------------------------------------------------------------------------------------------------------------------------------------------------------------------------------------------------------------------------------------------------------------------------------------------------------------------------------------------------------------------------------------------------------------------|
| AuditData | AuditBase | 2016 | AuditBase | Otology | Six expert implant teams in England, Scotland and Wales have given input to develop the database | NS | To increase efficiency | User-friendly and easy to navigate. Integrates all audiology disciplines in one system for maximum flexibility and resource management. Six expert implant teams in England, Scotland and Wales have given input to develop the database | Self funded | NS | Patient demographics, GP information, medical background, Pre-op assessment, contact details, baseline hearing (audiograms and other hearing tests), date of surgery, Ear side, surgical approach, implant details, surgical consent including date, Pre and post operative information, surgical information, 2 to 5 months after surgery , over one year after surgery, recording patient drop out, air conduction, bone conduction, air-bone-gap, graphical overlay of audiograms, visual indicator of Belfast rule of thumb success, Histograms of trends in air and bone means over extended periods, OAE, ABR and CERA measurements, 32 speech and language and speech discrimination tests summary score screens, name of clinician, CT/MRI scans, patient questionnaires regarding their results | Advanced connectivity between AuditBase and Hospital systems. | Data is easy to access, user-friendly and easy to navigate. Integrates all audiology disciplines in one system for maximum flexibility and resource management. Core data entry forms. A checklist to ensure that all the necessary steps have been completed, easy access to data for research purposes, can use the registry from remote (off-site) locations, allows complete exporting of data to Excel, has built in patient reports with hearing results. Helps you send letters to patients and healthcare professionals. Can also be used to send mobile phone text reminders to patients for clinics and operations. | Used in more than 80% of all hospital audiology clinics in the UK and Scandinavia. More than 4500 users in over 500 audiology clinics. | The system helps you generate audit reports | NS | NS | Enables you to plan and easily visualise a patients pathway. It can help you keep control of expenditure and gain funds from commissioners. Gives you information on patient preferences. Helps you report data. Helps you manage stock levels and help with managing purchase ordering. | NS | AuditBase is CE-marked as a medical device (class I) under the EU Medical Device Directive. It is registered with the UK ICO- Information Commissioners Office (required by the Data Protection Act), N3 and ISO 27001 (information security) certified. Completed the NHS Information Governance Statement of Complicance and therefore comply with all legal requirements of the NHS to safeguard patient confidentiality. |
|-----------|-----------|------|-----------|---------|--------------------------------------------------------------------------------------------------|----|------------------------|------------------------------------------------------------------------------------------------------------------------------------------------------------------------------------------------------------------------------------------|-------------|----|----------------------------------------------------------------------------------------------------------------------------------------------------------------------------------------------------------------------------------------------------------------------------------------------------------------------------------------------------------------------------------------------------------------------------------------------------------------------------------------------------------------------------------------------------------------------------------------------------------------------------------------------------------------------------------------------------------------------------------------------------------------------------------------------------------|---------------------------------------------------------------|-------------------------------------------------------------------------------------------------------------------------------------------------------------------------------------------------------------------------------------------------------------------------------------------------------------------------------------------------------------------------------------------------------------------------------------------------------------------------------------------------------------------------------------------------------------------------------------------------------------------------------|----------------------------------------------------------------------------------------------------------------------------------------|---------------------------------------------|----|----|------------------------------------------------------------------------------------------------------------------------------------------------------------------------------------------------------------------------------------------------------------------------------------------|----|------------------------------------------------------------------------------------------------------------------------------------------------------------------------------------------------------------------------------------------------------------------------------------------------------------------------------------------------------------------------------------------------------------------------------|

|   |                                                                                                                                        |                                    |      |                                 |         |                                                                                                                                                                                                                                                                                                                |    |                                                                                                                                                                                                                                                                                                                                                                                                                                                                                                                                                                                                                                                                                                                                                                                                                                                                                                                                                                                                                                               |    |                                                                                                                                                                                                                                                                                                                                                                                                                                                                                                                                                                                                                                   |    |                                                                                                                                                      |                                                                                                                                                                                                                                                                                                                                                                                                                                                                                                                                                                                                                                                                    |                                                                                                                                                                                                                                                                                                                                                                                                                                                                                                          |                                                                                                                                                                                                                                                                                                                                                                                                                                                                                     |    |                                                                                                            |    |    |                                                                                                                                                                                                                                                                                                                                                                                                                                                                                                                        |    |                                                                                                                                                                                                                                                                                                                                                                                             |
|---|----------------------------------------------------------------------------------------------------------------------------------------|------------------------------------|------|---------------------------------|---------|----------------------------------------------------------------------------------------------------------------------------------------------------------------------------------------------------------------------------------------------------------------------------------------------------------------|----|-----------------------------------------------------------------------------------------------------------------------------------------------------------------------------------------------------------------------------------------------------------------------------------------------------------------------------------------------------------------------------------------------------------------------------------------------------------------------------------------------------------------------------------------------------------------------------------------------------------------------------------------------------------------------------------------------------------------------------------------------------------------------------------------------------------------------------------------------------------------------------------------------------------------------------------------------------------------------------------------------------------------------------------------------|----|-----------------------------------------------------------------------------------------------------------------------------------------------------------------------------------------------------------------------------------------------------------------------------------------------------------------------------------------------------------------------------------------------------------------------------------------------------------------------------------------------------------------------------------------------------------------------------------------------------------------------------------|----|------------------------------------------------------------------------------------------------------------------------------------------------------|--------------------------------------------------------------------------------------------------------------------------------------------------------------------------------------------------------------------------------------------------------------------------------------------------------------------------------------------------------------------------------------------------------------------------------------------------------------------------------------------------------------------------------------------------------------------------------------------------------------------------------------------------------------------|----------------------------------------------------------------------------------------------------------------------------------------------------------------------------------------------------------------------------------------------------------------------------------------------------------------------------------------------------------------------------------------------------------------------------------------------------------------------------------------------------------|-------------------------------------------------------------------------------------------------------------------------------------------------------------------------------------------------------------------------------------------------------------------------------------------------------------------------------------------------------------------------------------------------------------------------------------------------------------------------------------|----|------------------------------------------------------------------------------------------------------------|----|----|------------------------------------------------------------------------------------------------------------------------------------------------------------------------------------------------------------------------------------------------------------------------------------------------------------------------------------------------------------------------------------------------------------------------------------------------------------------------------------------------------------------------|----|---------------------------------------------------------------------------------------------------------------------------------------------------------------------------------------------------------------------------------------------------------------------------------------------------------------------------------------------------------------------------------------------|
| 1 | Yung M, Gjurovic M, Haeusler R, Van de Heyning PH, Martin C, Swan IR, Tange RA, Huy PT, European Otolaryngology Database Project Group | An international otology database. | 2005 | International otology database. | Otology | A working party of 27 otologists from 12 countries in Europe has already agreed on the content of a common ear database. The project group members include otologists from the United Kingdom, Belgium, Switzerland, France, Germany, Croatia, Holland, Sweden, Poland, Slovak Republic, Denmark, and Hungary. | NS | This paper proposes an International Otology Database. The aims of the project are: To identify common otology audit data among clinicians. To provide an information technology system to store otology data for clinicians. To create a large database that allows statistical analysis to be made on various otologic interventions with sufficient power. To produce standards or benchmarks for comparative audit. The web-based system can be a useful learning tool for surgeons because it gives almost real-time feedback to the individual surgeon. This enables clinicians to monitor their own surgical practice against these standards. The Surgical Training Committee can even use it as a tool to implement competency-based training for surgical trainees; The system provides the mechanism for hospitals or clinicians to collaborate in clinical trials using the common data input methodology. The ultimate goal of the proposed project is to provide primary potential research data that is lacking at the moment. | NS | Web-based, prospective data entry. The data entry is either by tick boxes or selections from drop-down boxes. Input errors are validated using information technology techniques to make sure that all data fields are completed. There should be international consensus on the content of the proposed database. A working party of 27 otologists from 12 countries in Europe has already agreed on the content of a common ear database. The project group members include otologists from the United Kingdom, Belgium, Switzerland, France, Germany, Croatia, Holland, Sweden, Poland, Slovak Republic, Denmark, and Hungary. | NS | There should be international consensus on the content of the proposed database. The system must be user-friendly, in both data input and retrieval. | Patient details, proposed operation date, pre-operative symptoms, aim of surgery, risk factors, audiogram results, operative findings, operative details (approach, materials used), complications, pathology results, audiogram, follow-up intervals, main outcomes, free text for comments. Two levels of data entry are available: Level 1 (a minimum otology database); This is designed for general otolaryngologists and surgical trainees. Only main surgical outcomes are recorded. Level 2 (a comprehensive database); This is designed for dedicated otologists. Detailed information on pathologies, risk factors, and surgical procedure are recorded. | Input errors are validated using information technology techniques to make sure that all data fields are completed. Bias reporting or incorrect data entry will contaminate the quality of the "benchmarking database." Therefore, validation of input data is important. This can be done by site visit of each hospital by an external inspector/auditor (another user of the web-based system) to perform random inspection of patient records. Data used as a benchmark or 'standards' are validated | Users of the database should not be exclusive to a few selected otologists. The otology audit system is available to any surgeons who perform middle ear operation in Europe. Every data field on the data entry form needs to be completed before the form is accepted by the website, thus ensuring completeness of data entry. The data entry is either by tick boxes or selections from drop-down boxes. Pilot the registry. The registry needs to be easy to use and flexible. | NS | The identity of surgeon and patient must remain anonymous. Outcome data used for benchmarking is validated | NS | NS | Help drive evidence based medicine, helps produce standards or benchmarks for comparative audit between surgeons and centres, provide real time feedback to the individual surgeon, help develop standards for surgical training, helps provide evidence of quality assurance, helps with commissioning, helps with surgical self audit. Allows statistical analysis to be made on various otologic interventions with sufficient power owing to large amounts of data, helps facilitate clinical trials and research. | NS | Each surgeon is allocated an access code and a password. They can change their own password once they log in. The identities of the patients and the surgeons are anonymous. Each hospital would be given a Hospital Code Number and each surgeon a Surgeon Code Number. Each patient is identified on the database with an encrypted Patient Code Number created by the individual surgeon |
|---|----------------------------------------------------------------------------------------------------------------------------------------|------------------------------------|------|---------------------------------|---------|----------------------------------------------------------------------------------------------------------------------------------------------------------------------------------------------------------------------------------------------------------------------------------------------------------------|----|-----------------------------------------------------------------------------------------------------------------------------------------------------------------------------------------------------------------------------------------------------------------------------------------------------------------------------------------------------------------------------------------------------------------------------------------------------------------------------------------------------------------------------------------------------------------------------------------------------------------------------------------------------------------------------------------------------------------------------------------------------------------------------------------------------------------------------------------------------------------------------------------------------------------------------------------------------------------------------------------------------------------------------------------------|----|-----------------------------------------------------------------------------------------------------------------------------------------------------------------------------------------------------------------------------------------------------------------------------------------------------------------------------------------------------------------------------------------------------------------------------------------------------------------------------------------------------------------------------------------------------------------------------------------------------------------------------------|----|------------------------------------------------------------------------------------------------------------------------------------------------------|--------------------------------------------------------------------------------------------------------------------------------------------------------------------------------------------------------------------------------------------------------------------------------------------------------------------------------------------------------------------------------------------------------------------------------------------------------------------------------------------------------------------------------------------------------------------------------------------------------------------------------------------------------------------|----------------------------------------------------------------------------------------------------------------------------------------------------------------------------------------------------------------------------------------------------------------------------------------------------------------------------------------------------------------------------------------------------------------------------------------------------------------------------------------------------------|-------------------------------------------------------------------------------------------------------------------------------------------------------------------------------------------------------------------------------------------------------------------------------------------------------------------------------------------------------------------------------------------------------------------------------------------------------------------------------------|----|------------------------------------------------------------------------------------------------------------|----|----|------------------------------------------------------------------------------------------------------------------------------------------------------------------------------------------------------------------------------------------------------------------------------------------------------------------------------------------------------------------------------------------------------------------------------------------------------------------------------------------------------------------------|----|---------------------------------------------------------------------------------------------------------------------------------------------------------------------------------------------------------------------------------------------------------------------------------------------------------------------------------------------------------------------------------------------|

1  
2  
3  
4  
5  
6  
7  
8  
9  
10  
11  
12  
13  
14  
15  
16  
17  
18  
19  
20  
21  
22  
23  
24  
25  
26  
27  
28  
29  
30  
31  
32  
33  
34  
35  
36  
37  
38  
39  
40  
41  
42  
43  
44  
45  
46  
47  
48  
49

|                                           |                                                          |      |                                                 |                              |                                                                                                                                                                        |                                                                                                             |                                                                                                                                                                                                                                                                                                                                                                                                                                                                                                                                                                                                                                                                                                                                                                                                                                                                                                                                                                                                                                                                                           |    |                                                                                                                                         |                                                                                                                                                                                                                                                                                                                                                                                                                                                                                                                 |                                                                                                                                                                                                                                                                                         |                                                                                                                                                                                                                                                                                                                                                                                                                                                                                         |                                                                                                                                                                                                                                                                                                                                                                                                                                                                                                                                                                                                                                                                    |                                                                                                                                                                                                                                                                                                                                                                                                                                                                                                                                                         |                                                                                                                                                                                                                                                                                                                                                                         |                                                                                                                                                                                                                                                                                                                                                                                                                    |                                                                                                                                                                                      |                                                                                                                                                                                                                                                                                                                                                                                                                             |    |    |                                                                                 |                                                 |                                                                                                                                                                           |
|-------------------------------------------|----------------------------------------------------------|------|-------------------------------------------------|------------------------------|------------------------------------------------------------------------------------------------------------------------------------------------------------------------|-------------------------------------------------------------------------------------------------------------|-------------------------------------------------------------------------------------------------------------------------------------------------------------------------------------------------------------------------------------------------------------------------------------------------------------------------------------------------------------------------------------------------------------------------------------------------------------------------------------------------------------------------------------------------------------------------------------------------------------------------------------------------------------------------------------------------------------------------------------------------------------------------------------------------------------------------------------------------------------------------------------------------------------------------------------------------------------------------------------------------------------------------------------------------------------------------------------------|----|-----------------------------------------------------------------------------------------------------------------------------------------|-----------------------------------------------------------------------------------------------------------------------------------------------------------------------------------------------------------------------------------------------------------------------------------------------------------------------------------------------------------------------------------------------------------------------------------------------------------------------------------------------------------------|-----------------------------------------------------------------------------------------------------------------------------------------------------------------------------------------------------------------------------------------------------------------------------------------|-----------------------------------------------------------------------------------------------------------------------------------------------------------------------------------------------------------------------------------------------------------------------------------------------------------------------------------------------------------------------------------------------------------------------------------------------------------------------------------------|--------------------------------------------------------------------------------------------------------------------------------------------------------------------------------------------------------------------------------------------------------------------------------------------------------------------------------------------------------------------------------------------------------------------------------------------------------------------------------------------------------------------------------------------------------------------------------------------------------------------------------------------------------------------|---------------------------------------------------------------------------------------------------------------------------------------------------------------------------------------------------------------------------------------------------------------------------------------------------------------------------------------------------------------------------------------------------------------------------------------------------------------------------------------------------------------------------------------------------------|-------------------------------------------------------------------------------------------------------------------------------------------------------------------------------------------------------------------------------------------------------------------------------------------------------------------------------------------------------------------------|--------------------------------------------------------------------------------------------------------------------------------------------------------------------------------------------------------------------------------------------------------------------------------------------------------------------------------------------------------------------------------------------------------------------|--------------------------------------------------------------------------------------------------------------------------------------------------------------------------------------|-----------------------------------------------------------------------------------------------------------------------------------------------------------------------------------------------------------------------------------------------------------------------------------------------------------------------------------------------------------------------------------------------------------------------------|----|----|---------------------------------------------------------------------------------|-------------------------------------------------|---------------------------------------------------------------------------------------------------------------------------------------------------------------------------|
| Yung M, Heyning P                         | A Prospective Multicentre Otolaryngology Database        | 2007 | Prospective Multicentre Otolaryngology Database | Otolaryngology               | There should be international consensus on the content of the proposed database                                                                                        | NS                                                                                                          | Aim of the project is to create an interactive otology database for surgeons in the UK and Europe. The aims of the project are: To identify common otology audit data among clinicians; To provide an information technology system to store otology data for clinicians; To create a large database that allows statistical analysis to be made on various otologic interventions with sufficient power; To produce standards or benchmarks for comparative audit. The web-based system can be a useful learning tool for surgeons because it gives almost real-time feedback to the individual surgeon. This enables clinicians to monitor their own surgical practice against these standards. The Surgical Training Committee can even use it as a tool to implement competency-based training for surgical trainees. The system provides the mechanism for hospitals or clinicians to collaborate in clinical trials using the common data input methodology. The ultimate goal of the proposed project is to provide primary potential research data that is lacking at the moment. | NS | NS                                                                                                                                      | There should be international consensus on the content of the proposed database. The system must be user-friendly, both in data input and retrieval. A working party of international otologists from 11 countries has already agreed on the content of a common ear database. Web-based and prospective. Piloting the registry is useful for user feedback.                                                                                                                                                    | NS                                                                                                                                                                                                                                                                                      | NS                                                                                                                                                                                                                                                                                                                                                                                                                                                                                      | Patient details, proposed operation date, pre-operative symptoms, aim of surgery, risk factors, audiogram results, operative findings, operative details (approach, materials used), complications, pathology results, audiogram, follow up intervals, main outcomes, free text for comments. Two levels of data entry are available: Level 1 (a minimum otology database). This is designed for general otolaryngologists and surgical trainees. Only main surgical outcomes are recorded. Level 2 (a comprehensive database). This is designed for dedicated otologists. Detailed information on pathologies, risk factors, and surgical procedure are recorded. | Data used as a benchmark or 'standards' are validated. The methodology requires surgeons to put in pre-operative data on all patients scheduled for ear surgery, thus eliminating bias from selective reporting of operations. Validation of data can be done by site visit of each hospital by an external inspector/auditor (another user of the web-based system) to perform random inspection of patient records. The benefit of using peers to validate data from each centre gives a further opportunity for clinicians to learn from each other. | The system must be user-friendly, both in data input and retrieval. The database should not be exclusive to a few selected otologists. Every field on the data form needs to be completed before the form is accepted, thus ensuring completeness of data entry. Each surgeon can download his surgical results from the website into an Excel file in almost real time | NS                                                                                                                                                                                                                                                                                                                                                                                                                 | NS                                                                                                                                                                                   | The identity of surgeon and patient must remain anonymous; data used as a benchmark or 'standards' are validated                                                                                                                                                                                                                                                                                                            | NS | NS | To help facilitate comparisons and establish standards. To facilitate research. | Help generate data quickly for clinical trials. | The identity of surgeon and patient must remain anonymous. Each surgeon is allocated an access code and a password. Data will be owned by all the members who contributed |
| Health and Social Care Information Centre | National Head and Neck Cancer Audit, Tenth annual report | 2014 | National Head and Neck Cancer Audit             | Head and Neck Cancer surgery | The Healthcare Quality Improvement Partnership (HQIP), Health and Social Care Information Centre (HSCIC), The British Association of Head and Neck Oncologists (BAHNO) | The professional body overseeing the Audit was the British Association of Head and Neck Oncologists (BAHNO) | The aim of the Audit is to improve quality of care to those patients with head and neck cancer by raising standards of care to match those of the best performing teams.                                                                                                                                                                                                                                                                                                                                                                                                                                                                                                                                                                                                                                                                                                                                                                                                                                                                                                                  | NS | The Audit was commissioned by the Healthcare Quality Improvement Partnership (HQIP) and funded by NHS England and the Welsh Government. | Measures for cancer outcomes have been drawn from the National Institute for Health and Care Excellence (NICE) published guidance on head and neck cancer - this facilitates comparison of practice to national guidance. The Patient Concerns Inventory (PCI) is a tool that helps patients more effectively voice concerns during their follow up, with the aim of better holistic care. For the first time the Audit has collected information on the use of this tool and in future better understanding of | Patient demographics, Patient Concerns Inventory, mortality, treatment received, four year survival, speech and language assessment, time to treatment, Human Papilloma Virus (HPV) status. Whether HPV was tested. Whether there was an MDT discussion. Length of stay, Complications. | Analysis was performed by the HSCIC analysis team, and interpretation of data was facilitated by an Expert Panel of head and neck professionals. It is useful to supplement and link audit data with external data sets such as HES to increase accuracy. Casemix adjusted mortality ratios provide a more meaningful way to compare outcomes between cancer networks. This allows networks to be scored as to whether the mortality rate falls outside expected levels. Combination of | Publicising the registry. Having a restricted data set has led to higher levels of data completeness - it is important to have focused and targeted questioning. It is important to provide staff with adequate support and resources to submit data.                                                                                                                                                                                                                                                                                                                                                                                                              | The Head and Neck Cancer Audit database contains information on more than 54,000 head and neck cancer cases, with 7,700 cases of cancer of the larynx, and more than 7,500 cases of oral tongue cancer. Only a small percentage of patients completed the PCI. Trust participation in the tenth Annual Report is estimated at 96 per cent. 86.0 per cent of patients had treatment recorded; 86.3 per cent in                                                                                                                                           | The report was produced by the National Head and Neck Cancer Audit Project Team under the auspices of the HSCIC.                                                                                                                                                                                                                                                        | Patients concerns inventory (PCI) This is a tool that helps patients more effectively voice concerns during their follow up, with the aim of better holistic care. This is the first time the Audit has collected information on the use of this tool. In this data period only a small percentage of patients completed the PCI, but by publicising it more widely we would hope to see greater uptake in future. | Difficult to get data completion on patient concerns inventory. Difficult to supplementlink the audit data with other data sets like HES which would help make the data more robust. | Helps identify national variation in services. Enables you to check whether guidelines are being met. Enables comparisons of practice between centres, helps inform patients about their disease and potential outcomes. The registry data can also be used to answer questions where existing evidence is lacking. Registry data can also help you map and evaluate the patient pathway. Helps commissioners and providers | NS | NS |                                                                                 |                                                 |                                                                                                                                                                           |

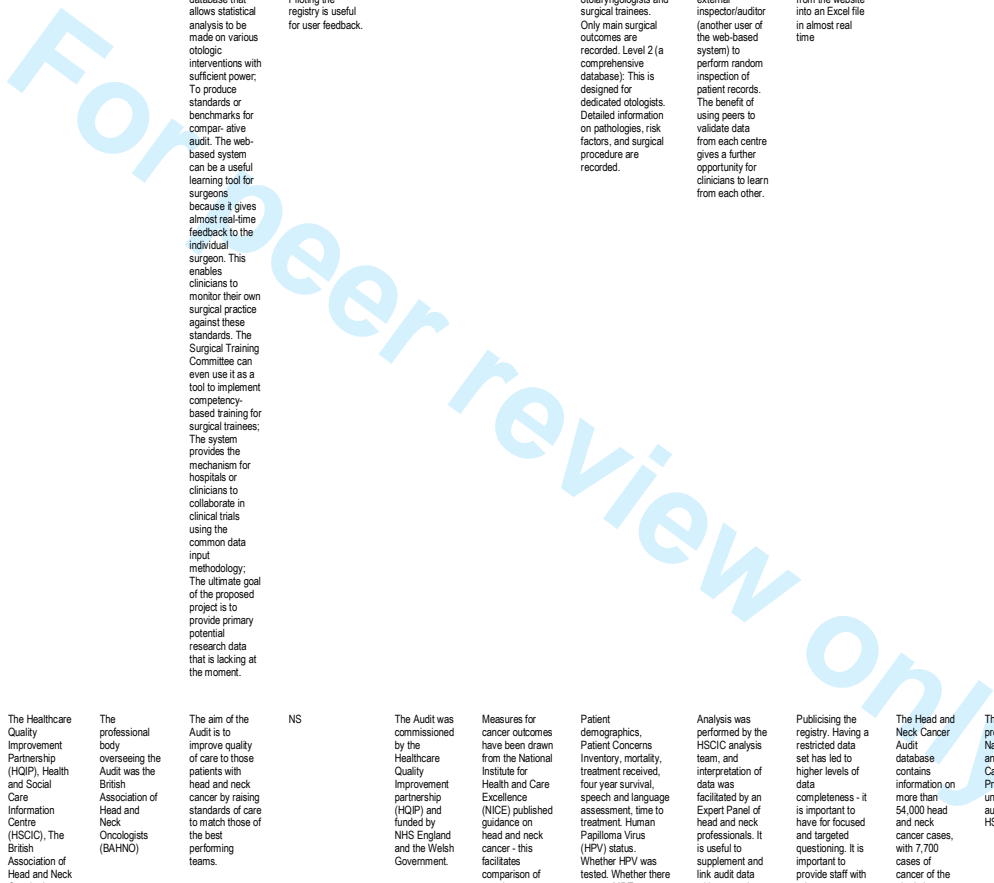



1  
2  
3  
4  
5  
6  
7  
8  
9  
10<sup>b</sup>  
11  
12  
13  
14  
15  
16  
17  
18  
19  
20<sup>b</sup>  
21  
22  
23  
24  
25  
26  
27  
28  
29  
30  
31  
32<sup>b</sup>  
33  
34  
35  
36  
37  
38  
39  
40  
41  
42  
43  
44  
45  
46  
47  
48  
49

adequate protection

|                                          |                                                                                         |      |                                                     |                           |    |                                                         |                                                                                                                                                                                        |                                                                                                                                                      |                                                              |                                                                                                                                                         |                                                                                                                                                                                   |                                                                                                                                                                                                                                                                                                                                                   |                                                                                                                                                                                                                                                 |                                                                                                                                      |    |    |    |                                                                                                                                                                                             |                                                                                                                                                                                                                                                                                                                                                                          |                                                                            |    |
|------------------------------------------|-----------------------------------------------------------------------------------------|------|-----------------------------------------------------|---------------------------|----|---------------------------------------------------------|----------------------------------------------------------------------------------------------------------------------------------------------------------------------------------------|------------------------------------------------------------------------------------------------------------------------------------------------------|--------------------------------------------------------------|---------------------------------------------------------------------------------------------------------------------------------------------------------|-----------------------------------------------------------------------------------------------------------------------------------------------------------------------------------|---------------------------------------------------------------------------------------------------------------------------------------------------------------------------------------------------------------------------------------------------------------------------------------------------------------------------------------------------|-------------------------------------------------------------------------------------------------------------------------------------------------------------------------------------------------------------------------------------------------|--------------------------------------------------------------------------------------------------------------------------------------|----|----|----|---------------------------------------------------------------------------------------------------------------------------------------------------------------------------------------------|--------------------------------------------------------------------------------------------------------------------------------------------------------------------------------------------------------------------------------------------------------------------------------------------------------------------------------------------------------------------------|----------------------------------------------------------------------------|----|
| PELICAN                                  | LOREC APE Perineal Wound Registry                                                       | 2016 | NS                                                  | Abdominoperineal excision | NS | Steering committee. The registry is maintained by LOREC | The objective is to find out which aspects of each procedure (for abdominoperineal excision) are most successful for patients in terms of complication free wound closure and healing. | Online registry hosted on LOREC website.                                                                                                             | NS                                                           | NS                                                                                                                                                      | NS                                                                                                                                                                                | NS                                                                                                                                                                                                                                                                                                                                                | NS                                                                                                                                                                                                                                              | NS                                                                                                                                   | NS | NS | NS | Provides data on current practice and outcomes.                                                                                                                                             | NS                                                                                                                                                                                                                                                                                                                                                                       | There is a data custodian. The registry leads have access to all the data. |    |
| Uberoi R. Milburn S. Moss Jon. Gaines P. | British Society of Interventional Radiology Iliac Artery Angioplasty-Stent Registry III | 2009 | BSIR Iliac Artery Angioplasty-Stent (BIAS) registry | Iliac artery intervention | NS | NS                                                      | Setting standards of practice for interventional radiologists carrying out iliac interventional procedures                                                                             | Based on a previous BIAS registry. Access to the registries could be obtained either through the BSIR Web site or directly at the Dendrite Web site. | The registry is funded by the BSIR on behalf of its members. | Based on a previous BIAS, the data sets were modified so that the number of data collected from each procedure was reduced and free text was minimised. | Type of intervention, patient demographics, co-morbidities, day-case or inpatient, level of clinician, indication, elective/emergency, procedure details, outcome, complications. | Data were collected and analyzed by Dendrite Clinical Systems                                                                                                                                                                                                                                                                                     | Minimise the dataset and amount of free text. Online collection of data. Increase pressure for clinicians to self-audit. External motivation in the form of regular feedback, newsletters, and follow up e-mails requires funding and staff.    | Over a 43-month period (2005 to 2008) 37 institutions submitted data for 2233 patients. This brings the total BIAS database to 4295. | NS | NS | NS | It is challenging to achieve good rates of data completion. This is likely due to lack of time and motivation. It is also difficult to capture long term follow up data. Limited resources. | Provide a structured format for collecting data. Allow comparison of an individual's performance with that of others, highlighting areas which are done well and those in need of improvement. Enables assessment of trends in practice. Enables individuals to carry out regular audits and comply with local and national requirements for appraisal and revalidation. | NS                                                                         | NS |
| Goode SD. Cleveland T.J. Gaines PA       | United Kingdom Carotid Artery Stent Registry: Short- and Long-Term Outcomes             | 2013 | UK CAS Registry                                     | Carotid artery stenting   | NS | NS                                                      | To monitor the practice of CAS with the aims of gathering short and long-term data to better inform our practice.                                                                      | Set up by BSIR. Voluntary registry open to all UK hospitals.                                                                                         | NS                                                           | NS                                                                                                                                                      | Demographics, comorbidities, indications, location of disease, procedure information, 30-day outcomes, complications.                                                             | Data were self-reported and collated by a clinician entering data into the registry. A follow-up form was sent to each centre on an annual basis. Centres that had not returned follow-up forms were sent another form and followed-up by a telephone call. All data were entered onto a clinical database provided by Dendrite Clinical Systems. | Data entry into the registry was encouraged by the publication of the National Institute of Clinical Excellence (NICE) guidance, which advised that data of all patients undergoing CAS should be entered into UK CAS registry held by the BSIR | NS                                                                                                                                   | NS | NS | NS | Enables monitoring of practices.                                                                                                                                                            | NS                                                                                                                                                                                                                                                                                                                                                                       | NS                                                                         |    |

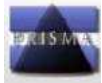

# PRISMA 2009 Checklist

1  
2  
3  
4  
5  
6  
7  
8  
9  
10  
11  
12  
13  
14  
15  
16  
17  
18  
19  
20  
21  
22  
23  
24  
25  
26  
27  
28  
29  
30  
31  
32  
33  
34  
35  
36  
37  
38  
39  
40  
41  
42  
43  
44  
45  
46  
47  
48  
49

| Section/topic                      | #  | Checklist item                                                                                                                                                                                                                                                                                              | Reported on page # |
|------------------------------------|----|-------------------------------------------------------------------------------------------------------------------------------------------------------------------------------------------------------------------------------------------------------------------------------------------------------------|--------------------|
| <b>TITLE</b>                       |    |                                                                                                                                                                                                                                                                                                             |                    |
| Title                              | 1  | Identify the report as a systematic review, meta-analysis, or both.                                                                                                                                                                                                                                         | 1                  |
| <b>ABSTRACT</b>                    |    |                                                                                                                                                                                                                                                                                                             |                    |
| Structured summary                 | 2  | Provide a structured summary including, as applicable: background; objectives; data sources; study eligibility criteria, participants, and interventions; study appraisal and synthesis methods; results; limitations; conclusions and implications of key findings; systematic review registration number. | 2                  |
| <b>INTRODUCTION</b>                |    |                                                                                                                                                                                                                                                                                                             |                    |
| Rationale                          | 3  | Describe the rationale for the review in the context of what is already known.                                                                                                                                                                                                                              | 3-4                |
| Objectives                         | 4  | Provide an explicit statement of questions being addressed with reference to participants, interventions, comparisons, outcomes, and study design (PICOS).                                                                                                                                                  | 4                  |
| <b>METHODS</b>                     |    |                                                                                                                                                                                                                                                                                                             |                    |
| Protocol and registration          | 5  | Indicate if a review protocol exists, if and where it can be accessed (e.g., Web address), and, if available, provide registration information including registration number.                                                                                                                               | 4                  |
| Eligibility criteria               | 6  | Specify study characteristics (e.g., PICOS, length of follow-up) and report characteristics (e.g., years considered, language, publication status) used as criteria for eligibility, giving rationale.                                                                                                      | 4-5                |
| Information sources                | 7  | Describe all information sources (e.g., databases with dates of coverage, contact with study authors to identify additional studies) in the search and date last searched.                                                                                                                                  | 4                  |
| Search                             | 8  | Present full electronic search strategy for at least one database, including any limits used, such that it could be repeated.                                                                                                                                                                               | 4                  |
| Study selection                    | 9  | State the process for selecting studies (i.e., screening, eligibility, included in systematic review, and, if applicable, included in the meta-analysis).                                                                                                                                                   | 4-5                |
| Data collection process            | 10 | Describe method of data extraction from reports (e.g., piloted forms, independently, in duplicate) and any processes for obtaining and confirming data from investigators.                                                                                                                                  | 5                  |
| Data items                         | 11 | List and define all variables for which data were sought (e.g., PICOS, funding sources) and any assumptions and simplifications made.                                                                                                                                                                       | 5                  |
| Risk of bias in individual studies | 12 | Describe methods used for assessing risk of bias of individual studies (including specification of whether this was done at the study or outcome level), and how this information is to be used in any data synthesis.                                                                                      | 5                  |
| Summary measures                   | 13 | State the principal summary measures (e.g., risk ratio, difference in means).                                                                                                                                                                                                                               | 5                  |
| Synthesis of results               | 14 | Describe the methods of handling data and combining results of studies, if done, including measures of consistency (e.g., $I^2$ for each meta-analysis).                                                                                                                                                    | 5                  |



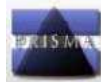

# PRISMA 2009 Checklist

Page 1 of 2

| Section/topic                 | #  | Checklist item                                                                                                                                                                                           | Reported on page # |
|-------------------------------|----|----------------------------------------------------------------------------------------------------------------------------------------------------------------------------------------------------------|--------------------|
| Risk of bias across studies   | 15 | Specify any assessment of risk of bias that may affect the cumulative evidence (e.g., publication bias, selective reporting within studies).                                                             | 5                  |
| Additional analyses           | 16 | Describe methods of additional analyses (e.g., sensitivity or subgroup analyses, meta-regression), if done, indicating which were pre-specified.                                                         | 5                  |
| <b>RESULTS</b>                |    |                                                                                                                                                                                                          |                    |
| Study selection               | 17 | Give numbers of studies screened, assessed for eligibility, and included in the review, with reasons for exclusions at each stage, ideally with a flow diagram.                                          | 5                  |
| Study characteristics         | 18 | For each study, present characteristics for which data were extracted (e.g., study size, PICOS, follow-up period) and provide the citations.                                                             | 5-6                |
| Risk of bias within studies   | 19 | Present data on risk of bias of each study and, if available, any outcome level assessment (see item 12).                                                                                                | 5-6                |
| Results of individual studies | 20 | For all outcomes considered (benefits or harms), present, for each study: (a) simple summary data for each intervention group (b) effect estimates and confidence intervals, ideally with a forest plot. | 6-13               |
| Synthesis of results          | 21 | Present results of each meta-analysis done, including confidence intervals and measures of consistency.                                                                                                  | 6-13               |
| Risk of bias across studies   | 22 | Present results of any assessment of risk of bias across studies (see Item 15).                                                                                                                          | 6                  |
| Additional analysis           | 23 | Give results of additional analyses, if done (e.g., sensitivity or subgroup analyses, meta-regression [see Item 16]).                                                                                    | 6-13               |
| <b>DISCUSSION</b>             |    |                                                                                                                                                                                                          |                    |
| Summary of evidence           | 24 | Summarize the main findings including the strength of evidence for each main outcome; consider their relevance to key groups (e.g., healthcare providers, users, and policy makers).                     | 14                 |
| Limitations                   | 25 | Discuss limitations at study and outcome level (e.g., risk of bias), and at review-level (e.g., incomplete retrieval of identified research, reporting bias).                                            | 15                 |
| Conclusions                   | 26 | Provide a general interpretation of the results in the context of other evidence, and implications for future research.                                                                                  | 16                 |
| <b>FUNDING</b>                |    |                                                                                                                                                                                                          |                    |
| Funding                       | 27 | Describe sources of funding for the systematic review and other support (e.g., supply of data); role of funders for the systematic review.                                                               | 16                 |

From: Moher D, Liberati A, Tetzlaff J, Altman DG, The PRISMA Group (2009). Preferred Reporting Items for Systematic Reviews and Meta-Analyses: The PRISMA Statement. PLoS Med 6(7): e1000097. doi:10.1371/journal.pmed1000097

For more information, visit: [www.prisma-statement.org](http://www.prisma-statement.org).

Page 2 of 2

For peer review only - <http://bmjopen.bmj.com/site/about/guidelines.xhtml>

# BMJ Open

## What are the essential features of a successful surgical registry? A systematic review

|                                 |                                                                                                                                                                                                                                                                                                                                                                                      |
|---------------------------------|--------------------------------------------------------------------------------------------------------------------------------------------------------------------------------------------------------------------------------------------------------------------------------------------------------------------------------------------------------------------------------------|
| Journal:                        | <i>BMJ Open</i>                                                                                                                                                                                                                                                                                                                                                                      |
| Manuscript ID                   | bmjopen-2017-017373.R1                                                                                                                                                                                                                                                                                                                                                               |
| Article Type:                   | Research                                                                                                                                                                                                                                                                                                                                                                             |
| Date Submitted by the Author:   | 18-Jul-2017                                                                                                                                                                                                                                                                                                                                                                          |
| Complete List of Authors:       | Mandavia, Rishi; University College London Ear Institute, Knight, Alec; King's College London, Department of Primary Care and Public Health Sciences<br>Phillips , John<br>Mossialos, Elias; Imperial College London, Institute of Global Health Innovation<br>Littlejohns, Peter; Kings College London, Primary care and public health<br>Schilder, Anne; University college London |
| <b>Primary Subject Heading</b>: | Surgery                                                                                                                                                                                                                                                                                                                                                                              |
| Secondary Subject Heading:      | Health informatics, Research methods, Evidence based practice, Surgery, Health services research                                                                                                                                                                                                                                                                                     |
| Keywords:                       | Registry, Otolaryngology < SURGERY, Health informatics < BIOTECHNOLOGY & BIOINFORMATICS, SURGERY                                                                                                                                                                                                                                                                                     |
|                                 |                                                                                                                                                                                                                                                                                                                                                                                      |

SCHOLARONE™  
Manuscripts

only

**What are the essential features of a successful surgical registry? A systematic review**

Mr Rishi Mandavia (RM) (1)

Dr Alec Knight (AK) (2)

Mr John Phillips (JP) (3)

Professor Elias Mossialos (EM) (4)

Professor Peter Littlejohns (PL) (2)

Professor Anne Schilder (AS) (1)

(1) evidENT team, UCL Ear Institute, Royal National Throat, Nose and Ear Hospital, 330 Grays Inn Road, London WC1X 8DA, UK

(2) Department of Primary Care and Public Health Sciences, King's College London, Addison House, London, SE1 IUL, UK

(3) Department of Ear Nose and Throat Surgery, Norfolk and Norwich University Hospital, Norwich, NR4 7UY, UK

(4) Centre for Health Policy, Imperial College London, St Mary's Hospital, South Wharf Road, London W2 JNY

**Corresponding author**

Mr Rishi Mandavia

Academic Clinical Fellow ENT, NICE Scholar

evidENT Team,

Ear Institute,

University College London

Royal National Throat, Nose and Ear Hospital

330 Grays Inn Road

London, WC1X 8DA

[rishimandavia@gmail.com](mailto:rishimandavia@gmail.com)

+44 (0) 20 3108 9327

## ABSTRACT

### Objective

The regulation of surgical implants is vital to patient safety and there is an international drive to establish registries for all implants. Hearing loss is an area of unmet need and industry is targeting this field with a growing range of surgically-implanted hearing devices. Currently, there is no comprehensive UK-registry capturing data on these devices; in its absence, it is difficult to monitor safety, practices and effectiveness. A solution is developing a national registry of all auditory implants. However, developing and maintaining a registry faces considerable challenges. In this systematic review, we aimed to identify the essential features of a successful surgical registry.

### Methods

A systematic literature review was performed adhering to PRISMA recommendations. A comprehensive search of the Medline and Embase databases was conducted in November 2016 using the Ovid Portal. Inclusion criteria were: publications describing the design, development, critical analysis or current-status of a national surgical registry. All registry names identified in the screening process were noted and searched in the grey literature. Available national registry reports were reviewed from registry websites. Data were extracted using a data extraction table developed by thematic analysis. Extracted data were synthesised into a structured narrative.

### Results

Sixty-nine publications were included. The fundamentals to successful registry development include: steering committee to lead and oversee the registry; clear registry objectives; planning for initial and long-term funding; strategic national collaborations amongst key stakeholders; dedicated registry management team; consensus meetings to agree registry dataset; established data processing systems; anticipating challenges; implementing strategies to increase data completion. Patient involvement and awareness of legal factors should occur throughout the development process.

### Conclusions

1  
2  
3 This systematic review provides robust knowledge that can be used to inform the successful  
4 development of any UK-surgical registry. It also provides a methodological framework for  
5 international surgical registry development.  
6  
7  
8  
9

### 10 **Strengths and limitations of this study**

- 11 • This review provides a systematic and evidence based foundation for the development  
12 of any surgical registry.
- 13 • We adopted a rigorous approach searching both the scientific and grey literature and  
14 used thematic analysis to develop our data extraction table.
- 15 • Data analyses at all stages were cross checked by a second judge and discussed at  
16 consensus meetings.
- 17 • We did not perform quality assessment of the publications included in this review,  
18 owing to the non-empirical nature of included publications and the considerable  
19 heterogeneity amongst types of included publications.
- 20 • By excluding non-surgical registries, we may have failed to capture important  
21 information on registry development. Our decision was based on surgical registries  
22 having specific attributes that we wanted to learn from including: datasets, strategies to  
23 increase surgeon 'buy in', funding sources, key challenges and others.  
24  
25  
26  
27  
28  
29  
30  
31  
32  
33  
34  
35  
36

### 37 **INTRODUCTION:**

38  
39  
40 The effective regulation of surgical implants is vital to patient safety. The Poly Implant  
41 Prothese (PIP) breast implant and metal-on-metal hip implant scandals have identified the  
42 risks of not gathering long term data on implants and surgical outcomes systematically.<sup>1,2</sup> As  
43 such, there is a UK and European-wide drive to establish surgical registries.<sup>3</sup> In the UK there  
44 are a number of well-known surgical registry initiatives including: the National Joint Registry  
45 (NJR), the National Hip Fracture Database (NHFD), the National Bariatric Surgery Registry  
46 (NBSR) and others. There are currently few registry initiatives in ENT Surgery, particularly  
47 within the field of hearing.  
48  
49  
50  
51  
52  
53  
54  
55  
56  
57  
58  
59  
60

1  
2  
3 Hearing loss is an area of unmet need<sup>4,5,6,7</sup> and industry is targeting this field with a growing  
4 range of surgically-implanted hearing devices.<sup>8,9,10,11</sup> Currently, there is no comprehensive  
5 UK-registry capturing data on these devices;<sup>10,12</sup> in its absence, it is difficult to monitor  
6 safety, practices and effectiveness.<sup>5,13</sup> A solution to this is developing a national registry of  
7 all auditory implants. However, developing and maintaining a surgical registry faces  
8 considerable challenges, with the majority of registries having poor rates of data completion  
9 and short life-spans.<sup>14,15</sup> In order to develop a successful surgical registry, it is important to  
10 learn from the experiences of previous and existing registries. In this systematic review, we  
11 aimed to identify the essential features of a successful surgical registry.  
12  
13  
14  
15  
16  
17  
18  
19

## 20 **MATERIALS AND METHODS**

### 21 **Registration**

22 This systematic review was registered on the PROSPERO database. Registration number:  
23  
24  
25  
26 CRD42016039793.  
27  
28  
29

### 30 **Design**

31 Systematic Review and Narrative Synthesis.  
32  
33  
34  
35

### 36 **Search strategy and selection criteria**

37 A systematic review was performed adhering to PRISMA recommendations.<sup>16</sup> With expert  
38 librarian support we designed and conducted a comprehensive search of the Medline and  
39 Embase databases from inception to November 2015 using the Ovid portal. An updated  
40 search was performed in November 2016. The search string used was ((surgery or surgical)  
41 AND (register or registers or registry or registries)) AND (britain\$ or "united kingdom\$" or uk  
42 or england\$ or northern ireland\$ or wales\$ or scotland\$). The full search strategy is  
43 provided in Appendix 1. All registry names identified in the screening process were noted  
44 and searched in the grey literature. Available national registry reports were reviewed from  
45 registry websites. We also visually scanned reference lists and searched relevant citations in  
46 the grey literature. Two authors (R.M and J.P) searched the literature independently and  
47 compared results at each stage of the PRISMA flowchart (Figure 1). A third author (A.S)  
48 arbitrated disagreements.  
49  
50  
51  
52  
53  
54  
55  
56  
57  
58  
59  
60

1  
2  
3  
4  
5 Criteria for publications to be included were: publications describing the design,  
6 development, critical analysis or current-status of a national surgical registry. Exclusion  
7 criteria were: non-English language; publications over ten years old; and publications  
8 describing non-surgical or non UK-registries.  
9  
10

### 11 12 13 **Data extraction and synthesis**

14  
15 A data extraction table was produced in Microsoft Excel, containing 20 column headings  
16 developed by the first author (R.M) (see Table 1). These headings were developed following  
17 immersion in the dataset and using thematic analysis to identify the key themes for data  
18 extraction. R.M extracted the data, allocating relevant information from each included  
19 publication to each of the data columns described in Table 1. A second author (J.P) cross-  
20 checked the development of the data extraction table and the data extraction and this  
21 process was discussed at two interim consensus meetings. Data were then synthesised by  
22 summarising the data under each column heading into a structured narrative, following the  
23 principles outlined by Popay et al.<sup>17</sup>  
24  
25  
26  
27  
28  
29  
30  
31  
32

## 33 **RESULTS**

34  
35  
36  
37 After duplicates were removed, titles and abstracts of 1389 publications were screened.  
38 Thirty-five additional records were identified from other sources. Fifty-nine publications  
39 fulfilled the criteria for analysis. After conducting our updated search, ten additional  
40 publications were included, resulting in 69 publications for analysis. See Figure 1 for the  
41 PRISMA flowchart.  
42  
43  
44

45  
46  
47 Included publications consisted of annual registry reports and analyses, registry overview  
48 documents, editorials, commentaries, registry proposal documents and registry review  
49 articles and covered a range of surgical specialities (see Table 2). Appendix 2 shows the full  
50 data extraction table, identifying the relevant information from each included publication.  
51  
52  
53  
54

55  
56 Below is a narrative synthesis of the full data extraction table. The numerical and  
57 alphabetical digits below correspond to the data extraction columns in Appendix 2.  
58  
59  
60

## Registry planning

### *Registry leadership and management (1.G)*

Registries are typically led by steering committees comprising professional and clinical stakeholders as well as patient representatives<sup>18-22</sup> Steering committees should have overall responsibility for registry design, data monitoring, data analysis<sup>23</sup> as well as strategic direction, oversight, and allocation of registry resources.<sup>19,21,24,25</sup>

It is important for registry management to receive input from both clinical and data management experts.<sup>26,27</sup> Local registry managers help maximise data completion and accuracy;<sup>21</sup> and private companies have been employed to successfully manage several UK-national registries.<sup>25,28-30</sup>

### *The objective(s) of a surgical registry (1.H)*

Registries should have a clear set of objectives from the outset; these often include: improving patient care, providing comparisons of standards, monitoring current practice, monitoring device durability and intervention performance, identifying variations in service provisioning as well as guiding commissioning and guideline development.<sup>12,19,20,22,30-32</sup> Other aims include gaining a better understanding of disease epidemiology<sup>19,21,33</sup> and promoting future research, innovation, efficiency, transparency and patient decision making.<sup>28,34-38</sup> The addition of objectives at a later stage, after the registry is established, will likely lead to challenges.<sup>12,14,15,32</sup> For instance, a registry developed to improve patient care will unlikely be successful in driving research, due to the registry not being developed to collect and report on data relevant to researchers.<sup>12,20,22,23</sup> Registries including the NHFD, NJR and NBSR have demonstrated that by setting clear objectives from the outset, and by involving key stakeholders including clinicians, patients, and researchers during registry development, a registry can successfully deliver on multiple objectives, including, improving patient care and driving research.<sup>20,25,27</sup>



### *Funding (1.J)*

Registries require considerable resources for initial set-up and ongoing maintenance.<sup>26</sup> Owing to implant lifespan, implant registries in particular should plan for long-term funding. Central funding sources include the Healthcare Quality Improvement Partnership (HQIP), NHS England, the Department of Health (DOH) and national commissioners.<sup>22,26,39</sup> Industry can also contribute to funding, although it is important to consider governance around industry access to registry data.<sup>21,29,40,41</sup> Other sources of funding include participating hospitals,<sup>21</sup> charities,<sup>42</sup> professional societies,<sup>43</sup> annual capitation fees,<sup>36</sup> and charging for data requests.<sup>26</sup> Registry costs can also be incorporated into the price of each implant.<sup>27</sup> Funding often comes from multiple sources.<sup>20,21,26,27,44</sup>

### *Establishing collaborations (1.F)*

It is important to form strategic national collaborations amongst stakeholders including: patient groups, clinicians, specialist societies, industry, commissioners, funding bodies, hospitals, academic groups and those involved in data collection and management.<sup>19,26,27,32</sup> Working with and learning from existing regional registries was a successful strategy adopted by the National Vascular Registry.<sup>45</sup> International collaborations can help align the registry with global surgical initiatives<sup>27,38,46</sup> and links with the implant industry can facilitate implant tracking.<sup>47</sup> Collaborations with national institutes including the National Institute for Health and Care Excellence (NICE) and the Royal Colleges can align registry data with national guidelines development and re-validation.<sup>19</sup> Collaborations with geriatrics societies and charities can help data collection on elderly patients.<sup>20</sup>

### *Registry development and design (1.I)*

Reaching stakeholder consensus on registry objectives, dataset and activities is essential.<sup>20,36,48</sup> The registry can be developed from existing smaller registries<sup>45</sup> and piloting the registry is important in obtaining user feedback.<sup>21,40,49-51</sup> Web-based electronic platforms facilitate quick and accurate data collection and tailored IT systems can be developed to

1  
2  
3 provide a secure, interactive and easy-to-use registry platform.<sup>20,29,30,50,52</sup> NICE advises that  
4 registries should be recorded on a national database of registers.<sup>23</sup>  
5  
6  
7

## 8 **Dataset and data management**

9

### 10 *Rationale behind a registry dataset (1.K)*

11

12  
13  
14  
15 It is advisable for datasets to be developed through stakeholder and patient consensus  
16 meetings,<sup>48,53,54</sup> with a balance between comprehensibility and feasibility: comprehensive  
17 datasets are unlikely to achieve data completion whilst limited datasets may be less  
18 useful.<sup>24,29,38</sup> Flexible datasets built with the ability to evolve can help promote registry  
19 longevity, but an initial period of consistency helps embed the registry.<sup>26,49</sup> It can also be  
20 useful to build upon existing registry datasets from the same speciality.<sup>28,46,51,54</sup>  
21  
22  
23  
24  
25  
26  
27

28 Whilst collecting quality of life (QoL) and patient reported outcomes (PRO) data is vital for  
29 evaluation of treatments and services,<sup>55,56</sup> collecting such data in the context of a national  
30 registry is resource intensive and may affect data completion.<sup>55</sup> Deciding which PROs to  
31 choose can also be an area of controversy and disagreement.<sup>55</sup> If PROs are introduced, it is  
32 advisable to keep the number of questions short and for these data to be collected directly  
33 from patients at regular, planned time points, rather than relying on clinic follow-ups.<sup>30,55</sup>  
34  
35  
36  
37  
38  
39

40 The design of registry datasets can accommodate national guideline  
41 recommendations;<sup>23,45,57,58</sup> for example the NHFD dataset is designed to facilitate easy  
42 comparison to NICE guidance,<sup>20</sup> and the National Vascular Registry adapted datasets to  
43 capture key issues highlighted by National Confidential Enquiry into Patient Outcomes and  
44 Deaths (NCEPOD).<sup>45</sup>  
45  
46  
47  
48

### 49 *Dataset (1.L)*

50

51  
52  
53  
54 Whilst specific registry data-items vary between surgical specialities; the majority of UK-  
55 surgical registries collect the pre-operative, operative and post-operative data-items  
56  
57  
58  
59  
60

1  
2  
3 summarised in Table 3. A free text box can also be included to capture additional relevant  
4 information.<sup>30</sup>  
5  
6  
7

### 8 *Data processing (1.M)* 9

10  
11 To improve data quality and accuracy, data from participating centres should be internally  
12 validated by local registry managers and clinicians before being cleaned.<sup>21,59,60</sup> Data cleaning  
13 can take place locally or centrally and involves detecting and resolving data problems.<sup>26,28,32</sup>  
14 Prior to central analysis, data can be returned to each contributing centre to take any  
15 necessary remedial actions.<sup>26,53,59,61</sup> On site data verification by auditors is considered good  
16 practice.<sup>40,60,62</sup> Although these visits focus on completeness and accuracy of data, they also  
17 provide an important opportunity for education of clinicians and local registry managers  
18 adding to ongoing data quality<sup>40,48,60,62</sup> and for discussion with administrators about  
19 appropriate resources for information management.<sup>60</sup> Feedback through reports evaluating  
20 quality of local data collection can be sent to contributing centres to stimulate  
21 improvements; and independent validation of data including data completeness, mortality,  
22 readmission and revision can be achieved by linking registry patient records to the Office of  
23 National Statistics and Hospital Episode Statistics (HES).<sup>18,35,36,58,60,62,63</sup> NICE recommends  
24 that the process for data collection, storage and analysis should be independent of any  
25 particular company or commercial interest.<sup>23</sup>  
26  
27  
28  
29  
30  
31  
32  
33  
34  
35  
36  
37  
38  
39

### 40 *Data reporting (1.P)* 41

42  
43 Registries usually publish information via annual on-line comprehensive reports,<sup>21,26,32,36,62-64</sup>  
44 research publications and presentations.<sup>27,39,62,65</sup> There is controversy surrounding the  
45 publication of surgeon specific data. Evidence suggests that publishing this data is  
46 associated with improvements in mortality<sup>62</sup> as well as increased transparency, patient trust  
47 and improved supervision of juniors surgeons,<sup>25,66</sup> with no evidence of 'risk-adverse' surgical  
48 behaviour.<sup>26,62,66</sup> When publishing surgeon specific outcomes, it is important to statistically  
49 adjust for case-mix, to take into account complex, high risk cases.<sup>63,66</sup> It is recommended  
50 that team level data are published to reflect that outcomes are dependent on the entire  
51 surgical team, not solely the consultant surgeon.<sup>66</sup> Minimising the time between the surgical  
52  
53  
54  
55  
56  
57  
58  
59  
60

1  
2  
3 event and the release of data is also important for the identification of faulty implants or  
4 unsafe practices.<sup>63</sup>  
5  
6  
7

## 8 **Challenges and data completion**

9

### 10 *Difficulties encountered/challenges (1.R)*

11  
12  
13  
14  
15 Registries relying on voluntary data submission are dependent on user motivation and are  
16 unlikely to achieve complete data capture.<sup>35,56,67</sup> Voluntary data submission can also result  
17 in reporting bias with underreported complications and a non-consecutive, non-  
18 representative patient group.<sup>35,44,64</sup> Insufficient financial resources for registry development  
19 and maintenance is a frequent challenge<sup>56,68,69</sup> as is lack of stakeholder and patient 'buy-in,'  
20 resulting in poor data quality and completeness.<sup>22,31,43</sup> Registries can be perceived to worsen  
21 documentation pressures, which may compromise data recording and limit  
22 participation.<sup>22,51</sup> Reaching stakeholder consensus on the registry dataset is challenging;<sup>22,70</sup>  
23 and datasets with unclear definitions as well as those unable to adapt to changes in practice  
24 can result in difficulties in drawing national comparisons and tracking surgical  
25 activity.<sup>28,31,43,50,62</sup> Collecting long-term follow-up data can also be challenging, particularly  
26 when patients are under the care of multiple hospitals and clinicians.<sup>25,44,51,55,70</sup>  
27  
28  
29  
30  
31  
32  
33  
34  
35  
36  
37

### 38 *Strategies to increase data completion (1.N)*

39

40  
41  
42 Data completion can be optimised by careful registry design and by involving stakeholders  
43 throughout its development, promoting 'buy-in'.<sup>25,26</sup> An online registry that is user-friendly,  
44 multi-browser compatible, simple, quick-to-use, and has clear data definitions will increase  
45 data input.<sup>24,26,30</sup> Other optimisation strategies include real-time data input, reminders for  
46 mandatory fields, hover-tip prompts, on-screen data validation checks, numeric limits, auto-  
47 calculations, drop-down menus, calendar support, and limiting free-text fields.  
48  
49  
50  
51  
52  
53  
54  
55  
56  
57  
58  
59  
60

19,25,40,48,50,51,71 It is critical that data-input is supported by allocation of dedicated time and  
resources, regional training sessions, succinct user guides, real-time 'chat' support, as well  
as email and telephone support.<sup>19,22,40,43</sup> Mobile 'apps' allow easy remote registry access  
and can also help increase data completion.<sup>22,24,30,47</sup>

1  
2  
3  
4  
5 Registries that are of clear value to clinicians and institutions are more likely to achieve data  
6 completion.<sup>25,26,30,46</sup> For example, registry systems producing automated clinic letters or  
7 operation notes or that help record data for self-audit and revalidation are more likely to be  
8 used.<sup>18,25,35,37</sup> A research friendly registry can also help increase participation, particularly if  
9 registry contributors can be listed co-authors.<sup>41,65</sup>

10  
11  
12  
13  
14  
15 Regular performance feedback can help maintain local interest in the registry.<sup>18,19,55</sup> The  
16 NHFD produces online graphs with live data on performance, time-to-surgery, mortality,  
17 length-of-stay (LOS), best practice and patient safety.<sup>20</sup> The NJR has increased registry  
18 participation through a programme of local audits and by issuing data quality certificates  
19 that provide incentive to submit high quality data and highlight hospitals not complying with  
20 mandatory requirements. Another measure employed by the NJR is sharing cost-saving  
21 information on best implant prices, on the proviso that hospital trusts submit data to the  
22 NJR.<sup>27</sup>

23  
24  
25  
26  
27  
28  
29  
30  
31 Regular published reports and journal articles have been found to raise the profile of the  
32 registry, highlight non-participating units and increase data completeness and accuracy.<sup>60</sup>  
33 Advertising can increase awareness and participation via press coverage, emails, society  
34 bulletins, letters to eligible members, conferences, regional meetings, word-of-mouth and  
35 through journal advertisements.<sup>20,35,44,51,58,60,72</sup>

36  
37  
38  
39  
40  
41  
42 Making data input compulsory for revalidation or commissioning, or both, appears to be the  
43 most successful method of increasing data completion.<sup>19,25,27,51,60,62,67,22,70</sup>

#### 44 45 46 47 **Patient involvement and legal factors**

##### 48 49 50 *Patient involvement (1.Q)*

51  
52  
53  
54 Patient involvement in registry leadership, design, development and reporting increases the  
55 relevance of the registry to patients, commissioners and policy makers.<sup>18,27,31,36,54</sup> Patients  
56 entering their own data via electronic patient portals can be particularly useful in collecting  
57  
58  
59  
60

1  
2  
3 QoL and long-term follow-up data.<sup>22,24,30,47,55</sup> To help increase registry patient participation  
4 it is important to acquire consent early, have a registry coordinator for patient follow-up,  
5 and have multiple language options.<sup>55</sup> Facilitating patient access to data promotes  
6 transparency, patient choice and involvement.<sup>27,62,63</sup>  
7  
8  
9

### 10 11 *Legal factors, ethics and data access (1.U)*

12  
13  
14  
15 UK-surgical registries must comply with DOH data protection and information governance  
16 legislation for secure processing of patient healthcare data.<sup>21,36,53</sup> This process can be guided  
17 by the Data Protection Act, General Medical Council (GMC) guidance, the Caldecott  
18 Confidentiality Principles and information found in the Information Governance Toolkit of  
19 the Health and Social Care Information Centre.<sup>36,39,73</sup> The registry should be implemented  
20 and reported in accordance with Declaration of Helsinki ethical principles.<sup>40</sup> Patient  
21 informed consent should be obtained for data submission and data should be anonymised  
22 in all cases.<sup>30,40,53,60,70</sup> Failure to function within a legal framework can result in legal  
23 termination with potential criminal repercussions.<sup>26</sup>  
24  
25  
26  
27  
28  
29  
30  
31  
32

33 Whilst easy access to the registry is essential,<sup>24</sup> data privacy should be maintained and data  
34 should be stored securely and not shared without appropriate permissions.<sup>22,26,32,36,63,70</sup> It is  
35 important for data release to be governed under a defined data-sharing agreement, where  
36 the security and uses of the data are clearly defined.<sup>19,21,36</sup> Registries can have  
37 subcommittees or data managing groups that are responsible for reviewing formal access  
38 requests and ethical assessment.<sup>19,29,36,40</sup>  
39  
40  
41  
42  
43  
44

### 45 **Registry success**

#### 46 47 48 *Benefits of registries (1.S)*

49  
50  
51  
52 Surgical registries can help underpin research including randomised controlled trials, assess  
53 and improve cost-effectiveness as well as inform risk-prediction models.<sup>26,36,47,74,75</sup> Other  
54 benefits include improved patient decision-making, treatment development, and  
55 identification of trends in practice.<sup>25,28,56</sup> Registries can facilitate inter(national) comparisons  
56  
57  
58  
59  
60

1  
2  
3 between centres as well as personal audit and revalidation.<sup>30,35,46,55,67,75</sup> Publically-accessible  
4 registries can increase public trust and promote transparency and patient choice.<sup>61</sup> With the  
5 growing number of surgical implants, registries can help identify both the highest  
6 performing and faulty implants.<sup>47,71,76</sup> The collection, feedback and publication of registry  
7 data is now a recognised way of informing clinical practice, driving quality improvement and  
8 improving patient care and safety.<sup>40,61,63,71</sup> Since the National Audit Cardiac Surgery (NACSA)  
9 registry was introduced, risk-adjusted in-hospital mortality for cardiac surgery in the UK has  
10 fallen by over 50% despite more elderly and high-risk patients having surgery each year.<sup>26</sup>  
11 Following the start of the NHFD, rates of early surgery increased from 54.5% to 71.3% and  
12 thirty-day mortality fell from 10.9% to 8.5%.<sup>20</sup>  
13  
14  
15  
16  
17  
18  
19  
20  
21

22 Registry data can support agencies to monitor and evaluate the quality of healthcare  
23 delivered.<sup>20</sup> They can also help identify national variations in service provisioning, map and  
24 evaluate patient pathways as well as inform health service commissioning and  
25 policy.<sup>37,45,56,58,71,74,77</sup> Regulatory organisations including NICE recognise the value of  
26 registries in technology assessment particularly in the absence of formal trials.<sup>23,44,70</sup> When  
27 compared to trials, registries require fewer resources and often collect data from a broader  
28 population base so their findings have strong external validity.<sup>41,78</sup> They also frequently  
29 provide data on long-term outcomes that exceed the study window of a trial.<sup>65</sup> They can be  
30 of particular value when investigating patient groups that are usually excluded from clinical  
31 trials such as the elderly.<sup>79</sup>  
32  
33  
34  
35  
36  
37  
38  
39  
40  
41

#### 42 *Measures of a successful registry (1.T)*

43  
44

45 A successful registry is one that is easily accessible, has a high degree of data completion  
46 and participation and helps promote inter(national) collaboration.<sup>22,26,63,68,69</sup> They provide  
47 timely feedback to their users, identify trends in practice, improve standards of care and  
48 identify failures at the earliest opportunity.<sup>20,48,63</sup> Successful registries are useful to their  
49 stakeholders and contain validated data that are accurate and easy to analyse.<sup>22,39,55,71,79</sup>  
50  
51  
52  
53  
54  
55  
56  
57  
58  
59  
60

## DISCUSSION

In this systematic review, we have identified the fundamentals for developing a successful UK-surgical registry. Whilst we highlight the need for a registry of auditory implants, our findings have implications to the wider surgical community since we provide information that can be used to inform the development of any UK-surgical registry.

### Summary of findings

The fundamentals to successful registry development identified by this synthesis are summarised in Figure 2 and include: steering committee to lead and oversee the registry; clear registry objectives; planning for initial and long-term funding; strategic national collaborations amongst key stakeholders; dedicated registry management team; consensus meetings to agree registry dataset; established data processing systems; anticipating challenges; implementing strategies to increase data completion. Patient involvement and awareness of legal factors should occur throughout the developmental process.

### Relevance to existing research

There is a clear need for surgical registry data to improve patient safety and help regulate surgical practices. Concerns over the evidence base for surgical implants in general has been raised by the IDEAL collaborative and the House of Commons Science and Technology committee.<sup>3,80</sup> Across the UK and EU, implants can enter surgical practice on the basis of equivalence data, meaning that an implant can be used on the basis of similarity to another implant rather than evidence of its own safety and effectiveness.<sup>3,80</sup> Transparency and post-market surveillance are additional concerns with data on safety and performance of implants not being fully published.<sup>3</sup> The recall of the PIP breast implants and metal on metal hip implants identify the dangers of relying on equivalence data for the evaluation of safety and efficacy.<sup>1,2</sup>

Owing to these concerns, the IDEAL collaborative, DOH, NICE, policymakers and commissioning groups have called for surgical registries that can collect prospective outcome and safety data, promote transparency as well as provide patients and the public with information on their care.<sup>3,8,11,80,81</sup> It has also been recognised that registry data can



1  
2  
3 serve as a valuable alternative to randomised trials, which can be unfeasible and of limited  
4 scientific use - particularly at the development stage of a surgical innovation.<sup>41,65</sup> When  
5 compared to trials, registries require fewer resources, have stronger external validity and  
6 tend to provide longer term outcome data.<sup>41,65</sup>  
7  
8  
9

### 10 11 12 **Implications**

13 This review provides evidence based knowledge on registry development that can be used  
14 by existing and developing UK-surgical registries to increase their chance of success.

15 Successful registries provide essential clinical and cost-effectiveness data for policy and  
16 guidelines development.<sup>26,47,74,75</sup> They also help develop (inter)national research  
17 collaborations as well as promote patient choice, trust and transparency.<sup>25,28,56,61</sup> Other  
18 implications include facilitating inter(national) benchmarking and personal audit.<sup>35,46,55,67,75</sup>

19 Successful registries help drive healthcare quality improvement, improve patient safety and  
20 allow commissioners and service providers to monitor quality, detect faulty implants early,  
21 monitor patient usage, identify variations in practice and allocate payments  
22 fairly.<sup>45,47,56,71,74,76</sup> From an international perspective, this review provides a methodological  
23 framework that can be adopted by other countries to promote successful national surgical  
24 registry development.  
25  
26  
27  
28  
29  
30  
31  
32  
33  
34  
35

### 36 37 **Strengths and limitations**

38 We acknowledge that the quality and reliability of included publications likely varied due to  
39 their heterogeneity; publications included: annual registry reports and analyses, registry  
40 overview documents, editorials, commentaries, registry proposal documents and registry  
41 review articles. In addition, owing to the nature of included publications, much of the data  
42 collected were from non-empirical, opinion based articles. This heterogeneous and non-  
43 empirical nature of included publications also precluded formal quality assessment. We  
44 recognise that the development of the data extraction table and the data extraction may  
45 have been influenced by researcher bias. However, to mitigate this, both stages were cross-  
46 checked by a second researcher and discussed at two interim consensus meetings. We also  
47 acknowledge that by excluding non-surgical registries, we may have failed to capture  
48 important information on registry development. Our decision was based on surgical  
49  
50  
51  
52  
53  
54  
55  
56  
57  
58  
59  
60

registries having specific attributes that we wanted to learn from including: datasets, strategies to increase surgeon 'buy in', funding sources, key challenges and others.

A key strength of this review is that it provides an evidence based foundation for the development of any surgical registry. We adopted a rigorous approach searching both the scientific and grey literature and used thematic analysis to develop our data extraction table. Moreover, data analyses at all stages were cross checked by a second judge and discussed at consensus meetings.

## CONCLUSION

This systematic review provides robust knowledge that can be used to inform the successful development of any UK-surgical registry. It also provides a methodological framework for international surgical registry development.

**Contributors:** R.M and J.P conducted the title, abstract and full-text review for this study, and performed the data extraction. All authors were involved in drafting the manuscript. R.M, A.K, A.S, E.M, P.L developed the search strategy. All authors were involved in conceiving the idea for this study and drafted major parts of the manuscript. All authors read and approved the final manuscript.

**Acknowledgements:** None

**Competing interests:** None declared

**Funding:** R.M was supported by a NICE Scholarship, a NIHR Academic Clinical Fellowship and a UCL Public Policy Grant. A.S was supported by a NIHR Research Professorship. A.K and P.L were supported by the NIHR Collaboration for Leadership in Applied Health Research and Care South London at King's College Hospital NHS Foundation Trust. Funders were not involved in study design, data collection, data analysis, manuscript preparation or publication. All authors had complete access to the study data that support the publication.

1  
2  
3 The views expressed are those of the author[s] and not necessarily those of the NHS, the  
4 NIHR or the Department of Health.  
5  
6  
7

8 **Provenance and peer review:** Not commissioned; externally peer reviewed.  
9

10  
11 **Data sharing statement:** No additional data available.  
12  
13

## 14 REFERENCES

- 15  
16  
17  
18  
19  
20 1 Oulharj S, Pauchot J, Tropet Y. PIP breast implant removal: a study of 828 cases.  
21 *J Plast Reconstr Aesthet Surg* 2014;**67**:302–307.  
22  
23  
24  
25 2 Smith AJ, Dieppe P, Vernon K, *et al*. Failure rates of stemmed metal-on-metal  
26 hip replacements: analysis of data from the National Joint Registry of England  
27 and Wales. *Lancet* 2012;**379**:1199–1204.  
28  
29  
30  
31  
32  
33 3 House of Commons Science and Technology Committee (2012). Regulation of  
34 Medical Implants in the UK and EU;  
35 [http://www.publications.parliament.uk/pa/cm201213/cmselect/cmsstech/163/](http://www.publications.parliament.uk/pa/cm201213/cmselect/cmsstech/163/163.pdf)  
36 [163.pdf](http://www.publications.parliament.uk/pa/cm201213/cmselect/cmsstech/163/163.pdf) [accessed 12 October 2016]  
37  
38  
39  
40  
41  
42  
43  
44 4 Hearing loss: an important global health concern. *Lancet* 2016;**387**:2351.  
45  
46  
47 5 Committee on Accessible and Affordable Hearing Health Care for Adults, Board  
48 on Health Sciences Policy, Health and Medicine Division, National Academies of  
49 Sciences, Engineering, and Medicine. Hearing Health Care for Adults [Internet].  
50 Blazer DG, Domnitz S, Liverman CT, editors. Washington, D.C: National  
51 Academies Press; 2016. <http://www.nap.edu/23446> [accessed 2 November  
52  
53  
54  
55  
56  
57  
58  
59  
60

- 1  
2  
3 2016]
- 4  
5  
6 6 Leverton T. Hearing loss is important in dementia. *BMJ* 2015;**350**:h3650.  
7  
8  
9  
10 7 Lamb B, ONeill C, Atkins J. The Real Cost of Adult Hearing Loss. Ear Foundation  
11  
12 2014. <http://www.earfoundation.org.uk/news/articles> [accessed 5 November  
13  
14 2016]
- 15  
16  
17 8 Department of Health. Action Plan on Hearing Loss 2015.  
18  
19 [https://www.england.nhs.uk/wp-content/uploads/2015/03/act-plan-hearing-](https://www.england.nhs.uk/wp-content/uploads/2015/03/act-plan-hearing-loss-upd.pdf)  
20  
21 [loss-upd.pdf](https://www.england.nhs.uk/wp-content/uploads/2015/03/act-plan-hearing-loss-upd.pdf) 13 [accessed 12 November 2016]  
22  
23  
24  
25 9 NHS England 2016 Clinical Commissioning Policy: Bone conducting hearing  
26  
27 implants (BCHIs) for hearing loss (all ages).  
28  
29 [https://www.england.nhs.uk/commissioning/wp-](https://www.england.nhs.uk/commissioning/wp-content/uploads/sites/12/2013/05/16041_FINAL.pdf)  
30  
31 [content/uploads/sites/12/2013/05/16041\\_FINAL.pdf](https://www.england.nhs.uk/commissioning/wp-content/uploads/sites/12/2013/05/16041_FINAL.pdf) [accessed 15 August 2016]  
32  
33  
34  
35 10 NHS Commissioning Board (2013). Clinical Commissioning Policy: Bone  
36  
37 Anchored Hearing Aids. [https://www.england.nhs.uk/wp-](https://www.england.nhs.uk/wp-content/uploads/2013/04/d09-p-a.pdf)  
38  
39 [content/uploads/2013/04/d09-p-a.pdf](https://www.england.nhs.uk/wp-content/uploads/2013/04/d09-p-a.pdf) [accessed 15 August 2016]  
40  
41  
42  
43 11 National Institute of Health & Care Excellence. Cochlear implants for children  
44  
45 and adults with severe to profound deafness. NICE technology appraisal  
46  
47 guidance 2009 [TA166].  
48  
49  
50  
51  
52 12 Ear Foundation. National Bone Conducting Hearing Implant Registry.  
53  
54 [http://www.earfoundation.org.uk/hearing-technologies/bone-conducting-](http://www.earfoundation.org.uk/hearing-technologies/bone-conducting-hearing-implants/national-bone-conducting-hearing-implant-registry)  
55  
56 [hearing-implants/national-bone-conducting-hearing-implant-registry](http://www.earfoundation.org.uk/hearing-technologies/bone-conducting-hearing-implants/national-bone-conducting-hearing-implant-registry) [accessed  
57  
58  
59  
60

1  
2  
3 14 September 2016]  
4  
5

- 6 13 GENERATE. The Research Agenda for ENT, Hearing and Balance Care. A UK  
7  
8 Partnership of Patients, Professionals and the Public.  
9  
10 [https://entuk.org/sites/default/files/files/Research%20Agenda%20ENT%20Hear](https://entuk.org/sites/default/files/files/Research%20Agenda%20ENT%20Hearing%20and%20Balance%2030%2011%2015.pdf)  
11 [ing%20and%20Balance%2030%2011%2015.pdf](https://entuk.org/sites/default/files/files/Research%20Agenda%20ENT%20Hearing%20and%20Balance%2030%2011%2015.pdf) [accessed 14<sup>th</sup> September 2016]  
12  
13  
14  
15  
16 14 Gliklich RE, Dreyer NA, Leavy MB. Registries for Evaluating Patient Outcomes: A  
17  
18 User's Guide, 3rd edn. Rockville (MD): Agency for Healthcare Research and  
19  
20 Quality (US), 2014  
21  
22  
23  
24 15 Workman TA. Engaging Patients in Information Sharing and Data Collection: The  
25  
26 Role of Patient-Powered Registries and Research Networks. Rockville (MD):  
27  
28 Agency for Healthcare Research and Quality (US), 2013  
29  
30  
31  
32 16 Moher D, Altman DG, Liberati A, *et al*. PRISMA statement. *Epidemiology*.  
33  
34 2011;**22**:128–authorreply128.  
35  
36  
37  
38 17 Popay J, Roberts H, Sowden A, *et al*. Guidance on the conduct of Narrative  
39  
40 Synthesis in Systematic review. A Product from the ESRC methods programme  
41  
42 (2009).  
43  
44 [http://www.lancaster.ac.uk/shm/research/nssr/research/dissemination/publica](http://www.lancaster.ac.uk/shm/research/nssr/research/dissemination/publications/NS_Synthesis_Guidance_v1.pdf)  
45  
46 [tions/NS\\_Synthesis\\_Guidance\\_v1.pdf](http://www.lancaster.ac.uk/shm/research/nssr/research/dissemination/publications/NS_Synthesis_Guidance_v1.pdf) [accessed 10 October 2016]  
47  
48  
49  
50 18 NELA Project Board. National Emergency Laparotomy Audit (NELA) Protocol  
51  
52 2014.  
53  
54  
55  
56 19 Ludman PF. The UK transcatheter aortic valve implantation registry; one of the  
57  
58  
59  
60

- 1  
2  
3 suite of registries hosted by the National Institute for Cardiovascular Outcomes  
4  
5 Research (NICOR). *Heart* 2012;**98**:1787–1789.  
6  
7  
8  
9 20 National Hip Fracture Database NHFD workstream delivery team. National Hip  
10  
11 Fracture Registry Annual Report 2015.  
12  
13  
14 21 Koliass AG, Bulters DO, Cowie CJ, *et al.* Proposal for establishment of the UK  
15  
16 Cranial Reconstruction Registry (UKCRR). *Br J Neurosurg* 2014;**28**:310–314.  
17  
18  
19  
20 22 Breakwell LM, Cole AA, Birch N, *et al.* Should we all go to the PROM? The first  
21  
22 two years of the British Spine Registry. *Bone Joint J* 2015;**97-B**:871–874.  
23  
24  
25  
26 23 National Institute for Health and Care Excellence. Interventional procedures  
27  
28 programme manual. 2016. [https://www.nice.org.uk/process/pmg/chapter/draft-](https://www.nice.org.uk/process/pmg/chapter/draft-recommendations/data-collection-to-address-uncertainty)  
29  
30 [recommendations/data-collection-to-address-uncertainty](https://www.nice.org.uk/process/pmg/chapter/draft-recommendations/data-collection-to-address-uncertainty) [accessed 16<sup>th</sup>  
31  
32 November 2016]  
33  
34  
35  
36 24 Gabr A, O'Leary S, Spalding T, *et al.* The UK National Ligament Registry Report  
37  
38 2015. *Knee* 2015;**22**:351–353.  
39  
40  
41  
42 25 Welbourn R, Small P, Finlay I, *et al.* The UK national bariatric surgery registry:  
43  
44 The second report 2014.  
45  
46  
47  
48 26 Hickey GL, Grant SW, Cosgriff R, *et al.* Clinical registries: governance,  
49  
50 management, analysis and applications. *Eur J Cardiothorac Surg* 2013;**44**:605–  
51  
52 614.  
53  
54  
55  
56 27 The NJR Editorial Board. National Joint Registry 12th Annual Report.  
57  
58  
59  
60

- 1  
2  
3 28 Head SJ, Howell NJ, Osnabrugge RLJ, *et al.* The European Association for Cardio-  
4 Thoracic Surgery (EACTS) database: an introduction. *Eur J Cardiothorac Surg*  
5 2013;**44**:e175–e180.  
6  
7  
8  
9  
10  
11 29 Chadwick D, Kinsman R, Walton P. The British Association of Endocrine and  
12 Thyroid Surgeons 4th National Audit Report. 2012.  
13  
14  
15  
16  
17 30 Hazari A, Walton P. The UK National Flap Registry (UKNFR): A National Database  
18 for all pedicled and free flaps in the UK. *J Plast Reconstr Aesthet Surg*.  
19 2015;**68**:1633–1636.  
20  
21  
22  
23  
24  
25 31 Briggs V, Pitcher D, Shaw C, *et al.* UK Renal Registry 16th annual report: chapter  
26 14 2012 multisite dialysis access audit in England, Northern Ireland and Wales  
27 and 2011 PD one year follow-up: national and centre-specific analyses. *Nephron*  
28 *Clin Pract*. 2013;**125**:275–294.  
29  
30  
31  
32  
33  
34  
35 32 Connolly SS, Rochester MA. Nephroureterectomy surgery in the UK in 2012:  
36 British Association of Urological Surgeons (BAUS) Registry data. *BJU Int*  
37 2015;**116**:780–790.  
38  
39  
40  
41  
42  
43 33 Berven SH, Yaszemski MJ, Newton PO, *et al.* Introduction of new devices and  
44 technologies into a spine surgery practice: a review of processes and  
45 regulations. *Orthopedics* 2010;**33**:742–747.  
46  
47  
48  
49  
50  
51 34 Mason RH, Foley NM, Branley HM, *et al.* Pulmonary Langerhans cell  
52 histiocytosis (PLCH): a new UK register. *Thorax* 2014;**69**:766–767.  
53  
54  
55  
56  
57 35 Armitage JN, Irving SO, Burgess NA. Percutaneous nephrolithotomy in the  
58  
59  
60

- 1  
2  
3 United kingdom: results of a prospective data registry. *Eur Urol* 2012;**61**:1188–  
4  
5 1193.  
6  
7  
8  
9 36 Caskey F, Castledine C, Dawney A, *et al.* UK Renal Registry 18th Annual Report  
10  
11 2016.  
12  
13  
14 37 Auditbase. Advanced clinic management (2016).  
15  
16 <https://www.auditdata.com/all-products-and-services/clinic->  
17  
18 [management/auditbase](https://www.auditdata.com/all-products-and-services/clinic-) [accessed 23 October 2016]  
19  
20  
21  
22 38 Yung M, Gjuric M, Haeusler R, *et al.* An international otology database. *Otol*  
23  
24 *Neurotol* 2005;**26**:1087–1092.  
25  
26  
27  
28 39 Shakespeare PG, Bazire N, Whitworth IH. The UK breast implant registry-ten  
29  
30 years on. *Br J Plast Surg* 2005;**58**:283–285.  
31  
32  
33  
34 40 Bulusu VR, Fullarton J, Leahy M, *et al.* Rationale and design of a UK database for  
35  
36 a rare cancer type: the GEM Registry for gastrointestinal stromal tumours. *Br J*  
37  
38 *Cancer* 2013;**109**:1403–1407.  
39  
40  
41  
42 41 Elson DW, Dawson M, Wilson C, *et al.*. The UK Knee Osteotomy Registry  
43  
44 (UKKOR). *Knee* 2015;**22**:1–3.  
45  
46  
47  
48 42 Bates T, Kearins O, Monypenny I, *et al.* Clinical outcome data for symptomatic  
49  
50 breast cancer: the Breast Cancer Clinical Outcome Measures (BCCOM) Project.  
51  
52 *Br J Cancer* 2009;**101**:395–402.  
53  
54  
55  
56 43 Uberoi R, Das N, Moss J, *et al.* British Society of Interventional Radiology: Biliary  
57  
58 Drainage and Stenting Registry (BDSR). *Cardiovasc Intervent Radiol*  
59  
60



- 1  
2  
3 2012;**35**:127–138.  
4  
5  
6  
7 44 Thomas SM, Beard JD, Ireland M, *et al*. Results from the prospective registry of  
8  
9 endovascular treatment of abdominal aortic aneurysms (RETA): mid term  
10  
11 results to five years. *Eur J Vasc Endovasc Surg* 2005;**29**:563–570.  
12  
13  
14 45 Clinical Effectiveness Unit, The Royal College of Surgeons of England. National  
15  
16 Vascular Registry 2015 Annual Report.  
17  
18  
19  
20 46 de Steur WO, Henneman D, Allum WH, *et al*. Common data items in seven  
21  
22 European oesophagogastric cancer surgery registries: towards a European  
23  
24 upper GI cancer audit (EURECCA Upper GI). *Eur J Surg Oncol* 2014;**40**:325–329.  
25  
26  
27  
28 47 Breakwell LM. Understanding the need for spinal registries: Lee Breakwell  
29  
30 reviews the importance of registries in spinal research and explains why the  
31  
32 British Association of Spinal Surgeons (BASS) has decided to set up its own  
33  
34 registry. *Eur Spine J* 2013;**22 Suppl 1**:S5–S6.  
35  
36  
37  
38 48 Yung M, Heyning PV de. A prospective multicentre otology database. *Adv*  
39  
40 *Otorhinolaryngol* 2007;**65**:335–339.  
41  
42  
43  
44 49 Sher JL, Reed MR, Calvert P, *et al*. Influencing the national training agenda. The  
45  
46 UK & Ireland orthopaedic eLogbook. *J Bone Joint Surg Br* 2005;**87**:1182–1186.  
47  
48  
49  
50 50 Chalmers N, Jones K, Drinkwater K, *et al*. The UK nephrostomy audit. Can a  
51  
52 voluntary registry produce robust performance data? *Clin Radiol* 2008;**63**:888–  
53  
54 894.  
55  
56  
57  
58 51 Mangera A, B P. BAUS Section of Endourology national Uteroscopy audit:  
59  
60

- 1  
2  
3 setting the standards for revalidation. *Journal of clinical urology* 2013;6:45–49.  
4  
5  
6  
7 52 PELICAN cancer foundation. LOREC APE Perineal Wound Registry.  
8  
9 <http://www.lorec.nhs.uk/system/content.asp?pkey=17> [accessed 20 October  
10  
11 2016]  
12  
13  
14 53 Moat NE, Ludman P, de Belder MA, *et al.* Long-term outcomes after  
15  
16 transcatheter aortic valve implantation in high-risk patients with severe aortic  
17  
18 stenosis: the U.K. TAVI (United Kingdom Transcatheter Aortic Valve  
19  
20 Implantation) Registry. *J Am Coll Cardiol* 2011;58:2130–2138.  
21  
22  
23  
24 54 Briggs V, Pitcher D, Braddon F, *et al.* UK Renal Registry 15th annual report:  
25  
26 Chapter 8 UK multisite peritoneal dialysis access catheter audit for first PD  
27  
28 catheters 2011. *Nephron Clin Pract* 2013;123 Suppl 1:165–181.  
29  
30  
31  
32  
33 55 Franklin PD, Harrold L, Ayers DC. Incorporating patient-reported outcomes in  
34  
35 total joint arthroplasty registries: challenges and opportunities. *Clin Orthop*  
36  
37 *Relat Res* 2013;471:3482–3488.  
38  
39  
40  
41 56 Bates T, Kearins O, Monypenny I, *et al.* Clinical outcome data for symptomatic  
42  
43 breast cancer: the Breast Cancer Clinical Outcome Measures (BCCOM) Project.  
44  
45 *Br J Cancer* 2009;101:395–402.  
46  
47  
48  
49 57 National Bowel Cancer Audit Project Team. The National Bowel Cancer Audit  
50  
51 report 2015.  
52  
53  
54  
55 58 Health and Social Care Information Centre. National Head and Neck Cancer  
56  
57 Audit 2014.  
58  
59  
60

- 1  
2  
3 59 Head SJ, Howell NJ, Osnabrugge RLJ, *et al.* The European Association for Cardio-  
4 Thoracic Surgery (EACTS) database: an introduction. *Eur J Cardiothorac Surg*  
5 2013;**44**:e175–e180.  
6  
7  
8  
9  
10  
11 60 Clarke DR, Breen LS, Jacobs ML, *et al.* Verification of data in congenital cardiac  
12 surgery. *Cardiol Young* 2008;**18 Suppl 2**:177–187.  
13  
14  
15  
16  
17 61 Hickey GL, Cosgriff R, Grant SW, *et al.* A technical review of the United Kingdom  
18 National Adult Cardiac Surgery Governance Analysis 2008-11. *Eur J Cardiothorac*  
19 *Surg* 2014;**45**:225–233.  
20  
21  
22  
23  
24  
25 62 Bridgewater B. Cardiac registers: the adult cardiac surgery register. *Heart*  
26 2010;**96**:1441–1443.  
27  
28  
29  
30  
31 63 Jacobs ML, Jacobs JP, Franklin RCG, *et al.* Databases for assessing the outcomes  
32 of the treatment of patients with congenital and paediatric cardiac disease--the  
33 perspective of cardiac surgery. *Cardiol Young* 2008;**18 Suppl 2**:101–115.  
34  
35  
36  
37  
38  
39 64 Wyatt MG. Registries versus trials for the evaluation of the endovascular  
40 treatment of abdominal aortic aneurysms. *Eur J Vasc Endovasc Surg*  
41 2005;**29**:560–562.  
42  
43  
44  
45  
46  
47 65 Biancari F, Ruggieri VG, Perrotti A, *et al.* European Multicenter Study on  
48 Coronary Artery Bypass Grafting (E-CABG registry): Study Protocol for a  
49 Prospective Clinical Registry and Proposal of Classification of Postoperative  
50 Complications. *J Cardiothorac Surg* 2015;**10**:90.  
51  
52  
53  
54  
55  
56  
57 66 Chou E, Abboudi H, Shamim Khan M, *et al.* Should surgical outcomes be  
58  
59  
60

- 1  
2  
3 published? *J R Soc Med* 2015;**108**:127–135.  
4  
5  
6  
7 67 Divecha HM, Siddique I, Breakwell LM, *et al.* Complications in spinal deformity  
8 surgery in the United Kingdom: 5-year results of the annual British Scoliosis  
9 Society National Audit of Morbidity and Mortality. *Eur Spine J* 2014;**23**  
10  
11 **Suppl1**:S55–S60.  
12  
13  
14  
15  
16  
17 68 Sharma S, Dreghorn CR. Registry of shoulder arthroplasty - the Scottish  
18 experience. *Ann R Coll Surg Engl* 2006;**88**:122–126.  
19  
20  
21  
22  
23 69 Hussey K, Siddiqui T, Burton P, *et al.* Understanding administrative abdominal  
24 aortic aneurysm mortality data. *Eur J Vasc Endovasc Surg* 2015;**49**:277–282.  
25  
26  
27  
28  
29 70 Hopkins J, Welbourn R. The importance of national registries/databases in  
30 metabolic surgery: the UK experience. *Surg Obes Relat Dis* 2016;**12**:1178–1185.  
31  
32  
33  
34 71 Goldberg AJ, MacGregor A, Spencer SA. An information revolution in  
35 orthopaedics. *J Bone Joint Surg Br* 2012;**94**:454–458.  
36  
37  
38  
39  
40 72 Knight JS, Senapati A, Lamparelli MJ. National UK audit of procedure for  
41 prolapsing haemorrhoids on behalf of the Association of Coloproctology of  
42 Great Britain and Ireland. *Colorectal Dis* 2008;**10**:440–445.  
43  
44  
45  
46  
47  
48 73 Health and Social Care Information Centre. Information Governance Toolkit.  
49  
50 <https://www.igt.hscic.gov.uk> [accessed 23 March 2016]  
51  
52  
53  
54 74 Patrick H, Sims A, Burn J, *et al.* Monitoring the use and outcomes of new devices  
55 and procedures: how does coding affect what Hospital Episode Statistics  
56 contribute? Lessons from 12 emerging procedures 2006-10. *J Public Health*  
57  
58  
59  
60

- 1  
2  
3 (Oxf) 2013;**35**:132–138.  
4  
5  
6  
7 75 Larsson S, Lawyer P, Garellick G, *et al*. Use of 13 disease registries in 5 countries  
8 demonstrates the potential to use outcome data to improve health care's value.  
9  
10  
11 *Health Aff (Millwood)* 2012;**31**:220–227.  
12  
13  
14 76 O'Dowd A. Government considers a national implant register in review of  
15 cosmetic procedures. *BMJ* 2012;**345**:e5574.  
16  
17  
18  
19  
20 77 Sabah SA, Henckel J, Koutsouris S, *et al*. Are all metal-on-metal hip revision  
21 operations contributing to the National Joint Registry implant survival curves? :  
22 a study comparing the London Implant Retrieval Centre and National Joint  
23 Registry datasets. *Bone Joint J* 2016;**98-B**:33–39.  
24  
25  
26  
27  
28  
29  
30 78 Suradi HS, Hijazi ZM. TAVR update: Contemporary data from the UK TAVI and  
31 US TVT registries. *Glob Cardiol Sci Pract* 2015;**2015**:21.  
32  
33  
34  
35  
36 79 van Gijn W, van de Velde CJH. Quality assurance through outcome registration  
37 in colorectal cancer: an ECCO initiative for Europe. *Acta Chir Iugosl* 2010;**57**:17–  
38 21.  
39  
40  
41  
42  
43  
44 80 McCulloch P, Cook JA, Altman DG, *et al*. IDEAL framework for surgical  
45 innovation 1: the idea and development stages. *BMJ* 2013;**346**:f3012.  
46  
47  
48  
49  
50 81 NHS Commissioning Board. Clinical Commissioning Policy: Active Middle Ear  
51 Implants. [https://www.england.nhs.uk/commissioning/wp-](https://www.england.nhs.uk/commissioning/wp-content/uploads/sites/12/2013/04/d09-ps-a.pdf)  
52 content/uploads/sites/12/2013/04/d09-ps-a.pdf [accessed 13 November 2016]  
53  
54  
55  
56  
57  
58  
59  
60

**Table 1: Data column headings and their descriptions**

| Dataset column headings                | Description                                                                                     |
|----------------------------------------|-------------------------------------------------------------------------------------------------|
| Author(s)                              | Author of article                                                                               |
| Title                                  | Title of article                                                                                |
| Year                                   | Year of publication                                                                             |
| Name of registry                       | Name of registry                                                                                |
| Type of surgery                        | Operation(s) captured by the registry                                                           |
| Collaborations                         | Collaborations developed for the registry                                                       |
| Registry leadership and management     | How the registry was managed and/or lead                                                        |
| Objective(s)                           | The objective(s) of the registry                                                                |
| Registry development and/or design     | How the registry was developed and/or designed                                                  |
| Funding                                | How the registry was funded                                                                     |
| Rationale behind dataset               | The rationale behind selecting the registry dataset                                             |
| Dataset                                | The dataset of the registry                                                                     |
| Data processing                        | How the registry data were processed                                                            |
| Strategies to increase data completion | Strategies used/found by the registry to increase data completion                               |
| Data reporting                         | How the registry reported/disseminated their results                                            |
| Patient involvement                    | How patients were involved in the registry and viewpoints on patient involvement in registries. |
| Difficulties encountered/challenges    | Difficulties and challenges encountered by the registry                                         |
| Benefits of registries                 | The benefits of the registry                                                                    |
| Measures of a successful registry      | Factors that determine a successful registry                                                    |
| Legal factors, ethics and data access  | Legal factors, ethics and data access for the registry                                          |

1  
2  
3  
4  
5  
6  
7  
8  
9  
10  
11  
12  
13  
14  
15  
16  
17  
18  
19  
20  
21  
22  
23  
24  
25  
26  
27  
28  
29  
30  
31  
32  
33  
34  
35  
36  
37  
38  
39  
40  
41  
42  
43  
44  
45  
46  
47  
48  
49  
50  
51  
52  
53  
54  
55  
56  
57  
58  
59  
60

**Table 2: Represented surgical specialities**

| <b>Surgical specialty</b> |
|---------------------------|
| Orthopaedics              |
| Renal Surgery             |
| Neurosurgery              |
| Cardiac Surgery           |
| Upper GI Surgery          |
| Urology                   |
| Plastic Surgery           |
| Breast Surgery            |
| Colorectal Surgery        |
| Cardiothoracic Surgery    |
| Vascular Surgery          |
| Endocrine surgery         |
| ENT Surgery               |

For peer review only

Table 3: The data-items collected by the majority of UK surgical registries

| Pre-operative                            | Operative                                 | Post-operative                     |
|------------------------------------------|-------------------------------------------|------------------------------------|
| Name of centre                           | Name of operation                         | Outcome data specific to operation |
| Patient identifier                       | Time to surgery from first appointment    | QOL/PRO outcome measure            |
| Patient demographics                     | Type of anaesthetic (local or general)    | Date of discharge                  |
| Patient co-morbidities                   | ASA grade                                 | Length of stay                     |
| Whether discussed at MDT meeting         | Thromboprophylaxis regimen                | Complications                      |
| Indication for surgery                   | Primary or revision case                  | Morbidity                          |
| Date of diagnosis                        | Elective or emergency surgery             | Mortality (and cause)              |
| Pre-operative investigations and results | Date of surgery                           | Dates of follow-up                 |
| Date of admission                        | In or out of regular hospital hours       | Follow-up outcomes                 |
| GP information                           | Site/side of surgery                      | Need for further treatment         |
|                                          | Surgical technique/approach               | Need for further surgery           |
|                                          | Difficulty of procedure                   | ITU admission (planned/unplanned)  |
|                                          | Intraoperative problems                   | Destination of discharge           |
|                                          | Date of consent                           |                                    |
|                                          | Grade of surgeon                          |                                    |
|                                          | Surgical time                             |                                    |
|                                          | Funding for operation (NHS/private)       |                                    |
|                                          | Use of antibiotics                        |                                    |
|                                          | Type of implant and implant serial number |                                    |

GP General Practitioner, MDT multidisciplinary team, ASA American Society of Anaesthesiologists, QOL quality of life, PRO patient reported outcome, ITU intensive therapy unit



1  
2  
3  
4  
5  
6  
7  
8  
9  
10  
11  
12  
13  
14  
15  
16  
17  
18  
19  
20  
21  
22  
23  
24  
25  
26  
27  
28  
29  
30  
31  
32  
33  
34  
35  
36  
37  
38  
39  
40  
41  
42  
43  
44  
45  
46  
47  
48  
49  
50  
51  
52  
53  
54  
55  
56  
57  
58  
59  
60

**Figure legends**

Figure 1: PRISMA Diagram

Figure 2: Overview of the key steps required for the development of a successful UK surgical registry

For peer review only

1  
2  
3  
4  
5  
6  
7  
8  
9  
10  
11  
12  
13  
14  
15  
16  
17  
18  
19  
20  
21  
22  
23  
24  
25  
26  
27  
28  
29  
30  
31  
32  
33  
34  
35  
36  
37  
38  
39  
40  
41  
42  
43  
44  
45  
46  
47  
48  
49  
50  
51  
52  
53  
54  
55  
56  
57  
58  
59  
60

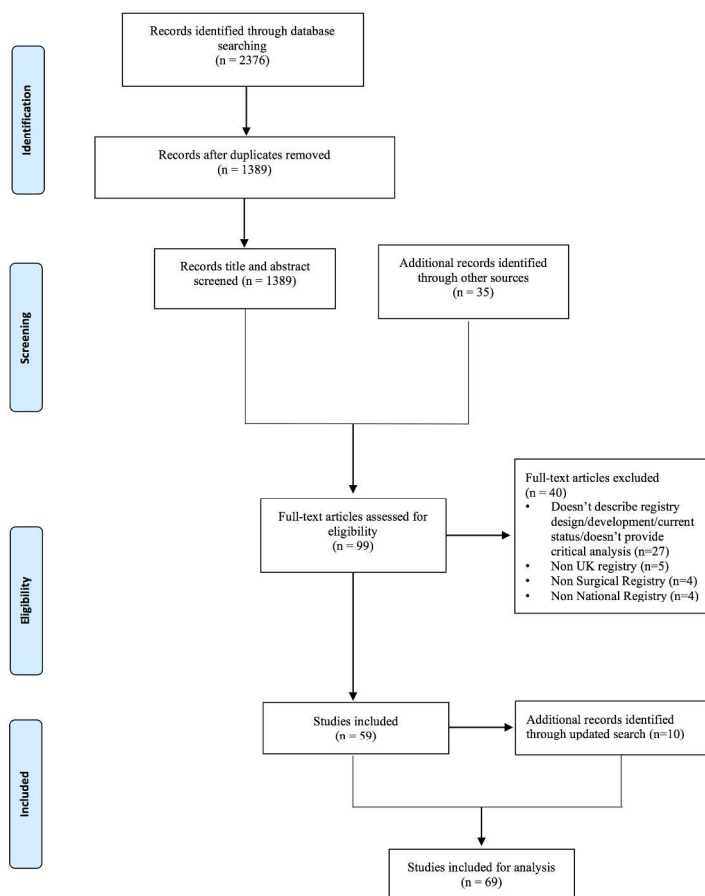

Figure 1

209x296mm (300 x 300 DPI)

1  
2  
3  
4  
5  
6  
7  
8  
9  
10  
11  
12  
13  
14  
15  
16  
17  
18  
19  
20  
21  
22  
23  
24  
25  
26  
27  
28  
29  
30  
31  
32  
33  
34  
35  
36  
37  
38  
39  
40  
41  
42  
43  
44  
45  
46  
47  
48  
49  
50  
51  
52  
53  
54  
55  
56  
57  
58  
59  
60

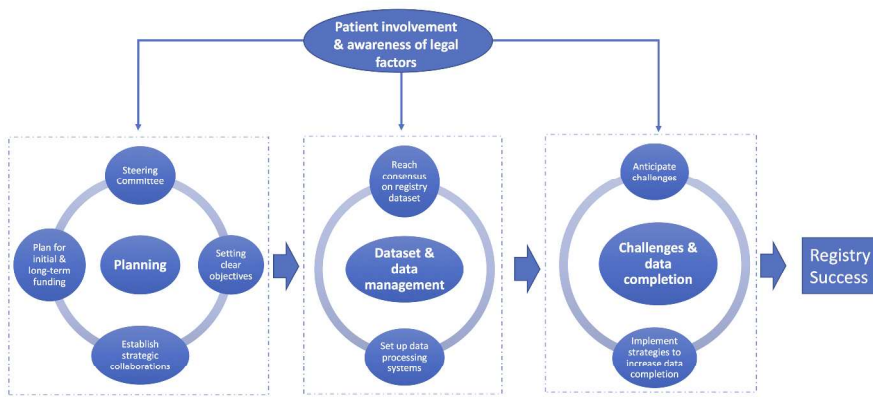

Figure 2

338x190mm (300 x 300 DPI)

review only

## Appendix 1

Ovid Medline and Embase search strategy:

1. (britain\$ OR "united kingdom\$" OR uk or england\$ OR northern ireland\$ OR wales\$ OR scotland\$).mp. [mp=ti, ab, hw, tn, ot, dm, mf, dv, kw, fx, nm, kf, px, rx, an, ui, sy]
2. (surgery OR surgical).mp. [mp=ti, ab, hw, tn, ot, dm, mf, dv, kw, fx, nm, kf, px, rx, an, ui, sy]
3. (register OR registers OR registry OR registries).mp. [mp=ti, ab, hw, tn, ot, dm, mf, dv, kw, fx, nm, kf, px, rx, an, ui, sy]
4. 1 AND 2 AND 3

| A                                                                | B                                                                                                                                  | C    | D                                                                     | E                                                | F              | G                                                                                      | H                                                                                                                                                                                                                                            | I                               | J                                                                                                                                                                                                                                                                       | K                                                                                                                                                                                                                                                                                      | L                                                                                                                                                                                                                                                                                                                                                                                                                                                          | M                                                                 | N                                                                                                                                                                                                                                                                                                                                                                                                                                                                                               | O                                                                                                                                                                                                                                                                                                                                                                                                                                                         | P              | Q                                 | R                                        | S                      | T                                 | U                                                                     |
|------------------------------------------------------------------|------------------------------------------------------------------------------------------------------------------------------------|------|-----------------------------------------------------------------------|--------------------------------------------------|----------------|----------------------------------------------------------------------------------------|----------------------------------------------------------------------------------------------------------------------------------------------------------------------------------------------------------------------------------------------|---------------------------------|-------------------------------------------------------------------------------------------------------------------------------------------------------------------------------------------------------------------------------------------------------------------------|----------------------------------------------------------------------------------------------------------------------------------------------------------------------------------------------------------------------------------------------------------------------------------------|------------------------------------------------------------------------------------------------------------------------------------------------------------------------------------------------------------------------------------------------------------------------------------------------------------------------------------------------------------------------------------------------------------------------------------------------------------|-------------------------------------------------------------------|-------------------------------------------------------------------------------------------------------------------------------------------------------------------------------------------------------------------------------------------------------------------------------------------------------------------------------------------------------------------------------------------------------------------------------------------------------------------------------------------------|-----------------------------------------------------------------------------------------------------------------------------------------------------------------------------------------------------------------------------------------------------------------------------------------------------------------------------------------------------------------------------------------------------------------------------------------------------------|----------------|-----------------------------------|------------------------------------------|------------------------|-----------------------------------|-----------------------------------------------------------------------|
| Author                                                           | Title                                                                                                                              | Year | Name of registry/type of paper                                        | Type of surgery                                  | Collaborations | Registry leadership and management                                                     | Objective(s)                                                                                                                                                                                                                                 | Registry development and design | Funding                                                                                                                                                                                                                                                                 | Rationale behind dataset                                                                                                                                                                                                                                                               | Dataset                                                                                                                                                                                                                                                                                                                                                                                                                                                    | Data processing                                                   | Strategies to increase data completion                                                                                                                                                                                                                                                                                                                                                                                                                                                          | Data completeness                                                                                                                                                                                                                                                                                                                                                                                                                                         | Data reporting | Patient involvement               | Difficulties encountered/challenges      | Benefits of registries | Measures of a successful registry | Legal factors, ethics and data access                                 |
| Gabr A.<br>O'Leary S.<br>Spalding T.<br>Bollen S.<br>Haddad F.   | The UK National Ligament Registry Report 2015                                                                                      | 2015 | UK National Ligament Registry (NLR)                                   | Anterior cruciate ligament reconstruction (ACLR) | NS             | Steering committee group comprising of surgeons - no initial involvement of government | To collect relevant demographic data, identify current or emergent trends in practice, identify failing techniques/devices at the earliest opportunity, provide functional outcome data and complication rates, improve the standard of care | Web based platform              | Involving physical therapists with enrich dataset. Industry (6 companies, priming grant from British Association for Knee Surgery BASK) - Industry will be provided with information on the performance of their products. They will not be able to access the raw data | Need to have a balance between level of ideal data and what surgeons and patients can easily submit. The data set allows comparison and communication with existing registries as well as allowing potential 'generic health benefit' comparisons with other non-orthopedic procedures | Demographics, cause of injury, time from injury to surgery; graft data (type of graft, diameter), BMI, surgical technique; outcome data relating to ACLR, knee injury and osteoarthritis outcome score, subjective International Knee Documentation Committee, Euroqol (EQSD) and the Tegner activity score, in which centre procedure performed.                                                                                                          | NS                                                                | User-friendly web based platform - easily accessible via computer or tablet, simplifying the process for clinicians and patients; Has a registry 'route' - requiring small contributions from patients and surgeons at different stages; Has automatic prompts for patients to fill in their information at scheduled times of treatment and rehabilitation, taking the hassle and stress out of clinical data collection for clinicians; Readymade tool for use in governance and revalidation | 17,800 completed forms. 2854 ACLR procedures registered between Dec 2012 and Feb 2015. Estimated that there are 30,000 patients a year in the UK undergoing ACLR                                                                                                                                                                                                                                                                                          | NS             | Patients can insert data via apps | NS                                       | NS                     | NS                                | May be useful to introduce mobile apps for surgeons use to enter data |
| Hing C.B.<br>Stiehl J.B.                                         | Editorial                                                                                                                          | 2015 | Commentary                                                            | NS                                               | NS             | NS                                                                                     | NS                                                                                                                                                                                                                                           | NS                              | NS                                                                                                                                                                                                                                                                      | NS                                                                                                                                                                                                                                                                                     | NS                                                                                                                                                                                                                                                                                                                                                                                                                                                         | Registries rely on accurate robust data entry and correct support | NS                                                                                                                                                                                                                                                                                                                                                                                                                                                                                              | NS                                                                                                                                                                                                                                                                                                                                                                                                                                                        | NS             | NS                                | NS                                       | NS                     | NS                                | NS                                                                    |
| Briggs V.<br>Pitcher D.<br>Braddon F.<br>Fogarty D.<br>Wilkie M. | UK renal registry 15th annual report: Chapter 8 UK multisite peritoneal dialysis access catheter audit for first PD catheters 2011 | 2011 | UK renal registry Multisite peritoneal dialysis access catheter audit | Peritoneal dialysis access.                      | NS             | NS                                                                                     | Data acquisition relating to peritoneal dialysis functionality and access                                                                                                                                                                    | NS                              | Health quality improvement partnership (HQIIP)                                                                                                                                                                                                                          | Data fields were refined from existing renal registry tables. Data fields were adjusted based on meetings with a multisite audit group including patient representation.                                                                                                               | Demographic data, age at first dialysis of each centre, size of centre, referral time/interval, underlying disease, catheter insertion technique, referral time, commencement date of dialysis, deprivation quintiles, catheter survival at 3 months, length of time known to nephrology service, date catheter used, date of catheter failure, BMI, date seen by renal physician, surgical referral, peritoneal dialysis catheter outcomes, complications | Excel spreadsheets circulated by the UK renal registry.           | NS                                                                                                                                                                                                                                                                                                                                                                                                                                                                                              | 43/65 centres contacted submitted data. Data completeness by center ranged from 0% to 100% for almost all data fields that were collected. Data RE: underlying renal disease not available for 13% of patients. Data not available from some renal networks RE referral time. *considerable missing data* RE surgical referral. Missing data RE insertion technique in 37 patients. Missing data in 209/916 patients RE whether or not they were diabetic | NS             | NS                                | Patient involved in refining data fields | NS                     | NS                                | NS                                                                    |

1  
2  
3  
4  
5  
6  
7  
8  
9  
10  
11  
12  
13  
14  
15  
16  
17  
18  
19  
20  
21  
22  
23  
24  
25  
26  
27  
28  
29  
30  
31  
32  
33  
34  
35  
36  
37  
38  
39  
40  
41  
42  
43  
44  
45  
46  
47

|                |                                                                                                                                                                                                    |      |                                                   |                                          |    |    |                                                                                                         |    |       |                                                                                                                                                                                                                            |                                                                                                                                                                                                                                            |                                                                                                                                                    |                                                                                                                      |               |    |                                                                                                                                                 |                                                                                                                                                                                                                         |    |    |    |
|----------------|----------------------------------------------------------------------------------------------------------------------------------------------------------------------------------------------------|------|---------------------------------------------------|------------------------------------------|----|----|---------------------------------------------------------------------------------------------------------|----|-------|----------------------------------------------------------------------------------------------------------------------------------------------------------------------------------------------------------------------------|--------------------------------------------------------------------------------------------------------------------------------------------------------------------------------------------------------------------------------------------|----------------------------------------------------------------------------------------------------------------------------------------------------|----------------------------------------------------------------------------------------------------------------------|---------------|----|-------------------------------------------------------------------------------------------------------------------------------------------------|-------------------------------------------------------------------------------------------------------------------------------------------------------------------------------------------------------------------------|----|----|----|
| Divacha H.M.   | Complications in spinal deformity surgery in the united kingdom.                                                                                                                                   | 2014 | British Scoliosis Society                         | Spinal defority surgeries                | NS | NS | Provide an overview of corrective spinal deformity surgery including case volume and complication rates | NS | NS    | etiological and outcome data. Number of surgeries performed, demographics, aetiology (idiopathic vs non-idiopathic), complications (mortality, deep infections, neurological deficit), in which centre procedure performed | Individual units were approached on an annual basis and asked to submit data (voluntarily). Data was submitted electronically                                                                                                              | It may be necessary to make it mandatory to submit morbidity and mortality data to ensure accurate, representative and nationwide data collection. | 82% of centres (51 centres). The number of contributing units and cases increased yearly throughout the study period | NS            | NS | Relied on voluntary data submission by individual centres leading to potential reporting bias where complication rates could be underestimated. | Help when consenting patients in terms of complication rates. Help provide a benchmark for units in the UK to compare their complication rates against national averages.                                               | NS |    |    |
| Siddique I.    | Five year results of the annual british scoliosis society national audit of morbidity & mortality                                                                                                  |      |                                                   |                                          |    |    |                                                                                                         |    |       |                                                                                                                                                                                                                            |                                                                                                                                                                                                                                            |                                                                                                                                                    |                                                                                                                      |               |    |                                                                                                                                                 |                                                                                                                                                                                                                         |    |    |    |
| Breakwell L.M. |                                                                                                                                                                                                    |      |                                                   |                                          |    |    |                                                                                                         |    |       |                                                                                                                                                                                                                            |                                                                                                                                                                                                                                            |                                                                                                                                                    |                                                                                                                      |               |    |                                                                                                                                                 |                                                                                                                                                                                                                         |    |    |    |
| Millner P.A.   |                                                                                                                                                                                                    |      |                                                   |                                          |    |    |                                                                                                         |    |       |                                                                                                                                                                                                                            |                                                                                                                                                                                                                                            |                                                                                                                                                    |                                                                                                                      |               |    |                                                                                                                                                 |                                                                                                                                                                                                                         |    |    |    |
| Briggs V.      | UK renal registry 16th annual report: Chapter 14 2012 multisite dialysis access audit in England, Northern Ireland and Wales and 2011 PD one year follow-up: National and centre-specific analyses | 2012 | UK renal registry Multisite dialysis access audit | Vascular and peritoneal dialysis access. | NS | NS | Examine practice patterns of dialysis access and highlight variations in practice between renal centres | NS | HQUIP | NS                                                                                                                                                                                                                         | Patient demographics, details of access failure, type of access, first access type used, insertion technique, referral time, type of renal disease, whether pt had surgical assessment, in which centre access was obtained, complications | Excel spreadsheets circulated by the UK renal registry.                                                                                            | NS                                                                                                                   | 51/62 centres | NS | NS                                                                                                                                              | Data collection was not optimal with significant amounts of missing information across range of data fields. There were ambiguities in data fields which need to be refined to simplify collection and improve accuracy | NS | NS | NS |
| Pitcher D.     |                                                                                                                                                                                                    |      |                                                   |                                          |    |    |                                                                                                         |    |       |                                                                                                                                                                                                                            |                                                                                                                                                                                                                                            |                                                                                                                                                    |                                                                                                                      |               |    |                                                                                                                                                 |                                                                                                                                                                                                                         |    |    |    |
| Shaw C.        |                                                                                                                                                                                                    |      |                                                   |                                          |    |    |                                                                                                         |    |       |                                                                                                                                                                                                                            |                                                                                                                                                                                                                                            |                                                                                                                                                    |                                                                                                                      |               |    |                                                                                                                                                 |                                                                                                                                                                                                                         |    |    |    |
| Fluck R.       |                                                                                                                                                                                                    |      |                                                   |                                          |    |    |                                                                                                         |    |       |                                                                                                                                                                                                                            |                                                                                                                                                                                                                                            |                                                                                                                                                    |                                                                                                                      |               |    |                                                                                                                                                 |                                                                                                                                                                                                                         |    |    |    |
| Wilkie M.      |                                                                                                                                                                                                    |      |                                                   |                                          |    |    |                                                                                                         |    |       |                                                                                                                                                                                                                            |                                                                                                                                                                                                                                            |                                                                                                                                                    |                                                                                                                      |               |    |                                                                                                                                                 |                                                                                                                                                                                                                         |    |    |    |

For peer review only

1  
2  
3  
4  
5  
6  
7  
8  
9  
10  
11  
12  
13  
14  
15  
16  
17  
18  
19  
20  
21  
22  
23  
24  
25  
26  
27  
28  
29  
30  
31  
32  
33  
34  
35  
36  
37  
38  
39  
40  
41  
42  
43  
44  
45  
46  
47

|              |                                                                              |      |                                                                                                                    |                                                                                                      |                                                                                                                                                                              |                                                                                                                                                                                                                                                                                                                                                                                                                                                                                    |                                                                                                                                                                                                                                                                                                                                                                                                                                                                                                                                                                                                                                                                                                                                                                                                                              |                                                                                                                                                                                                                                                                                                                                                                                                                                                                                                                                                                                                                                                                                                                                                                         |                                                                                                                                                                                              |          |                                                                                                                                                                                                                                                                                                                                                                                                                                                                                                                                                                                                                                                                                                                                                                                                                                                                                                                                                                                                                                                                                                                                                                                                                                                                                                                                                                                                      |    |                |                                                                                                                                                                                                                                                                                                                          |    |    |    |    |                                                                                                                                                                                                                                                                                                                                            |
|--------------|------------------------------------------------------------------------------|------|--------------------------------------------------------------------------------------------------------------------|------------------------------------------------------------------------------------------------------|------------------------------------------------------------------------------------------------------------------------------------------------------------------------------|------------------------------------------------------------------------------------------------------------------------------------------------------------------------------------------------------------------------------------------------------------------------------------------------------------------------------------------------------------------------------------------------------------------------------------------------------------------------------------|------------------------------------------------------------------------------------------------------------------------------------------------------------------------------------------------------------------------------------------------------------------------------------------------------------------------------------------------------------------------------------------------------------------------------------------------------------------------------------------------------------------------------------------------------------------------------------------------------------------------------------------------------------------------------------------------------------------------------------------------------------------------------------------------------------------------------|-------------------------------------------------------------------------------------------------------------------------------------------------------------------------------------------------------------------------------------------------------------------------------------------------------------------------------------------------------------------------------------------------------------------------------------------------------------------------------------------------------------------------------------------------------------------------------------------------------------------------------------------------------------------------------------------------------------------------------------------------------------------------|----------------------------------------------------------------------------------------------------------------------------------------------------------------------------------------------|----------|------------------------------------------------------------------------------------------------------------------------------------------------------------------------------------------------------------------------------------------------------------------------------------------------------------------------------------------------------------------------------------------------------------------------------------------------------------------------------------------------------------------------------------------------------------------------------------------------------------------------------------------------------------------------------------------------------------------------------------------------------------------------------------------------------------------------------------------------------------------------------------------------------------------------------------------------------------------------------------------------------------------------------------------------------------------------------------------------------------------------------------------------------------------------------------------------------------------------------------------------------------------------------------------------------------------------------------------------------------------------------------------------------|----|----------------|--------------------------------------------------------------------------------------------------------------------------------------------------------------------------------------------------------------------------------------------------------------------------------------------------------------------------|----|----|----|----|--------------------------------------------------------------------------------------------------------------------------------------------------------------------------------------------------------------------------------------------------------------------------------------------------------------------------------------------|
| Kollias M.S. | Proposal for establishment of the UK cranial reconstruction registry (UKCRR) | 2014 | UK Cranial Reconstruction registry (UKCRR). Proposal for the establishment of a UK cranial reconstruction registry | Cranioplasty Reconstruction of the skull vault with autologous bone, titanium or synthetic material. | British Neurotrauma Group, the British Neurosurgical Trainee Research Collaborative (BNTRC), the UK Neurosurgical Research Network, Society of British Neurological Surgeons | Each participating unit will appoint a consultant and a trainee responsible for co-ordinating the UKCRR at a local level. The UKCRR Steering Committee will have the overall responsibility for oversight of the registry. Steering Committee meetings to assess progress will take place at 6 and 12 months after the national rollout. A Steering Committee, which will include stakeholders will be responsible for overseeing the strategic direction and running of the UKCRR | To monitor practice patterns, complication rates and establish benchmarks for future studies. To provide information on variations in practice and outcomes between different units. To generate hypotheses for future research studies. Ultimate aim is to improve outcomes for patients. Specific objectives of the UKCRR are to: Monitor the demography, contemporary practice patterns, long-term clinical outcome and complication rates of cranioplasties across the UK. 2) Collect PROMs with a special focus on functional outcome, quality of life and satisfaction with cosmesis. 3) Provide aggregate data of implant usage and lifespan (implant survival) for long-term surveillance to manufacturers (commercial and in-house), clinicians, healthcare planners, regulatory authorities and other stakeholders | The UKCRR will be developed under the auspices of the British Neurotrauma Group (a special interest group of the Society of British Neurological Surgeons), the British Neurosurgical Trainee Research Collaborative (BNTRC) and the UK Neurosurgical Research Network. The registry will operate under the umbrella of the National Neurosurgical Audit Programme of the Society of British Neurological Surgeons. The feasibility of prospective data collection will be piloted in a number of selected units to refine the dataset on user experience and feedback. The pilot phase is expected to last 2-3 months. The principles of the UKCRR were discussed and agreed during past meetings of the British Neurotrauma Group and the launch meeting of the BNTRC | Cost of development and maintenance to be met by participating hospitals with supplier contributions using the UK shunt registry funding model. Industry will make some funding contribution | BMJ Open | Demographics, indication for craniectomy, site of skin incision, material used for duroplasty, type of material laid over the brain, time interval between craniectomy and cranioplasty, comorbidities, ASA class, neurological status, PROMs (functional outcome, quality of life, satisfaction with cosmesis). Operative data including: number of surgeons, grade of most senior surgeon, morning or afternoon operating list, size of cranial defect, site of cranioplasty, type of cranioplasty (including material, design and manufacturing), simultaneous insertion of CSF shunt (if applicable), surgical time, antibiotic prophylaxis, conventional or laminar flow ventilation theatre, wound infiltration with local anaesthetic, type of antiseptic used for skin preparation, distance of brain surface from inner table of skull, part of implant placed under temporis (if applicable), method used to secure implant, insertion of wound drain (suction or passive) and method for closing wound. Outcome measures: Re-operation due to a cranioplasty-related issue, surgical site infection, re-admission due to a cranioplasty-related issue, unplanned post-operative escalation of care, morbidity, length of stay, destination at discharge, mortality, neurological status, PROMs (functional outcome, quality of life, satisfaction with cosmesis) during routine follow-up | NS | Not active yet | Annual reports including a summary of cranioplasties (material, time interval after craniectomy, patient characteristics), outcomes post cranioplasty, description of key outcome indicators (i.e. risk-adjusted re-operation and surgical site infection) at unit level, description of data completeness at unit level | NS | NS | NS | NS | The ORION platform complies with the Department of Health Information Governance policies and standards for secure processing of patient healthcare data as set out in the Information Governance Toolkit of the Health and Social Care Information Centre. Each participating unit will be the data controller for its own submitted data |
|--------------|------------------------------------------------------------------------------|------|--------------------------------------------------------------------------------------------------------------------|------------------------------------------------------------------------------------------------------|------------------------------------------------------------------------------------------------------------------------------------------------------------------------------|------------------------------------------------------------------------------------------------------------------------------------------------------------------------------------------------------------------------------------------------------------------------------------------------------------------------------------------------------------------------------------------------------------------------------------------------------------------------------------|------------------------------------------------------------------------------------------------------------------------------------------------------------------------------------------------------------------------------------------------------------------------------------------------------------------------------------------------------------------------------------------------------------------------------------------------------------------------------------------------------------------------------------------------------------------------------------------------------------------------------------------------------------------------------------------------------------------------------------------------------------------------------------------------------------------------------|-------------------------------------------------------------------------------------------------------------------------------------------------------------------------------------------------------------------------------------------------------------------------------------------------------------------------------------------------------------------------------------------------------------------------------------------------------------------------------------------------------------------------------------------------------------------------------------------------------------------------------------------------------------------------------------------------------------------------------------------------------------------------|----------------------------------------------------------------------------------------------------------------------------------------------------------------------------------------------|----------|------------------------------------------------------------------------------------------------------------------------------------------------------------------------------------------------------------------------------------------------------------------------------------------------------------------------------------------------------------------------------------------------------------------------------------------------------------------------------------------------------------------------------------------------------------------------------------------------------------------------------------------------------------------------------------------------------------------------------------------------------------------------------------------------------------------------------------------------------------------------------------------------------------------------------------------------------------------------------------------------------------------------------------------------------------------------------------------------------------------------------------------------------------------------------------------------------------------------------------------------------------------------------------------------------------------------------------------------------------------------------------------------------|----|----------------|--------------------------------------------------------------------------------------------------------------------------------------------------------------------------------------------------------------------------------------------------------------------------------------------------------------------------|----|----|----|----|--------------------------------------------------------------------------------------------------------------------------------------------------------------------------------------------------------------------------------------------------------------------------------------------------------------------------------------------|

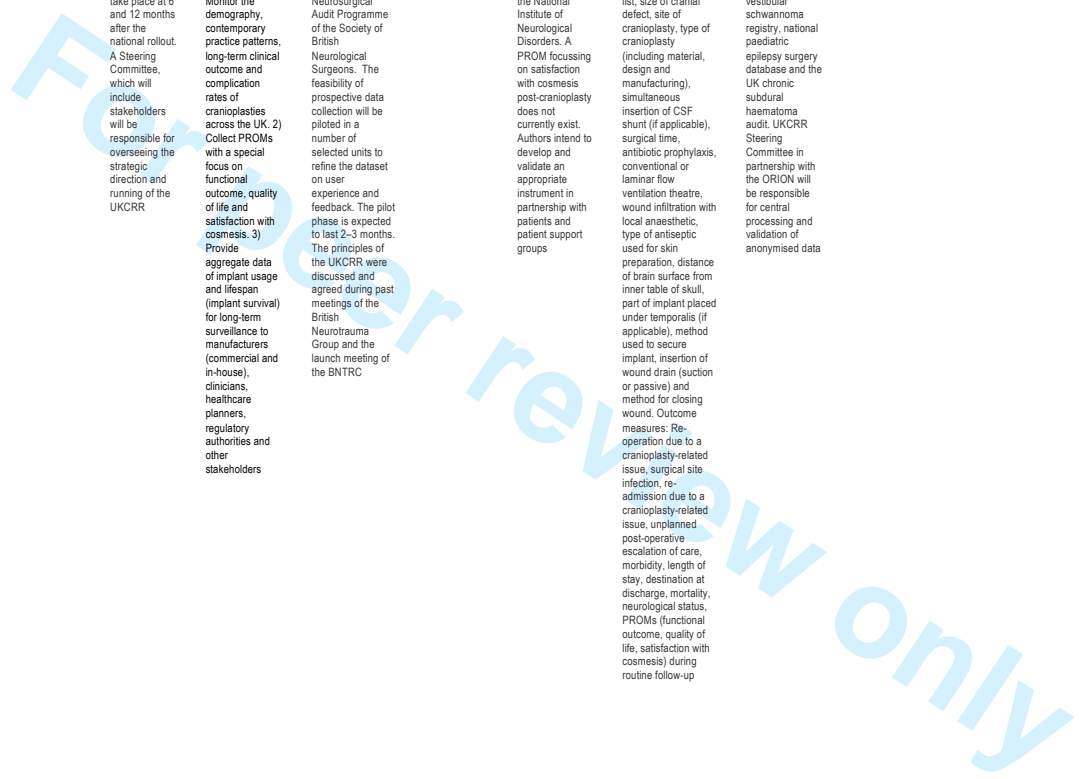

|             |                                                                        |      |                                                                                                                               |                                                                     |                                                                                                                                                                                                                                                                                                                                                                             |                                                                                                                                                                                                                                                                                                                                                                                                                                                                                                                                              |    |                                                                                         |                                                                                                                                                                                                                                                                                                                                                                                                                                                                                                                                                                                                                                                         |    |                                                                                                                                                                                                                                                                                                                                                                                                                                                                                                                                                                                                                                                                                                   |                                                                                                                                                                                                                                                                                                                                                                                                                                                                                                                                                                                                                                                                                                                                                                                                                                                                                                                                                                                                                                                                                                                                                                             |                                                                                                                                                                                                                                                                                                                                                                                                                                                                                                                                                                                                                                                                                                                                                                                                                                          |                                                  |                                                                                                                                              |    |                                                                                                                                                                                                                                                         |                                                                                                                                                                                                                                                                                                                                                                                                                                                                                                                                                                                                                                                                                                                                                                                                                                                                                                                                                                                                                                                                                                                                                                                                                            |                                                                                                                                                                                                                                                                                                                                                                                                                                                                                                                                                                                                                                                                                                                                                                                                                                                                                                                                                                                |
|-------------|------------------------------------------------------------------------|------|-------------------------------------------------------------------------------------------------------------------------------|---------------------------------------------------------------------|-----------------------------------------------------------------------------------------------------------------------------------------------------------------------------------------------------------------------------------------------------------------------------------------------------------------------------------------------------------------------------|----------------------------------------------------------------------------------------------------------------------------------------------------------------------------------------------------------------------------------------------------------------------------------------------------------------------------------------------------------------------------------------------------------------------------------------------------------------------------------------------------------------------------------------------|----|-----------------------------------------------------------------------------------------|---------------------------------------------------------------------------------------------------------------------------------------------------------------------------------------------------------------------------------------------------------------------------------------------------------------------------------------------------------------------------------------------------------------------------------------------------------------------------------------------------------------------------------------------------------------------------------------------------------------------------------------------------------|----|---------------------------------------------------------------------------------------------------------------------------------------------------------------------------------------------------------------------------------------------------------------------------------------------------------------------------------------------------------------------------------------------------------------------------------------------------------------------------------------------------------------------------------------------------------------------------------------------------------------------------------------------------------------------------------------------------|-----------------------------------------------------------------------------------------------------------------------------------------------------------------------------------------------------------------------------------------------------------------------------------------------------------------------------------------------------------------------------------------------------------------------------------------------------------------------------------------------------------------------------------------------------------------------------------------------------------------------------------------------------------------------------------------------------------------------------------------------------------------------------------------------------------------------------------------------------------------------------------------------------------------------------------------------------------------------------------------------------------------------------------------------------------------------------------------------------------------------------------------------------------------------------|------------------------------------------------------------------------------------------------------------------------------------------------------------------------------------------------------------------------------------------------------------------------------------------------------------------------------------------------------------------------------------------------------------------------------------------------------------------------------------------------------------------------------------------------------------------------------------------------------------------------------------------------------------------------------------------------------------------------------------------------------------------------------------------------------------------------------------------|--------------------------------------------------|----------------------------------------------------------------------------------------------------------------------------------------------|----|---------------------------------------------------------------------------------------------------------------------------------------------------------------------------------------------------------------------------------------------------------|----------------------------------------------------------------------------------------------------------------------------------------------------------------------------------------------------------------------------------------------------------------------------------------------------------------------------------------------------------------------------------------------------------------------------------------------------------------------------------------------------------------------------------------------------------------------------------------------------------------------------------------------------------------------------------------------------------------------------------------------------------------------------------------------------------------------------------------------------------------------------------------------------------------------------------------------------------------------------------------------------------------------------------------------------------------------------------------------------------------------------------------------------------------------------------------------------------------------------|--------------------------------------------------------------------------------------------------------------------------------------------------------------------------------------------------------------------------------------------------------------------------------------------------------------------------------------------------------------------------------------------------------------------------------------------------------------------------------------------------------------------------------------------------------------------------------------------------------------------------------------------------------------------------------------------------------------------------------------------------------------------------------------------------------------------------------------------------------------------------------------------------------------------------------------------------------------------------------|
| Hickey G.L. | Clinical registries: Governance, management, analysis and applications | 2013 | Review on establishing and managing registries. Uses many examples from National Adult Cardiac Surgery Audit (NACSA) registry | General review on registries but mainly focuses on cardiac registry | Stakeholders in NACSA registry, DoH commissioners, HQIP: The Healthcare Quality Improvement Partnership, SCTS (Society for Cardiothoracic Surgery in GB and Ireland), NICOR: National Institute for Cardiovascular Outcomes Research, NIGB: National Information Governance Board, Cardiac Surgery Centres, Surgeons, Database managers, Academic groups, Commercial groups | NACSA managed by National Institute of Cardiovascular Outcomes Research (NICOR). For NACSA database, most centres in the UK employ a local database manager who has responsibility for working with the surgeons to ensure that data collection is complete and robust. Database managers monitor data completeness rates and effective data management is a vital aspect of any large clinical registry. For registries to be effective, dedicated clinical input alongside high-level analytical and data management expertise is required | NS | This review covers the fundamentals of establishing and maintaining clinical registries | Registries require considerable resources, infrastructure and funding to survive long term. Funding can come from: government budgets; professional societies; local health-care commissioner s. The value of the data can be exploited as a source of revenue. The Society of Thoracic Surgeons (STS) have identified two revenue sources for their national database: (i) non-funded major or minor data requests and (ii) regional activities. The first source allows for researchers to access information from the database. The second would allow for regional governments to access high-quality reports in order to steer health-care policy. | NS | The NACSA dataset has 168 data fields. Half the fields are 'branched', meaning that they are only relevant for specific procedures. Fields are classified into patient identifiers, patient characteristics, medical history, preoperative measurements, intraoperative fields and postoperative fields. Cardiac and other cardiothoracic procedures are categorized into four major groups: coronary artery bypass graft (CABG), valve, major aortic and other cardiac procedures. Indication of a procedure within one of these groups unlocks further branched fields. For example, indicating a patient had a CABG procedure would unlock fields to allow completion of the number of grafts. | For NACSA: Data are collected through local specialised database systems developed either commercially or locally. The data remain in the individual centres for internal validation and local auditing. Data are then uploaded to central servers housed at NICOR. A sophisticated registry-import software tool flags data issues. Data are then merged into a single file structure and encrypted. Data then undergo cleaning and validation. It is very important to be able to clean the data. Simply removing records or fields that do not fully meet standards of accuracy and coherency will lead to an increase in bias. Data cleaning is the process of detecting and resolving data problems to improve data quality. Appropriate resources must be allocated to this process, which will usually require the attention of experienced clinicians and database managers. Data validation is important to ensure that the data are accurate for reporting. Following local and external validation, summaries of centre- and surgeon-specific data are returned to individual centres for validation. Following this, data can be released to the public domain. | Achieving and maintaining high participation rates rely heavily on the perceived value of the outputs generated. Keep the registry simple - as the number of records, data fields and complexity of the registry increases, the data decreases. Have comprehensive 'user guides' for contributors, technical and clinical training, feedback mechanisms and communication plans. Problems most commonly occur at the data input stage. Data inputted using handwritten data-forms are more likely to contain inaccurate information than software systems that capture the required dataset. Human error can also lead to data extractions for researchers being unknowingly corrupted. For example variables that list multiple options separated by a marker might be arbitrarily truncated, meaning that not all data are transmitted | The NACSA database contains over 450,000 records | Publishing mortality results by named centre/surgeon might encourage risk-averse clinical decision-making. However evidence is inconclusive. | NS | Examples of errors from NACSA include patients who have their heights recorded as negative values (e.g. -160cm), procedures on five valves, deceased patients being discharged home and aortic root replacements being performed on the abdominal aorta | Improves quality of patient care, underpins research, improves cost-effectiveness, provides information for regulatory process. Other benefits include improvements in informed patient decision making, improvements in treatment and advances in health-care research and governance. Since the NACSA registry was introduced, risk-adjusted in-hospital mortality in the UK has fallen by >50% despite more elderly and high-risk patients having surgery each year. It is increasingly accepted that the collection and feedback of data and publishing them openly, is an effective way of driving quality improvement. Registries can be used for audit purposes, surgical epidemiology, clinical hypothesis testing, risk-prediction models (eg in cardiac surgery used to estimate short term mortality post surgery), epidemiological research, health services research (including variations in patient access to care), and identification of health care inequalities. Clinical registries are considered the gold standard of observational data. There have been an increasing number of devices implanted into patients. Registries would allow the earlier detection of unacceptable failure rates eg PIP | The success of a clinical registry project can be measured on the database completeness s. Accessibility of information and proven usefulness can be a terminal event for any registry with potential criminal or political repercussions. There have been conflicting legal views on the interpretation of UK laws for practice in health-care research which has disrupted a number of registry projects due to lack of legal clarification. There should be ethical use of data and appropriate intellectual property rights. Data privacy should be maintained and data should be protected. Patients' personal data should be accurately collected and stored securely and not shared without appropriate permissions. It is important that any release of data (including to third parties responsible for analysis or publication) is done under a defined data-sharing agreement, whereby the security, planned uses, control and fate of the data are clearly defined |
|-------------|------------------------------------------------------------------------|------|-------------------------------------------------------------------------------------------------------------------------------|---------------------------------------------------------------------|-----------------------------------------------------------------------------------------------------------------------------------------------------------------------------------------------------------------------------------------------------------------------------------------------------------------------------------------------------------------------------|----------------------------------------------------------------------------------------------------------------------------------------------------------------------------------------------------------------------------------------------------------------------------------------------------------------------------------------------------------------------------------------------------------------------------------------------------------------------------------------------------------------------------------------------|----|-----------------------------------------------------------------------------------------|---------------------------------------------------------------------------------------------------------------------------------------------------------------------------------------------------------------------------------------------------------------------------------------------------------------------------------------------------------------------------------------------------------------------------------------------------------------------------------------------------------------------------------------------------------------------------------------------------------------------------------------------------------|----|---------------------------------------------------------------------------------------------------------------------------------------------------------------------------------------------------------------------------------------------------------------------------------------------------------------------------------------------------------------------------------------------------------------------------------------------------------------------------------------------------------------------------------------------------------------------------------------------------------------------------------------------------------------------------------------------------|-----------------------------------------------------------------------------------------------------------------------------------------------------------------------------------------------------------------------------------------------------------------------------------------------------------------------------------------------------------------------------------------------------------------------------------------------------------------------------------------------------------------------------------------------------------------------------------------------------------------------------------------------------------------------------------------------------------------------------------------------------------------------------------------------------------------------------------------------------------------------------------------------------------------------------------------------------------------------------------------------------------------------------------------------------------------------------------------------------------------------------------------------------------------------------|------------------------------------------------------------------------------------------------------------------------------------------------------------------------------------------------------------------------------------------------------------------------------------------------------------------------------------------------------------------------------------------------------------------------------------------------------------------------------------------------------------------------------------------------------------------------------------------------------------------------------------------------------------------------------------------------------------------------------------------------------------------------------------------------------------------------------------------|--------------------------------------------------|----------------------------------------------------------------------------------------------------------------------------------------------|----|---------------------------------------------------------------------------------------------------------------------------------------------------------------------------------------------------------------------------------------------------------|----------------------------------------------------------------------------------------------------------------------------------------------------------------------------------------------------------------------------------------------------------------------------------------------------------------------------------------------------------------------------------------------------------------------------------------------------------------------------------------------------------------------------------------------------------------------------------------------------------------------------------------------------------------------------------------------------------------------------------------------------------------------------------------------------------------------------------------------------------------------------------------------------------------------------------------------------------------------------------------------------------------------------------------------------------------------------------------------------------------------------------------------------------------------------------------------------------------------------|--------------------------------------------------------------------------------------------------------------------------------------------------------------------------------------------------------------------------------------------------------------------------------------------------------------------------------------------------------------------------------------------------------------------------------------------------------------------------------------------------------------------------------------------------------------------------------------------------------------------------------------------------------------------------------------------------------------------------------------------------------------------------------------------------------------------------------------------------------------------------------------------------------------------------------------------------------------------------------|

1  
2  
3  
4  
5  
6  
7  
8  
9  
10  
11  
12  
13  
14  
15  
16  
17  
18  
19  
20  
21  
22  
23  
24  
25  
26  
27  
28  
29  
30  
31  
32  
33  
34  
35  
36  
37  
38  
39  
40  
41  
42  
43  
44  
45  
46  
47





|    |                |                                                                                                                                                                                                                               |      |                                                                              |                 |                                                                                                                                                                                                                     |    |                                                                                                                                                                                                                             |    |                                                                                                                                                                                                                                                                                  |    |                                                                              |                                                                                                                                                                                                                                                                                                                                                                                                                                                                                                                                                                                                                                                                                                                                                                                                                                                                     |    |                                                                                                                                                                                                                                                                                                                                                                                                                                                                                                                                                                                                                                                                                                                                                                     |                                                                                                                                                                                |    |                                                              |                                                                                                                                           |                                                                                                                                                                                                                                                                                                                                            |    |                                                                                                                                                                                                                                                                                 |
|----|----------------|-------------------------------------------------------------------------------------------------------------------------------------------------------------------------------------------------------------------------------|------|------------------------------------------------------------------------------|-----------------|---------------------------------------------------------------------------------------------------------------------------------------------------------------------------------------------------------------------|----|-----------------------------------------------------------------------------------------------------------------------------------------------------------------------------------------------------------------------------|----|----------------------------------------------------------------------------------------------------------------------------------------------------------------------------------------------------------------------------------------------------------------------------------|----|------------------------------------------------------------------------------|---------------------------------------------------------------------------------------------------------------------------------------------------------------------------------------------------------------------------------------------------------------------------------------------------------------------------------------------------------------------------------------------------------------------------------------------------------------------------------------------------------------------------------------------------------------------------------------------------------------------------------------------------------------------------------------------------------------------------------------------------------------------------------------------------------------------------------------------------------------------|----|---------------------------------------------------------------------------------------------------------------------------------------------------------------------------------------------------------------------------------------------------------------------------------------------------------------------------------------------------------------------------------------------------------------------------------------------------------------------------------------------------------------------------------------------------------------------------------------------------------------------------------------------------------------------------------------------------------------------------------------------------------------------|--------------------------------------------------------------------------------------------------------------------------------------------------------------------------------|----|--------------------------------------------------------------|-------------------------------------------------------------------------------------------------------------------------------------------|--------------------------------------------------------------------------------------------------------------------------------------------------------------------------------------------------------------------------------------------------------------------------------------------------------------------------------------------|----|---------------------------------------------------------------------------------------------------------------------------------------------------------------------------------------------------------------------------------------------------------------------------------|
| 1  |                |                                                                                                                                                                                                                               |      |                                                                              |                 |                                                                                                                                                                                                                     |    |                                                                                                                                                                                                                             |    |                                                                                                                                                                                                                                                                                  |    |                                                                              |                                                                                                                                                                                                                                                                                                                                                                                                                                                                                                                                                                                                                                                                                                                                                                                                                                                                     |    |                                                                                                                                                                                                                                                                                                                                                                                                                                                                                                                                                                                                                                                                                                                                                                     |                                                                                                                                                                                |    |                                                              |                                                                                                                                           |                                                                                                                                                                                                                                                                                                                                            |    |                                                                                                                                                                                                                                                                                 |
| 2  |                |                                                                                                                                                                                                                               |      |                                                                              |                 |                                                                                                                                                                                                                     |    |                                                                                                                                                                                                                             |    |                                                                                                                                                                                                                                                                                  |    |                                                                              |                                                                                                                                                                                                                                                                                                                                                                                                                                                                                                                                                                                                                                                                                                                                                                                                                                                                     |    |                                                                                                                                                                                                                                                                                                                                                                                                                                                                                                                                                                                                                                                                                                                                                                     |                                                                                                                                                                                |    |                                                              |                                                                                                                                           |                                                                                                                                                                                                                                                                                                                                            |    |                                                                                                                                                                                                                                                                                 |
| 3  |                |                                                                                                                                                                                                                               |      |                                                                              |                 |                                                                                                                                                                                                                     |    |                                                                                                                                                                                                                             |    |                                                                                                                                                                                                                                                                                  |    |                                                                              |                                                                                                                                                                                                                                                                                                                                                                                                                                                                                                                                                                                                                                                                                                                                                                                                                                                                     |    |                                                                                                                                                                                                                                                                                                                                                                                                                                                                                                                                                                                                                                                                                                                                                                     |                                                                                                                                                                                |    |                                                              |                                                                                                                                           |                                                                                                                                                                                                                                                                                                                                            |    |                                                                                                                                                                                                                                                                                 |
| 4  |                |                                                                                                                                                                                                                               |      |                                                                              |                 |                                                                                                                                                                                                                     |    |                                                                                                                                                                                                                             |    |                                                                                                                                                                                                                                                                                  |    |                                                                              |                                                                                                                                                                                                                                                                                                                                                                                                                                                                                                                                                                                                                                                                                                                                                                                                                                                                     |    |                                                                                                                                                                                                                                                                                                                                                                                                                                                                                                                                                                                                                                                                                                                                                                     |                                                                                                                                                                                |    |                                                              |                                                                                                                                           |                                                                                                                                                                                                                                                                                                                                            |    |                                                                                                                                                                                                                                                                                 |
| 5  |                |                                                                                                                                                                                                                               |      |                                                                              |                 |                                                                                                                                                                                                                     |    |                                                                                                                                                                                                                             |    |                                                                                                                                                                                                                                                                                  |    |                                                                              |                                                                                                                                                                                                                                                                                                                                                                                                                                                                                                                                                                                                                                                                                                                                                                                                                                                                     |    |                                                                                                                                                                                                                                                                                                                                                                                                                                                                                                                                                                                                                                                                                                                                                                     |                                                                                                                                                                                |    |                                                              |                                                                                                                                           |                                                                                                                                                                                                                                                                                                                                            |    |                                                                                                                                                                                                                                                                                 |
| 6  |                |                                                                                                                                                                                                                               |      |                                                                              |                 |                                                                                                                                                                                                                     |    |                                                                                                                                                                                                                             |    |                                                                                                                                                                                                                                                                                  |    |                                                                              |                                                                                                                                                                                                                                                                                                                                                                                                                                                                                                                                                                                                                                                                                                                                                                                                                                                                     |    |                                                                                                                                                                                                                                                                                                                                                                                                                                                                                                                                                                                                                                                                                                                                                                     |                                                                                                                                                                                |    |                                                              |                                                                                                                                           |                                                                                                                                                                                                                                                                                                                                            |    |                                                                                                                                                                                                                                                                                 |
| 7  |                |                                                                                                                                                                                                                               |      |                                                                              |                 |                                                                                                                                                                                                                     |    |                                                                                                                                                                                                                             |    |                                                                                                                                                                                                                                                                                  |    |                                                                              |                                                                                                                                                                                                                                                                                                                                                                                                                                                                                                                                                                                                                                                                                                                                                                                                                                                                     |    |                                                                                                                                                                                                                                                                                                                                                                                                                                                                                                                                                                                                                                                                                                                                                                     |                                                                                                                                                                                |    |                                                              |                                                                                                                                           |                                                                                                                                                                                                                                                                                                                                            |    |                                                                                                                                                                                                                                                                                 |
| 8  | Breakwell L.M. | Understanding the need for spinal registries: Lee Breakwell reviews the importance of registries in spinal research and explains why the British Association of Spinal Surgeons (BASS) has decided to set up its own registry | 2013 | Commentary on why and how the BASS decided set up the British Spine Registry | Spine           | Association of British Healthcare Industries (ABHI) has enabled listing of the majority of the available spinal implants. This enables access to data on usage and helps identify national outcomes                 | NS | To enable assessments of certain procedure types, and their outcome. To create a secure, comprehensive database, to allow individual surgeons and their teams to collect prospective data in a convenient and timely manner | NS | A subcommittee was formed, led by a consultant spinal surgeon, to define the dataset and to create a tender process. Bluespier International was the successful company, and has worked with the BASS registry committee to design and launch the BSR on the Amplitude platform. | NS | A subcommittee led by a consultant Spinal Surgeon defined the dataset        | Demographics, indication, details of the presenting clinical symptoms, resulting operative data, type of spinal implants, PROMs data                                                                                                                                                                                                                                                                                                                                                                                                                                                                                                                                                                                                                                                                                                                                | NS | A web-based solution was developed, ensuring that all users could access the BSR wherever, and whenever they wished                                                                                                                                                                                                                                                                                                                                                                                                                                                                                                                                                                                                                                                 | Currently there are over 200 registered surgeons, and over 3,000 patients enrolled in the registry                                                                             | NS | Use of a patient portal for direct data input is recommended | NS                                                                                                                                        | Disciplined data collection can result in improved patient care through identifying trends and early problems. Registries help the drive towards value based health care - increase quality whilst reducing costs. The societies will be for the first time able to create real-time accurate population data on spinal surgery in the UK. | NS | To address data security - the BSR has been registered with the UK Information Commissioners Office, the Healthcare Quality Improvement Partnership, and the Record of Central Returns. In addition, NHS IT experts reviewed the security policies, and data storage technology |
| 9  |                |                                                                                                                                                                                                                               |      |                                                                              |                 |                                                                                                                                                                                                                     |    |                                                                                                                                                                                                                             |    |                                                                                                                                                                                                                                                                                  |    |                                                                              |                                                                                                                                                                                                                                                                                                                                                                                                                                                                                                                                                                                                                                                                                                                                                                                                                                                                     |    |                                                                                                                                                                                                                                                                                                                                                                                                                                                                                                                                                                                                                                                                                                                                                                     |                                                                                                                                                                                |    |                                                              |                                                                                                                                           |                                                                                                                                                                                                                                                                                                                                            |    |                                                                                                                                                                                                                                                                                 |
| 10 |                |                                                                                                                                                                                                                               |      |                                                                              |                 |                                                                                                                                                                                                                     |    |                                                                                                                                                                                                                             |    |                                                                                                                                                                                                                                                                                  |    |                                                                              |                                                                                                                                                                                                                                                                                                                                                                                                                                                                                                                                                                                                                                                                                                                                                                                                                                                                     |    |                                                                                                                                                                                                                                                                                                                                                                                                                                                                                                                                                                                                                                                                                                                                                                     |                                                                                                                                                                                |    |                                                              |                                                                                                                                           |                                                                                                                                                                                                                                                                                                                                            |    |                                                                                                                                                                                                                                                                                 |
| 11 |                |                                                                                                                                                                                                                               |      |                                                                              |                 |                                                                                                                                                                                                                     |    |                                                                                                                                                                                                                             |    |                                                                                                                                                                                                                                                                                  |    |                                                                              |                                                                                                                                                                                                                                                                                                                                                                                                                                                                                                                                                                                                                                                                                                                                                                                                                                                                     |    |                                                                                                                                                                                                                                                                                                                                                                                                                                                                                                                                                                                                                                                                                                                                                                     |                                                                                                                                                                                |    |                                                              |                                                                                                                                           |                                                                                                                                                                                                                                                                                                                                            |    |                                                                                                                                                                                                                                                                                 |
| 12 |                |                                                                                                                                                                                                                               |      |                                                                              |                 |                                                                                                                                                                                                                     |    |                                                                                                                                                                                                                             |    |                                                                                                                                                                                                                                                                                  |    |                                                                              |                                                                                                                                                                                                                                                                                                                                                                                                                                                                                                                                                                                                                                                                                                                                                                                                                                                                     |    |                                                                                                                                                                                                                                                                                                                                                                                                                                                                                                                                                                                                                                                                                                                                                                     |                                                                                                                                                                                |    |                                                              |                                                                                                                                           |                                                                                                                                                                                                                                                                                                                                            |    |                                                                                                                                                                                                                                                                                 |
| 13 |                |                                                                                                                                                                                                                               |      |                                                                              |                 |                                                                                                                                                                                                                     |    |                                                                                                                                                                                                                             |    |                                                                                                                                                                                                                                                                                  |    |                                                                              |                                                                                                                                                                                                                                                                                                                                                                                                                                                                                                                                                                                                                                                                                                                                                                                                                                                                     |    |                                                                                                                                                                                                                                                                                                                                                                                                                                                                                                                                                                                                                                                                                                                                                                     |                                                                                                                                                                                |    |                                                              |                                                                                                                                           |                                                                                                                                                                                                                                                                                                                                            |    |                                                                                                                                                                                                                                                                                 |
| 14 |                |                                                                                                                                                                                                                               |      |                                                                              |                 |                                                                                                                                                                                                                     |    |                                                                                                                                                                                                                             |    |                                                                                                                                                                                                                                                                                  |    |                                                                              |                                                                                                                                                                                                                                                                                                                                                                                                                                                                                                                                                                                                                                                                                                                                                                                                                                                                     |    |                                                                                                                                                                                                                                                                                                                                                                                                                                                                                                                                                                                                                                                                                                                                                                     |                                                                                                                                                                                |    |                                                              |                                                                                                                                           |                                                                                                                                                                                                                                                                                                                                            |    |                                                                                                                                                                                                                                                                                 |
| 15 |                |                                                                                                                                                                                                                               |      |                                                                              |                 |                                                                                                                                                                                                                     |    |                                                                                                                                                                                                                             |    |                                                                                                                                                                                                                                                                                  |    |                                                                              |                                                                                                                                                                                                                                                                                                                                                                                                                                                                                                                                                                                                                                                                                                                                                                                                                                                                     |    |                                                                                                                                                                                                                                                                                                                                                                                                                                                                                                                                                                                                                                                                                                                                                                     |                                                                                                                                                                                |    |                                                              |                                                                                                                                           |                                                                                                                                                                                                                                                                                                                                            |    |                                                                                                                                                                                                                                                                                 |
| 16 |                |                                                                                                                                                                                                                               |      |                                                                              |                 |                                                                                                                                                                                                                     |    |                                                                                                                                                                                                                             |    |                                                                                                                                                                                                                                                                                  |    |                                                                              |                                                                                                                                                                                                                                                                                                                                                                                                                                                                                                                                                                                                                                                                                                                                                                                                                                                                     |    |                                                                                                                                                                                                                                                                                                                                                                                                                                                                                                                                                                                                                                                                                                                                                                     |                                                                                                                                                                                |    |                                                              |                                                                                                                                           |                                                                                                                                                                                                                                                                                                                                            |    |                                                                                                                                                                                                                                                                                 |
| 17 |                |                                                                                                                                                                                                                               |      |                                                                              |                 |                                                                                                                                                                                                                     |    |                                                                                                                                                                                                                             |    |                                                                                                                                                                                                                                                                                  |    |                                                                              |                                                                                                                                                                                                                                                                                                                                                                                                                                                                                                                                                                                                                                                                                                                                                                                                                                                                     |    |                                                                                                                                                                                                                                                                                                                                                                                                                                                                                                                                                                                                                                                                                                                                                                     |                                                                                                                                                                                |    |                                                              |                                                                                                                                           |                                                                                                                                                                                                                                                                                                                                            |    |                                                                                                                                                                                                                                                                                 |
| 18 |                |                                                                                                                                                                                                                               |      |                                                                              |                 |                                                                                                                                                                                                                     |    |                                                                                                                                                                                                                             |    |                                                                                                                                                                                                                                                                                  |    |                                                                              |                                                                                                                                                                                                                                                                                                                                                                                                                                                                                                                                                                                                                                                                                                                                                                                                                                                                     |    |                                                                                                                                                                                                                                                                                                                                                                                                                                                                                                                                                                                                                                                                                                                                                                     |                                                                                                                                                                                |    |                                                              |                                                                                                                                           |                                                                                                                                                                                                                                                                                                                                            |    |                                                                                                                                                                                                                                                                                 |
| 19 |                |                                                                                                                                                                                                                               |      |                                                                              |                 |                                                                                                                                                                                                                     |    |                                                                                                                                                                                                                             |    |                                                                                                                                                                                                                                                                                  |    |                                                                              |                                                                                                                                                                                                                                                                                                                                                                                                                                                                                                                                                                                                                                                                                                                                                                                                                                                                     |    |                                                                                                                                                                                                                                                                                                                                                                                                                                                                                                                                                                                                                                                                                                                                                                     |                                                                                                                                                                                |    |                                                              |                                                                                                                                           |                                                                                                                                                                                                                                                                                                                                            |    |                                                                                                                                                                                                                                                                                 |
| 20 | Hickey G.L.    | A technical review of the United Kingdom National Adult Cardiac Surgery Governance Analysis 2008-11                                                                                                                           | 2014 | United Kingdom National Adult Cardiac Surgery Governance Analysis 2008-11    | Cardiac surgery | Society for Cardiothoracic Surgery in Great Britain and Ireland who contribute data to the SCTS database. National Institute for Cardiovascular Outcomes Research, UCL London. National Adult Cardiac Surgery Audit | NS | To give a technical review of the registry                                                                                                                                                                                  | NS | HQUIP                                                                                                                                                                                                                                                                            | NS | Each record contains a hospital identifier code and a consultant GMC number. | Data entered locally by surgeons are validated by database managers prior to upload via a web-portal to NICOR. At this stage, further validation is performed according to logical rules. The data are then forwarded to an academic healthcare informatics department for data cleaning. Cleaning involves removing duplicate records, recoding transcriptional discrepancies and resolving clinical and temporal conflicts. The data cleaning is performed by the analyst responsible for the governance analysis in collaboration with surgeons and the audit manager. All cleaning is made reproducible by programming a series of scripts, which are updated following each new data extract. At this stage, and prior to analysis, data for the last 3 years are returned to each contributing hospital for local update then records in the central registry | NS | Most missing data are resolved during the validation stages of the data transfer. SCTS has a policy for the handling of missing data. First, missing and conflicting data for in-hospital mortality status are backfilled and validated via record linkage to the Office for National Statistics (ONS) census database, which records details of all deaths in England and Wales. After all reasonable attempts to backfill these data, any remaining missing discharge status data are mapped to in-hospital death. For the final analysis dataset after backfilling discharge status data, in Scotland there were 0 (0.00% of Scottish records) missing discharge statuses; in Wales and Northern Ireland, there were 3 missing discharge statuses each (0.06 and | Data is reported on both the base hospital and the responsible consultant surgeon. Risk-adjusted in-hospital mortality, length of stay, postoperative complications, morbidity | NS | NS                                                           | Improve overall service quality, and enable pts to make a choice between providers. Increase public trust, identify underperforming units | NS                                                                                                                                                                                                                                                                                                                                         | NS |                                                                                                                                                                                                                                                                                 |
| 21 | Cosgriff R.    |                                                                                                                                                                                                                               |      |                                                                              |                 |                                                                                                                                                                                                                     |    |                                                                                                                                                                                                                             |    |                                                                                                                                                                                                                                                                                  |    |                                                                              |                                                                                                                                                                                                                                                                                                                                                                                                                                                                                                                                                                                                                                                                                                                                                                                                                                                                     |    |                                                                                                                                                                                                                                                                                                                                                                                                                                                                                                                                                                                                                                                                                                                                                                     |                                                                                                                                                                                |    |                                                              |                                                                                                                                           |                                                                                                                                                                                                                                                                                                                                            |    |                                                                                                                                                                                                                                                                                 |
| 22 | Grant S.W.     |                                                                                                                                                                                                                               |      |                                                                              |                 |                                                                                                                                                                                                                     |    |                                                                                                                                                                                                                             |    |                                                                                                                                                                                                                                                                                  |    |                                                                              |                                                                                                                                                                                                                                                                                                                                                                                                                                                                                                                                                                                                                                                                                                                                                                                                                                                                     |    |                                                                                                                                                                                                                                                                                                                                                                                                                                                                                                                                                                                                                                                                                                                                                                     |                                                                                                                                                                                |    |                                                              |                                                                                                                                           |                                                                                                                                                                                                                                                                                                                                            |    |                                                                                                                                                                                                                                                                                 |
| 23 | Cooper G.      |                                                                                                                                                                                                                               |      |                                                                              |                 |                                                                                                                                                                                                                     |    |                                                                                                                                                                                                                             |    |                                                                                                                                                                                                                                                                                  |    |                                                                              |                                                                                                                                                                                                                                                                                                                                                                                                                                                                                                                                                                                                                                                                                                                                                                                                                                                                     |    |                                                                                                                                                                                                                                                                                                                                                                                                                                                                                                                                                                                                                                                                                                                                                                     |                                                                                                                                                                                |    |                                                              |                                                                                                                                           |                                                                                                                                                                                                                                                                                                                                            |    |                                                                                                                                                                                                                                                                                 |
| 24 | Deanfield J.   |                                                                                                                                                                                                                               |      |                                                                              |                 |                                                                                                                                                                                                                     |    |                                                                                                                                                                                                                             |    |                                                                                                                                                                                                                                                                                  |    |                                                                              |                                                                                                                                                                                                                                                                                                                                                                                                                                                                                                                                                                                                                                                                                                                                                                                                                                                                     |    |                                                                                                                                                                                                                                                                                                                                                                                                                                                                                                                                                                                                                                                                                                                                                                     |                                                                                                                                                                                |    |                                                              |                                                                                                                                           |                                                                                                                                                                                                                                                                                                                                            |    |                                                                                                                                                                                                                                                                                 |
| 25 | Roxburgh J.    |                                                                                                                                                                                                                               |      |                                                                              |                 |                                                                                                                                                                                                                     |    |                                                                                                                                                                                                                             |    |                                                                                                                                                                                                                                                                                  |    |                                                                              |                                                                                                                                                                                                                                                                                                                                                                                                                                                                                                                                                                                                                                                                                                                                                                                                                                                                     |    |                                                                                                                                                                                                                                                                                                                                                                                                                                                                                                                                                                                                                                                                                                                                                                     |                                                                                                                                                                                |    |                                                              |                                                                                                                                           |                                                                                                                                                                                                                                                                                                                                            |    |                                                                                                                                                                                                                                                                                 |
| 26 | Bridgewater B. |                                                                                                                                                                                                                               |      |                                                                              |                 |                                                                                                                                                                                                                     |    |                                                                                                                                                                                                                             |    |                                                                                                                                                                                                                                                                                  |    |                                                                              |                                                                                                                                                                                                                                                                                                                                                                                                                                                                                                                                                                                                                                                                                                                                                                                                                                                                     |    |                                                                                                                                                                                                                                                                                                                                                                                                                                                                                                                                                                                                                                                                                                                                                                     |                                                                                                                                                                                |    |                                                              |                                                                                                                                           |                                                                                                                                                                                                                                                                                                                                            |    |                                                                                                                                                                                                                                                                                 |
| 27 |                |                                                                                                                                                                                                                               |      |                                                                              |                 |                                                                                                                                                                                                                     |    |                                                                                                                                                                                                                             |    |                                                                                                                                                                                                                                                                                  |    |                                                                              |                                                                                                                                                                                                                                                                                                                                                                                                                                                                                                                                                                                                                                                                                                                                                                                                                                                                     |    |                                                                                                                                                                                                                                                                                                                                                                                                                                                                                                                                                                                                                                                                                                                                                                     |                                                                                                                                                                                |    |                                                              |                                                                                                                                           |                                                                                                                                                                                                                                                                                                                                            |    |                                                                                                                                                                                                                                                                                 |
| 28 |                |                                                                                                                                                                                                                               |      |                                                                              |                 |                                                                                                                                                                                                                     |    |                                                                                                                                                                                                                             |    |                                                                                                                                                                                                                                                                                  |    |                                                                              |                                                                                                                                                                                                                                                                                                                                                                                                                                                                                                                                                                                                                                                                                                                                                                                                                                                                     |    |                                                                                                                                                                                                                                                                                                                                                                                                                                                                                                                                                                                                                                                                                                                                                                     |                                                                                                                                                                                |    |                                                              |                                                                                                                                           |                                                                                                                                                                                                                                                                                                                                            |    |                                                                                                                                                                                                                                                                                 |
| 29 |                |                                                                                                                                                                                                                               |      |                                                                              |                 |                                                                                                                                                                                                                     |    |                                                                                                                                                                                                                             |    |                                                                                                                                                                                                                                                                                  |    |                                                                              |                                                                                                                                                                                                                                                                                                                                                                                                                                                                                                                                                                                                                                                                                                                                                                                                                                                                     |    |                                                                                                                                                                                                                                                                                                                                                                                                                                                                                                                                                                                                                                                                                                                                                                     |                                                                                                                                                                                |    |                                                              |                                                                                                                                           |                                                                                                                                                                                                                                                                                                                                            |    |                                                                                                                                                                                                                                                                                 |
| 30 |                |                                                                                                                                                                                                                               |      |                                                                              |                 |                                                                                                                                                                                                                     |    |                                                                                                                                                                                                                             |    |                                                                                                                                                                                                                                                                                  |    |                                                                              |                                                                                                                                                                                                                                                                                                                                                                                                                                                                                                                                                                                                                                                                                                                                                                                                                                                                     |    |                                                                                                                                                                                                                                                                                                                                                                                                                                                                                                                                                                                                                                                                                                                                                                     |                                                                                                                                                                                |    |                                                              |                                                                                                                                           |                                                                                                                                                                                                                                                                                                                                            |    |                                                                                                                                                                                                                                                                                 |
| 31 |                |                                                                                                                                                                                                                               |      |                                                                              |                 |                                                                                                                                                                                                                     |    |                                                                                                                                                                                                                             |    |                                                                                                                                                                                                                                                                                  |    |                                                                              |                                                                                                                                                                                                                                                                                                                                                                                                                                                                                                                                                                                                                                                                                                                                                                                                                                                                     |    |                                                                                                                                                                                                                                                                                                                                                                                                                                                                                                                                                                                                                                                                                                                                                                     |                                                                                                                                                                                |    |                                                              |                                                                                                                                           |                                                                                                                                                                                                                                                                                                                                            |    |                                                                                                                                                                                                                                                                                 |
| 32 |                |                                                                                                                                                                                                                               |      |                                                                              |                 |                                                                                                                                                                                                                     |    |                                                                                                                                                                                                                             |    |                                                                                                                                                                                                                                                                                  |    |                                                                              |                                                                                                                                                                                                                                                                                                                                                                                                                                                                                                                                                                                                                                                                                                                                                                                                                                                                     |    |                                                                                                                                                                                                                                                                                                                                                                                                                                                                                                                                                                                                                                                                                                                                                                     |                                                                                                                                                                                |    |                                                              |                                                                                                                                           |                                                                                                                                                                                                                                                                                                                                            |    |                                                                                                                                                                                                                                                                                 |
| 33 |                |                                                                                                                                                                                                                               |      |                                                                              |                 |                                                                                                                                                                                                                     |    |                                                                                                                                                                                                                             |    |                                                                                                                                                                                                                                                                                  |    |                                                                              |                                                                                                                                                                                                                                                                                                                                                                                                                                                                                                                                                                                                                                                                                                                                                                                                                                                                     |    |                                                                                                                                                                                                                                                                                                                                                                                                                                                                                                                                                                                                                                                                                                                                                                     |                                                                                                                                                                                |    |                                                              |                                                                                                                                           |                                                                                                                                                                                                                                                                                                                                            |    |                                                                                                                                                                                                                                                                                 |
| 34 |                |                                                                                                                                                                                                                               |      |                                                                              |                 |                                                                                                                                                                                                                     |    |                                                                                                                                                                                                                             |    |                                                                                                                                                                                                                                                                                  |    |                                                                              |                                                                                                                                                                                                                                                                                                                                                                                                                                                                                                                                                                                                                                                                                                                                                                                                                                                                     |    |                                                                                                                                                                                                                                                                                                                                                                                                                                                                                                                                                                                                                                                                                                                                                                     |                                                                                                                                                                                |    |                                                              |                                                                                                                                           |                                                                                                                                                                                                                                                                                                                                            |    |                                                                                                                                                                                                                                                                                 |
| 35 |                |                                                                                                                                                                                                                               |      |                                                                              |                 |                                                                                                                                                                                                                     |    |                                                                                                                                                                                                                             |    |                                                                                                                                                                                                                                                                                  |    |                                                                              |                                                                                                                                                                                                                                                                                                                                                                                                                                                                                                                                                                                                                                                                                                                                                                                                                                                                     |    |                                                                                                                                                                                                                                                                                                                                                                                                                                                                                                                                                                                                                                                                                                                                                                     |                                                                                                                                                                                |    |                                                              |                                                                                                                                           |                                                                                                                                                                                                                                                                                                                                            |    |                                                                                                                                                                                                                                                                                 |
| 36 |                |                                                                                                                                                                                                                               |      |                                                                              |                 |                                                                                                                                                                                                                     |    |                                                                                                                                                                                                                             |    |                                                                                                                                                                                                                                                                                  |    |                                                                              |                                                                                                                                                                                                                                                                                                                                                                                                                                                                                                                                                                                                                                                                                                                                                                                                                                                                     |    |                                                                                                                                                                                                                                                                                                                                                                                                                                                                                                                                                                                                                                                                                                                                                                     |                                                                                                                                                                                |    |                                                              |                                                                                                                                           |                                                                                                                                                                                                                                                                                                                                            |    |                                                                                                                                                                                                                                                                                 |
| 37 |                |                                                                                                                                                                                                                               |      |                                                                              |                 |                                                                                                                                                                                                                     |    |                                                                                                                                                                                                                             |    |                                                                                                                                                                                                                                                                                  |    |                                                                              |                                                                                                                                                                                                                                                                                                                                                                                                                                                                                                                                                                                                                                                                                                                                                                                                                                                                     |    |                                                                                                                                                                                                                                                                                                                                                                                                                                                                                                                                                                                                                                                                                                                                                                     |                                                                                                                                                                                |    |                                                              |                                                                                                                                           |                                                                                                                                                                                                                                                                                                                                            |    |                                                                                                                                                                                                                                                                                 |
| 38 |                |                                                                                                                                                                                                                               |      |                                                                              |                 |                                                                                                                                                                                                                     |    |                                                                                                                                                                                                                             |    |                                                                                                                                                                                                                                                                                  |    |                                                                              |                                                                                                                                                                                                                                                                                                                                                                                                                                                                                                                                                                                                                                                                                                                                                                                                                                                                     |    |                                                                                                                                                                                                                                                                                                                                                                                                                                                                                                                                                                                                                                                                                                                                                                     |                                                                                                                                                                                |    |                                                              |                                                                                                                                           |                                                                                                                                                                                                                                                                                                                                            |    |                                                                                                                                                                                                                                                                                 |
| 39 |                |                                                                                                                                                                                                                               |      |                                                                              |                 |                                                                                                                                                                                                                     |    |                                                                                                                                                                                                                             |    |                                                                                                                                                                                                                                                                                  |    |                                                                              |                                                                                                                                                                                                                                                                                                                                                                                                                                                                                                                                                                                                                                                                                                                                                                                                                                                                     |    |                                                                                                                                                                                                                                                                                                                                                                                                                                                                                                                                                                                                                                                                                                                                                                     |                                                                                                                                                                                |    |                                                              |                                                                                                                                           |                                                                                                                                                                                                                                                                                                                                            |    |                                                                                                                                                                                                                                                                                 |
| 40 |                |                                                                                                                                                                                                                               |      |                                                                              |                 |                                                                                                                                                                                                                     |    |                                                                                                                                                                                                                             |    |                                                                                                                                                                                                                                                                                  |    |                                                                              |                                                                                                                                                                                                                                                                                                                                                                                                                                                                                                                                                                                                                                                                                                                                                                                                                                                                     |    |                                                                                                                                                                                                                                                                                                                                                                                                                                                                                                                                                                                                                                                                                                                                                                     |                                                                                                                                                                                |    |                                                              |                                                                                                                                           |                                                                                                                                                                                                                                                                                                                                            |    |                                                                                                                                                                                                                                                                                 |
| 41 |                |                                                                                                                                                                                                                               |      |                                                                              |                 |                                                                                                                                                                                                                     |    |                                                                                                                                                                                                                             |    |                                                                                                                                                                                                                                                                                  |    |                                                                              |                                                                                                                                                                                                                                                                                                                                                                                                                                                                                                                                                                                                                                                                                                                                                                                                                                                                     |    |                                                                                                                                                                                                                                                                                                                                                                                                                                                                                                                                                                                                                                                                                                                                                                     |                                                                                                                                                                                |    |                                                              |                                                                                                                                           |                                                                                                                                                                                                                                                                                                                                            |    |                                                                                                                                                                                                                                                                                 |
| 42 |                |                                                                                                                                                                                                                               |      |                                                                              |                 |                                                                                                                                                                                                                     |    |                                                                                                                                                                                                                             |    |                                                                                                                                                                                                                                                                                  |    |                                                                              |                                                                                                                                                                                                                                                                                                                                                                                                                                                                                                                                                                                                                                                                                                                                                                                                                                                                     |    |                                                                                                                                                                                                                                                                                                                                                                                                                                                                                                                                                                                                                                                                                                                                                                     |                                                                                                                                                                                |    |                                                              |                                                                                                                                           |                                                                                                                                                                                                                                                                                                                                            |    |                                                                                                                                                                                                                                                                                 |
| 43 |                |                                                                                                                                                                                                                               |      |                                                                              |                 |                                                                                                                                                                                                                     |    |                                                                                                                                                                                                                             |    |                                                                                                                                                                                                                                                                                  |    |                                                                              |                                                                                                                                                                                                                                                                                                                                                                                                                                                                                                                                                                                                                                                                                                                                                                                                                                                                     |    |                                                                                                                                                                                                                                                                                                                                                                                                                                                                                                                                                                                                                                                                                                                                                                     |                                                                                                                                                                                |    |                                                              |                                                                                                                                           |                                                                                                                                                                                                                                                                                                                                            |    |                                                                                                                                                                                                                                                                                 |
| 44 |                |                                                                                                                                                                                                                               |      |                                                                              |                 |                                                                                                                                                                                                                     |    |                                                                                                                                                                                                                             |    |                                                                                                                                                                                                                                                                                  |    |                                                                              |                                                                                                                                                                                                                                                                                                                                                                                                                                                                                                                                                                                                                                                                                                                                                                                                                                                                     |    |                                                                                                                                                                                                                                                                                                                                                                                                                                                                                                                                                                                                                                                                                                                                                                     |                                                                                                                                                                                |    |                                                              |                                                                                                                                           |                                                                                                                                                                                                                                                                                                                                            |    |                                                                                                                                                                                                                                                                                 |
| 45 |                |                                                                                                                                                                                                                               |      |                                                                              |                 |                                                                                                                                                                                                                     |    |                                                                                                                                                                                                                             |    |                                                                                                                                                                                                                                                                                  |    |                                                                              |                                                                                                                                                                                                                                                                                                                                                                                                                                                                                                                                                                                                                                                                                                                                                                                                                                                                     |    |                                                                                                                                                                                                                                                                                                                                                                                                                                                                                                                                                                                                                                                                                                                                                                     |                                                                                                                                                                                |    |                                                              |                                                                                                                                           |                                                                                                                                                                                                                                                                                                                                            |    |                                                                                                                                                                                                                                                                                 |
| 46 |                |                                                                                                                                                                                                                               |      |                                                                              |                 |                                                                                                                                                                                                                     |    |                                                                                                                                                                                                                             |    |                                                                                                                                                                                                                                                                                  |    |                                                                              |                                                                                                                                                                                                                                                                                                                                                                                                                                                                                                                                                                                                                                                                                                                                                                                                                                                                     |    |                                                                                                                                                                                                                                                                                                                                                                                                                                                                                                                                                                                                                                                                                                                                                                     |                                                                                                                                                                                |    |                                                              |                                                                                                                                           |                                                                                                                                                                                                                                                                                                                                            |    |                                                                                                                                                                                                                                                                                 |
| 47 |                |                                                                                                                                                                                                                               |      |                                                                              |                 |                                                                                                                                                                                                                     |    |                                                                                                                                                                                                                             |    |                                                                                                                                                                                                                                                                                  |    |                                                                              |                                                                                                                                                                                                                                                                                                                                                                                                                                                                                                                                                                                                                                                                                                                                                                                                                                                                     |    |                                                                                                                                                                                                                                                                                                                                                                                                                                                                                                                                                                                                                                                                                                                                                                     |                                                                                                                                                                                |    |                                                              |                                                                                                                                           |                                                                                                                                                                                                                                                                                                                                            |    |                                                                                                                                                                                                                                                                                 |

1  
2  
3  
4  
5  
6  
7  
8  
9  
10  
11  
12  
13  
14  
15  
16  
17  
18  
19  
20  
21  
22  
23  
24  
25  
26  
27  
28  
29  
30  
31  
32  
33  
34  
35  
36  
37  
38  
39  
40  
41  
42  
43  
44  
45  
46  
47

|                                           |                                                                                                              |      |                          |                          |                                            |    |                                                                                                                                                                                                                |                                                  |                                                                                                                                                                                                                   |                                                                                                                                                                                                                                                                                                                                                                                                                                                                                                                                                                                                                                                                                                                                                                                                             |                                                                                                                                                                                                                                                                                                                                                     |                                                                                                                                                                                                                                                                                                                                                                                                                                                               |                                                                                                                                                                  |                                                                                                                                                                                                                                                                                                                                                                                                                    |                                                                               |                                                                                                                                                                                                                                                                                                                                                                                                                                                                                                                                        |                                                                                                                                                                                         |                                                                                                                                                                                                                                                                                                                                                                                                               |                                                                                                                                                                       |    |    |
|-------------------------------------------|--------------------------------------------------------------------------------------------------------------|------|--------------------------|--------------------------|--------------------------------------------|----|----------------------------------------------------------------------------------------------------------------------------------------------------------------------------------------------------------------|--------------------------------------------------|-------------------------------------------------------------------------------------------------------------------------------------------------------------------------------------------------------------------|-------------------------------------------------------------------------------------------------------------------------------------------------------------------------------------------------------------------------------------------------------------------------------------------------------------------------------------------------------------------------------------------------------------------------------------------------------------------------------------------------------------------------------------------------------------------------------------------------------------------------------------------------------------------------------------------------------------------------------------------------------------------------------------------------------------|-----------------------------------------------------------------------------------------------------------------------------------------------------------------------------------------------------------------------------------------------------------------------------------------------------------------------------------------------------|---------------------------------------------------------------------------------------------------------------------------------------------------------------------------------------------------------------------------------------------------------------------------------------------------------------------------------------------------------------------------------------------------------------------------------------------------------------|------------------------------------------------------------------------------------------------------------------------------------------------------------------|--------------------------------------------------------------------------------------------------------------------------------------------------------------------------------------------------------------------------------------------------------------------------------------------------------------------------------------------------------------------------------------------------------------------|-------------------------------------------------------------------------------|----------------------------------------------------------------------------------------------------------------------------------------------------------------------------------------------------------------------------------------------------------------------------------------------------------------------------------------------------------------------------------------------------------------------------------------------------------------------------------------------------------------------------------------|-----------------------------------------------------------------------------------------------------------------------------------------------------------------------------------------|---------------------------------------------------------------------------------------------------------------------------------------------------------------------------------------------------------------------------------------------------------------------------------------------------------------------------------------------------------------------------------------------------------------|-----------------------------------------------------------------------------------------------------------------------------------------------------------------------|----|----|
| Mangera A.<br>Pays B.                     | BAUS Section of Endourology national Ureterscopy audit: Setting the standards for revalidation               | 2013 | Audit of UK Ureterscopy  | Ureterscopy              | British Association of Urological Surgeons | NS | NS                                                                                                                                                                                                             | Aim is for this audit to develop into a registry | NS                                                                                                                                                                                                                | Nil funding                                                                                                                                                                                                                                                                                                                                                                                                                                                                                                                                                                                                                                                                                                                                                                                                 | A consensus proforma was produced by the BAUS Section of Endourology to capture all necessary data. The proforma was created using the percutaneous nephrolithotomy registry as a basis. It was initially approved and piloted by the BAUS Section of Endourology Data and Audit committee. Thereafter it was approved by the BAUS Audit committee. | Patient demographics, procedure side, elective/emergency, grade of surgeon, number and site of stone(s), size of stone, pre-op investigations, whether stent was used pre-operatively, use of prophylactic antibiotics, supervised training operation, procedure (rigid/flexible ureteroscope), difficult access, accessory procedures, percentage of procedures abandoned, total stone clearance rate, complications, length of stay, post operative imaging | NS                                                                                                                                                               | A national prospective audit link was sent to all consultant members of the BAUS Section of Endourology. Members were encouraged to complete the standardised proforma for all URS undertaken during a two week period (23 April 2012-6 May 2012). To develop this audit into a registry. Compulsory Surgeon participation, which may occur with revalidation, may provide the only means of accurate data capture | 143 procedures were recorded. 26% of cases performed in England were recorded | NS                                                                                                                                                                                                                                                                                                                                                                                                                                                                                                                                     | NS                                                                                                                                                                                      | Follow-up period was short, and long-term complications will be missed. There was no precise definition for day-case surgery. Surgeons are already under increased pressure to record and document all surgical activity and a registry will inevitably increase this burden. Time constraints may compromise accurate and timely data recording and lead to apathy in some surgeons, limiting participation. | NS                                                                                                                                                                    | NS | NS |
| Franklin P.D.<br>Harrold L.<br>Ayers D.C. | Incorporating patient-reported outcomes in total joint arthroplasty registries: Challenges and opportunities | 2013 | Total Joint Arthroplasty | Total Joint Arthroplasty | NS                                         | NS | This paper reviews the use of Patient reported outcomes (PROs) by worldwide TJA registries, the challenges of integrating PRO's in national implant registries and lessons from registries that have used PROs | NS                                               | Whether government-funded or supported by specialist bodies, manufacturers, or research agencies, the costs of registry data collection must be justified by the value of the knowledge gained from the analyses. | Omitting patient-reported outcomes precludes surgeons from fully understanding the factors that contribute to pain relief, restoration of function, and patient satisfaction. PROs are increasingly used in the allocation of healthcare resources and comparative effectiveness research. PRO data must be valuable to multiple stakeholders to justify the incremental costs of their collection. Important to choose suitable PROs and develop innovative methods to collect data. To improve long-term data completion, some registries collect PRO's directly from patients at regular intervals after TJA. It is better not to rely on collecting data when patients return to clinic rather it is better to collect data directly from patients (direct-records). There was a lack of consensus over | Implant longevity, revision rates, patient demographics, BMI, co-morbidities, PROs related to pain relief and functional gains                                                                                                                                                                                                                      | NS                                                                                                                                                                                                                                                                                                                                                                                                                                                            | Registry procedures should be simple to increase participation. Returning registry data to the surgeon encourages ongoing commitment to complete data collection | NS                                                                                                                                                                                                                                                                                                                                                                                                                 | NS                                                                            | Direct entering of PRO data by patients via web-based software and mobile phones will help improve follow-up data. To increase patient participation in their own data collection, it is important to engage the patient during the consent process, have a registry coordinator to follow up the patient to encourage participation, make it easy for patients to enter PRO data electronically, and have multiple languages available. Beneficial to consent patients to be enrolled in PRO capture at the time surgery is scheduled | This review found that most data is collected at the time the patient undergoes the procedure, but postoperative follow up data is often lacking - due to different clinician/hospital. | Enable monitoring of postdischarge outcomes and identify patient who may be at risk for implant failure. PRO's also help guide best practices and help regulate implants providing important information to manufacturers. Such data informs surgeons practice and enables self-audit                                                                                                                         | The International Society of Arthroplasty Registries defines a full member registry as one that captures more than 90% of all cases and clinically validates the data | NS |    |

choose - genetic measures or condition specific, pre and post op PROs or only pre/post. It can be time consuming to enter PRO data and can be difficult to engage patients to enter their own PRO data.

|             |                                                                                                                     |      |                                                 |              |    |                                                                                                               |                                                                                                                                                                                                                                                                                                      |                                                                                                                                                                                                                                                                                                                                                                                                                                                                                                                                                                                                                                                                  |                                                                                                                                                     |    |                                                                                                                                                                                                                                                                                                                                                                                                                                             |                                                                                                                                                                       |                                                                                                                                                                                                                                                                                                                                                                                                                                                                                                                                                                                                                                                                      |    |    |    |    |                                                                                                                                                                                                                                                                                                                                                                                                                                                                                              |    |                                                                                                                                                                                                                                                                                                                                                                                                                                                                                                                                                                                                                                                                                                                                                                                                                                                                                                                                                                                                                                                                                                                                                                                                      |
|-------------|---------------------------------------------------------------------------------------------------------------------|------|-------------------------------------------------|--------------|----|---------------------------------------------------------------------------------------------------------------|------------------------------------------------------------------------------------------------------------------------------------------------------------------------------------------------------------------------------------------------------------------------------------------------------|------------------------------------------------------------------------------------------------------------------------------------------------------------------------------------------------------------------------------------------------------------------------------------------------------------------------------------------------------------------------------------------------------------------------------------------------------------------------------------------------------------------------------------------------------------------------------------------------------------------------------------------------------------------|-----------------------------------------------------------------------------------------------------------------------------------------------------|----|---------------------------------------------------------------------------------------------------------------------------------------------------------------------------------------------------------------------------------------------------------------------------------------------------------------------------------------------------------------------------------------------------------------------------------------------|-----------------------------------------------------------------------------------------------------------------------------------------------------------------------|----------------------------------------------------------------------------------------------------------------------------------------------------------------------------------------------------------------------------------------------------------------------------------------------------------------------------------------------------------------------------------------------------------------------------------------------------------------------------------------------------------------------------------------------------------------------------------------------------------------------------------------------------------------------|----|----|----|----|----------------------------------------------------------------------------------------------------------------------------------------------------------------------------------------------------------------------------------------------------------------------------------------------------------------------------------------------------------------------------------------------------------------------------------------------------------------------------------------------|----|------------------------------------------------------------------------------------------------------------------------------------------------------------------------------------------------------------------------------------------------------------------------------------------------------------------------------------------------------------------------------------------------------------------------------------------------------------------------------------------------------------------------------------------------------------------------------------------------------------------------------------------------------------------------------------------------------------------------------------------------------------------------------------------------------------------------------------------------------------------------------------------------------------------------------------------------------------------------------------------------------------------------------------------------------------------------------------------------------------------------------------------------------------------------------------------------------|
| Bulusu V.R. | Rationale and design of a UK database for a rare cancer type: The GEM Registry for gastrointestinal stromal tumours | 2013 | GIST Epidemiology and Management (GEM) Registry | GIST tumours | NS | The registry is regulated by the UK GEM Registry Steering Committee, comprised of recognised experts in GIST. | Aim of paper: To describe the rationale and study design of the GIST Epidemiology and Management (GEM) Registry. Aim of registry: to further characterise patients with GISTs and to provide comprehensive data to improve understanding of the incidence, treatment and outcomes of GISTs in the UK | Web-based system. The GEM database has been designed around a Microsoft Access (MSACCESS) core using a SQL interface from specifically designed Active Server (asp) web pages. There are two main data input pages, for clinical and pathological (extended) data, together with facilities for reviewing historical records for each patient and generating real-time reports on the current database content. Piloting the registry was useful. It allowed GIST clinicians using the registry to test the software and identify any areas for improvement - suggested modifications were agreed by the Steering Committee before implementation on the website | Development of the UK GEM Registry and ongoing training was supported by an unrestricted educational grant from Novartis Pharmaceuticals UK limited | NS | Demographics, date of diagnosis, tumour characteristics, referral source, mode of presentation, biopsy details and date of procedure, rupture (yes/no), risk assessment, tumour type, details of resection, adjuvant treatment, details of metastases, relapse date, participation in clinical trial (yes/no), date and case of death, consent received, loss to follow up recorded. For centres willing an extended data set was available | Periodic on-site quality assurance checks are maintained, together with continuous statistical comparisons of local data between centres to warrant data consistency. | The interface pages provide real-time assistance with data input, by providing reminders for mandatory fields, acceptable ranges for numeric fields, calendar support for dates and drop-down boxes for most text input. Data clerks, nurses and clinicians at each participating centre attended training sessions to ensure data accuracy. Every unit had training on the use of the registry tool. A user guide was available and e-mail and telephone support was provided. Ongoing training and support for newly recruited centres, drop-down boxes, calendars and numeric limits in the web-based software interface can reduce the likelihood of human error | NS | NS | NS | NS | The registry data will provide important insights into the incidence, prevalence, recurrence, survival and mortality rates of GISTs, as well as treatment practices throughout the UK, thereby enabling therapeutic intervention to be evaluated and ultimately optimised. It will also help review prognosis and assess long term treatment benefits and improve quality of care delivery. This information will help inform clinical practice and guide the development of clinical trials | NS | The Registry will be implemented and reported in accordance with applicable local regulations and with the ethical principles laid down in the Declaration of Helsinki. Ethical approval was granted centrally for the registry via the National Research Ethics Service. Eligible patients will only be included in the study after providing written, informed consent. All data will be anonymous. Data stored on either local hospital server or at server maintained by commercial host. Periodically, locally stored information is uploaded to the central UK GIST Registry (National Data set) held on the host server. User access to the system is password protected and has multiple levels of privilege for data editing, record deletion, transmission to the central server & creation of new user accounts. Clinicians are able to access the system from anywhere by logging in via the hospital intranet. The Steering Committee reviews the requests for access to the registry. Each request is carefully reviewed on a case by case basis and appropriate access granted for ethically approved research projects. Access to the system is limited to individuals having access |
|-------------|---------------------------------------------------------------------------------------------------------------------|------|-------------------------------------------------|--------------|----|---------------------------------------------------------------------------------------------------------------|------------------------------------------------------------------------------------------------------------------------------------------------------------------------------------------------------------------------------------------------------------------------------------------------------|------------------------------------------------------------------------------------------------------------------------------------------------------------------------------------------------------------------------------------------------------------------------------------------------------------------------------------------------------------------------------------------------------------------------------------------------------------------------------------------------------------------------------------------------------------------------------------------------------------------------------------------------------------------|-----------------------------------------------------------------------------------------------------------------------------------------------------|----|---------------------------------------------------------------------------------------------------------------------------------------------------------------------------------------------------------------------------------------------------------------------------------------------------------------------------------------------------------------------------------------------------------------------------------------------|-----------------------------------------------------------------------------------------------------------------------------------------------------------------------|----------------------------------------------------------------------------------------------------------------------------------------------------------------------------------------------------------------------------------------------------------------------------------------------------------------------------------------------------------------------------------------------------------------------------------------------------------------------------------------------------------------------------------------------------------------------------------------------------------------------------------------------------------------------|----|----|----|----|----------------------------------------------------------------------------------------------------------------------------------------------------------------------------------------------------------------------------------------------------------------------------------------------------------------------------------------------------------------------------------------------------------------------------------------------------------------------------------------------|----|------------------------------------------------------------------------------------------------------------------------------------------------------------------------------------------------------------------------------------------------------------------------------------------------------------------------------------------------------------------------------------------------------------------------------------------------------------------------------------------------------------------------------------------------------------------------------------------------------------------------------------------------------------------------------------------------------------------------------------------------------------------------------------------------------------------------------------------------------------------------------------------------------------------------------------------------------------------------------------------------------------------------------------------------------------------------------------------------------------------------------------------------------------------------------------------------------|

1  
2  
3  
4  
5  
6  
7  
8  
9  
10  
11  
12  
13  
14  
15  
16  
17  
18  
19  
20  
21  
22  
23  
24  
25  
26  
27  
28  
29  
30  
31  
32  
33  
34  
35  
36  
37  
38  
39  
40  
41  
42  
43  
44  
45  
46  
47



checked at an aggregate level against data available from the HESonline website. Our findings demonstrate that for procedures with simple specific codes (i.e. not requiring complex combinations of codes to describe the procedure), HES can accurately identify hospitals using new procedures and the numbers of those procedures undertaken. In contrast, HES data show poor specificity for procedures requiring complex combinations of OPCS coding. HES may help to identify hospitals that have not registered cases on national databases. HES data may be useful to improve the quality of national registers. For example, this has been successfully achieved in the National Bowel Cancer Audit Project by the Association of Coloproctology of Great Britain and Ireland, which used HES to check the coverage of the Audit, and the UK National Joint Register which demonstrated important variations in hip and knee replacement revision rates through linkage of its data to HES

For peer review only

1  
2  
3  
4  
5  
6  
7  
8  
9  
10  
11  
12  
13  
14  
15  
16  
17  
18  
19  
20  
21  
22  
23  
24  
25  
26  
27  
28  
29  
30  
31  
32  
33  
34  
35  
36  
37  
38  
39  
40  
41  
42  
43  
44  
45  
46  
47

1  
2  
3  
4  
5  
6  
7  
8  
9  
10  
11  
12  
13  
14  
15  
16  
17  
18  
19  
20  
21  
22  
23  
24  
25  
26  
27  
28  
29  
30  
31  
32  
33  
34  
35  
36  
37  
38  
39  
40  
41  
42  
43  
44  
45  
46  
47

|          |                                                               |      |                                        |                                                                           |                                                                                                                                                           |                                                                                                                                                               |                                                                                                         |                                                                                                                                                                                                                                                                                                                                      |                                                              |          |                                                                                                                                                                                                                                                                                                                                                                                                 |    |                                                                                                                                                                                                                                                                                                                                                                                                                                                                                                                                                                                                                                                                                                                                                                                                                                                                                                                                                                                                                                                                                                                                                                                                                                                                                                                                                                                                                                                                                                                                                                                                                                                                                                                           |                                                                                                                                                                                                                                                                                                                                                                                                                                                                                                                                                                                                                                                                                    |                                                                                                                                                            |                                                                                                                                                                                                                                                                                                                   |                                                         |                                                                                                                                                                                                      |    |                                                                                                                                                                                                                                                                                                                           |
|----------|---------------------------------------------------------------|------|----------------------------------------|---------------------------------------------------------------------------|-----------------------------------------------------------------------------------------------------------------------------------------------------------|---------------------------------------------------------------------------------------------------------------------------------------------------------------|---------------------------------------------------------------------------------------------------------|--------------------------------------------------------------------------------------------------------------------------------------------------------------------------------------------------------------------------------------------------------------------------------------------------------------------------------------|--------------------------------------------------------------|----------|-------------------------------------------------------------------------------------------------------------------------------------------------------------------------------------------------------------------------------------------------------------------------------------------------------------------------------------------------------------------------------------------------|----|---------------------------------------------------------------------------------------------------------------------------------------------------------------------------------------------------------------------------------------------------------------------------------------------------------------------------------------------------------------------------------------------------------------------------------------------------------------------------------------------------------------------------------------------------------------------------------------------------------------------------------------------------------------------------------------------------------------------------------------------------------------------------------------------------------------------------------------------------------------------------------------------------------------------------------------------------------------------------------------------------------------------------------------------------------------------------------------------------------------------------------------------------------------------------------------------------------------------------------------------------------------------------------------------------------------------------------------------------------------------------------------------------------------------------------------------------------------------------------------------------------------------------------------------------------------------------------------------------------------------------------------------------------------------------------------------------------------------------|------------------------------------------------------------------------------------------------------------------------------------------------------------------------------------------------------------------------------------------------------------------------------------------------------------------------------------------------------------------------------------------------------------------------------------------------------------------------------------------------------------------------------------------------------------------------------------------------------------------------------------------------------------------------------------|------------------------------------------------------------------------------------------------------------------------------------------------------------|-------------------------------------------------------------------------------------------------------------------------------------------------------------------------------------------------------------------------------------------------------------------------------------------------------------------|---------------------------------------------------------|------------------------------------------------------------------------------------------------------------------------------------------------------------------------------------------------------|----|---------------------------------------------------------------------------------------------------------------------------------------------------------------------------------------------------------------------------------------------------------------------------------------------------------------------------|
| Small P. | The UK national bariatric surgery registry: The second report | 2013 | UK National Bariatric Surgery Registry | Bariatric surgery: gastric bypass, gastric banding and sleeve gastrectomy | British Obesity and Metabolic Surgery Society (BOMSS), Association of laparoscopic surgeons, Association of Upper gastrointestinal surgeons and Dendrite. | Registry management by Dendrite clinical systems. Day to day administration by BOMSS. Oversight of the database design controlled by NBSR Database committee. | To provide a nationwide analysis of outcomes from bariatric and metabolic surgery in the UK and Ireland | Bespoke registry built by Dendrite. Hosted on a secure Dendrite server within the NHSNet N3 network. This N3 network has a fast link from any NHS computer that has NHS intranet access. The server also has a network card which gives secure access from outside the NHSNet so that data can be entered from any private hospital. | No Public funding. Anticipates receiving funding from HQUIP. | BMJ Open | Demographics, mortality, how each pt was funded, length of stay, complications, BMI pre-op, ASA, functional status, operating surgeon, type of operation, operative approach, co-morbidities, functional impairment, additional procedures, mortality data at the level of the individual surgeon, weight loss post op, change in co-morbidities post op, discharge date, discharge destination | NS | Missing data is inevitable when collecting large amounts of data, but can be minimised by careful registry design and well engaged participants. It takes less than eight minutes to complete the on-line database record. Volume of missing data is a reflection of the following factors: 1) how accessible/available the information/data is to whoever enters the data 2) how important/useful the clinician believes the data to be 3) the clarity of the data definitions. To aid data collection, the system offers downloadable PDF forms for each section of the database and for each operation type - these forms can go in the patient notes and be filled in during the patient pathway - data can then be inputted into a computer when the patient is discharged. The data collected enables users to keep track of their cases, edit data, and follow up their patients. There has been an exponential growth in the number of data entry since 2006 - reflection on a) enthusiasm of bariatric surgeons b) 'continued yet slow growth' in the provision of services. Submission of data to the NBSR has recently become a condition for NHS commissioning of bariatric surgery so in the future the NBSR should contain data on all NHS funded bariatric surgery patients. This has increased number of contributing surgeons from 84 to 150 and number of contributing hospitals from 89 to 129. Whilst submission of data for privately funded patients is not yet mandatory, it is anticipated that data for most of these patients will be included. Colour coding system highlights records that are incomplete. Other tools have been developed to make it easier to input data: multi-choice tick | 77% of UK Bariatric surgeons were entering data and upto 78% of NHS patients were being recorded into the registry. The degree of completeness for comorbidity data for the NBSR has improved over time. 80% had a complete set of comorbidity data recorded, and just over 10% had only 1 field missing. In the NBSR, it appeared that the comorbidity data entry points that were perceived to be more important were filled in more often than those perceived to be not as useful eg HTN had a high completeness rate, depression and liver disease had a lower completeness rate. 18283 surgical procedures recorded in the database (procedures performed between 2011-2013) | Annual reports. To conform with DOH, surgeons agreed for submitting and reporting of their own mortality data in the interest of openness and transparency | Weight loss surgery Information and Support (WLSinfo) - is a patient led charity. They were invited to contribute the introduction of the report. The charity was very happy to be involved and we reassured by the outcomes RE mortality, morbidity and LOS. They were also reassured about their chosen surgeon | How to improve follow up of patients is a key challenge | Gives insight into trends of practice and overall outcomes. Help give information on clinical and cost effectiveness. Helps compare interventions in terms of outcomes. Helps provide follow up data | NS | Data are anonymised to comply with UK data protection laws. The registry is hosted on a secure Dendrite server. To gain access to data, add, edit data, each user must have their own ID and password. Each user can only see their own data. Access to the database as a whole is restricted to the system administrator |
|----------|---------------------------------------------------------------|------|----------------------------------------|---------------------------------------------------------------------------|-----------------------------------------------------------------------------------------------------------------------------------------------------------|---------------------------------------------------------------------------------------------------------------------------------------------------------------|---------------------------------------------------------------------------------------------------------|--------------------------------------------------------------------------------------------------------------------------------------------------------------------------------------------------------------------------------------------------------------------------------------------------------------------------------------|--------------------------------------------------------------|----------|-------------------------------------------------------------------------------------------------------------------------------------------------------------------------------------------------------------------------------------------------------------------------------------------------------------------------------------------------------------------------------------------------|----|---------------------------------------------------------------------------------------------------------------------------------------------------------------------------------------------------------------------------------------------------------------------------------------------------------------------------------------------------------------------------------------------------------------------------------------------------------------------------------------------------------------------------------------------------------------------------------------------------------------------------------------------------------------------------------------------------------------------------------------------------------------------------------------------------------------------------------------------------------------------------------------------------------------------------------------------------------------------------------------------------------------------------------------------------------------------------------------------------------------------------------------------------------------------------------------------------------------------------------------------------------------------------------------------------------------------------------------------------------------------------------------------------------------------------------------------------------------------------------------------------------------------------------------------------------------------------------------------------------------------------------------------------------------------------------------------------------------------------|------------------------------------------------------------------------------------------------------------------------------------------------------------------------------------------------------------------------------------------------------------------------------------------------------------------------------------------------------------------------------------------------------------------------------------------------------------------------------------------------------------------------------------------------------------------------------------------------------------------------------------------------------------------------------------|------------------------------------------------------------------------------------------------------------------------------------------------------------|-------------------------------------------------------------------------------------------------------------------------------------------------------------------------------------------------------------------------------------------------------------------------------------------------------------------|---------------------------------------------------------|------------------------------------------------------------------------------------------------------------------------------------------------------------------------------------------------------|----|---------------------------------------------------------------------------------------------------------------------------------------------------------------------------------------------------------------------------------------------------------------------------------------------------------------------------|

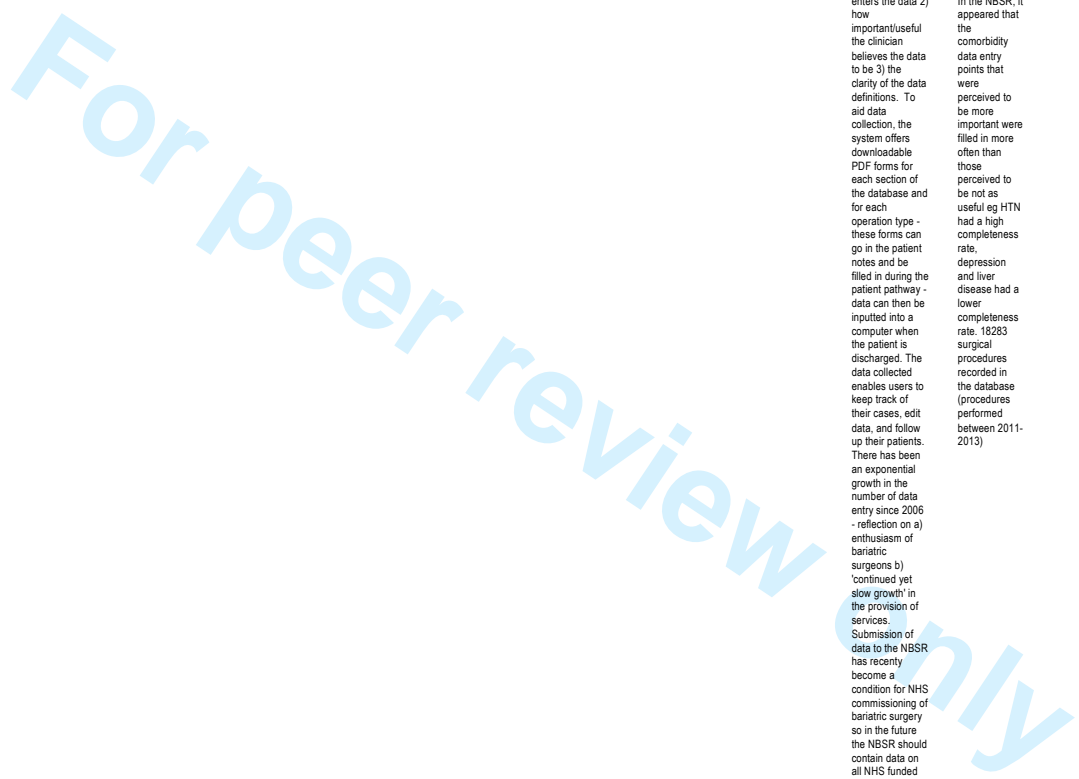

boxes, drop  
down lists,  
limiting free-text  
boxes as much  
as possible,  
hover tip prompts  
to assist users,  
auto-calculations  
(eg for BMI), on  
screen data  
validation  
checks, soft  
mandatory fields  
(so the user is  
warned of  
incomplete key  
fields when  
moving to  
another screen,  
automated  
production of  
operation notes  
and clinic letters,  
auto save  
features, visual  
cues to help  
users know  
which part of the  
database they  
are in (eg gastric  
bypass screen).  
During the follow  
up consultations,  
doctors and  
nurses can enter  
the follow-up  
data in real time  
during the clinic  
visit. The  
software can  
then generate an  
automated  
follow-up letter  
which will  
include  
procedure  
details, weight  
loss over time (as  
a graph),  
comorbidity  
status and  
progress

For peer review only

1  
2  
3  
4  
5  
6  
7  
8  
9  
10  
11  
12  
13  
14  
15  
16  
17  
18  
19  
20  
21  
22  
23  
24  
25  
26  
27  
28  
29  
30  
31  
32  
33  
34  
35  
36  
37  
38  
39  
40  
41  
42  
43  
44  
45  
46  
47



1  
2  
3  
4  
5  
6  
7  
8  
9  
10  
11  
12  
13  
14  
15  
16  
17  
18  
19  
20  
21  
22  
23  
24  
25  
26  
27  
28  
29  
30  
31  
32  
33  
34  
35  
36  
37  
38  
39  
40  
41  
42  
43  
44  
45  
46  
47

|            |                                                                                                                                                                              |      |                  |                                                 |                                                                                                                                                                                                                                                                                                                                                                                                                                                                                                                                                            |                                                                                                                                                                                                                                                                                                                                                                                                                                                                                                                                                                                                                                                                                                                                                             |                                                                                                                                                                                                                                                                                                                                                                                                                                                                                                                                                                                                                                                                                                                     |    |                                                                                                                                                                                                                                             |                                                                                                                                                                                                                                                                                  |                                                                                                                                                                                                                                                                                                    |                                                                                                                                                                                                                                                                                                                                                                                                                                                                                                                                                                                                                                                                                                                                                                                                                                                                                                                                |                                                                                                                                                                                                                                                                                                                                                                                                                                                                                                                                                                                                                                                                                                                                                                                                                                                                                                                                                                                                                                                                                                                                                                                                                                                                                                                                                 |                                                                                                                                                                                                                                                                                                                                                                                                                                                                                                                                                                                                                                                                               |    |                                                                                                                                     |                                                                                                                                                                                                                                                                                                                                                                                                                                                                                                                                                                                                                                                                                                                                                                                                                                    |                                                                                                                                       |    |                                                                                                                                                                                                                                                                                                                                                                                                                                   |
|------------|------------------------------------------------------------------------------------------------------------------------------------------------------------------------------|------|------------------|-------------------------------------------------|------------------------------------------------------------------------------------------------------------------------------------------------------------------------------------------------------------------------------------------------------------------------------------------------------------------------------------------------------------------------------------------------------------------------------------------------------------------------------------------------------------------------------------------------------------|-------------------------------------------------------------------------------------------------------------------------------------------------------------------------------------------------------------------------------------------------------------------------------------------------------------------------------------------------------------------------------------------------------------------------------------------------------------------------------------------------------------------------------------------------------------------------------------------------------------------------------------------------------------------------------------------------------------------------------------------------------------|---------------------------------------------------------------------------------------------------------------------------------------------------------------------------------------------------------------------------------------------------------------------------------------------------------------------------------------------------------------------------------------------------------------------------------------------------------------------------------------------------------------------------------------------------------------------------------------------------------------------------------------------------------------------------------------------------------------------|----|---------------------------------------------------------------------------------------------------------------------------------------------------------------------------------------------------------------------------------------------|----------------------------------------------------------------------------------------------------------------------------------------------------------------------------------------------------------------------------------------------------------------------------------|----------------------------------------------------------------------------------------------------------------------------------------------------------------------------------------------------------------------------------------------------------------------------------------------------|--------------------------------------------------------------------------------------------------------------------------------------------------------------------------------------------------------------------------------------------------------------------------------------------------------------------------------------------------------------------------------------------------------------------------------------------------------------------------------------------------------------------------------------------------------------------------------------------------------------------------------------------------------------------------------------------------------------------------------------------------------------------------------------------------------------------------------------------------------------------------------------------------------------------------------|-------------------------------------------------------------------------------------------------------------------------------------------------------------------------------------------------------------------------------------------------------------------------------------------------------------------------------------------------------------------------------------------------------------------------------------------------------------------------------------------------------------------------------------------------------------------------------------------------------------------------------------------------------------------------------------------------------------------------------------------------------------------------------------------------------------------------------------------------------------------------------------------------------------------------------------------------------------------------------------------------------------------------------------------------------------------------------------------------------------------------------------------------------------------------------------------------------------------------------------------------------------------------------------------------------------------------------------------------|-------------------------------------------------------------------------------------------------------------------------------------------------------------------------------------------------------------------------------------------------------------------------------------------------------------------------------------------------------------------------------------------------------------------------------------------------------------------------------------------------------------------------------------------------------------------------------------------------------------------------------------------------------------------------------|----|-------------------------------------------------------------------------------------------------------------------------------------|------------------------------------------------------------------------------------------------------------------------------------------------------------------------------------------------------------------------------------------------------------------------------------------------------------------------------------------------------------------------------------------------------------------------------------------------------------------------------------------------------------------------------------------------------------------------------------------------------------------------------------------------------------------------------------------------------------------------------------------------------------------------------------------------------------------------------------|---------------------------------------------------------------------------------------------------------------------------------------|----|-----------------------------------------------------------------------------------------------------------------------------------------------------------------------------------------------------------------------------------------------------------------------------------------------------------------------------------------------------------------------------------------------------------------------------------|
| Luchini P. | The UK transcatheter aortic valve implantation (TAVI) registry: one of the suite of registries hosted by the National Institute for Cardiovascular Outcomes Research (NICOR) | 2012 | UK TAVI Registry | Transcatheter Aortic Valve implantation surgery | Collaborative approach between stakeholders, with representation from the professional specialist societies (cardiologists via the British Cardiovascular Intervention Society (BCIS), and cardiac surgeons via the Society of Cardiothoracic Surgeons (SCTS)), those involved in data collection and management (the former Central Cardiac Audit Database (CCAD) group, and representatives from the Department of Health (England), the National Specialist Commissioning Advisory Group, and the National Institute for Health and Clinical Excellence | TAVI Steering group. The UK TAVI Group comprises four subgroups: the Steering Group, the Data Management Group (DMG), the Clinical Research Group and the Dataset Group. The Steering Group provides overarching intellectual and professional leadership, and oversight of the developing UK TAVI programme. The DMG acts as custodians of the data, with responsibility for planning analyses and helping in the development of scientific manuscripts. The DMG also acts as a review panel for initial screening of academic requests for access to the TAVI dataset. The role of the Clinical Research Group is to develop and encourage academic analysis of the TAVI database, with plans to develop risk modelling specific to this new intervention | To help guide the commissioning of procedures. To provide a detailed and accurate description of the way this evolving technology is being used to treat patients, to describe the results of this treatment and to be reassured that it is being undertaken as safely as possible. It is hoped that the registry will ultimately improve the care of patients by guiding the therapy to those who will gain most benefit, and benchmarking TAVI units so that all can learn from the best practice of others. It is hoped that comprehensive clinical and outcome data, such as that collected since the first TAVI procedure was performed, may be used to inform the safe introduction of other new technologies | NS | Initial funding for the UK TAVI steering group was provided by the National Specialist Commissioning s. As a part of the NICOR dataset of a UK RCT and is responsible for delivering new iterations and ensuring the change control process | a balance between the size of the dataset and the willingness and ability of data entry teams to collect it accurately. The Dataset Group devised the original TAVI dataset of a UK RCT and is responsible for delivering new iterations and ensuring the change control process | patient demographics, indications for TAVI, risk factors for intervention, details of the operators, technical aspects of the procedure, and adverse outcomes, including complications up to the time of hospital discharge, there are six additional fields provided for 1- and 3-year follow-up. | TAVI data collection was initially run centrally by the CCAD (Central Cardiac Audit Database) team, along with its other major UK cardiac audits. In 2011, CCAD became part of the newly established National Institute for Cardiovascular Research (NICOR), which, in addition to the TAVI registry, also hosts a number of other national cardiovascular registries. A web browser-based interface has been developed to allow data entry and encrypted transfer to central servers at NICOR. This is available to all centres free of charge. For centres using their own database systems, all that is required is for these systems to generate a comma-separated-values file of a specified format. This can then be sent securely via the web browser interface to the NICOR servers. The National Health Service (NHS) number provides a unique identifier for any person registered with the NHS in England and Wales | Making commissioning of procedures conditional on data collection. Staff at NICOR provide telephone support via a help desk for technical issues and, together with the TAVI Steering Group members, respond to queries regarding case scenarios and definitions. A secure drop box can be used to analyse potential technical problems related to data uploads, file structures and field mapping errors. The commissioning framework in 2009 includes the following statement: 'Mandatory collection of key data will be required from all UK centres in which the procedure is undertaken, in the form of a registry. The registry will include all new patients undergoing the procedure, as well as those who have already received it. Continued funding of TAVI centres will be dependent on compliance with data collection and submission.' Thus, strong professional and commissioning pressure was applied to encourage data collection. In addition, some of the initial funding from the commissioners for the TAVI group was ring-fenced to provide support staff at NICOR whose main remit was to liaise with all TAVI centres and their data entry personnel to assist with timely and accurate data entry. A data completeness report is sent regularly to all centres so that areas for improvement can be readily identified | To date, very high levels of completeness have been achieved, with only one hospital failing to participate fully. For data relating to procedures undertaken before the end of 2010, completeness of valid data was 99.6% for demographic data, 96.4% for risk factors, 97.4% for procedural variables and 98.5% for in-hospital outcomes. Mortality tracking was achieved in 100%. There is no external data validation, however, range checks are applied to appropriate fields. Missing and extreme values and data inconsistencies are queried by direct contact with the TAVI centre. Reliance is placed on local data entry and clinical staff to ensure data accuracy | NS | Initial publication efforts focused on the analysis of all data from the start of TAVI in the UK (2007) to the end of December 2009 | Making changes to the dataset risks losing collection from some units whose ability to modify data collection software is limited. Other than mortality tracking, the accuracy and completeness of the data are dependent on the individual centre's efforts, and other than range checks and checks for internal validity, there are no external validation processes in place. While we believe that centres make great efforts to submit accurate data, the lack of validation in such registries does constitute a weakness. Also, apart from life status, later clinical and quality-of-life follow-up is limited. Nevertheless, planned linkage with the other NICOR registries will allow determination of many important future events, such as recurrent need for later cardiac and cardiothoracic surgical interventions | The main strengths are the inclusion of all consecutive patients treated in the UK, regardless of device manufacturer or access route | NS | Researchers do not have access to any patient identifiers. A data-sharing agreement containing a data-governance framework has been created, and is available from the NICOR web site. Through this mechanism, the dataset is available to other research groups, under the guidance of the DMG (Data management group). The DMG acts as a review panel for initial screening of academic requests for access to the TAVI dataset |
| O'Dowd A.  | Government considers a national implant register in review of cosmetic procedures                                                                                            | 2012 | BMJ news article | Cosmetic surgery                                | NS                                                                                                                                                                                                                                                                                                                                                                                                                                                                                                                                                         | NS                                                                                                                                                                                                                                                                                                                                                                                                                                                                                                                                                                                                                                                                                                                                                          | BMJ News article that discusses regulation of cosmetic surgery interventions including a potential national register                                                                                                                                                                                                                                                                                                                                                                                                                                                                                                                                                                                                | NS | NS                                                                                                                                                                                                                                          | NS                                                                                                                                                                                                                                                                               | NS                                                                                                                                                                                                                                                                                                 | NS                                                                                                                                                                                                                                                                                                                                                                                                                                                                                                                                                                                                                                                                                                                                                                                                                                                                                                                             | NS                                                                                                                                                                                                                                                                                                                                                                                                                                                                                                                                                                                                                                                                                                                                                                                                                                                                                                                                                                                                                                                                                                                                                                                                                                                                                                                                              | NS                                                                                                                                                                                                                                                                                                                                                                                                                                                                                                                                                                                                                                                                            | NS | NS                                                                                                                                  | NS                                                                                                                                                                                                                                                                                                                                                                                                                                                                                                                                                                                                                                                                                                                                                                                                                                 | NS                                                                                                                                    | NS |                                                                                                                                                                                                                                                                                                                                                                                                                                   |
|            |                                                                                                                                                                              |      |                  |                                                 |                                                                                                                                                                                                                                                                                                                                                                                                                                                                                                                                                            |                                                                                                                                                                                                                                                                                                                                                                                                                                                                                                                                                                                                                                                                                                                                                             |                                                                                                                                                                                                                                                                                                                                                                                                                                                                                                                                                                                                                                                                                                                     |    |                                                                                                                                                                                                                                             | The information could include the date and place of the operation and the clinical outcome, as well as a method of identifying the patients who received the product                                                                                                             |                                                                                                                                                                                                                                                                                                    |                                                                                                                                                                                                                                                                                                                                                                                                                                                                                                                                                                                                                                                                                                                                                                                                                                                                                                                                |                                                                                                                                                                                                                                                                                                                                                                                                                                                                                                                                                                                                                                                                                                                                                                                                                                                                                                                                                                                                                                                                                                                                                                                                                                                                                                                                                 |                                                                                                                                                                                                                                                                                                                                                                                                                                                                                                                                                                                                                                                                               |    | Can act to protect patients from harm                                                                                               | NS                                                                                                                                                                                                                                                                                                                                                                                                                                                                                                                                                                                                                                                                                                                                                                                                                                 | NS                                                                                                                                    |    |                                                                                                                                                                                                                                                                                                                                                                                                                                   |



Trusts rely on clinical coders to extract information from unstructured medical records, and although this professional group has considerable expertise, selection of the most clinically appropriate codes requires close contact with clinicians. This rarely happens in the NHS. The electronic data collection process needs to be tempered with caution and that the right design for the system is crucial. A common thread among information technology (IT) projects in health has been their combination of ambition and limited appreciation of scale. This has perhaps been most apparent in the United Kingdom's £11.4 billion National Programme for IT, later renamed Connecting for Health. It is disappointing that the ambition of the project was not matched by delivery. In 2011 the National Audit Office concluded that the programme, as initially conceived, will now never be delivered.

improve care, as demonstrated by the cardiac surgeons from England who now boast one of the lowest mortality rates for cardiac surgery in Europe. Data matter because they are used by employers to make management decisions; by commissioners to determine how much money to pay for services; and by the government for its various schemes, such as NHS Choices. This is happening now, and in the future data will be increasingly used to assess the quality of services provided by hospitals, departments, and most likely eventually individual surgeons. Data can be gathered to assist in management discussions, such as departmental workload and resource planning, and for the purposes of audit and research. Most importantly, good data will enable clinicians and departments to improve their practice and the care they give

For peer review

|              |                                                                                            |      |                                               |                                                                          |    |                                                    |                                                                                                                                  |                  |                                                               |    |                                                                                                                                                                                                                                                                         |                                                                                                                                                                   |                                                                                                                                                                               |                                                                                                                                                   |    |    |                                                                                                                                                                                                                                                                                                                                                                                                                                                                                                                                                                                                                                                                                                                                                                     |    |    |    |  |  |
|--------------|--------------------------------------------------------------------------------------------|------|-----------------------------------------------|--------------------------------------------------------------------------|----|----------------------------------------------------|----------------------------------------------------------------------------------------------------------------------------------|------------------|---------------------------------------------------------------|----|-------------------------------------------------------------------------------------------------------------------------------------------------------------------------------------------------------------------------------------------------------------------------|-------------------------------------------------------------------------------------------------------------------------------------------------------------------|-------------------------------------------------------------------------------------------------------------------------------------------------------------------------------|---------------------------------------------------------------------------------------------------------------------------------------------------|----|----|---------------------------------------------------------------------------------------------------------------------------------------------------------------------------------------------------------------------------------------------------------------------------------------------------------------------------------------------------------------------------------------------------------------------------------------------------------------------------------------------------------------------------------------------------------------------------------------------------------------------------------------------------------------------------------------------------------------------------------------------------------------------|----|----|----|--|--|
| Uberoi R.    | British society of interventional radiology: Biliary drainage and stenting registry (BDSR) | 2012 | Biliary Drainage and Stenting Registry (BDSR) | Percutaneous biliary drainage (PTBD) with or without adjunctive stenting | NS | British Society of Interventional Radiology (BSIR) | To assess current practice in the United Kingdom and use the data collected to provide guidance for improvements in patient care | Web-based system | The registry was funded by the BSIR on behalf of its members. | NS | Demographic, pre- and postintervention laboratory data, technical and clinical outcomes at discharge, known diagnosis, indications for procedure, procedural information, antibiotic prophylaxis, general anaesthetic/sedation, complications (morbidity and mortality) | Collection and analysis was performed by Dendrite Clinical Systems Ltd, utilising Microsoft Access, Excel, and Crystal Reports XI from business objects software. | Appropriate time and resources need to be allocated to allow good quality data collection, which should form an essential part of medical practice to maintain high standards | From November 1, 2006 to August 19, 2009: 833 procedures were recorded and entered by 62 operators from 44 institutions within the United Kingdom | NS | NS | Time pressures and other NHS commitments act as a disincentive. One of the major deficiencies of the registry was that the cause of death was not established, this will be one of the goals of future data collection and analysis. Data quality and completeness is a significant concern in this registry, which represents a prospective voluntary data collection. A criticism of voluntary registries is that data entry often is incomplete and they represent a nonconsecutive patient group and may not be representative of the entire treated patient population. It is likely that some questions and the terminology used were not clear to all operators. For example, operators were asked to stratify patients' complications into minor and major. | NS | NS | NS |  |  |
| Das N.       |                                                                                            |      |                                               |                                                                          |    |                                                    |                                                                                                                                  |                  |                                                               |    |                                                                                                                                                                                                                                                                         |                                                                                                                                                                   |                                                                                                                                                                               |                                                                                                                                                   |    |    |                                                                                                                                                                                                                                                                                                                                                                                                                                                                                                                                                                                                                                                                                                                                                                     |    |    |    |  |  |
| Moss J.      |                                                                                            |      |                                               |                                                                          |    |                                                    |                                                                                                                                  |                  |                                                               |    |                                                                                                                                                                                                                                                                         |                                                                                                                                                                   |                                                                                                                                                                               |                                                                                                                                                   |    |    |                                                                                                                                                                                                                                                                                                                                                                                                                                                                                                                                                                                                                                                                                                                                                                     |    |    |    |  |  |
| Robertson I. |                                                                                            |      |                                               |                                                                          |    |                                                    |                                                                                                                                  |                  |                                                               |    |                                                                                                                                                                                                                                                                         |                                                                                                                                                                   |                                                                                                                                                                               |                                                                                                                                                   |    |    |                                                                                                                                                                                                                                                                                                                                                                                                                                                                                                                                                                                                                                                                                                                                                                     |    |    |    |  |  |

1  
2  
3  
4  
5  
6  
7  
8  
9  
10  
11  
12  
13  
14  
15  
16  
17  
18  
19  
20  
21  
22  
23  
24  
25  
26  
27  
28  
29  
30  
31  
32  
33  
34  
35  
36  
37  
38  
39  
40  
41  
42  
43  
44  
45  
46  
47

23



1  
2  
3  
4  
5  
6  
7  
8  
9  
10  
11  
12  
13  
14  
15  
16  
17  
18  
19  
20  
21  
22  
23  
24  
25  
26  
27  
28  
29  
30  
31  
32  
33  
34  
35  
36  
37  
38  
39  
40  
41  
42  
43  
44  
45  
46  
47

|                  |                                                                                                                                                    |      |                  |                                                 |    |                                                                                                                     |                                                                                                                     |                                                                                                                                                                                                                                                                                                                                                                        |    |                                                                                                                                           |    |                                              |                                                                                   |                                                                                                                                                                                                                                                                                                                                                                                                                                                                                                                                                                                                                                                                                                               |    |                                                                                                                                                                                                                                                                                                                                                                                                                                                                                                                                                                                                                                               |    |    |                                                                                                                                                                                                                                                                                                                                   |                                                                                                                                                                                                                                                                                                           |    |                                                                                                                                                                                                                      |    |  |
|------------------|----------------------------------------------------------------------------------------------------------------------------------------------------|------|------------------|-------------------------------------------------|----|---------------------------------------------------------------------------------------------------------------------|---------------------------------------------------------------------------------------------------------------------|------------------------------------------------------------------------------------------------------------------------------------------------------------------------------------------------------------------------------------------------------------------------------------------------------------------------------------------------------------------------|----|-------------------------------------------------------------------------------------------------------------------------------------------|----|----------------------------------------------|-----------------------------------------------------------------------------------|---------------------------------------------------------------------------------------------------------------------------------------------------------------------------------------------------------------------------------------------------------------------------------------------------------------------------------------------------------------------------------------------------------------------------------------------------------------------------------------------------------------------------------------------------------------------------------------------------------------------------------------------------------------------------------------------------------------|----|-----------------------------------------------------------------------------------------------------------------------------------------------------------------------------------------------------------------------------------------------------------------------------------------------------------------------------------------------------------------------------------------------------------------------------------------------------------------------------------------------------------------------------------------------------------------------------------------------------------------------------------------------|----|----|-----------------------------------------------------------------------------------------------------------------------------------------------------------------------------------------------------------------------------------------------------------------------------------------------------------------------------------|-----------------------------------------------------------------------------------------------------------------------------------------------------------------------------------------------------------------------------------------------------------------------------------------------------------|----|----------------------------------------------------------------------------------------------------------------------------------------------------------------------------------------------------------------------|----|--|
| Wood E.          | Long term outcomes after transcatheter aortic valve implantation in high-risk patients with severe aortic stenosis: The U.K. TAVI (United Kingdom) | 2011 | UK TAVI Registry | Transcatheter Aortic Valve implantation surgery | NS | Society for Cardiothoracic Surgery in Great Britain and Ireland and the British Cardiovascular Intervention Society | Society for Cardiothoracic Surgery in Great Britain and Ireland and the British Cardiovascular Intervention Society | Aim of registry: To coordinate and monitor the practice and dissemination of TAVI. The purpose of this project was to define the characteristics and clinical outcomes of the patient population treated with TAVI (regardless of technology or access route) in every (i.e., nonselected) center undertaking TAVI                                                     | NS | By society for Cardiothoracic Surgery in Great Britain and Ireland and the British Cardiovascular Intervention Society, Web-based system. | NS | Cardiothoracic Society agreed on the dataset | Demographics, risk factors, and outcomes, complications (morbidity and mortality) | Mortality tracking was undertaken by the National Health Service Central Register by using unique patient identifiers. It is a legal requirement for all deaths in the United Kingdom to be registered with this body. It is not possible to effect any form of burial/cremation or similar process for the deceased without such registration. Thus, tracking yields very robust results. Survival status for the whole cohort of patients was determined through the NHS Central Register. All fields were examined for missing data or extreme values, and contributing units were asked to complete or correct data where possible. Extreme data were verified and excluded only if found to be erroneous | NS | Data from 877 implants in 870 patients were submitted to the CCAD. Completeness of valid data was 99.6% for demographic data, 96.4% for risk factors, 97.4% for procedural variables, and 98.5% for in hospital outcomes. Eighteen of the 25 units had valid data completeness of >98%. Mortality tracking was achieved in 100% of patients. The U.K. TAVI Registry is unique in that it has captured every TAVI performed at all the 25 active units within England and Wales, and thus includes the entire "learning curve" and early experience of adopting centers without any publication bias that might be induced by center selection | NS | NS | Whereas data on the numbers of procedures and survival outcome are believed to be extremely robust, those concerning morbidity and complications are likely less so. Although internal consistency checks have been applied, these data are self-reported and have not been systematically validated or independently adjudicated | The registry encompasses a substantial number of implants with both commercially available technologies utilizing all of the described access routes, and has robust (100%) overall mortality tracking. It is also the first report of outcomes beyond 1 year for a substantial number of patients (>850) | NS | All processes performed in compliance with current U.K. Data Protection and Information Governance legislation. All patients provided signed, informed consent. Data is encrypted before transfer to central servers |    |  |
| Ludman P.        |                                                                                                                                                    |      |                  |                                                 |    |                                                                                                                     |                                                                                                                     |                                                                                                                                                                                                                                                                                                                                                                        |    |                                                                                                                                           |    |                                              |                                                                                   |                                                                                                                                                                                                                                                                                                                                                                                                                                                                                                                                                                                                                                                                                                               |    |                                                                                                                                                                                                                                                                                                                                                                                                                                                                                                                                                                                                                                               |    |    |                                                                                                                                                                                                                                                                                                                                   |                                                                                                                                                                                                                                                                                                           |    |                                                                                                                                                                                                                      |    |  |
| De Belder M.A.   |                                                                                                                                                    |      |                  |                                                 |    |                                                                                                                     |                                                                                                                     |                                                                                                                                                                                                                                                                                                                                                                        |    |                                                                                                                                           |    |                                              |                                                                                   |                                                                                                                                                                                                                                                                                                                                                                                                                                                                                                                                                                                                                                                                                                               |    |                                                                                                                                                                                                                                                                                                                                                                                                                                                                                                                                                                                                                                               |    |    |                                                                                                                                                                                                                                                                                                                                   |                                                                                                                                                                                                                                                                                                           |    |                                                                                                                                                                                                                      |    |  |
| Bridgewater B.   |                                                                                                                                                    |      |                  |                                                 |    |                                                                                                                     |                                                                                                                     |                                                                                                                                                                                                                                                                                                                                                                        |    |                                                                                                                                           |    |                                              |                                                                                   |                                                                                                                                                                                                                                                                                                                                                                                                                                                                                                                                                                                                                                                                                                               |    |                                                                                                                                                                                                                                                                                                                                                                                                                                                                                                                                                                                                                                               |    |    |                                                                                                                                                                                                                                                                                                                                   |                                                                                                                                                                                                                                                                                                           |    |                                                                                                                                                                                                                      |    |  |
| Cunningham A.D.  |                                                                                                                                                    |      |                  |                                                 |    |                                                                                                                     |                                                                                                                     |                                                                                                                                                                                                                                                                                                                                                                        |    |                                                                                                                                           |    |                                              |                                                                                   |                                                                                                                                                                                                                                                                                                                                                                                                                                                                                                                                                                                                                                                                                                               |    |                                                                                                                                                                                                                                                                                                                                                                                                                                                                                                                                                                                                                                               |    |    |                                                                                                                                                                                                                                                                                                                                   |                                                                                                                                                                                                                                                                                                           |    |                                                                                                                                                                                                                      |    |  |
| Young C.P.       |                                                                                                                                                    |      |                  |                                                 |    |                                                                                                                     |                                                                                                                     |                                                                                                                                                                                                                                                                                                                                                                        |    |                                                                                                                                           |    |                                              |                                                                                   |                                                                                                                                                                                                                                                                                                                                                                                                                                                                                                                                                                                                                                                                                                               |    |                                                                                                                                                                                                                                                                                                                                                                                                                                                                                                                                                                                                                                               |    |    |                                                                                                                                                                                                                                                                                                                                   |                                                                                                                                                                                                                                                                                                           |    |                                                                                                                                                                                                                      |    |  |
| Thomas M.        |                                                                                                                                                    |      |                  |                                                 |    |                                                                                                                     |                                                                                                                     |                                                                                                                                                                                                                                                                                                                                                                        |    |                                                                                                                                           |    |                                              |                                                                                   |                                                                                                                                                                                                                                                                                                                                                                                                                                                                                                                                                                                                                                                                                                               |    |                                                                                                                                                                                                                                                                                                                                                                                                                                                                                                                                                                                                                                               |    |    |                                                                                                                                                                                                                                                                                                                                   |                                                                                                                                                                                                                                                                                                           |    |                                                                                                                                                                                                                      |    |  |
| Kovac J.         |                                                                                                                                                    |      |                  |                                                 |    |                                                                                                                     |                                                                                                                     |                                                                                                                                                                                                                                                                                                                                                                        |    |                                                                                                                                           |    |                                              |                                                                                   |                                                                                                                                                                                                                                                                                                                                                                                                                                                                                                                                                                                                                                                                                                               |    |                                                                                                                                                                                                                                                                                                                                                                                                                                                                                                                                                                                                                                               |    |    |                                                                                                                                                                                                                                                                                                                                   |                                                                                                                                                                                                                                                                                                           |    |                                                                                                                                                                                                                      |    |  |
| Spyt T.          |                                                                                                                                                    |      |                  |                                                 |    |                                                                                                                     |                                                                                                                     |                                                                                                                                                                                                                                                                                                                                                                        |    |                                                                                                                                           |    |                                              |                                                                                   |                                                                                                                                                                                                                                                                                                                                                                                                                                                                                                                                                                                                                                                                                                               |    |                                                                                                                                                                                                                                                                                                                                                                                                                                                                                                                                                                                                                                               |    |    |                                                                                                                                                                                                                                                                                                                                   |                                                                                                                                                                                                                                                                                                           |    |                                                                                                                                                                                                                      |    |  |
| MacCarthy P.A.   |                                                                                                                                                    |      |                  |                                                 |    |                                                                                                                     |                                                                                                                     |                                                                                                                                                                                                                                                                                                                                                                        |    |                                                                                                                                           |    |                                              |                                                                                   |                                                                                                                                                                                                                                                                                                                                                                                                                                                                                                                                                                                                                                                                                                               |    |                                                                                                                                                                                                                                                                                                                                                                                                                                                                                                                                                                                                                                               |    |    |                                                                                                                                                                                                                                                                                                                                   |                                                                                                                                                                                                                                                                                                           |    |                                                                                                                                                                                                                      |    |  |
| Wendler O.       |                                                                                                                                                    |      |                  |                                                 |    |                                                                                                                     |                                                                                                                     |                                                                                                                                                                                                                                                                                                                                                                        |    |                                                                                                                                           |    |                                              |                                                                                   |                                                                                                                                                                                                                                                                                                                                                                                                                                                                                                                                                                                                                                                                                                               |    |                                                                                                                                                                                                                                                                                                                                                                                                                                                                                                                                                                                                                                               |    |    |                                                                                                                                                                                                                                                                                                                                   |                                                                                                                                                                                                                                                                                                           |    |                                                                                                                                                                                                                      |    |  |
| Hildick-Smith D. |                                                                                                                                                    |      |                  |                                                 |    |                                                                                                                     |                                                                                                                     |                                                                                                                                                                                                                                                                                                                                                                        |    |                                                                                                                                           |    |                                              |                                                                                   |                                                                                                                                                                                                                                                                                                                                                                                                                                                                                                                                                                                                                                                                                                               |    |                                                                                                                                                                                                                                                                                                                                                                                                                                                                                                                                                                                                                                               |    |    |                                                                                                                                                                                                                                                                                                                                   |                                                                                                                                                                                                                                                                                                           |    |                                                                                                                                                                                                                      |    |  |
| Davies S.W.      |                                                                                                                                                    |      |                  |                                                 |    |                                                                                                                     |                                                                                                                     |                                                                                                                                                                                                                                                                                                                                                                        |    |                                                                                                                                           |    |                                              |                                                                                   |                                                                                                                                                                                                                                                                                                                                                                                                                                                                                                                                                                                                                                                                                                               |    |                                                                                                                                                                                                                                                                                                                                                                                                                                                                                                                                                                                                                                               |    |    |                                                                                                                                                                                                                                                                                                                                   |                                                                                                                                                                                                                                                                                                           |    |                                                                                                                                                                                                                      |    |  |
| Trivedi U.       |                                                                                                                                                    |      |                  |                                                 |    |                                                                                                                     |                                                                                                                     |                                                                                                                                                                                                                                                                                                                                                                        |    |                                                                                                                                           |    |                                              |                                                                                   |                                                                                                                                                                                                                                                                                                                                                                                                                                                                                                                                                                                                                                                                                                               |    |                                                                                                                                                                                                                                                                                                                                                                                                                                                                                                                                                                                                                                               |    |    |                                                                                                                                                                                                                                                                                                                                   |                                                                                                                                                                                                                                                                                                           |    |                                                                                                                                                                                                                      |    |  |
| Blackman D.J.    |                                                                                                                                                    |      |                  |                                                 |    |                                                                                                                     |                                                                                                                     |                                                                                                                                                                                                                                                                                                                                                                        |    |                                                                                                                                           |    |                                              |                                                                                   |                                                                                                                                                                                                                                                                                                                                                                                                                                                                                                                                                                                                                                                                                                               |    |                                                                                                                                                                                                                                                                                                                                                                                                                                                                                                                                                                                                                                               |    |    |                                                                                                                                                                                                                                                                                                                                   |                                                                                                                                                                                                                                                                                                           |    |                                                                                                                                                                                                                      |    |  |
| Levy R.D.        |                                                                                                                                                    |      |                  |                                                 |    |                                                                                                                     |                                                                                                                     |                                                                                                                                                                                                                                                                                                                                                                        |    |                                                                                                                                           |    |                                              |                                                                                   |                                                                                                                                                                                                                                                                                                                                                                                                                                                                                                                                                                                                                                                                                                               |    |                                                                                                                                                                                                                                                                                                                                                                                                                                                                                                                                                                                                                                               |    |    |                                                                                                                                                                                                                                                                                                                                   |                                                                                                                                                                                                                                                                                                           |    |                                                                                                                                                                                                                      |    |  |
| Brecker S.J.D.   |                                                                                                                                                    |      |                  |                                                 |    |                                                                                                                     |                                                                                                                     |                                                                                                                                                                                                                                                                                                                                                                        |    |                                                                                                                                           |    |                                              |                                                                                   |                                                                                                                                                                                                                                                                                                                                                                                                                                                                                                                                                                                                                                                                                                               |    |                                                                                                                                                                                                                                                                                                                                                                                                                                                                                                                                                                                                                                               |    |    |                                                                                                                                                                                                                                                                                                                                   |                                                                                                                                                                                                                                                                                                           |    |                                                                                                                                                                                                                      |    |  |
| Baumbach A.      |                                                                                                                                                    |      |                  |                                                 |    |                                                                                                                     |                                                                                                                     |                                                                                                                                                                                                                                                                                                                                                                        |    |                                                                                                                                           |    |                                              |                                                                                   |                                                                                                                                                                                                                                                                                                                                                                                                                                                                                                                                                                                                                                                                                                               |    |                                                                                                                                                                                                                                                                                                                                                                                                                                                                                                                                                                                                                                               |    |    |                                                                                                                                                                                                                                                                                                                                   |                                                                                                                                                                                                                                                                                                           |    |                                                                                                                                                                                                                      |    |  |
| Daniel T.        |                                                                                                                                                    |      |                  |                                                 |    |                                                                                                                     |                                                                                                                     |                                                                                                                                                                                                                                                                                                                                                                        |    |                                                                                                                                           |    |                                              |                                                                                   |                                                                                                                                                                                                                                                                                                                                                                                                                                                                                                                                                                                                                                                                                                               |    |                                                                                                                                                                                                                                                                                                                                                                                                                                                                                                                                                                                                                                               |    |    |                                                                                                                                                                                                                                                                                                                                   |                                                                                                                                                                                                                                                                                                           |    |                                                                                                                                                                                                                      |    |  |
| Gray H.          |                                                                                                                                                    |      |                  |                                                 |    |                                                                                                                     |                                                                                                                     |                                                                                                                                                                                                                                                                                                                                                                        |    |                                                                                                                                           |    |                                              |                                                                                   |                                                                                                                                                                                                                                                                                                                                                                                                                                                                                                                                                                                                                                                                                                               |    |                                                                                                                                                                                                                                                                                                                                                                                                                                                                                                                                                                                                                                               |    |    |                                                                                                                                                                                                                                                                                                                                   |                                                                                                                                                                                                                                                                                                           |    |                                                                                                                                                                                                                      |    |  |
| Mullen M.J.      |                                                                                                                                                    |      |                  |                                                 |    |                                                                                                                     |                                                                                                                     |                                                                                                                                                                                                                                                                                                                                                                        |    |                                                                                                                                           |    |                                              |                                                                                   |                                                                                                                                                                                                                                                                                                                                                                                                                                                                                                                                                                                                                                                                                                               |    |                                                                                                                                                                                                                                                                                                                                                                                                                                                                                                                                                                                                                                               |    |    |                                                                                                                                                                                                                                                                                                                                   |                                                                                                                                                                                                                                                                                                           |    |                                                                                                                                                                                                                      |    |  |
| Moller H.        | Completeness of case ascertainment and survival time error in English cancer registries: Impact on 1-year survival estimates                       | 2011 | Research paper   | Colorectal, lung, and breast cancer patients    | NS | NS                                                                                                                  | NS                                                                                                                  | This study linked routine cancer registration records for colorectal, lung, and breast cancer patients with information from the Hospital Episode Statistics (HES) database for the period 2001–2007. Based on record linkage with the HES database, records missing in the cancer register were identified and the completeness of the cancer registers were assessed | NS | NS                                                                                                                                        | NS | NS                                           | NS                                                                                | NS                                                                                                                                                                                                                                                                                                                                                                                                                                                                                                                                                                                                                                                                                                            | NS | NS                                                                                                                                                                                                                                                                                                                                                                                                                                                                                                                                                                                                                                            | NS | NS | NS                                                                                                                                                                                                                                                                                                                                | NS                                                                                                                                                                                                                                                                                                        | NS | NS                                                                                                                                                                                                                   | NS |  |
| Richards S.      |                                                                                                                                                    |      |                  |                                                 |    |                                                                                                                     |                                                                                                                     |                                                                                                                                                                                                                                                                                                                                                                        |    |                                                                                                                                           |    |                                              |                                                                                   |                                                                                                                                                                                                                                                                                                                                                                                                                                                                                                                                                                                                                                                                                                               |    |                                                                                                                                                                                                                                                                                                                                                                                                                                                                                                                                                                                                                                               |    |    |                                                                                                                                                                                                                                                                                                                                   |                                                                                                                                                                                                                                                                                                           |    |                                                                                                                                                                                                                      |    |  |
| Hanchett N.      |                                                                                                                                                    |      |                  |                                                 |    |                                                                                                                     |                                                                                                                     |                                                                                                                                                                                                                                                                                                                                                                        |    |                                                                                                                                           |    |                                              |                                                                                   |                                                                                                                                                                                                                                                                                                                                                                                                                                                                                                                                                                                                                                                                                                               |    |                                                                                                                                                                                                                                                                                                                                                                                                                                                                                                                                                                                                                                               |    |    |                                                                                                                                                                                                                                                                                                                                   |                                                                                                                                                                                                                                                                                                           |    |                                                                                                                                                                                                                      |    |  |
| Riaz S.P.        |                                                                                                                                                    |      |                  |                                                 |    |                                                                                                                     |                                                                                                                     |                                                                                                                                                                                                                                                                                                                                                                        |    |                                                                                                                                           |    |                                              |                                                                                   |                                                                                                                                                                                                                                                                                                                                                                                                                                                                                                                                                                                                                                                                                                               |    |                                                                                                                                                                                                                                                                                                                                                                                                                                                                                                                                                                                                                                               |    |    |                                                                                                                                                                                                                                                                                                                                   |                                                                                                                                                                                                                                                                                                           |    |                                                                                                                                                                                                                      |    |  |
| Luchtenborg M.   |                                                                                                                                                    |      |                  |                                                 |    |                                                                                                                     |                                                                                                                     |                                                                                                                                                                                                                                                                                                                                                                        |    |                                                                                                                                           |    |                                              |                                                                                   |                                                                                                                                                                                                                                                                                                                                                                                                                                                                                                                                                                                                                                                                                                               |    |                                                                                                                                                                                                                                                                                                                                                                                                                                                                                                                                                                                                                                               |    |    |                                                                                                                                                                                                                                                                                                                                   |                                                                                                                                                                                                                                                                                                           |    |                                                                                                                                                                                                                      |    |  |
| Holmberg L.      |                                                                                                                                                    |      |                  |                                                 |    |                                                                                                                     |                                                                                                                     |                                                                                                                                                                                                                                                                                                                                                                        |    |                                                                                                                                           |    |                                              |                                                                                   |                                                                                                                                                                                                                                                                                                                                                                                                                                                                                                                                                                                                                                                                                                               |    |                                                                                                                                                                                                                                                                                                                                                                                                                                                                                                                                                                                                                                               |    |    |                                                                                                                                                                                                                                                                                                                                   |                                                                                                                                                                                                                                                                                                           |    |                                                                                                                                                                                                                      |    |  |
| Robinson D.      |                                                                                                                                                    |      |                  |                                                 |    |                                                                                                                     |                                                                                                                     |                                                                                                                                                                                                                                                                                                                                                                        |    |                                                                                                                                           |    |                                              |                                                                                   |                                                                                                                                                                                                                                                                                                                                                                                                                                                                                                                                                                                                                                                                                                               |    |                                                                                                                                                                                                                                                                                                                                                                                                                                                                                                                                                                                                                                               |    |    |                                                                                                                                                                                                                                                                                                                                   |                                                                                                                                                                                                                                                                                                           |    |                                                                                                                                                                                                                      |    |  |

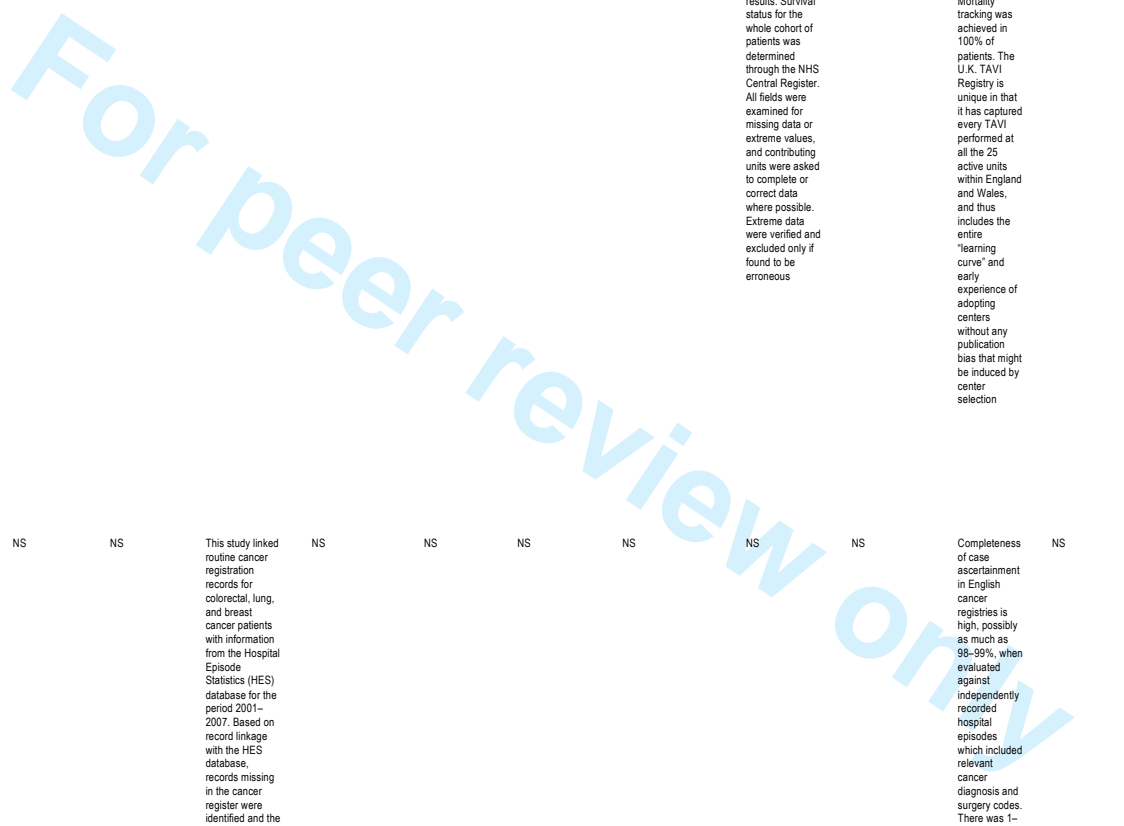

Van Gijn and  
van De  
Velde

Quality assurance  
through outcome  
registration in  
colorectal cancer  
- An ECCO  
initiative for  
Europe

201  
1

Commentary

Colorectal cancer

NS

Hospitals and  
surgeons can  
improve their  
results by  
learning from  
their own  
outcome  
statistics and  
those of their  
colleagues.  
Identifying,  
communicating  
and adopting  
'best practices'  
may improve  
the quality of  
care  
nationwide.  
The most  
important  
advantage of  
these audit  
registries  
compared with  
clinical trials is  
the fact that  
they include  
the entire  
patient  
population  
without  
excluding  
certain patient  
groups.  
Benefits of  
these registries  
can be seen  
across Europe.  
For example in  
2001, The  
Association of  
Coloproctology  
of Great Britain  
and Ireland  
(ACPGBI)  
started the  
National Bowel  
Cancer Audit  
Programme  
(NBOCAP). In  
2008, 95% of  
trusts in  
England and  
Wales  
submitted data.  
Within 5 years,  
30 day  
mortality  
dropped from  
7% to 4.5%.  
National audit  
registries in  
surgical  
oncology have  
led to  
improvements  
with a greater  
impact on  
survival than  
any of the  
adjuvant  
therapies  
currently under  
study.  
Moreover, they  
offer the  
possibility to  
perform  
research on  
patient groups  
that are usually  
excluded from  
clinical trials  
such as the  
elderly

Data base  
prospective,  
complete,  
case-mix  
adjusted and  
preferably  
collected by  
independent  
investigators

For peer review only

1  
2  
3  
4  
5  
6  
7  
8  
9  
10  
11  
12  
13  
14  
15  
16  
17  
18  
19  
20  
21  
22  
23  
24  
25  
26  
27  
28  
29  
30  
31  
32  
33  
34  
35  
36  
37  
38  
39  
40  
41  
42  
43  
44  
45  
46  
47



to look for hospitals of potential concern, followed up by targeted site visits to assess accuracy of data entry .

strategy to increase the research outputs from the database and has activated a data-sharing agreement for that purpose. There has been much debate over publishing named surgeon data, but what is without question is that there have been marked improvements in risk-adjusted mortality for cardiac surgery in the UK over the past 10 years. There is no evidence that the initiative to collect, benchmark and publish these data has been associated with significant 'risk-adverse' behaviour among surgeons in the UK. This should be reassuring to all stakeholders

For peer review only

1  
2  
3  
4  
5  
6  
7  
8  
9  
10  
11  
12  
13  
14  
15  
16  
17  
18  
19  
20  
21  
22  
23  
24  
25  
26  
27  
28  
29  
30  
31  
32  
33  
34  
35  
36  
37  
38  
39  
40  
41  
42  
43  
44  
45  
46  
47



1  
2  
3  
4  
5  
6  
7  
8  
9  
10  
11  
12  
13  
14  
15  
16  
17  
18  
19  
20  
21  
22  
23  
24  
25  
26  
27  
28  
29  
30  
31  
32  
33  
34  
35  
36  
37  
38  
39  
40  
41  
42  
43  
44  
45  
46  
47

|      |                                                                                                                  |      |                                                         |               |                                                                                                  |                      |                                                                               |                         |                                      |                                                                                                                                                                                                                                                                                                                                                                                                                                                                                                                                                                                                                                                                                                                                                                                                                                                                                                                                                                                                                                                                                                  |                                                                                                                                                                                                                                                                                                                                                                                                                                                                                                                                                                                                                                                                                                                                                                                                                                                                                                                                                                                                                                                                                                |                                                                                                                                                                                                                                                                                                                                            |                                                                                                                                                                                                                                                                                                                                                                                                                                                                                                                                                                                                                                                                                                                                                                                                                                                                                                                                                                                                                                                                                                                                                                                                                                                                                                       |    |    |                                                                                                                                                                                                                                                                                                                                                                                                                                                                                                                                                                                                                                                                 |                                                                                                                                                                    |    |                                                                                                                                                                                                                                                                                                                                                                                                                                                                                                                                                                                                                                                                                                                              |
|------|------------------------------------------------------------------------------------------------------------------|------|---------------------------------------------------------|---------------|--------------------------------------------------------------------------------------------------|----------------------|-------------------------------------------------------------------------------|-------------------------|--------------------------------------|--------------------------------------------------------------------------------------------------------------------------------------------------------------------------------------------------------------------------------------------------------------------------------------------------------------------------------------------------------------------------------------------------------------------------------------------------------------------------------------------------------------------------------------------------------------------------------------------------------------------------------------------------------------------------------------------------------------------------------------------------------------------------------------------------------------------------------------------------------------------------------------------------------------------------------------------------------------------------------------------------------------------------------------------------------------------------------------------------|------------------------------------------------------------------------------------------------------------------------------------------------------------------------------------------------------------------------------------------------------------------------------------------------------------------------------------------------------------------------------------------------------------------------------------------------------------------------------------------------------------------------------------------------------------------------------------------------------------------------------------------------------------------------------------------------------------------------------------------------------------------------------------------------------------------------------------------------------------------------------------------------------------------------------------------------------------------------------------------------------------------------------------------------------------------------------------------------|--------------------------------------------------------------------------------------------------------------------------------------------------------------------------------------------------------------------------------------------------------------------------------------------------------------------------------------------|-------------------------------------------------------------------------------------------------------------------------------------------------------------------------------------------------------------------------------------------------------------------------------------------------------------------------------------------------------------------------------------------------------------------------------------------------------------------------------------------------------------------------------------------------------------------------------------------------------------------------------------------------------------------------------------------------------------------------------------------------------------------------------------------------------------------------------------------------------------------------------------------------------------------------------------------------------------------------------------------------------------------------------------------------------------------------------------------------------------------------------------------------------------------------------------------------------------------------------------------------------------------------------------------------------|----|----|-----------------------------------------------------------------------------------------------------------------------------------------------------------------------------------------------------------------------------------------------------------------------------------------------------------------------------------------------------------------------------------------------------------------------------------------------------------------------------------------------------------------------------------------------------------------------------------------------------------------------------------------------------------------|--------------------------------------------------------------------------------------------------------------------------------------------------------------------|----|------------------------------------------------------------------------------------------------------------------------------------------------------------------------------------------------------------------------------------------------------------------------------------------------------------------------------------------------------------------------------------------------------------------------------------------------------------------------------------------------------------------------------------------------------------------------------------------------------------------------------------------------------------------------------------------------------------------------------|
| 2009 | Clinical outcome data for symptomatic breast cancer: The breast cancer clinical outcome measures (BCCOM) project | 2009 | Breast Cancer Clinical Outcome Measures (BCCOM) Project | Breast cancer | Association of Breast Surgeons, the UKACR (UK Association of Cancer Registries), Breast surgeons | BCCOM Steering Group | To capture monitor current practice of treatment of symptomatic breast cancer | By BCCOM Steering Group | Breakthrough Breast Cancer (charity) | Demographics, diagnosis information, tumour characteristics, surrogate outcome measures: 1) Number and proportion of breast cancers for which complete information is received 2) Number of symptomatic and screen-detected breast cancers treated in a hospital per annum 3) Number and proportion of breast cancers given medical treatment only 5) Number and proportion of breast cancers treated surgically 6) Mastectomy rate by breast size: <15 > 15 and <20; >20 and <35; >35 and <50; >50 mm invasive diameter 7) Number and proportion of invasive breast cancers for which nodal status is known 8) Number and proportion of histologically node-negative invasive breast cancers for which more than seven nodes were harvested 9) Number and proportion of invasive breast cancers treated by breast-conserving surgery and receiving radiotherapy 10) Number and proportion of node-positive patients with invasive breast cancers, aged <60 years, receiving chemotherapy, number and proportion of patients with ER-positive invasive breast cancers, receiving hormone therapy | Data on all newly-diagnosed primary symptomatic breast cancers are obtained from the UK cancer registries. To validate the accuracy of data collection, cancer registries send the collected data to the concerned consultant breast surgeon. The surgeons in turn are asked to check the validity of data by comparing them with those held on local systems, to make amendments if necessary and to return the data without patient-identifiable details to the BCCOM (Breast Cancer Clinical Outcome Measures) Project team at the West Midlands Cancer Intelligence Unit (WMCIU). Surgeons may submit unchecked data if they do not have the necessary support mechanisms or if they are convinced that the quality of the data is high. Cases are not included if the surgeon attends less than six symptomatic cases in the year, chooses not to participate or is unknown. Cancer registry data are now matched to data held in national data sets, such as Hospital Episode Statistics (HES) - this is useful in collecting data missed by the registry and for cross checking of data | Participation by breast surgeons in the BCCOM Project is not mandatory, but it is strongly encouraged by their professional body, the ABS (Association of Breast Surgeons). The regional symptomatic representatives of ABS are encouraged to review participation in their own areas and to identify ways in which this could be improved | In year 3, 221/488 eligible surgeons submitted data; 16739/32113 cases were submitted. In year 2 (cases diagnosed in 2003), there was a 14% reduction in the total number of cases submitted (14 120 compared with 16 407) and very large reductions in some regions. These decreases are in part because of the more reliable exclusion of ineligible screen-detected cases in year 2, but mainly result from changes in the protocols for data collection in year 2, which required written consent from all surgeons before releasing the data of patients under their care to the lead surgeon in each hospital for validation. In year 3 (cases diagnosed in 2004), the UK cancer registries supplied the BCCOM team with data on all 48 983 diagnosed breast cancers. This provided a denominator of the total number of eligible cases with which participation could be compared and an estimate of the annual breast cancer burden in the United Kingdom could be made. Wales had the highest recruitment of cases at 94%, and the Thames Region, which has the highest number of surgeons and the most number of cases, had by far the lowest recruitment at 29%. In addition to the 1219 cases (3%), which were excluded in year 3 because the surgeons treated fewer than six symptomatic | NS | NS | Initially, (before the BCCOM project started) the capturing of data on symptomatic breast surgery was not funded; and whilst initially they captured 1/3rd of the population caseload, many collaborators failed to continue owing to lack of funding. Although progress in data collection has been improved by central notification of surgeons in most regions, the data underline the continuing difficulty in depending on the voluntary and active participation of individual surgeons in the submission and validation of data. Surgeons must give written permission for release of patient details - but this has not been good for data completeness | Regular audit of surgical practice improves standards and highlights outliers. This BCCOM audit enabled identification of regional variations in surgical practice | NS | From year 2 onwards, the initial protocol for data collection was modified to ensure compliance with Section 60 of the Health and Social Care Act 2001. It was observed that, although non-identifiable data were stored in the BCCOM central database, the flow of information at the beginning of the audit cycle, from cancer registry to surgeon for validation, was at an individual patient level. Therefore, the updated protocol requested that cancer registries obtain consent of individual consultant surgeons before releasing the data to the lead breast surgeon in each hospital. Surgeons must give written permission to for release of patient details - but this has not been good for data completeness |
|------|------------------------------------------------------------------------------------------------------------------|------|---------------------------------------------------------|---------------|--------------------------------------------------------------------------------------------------|----------------------|-------------------------------------------------------------------------------|-------------------------|--------------------------------------|--------------------------------------------------------------------------------------------------------------------------------------------------------------------------------------------------------------------------------------------------------------------------------------------------------------------------------------------------------------------------------------------------------------------------------------------------------------------------------------------------------------------------------------------------------------------------------------------------------------------------------------------------------------------------------------------------------------------------------------------------------------------------------------------------------------------------------------------------------------------------------------------------------------------------------------------------------------------------------------------------------------------------------------------------------------------------------------------------|------------------------------------------------------------------------------------------------------------------------------------------------------------------------------------------------------------------------------------------------------------------------------------------------------------------------------------------------------------------------------------------------------------------------------------------------------------------------------------------------------------------------------------------------------------------------------------------------------------------------------------------------------------------------------------------------------------------------------------------------------------------------------------------------------------------------------------------------------------------------------------------------------------------------------------------------------------------------------------------------------------------------------------------------------------------------------------------------|--------------------------------------------------------------------------------------------------------------------------------------------------------------------------------------------------------------------------------------------------------------------------------------------------------------------------------------------|-------------------------------------------------------------------------------------------------------------------------------------------------------------------------------------------------------------------------------------------------------------------------------------------------------------------------------------------------------------------------------------------------------------------------------------------------------------------------------------------------------------------------------------------------------------------------------------------------------------------------------------------------------------------------------------------------------------------------------------------------------------------------------------------------------------------------------------------------------------------------------------------------------------------------------------------------------------------------------------------------------------------------------------------------------------------------------------------------------------------------------------------------------------------------------------------------------------------------------------------------------------------------------------------------------|----|----|-----------------------------------------------------------------------------------------------------------------------------------------------------------------------------------------------------------------------------------------------------------------------------------------------------------------------------------------------------------------------------------------------------------------------------------------------------------------------------------------------------------------------------------------------------------------------------------------------------------------------------------------------------------------|--------------------------------------------------------------------------------------------------------------------------------------------------------------------|----|------------------------------------------------------------------------------------------------------------------------------------------------------------------------------------------------------------------------------------------------------------------------------------------------------------------------------------------------------------------------------------------------------------------------------------------------------------------------------------------------------------------------------------------------------------------------------------------------------------------------------------------------------------------------------------------------------------------------------|

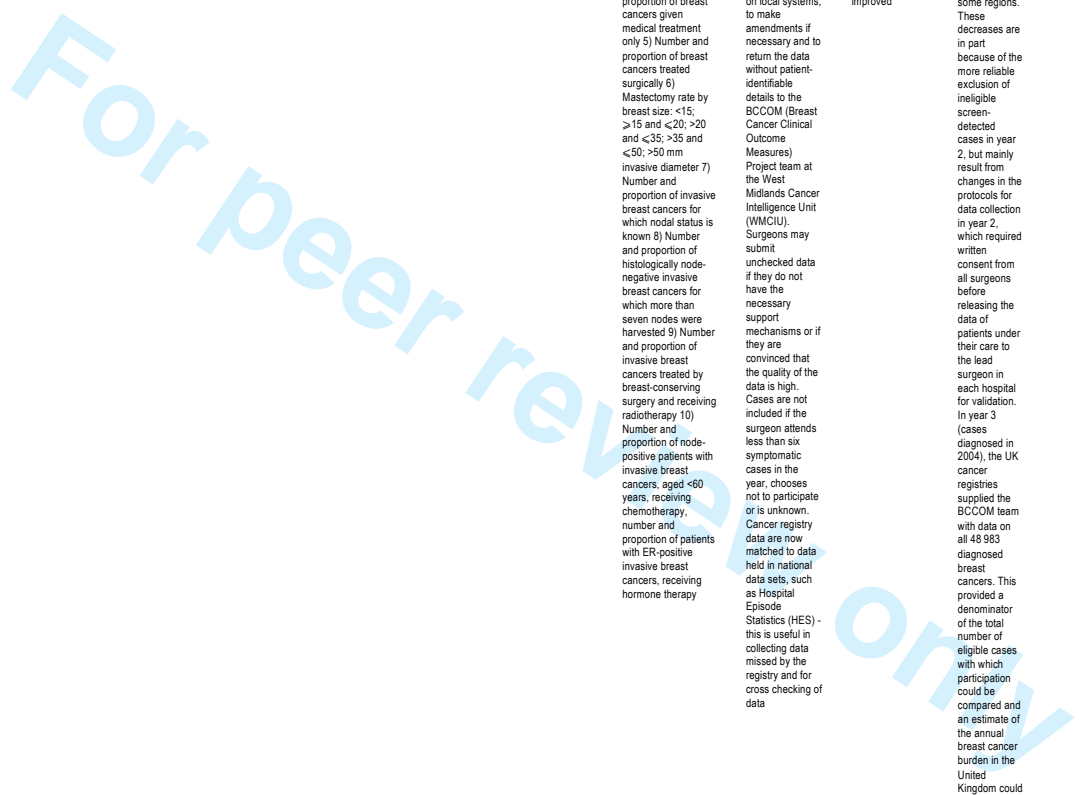



1  
2  
3  
4  
5  
6  
7  
8  
9  
10  
11  
12  
13  
14  
15  
16  
17  
18  
19  
20  
21  
22  
23  
24  
25  
26  
27  
28  
29  
30  
31  
32  
33  
34  
35  
36  
37  
38  
39  
40  
41  
42  
43  
44  
45  
46  
47

|             |                                                    |      |                                                                                                                                                                                 |                            |    |    |                                                                                                                                                                                                                                                                                                                                                                                                                                  |    |                                  |    |    |                                                                                                                                                                                                                                                                                                                                                                                                                                                                                                                                                                                                                                                                                                                                                                                                                                                                                                                                                                                                                                                                                                                                                                                                                                                       |                                                                                                                                                                                                                                                                                                                                                                                                                                                                                                                                                                                                                                                          |    |                                                                                                                                    |    |                                                                                                                                                                                                                          |                                                                                 |    |                                                                        |
|-------------|----------------------------------------------------|------|---------------------------------------------------------------------------------------------------------------------------------------------------------------------------------|----------------------------|----|----|----------------------------------------------------------------------------------------------------------------------------------------------------------------------------------------------------------------------------------------------------------------------------------------------------------------------------------------------------------------------------------------------------------------------------------|----|----------------------------------|----|----|-------------------------------------------------------------------------------------------------------------------------------------------------------------------------------------------------------------------------------------------------------------------------------------------------------------------------------------------------------------------------------------------------------------------------------------------------------------------------------------------------------------------------------------------------------------------------------------------------------------------------------------------------------------------------------------------------------------------------------------------------------------------------------------------------------------------------------------------------------------------------------------------------------------------------------------------------------------------------------------------------------------------------------------------------------------------------------------------------------------------------------------------------------------------------------------------------------------------------------------------------------|----------------------------------------------------------------------------------------------------------------------------------------------------------------------------------------------------------------------------------------------------------------------------------------------------------------------------------------------------------------------------------------------------------------------------------------------------------------------------------------------------------------------------------------------------------------------------------------------------------------------------------------------------------|----|------------------------------------------------------------------------------------------------------------------------------------|----|--------------------------------------------------------------------------------------------------------------------------------------------------------------------------------------------------------------------------|---------------------------------------------------------------------------------|----|------------------------------------------------------------------------|
| Clarke D.R. | Verification of data in congenital cardiac surgery | 2008 | This paper reviews 3 registries: The Society of Thoracic Surgeons, The European Association for Cardio-Thoracic Surgery, and The United Kingdom Central Cardiac Audit Database. | Congenital cardiac surgery | NS | NS | This paper reviews the current strategies used for verification of the data in the congenital databases of The Society of Thoracic Surgeons (america), The European Association for Cardio-Thoracic Surgery (europe), and The United Kingdom Central Cardiac Audit Database (UK). The Central Cardiac Audit Database aimed to provide national analyses of outcomes after cardiovascular surgery and therapeutic catheterization | NS | The UK registry is funded by DOH | NS | NS | For UK registry (The Central Cardiac Audit Database). Data are collected electronically in an anonymous encrypted format with prospective tracking of mortality and re-intervention using up to a 40 field minimum dataset. In the UK registry, the verification process begins at the congenital cardiac centre. Most of the 13 cardiac units in the United Kingdom have database managers who check for data accuracy with medical staff before the data is submitted. Independent validation of the patient's status (alive or dead) is achieved by central tracking using the linkage of each patient's National Health Service number to the Office of National Statistics, where the death of every resident in England and Wales is registered. Data verification audit site visits are very effective at drawing attention to the importance of high quality data. The visits can also provide "ammunition" for convincing institutional administration to commit appropriate resources to data management. In the UK registry, each unit is visited for one/two days each year by a specialist database nurse administrator from the Central Cardiac Audit Database and a volunteer surgeon or another unit. A detailed pre-visit profoma is | The audits can benefit participating centres by validating methods that are effective and by identifying ineffective practices and providing suggestions for improvement. Public interest in medical outcomes is at an all time high and increasing focus on "pay for performance". The need for accurate, complete and high quality Congenital Heart Surgery outcome data has never been more pressing. For the UK registry (Central Cardiac Audit Database), data submission is compulsory for all centres undertaking congenital cardiac disease surgery. External monitoring of performance gives an incentive to provide accurate and complete data | NS | For the UK registry centre specific results are now published on the World Wide Web allowing free access to families and the media | NS | For the UK registry: ideally, every medical record of the approximately 8,000 patients undergoing procedures each year should be examined. However, there is a lack of funding and skilled manpower for such an activity | Patients included in medical audit have better outcomes than those not included | NS | In the UK registry, patients give informed consent for data submission |
|-------------|----------------------------------------------------|------|---------------------------------------------------------------------------------------------------------------------------------------------------------------------------------|----------------------------|----|----|----------------------------------------------------------------------------------------------------------------------------------------------------------------------------------------------------------------------------------------------------------------------------------------------------------------------------------------------------------------------------------------------------------------------------------|----|----------------------------------|----|----|-------------------------------------------------------------------------------------------------------------------------------------------------------------------------------------------------------------------------------------------------------------------------------------------------------------------------------------------------------------------------------------------------------------------------------------------------------------------------------------------------------------------------------------------------------------------------------------------------------------------------------------------------------------------------------------------------------------------------------------------------------------------------------------------------------------------------------------------------------------------------------------------------------------------------------------------------------------------------------------------------------------------------------------------------------------------------------------------------------------------------------------------------------------------------------------------------------------------------------------------------------|----------------------------------------------------------------------------------------------------------------------------------------------------------------------------------------------------------------------------------------------------------------------------------------------------------------------------------------------------------------------------------------------------------------------------------------------------------------------------------------------------------------------------------------------------------------------------------------------------------------------------------------------------------|----|------------------------------------------------------------------------------------------------------------------------------------|----|--------------------------------------------------------------------------------------------------------------------------------------------------------------------------------------------------------------------------|---------------------------------------------------------------------------------|----|------------------------------------------------------------------------|

For peer review only

completed by each centre covering such areas as security and confidentiality, in-house verification and quality assurance, training for data collection and accuracy, communication issues, accountability, health records management, and timeliness of central submission. The visits are scheduled in the year following data submission. At the visit, all operating room and catheter laboratory logbooks are scrutinized to ensure procedural data accuracy and that all procedures have been captured. Also, a random selection of 20 patient hospital records is requested in advance and compared to the dataset submitted for missing or incorrect data. A Data Quality Indicator score is then calculated. The results have been encouraging with the scores improving over time from an average of 79% to 91% currently (range 81–98%). At the end of the visit, the unit clinicians meet with the auditors to discuss areas of excellence and deficiencies. Within weeks, a formal report is submitted back to the hospital team and to higher management. The visits are therefore seen by the congenital cardiac clinicians as very positive encounters. A combination of site visits to verify the data at the primary source of the data, and external verification of the data from independent databases or registries, such as governmental death registries, may be required to allow for optimal verification of data. It is important to verify the completeness and accuracy of data in congenital cardiac registries in the United Kingdom Central Cardiac Audit

For peer review only

1  
2  
3  
4  
5  
6  
7  
8  
9  
10  
11  
12  
13  
14  
15  
16  
17  
18  
19  
20  
21  
22  
23  
24  
25  
26  
27  
28  
29  
30  
31  
32  
33  
34  
35  
36  
37  
38  
39  
40  
41  
42  
43  
44  
45  
46  
47

Database reveals that hospital databases under-reported 42 operative deaths out of a total of 194 (21.6%). Similarly, the European Association for Cardio-Thoracic Surgery implemented a data verification process and discovered that 7 hospital deaths out of 68 (10.3%) were not reported.

1  
2  
3  
4  
5  
6  
7  
8  
9  
10  
11  
12  
13  
14  
15  
16  
17  
18  
19  
20  
21  
22  
23  
24  
25  
26  
27  
28  
29  
30  
31  
32  
33  
34  
35  
36  
37  
38  
39  
40  
41  
42  
43  
44  
45  
46  
47

For peer review only

|             |                                                                                                                                                     |      |                                     |                            |                                                                                                                                                                                         |                                               |                                                                                                                                                                                                                                                                                                                                                                                                                                                                                                                                                                                                                                                               |                                                                                                                                                                                                                                                   |                                                                           |                                                                                                                                                                                                                                                                                                                                                                                                                                                                                                                                                     |                                                                                                                                                                                                                                                                                                                                   |                                                                                                                                                                                                                                                                                                                                                                                                                                                                                                                                                                                           |                                                                                                                                                                                                                                                                                                                                                          |                                                                                                                                 |                                                                                                                                                                                                                                                                                                                                                                                                                                                                                                                                                                                                                                                                                                                                                                                                                                                                                                                                                                                                                                                                                                                                                                                                                                                                                                                                                                                                                                                                                                                                                   |    |    |                                                                                                                                                                                                                                                                                                                                                                                                                                                                                                                                                                                           |                                                                                                                                                                                                                                                                                                                                                                                                                                                                                                                                                                                                                                                                                                                                                                                                                                                                                                                                                                                                                                                       |
|-------------|-----------------------------------------------------------------------------------------------------------------------------------------------------|------|-------------------------------------|----------------------------|-----------------------------------------------------------------------------------------------------------------------------------------------------------------------------------------|-----------------------------------------------|---------------------------------------------------------------------------------------------------------------------------------------------------------------------------------------------------------------------------------------------------------------------------------------------------------------------------------------------------------------------------------------------------------------------------------------------------------------------------------------------------------------------------------------------------------------------------------------------------------------------------------------------------------------|---------------------------------------------------------------------------------------------------------------------------------------------------------------------------------------------------------------------------------------------------|---------------------------------------------------------------------------|-----------------------------------------------------------------------------------------------------------------------------------------------------------------------------------------------------------------------------------------------------------------------------------------------------------------------------------------------------------------------------------------------------------------------------------------------------------------------------------------------------------------------------------------------------|-----------------------------------------------------------------------------------------------------------------------------------------------------------------------------------------------------------------------------------------------------------------------------------------------------------------------------------|-------------------------------------------------------------------------------------------------------------------------------------------------------------------------------------------------------------------------------------------------------------------------------------------------------------------------------------------------------------------------------------------------------------------------------------------------------------------------------------------------------------------------------------------------------------------------------------------|----------------------------------------------------------------------------------------------------------------------------------------------------------------------------------------------------------------------------------------------------------------------------------------------------------------------------------------------------------|---------------------------------------------------------------------------------------------------------------------------------|---------------------------------------------------------------------------------------------------------------------------------------------------------------------------------------------------------------------------------------------------------------------------------------------------------------------------------------------------------------------------------------------------------------------------------------------------------------------------------------------------------------------------------------------------------------------------------------------------------------------------------------------------------------------------------------------------------------------------------------------------------------------------------------------------------------------------------------------------------------------------------------------------------------------------------------------------------------------------------------------------------------------------------------------------------------------------------------------------------------------------------------------------------------------------------------------------------------------------------------------------------------------------------------------------------------------------------------------------------------------------------------------------------------------------------------------------------------------------------------------------------------------------------------------------|----|----|-------------------------------------------------------------------------------------------------------------------------------------------------------------------------------------------------------------------------------------------------------------------------------------------------------------------------------------------------------------------------------------------------------------------------------------------------------------------------------------------------------------------------------------------------------------------------------------------|-------------------------------------------------------------------------------------------------------------------------------------------------------------------------------------------------------------------------------------------------------------------------------------------------------------------------------------------------------------------------------------------------------------------------------------------------------------------------------------------------------------------------------------------------------------------------------------------------------------------------------------------------------------------------------------------------------------------------------------------------------------------------------------------------------------------------------------------------------------------------------------------------------------------------------------------------------------------------------------------------------------------------------------------------------|
| Jacobs M.L. | Databases for assessing the outcomes of the treatment of patients with congenital and paediatric cardiac disease—the perspective of cardiac surgery | 2008 | Central Cardiac Audit Database (UK) | Congenital cardiac surgery | The Central cardiac audit database was formed in collaboration with the British Cardiac Society, the Society of Cardiothoracic Surgeons, and the British Paediatric Cardiac Association | Respective society of the surgical speciality | This review discusses the rationale for the creation and maintenance of multi-institutional databases for congenital heart surgery, together with a history of the evolution of such databases. This review also describes several European and North American databases for pediatric and congenital cardiac surgery as well as the UK Central Cardiac Audit Database. We have collected data on general learning points and specific information on the UK Central Cardiac Audit Database. The UK Central Cardiac Audit Database monitors surgical and transcatheter cardiovascular interventions undertaken on patients with congenitally malformed hearts | The development of the Central Cardiac Audit Database involved the establishment of a team of experts to set up the computerised registry with robust protocols for the protection and validation of data. Electronic data collection (encrypted) | For the Central Cardiac Audit Database, funding is centrally from the DOH | International Congenital Heart Surgery Nomenclature and Database Project in September 1998. This led to the publication of a common nomenclature and a common core minimal data set that were enthusiastically accepted by the majority of cardiac databases/societies worldwide. While it is useful to collect data on mortality, fortunately most patients do not die - it is therefore very important to collect data on morbidity. The resource utilisation, QOL. A common clinical language (nomenclature) is fundamental for registry success | Demographics, risk factors, co-morbidity, diagnosis, procedure, mortality, complications, length of stay, time to extubation, and utilization of resources. For the Central Cardiac Audit Database, there were initially 20 data fields. After 2 years there was a gradual expansion of the fields - now there are 40 data fields | Independent validation of the status of the patient as alive or dead is achieved by central mortality tracking using the linkage of the National Health Service number of the patient to the Office of National Statistics. For Central Cardiac Audit Database annual visits for the validation of data are undertaken to each hospital submitting data to ensure accuracy of the data and that all procedures undertaken have been captured. These visits also help identify how to improve database management. Whilst site visits are expensive and time consuming, they are essential | For the Central Cardiac Audit Database, there were local "audit facilitators" that encouraged clinicians to enter data and to validate the quality of data before submission. For the Central Cardiac Audit Database, it is compulsory for all centres carrying out interventions on patients with congenital cardiac malformations to submit their data | For Central Cardiac Audit Database, over 26,000 surgical procedures have been amassed at a current rate of over 4,500 each year | Annually, the committee responsible for the database of each Society issues to each participating institution a report consisting of aggregate data from all participating groups and institutions, de-identified with respect to source, and of data specific to the participant. Each institution receives a report of outcomes encompassing all of their annual activity, as well as cumulative activity over the years of participation. Each participant is therefore able to identify trends in their own practice, including outcomes such as mortality, complications, length of stay, and utilization of resources. For the Central Cardiac Audit Database (UK), underperforming units would receive constructive feedback, which focused, for example, on surgical techniques, intensive care support, or shortcomings in the 'system' or infrastructure. For the Central Cardiac Audit Database, results have been published on the web, with free access to families and the media providing details of outcomes after major surgical procedures and transcatheter procedures. It is important to reduce the time between the actual clinical event (the operation) and the release of the data. Important to realise that outcomes of extremely complex cases are likely to be less favourable than those of cases of lesser complexity. The recognition of this problem led to the development of a system to stratify operative procedures for congenital cardiac diseases in terms of complexity. The system adjusts for baseline | NS | NS | Events such as the Bristol Royal Infirmary have informed us that we need registry databases to facilitate programs of quality assessment and quality improvement. Furthermore, such events including the sometimes misleading reporting of data of uncertain quality, emphasise the importance of clinicians, with their professional societies to take the responsibility of data analysis and reporting. Enables sharing of data and comparing trends in their own practice, including institutions and countries. This helps define areas of weakness to enable continuous improvement | Registry Databases are distinguished in principle from "Research Databases" in that they are designed to catalogue essential information, in less voluminous detail per patient than is practical in a research database, but with the goal of having the information on all patients. Registry data must be timely, freely available with good degree of data capture. It should contribute to education, research, the allocation of resources, the analysis of outcomes, and the improvement of quality. A successful registry is one in which the data are complete. There are five fundamental elements that are essential to success in a multi-institutional registry database: 1) a common language or nomenclature, acceptable and familiar to all participants. 2) an established uniform core dataset. 3) a mechanism of evaluating the complexity of the operations. 4) a mechanism to ensure and verify the completeness and accuracy of the data. 5) a platform that enables collaboration between medical and surgical subspecialties. |
|-------------|-----------------------------------------------------------------------------------------------------------------------------------------------------|------|-------------------------------------|----------------------------|-----------------------------------------------------------------------------------------------------------------------------------------------------------------------------------------|-----------------------------------------------|---------------------------------------------------------------------------------------------------------------------------------------------------------------------------------------------------------------------------------------------------------------------------------------------------------------------------------------------------------------------------------------------------------------------------------------------------------------------------------------------------------------------------------------------------------------------------------------------------------------------------------------------------------------|---------------------------------------------------------------------------------------------------------------------------------------------------------------------------------------------------------------------------------------------------|---------------------------------------------------------------------------|-----------------------------------------------------------------------------------------------------------------------------------------------------------------------------------------------------------------------------------------------------------------------------------------------------------------------------------------------------------------------------------------------------------------------------------------------------------------------------------------------------------------------------------------------------|-----------------------------------------------------------------------------------------------------------------------------------------------------------------------------------------------------------------------------------------------------------------------------------------------------------------------------------|-------------------------------------------------------------------------------------------------------------------------------------------------------------------------------------------------------------------------------------------------------------------------------------------------------------------------------------------------------------------------------------------------------------------------------------------------------------------------------------------------------------------------------------------------------------------------------------------|----------------------------------------------------------------------------------------------------------------------------------------------------------------------------------------------------------------------------------------------------------------------------------------------------------------------------------------------------------|---------------------------------------------------------------------------------------------------------------------------------|---------------------------------------------------------------------------------------------------------------------------------------------------------------------------------------------------------------------------------------------------------------------------------------------------------------------------------------------------------------------------------------------------------------------------------------------------------------------------------------------------------------------------------------------------------------------------------------------------------------------------------------------------------------------------------------------------------------------------------------------------------------------------------------------------------------------------------------------------------------------------------------------------------------------------------------------------------------------------------------------------------------------------------------------------------------------------------------------------------------------------------------------------------------------------------------------------------------------------------------------------------------------------------------------------------------------------------------------------------------------------------------------------------------------------------------------------------------------------------------------------------------------------------------------------|----|----|-------------------------------------------------------------------------------------------------------------------------------------------------------------------------------------------------------------------------------------------------------------------------------------------------------------------------------------------------------------------------------------------------------------------------------------------------------------------------------------------------------------------------------------------------------------------------------------------|-------------------------------------------------------------------------------------------------------------------------------------------------------------------------------------------------------------------------------------------------------------------------------------------------------------------------------------------------------------------------------------------------------------------------------------------------------------------------------------------------------------------------------------------------------------------------------------------------------------------------------------------------------------------------------------------------------------------------------------------------------------------------------------------------------------------------------------------------------------------------------------------------------------------------------------------------------------------------------------------------------------------------------------------------------|

For Peer Review Only

1  
2  
3  
4  
5  
6  
7  
8  
9  
10  
11  
12  
13  
14  
15  
16  
17  
18  
19  
20  
21  
22  
23  
24  
25  
26  
27  
28  
29  
30  
31  
32  
33  
34  
35  
36  
37  
38  
39  
40  
41  
42  
43  
44  
45  
46  
47

case-mix differences when comparing discharge mortality. The system was created using a combination of judgment-based and empirical methodology with a panel of paediatric cardiologists and cardiac surgeons.

For peer review only

1  
2  
3  
4  
5  
6  
7  
8  
9  
10  
11  
12  
13  
14  
15  
16  
17  
18  
19  
20  
21  
22  
23  
24  
25  
26  
27  
28  
29  
30  
31  
32  
33  
34  
35  
36  
37  
38  
39  
40  
41  
42  
43  
44  
45  
46  
47

|    |              |                                                                                                                                        |      |                                                            |                           |    |                                                                                                         |                                                          |                                                        |                                                                                                                                             |    |                                                                                                                                                                                                                                                                                                                                                                                                                          |                                                                                                                                                                                  |                                                                                                                                                                                                                          |                                                                                                                                                                                            |    |    |                                                                                                                                                                                         |                                                |    |                                     |
|----|--------------|----------------------------------------------------------------------------------------------------------------------------------------|------|------------------------------------------------------------|---------------------------|----|---------------------------------------------------------------------------------------------------------|----------------------------------------------------------|--------------------------------------------------------|---------------------------------------------------------------------------------------------------------------------------------------------|----|--------------------------------------------------------------------------------------------------------------------------------------------------------------------------------------------------------------------------------------------------------------------------------------------------------------------------------------------------------------------------------------------------------------------------|----------------------------------------------------------------------------------------------------------------------------------------------------------------------------------|--------------------------------------------------------------------------------------------------------------------------------------------------------------------------------------------------------------------------|--------------------------------------------------------------------------------------------------------------------------------------------------------------------------------------------|----|----|-----------------------------------------------------------------------------------------------------------------------------------------------------------------------------------------|------------------------------------------------|----|-------------------------------------|
| 36 | Knights J.S. | National UK audit of procedure for prolapsing haemorrhoids on behalf of the Association of Coloproctology of Great Britain and Ireland | 2008 | National UK audit of procedure for prolapsing haemorrhoids | Stapled haemorrhoidectomy | NS | Research and Audit Committee of the Association of Coloproctology of Great Britain and Ireland (ACPGBI) | To collect prospective data on stapled haemorrhoidectomy | Electronic online database through the ACPGBI website. | Electronic database and online entry process were sponsored by Ethicon Endo-Surgery, but they had no input or access to the data collected. | NS | Data were collected on the grade and symptoms of haemorrhoids, the presence of any external component, previous treatment, grade of surgeon, type of anaesthetic, height of the staple line above the dentate line, length of hospital stay, immediate complications, pain on discharge and any problems encountered at 6-week follow-up. Data were collected on the presence of symptoms of haemorrhoids according to a | Following registration on the website, the surgeon obtained a secure personalised logon through which data were entered real time at the end of the case and at 6-week follow-up | Surgeons invited to enter data on the website. Reminders sent via email and through the Association's bulletins. This audit can form the basis of a future registry. Such a registry should be compulsory to submit data | 695 patients were entered onto the database by 61 UK surgeons (2005). Only 10% of the ACPGBI members contributed data. Data represents only 20% of the potential cases conducted in the UK | NS | NS | Short follow up of 6 weeks - not long enough to detect recurrence. Only 10% of the ACPGBI members contributed data. Data represents only 20% of the potential cases conducted in the UK | Provides a good reflection of current practice | NS | Personalised login for each surgeon |
|----|--------------|----------------------------------------------------------------------------------------------------------------------------------------|------|------------------------------------------------------------|---------------------------|----|---------------------------------------------------------------------------------------------------------|----------------------------------------------------------|--------------------------------------------------------|---------------------------------------------------------------------------------------------------------------------------------------------|----|--------------------------------------------------------------------------------------------------------------------------------------------------------------------------------------------------------------------------------------------------------------------------------------------------------------------------------------------------------------------------------------------------------------------------|----------------------------------------------------------------------------------------------------------------------------------------------------------------------------------|--------------------------------------------------------------------------------------------------------------------------------------------------------------------------------------------------------------------------|--------------------------------------------------------------------------------------------------------------------------------------------------------------------------------------------|----|----|-----------------------------------------------------------------------------------------------------------------------------------------------------------------------------------------|------------------------------------------------|----|-------------------------------------|





data may not be a true reflection of the number of shoulder arthroplasties performed in Scotland. This registry employs dedicated personnel for data collection, validation and ensuring compliance from the participating surgeons

meeting being cancelled

1  
2  
3  
4  
5  
6  
7  
8  
9  
10  
11  
12  
13  
14  
15  
16  
17  
18  
19  
20  
21  
22  
23  
24  
25  
26  
27  
28  
29  
30  
31  
32  
33  
34  
35  
36  
37  
38  
39  
40  
41  
42  
43  
44  
45  
46  
47

|                                                                 |                                                                                 |          |                                     |                        |                                                                                                                                                                                                                                           |                                                                                                           |                                                                                                                                          |                                                                                                                                                                                                                       |                                                                                                                                                                                                                       |                                                                                                                                                                                                                                                                                                                                                                                                                            |                                                |                                                                                                                                                                                              |                                                                                                                                                                                                                                                                                                                                                                                    |                                                                                                                                     |                                                                                                                                                     |    |    |                                                                                                                                                                                                                                                                                                                                                                                                                                                                                                   |    |                                                                                                                                                                                                                                                                                                                                                                                                                                                                                                                                                                                                                                                                                                                                                                                                            |
|-----------------------------------------------------------------|---------------------------------------------------------------------------------|----------|-------------------------------------|------------------------|-------------------------------------------------------------------------------------------------------------------------------------------------------------------------------------------------------------------------------------------|-----------------------------------------------------------------------------------------------------------|------------------------------------------------------------------------------------------------------------------------------------------|-----------------------------------------------------------------------------------------------------------------------------------------------------------------------------------------------------------------------|-----------------------------------------------------------------------------------------------------------------------------------------------------------------------------------------------------------------------|----------------------------------------------------------------------------------------------------------------------------------------------------------------------------------------------------------------------------------------------------------------------------------------------------------------------------------------------------------------------------------------------------------------------------|------------------------------------------------|----------------------------------------------------------------------------------------------------------------------------------------------------------------------------------------------|------------------------------------------------------------------------------------------------------------------------------------------------------------------------------------------------------------------------------------------------------------------------------------------------------------------------------------------------------------------------------------|-------------------------------------------------------------------------------------------------------------------------------------|-----------------------------------------------------------------------------------------------------------------------------------------------------|----|----|---------------------------------------------------------------------------------------------------------------------------------------------------------------------------------------------------------------------------------------------------------------------------------------------------------------------------------------------------------------------------------------------------------------------------------------------------------------------------------------------------|----|------------------------------------------------------------------------------------------------------------------------------------------------------------------------------------------------------------------------------------------------------------------------------------------------------------------------------------------------------------------------------------------------------------------------------------------------------------------------------------------------------------------------------------------------------------------------------------------------------------------------------------------------------------------------------------------------------------------------------------------------------------------------------------------------------------|
| Sher J.L.<br>Reed M.R.<br>Calvert P.<br>Wallace W.A.<br>Lamb A. | Influencing the national training agenda. The UK & Ireland orthopaedic eLogbook | 200<br>5 | UK and Ireland Orthopaedic eLogbook | Orthopaedic operations | British Orthopaedic Association (BOA) Education Committee, the Specialist Advisory Committee (SAC) in Trauma and Orthopaedics, the British Orthopaedic Trainees Association (BOTA) and the Royal College of Surgeons of Edinburgh (RCSEd) | Responsibility for the project has passed to the BOA eLogbook Validation & Authorisation Committee (eVAC) | To provide data on trainees operative experience and give an insight into their training operative experience in trauma and orthopaedics | Over several years a committed group of trainees and trainers tested several versions of the logbook leading to the current product. Current software was produced by the Faculty of Health Informatics at the RCSEd. | Funds were raised from the BOA (British orthopaedic association), the Editorial Board of the Journal of Bone and Joint Surgery, the Charnley Trust, the Wishbone Trust, Smith & Nephew, Johnson & Johnson and Biomet. | After much debate, a system was devised to encompass the information needed by the United Kingdom and Irish SAC. Users can submit suggestions for unlisted procedures, which once ratified by the eVAC committee (eLogbook Validation & Authorisation Committee (eVAC), appear seamlessly as the users' 'Synchronisation' button is next pressed. The great majority of users' suggestions have been incorporated already. | Trainee level, level of involvement, operation | For data synchronisation, computers 'talk' to each other to check that their data is identical. If not, data is transferred by the main server at the Royal College of Surgeons of Edinburgh | By making the registry a 'thin' client application it means that no software has to be downloaded on to the users computer. Rather the software relies on a live internet connection. This is more advantageous when most people have internet connections. Making the logbook compatible with portable devices. It is compulsory for all specialist registrars to submit the data | Compliance is 92%. Although the database now includes over 500 000 operations, the 2004 data represents 157 492 uploaded operations | The eLogbook gives information on levels of supervision and training opportunities provided by specific trainers, hospitals and training programmes | NS | NS | The database gives information on the training opportunities available and levels of supervision. It also helps compare training posts. This helps gain an insight into the trainees experience over a given time period and compare this against the national average. Training opportunities offered by hospitals or trainers can also be compared with national figures. Such comparisons display not only total numbers of procedures but also identify unused potential learning experiences | NS | Because data which is defined as 'sensitive' or 'confidential' by the UK Data Protection Act is collected in the logbook, each user must register with the data protection authorities as a 'data controller'. The RCSEd server uses the same level of encryption security as bank web sites and the data is stored simultaneously on two servers which are regularly backed up off-site. Each user owns their data and collated information is administered by the eVAC committee. Access to the reports is restricted to defined users. Trainees have access to their own and pooled national comparative data. Training programme directors can examine a local individual's performance and individual trainers and hospitals. The SAC chairman has access to all regions and all training departments |
|-----------------------------------------------------------------|---------------------------------------------------------------------------------|----------|-------------------------------------|------------------------|-------------------------------------------------------------------------------------------------------------------------------------------------------------------------------------------------------------------------------------------|-----------------------------------------------------------------------------------------------------------|------------------------------------------------------------------------------------------------------------------------------------------|-----------------------------------------------------------------------------------------------------------------------------------------------------------------------------------------------------------------------|-----------------------------------------------------------------------------------------------------------------------------------------------------------------------------------------------------------------------|----------------------------------------------------------------------------------------------------------------------------------------------------------------------------------------------------------------------------------------------------------------------------------------------------------------------------------------------------------------------------------------------------------------------------|------------------------------------------------|----------------------------------------------------------------------------------------------------------------------------------------------------------------------------------------------|------------------------------------------------------------------------------------------------------------------------------------------------------------------------------------------------------------------------------------------------------------------------------------------------------------------------------------------------------------------------------------|-------------------------------------------------------------------------------------------------------------------------------------|-----------------------------------------------------------------------------------------------------------------------------------------------------|----|----|---------------------------------------------------------------------------------------------------------------------------------------------------------------------------------------------------------------------------------------------------------------------------------------------------------------------------------------------------------------------------------------------------------------------------------------------------------------------------------------------------|----|------------------------------------------------------------------------------------------------------------------------------------------------------------------------------------------------------------------------------------------------------------------------------------------------------------------------------------------------------------------------------------------------------------------------------------------------------------------------------------------------------------------------------------------------------------------------------------------------------------------------------------------------------------------------------------------------------------------------------------------------------------------------------------------------------------|

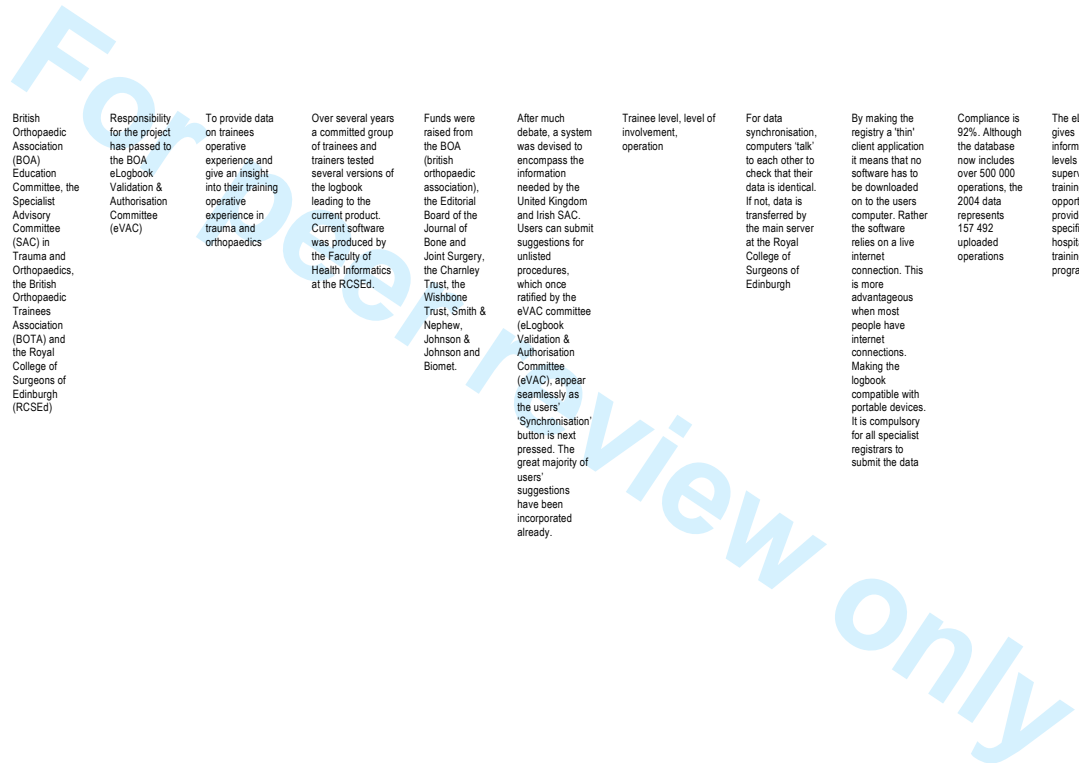

|             |                                                                                                                     |      |                                                                     |                               |    |    |                                                                                                                                                                                                                                                                           |    |                                                                                                                                                                                                         |                                                                                                                                                                                                      |                                                                                                                                                                                                                                                                                                                                                                                                                                                                          |                                                                                                |                                                                                                                                                                                                                                                                                                                                                                                                                                                                                                                                                                                                                                                       |    |                                                                                   |                                                                                                                                                                                                                                                                                                                                                                                                                                                                                                                                                                                                                                                                         |                                                                                                                                                                                                                                                                                                                                                                                                                                                                                                                                                                                                                     |                                                                                                                                                                                                                                        |                                                                                                                                                                                                                                                                    |    |    |
|-------------|---------------------------------------------------------------------------------------------------------------------|------|---------------------------------------------------------------------|-------------------------------|----|----|---------------------------------------------------------------------------------------------------------------------------------------------------------------------------------------------------------------------------------------------------------------------------|----|---------------------------------------------------------------------------------------------------------------------------------------------------------------------------------------------------------|------------------------------------------------------------------------------------------------------------------------------------------------------------------------------------------------------|--------------------------------------------------------------------------------------------------------------------------------------------------------------------------------------------------------------------------------------------------------------------------------------------------------------------------------------------------------------------------------------------------------------------------------------------------------------------------|------------------------------------------------------------------------------------------------|-------------------------------------------------------------------------------------------------------------------------------------------------------------------------------------------------------------------------------------------------------------------------------------------------------------------------------------------------------------------------------------------------------------------------------------------------------------------------------------------------------------------------------------------------------------------------------------------------------------------------------------------------------|----|-----------------------------------------------------------------------------------|-------------------------------------------------------------------------------------------------------------------------------------------------------------------------------------------------------------------------------------------------------------------------------------------------------------------------------------------------------------------------------------------------------------------------------------------------------------------------------------------------------------------------------------------------------------------------------------------------------------------------------------------------------------------------|---------------------------------------------------------------------------------------------------------------------------------------------------------------------------------------------------------------------------------------------------------------------------------------------------------------------------------------------------------------------------------------------------------------------------------------------------------------------------------------------------------------------------------------------------------------------------------------------------------------------|----------------------------------------------------------------------------------------------------------------------------------------------------------------------------------------------------------------------------------------|--------------------------------------------------------------------------------------------------------------------------------------------------------------------------------------------------------------------------------------------------------------------|----|----|
| Thomas S.M. | Results from the prospective Registry of Endovascular Treatment of Aneurysms (RETA). Mid term results to five years | 2005 | Registry for Endovascular Treatment of Aneurysms (RETA)             | Endovascular aneurysm repairs | NS | NS | To collect long-term data for endovascular aneurysm repairs in the UK                                                                                                                                                                                                     | NS | Financial support has been provided by the BSIR and VSGBI and by the following device companies. BARD UK Ltd, WL Gore (UK) Ltd, Medtronic Ltd, Cook (UK) Ltd and Boston Scientific Ltd, and Cordis (UK) | Demographics, ASA grade, stent graft type, fitness for surgery, aneurysm diameter, contraindications, indication for surgery, type of anaesthetic, complication rate, mortality rate, length of stay | A simple one-page follow-up form was sent out to the each centre on an annual basis, this follow up data could be returned by post, fax or via e-mail. Original submission of data was voluntary, and return of follow up data was dependent on the submitting centre in the majority of cases. Centres that failed to return forms were sent a further form, followed by a telephone reminder. The returned follow up data was manually entered into an Access database | Centres that failed to return forms were sent a further form, followed by a telephone reminder | Since its inception in 1996 a total of 1823 cases have been submitted to the Registry. One thousand cases were submitted to the Registry from 41 centres between 1st January 1996 and March 3rd 2000. The number of centres and cases increased each year until the EVAR trial began. Despite the best efforts of the Registry co-ordinator voluntary data submission resulted in returns rates for requested follow up data of 87% at 1 year and 77, 65, 52 and 51% at 2, 3, 4 and 5 years, respectively. Despite the best efforts of the Registry co-ordinator the returns rates we present in this paper fell from 87% at 1 year to 51% at 5 years | NS | NS                                                                                | The database was voluntary which resulted in reduced data completion. It is very difficult to ensure data is submitted. Data submission to registries is usually voluntary which risks bias in the data submitted. Furthermore follow-up data becomes increasingly difficult to obtain. Despite the best efforts of the Registry co-ordinator the returns rates we present in this paper fell from 87% at 1 year to 51% at 5 years. If a large amount of data is submitted it is likely to be representative of practice at the time it is collected, but the results presented can only ever represent the best estimates within the limitations of the data collected | Registries can be of value in the assessment of new treatments. Regulatory organisations such as the UK National Institute for Clinical Excellence (NICE) will often accept that, in the absence of formal trials, registries can act as a means of assessment of new treatments or technologies. Registry data can provide useful insight into the results of new treatments, and can be used in planning trials and to generate hypotheses to be tested. The collection and analysis of data from registries should facilitate the early identification, quantification and correction of device-related problems | NS                                                                                                                                                                                                                                     | NS                                                                                                                                                                                                                                                                 |    |    |
| Wyatt M.G.  | Registries versus trials for the evaluation of the Endovascular Treatment of Abdominal Aortic Aneurysms             | 2005 | RETA registry (UK registry for Endovascular Treatment of Aneurysms) | Endovascular aneurysm repairs | NS | NS | This is a commentary discussing registries versus trials for the evaluation of endovascular aneurysm repairs. It also describes the RETA registry (UK registry for Endovascular Treatment of Aneurysms). Aim of RETA Registry was to audit EVAR deployments within the UK | NS | NS                                                                                                                                                                                                      | NS                                                                                                                                                                                                   | NS                                                                                                                                                                                                                                                                                                                                                                                                                                                                       | NS                                                                                             | NS                                                                                                                                                                                                                                                                                                                                                                                                                                                                                                                                                                                                                                                    | NS | RETA registry contains both retrospective and prospective data on 1823 procedures | RETA registry annual audit reports are produced on behalf of the Vascular Society of Great Britain and Ireland and the British Society of Interventional Radiology                                                                                                                                                                                                                                                                                                                                                                                                                                                                                                      | NS                                                                                                                                                                                                                                                                                                                                                                                                                                                                                                                                                                                                                  | Registry data is often incomplete and may present a biased view of the overall performance of new technologies. The RETA registry suffers in that it is voluntary and audited in an 'open' fashion, possibly leading to selection bias | Registries can be used to help RCT design. Data from the RETA registry was used in the design of the UK EVAR trials and as an audit tool to assess centres for trial entry. RETA registry has been an invaluable source of data on the performance of EVAR devices | NS | NS |

For peer review only

|                |                                               |      |                                    |                        |    |    |    |                                                                                                                       |    |                                                                                                                                                 |    |                                        |    |                                                                                                                                                                                                                                                    |                                                                                                                                                                                                                                                                     |                                                                                                                                                                          |    |                                                                                                                                                                                                                                                        |                                                                                                                                                                                                                                                                                                                             |                                                                                                                                                                                                                                                                         |                                                                                                                                                                                                                                                                                                                                                                                                                                                                                                                                                                                                                                                                                                                                                                                                                                                                                                                                                                                                                                                                                                                           |
|----------------|-----------------------------------------------|------|------------------------------------|------------------------|----|----|----|-----------------------------------------------------------------------------------------------------------------------|----|-------------------------------------------------------------------------------------------------------------------------------------------------|----|----------------------------------------|----|----------------------------------------------------------------------------------------------------------------------------------------------------------------------------------------------------------------------------------------------------|---------------------------------------------------------------------------------------------------------------------------------------------------------------------------------------------------------------------------------------------------------------------|--------------------------------------------------------------------------------------------------------------------------------------------------------------------------|----|--------------------------------------------------------------------------------------------------------------------------------------------------------------------------------------------------------------------------------------------------------|-----------------------------------------------------------------------------------------------------------------------------------------------------------------------------------------------------------------------------------------------------------------------------------------------------------------------------|-------------------------------------------------------------------------------------------------------------------------------------------------------------------------------------------------------------------------------------------------------------------------|---------------------------------------------------------------------------------------------------------------------------------------------------------------------------------------------------------------------------------------------------------------------------------------------------------------------------------------------------------------------------------------------------------------------------------------------------------------------------------------------------------------------------------------------------------------------------------------------------------------------------------------------------------------------------------------------------------------------------------------------------------------------------------------------------------------------------------------------------------------------------------------------------------------------------------------------------------------------------------------------------------------------------------------------------------------------------------------------------------------------------|
| Whitworth I.H. | The UK breast implant registry - Ten years on | 2005 | UK Breast Implant Registry (UKBIR) | Breast implant surgery | NS | NS | NS | The initial aim of the Registry was to record the use in the UK of all types of breast implant on a prospective basis | NS | MHRA. It is essential to have long-term funding as data will need to be collected for many years (lifetime expectation of implants is 37 years) | NS | Demographics, indication, implant type | NS | Directories of hospitals with theatre facilities were used to target individual units who might, or might not, be undertaking breast implant procedures. Contacts at responding centres were made, registration forms were prepared and circulated | Since 1993, the number of recorded procedures has risen steadily to reach a peak of approximately 14,000 in the year 2001. UKBIR now has some 80,000 patients registered as having undergone breast implant procedures. This involves in excess of 140,000 implants | Annual reports have been issued for each year of operation. Research projects using the data are being conducted which will help assess implant performance and lifespan | NS | In 2002 the registry started a new registration form in order to gain formal consent from patients regarding their data collection. This registration procedure has made the data collection process more complex resulting in a drop in registrations | UKBIR data can be used to audit process and can provide feedback data to individual centres for audit or information purposes. This registry can be a useful source of knowledge for tracing purposes in any advice on patient safety. The registry will help provide evaluation on breast implant performance and lifetime | The main purpose of a device registry is to describe the performance of implants in the broadest general sense, particularly assisting in the regulatory and safety aspects of implant use. Essential for registry to have good compliance amongst contributing centres | Since its foundation, the Registry has been guided by the Data Protection Act (1984, 1998), the Caldicott confidentiality principles, and guidance published by the General Medical Council (GMC). Upto 2002 there was no formal consent recorded from patients to record their data. Clinicians were asked to ensure that patients knew and agreed that registration would be made but, if a formal note was made, this was only to be found in the patient's notes. Although the Data Protection Act does not require explicit, written consent for personal data to be held, from 2002 the registry started to acquire formal consent from patients over registration and participation in research projects. Registration was with the Data Protection Registrar and confidentiality terms were defined. Individuals registered on the database have a right to all information recorded about them, but the Data Protection registration prevents disclosure of identifying information to a third party - this protects the interests of individuals registered but does allow the development of research projects |
|----------------|-----------------------------------------------|------|------------------------------------|------------------------|----|----|----|-----------------------------------------------------------------------------------------------------------------------|----|-------------------------------------------------------------------------------------------------------------------------------------------------|----|----------------------------------------|----|----------------------------------------------------------------------------------------------------------------------------------------------------------------------------------------------------------------------------------------------------|---------------------------------------------------------------------------------------------------------------------------------------------------------------------------------------------------------------------------------------------------------------------|--------------------------------------------------------------------------------------------------------------------------------------------------------------------------|----|--------------------------------------------------------------------------------------------------------------------------------------------------------------------------------------------------------------------------------------------------------|-----------------------------------------------------------------------------------------------------------------------------------------------------------------------------------------------------------------------------------------------------------------------------------------------------------------------------|-------------------------------------------------------------------------------------------------------------------------------------------------------------------------------------------------------------------------------------------------------------------------|---------------------------------------------------------------------------------------------------------------------------------------------------------------------------------------------------------------------------------------------------------------------------------------------------------------------------------------------------------------------------------------------------------------------------------------------------------------------------------------------------------------------------------------------------------------------------------------------------------------------------------------------------------------------------------------------------------------------------------------------------------------------------------------------------------------------------------------------------------------------------------------------------------------------------------------------------------------------------------------------------------------------------------------------------------------------------------------------------------------------------|

For peer review only

- 1
- 2
- 3
- 4
- 5
- 6
- 7
- 8
- 9
- 10
- 11
- 12
- 13
- 14
- 15
- 16
- 17
- 18
- 19
- 20
- 21
- 22
- 23
- 24
- 25
- 26
- 27
- 28
- 29
- 30
- 31
- 32
- 33
- 34
- 35
- 36
- 37
- 38
- 39
- 40
- 41
- 42
- 43
- 44
- 45
- 46
- 47



a reliance on the discharge process may itself be a weakness as there is an inevitable error rate within these documents. There is a risk of reporting bias and gaming when clinicians report their own outcomes - for example, adverse events become 'missing data'. To reduce this risk a possible solution is to have a unique patient identifier that follows the patient throughout the healthcare pathway so no events are missed. Data should be collected from a clearly defined point of care eg point of intervention - This single approach will help attain accurate clinical and administrative performance

1  
2  
3  
4  
5  
6  
7  
8  
9  
10  
11  
12  
13  
14  
15  
16  
17  
18  
19  
20  
21  
22  
23  
24  
25  
26  
27  
28  
29  
30  
31  
32  
33  
34  
35  
36  
37  
38  
39  
40  
41  
42  
43  
44  
45  
46  
47

For peer review only

|                      |                                                                                                                                                                                         |          |                                                                                                          |                                      |                                                                 |                                                                 |                                                                                                                                                                                                      |                                                                                                                                                                                                                                                                                   |       |                                                                                                                                                                                                                                                     |                                                                                                                                                                                      |                                                                                                                                                                                                            |                                                                                                                                                                                                 |                                                                                                                                                                                                       |                                                             |                                                                                                                                                                               |                   |                                                                                                                                                                                                                                                                                      |                                                                                                                                                                                                                                                                                                                                                                                                                                                                                                                                                                                                                                                                                                                                                                                                        |                                                                                              |    |
|----------------------|-----------------------------------------------------------------------------------------------------------------------------------------------------------------------------------------|----------|----------------------------------------------------------------------------------------------------------|--------------------------------------|-----------------------------------------------------------------|-----------------------------------------------------------------|------------------------------------------------------------------------------------------------------------------------------------------------------------------------------------------------------|-----------------------------------------------------------------------------------------------------------------------------------------------------------------------------------------------------------------------------------------------------------------------------------|-------|-----------------------------------------------------------------------------------------------------------------------------------------------------------------------------------------------------------------------------------------------------|--------------------------------------------------------------------------------------------------------------------------------------------------------------------------------------|------------------------------------------------------------------------------------------------------------------------------------------------------------------------------------------------------------|-------------------------------------------------------------------------------------------------------------------------------------------------------------------------------------------------|-------------------------------------------------------------------------------------------------------------------------------------------------------------------------------------------------------|-------------------------------------------------------------|-------------------------------------------------------------------------------------------------------------------------------------------------------------------------------|-------------------|--------------------------------------------------------------------------------------------------------------------------------------------------------------------------------------------------------------------------------------------------------------------------------------|--------------------------------------------------------------------------------------------------------------------------------------------------------------------------------------------------------------------------------------------------------------------------------------------------------------------------------------------------------------------------------------------------------------------------------------------------------------------------------------------------------------------------------------------------------------------------------------------------------------------------------------------------------------------------------------------------------------------------------------------------------------------------------------------------------|----------------------------------------------------------------------------------------------|----|
| Briggs V<br>Wilkie M | Chapter 14<br>Comparative<br>audit of peritoneal<br>dialysis catheter<br>placement in<br>England,<br>Northern Ireland<br>and Wales in<br>2011: a summary<br>of progress to<br>July 2012 | 201<br>2 | Audit of<br>Peritoneal<br>Dialysis Catheter<br>Placement in<br>England,<br>Northern Ireland<br>and Wales | PD Dialysis<br>Catheter<br>placement | York and<br>Humber Renal<br>Network and<br>UK Renal<br>Registry | York and<br>Humber Renal<br>Network and<br>UK Renal<br>Registry | The ultimate aim<br>of the project is<br>to develop an<br>effective national<br>PD access audit<br>which will identify<br>what represents<br>an 'appropriate<br>standard' of PD<br>catheter function | A 2009 Renal<br>Association<br>working party<br>recommended that<br>the UK Renal<br>Registry should<br>collect centre<br>specific<br>information on<br>various PD access<br>outcome<br>measures<br>including catheter<br>functional-<br>ity and<br>post-insertion<br>complication | HQUIP | The principal<br>data fields have<br>been refined<br>following a pilot<br>audit of six<br>centres in Y & H<br>and discussed<br>extensively<br>through the Y &<br>H PD audit group<br>and the Dialysis<br>Study Group of<br>the UK Renal<br>Registry | Demographics, date<br>of first dialysis, date<br>of surgical<br>assessment ,<br>peritoneal dialysis<br>catheter insertion<br>procedure details,<br>diabetes status,<br>complications | The brief<br>permitted a<br>spreadsheet<br>based data<br>collection<br>process for the<br>first year, with<br>subsequent data<br>collection<br>through the<br>Renal Registry's<br>electronic<br>processes. | It was realised<br>that there was a<br>need to minimise<br>the data to<br>strengthen data<br>completeness<br>including clinically relevant<br>data and<br>objective<br>reproducible<br>measures | Forty three<br>data collection<br>spreadsheets<br>were returned<br>from a total of<br>63 centres<br>describing 863<br>PD catheter<br>placements of<br>which 225 had<br>a missing date<br>of insertion | Electronic<br>reports via the<br>Renal registry<br>website. | Patient and<br>public<br>partnership<br>were engaged<br>at several<br>levels<br>including as<br>part of the<br>audit steering<br>group and UK<br>Renal Registry<br>Committee. | Data completeness | NS                                                                                                                                                                                                                                                                                   | NS                                                                                                                                                                                                                                                                                                                                                                                                                                                                                                                                                                                                                                                                                                                                                                                                     | Data protection<br>and patient<br>confidentiality<br>held within the<br>UK Renal<br>Registry |    |
| Mitchell D<br>Lees T | The benefits of<br>comparative audit<br>in vascular<br>surgery.                                                                                                                         | 201<br>1 | This is a<br>commentary on<br>the benefits of<br>comparative audit<br>in Vascular<br>Surgery             | Vascular Surgery                     | NS                                                              | NS                                                              | NS                                                                                                                                                                                                   | NS                                                                                                                                                                                                                                                                                | NS    | NS                                                                                                                                                                                                                                                  | NS                                                                                                                                                                                   | NS                                                                                                                                                                                                         | NS                                                                                                                                                                                              | NS                                                                                                                                                                                                    | NS                                                          | NS                                                                                                                                                                            | NS                | There is evidence<br>from examination of<br>national statistics that<br>registry data contains<br>bias due to under-<br>reporting of adverse<br>outcomes. The<br>majority of national<br>audits are collected by<br>clinicians on a<br>voluntary basis. This<br>lends itself to bias | The 2008<br>Vascunet<br>report showed<br>that the UK<br>was an outlier<br>with excess<br>mortality<br>(7.8%)<br>following open<br>surgical repair<br>of abdominal<br>aortic<br>aneurysm. The<br>effect was<br>immediate, with<br>expressions of<br>disbelief from<br>UK vascular<br>surgeons. This<br>was despite<br>other<br>publications<br>showing similar<br>mortality rates<br>around that<br>time. Had this<br>international<br>comparison not<br>been done the<br>UK vascular<br>surgeons may<br>well not have<br>picked up on<br>this being a<br>problem. The<br>consequence<br>of this<br>knowledge was<br>the<br>development of<br>a quality<br>improvement<br>framework<br>(QIF) by the<br>Vascular<br>Society of<br>Great Britain &<br>Ireland<br>(VSGBI) setting<br>a target to<br>reduce | NS                                                                                           | NS |

mortality to 3.5% by 2013. Since this time, mortality rates have improved. Vasconet and the Vascular Society believe that international comparative audit has been good for UK vascular surgeons. It has dispelled fixed attitudes about the quality of care we provide, and we are beginning to show improvement. This will have benefits for our patients, not just in terms of outcome, but also in the change to our processes, increasing patient communication and ensuring that patients are brought to optimal fitness prior to intervention

|          |                                                                    |      |                                                                  |                                      |    |    |                                                                                                                                                                    |    |    |    |                                                                                                                      |                                                                                                                                               |                                                                                                                                                                   |                                                                                                           |    |    |                                                                                                                                                                                                                        |    |    |                                                |
|----------|--------------------------------------------------------------------|------|------------------------------------------------------------------|--------------------------------------|----|----|--------------------------------------------------------------------------------------------------------------------------------------------------------------------|----|----|----|----------------------------------------------------------------------------------------------------------------------|-----------------------------------------------------------------------------------------------------------------------------------------------|-------------------------------------------------------------------------------------------------------------------------------------------------------------------|-----------------------------------------------------------------------------------------------------------|----|----|------------------------------------------------------------------------------------------------------------------------------------------------------------------------------------------------------------------------|----|----|------------------------------------------------|
| Mason R. | Pulmonary Langerhans' cell histiocytosis (PLCH): A new UK register | 2012 | National Pulmonary Langerhans cell histiocytosis (PLCH) Register | Management of PLCH including surgery | NS | NS | This is a research letter describing the registry. The aim of the registry was to characterise the UK population suffering from PLCH and to enable future research | NS | NS | NS | Demographics, symptoms, smoking history, lung function, surgical biopsy results, treatment including lung transplant | Demographic and clinical data were collected by post, from individual patients, their respiratory clinicians and their general practitioners. | Advertisements in the eBritish Thoracic Society (BTS) bulletin, at BTS meetings, the BTS BOLD conference and by contacting all UK interstitial lung disease leads | One hundred and six patients (17 deceased, 8 lost to follow-up) were initially identified from 53 centres | NS | NS | Patients joined the register voluntarily, potentially introducing selection and referral bias. Missing data from deceased patients or those lost to follow-up may also have introduced survivorship and selection bias | NS | NS | Consent taken from all patients that gave data |
|----------|--------------------------------------------------------------------|------|------------------------------------------------------------------|--------------------------------------|----|----|--------------------------------------------------------------------------------------------------------------------------------------------------------------------|----|----|----|----------------------------------------------------------------------------------------------------------------------|-----------------------------------------------------------------------------------------------------------------------------------------------|-------------------------------------------------------------------------------------------------------------------------------------------------------------------|-----------------------------------------------------------------------------------------------------------|----|----|------------------------------------------------------------------------------------------------------------------------------------------------------------------------------------------------------------------------|----|----|------------------------------------------------|

|            |                                        |      |                                        |                |    |                    |                                                                                                                                                                                                                   |                                                                                                                                                                                                                                                                                                                                                                                                                                        |                                                                                                                                                                                                                                                                               |                                                                                                                                                                                                 |                                                                                                                                                                                               |    |                                                                                                                                                                                                                                                                                                                                                                                                                                                                                                                         |    |    |                                                                                                                                                                                                                                       |                                                                   |                                                                                                                                                                                                                                                                                                                                                                                                                                                                     |    |    |
|------------|----------------------------------------|------|----------------------------------------|----------------|----|--------------------|-------------------------------------------------------------------------------------------------------------------------------------------------------------------------------------------------------------------|----------------------------------------------------------------------------------------------------------------------------------------------------------------------------------------------------------------------------------------------------------------------------------------------------------------------------------------------------------------------------------------------------------------------------------------|-------------------------------------------------------------------------------------------------------------------------------------------------------------------------------------------------------------------------------------------------------------------------------|-------------------------------------------------------------------------------------------------------------------------------------------------------------------------------------------------|-----------------------------------------------------------------------------------------------------------------------------------------------------------------------------------------------|----|-------------------------------------------------------------------------------------------------------------------------------------------------------------------------------------------------------------------------------------------------------------------------------------------------------------------------------------------------------------------------------------------------------------------------------------------------------------------------------------------------------------------------|----|----|---------------------------------------------------------------------------------------------------------------------------------------------------------------------------------------------------------------------------------------|-------------------------------------------------------------------|---------------------------------------------------------------------------------------------------------------------------------------------------------------------------------------------------------------------------------------------------------------------------------------------------------------------------------------------------------------------------------------------------------------------------------------------------------------------|----|----|
| Elson D.W. | The UK Knee Osteotomy Registry (UKKOR) | 2015 | The UK Knee Osteotomy Registry (UKKOR) | Knee Osteotomy | NS | Steering committee | Aim of the registry is to improve the quality of patient care by monitoring outcomes. Specific goals: Define patient selection criteria, identify the devices and surgical techniques which give the best results | Electronic/web-based registries have a distinct advantage in terms of staffing requirements and costs of paper based registries. UKKOR has been established by surgeons, independent of government agencies. Amplitude data platform (hosted by Bluespир) has been selected. The steering group deliberately approached several industry stakeholders in order to maintain a neutral bias towards any one company or commercial party. | Funding received from five companies with a stake in osteotomy surgery. Sponsoring companies will have access to performance data on their own products but not their competitors. In addition BASK have been supportive of the project and provided a generous priming grant | The inclusion of patient reported outcome measures is vital to increase any registries' sensitivity to define success. UKKOR has chosen to follow the same model employed by the NLR committee. | Demographics, patient co-morbidities, oxford knee score (OKS), the knee injury and osteoarthritis outcome score (KOOS), EuroQol (EQOD) Activity questionnaire (OKS-APQ) from the Oxford group | NS | Clinicians can recognise that the registry will be useful as a governance instrument providing information for appraisal and revalidation. To increase compliance from both patients and clinicians, the registry has a visually appealing website which is informative and engaging with the inclusion of video explanations. All future publications drawing conclusions from UKKOR data will be authored by the "UKKOR research collaborative." Thus all surgeons who contribute patients and data will be listed as | NS | NS | Patients will be persuaded to participate because they can see their charted progress after surgery. Patients tend to have email address and phone number and this information is critical to facilitate automated patient follow-up. | Compliance from both patients and surgeons is a potential concern | Clinical registries use observational study methods from a broad population base and so their findings have strong external validity. The larger sample size from a registry database allows analysis of the multiple variables which can influence outcome. In addition, a prospective collection of complications (perceived by both patient as well as surgeon) offers transparency which should enlighten the consent process and improve patient understanding | NS | NS |
|------------|----------------------------------------|------|----------------------------------------|----------------|----|--------------------|-------------------------------------------------------------------------------------------------------------------------------------------------------------------------------------------------------------------|----------------------------------------------------------------------------------------------------------------------------------------------------------------------------------------------------------------------------------------------------------------------------------------------------------------------------------------------------------------------------------------------------------------------------------------|-------------------------------------------------------------------------------------------------------------------------------------------------------------------------------------------------------------------------------------------------------------------------------|-------------------------------------------------------------------------------------------------------------------------------------------------------------------------------------------------|-----------------------------------------------------------------------------------------------------------------------------------------------------------------------------------------------|----|-------------------------------------------------------------------------------------------------------------------------------------------------------------------------------------------------------------------------------------------------------------------------------------------------------------------------------------------------------------------------------------------------------------------------------------------------------------------------------------------------------------------------|----|----|---------------------------------------------------------------------------------------------------------------------------------------------------------------------------------------------------------------------------------------|-------------------------------------------------------------------|---------------------------------------------------------------------------------------------------------------------------------------------------------------------------------------------------------------------------------------------------------------------------------------------------------------------------------------------------------------------------------------------------------------------------------------------------------------------|----|----|

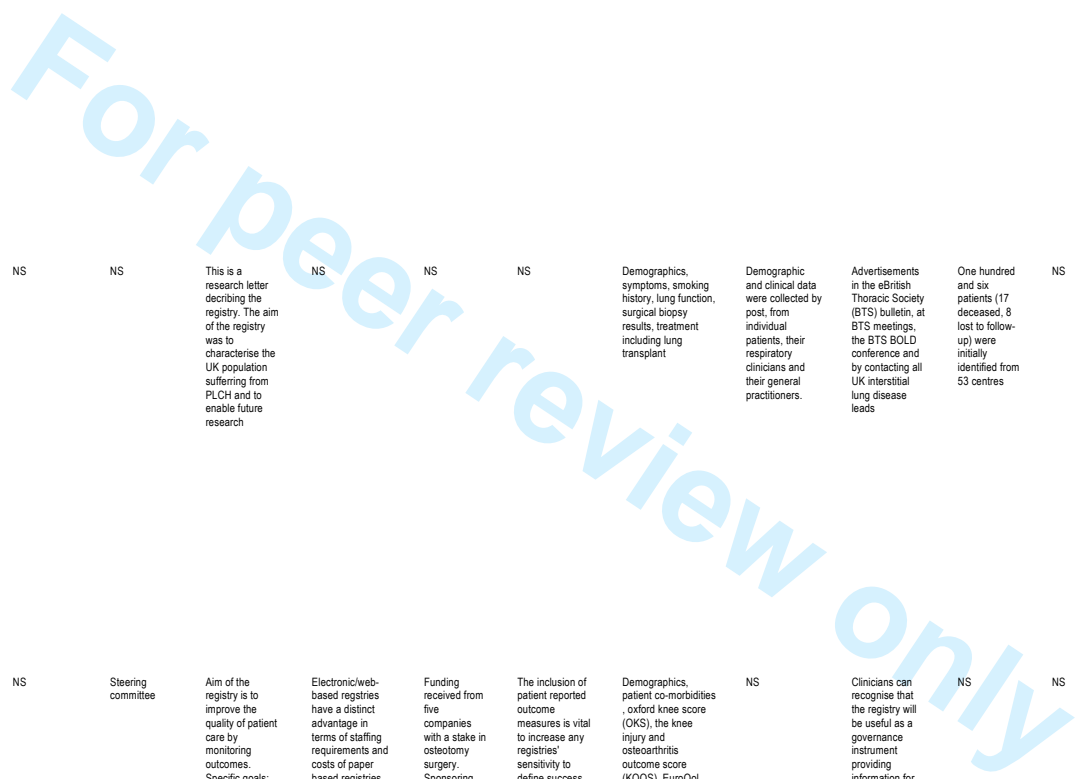

1  
2  
3  
4  
5  
6  
7  
8  
9  
10  
11  
12  
13  
14  
15  
16  
17  
18  
19  
20  
21  
22  
23  
24  
25  
26  
27  
28  
29  
30  
31  
32  
33  
34  
35  
36  
37  
38  
39  
40  
41  
42  
43  
44  
45  
46  
47

1  
2  
3  
4  
5  
6  
7  
8  
9  
10  
11  
12  
13  
14  
15  
16  
17  
18  
19  
20  
21  
22  
23  
24  
25  
26  
27  
28  
29  
30  
31  
32  
33  
34  
35  
36  
37  
38  
39  
40  
41  
42  
43  
44  
45  
46  
47

|                                                                            |                                                                                                                                           |      |                                                                                                                                                             |                                                |                                                                                                                                                                     |                                                                                                                                                                                                                                                                                                                                                                                                                                                                                                                                                                                                                                                            |                                                                                                                                                                                                                                                                                                                                                                                                                                                   |                                                                                                                                                                                                                                                                                                                                                                                                                                                                                                                                                                                                                                                                                                                                                                                                                                                                                                       |                                                                                                                                                                                                                                                                                                                                                                                                                                                                                 |                                                                                                                                                             |                                                                                                                                                                                                                                                                                                                                                                                      |                                                                                                                                                                                                                                                                                                                                                                                                                                                                                                                                                                                                                                                                                                                                                                                                             |                                                                                                                                                                                                                                                                                                                                                                                                                                                                                                                                                                                                                                                                                                                                                                                                                       |                                                                                                                                                                                                                                                   |                                                                                                                                                                                                                                      |                                                                                                                                                                                                                                                                                                                                                                                                                                                                                                                                                                                                                                                                   |    |                                                                                                                                                                                                                                                                                                                                                                                                                                                                   |                                                                                                                                                                 |                                                                                                                                                                                                                                                                                                                                                                                                     |
|----------------------------------------------------------------------------|-------------------------------------------------------------------------------------------------------------------------------------------|------|-------------------------------------------------------------------------------------------------------------------------------------------------------------|------------------------------------------------|---------------------------------------------------------------------------------------------------------------------------------------------------------------------|------------------------------------------------------------------------------------------------------------------------------------------------------------------------------------------------------------------------------------------------------------------------------------------------------------------------------------------------------------------------------------------------------------------------------------------------------------------------------------------------------------------------------------------------------------------------------------------------------------------------------------------------------------|---------------------------------------------------------------------------------------------------------------------------------------------------------------------------------------------------------------------------------------------------------------------------------------------------------------------------------------------------------------------------------------------------------------------------------------------------|-------------------------------------------------------------------------------------------------------------------------------------------------------------------------------------------------------------------------------------------------------------------------------------------------------------------------------------------------------------------------------------------------------------------------------------------------------------------------------------------------------------------------------------------------------------------------------------------------------------------------------------------------------------------------------------------------------------------------------------------------------------------------------------------------------------------------------------------------------------------------------------------------------|---------------------------------------------------------------------------------------------------------------------------------------------------------------------------------------------------------------------------------------------------------------------------------------------------------------------------------------------------------------------------------------------------------------------------------------------------------------------------------|-------------------------------------------------------------------------------------------------------------------------------------------------------------|--------------------------------------------------------------------------------------------------------------------------------------------------------------------------------------------------------------------------------------------------------------------------------------------------------------------------------------------------------------------------------------|-------------------------------------------------------------------------------------------------------------------------------------------------------------------------------------------------------------------------------------------------------------------------------------------------------------------------------------------------------------------------------------------------------------------------------------------------------------------------------------------------------------------------------------------------------------------------------------------------------------------------------------------------------------------------------------------------------------------------------------------------------------------------------------------------------------|-----------------------------------------------------------------------------------------------------------------------------------------------------------------------------------------------------------------------------------------------------------------------------------------------------------------------------------------------------------------------------------------------------------------------------------------------------------------------------------------------------------------------------------------------------------------------------------------------------------------------------------------------------------------------------------------------------------------------------------------------------------------------------------------------------------------------|---------------------------------------------------------------------------------------------------------------------------------------------------------------------------------------------------------------------------------------------------|--------------------------------------------------------------------------------------------------------------------------------------------------------------------------------------------------------------------------------------|-------------------------------------------------------------------------------------------------------------------------------------------------------------------------------------------------------------------------------------------------------------------------------------------------------------------------------------------------------------------------------------------------------------------------------------------------------------------------------------------------------------------------------------------------------------------------------------------------------------------------------------------------------------------|----|-------------------------------------------------------------------------------------------------------------------------------------------------------------------------------------------------------------------------------------------------------------------------------------------------------------------------------------------------------------------------------------------------------------------------------------------------------------------|-----------------------------------------------------------------------------------------------------------------------------------------------------------------|-----------------------------------------------------------------------------------------------------------------------------------------------------------------------------------------------------------------------------------------------------------------------------------------------------------------------------------------------------------------------------------------------------|
| Van Gijn W.<br>Wouters M.W.J.M.<br>Peeters K.C.M.J.<br>Van De Velde C.J.H. | Nationwide outcome registrations to improve quality of care in rectal surgery. An initiative of the European Society of Surgical Oncology | 2009 | This papers provides an overview of a number of European audits. We have collected data on UK audit(s) only: National Bowel Cancer Audit Programme (NBOCAP) | Colorectal cancer treatment including surgery. | NS                                                                                                                                                                  | The Association of Coloproctology of Great Britain and Ireland (ACPGBI)                                                                                                                                                                                                                                                                                                                                                                                                                                                                                                                                                                                    | This paper provides an overview of the current European audit initiatives on rectal cancer and reflect on data-collection, outcome analysis and the results reported in the literature. We have collected data on UK audits only and general lessons learnt. The NBOCAP aims to improve outcomes from bowel cancer in the UK by promoting a careful and comprehensive collection of information on all patients who suffer from colorectal cancer | NS                                                                                                                                                                                                                                                                                                                                                                                                                                                                                                                                                                                                                                                                                                                                                                                                                                                                                                    | NS                                                                                                                                                                                                                                                                                                                                                                                                                                                                              | NS                                                                                                                                                          | Length of stay, mortality                                                                                                                                                                                                                                                                                                                                                            | Feedback to participating hospitals should become an important feature to improve quality of care. An important condition for the success of outcome registries is the quality of the collected data. Data have to be prospective, complete, case-mix adjusted and preferably collected by independent investigators. In addition, the quality of the data has to be assured by a second independent registry                                                                                                                                                                                                                                                                                                                                                                                               | NS                                                                                                                                                                                                                                                                                                                                                                                                                                                                                                                                                                                                                                                                                                                                                                                                                    | 17% of all Trusts in England and Wales submitted complete data in 2007. There is not yet enough coverage to allow solid feedback. However, it is enough to create risk-adjusted models required to give a fair comparative feedback in the future | Annual reports                                                                                                                                                                                                                       | NS                                                                                                                                                                                                                                                                                                                                                                                                                                                                                                                                                                                                                                                                | NS | The existence of an audit improves performance (Hawthorne effect). The feedback of reliable data on individual performance of hospitals and/or surgeons catalysts quality improvements. Apart from a professional impetus to improve quality of care, there is a public demand for health care providers to justify the costs as well as the quality of the health care they deliver - Registries help provide this information                                   | A high level of confidence in the validity of the data among the participants, is one of the most important factors determining the success of a surgical audit | NS                                                                                                                                                                                                                                                                                                                                                                                                  |
| NELA Project Team                                                          | National Emergency Laparotomy Audit (NELA) Protocol                                                                                       | 2014 | NELA. This paper discussed the protocol for NELA                                                                                                            | Emergency laparotomy                           | Royal College of Anaesthetists, the Clinical Effectiveness Unit of the Royal College of Surgeons of England and the Intensive Care National Audit & Research Centre | Royal college of anaesthetists. NELA will be delivered by a central Project Team from the National Institute of Academic Anaesthesia's Health Services Research Centre based at the RCoA. Formal oversight will be provided by a Project Board consisting of key stakeholders. Scientific input will be provided by a Clinical Reference Group consisting of representative s from all relevant clinical professional and specialty stakeholders (including patient groups). The Project Board members are the decision makers and responsible for the commitment of resources to the project, such as personnel, funding and equipment. The Project Board | To enable the improvement of the quality of care for patients undergoing emergency laparotomy through the provision of high quality comparative data from all providers of emergency laparotomy                                                                                                                                                                                                                                                   | Online Web tool. In Year 1 an Organisational Audit was performed, with individual patient data collection in Years 2 and 3. NELA data will be linked to other sources of routine data including Critical Care Data (Intensive Care National Audit and Research Centre (ICNARC) case mix programme), Bowel Cancer Data (National Bowel Cancer Audit/Upper Gastro-intestinal Cancer Audit) and Hospital Episode Statistics (mortality data). The NELA has a Clinical reference group (CRG). The CRG is made up of relevant clinical professionals and specialty stakeholders and has direct input into the design and conduct of the audit. Senior representative(s) from the CRG sit on the Project Board as Senior User(s). The CRG consists of representatives from partner organisations as well as other stakeholders including patients. The CRG acts as a boundary capacity to the Project Team. | Funding from HQIP. NELA was one of the top two national clinical audits prioritised for immediate funding, in response to HQIP's call for new national audit topic proposals in 2011. It was commissioned following evidence of a high incidence of death, and a wide variation in the provision of care and mortality, for patients undergoing emergency laparotomy in hospitals across England and Wales. Funded for 3 years with the potential of a further 2 year extension | During the course of the audit, the team will explore the potential for patient reported outcome measures to be included in the Programme when appropriate. | Patient demographics, mortality, length of stay, time of admission, type of operation, time when consultant surgeon reviewed patient, time of operation, time of antibiotics, input by consultant during the operation, seniority of individual performing operation, seniority of CT scan reporting, time to access of theatres, operative urgency, critical care admission post op | Each NELA participant taking part is given a login, which enables the user to access and contribute data. The NELA Project Team is made up of methodologists, statisticians. Quality Improvement specialists and clinical fellows who will be analysing the patient data. The data will be analysed alongside the surgical and anaesthetic standards currently in place so as to see how many of them are being met and in what percentage of participating sites. The Project Team will also be linking Year 1 data with figures from the Office of National Statistics (ONS) and Hospital Episode Statistics (HES). By doing so they will be able to examine how many patients who underwent emergency laparotomy and were included in the audit were recommended to die and how many of the patient died | Increase engagement by enabling participating sites to constantly review and analyse their hospital's results and improve the quality of patient care. Participating centres can use the web tool's export function and transfer their patient results onto an excel spreadsheet. The Project Team is in the process of developing a QI 'dashboard' for the NELA online web tool. The dashboard will feed back patient information to users in real time allowing them to examine the demographics of patients undergoing emergency laparotomy at their site while also looking at how often key targets are being met. In October 2014 the Project Team published the Organisational Audit Action Plan, a form which provides a plan to assist sites in ensuring compliance with the recommendations laid out in the | The first year of the Patient Audit saw over 20,500 patient cases entered with 100% of the 191 of the participating hospitals contributing patient data                                                                                           | Publication of reports on website - available to public. Reports sent to participating trusts chief executives shortly before publication and other stakeholders. Report findings communicated at regional and national conferences. | Patient act a stakeholders and formed part of the CRC which was tasked with audit development and running. While NELA does not require a patient's consent to be included in the audit, it is important to the Project Team that patients are aware of their inclusion in NELA and that they work closely with patient liaison groups. For this reason a patient representative is present on both the Project Board and the Clinical Reference Group and the audit's website features a page designed to educate patients on what NELA is and how the audit is being conducted. The NELA website has a section of FAC's for frequent questions asked by patients | NS | NELA enables participants to examine their hospitals' results while also seeing how they compare to the audit-wide average formed by the rest of their fellow participants. Enables secondary care providers to improve the delivery of care to patients undergoing emergency laparotomy using information produced by the audit. Facilitates the development of effective change (quality improvement) initiatives and thereby spread examples of best practice. | NS                                                                                                                                                              | Due to the fact that patient information (such as patient name, DOB, NHS number, etc.) is visible on the web tool a new user requires a trust or NHS email address in order to be registered. Additionally, the web tool has been designed so as to not allow members of the Project Team access to sensitive information when logged in, with all patient identifiable data having been anonymised |

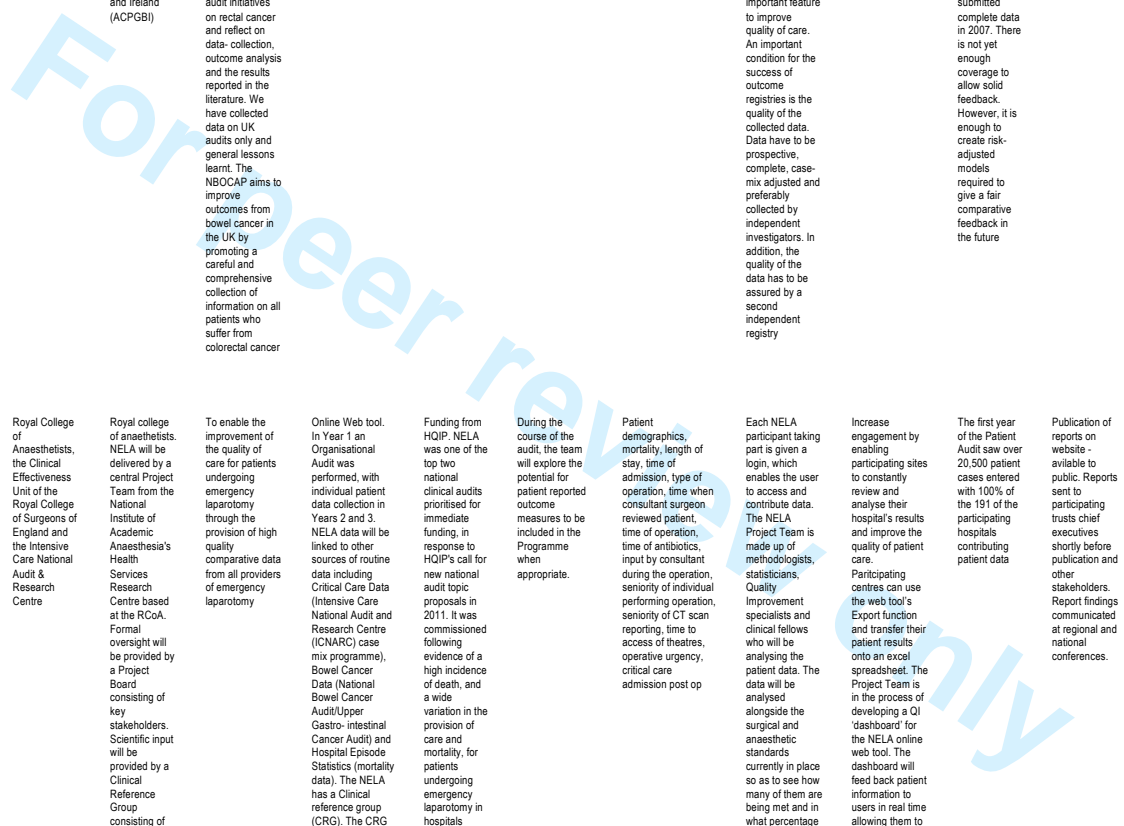

within 30 or 60 days of their initial procedure.

NELA Organisational Report and if not, what actions need to be taken to achieve these aims

oversees strategic direction and is responsible for monitoring all aspects of delivery of the project, and is accountable to the stakeholder organisations. The Project Board meets 6-monthly and receives direct reports on the delivery of the project from members of the Project Team leaders (Chair, Clinical Lead and Methodologist) as well as minutes from the Clinical Reference Group. The Executive is ultimately accountable for the project, supported by the Senior User and Senior Supplier (HOIP) - Senior Supplier (responsible for providing the goods or services) - will be ultimately accountable for delivery of the project. The Senior User (responsible for defining what is required from the project) - commits user resources to the project. The NELA Project Team is responsible for the ongoing delivery of the Project. Project Chair - Overall responsibility for delivery of the project. Clinical Lead - Responsible for liaison with the Clinical Reference Group members, liaison with NHS emergency laparotomy network, providing clinical advice during analysis, dissemination of audit results and working on quality improvement initiatives. Project Manager - Responsible for day to day management of the project

providing speciality specific advice, and lay advice as appropriate. The CRG reviews the audit design regularly and also reviews drafts of any reports and recommendations issued. CRG consisted of: Trsu management representative, RCS, royal college of radiologists, Royal College of nursing, royal college of anaesthetists, quality observatores, patient representatives from anaesthesia, surgery and the elderly, NHS emergency laparotomy network, intensive care society, British geriatric society, ASGBI, AAGBI, association of peroperative practice, age anaesthesia association.

For peer review only

1  
2  
3  
4  
5  
6  
7  
8  
9  
10  
11  
12  
13  
14  
15  
16  
17  
18  
19  
20  
21  
22  
23  
24  
25  
26  
27  
28  
29  
30  
31  
32  
33  
34  
35  
36  
37  
38  
39  
40  
41  
42  
43  
44  
45  
46  
47



1  
2  
3  
4  
5  
6  
7  
8  
9  
10  
11  
12  
13  
14  
15  
16  
17  
18  
19  
20  
21  
22  
23  
24  
25  
26  
27  
28  
29  
30  
31  
32  
33  
34  
35  
36  
37  
38  
39  
40  
41  
42  
43  
44  
45  
46  
47

National Hip Fracture Registry 2015, annual report and NHFD Preliminary National Report 2009

NHFD Hip fractures

Royal College of Physicians (RCP), British Orthopaedic Association, British Geriatrics Society, RGS, Age UK, National Osteoporosis Society, Falls and Fractures Alliance, HQUIP

NHFD is run by an Executive representing the core clinical specialities, and also includes representation from a patient group. A larger and more broadly-based Steering Group provides advice and a smaller Implementation Group, deals with project development, data analysis, and the generation of reports. A data set subgroup is responsible for the monitoring and further development of the NHFD standard data set. The NHFD is managed by the Clinical Effectiveness and Evaluation Unit (CEEU) of the Royal College of Physicians (RCP) as part of the Falls and Fragility Fracture Audit Programme (FFFAP) alongside the Fracture Liaison Service Database (FLS-DB) and Falls Pathway workstream

To improve the delivery of care for patients having falls or sustaining fractures through effective measurement against standards and feedback to provider

The National Hip Fracture Database was set up as a collaborative venture by the British Orthopaedic Association and the British Geriatrics Society in 2007. Work towards the establishment of NHFD started in 2004, with a series of meetings by clinicians mainly from the British Orthopaedic Association and the British Geriatrics Society. These team members examined the experience of existing hip fracture audits with a view to building a preliminary national database and establishing a nationally agreed dataset. By 2007 – with the support of the NHS Information Centre, and learning from the highly successful Myocardial Infarction National Audit Project (MINAP) – NHFD was able to provide participating trauma services with a comprehensive national audit that could help them monitor and improve their care. In parallel was the development of the Blue Book - a multi-disciplinary authorship group that included anaesthetic, orthogeriatric, general practice, nursing, orthopaedic and pharmacological expertise that reviewed the current evidence on fragility fracture care and produced a concise and practical 75-page handbook. Crown Informatics is the web provider and this has enabled the development of a more interactive, user-friendly website. Website is continuously being upgraded to provide graphical 'real-time' information to support the monthly clinical governance meetings.

The development of NHFD since 2004 has depended upon the support of the British Orthopaedic Association (BOA), the British Geriatrics Society (BGS) and other relevant professional groups; and on generous funding from the Association of the British Pharmaceutical Industry (ABPI) and Association of British Healthcare Industries (ABHI), the professional bodies of the pharmaceutical and devices industries respectively. A substantial grant was obtained from the Department of Health. Total income for 2007/2008 was £519,605 with a total expenditure for the same period of £458,188. Following the set up of the registry, ongoing funding has been from HQUIP. The cost of reliable data collection is estimated at around £50-60 per case - this cost should be seen in relation to the overall cost of hip fracture care.

Many hospitals participating in the NHFD do not actively follow up their patients after discharge, so to calculate 30-day mortality NHFD relies on obtaining validated, third-party mortality data from the Office for National Statistics (ONS). They then use a casemix-adjustment model to ensure that reported mortality figures are appropriate for the demographics of the local patient population. LOS is analysed with an annualised line that smooths out seasonal variation. The registry has a Best Practice Tariff run chart that allows hospitals to see what proportion of their patients are receiving key elements of best clinical care and overall BPT attainment. The NHFD only excludes patients from analyses that prove impossible due to specific deficiencies in their dataset, but still include them in any other analyses for which relevant dataset fields are complete. Data quality issues can be addressed by well-funded data collection, and by the use of data quality checking mechanisms

Use of web-based technology facilitates information transfer, data handling, analysis and feedback, and advice and user support. Regular feedback to participating units helps maintain interest and increase participation in the registry. During the NHFD launch, advertisement via press coverage, presentations at relevant national meetings, and word of mouth ensured that the rate of participation was rapid. NHFD has since 2015's report been using colour coding and grading in their tables to allow readers to ascertain how their hospital is performing and in which quartile their practice lies when compared with national performance. Benchmarking comparisons between hospitals are difficult, as different trauma units have very differing hospitals in their catchment area. For this reason NHFD has developed a run chart that allows individual hospitals to benchmark their performance against their own previous figures, and to monitor the effectiveness of local initiatives to avoid inpatient falls.

When the registry first started, there were concerns about both the completeness and the quality of data. This has been addressed over the years of the registry and currently all 180 eligible hospitals in England, Wales and Northern Ireland are now regularly uploading data.

Annual reports, research and quality improvement projects. The NHFD website provides summary data for local teams to use eg admission numbers, time to an orthopaedic ward, time to surgery, casemix, performance against NICE standards - these are set against reference lines derived from national average figures. NHFD has since 2015's report been using colour coding and grading in their tables to allow readers to ascertain how their hospital is performing and in which quartile their practice lies when compared with national performance. Benchmarking comparisons between hospitals are difficult, as different trauma units have very differing hospitals in their catchment area. For this reason NHFD has developed a run chart that allows individual hospitals to benchmark their performance against their own previous figures, and to monitor the effectiveness of local initiatives to avoid inpatient falls.

Website charts will be made to the public as part of NHFD's commitment to the transparency of audit data

Continuous and comprehensive data capture is challenging, and hard to achieve using already busy clinical staff with inevitably conflicting priorities. In particular, rigorous documentation of time of arrival and follow-up at 30 and 120 days is challenging. In 2015 there was poor reporting of pressure ulcers (4180, 2%) and no reoperations (47/180, 26%), suggesting that hospitals have no mechanism to monitor these patient safety concerns. In earlier registry reports, they identified concerns about data completion and inaccuracies of data included (eg fracture type, nature of surgery, follow up. This has improved over time.

When 2007 (start of registry) and 2011 rates of early surgery increased from 54.5% to 71.3% nationally, having been stable previously. Thirty-day mortality fell from 10.9% to 8.5%, compared with a smaller reduction from 11.5% to 10.9% before 2007. Annual relative reduction in adjusted 30-day mortality was just 1.8% from 2003 to 2007, but 7.6% over 2007-11 (p<0.001). The study results suggest that by 2011 around 1,000 fewer people a year died within 30 days of hospital admission for hip fracture than would be expected had pre-2007 time trends continued as before. Some of this additional improvement could be due to other policies, as well as the introduction of the NHFD. The NHFD occupies an increasingly central position in supporting other agencies to monitor and evaluate the quality of healthcare delivered to frail older people. These agencies include (CCG, Monitor, CCGs, NICE). Registry enables participating centres to learn from theirs and others experiences and improve care

Prompt and reliable feedback to participating units is an essential feature of successful audit

Personal confidential data items for this audit were processed by Crown Informatics under section 251 (of the NHS Act 2006) approval, prior to anonymisation. Data are anonymised and securely transferred to the Royal College of Surgeons of England for analysis. Data were collected and processed with approval of the secretary of state for health on the recommendation of the Health Research Authority (HRA) Confidentiality Advisory Group (CAG) under the Health Service (Control of Patient Information) Regulations 2002. This is more commonly referred to as section 251 approval, and references to 'section 251 support or approval' actually refer to approval given under the authority of these regulations. Secure access for staff involved in the treatment of patients with hip fracture to the NHFD database is requested by the NHFD lead clinician for each organisation that uploads data. Once the request is validated, secure access is provided by the NHFD administration team to facilitate data entry to the audit. The data are entered via a secure website, and access to this is via a secure login name and password

BMJ Open

|                                                                                                                                                                                                                                                                                                                                    |                                                                              |                                                                                                         |              |                                   |                                                                                                                                            |                                                                                                                                                                                                                                                                                                           |                                                                                                                                                                                                                                                                               |                                                                                                                                                                                                                                                                                                                                         |                                                                                                                                                                                                                                                                                                                                                                                                                                                                                                                                                                                                                                                                                                                                                                                                                                                                                                                                                                                                                                                                                    |                                                                                                                                                                                                                                                                                                |                                                                                                                                                                                                                                                                                                                                                                  |                                                                                                                                                                                                                                                                                                                                                                                                                                   |                                                                                                                                                                                                                                                                                                                                                                                                         |                                                                                                                                                                                                                                                                                                                                                                                                                                                                                                                                                                                                                                                                                                                                                                                                                                                                                                                                                                    |                                                                                                                                                                                                                                                                                                                                                                                                                                                                                                                                                                                                                                                                                                                                                                                                                                                                                                                                                           |                                                                                                                                                                                                                                                                                                                                                                |                                                                                                                                                                                                                                                                                        |                                                                                                                                                                                                                                                                                                                                                                                                                                                                                                                                                 |                                                                                                                                                                                                                                                                                                                        |                                                                                                                                                                                                                                                                                                                                             |
|------------------------------------------------------------------------------------------------------------------------------------------------------------------------------------------------------------------------------------------------------------------------------------------------------------------------------------|------------------------------------------------------------------------------|---------------------------------------------------------------------------------------------------------|--------------|-----------------------------------|--------------------------------------------------------------------------------------------------------------------------------------------|-----------------------------------------------------------------------------------------------------------------------------------------------------------------------------------------------------------------------------------------------------------------------------------------------------------|-------------------------------------------------------------------------------------------------------------------------------------------------------------------------------------------------------------------------------------------------------------------------------|-----------------------------------------------------------------------------------------------------------------------------------------------------------------------------------------------------------------------------------------------------------------------------------------------------------------------------------------|------------------------------------------------------------------------------------------------------------------------------------------------------------------------------------------------------------------------------------------------------------------------------------------------------------------------------------------------------------------------------------------------------------------------------------------------------------------------------------------------------------------------------------------------------------------------------------------------------------------------------------------------------------------------------------------------------------------------------------------------------------------------------------------------------------------------------------------------------------------------------------------------------------------------------------------------------------------------------------------------------------------------------------------------------------------------------------|------------------------------------------------------------------------------------------------------------------------------------------------------------------------------------------------------------------------------------------------------------------------------------------------|------------------------------------------------------------------------------------------------------------------------------------------------------------------------------------------------------------------------------------------------------------------------------------------------------------------------------------------------------------------|-----------------------------------------------------------------------------------------------------------------------------------------------------------------------------------------------------------------------------------------------------------------------------------------------------------------------------------------------------------------------------------------------------------------------------------|---------------------------------------------------------------------------------------------------------------------------------------------------------------------------------------------------------------------------------------------------------------------------------------------------------------------------------------------------------------------------------------------------------|--------------------------------------------------------------------------------------------------------------------------------------------------------------------------------------------------------------------------------------------------------------------------------------------------------------------------------------------------------------------------------------------------------------------------------------------------------------------------------------------------------------------------------------------------------------------------------------------------------------------------------------------------------------------------------------------------------------------------------------------------------------------------------------------------------------------------------------------------------------------------------------------------------------------------------------------------------------------|-----------------------------------------------------------------------------------------------------------------------------------------------------------------------------------------------------------------------------------------------------------------------------------------------------------------------------------------------------------------------------------------------------------------------------------------------------------------------------------------------------------------------------------------------------------------------------------------------------------------------------------------------------------------------------------------------------------------------------------------------------------------------------------------------------------------------------------------------------------------------------------------------------------------------------------------------------------|----------------------------------------------------------------------------------------------------------------------------------------------------------------------------------------------------------------------------------------------------------------------------------------------------------------------------------------------------------------|----------------------------------------------------------------------------------------------------------------------------------------------------------------------------------------------------------------------------------------------------------------------------------------|-------------------------------------------------------------------------------------------------------------------------------------------------------------------------------------------------------------------------------------------------------------------------------------------------------------------------------------------------------------------------------------------------------------------------------------------------------------------------------------------------------------------------------------------------|------------------------------------------------------------------------------------------------------------------------------------------------------------------------------------------------------------------------------------------------------------------------------------------------------------------------|---------------------------------------------------------------------------------------------------------------------------------------------------------------------------------------------------------------------------------------------------------------------------------------------------------------------------------------------|
| <p>1<br/>2<br/>3<br/>4<br/>5<br/>6<br/>7<br/>8<br/>9<br/>10<br/>11<br/>12<br/>13<br/>14<br/>15<br/>16<br/>17<br/>18<br/>19<br/>20<br/>21<br/>22<br/>23<br/>24<br/>25<br/>26<br/>27<br/>28<br/>29<br/>30<br/>31<br/>32<br/>33<br/>34<br/>35<br/>36<br/>37<br/>38<br/>39<br/>40<br/>41<br/>42<br/>43<br/>44<br/>45<br/>46<br/>47</p> | <p>Clinical Effectiveness Unit, The Royal College of Surgeons of England</p> | <p>National Vascular Registry: 2015 Annual report. London: The Royal College of Surgeons of England</p> | <p>201 5</p> | <p>National vascular registry</p> | <p>Emergency or elective procedures for the following patient groups: Peripheral arterial disease, AAA repair, CEA or carotid stenting</p> | <p>National Vascular Database (NVD), the Carotid Interventions Audit, VSGBI Audit Committee</p>                                                                                                                                                                                                           | <p>The NVR is assisted by the Audit and Quality Improvement Committee of the Vascular Society and overseen by a Project Board, which has senior representatives from the participating organisations and the commissioning organisation</p>                                   | <p>Aim of the registry : To provide comparative information on the performance of NHS vascular units and support local quality improvement as well as inform patients about major vascular interventions delivered in the NHS. Aim of the 2015 report: To give an overall picture of the care provided by NHS vascular units</p>        | <p>Web-based system. The registry was created from an amalgamation of the National Vascular Database (NVD) and the Carotid Interventions Audit. A new IT system was developed in collaboration with Northgate Information Systems in 2014. The most notable changes were to the datasets for the four procedures in the old NVD and the addition of a new dataset for lower- limb angioplasty / stent procedures. These changes were based on advice from vascular specialists on ways to simplify how data were recorded, and to ensure the datasets reflect changes in clinical practice. As a result, the NVR datasets for each procedure are now smaller and the recording of patient characteristics is more consistent across the procedures. A further improvement is that the records for patients who have one operation and later come back for another are now linked. As this is a procedure based registry, it was decided to focus mainly on outcomes rather than the process of care. The registry took on-board comments from users to develop the data items.</p> | <p>Funding by HQIIP as part of the National Clinical Audit Programme (NCA). HQIP holds the contract to manage and develop the NCA Programme</p>                                                                                                                                                | <p>Appended dataset was adapted to capture key issues highlighted by the 2014 National Confidential Enquiry into Patient Outcomes and Deaths (NCEPOD) review of lower limb amputation.</p>                                                                                                                                                                       | <p>Demographics, procedure, time to surgery (emergency and elective), formal anaesthetic review, fitness measurement, pre-operative imaging, whether patient discussed at MDT meeting, procedure, mortality, complications, further unplanned intervention</p>                                                                                                                                                                    | <p>NS</p>                                                                                                                                                                                                                                                                                                                                                                                               | <p>NHS hospitals in England and Wales are required to report on their participation in the Vascular Registry as part of their Quality Account. Several online reports were introduced to support data entry. The registry team developed an online report designed to support consultant revalidation. The NVR used an IT system that has evolved following consultation with users and vascular specialists. This evolution and improvement in systems has improved data completeness. For example, some of the characteristics used for risk adjustment were typically entered for between 80-85% of patients. Variables used for risk-adjustment are now mandated which has resulted in 100% completeness for these characteristics from January 2014. When the NVR updated it's dataset, following advice from vascular specialists, they were advised to simplify how data were recorded, and to ensure the datasets reflect changes in clinical practice</p> | <p>2871 endovascular and 5387 bypass procedures (For peripheral disease) in the 2014 calendar year - corresponds to an estimated case-ascertainment of 15% and 90%, respectively. Likely that the cohort of patients captured by the NVR in 2014 for were less sick than all patients having a major lower limb amputation - this could explain the lower than expected mortality rate obtained by the NVR for lower limb amputation. From routine hospital data, estimated that there were approximately 2300 below knee and 2500 above knee amputations performed in UK hospitals for peripheral arterial disease during 2014 - vascular units submitted 1200 of the former and 1265 of the latter, giving an estimated case ascertainment of approximately 50% for both procedures. There is high case attainment for data collected by NVR for elective AAA repair and CEA. However need improvements in cas attainment for lower limb procedures</p> | <p>Annual reports. Reports contain options that allow the results to be tailored to the user's requirements.</p>                                                                                                                                                                                                                                               | <p>NS</p>                                                                                                                                                                                                                                                                              | <p>In some cases incomplete data on MDT assessment and date of imaging. Data submission rates for lower limb revascularisation need to improve if the NVR is going to reach its full potential in supporting us to make these improvements</p>                                                                                                                                                                                                                                                                                                  | <p>The data from England and Wales is particularly useful when undertaking local reviews of vascular services and commissioning groups are increasingly like to rely on this information. Helpful when comparing services nationally.</p>                                                                              | <p>NS</p>                                                                                                                                                                                                                                                                                                                                   |
| <p>36<br/>37<br/>38<br/>39<br/>40<br/>41<br/>42<br/>43<br/>44<br/>45<br/>46<br/>47</p>                                                                                                                                                                                                                                             | <p>NJR Editorial Board</p>                                                   | <p>NJR 12th Annual Report</p>                                                                           | <p>201 5</p> | <p>National Joint Registry</p>    | <p>Hip, knee, ankle, elbow, shoulder replacement surgery</p>                                                                               | <p>British Orthopaedic Association (BOA), Medical Advisory Committee (through which specialist orthopaedic societies are formally represented). International Society of Arthroplasty Registers. The NJR works with many stakeholders including patients, regulators, hospitals, industry, individual</p> | <p>The NJR is managed by the Healthcare Quality Improvement Partnership (HQIP) under a contract with NHS England as part of the delivery of the National Clinical Audit and Patient Outcomes Programme (NCAPOP). HQIP supports the work of the NJR Steering Committee and</p> | <p>To collect information on all hip, knee, ankle, elbow and shoulder replacement operations, to monitor the performance of joint replacement implants and the effectiveness of different types of surgery, improving clinical standards and benefiting patients, clinicians and the orthopaedic sector as a whole. The NJR will be</p> | <p>Developed by Department of Health and Welsh Government in 2002.</p>                                                                                                                                                                                                                                                                                                                                                                                                                                                                                                                                                                                                                                                                                                                                                                                                                                                                                                                                                                                                             | <p>The NJR is funded through a levy raised on hip, knee, ankle, elbow and shoulder procedures. Up until 31 March 2014, the NJR levy payment on hip, knee, ankle, elbow and shoulder implants was collected from purchasing hospitals by orthopaedic device manufacturers and processed the</p> | <p>The majority of the data can be collected via tick boxes, some information is required in white space format. In terms of collecting PROMS - There is interest in how patient reported outcomes of joint surgery change in the longer term and whether the outcomes of surgery are best evaluated at six months after surgery and again at a later point.</p> | <p>Patient consent, demographics, operation date, ASA grade, anaesthetic type, operation funding, consultant in charge, operating surgeon grade and name, first assistant grade, side of operation, BMI, indications, procedure, patient position, surgical approach, comorbidities, living arrangements, thromboprophylaxis regime at time of operation, untoward intraoperative events, revision cases, type of implant and</p> | <p>Data input by surgeons. Data can be entered electronically directly into the NJR database. Printed forms are also available. Currently, all patients treated by or on behalf of NHS England for an elective knee and/or hip joint replacement are invited to complete a PROMS questionnaire prior to surgery and again at six months and again at a later point. Data clearing is carried out eg</p> | <p>Any provider carrying out hip, knee, ankle, elbow or shoulder surgery is now mandated to submit 100% of eligible primary and revision procedures to the NJR (including the private sector). NJR has a supporting Data Quality Strategy. This includes a programme of work in partnership with hospitals to ensure data quality compliance. The NJR helps</p>                                                                                                                                                                                                                                                                                                                                                                                                                                                                                                                                                                                                    | <p>Compliance in data submission was 96.6%. Consent was obtained in 91.8% of cases and linkability was possible in 95.1% of cases. CNJR has a Supporting Data Quality Strategy. This outlines the registry's current and future plans for ensuring data quality compliance. Crucially, this</p>                                                                                                                                                                                                                                                                                                                                                                                                                                                                                                                                                                                                                                                           | <p>Has online annual report website 'NJR reports' Digital annual reporting arrangements and new interactive clinical activity reports. Also has annual reports. There is also publication of outcomes of individual surgeons. Specific website for patients, providing information about hospital. The reporting data quality website has historical data,</p> | <p>Drive towards patient engagement in the registry and bringing the patient voice to the heart of NJRSC decision making. Patients will be able to see individual hospital performance and compliance in terms of submitting data through the NJR data publication and NHS Choices</p> | <p>Sufficient resources for the registry. 11% of records have been excluded because there were insufficient patient details to enable linkage. Cases from Northern Ireland were excluded because there was no tracing service for them. Person-level identifier was available for 96% of operations since the beginning of 2008, but in earlier years the proportion had been much lower - therefore long-term follow up data may not be as representative as short-term follow up data. In 4.4% of cases of revision surgery, there was no</p> | <p>The registry supports transparency by using and sharing relevant hospital, surgeon and implant-pricing data, as well as enabling the linkage of NJR data with other expanding healthcare information, and helps tackle issues and problems in joint replacement surgery. The registry helps surgeons choose the</p> | <p>NS</p> <p>Must have patient consent prior to collection of data. Patient consent (to record their details in the NJR) was recorded as 93.8%. o avoid sending paper records through the post and to ensure maximum protection to the data, the NJR uses an electronic system for collecting the data. This includes a secure link for</p> |

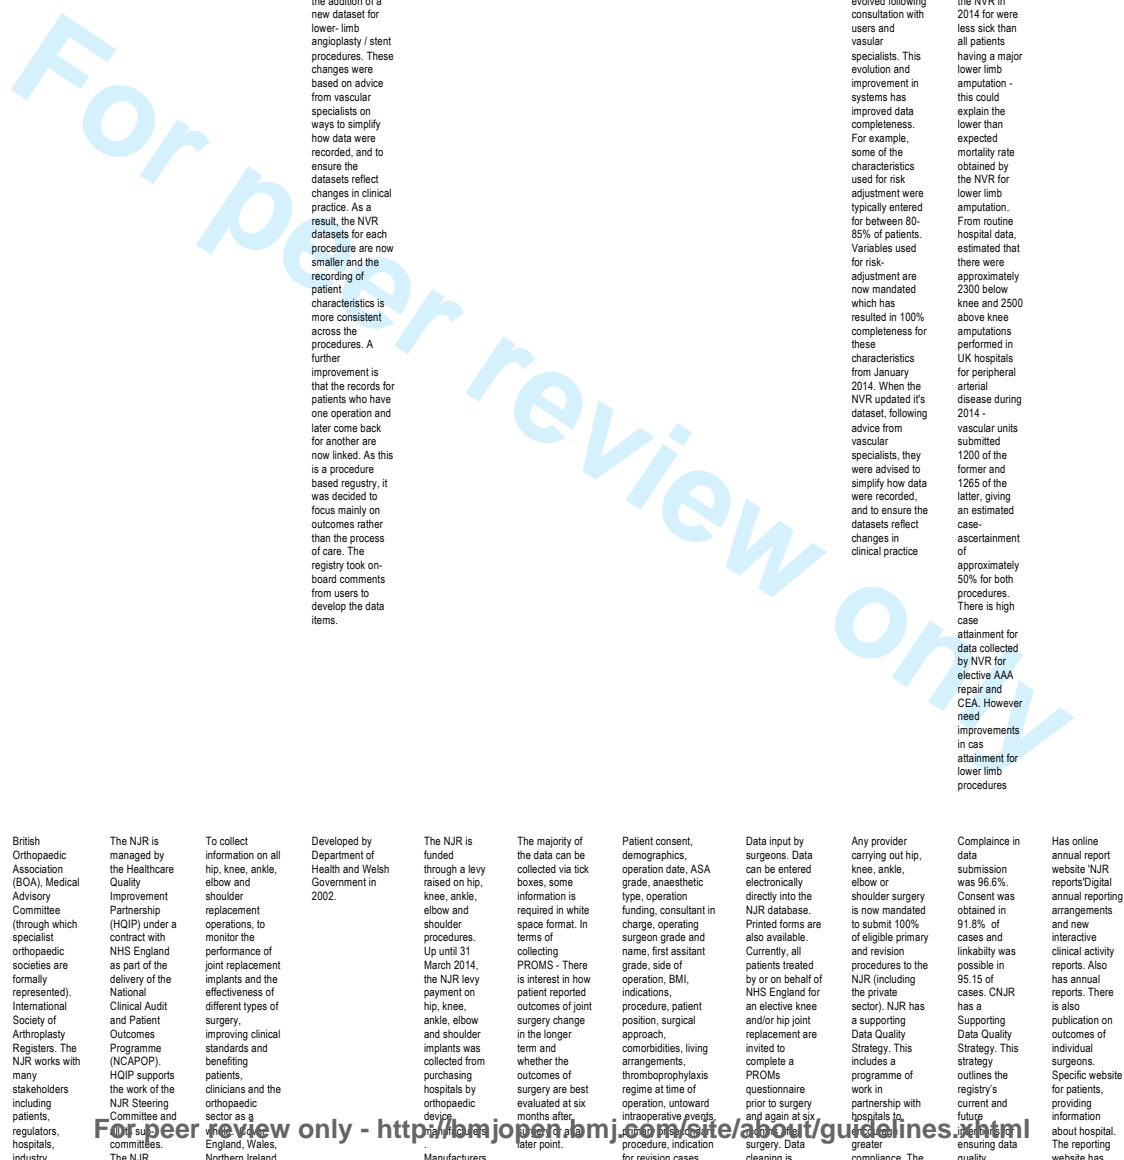

surgeons and procurement. Important to form international collaborations - to help ensure that the registry has the ability to harmonise with global orthopaedic device initiatives

Committee is an NHS England Committee of experts. There are industry representatives on the steering committee. The committee is responsible for overseeing the strategic direction of the NJR. Also have sub-committees, Implant Performance Sub-committee, Surgeon Outlier Sub-committee. There is also a NJR management team that supports the work of the Steering Committee. Regional clinical coordinators (RCCs) and regional coordinators (RCs) work in partnership to ensure that hospitals are supported in their understanding of the requirements of the NJR. The NJR Centre has been set up to manage the development and running of the NJR database for all data collection and to help share NJR information with clinicians, patients and other stakeholders

expanding to the Isle of Man

levy on behalf of the NJR and then made the payment to the registry. In return for their role in administering the levy, manufacturers charge a supplier administration fee which was included in the calculation of the levy. The cost per joint was £20.00 (inc administrative fee). From April 2014, the cost of the NJR levy is a new, lower rate of £15.60 per procedure where each provider organisation is issued with an annual invoice directly from the Healthcare Quality Improvement Partnership (HQIP) for an NJR subscription charge based upon the provider's prior year's procedure volume. Orthopaedic device manufacturers contributed towards the NJR Management Feedback system which supports post-market implant surveillance

brand, morbidity, mortality, pre and post operative PROMS (PROMS included Oxford Knee scores, EQ-5D, PROMS at 6 months post op, 1 and 3 years after their primary procedure), hospital submitting data, time to follow up, implant survivorship, white space surgeon notes

removing duplicates. Patient consent and a valid NHS number allows the NJR to link a patient's primary and revision operation together, giving a picture of implant survivorship by implant type and brand. Documentation of implant survivorship and mortality requires a person-level identifier to be able to relate primary and revision operations on the same individual. 1

increase participation through a national programme of local audits to assess data completeness and quality. These audits work to identify where data might be missing to improve the general quality of their data in the registry. Those actively taking part in the audit and achieving best practice and quality will gain the new NJR Quality Data Provider certification. Renewable annually, this award is designed to recognise quality data provision and the commitment to patient safety through compliance. The certification will also highlight those hospitals who do not comply with mandatory NJR requirements, communicating this status through the NJR data publication and NHS Choices websites, thus allowing patients to be aware of hospitals that choose not to meet NJR quality standards. When organisation provide data to the NJR, the NJR shares information it has on best implant prices that can help trusts save costs - this implant price benchmarking service is called INFORM. The introduction of the Best Practice Tariff for hip replacements provides incentives for hospitals to report data to the NJR.

includes a programme of work in partnership with hospitals to encourage greater compliance; while data capture for the NJR is mandatory, many hospitals struggle to achieve it. The number of cases reported to the registry every year is now in excess of 200,000. 2014/15 had the highest ever annual number of submissions at 226,87. The total number of procedures recorded was 1.8 million at March 2015. Patients who had elective primary knee replacement in 2010 were asked to complete pre and postoperative PROMS - of the 32,147 invited participants, 20,721 and 17,485 respectively responded at one and three years post op. Of a total of 1,837,781 NJR records, around 11% have been lost because no suitable person-level identifier was found - in around half of these 201,548 procedures (47.3%), the patient had declined to be held, the remainder being attributable to tracing and linkage difficulties. Linkability (the ability to link a patient's primary procedure to a revision procedure) was recorded as 92.8%

going back to 2005 in most cases. Using the dedicated website, readers can use interactive, filterable graphs to identify the key information and trends associated with reports for hip, knee, ankle, elbow and shoulder data. Able to see data on how many hospital are participating in the NJR. Data reporting includes mortality, rates of revision, reasons for revision, survivorship analysis. The steering committee facilitate the use of NJR data for research

websites. They have developed websites for patients that give information on how hospitals are performing. There are two patient representative steering committee

primary operation for that patient recorded in the NJR. This would have been either because the primary had taken place at an earlier point in time (before the NJR data collection period began in 2003) or was not included for other reasons such as the operation being performed outside the geographical catchment area of the NJR or consent for data linkage not being provided at the time of the primary procedure. Some revision cases were excluded because they could not be matched to primary joint replacements.

best implants for patients. It empowers patients by helping them find out more about the implants available. The registry improves patient safety by showing how well implants, surgeons and hospitals perform and take action where it is needed. It gives hospitals, surgeons and hospitals perform and take action where it is needed. It gives hospitals, surgeons and implant manufacturers feedback about their performance to help them improve patient care. It helps surgeons quickly decide whether patients need to return to hospital if implant problems are found

transferring the data from the hospital to the central database. All the data held on the central database is encrypted to provide further protection. Patients' personal data is treated as confidential at all times and cannot be used outside of the NJR. This data is only available to the patient that it relates to and their surgeon. The steering committee facilitates the use of NJR data for research. Data collected via the NJR may be used for medical research but only if it has passed ethical review and if the outcomes are expected to provide significant benefits to the healthcare of patients. However, any data provided will be anonymised so that it is not possible to identify individuals. In accordance with the Data Protection act (1998), patients can request a copy of the personal information that the NJR holds about them at any time

|                                              |                                                                                     |      |                                                       |                   |                                      |                                        |                                      |                                                                                                              |                                                                                                          |                                                                                                                                                                                                                                                                                                                                                                                                                                                                                                                                                                                                                            |                                                                |                                                                                                                                                                                                                                                                                                                                                                                                                                                                                                                                                                                                                                                                                                                                                                                                                                                                                                                                                       |                                                                                                                                                                                                                                                                                                                                                                                                                                                                                                                                                                                                                                                                                                                                                                                                                                                                                                |    |                                                                                                                                                                                                                                                                                                                                                                                                                                                                                                                                                                                                                                                                                                                                                                                                                                                                                  |                                                                                   |                                                                  |                                                                                                                                                                                                                                |
|----------------------------------------------|-------------------------------------------------------------------------------------|------|-------------------------------------------------------|-------------------|--------------------------------------|----------------------------------------|--------------------------------------|--------------------------------------------------------------------------------------------------------------|----------------------------------------------------------------------------------------------------------|----------------------------------------------------------------------------------------------------------------------------------------------------------------------------------------------------------------------------------------------------------------------------------------------------------------------------------------------------------------------------------------------------------------------------------------------------------------------------------------------------------------------------------------------------------------------------------------------------------------------------|----------------------------------------------------------------|-------------------------------------------------------------------------------------------------------------------------------------------------------------------------------------------------------------------------------------------------------------------------------------------------------------------------------------------------------------------------------------------------------------------------------------------------------------------------------------------------------------------------------------------------------------------------------------------------------------------------------------------------------------------------------------------------------------------------------------------------------------------------------------------------------------------------------------------------------------------------------------------------------------------------------------------------------|------------------------------------------------------------------------------------------------------------------------------------------------------------------------------------------------------------------------------------------------------------------------------------------------------------------------------------------------------------------------------------------------------------------------------------------------------------------------------------------------------------------------------------------------------------------------------------------------------------------------------------------------------------------------------------------------------------------------------------------------------------------------------------------------------------------------------------------------------------------------------------------------|----|----------------------------------------------------------------------------------------------------------------------------------------------------------------------------------------------------------------------------------------------------------------------------------------------------------------------------------------------------------------------------------------------------------------------------------------------------------------------------------------------------------------------------------------------------------------------------------------------------------------------------------------------------------------------------------------------------------------------------------------------------------------------------------------------------------------------------------------------------------------------------------|-----------------------------------------------------------------------------------|------------------------------------------------------------------|--------------------------------------------------------------------------------------------------------------------------------------------------------------------------------------------------------------------------------|
| David Chadwick, Robert Kinsman, Peter Walton | The British Association of Endocrine and Thyroid Surgeons 4th National Audit Report | 2012 | UK Registry of Endocrine and Thyroid Surgery (UKRETS) | Endocrine Surgery | National Cancer Intelligence Network | BAETS and Dendrite manage the registry | To ensure high quality surgical care | Dendrite build, maintain and host the registry. They also provide the data analysis and publish the reports. | Sponsorship by Covidien since 2011 and ongoing. Ethicon Endo-Surgery provided the initial start up funds | Demographics, indication for surgery, diagnosis, other lesions (left/right), date of operation, histology, use of fine needle aspiration, length of stay, complications, imaging, use of nerve monitor, use of harmonic scalpel, use of ligasure, pre-operative imaging, use of MDT, use of laryngoscopy, grade of surgeon, grade of assistant, consultant involvement, post operative vocal cord assessment, procedure information, type of approach (posterior, endoscopic, open, transperitoneal etc), energy source (bi/monopolar), re-operation, only patient comments and surgeon comments are in white space format | Electronic data collection. Dendrite involved in data analysis | Participating in the UKRETS is an obligatory requirement for BAETS Full Members. It is a requirement of HQIP that all thyroid operations are entered onto UKRETS as thyroid surgery has been chosen by the Chief Medical Officer to be one of 13 specialties where consultant level outcomes should be openly available for public viewing. The registry facilitates appraisal and revalidation process. Surgeons get personal results. Having mandatory fields will make it impossible to log off without completion. Making data submission compulsory for membership will also increase data completion. Other methods to improve data entry include: publishing of members' rates of complete data; identification of those high-volume surgeons with high rates of complete data, with a view to sharing their methodology for successful and comprehensive data acquisition; prevent cases being logged until certain basic fields are complete | The report has outcomes of 29,000 surgical procedures. There was enormous variation between individual surgeons with respect to their rate of missing data. Some achieved well above average rates of data completeness, some at or close to 100% complete. Others, however, have high rates of incomplete entries, occasionally close to zero percent. The variation did not appear to be due to surgeon-volume, with many of the highest volume surgeons represented amongst the enthusiasts, despite the larger number of cases requiring data entry. Audit fatigue over time also does not appear to explain this divergence, as rates of incomplete data entry are stable over the last 5-6 years. However, data entry for outcomes at follow-up is less complete than for outcomes at discharge, reflecting the increased effort required to obtain these data and update the case entry | NS | It is a purely a surgical database, so that data on for instance adjuvant therapies for thyroid cancer or for tumours not undergoing surgery are not collected. The majority of thyroidectomies in the United Kingdom are performed by non-BAETS members, and therefore are not recorded in our audit. There is considerable variation between members in completeness of data entry - this variation, and the level of missing data overall, has the potential to compromise assessment of surgical outcomes. There was considerable missing data for all endocrine case types. For thyroidectomy for examples, even the most basic data that would allow simple calculation of complication rates were missing in over 10% of cases on average. Other data fields have even higher proportions of incomplete data entry. This is similar to parathyroid and adrenal data entry | Facilitate appraisal and revalidation process, surgeons will get personal results | Success of registry is dependent on it's members to submit data. | Access to UKRETS is granted on Full Membership of BAETS. Surgeons can then access the registry to enter details of all endocrine operations. Access to data for research requires a formal application and peer review process |
|----------------------------------------------|-------------------------------------------------------------------------------------|------|-------------------------------------------------------|-------------------|--------------------------------------|----------------------------------------|--------------------------------------|--------------------------------------------------------------------------------------------------------------|----------------------------------------------------------------------------------------------------------|----------------------------------------------------------------------------------------------------------------------------------------------------------------------------------------------------------------------------------------------------------------------------------------------------------------------------------------------------------------------------------------------------------------------------------------------------------------------------------------------------------------------------------------------------------------------------------------------------------------------------|----------------------------------------------------------------|-------------------------------------------------------------------------------------------------------------------------------------------------------------------------------------------------------------------------------------------------------------------------------------------------------------------------------------------------------------------------------------------------------------------------------------------------------------------------------------------------------------------------------------------------------------------------------------------------------------------------------------------------------------------------------------------------------------------------------------------------------------------------------------------------------------------------------------------------------------------------------------------------------------------------------------------------------|------------------------------------------------------------------------------------------------------------------------------------------------------------------------------------------------------------------------------------------------------------------------------------------------------------------------------------------------------------------------------------------------------------------------------------------------------------------------------------------------------------------------------------------------------------------------------------------------------------------------------------------------------------------------------------------------------------------------------------------------------------------------------------------------------------------------------------------------------------------------------------------------|----|----------------------------------------------------------------------------------------------------------------------------------------------------------------------------------------------------------------------------------------------------------------------------------------------------------------------------------------------------------------------------------------------------------------------------------------------------------------------------------------------------------------------------------------------------------------------------------------------------------------------------------------------------------------------------------------------------------------------------------------------------------------------------------------------------------------------------------------------------------------------------------|-----------------------------------------------------------------------------------|------------------------------------------------------------------|--------------------------------------------------------------------------------------------------------------------------------------------------------------------------------------------------------------------------------|

For peer review only

1  
2  
3  
4  
5  
6  
7  
8  
9  
10  
11  
12  
13  
14  
15  
16  
17  
18  
19  
20  
21  
22  
23  
24  
25  
26  
27  
28  
29  
30  
31  
32  
33  
34  
35  
36  
37  
38  
39  
40  
41  
42  
43  
44  
45  
46  
47

1  
2  
3  
4  
5  
6  
7  
8  
9  
10  
11  
12  
13  
14  
15  
16  
17  
18  
19  
20  
21  
22  
23  
24  
25  
26  
27  
28  
29  
30  
31  
32  
33  
34  
35  
36  
37  
38  
39  
40  
41  
42  
43  
44  
45  
46  
47

|                                                 |                                                                      |             |                                                                             |                                                 |                                                                                                                                                          |                                                                                                                                                                                                                                                                                                                                                                                                                                                                                                                     |                                                                                                                                                                                                                                                                                                                                                                                                                                                              |           |                                                                                                           |                 |                                                                                                                                                                                                                                                                                                                                                                                                                     |                                                                                                                                                                                                                                                                                                                                                                                                                                                                                                                                                                                                                                                                                                |                                                                                                                                                              |                                                                                                                            |                                                                                                                                                                                                                                                                                                                                                                                                                                                                                                                                                     |           |           |                                                                                                                                                                    |           |                                                                                                                              |
|-------------------------------------------------|----------------------------------------------------------------------|-------------|-----------------------------------------------------------------------------|-------------------------------------------------|----------------------------------------------------------------------------------------------------------------------------------------------------------|---------------------------------------------------------------------------------------------------------------------------------------------------------------------------------------------------------------------------------------------------------------------------------------------------------------------------------------------------------------------------------------------------------------------------------------------------------------------------------------------------------------------|--------------------------------------------------------------------------------------------------------------------------------------------------------------------------------------------------------------------------------------------------------------------------------------------------------------------------------------------------------------------------------------------------------------------------------------------------------------|-----------|-----------------------------------------------------------------------------------------------------------|-----------------|---------------------------------------------------------------------------------------------------------------------------------------------------------------------------------------------------------------------------------------------------------------------------------------------------------------------------------------------------------------------------------------------------------------------|------------------------------------------------------------------------------------------------------------------------------------------------------------------------------------------------------------------------------------------------------------------------------------------------------------------------------------------------------------------------------------------------------------------------------------------------------------------------------------------------------------------------------------------------------------------------------------------------------------------------------------------------------------------------------------------------|--------------------------------------------------------------------------------------------------------------------------------------------------------------|----------------------------------------------------------------------------------------------------------------------------|-----------------------------------------------------------------------------------------------------------------------------------------------------------------------------------------------------------------------------------------------------------------------------------------------------------------------------------------------------------------------------------------------------------------------------------------------------------------------------------------------------------------------------------------------------|-----------|-----------|--------------------------------------------------------------------------------------------------------------------------------------------------------------------|-----------|------------------------------------------------------------------------------------------------------------------------------|
| <p>National Bowel Cancer Audit Project Team</p> | <p>National Bowel Cancer Audit Report</p>                            | <p>2015</p> | <p>National Bowel Cancer Audit</p>                                          | <p>Colon and rectal cancer.</p>                 | <p>Health &amp; Social Care Information Centre, Association of Coloproctology of Great Britain and Ireland, and the Royal College of Surgeons, HQUIP</p> | <p>Leadership from the National Bowel Cancer Audit Project Board. The Health and Social Care Information Centre provides project management and technical infrastructure, while the ACPGBI provides clinical leadership and direction. The audit was carried out by the Clinical Effectiveness Unit (CEU) of the Royal College of Surgeons of England in partnership with the Association of Coloproctologists of Great Britain and Ireland (ACPGBI), and the Health and Social Care Information Centre (HSCIC)</p> | <p>To improve the quality of care and survival of patients with bowel cancer, and meets the requirements as set out in the NHS cancer plan, NICE guidelines and the report of the Bristol Royal Infirmary inquiry. To provide more information on the prevention, diagnosis, treatment and care of this disease and the outcomes. Audit's overall aim is to measure the quality of care and survival of patients with bowel cancer in England and Wales.</p> | <p>NS</p> | <p>Funding by the HQIP as part of the National Clinical Audit and Patient Outcomes Programme (NCAPOP)</p> | <p>BMJ Open</p> | <p>Demographics, date of diagnosis, organisation first seen, source of referral, major site of cancer, performance status, synchronous cancer, planned cancer treatment type, reason for no treatment, TNM category, ASA, monitoring, curability, surgical urgency, primary procedure, surgical access, immediate post-operative care, status of excision margin, treatment modality (all have drop down lists)</p> | <p>All participating trusts submit their data via the Clinical Audit Platform. The Welsh data is submitted directly from the Cancer Network Information System Cymru to the Clinical Audit Platform. The analyses for the report was carried out by the Clinical Effectiveness Unit of the Royal College of Surgeons of England with support from the Health and Social Care Information Centre. The Audit dataset is linked to HES data at the patient level to obtain further information on patient care and follow-up, such as stoma reversal and emergency readmissions in England. HES is useful for analysing patient follow-up, such as emergency readmissions and stoma provision</p> | <p>The dataset has been redesigned to contain fewer items, some of which are mandatory, with the aim of improving data completeness across all patients.</p> | <p>This audit includes data on over 30,000 patients diagnosed with bowel cancer between 1 April 2013 and 31 March 2014</p> | <p>Annual audit reports. The Audit publishes data at the individual surgeon level in terms of 90 day post-operative mortality for patients undergoing elective/scheduled major surgery after being diagnosed with bowel cancer. Also publish the number of procedures performed by each surgeon. The Audit data collection system has the facility to provide feedback to consultants and Trusts about the data they have submitted. Most results are descriptive and are presented in simple tables with percentages of patients in each group</p> | <p>NS</p> | <p>NS</p> | <p>NS</p>                                                                                                                                                          | <p>NS</p> | <p>Data protection and privacy is an important part of the Audit. No individual patient can be identified in the results</p> |
| <p>The Ear Foundation</p>                       | <p>The UK National Registry for Bone Conducting Hearing Implants</p> | <p>2015</p> | <p>The UK National Registry for Bone Conducting Hearing Implants (BCHI)</p> | <p>Bone Conduction Hearing Implant Registry</p> | <p>13 centres performing BCHI</p>                                                                                                                        | <p>Ear Foundation</p>                                                                                                                                                                                                                                                                                                                                                                                                                                                                                               | <p>To identify the number of BCHI nationwide and eventually worldwide, to secure funding for BCHIs, to inform policy and practice, to help plan services.</p>                                                                                                                                                                                                                                                                                                | <p>NS</p> | <p>Supported by Oticon Medical and Cochlear Europe</p>                                                    | <p>NS</p>       | <p>Demographics, unilateral/bilateral hearing loss, unilateral/bilateral fitting of BCHI, aetiology of hearing loss. Will include usage and indications for BCHI</p>                                                                                                                                                                                                                                                | <p>Data is sent by the participating centre to The Ear Foundation.</p>                                                                                                                                                                                                                                                                                                                                                                                                                                                                                                                                                                                                                         | <p>NS</p>                                                                                                                                                    | <p>Number of users is 3104</p>                                                                                             | <p>Website report</p>                                                                                                                                                                                                                                                                                                                                                                                                                                                                                                                               | <p>NS</p> | <p>NS</p> | <p>Provides outcomes data and can provide evidence of clinical cost-effectiveness. It can help secure funding of BCHIs. It can help inform policy and practice</p> | <p>NS</p> | <p>All data are securely stored and kept confidential</p>                                                                    |

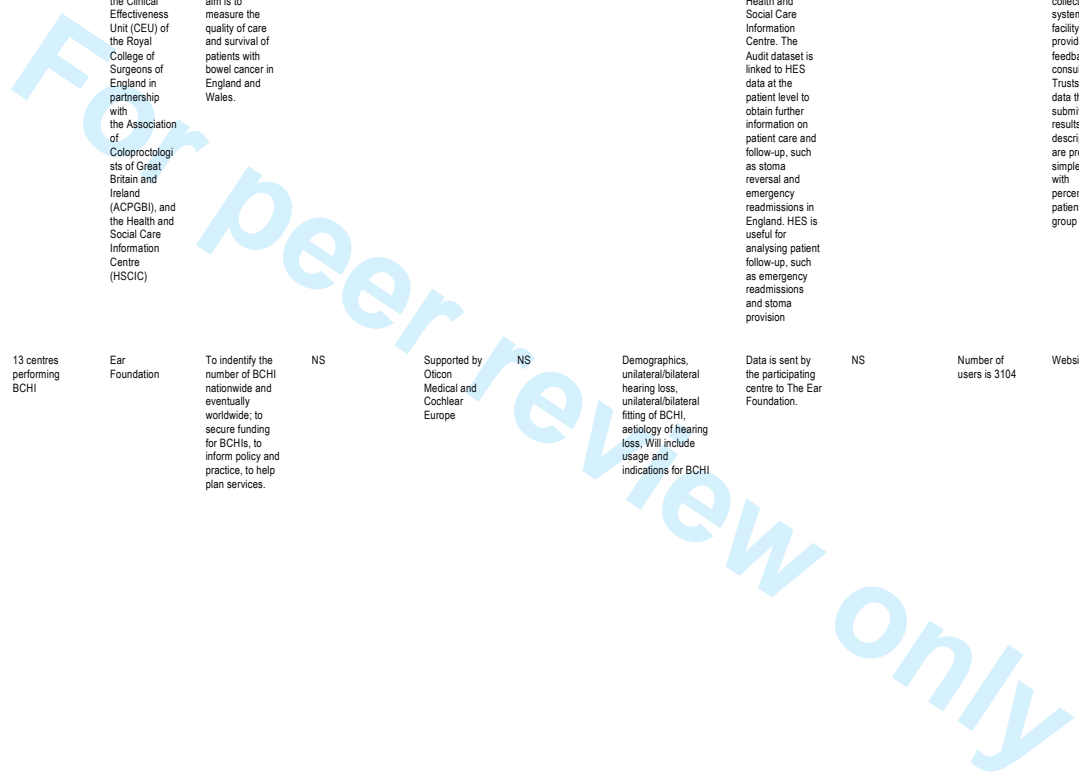

|                        |                                                                                                       |      |                                   |                                   |                                                                                                                                                                                                                                                                                                                                             |                     |                                                                                                                                                                                                                                            |                                                                                                      |    |          |                                                                                                                                                                                                                                                                                                                                                                    |    |                                                                                                                                                                                                                                                                                                                                                                                                                                                                                                                                                                                                                                                                                                                                                                                                                                                                                                                                                                                                                                                                                                                                                                                                                                                                                                                                                                                                                                                                                                                                                                                                                       |    |    |                                                                                                                                                                                                                                                                                                                                                                                                                                                                                 |    |                                                                                                                                                                                                                     |    |                                                                                                                                                                                                                                                                                                                                                                                                                                                                                                                                                                                                                                                              |
|------------------------|-------------------------------------------------------------------------------------------------------|------|-----------------------------------|-----------------------------------|---------------------------------------------------------------------------------------------------------------------------------------------------------------------------------------------------------------------------------------------------------------------------------------------------------------------------------------------|---------------------|--------------------------------------------------------------------------------------------------------------------------------------------------------------------------------------------------------------------------------------------|------------------------------------------------------------------------------------------------------|----|----------|--------------------------------------------------------------------------------------------------------------------------------------------------------------------------------------------------------------------------------------------------------------------------------------------------------------------------------------------------------------------|----|-----------------------------------------------------------------------------------------------------------------------------------------------------------------------------------------------------------------------------------------------------------------------------------------------------------------------------------------------------------------------------------------------------------------------------------------------------------------------------------------------------------------------------------------------------------------------------------------------------------------------------------------------------------------------------------------------------------------------------------------------------------------------------------------------------------------------------------------------------------------------------------------------------------------------------------------------------------------------------------------------------------------------------------------------------------------------------------------------------------------------------------------------------------------------------------------------------------------------------------------------------------------------------------------------------------------------------------------------------------------------------------------------------------------------------------------------------------------------------------------------------------------------------------------------------------------------------------------------------------------------|----|----|---------------------------------------------------------------------------------------------------------------------------------------------------------------------------------------------------------------------------------------------------------------------------------------------------------------------------------------------------------------------------------------------------------------------------------------------------------------------------------|----|---------------------------------------------------------------------------------------------------------------------------------------------------------------------------------------------------------------------|----|--------------------------------------------------------------------------------------------------------------------------------------------------------------------------------------------------------------------------------------------------------------------------------------------------------------------------------------------------------------------------------------------------------------------------------------------------------------------------------------------------------------------------------------------------------------------------------------------------------------------------------------------------------------|
| Hazari A.<br>Walton P. | The UK National Flap Registry (UKNFR): A National Database for all pedicled and free flaps in the UK. | 2015 | UK National Flap Registry (UKNFR) | Pedicled and free flap operations | British Association of Plastic Reconstructive and Aesthetic Surgeons (BAPRAS), British Association of Head and Neck Oncologists (BAHNO), British Association of Oral and Maxillofacial Surgeons (BAOMS) and Association of Breast Surgery (ABS). Supported by Prof Danny Keenan, Medical Director of HQIP and a practicing cardiac surgeon. | Managed by Dendrite | To collect information on all free and major pedicled flap reconstructions for the Head & Neck, Breast, Upper & Lower Limb, Perineum and Trunk carried out in the UK and through this, assess the quality of care we provide for patients. | The registry is multi-browser and will work on Safari, Google Chrome, Firefox, and Internet Explorer | NS | BMJ Open | A free text box is available in the operation section for additional operation notes. Operative details. Length of stay. Postop chemo, postop radiotherapy, ITU admission (unplanned/ planned), date of discharge, and unplanned re-admission to hospital. Patient Reported Outcome Measures (PROMs) are being collected for Breast and Lower Limb Reconstructions | NS | There are time-triggered PROMs questionnaires being sent directly to the patient via an automated text/ email app and collated centrally, removing the human interface. Keep it as simple as possible for surgeons to use and keep it quick. The UKNFR notes that there is a learning curve speed to entering the data, and initially testers found the first few flaps data entry to take longer than 15-20 min. Once a user conducts a dozen cases or more then the system should become much more familiar only take you a few minutes. It is useful for surgeons - they can use the data for appraisal and revalidation. Outcomes, including PROMs, are high on the NHS agenda; revalidation, robust appraisal and transparency will make such data essential for an individual surgeon as well as for the hospital, and UKNFR will be a powerful resource to deliver this data. The registry is multi-browser and will work on Safari, Google Chrome, Firefox, and Internet Explorer - this makes it easier for the registry to be used. The registry can be accessed on an iPad in a secure and quick manner - the UKNFR is completely tablet device compatible. All incomplete data are highlighted by a yellow triangle and when this is clicked it takes you straight to the field that needs to be completed. The patient record list uses a 'traffic-light' system: an amber background colour indicates incomplete data, green is complete data and red, which is a rare event, will indicate that a patient has died perioperatively. An amber background colour will persist until mandatory fields are | NS | NS | Patient Reported Outcome Measures (PROMs) are being collected for Breast and Lower Limb Reconstructions, with time-triggered questionnaires being sent directly to the patient via an automated text/ email app and collated centrally, removing the human interface. For Breast surgery, three BreastQ Reconstructive modules: satisfaction with outcome, satisfaction with information and satisfaction with breast, will be sent directly to the patient at 6 and 12 months. | NS | The data can be used by surgeons for appraisal and revalidation as required by the General Medical Council. The registry will allow appropriate comparison of clinical performance with national and regional peers | NS | The registry requires the entry of patient confidential information. Once these are approved, it means that the user will not have to ask for consent from patients to enter personal confidential information into UKNFR, such as name, date of birth. Until these are granted, written consent must be taken from each patient. For collation at a national level, all personal information is anonymised so that patients cannot be identified. User must accept the Terms of Conditions and privacy policy when you first register. UKNFR has a 'secure' server, which automatically encrypts data traffic between the server and the 'client' computers |
|------------------------|-------------------------------------------------------------------------------------------------------|------|-----------------------------------|-----------------------------------|---------------------------------------------------------------------------------------------------------------------------------------------------------------------------------------------------------------------------------------------------------------------------------------------------------------------------------------------|---------------------|--------------------------------------------------------------------------------------------------------------------------------------------------------------------------------------------------------------------------------------------|------------------------------------------------------------------------------------------------------|----|----------|--------------------------------------------------------------------------------------------------------------------------------------------------------------------------------------------------------------------------------------------------------------------------------------------------------------------------------------------------------------------|----|-----------------------------------------------------------------------------------------------------------------------------------------------------------------------------------------------------------------------------------------------------------------------------------------------------------------------------------------------------------------------------------------------------------------------------------------------------------------------------------------------------------------------------------------------------------------------------------------------------------------------------------------------------------------------------------------------------------------------------------------------------------------------------------------------------------------------------------------------------------------------------------------------------------------------------------------------------------------------------------------------------------------------------------------------------------------------------------------------------------------------------------------------------------------------------------------------------------------------------------------------------------------------------------------------------------------------------------------------------------------------------------------------------------------------------------------------------------------------------------------------------------------------------------------------------------------------------------------------------------------------|----|----|---------------------------------------------------------------------------------------------------------------------------------------------------------------------------------------------------------------------------------------------------------------------------------------------------------------------------------------------------------------------------------------------------------------------------------------------------------------------------------|----|---------------------------------------------------------------------------------------------------------------------------------------------------------------------------------------------------------------------|----|--------------------------------------------------------------------------------------------------------------------------------------------------------------------------------------------------------------------------------------------------------------------------------------------------------------------------------------------------------------------------------------------------------------------------------------------------------------------------------------------------------------------------------------------------------------------------------------------------------------------------------------------------------------|

1  
2  
3  
4  
5  
6  
7  
8  
9  
10  
11  
12  
13  
14  
15  
16  
17  
18  
19  
20  
21  
22  
23  
24  
25  
26  
27  
28  
29  
30  
31  
32  
33  
34  
35  
36  
37  
38  
39  
40  
41  
42  
43  
44  
45  
46  
47

55

1  
2  
3  
4  
5  
6  
7  
8  
9  
10  
11  
12  
13  
14  
15  
16  
17  
18  
19  
20  
21  
22  
23  
24  
25  
26  
27  
28  
29  
30  
31  
32  
33  
34  
35  
36  
37  
38  
39  
40  
41  
42  
43  
44  
45  
46  
47

|                                                                                                                                       |                                                                                                                        |              |                                                           |                                    |                                                                                                                                                                                                                                                                |                                                                                                                                                                                                                                                                                                                                                                 |                                                                                                                                                                                                                            |                                                                                                                                                         |                                                                                                                                                                                                                                                                                                                                                                                                                                                                                                                                                                                           |                                                                                                                                                                                                                                                               |                                                                                                                                                                                                                                                                                                                                                    |                                                                                                                                                                                                                                                                                                                                                                                                                                                                                                                                                                                                                         |                                                                                                                                                                                                                                                    |                                                                                                  |                                                                                                                                                                                                   |                                                                                                                             |                                                                                                                                                                                                                                                                                                                                                                                                                                                                                                                                                                                                                                                                                                                                                                                                                                                     |                                                                                    |                                                                                                                                                                                                                                                                                                                                                                                                                                                                                                                                                                                                                                                                                                                                                                                                                                                         |
|---------------------------------------------------------------------------------------------------------------------------------------|------------------------------------------------------------------------------------------------------------------------|--------------|-----------------------------------------------------------|------------------------------------|----------------------------------------------------------------------------------------------------------------------------------------------------------------------------------------------------------------------------------------------------------------|-----------------------------------------------------------------------------------------------------------------------------------------------------------------------------------------------------------------------------------------------------------------------------------------------------------------------------------------------------------------|----------------------------------------------------------------------------------------------------------------------------------------------------------------------------------------------------------------------------|---------------------------------------------------------------------------------------------------------------------------------------------------------|-------------------------------------------------------------------------------------------------------------------------------------------------------------------------------------------------------------------------------------------------------------------------------------------------------------------------------------------------------------------------------------------------------------------------------------------------------------------------------------------------------------------------------------------------------------------------------------------|---------------------------------------------------------------------------------------------------------------------------------------------------------------------------------------------------------------------------------------------------------------|----------------------------------------------------------------------------------------------------------------------------------------------------------------------------------------------------------------------------------------------------------------------------------------------------------------------------------------------------|-------------------------------------------------------------------------------------------------------------------------------------------------------------------------------------------------------------------------------------------------------------------------------------------------------------------------------------------------------------------------------------------------------------------------------------------------------------------------------------------------------------------------------------------------------------------------------------------------------------------------|----------------------------------------------------------------------------------------------------------------------------------------------------------------------------------------------------------------------------------------------------|--------------------------------------------------------------------------------------------------|---------------------------------------------------------------------------------------------------------------------------------------------------------------------------------------------------|-----------------------------------------------------------------------------------------------------------------------------|-----------------------------------------------------------------------------------------------------------------------------------------------------------------------------------------------------------------------------------------------------------------------------------------------------------------------------------------------------------------------------------------------------------------------------------------------------------------------------------------------------------------------------------------------------------------------------------------------------------------------------------------------------------------------------------------------------------------------------------------------------------------------------------------------------------------------------------------------------|------------------------------------------------------------------------------------|---------------------------------------------------------------------------------------------------------------------------------------------------------------------------------------------------------------------------------------------------------------------------------------------------------------------------------------------------------------------------------------------------------------------------------------------------------------------------------------------------------------------------------------------------------------------------------------------------------------------------------------------------------------------------------------------------------------------------------------------------------------------------------------------------------------------------------------------------------|
| <p>Conroy S.S.<br/>Rochester M.A.</p>                                                                                                 | <p>Nephroureterecto my surgery in the UK in 2012: British Association of Urological Surgeons (BAUS) Registry data.</p> | <p>201 5</p> | <p>BAUS Registry data for Nephroureterecto my surgery</p> | <p>Nephroureterecto my surgery</p> | <p>BAUS, Nuvola BAUS</p>                                                                                                                                                                                                                                       | <p>To respond to the government initiative for the compulsory reporting of surgeon-specific outcomes for surgery, the BAUS required urologists performing any nephrectomy surgery in England to enter their data for all such surgery. To provide an accurate description of current practice to facilitate audit of individual surgeon and centre outcomes</p> | <p>Data entry was invited from all urologists within the UK. Data were entered by each individual surgeon's team to a web-based database tool established by the BAUS Section of Oncology and commissioned from Nuvola</p> | <p>Funding from Nuvola</p>                                                                                                                              | <p><b>BMJ Open</b><br/>Basic demographic details; 59 patient-specific parameters were included</p>                                                                                                                                                                                                                                                                                                                                                                                                                                                                                        | <p>Registry data entered by each individual surgeon's team. Before any formal analysis, a process of 'data cleansing' was undertaken centrally by a BAUS committee to address inconsistencies between the listed surgery and the preoperative indication.</p> | <p>A few of the data items were mandatory, but there was no obligation to provide complete data. Collected data was under the following themes: (i) Presentation and indication; (ii) Diagnosis and co-morbidity; (iii) Stage of malignancy; (iv) Surgeon; (v) Details of procedure; (vi) Outcome and complications; and (vii) Histopathology.</p> | <p>Entry of data to the database was made available to all urologists within the UK. 6042 nephrectomy surgeries reported to BAUS in 2012. there is no requirement for urologists in England to have membership of BAUS, there is no other similar national organisation within the UK. It is thought that the data for nephrectomy surgery gathered by the BAUS encompasses &gt;80% of all such surgery performed in the UK in 2012, representing a substantial strength of the present publication.</p>                                                                                                                | <p>Annual Reports</p>                                                                                                                                                                                                                              | <p>NS</p>                                                                                        | <p>Some cases performed within the private healthcare system may have eluded reporting in this dataset, but there is no reasonable evidence to suggest that this introduced significant bias.</p> | <p>The registry offers considerable insight into current practice patterns surrounding NU surgery within the UK in 2012</p> | <p>NS</p>                                                                                                                                                                                                                                                                                                                                                                                                                                                                                                                                                                                                                                                                                                                                                                                                                                           | <p>Access to this database was provided by the BAUS and was password protected</p> |                                                                                                                                                                                                                                                                                                                                                                                                                                                                                                                                                                                                                                                                                                                                                                                                                                                         |
| <p>Caskey F. Castledine C. Dawnay A. Farrington K. Fogarty D. Fraser S. Kumwenda M. MacPhee I. Sinha MD. Steenkamp R. Williams AJ</p> | <p>UK Renal Registry - Eighteenth Annual Report</p>                                                                    | <p>201 5</p> | <p>UK Renal Registry</p>                                  | <p>Renal surgery</p>               | <p>Renal Association, The Scottish Renal Registry, The British Association of Paediatric Nephrology, PatientView, The UK Registry for Rare Kidney Diseases (RadKa), The Northern Ireland Paediatric Nephrology Forum and The Welsh Renal Clinical Network.</p> | <p>The UKRR reports directly into the Renal Information Governance Board (RIGB) of the Renal Association. From the beginning, the management committee had representatives from the British Association of Paediatric Nephrologists (BAPN), the British Transplant Society (BTS), the Scottish Renal Registry (SRR) and patient organisations.</p>              | <p>To facilitate improvements in patient care by auditing against national standards and supporting research, innovation and quality improvement.</p>                                                                      | <p>The UK Renal Registry (UKRR) was established by the Renal Association in 1995 as a resource for the development of patient care in renal disease</p> | <p>Initially funded by the Department of Health and industry (1995), but within two years was financially independent of both. It is now principally funded through an annual capitation fee levied on renal replacement therapy (RRT) patients; this currently (2016) stands at £27.50 per patient in England and £22.50 in Wales and Northern Ireland, levied as separate fees for the UKRR and PatientView on dialysis and transplant patients; some projects and collaborations receive funding through linkages with other organisations or grants for research and development.</p> | <p>The idea of the dataset is to give a complete picture of every renal patient-demographics, comorbidity, test results, renal replacement therapy (RRT) and medication</p>                                                                                   | <p>The idea of the dataset is to give a complete picture of every renal patient-demographics, comorbidity, test results, renal replacement therapy (RRT) and medication</p>                                                                                                                                                                        | <p>Data are collected on a quarterly basis via an automatic download from renal unit databases. Work with partners to ensure accurate extraction of data from NHS IT systems. They work with academics and others to ensure analysis is robust and accurate. Ensuring quality assurance and quality improvement is built into all aspects of the registry. The registry can capture real-time data from renal centres. The UKRR and the Health and Social Care Information Centre (HSCIC) have agreed that there could be considerable benefits for patients from routine linkage with Hospital Episode Statistics.</p> | <p>High quality clinical databases open to requests from researchers. Participation is mandated in England through the NHS National Service Specification and the Chief Executive of each Trust is responsible for adherence to this contract.</p> | <p>UKRR collects, analyses and reports on data from 71 adult and 13 paediatric renal centres</p> | <p>Annual reports in a form that are easily accessible to patients, clinicians, commissioners, policy makers and anyone with an interest in renal disease.</p>                                    | <p>NS</p>                                                                                                                   | <p>Registries can improve the health of the population in many ways. Their data can be used to generate and refine hypotheses that require testing, to inform optimal study design, to provide the evidence of need for the research to help secure funding, to provide an efficient framework for sampling and data collection in trials, to track changes in practice and finally and most importantly to monitor changes in population health outcomes. The registry is able to support an efficient randomised controlled trial (SIMPLIFIED) by providing daily feeds of laboratory data and securely destroyed at the end of the agreed period. The UKRR operates within a comprehensive governance framework which concerns data handling, reporting and research, including data linkages and sharing agreements. The UKRR has temporary</p> | <p>NS</p>                                                                          | <p>The UK Renal Registry is part of the Renal Association, a not for profit organisation registered with the Charity Commission. They try to ensure that all data are extracted, stored and used in line with good information governance and Caldicott principles. Permissions for the UKRR to undertake research and linkage with data have had to be established and it has become clear that research ethics approval is needed for all work that is not audit or quality assurance. The registry approves a number of requests for data sharing. Data are shared for specific analyses only and securely destroyed at the end of the agreed period. The UKRR operates within a comprehensive governance framework which concerns data handling, reporting and research, including data linkages and sharing agreements. The UKRR has temporary</p> |

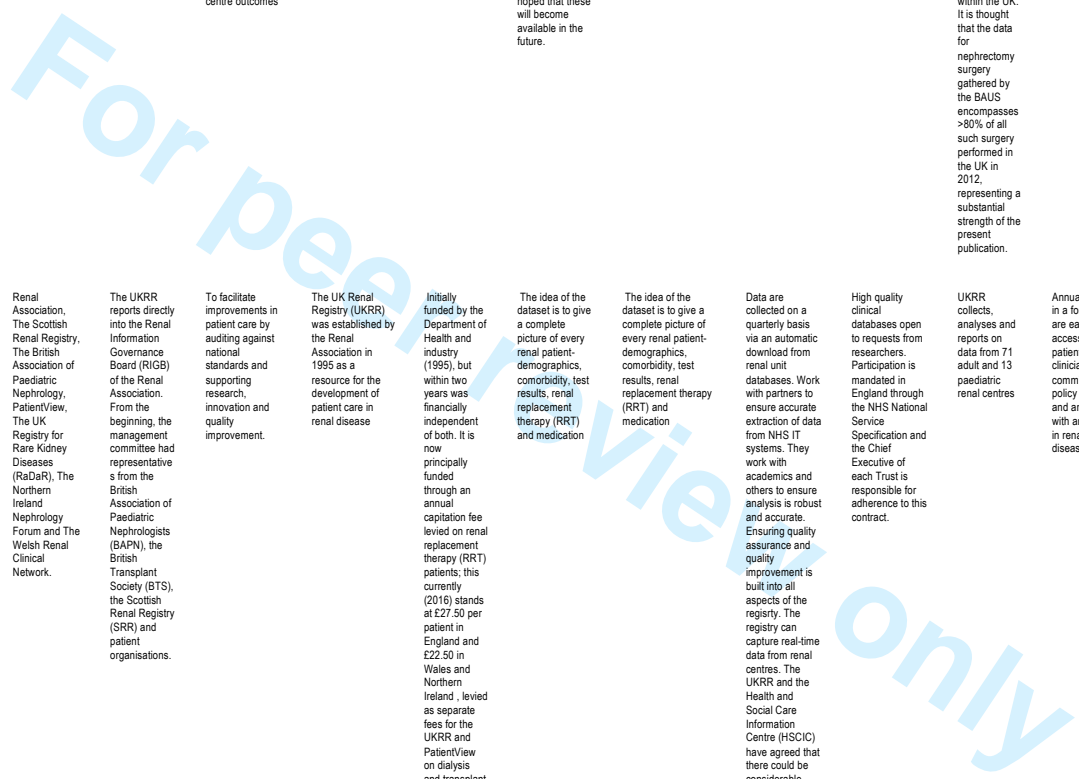

Support the UK in issues relating to information governance and patient consent; Use personal networks to spread awareness of the UKRR and its work with the council; Occasionally represent the Patient Council and the UKRR at other external meetings.

mortality. In the last year the registry has been a co-applicant on four grant applications

granted by the Secretary of State for Health under section 251 of The National Health Service Act (2006), to hold patient identifiable data. This exemption is reviewed annually. The UKRR has successfully completed the Connecting for Health information governance toolkit to a satisfactory standard

|               |                                                                                                                      |      |                         |             |    |    |                                                                                                                |    |    |    |    |                                                                                                                                                                                                                                                                                                                                                                                                                                                                                                                                                                                                                                                                                                                         |    |                                                                                                                                                                                                                                                                                                                                                                                                                                                                                                                                                                                                                                                                                                      |    |    |    |                                                                                                      |    |    |  |  |
|---------------|----------------------------------------------------------------------------------------------------------------------|------|-------------------------|-------------|----|----|----------------------------------------------------------------------------------------------------------------|----|----|----|----|-------------------------------------------------------------------------------------------------------------------------------------------------------------------------------------------------------------------------------------------------------------------------------------------------------------------------------------------------------------------------------------------------------------------------------------------------------------------------------------------------------------------------------------------------------------------------------------------------------------------------------------------------------------------------------------------------------------------------|----|------------------------------------------------------------------------------------------------------------------------------------------------------------------------------------------------------------------------------------------------------------------------------------------------------------------------------------------------------------------------------------------------------------------------------------------------------------------------------------------------------------------------------------------------------------------------------------------------------------------------------------------------------------------------------------------------------|----|----|----|------------------------------------------------------------------------------------------------------|----|----|--|--|
| Sabah S.A.    | Are all metal-on-metal hip revision operations contributing to the National Joint Registry implant survival curves?. | 2016 | National Joint Registry | Hip surgery | NS | NS | To examine the data quality of the NJR and to validate data quality on metal-on-metal hip revision procedures. | NS | NS | NS | NS | This study showed that only one third of retrieved components at the London Implant Retrieval Centre, contributed to survival curves on the NJR, this suggests that current NJR data on failure rates may be vulnerable to missing data. The most likely explanation for this appears to be the poor rate of consent, compliance and linkability during the early years of the NJR. The authors recommend that the NJR provide outcome data only for the periods where it has achieved excellent data collection. They also advocate for registry, retrieval linkage to become an integral component of the NJR Data Quality Strategy - this would enable feedback on errors and missing data and improve data quality. | NS | This study showed that only one third of retrieved components at the London Implant Retrieval Centre, contributed to survival curves on the NJR, this suggests that current NJR data on failure rates may be vulnerable to missing data. The most likely explanation for this appears to be the poor rate of consent, compliance and linkability during the early years of the NJR. They found that for the procedures the NJR did record, data quality was excellent. There was no missing data for surgical unit, date of revision, procedure type and implant side. This reflects the engagement from surgeons and Hospital Data Managers and the high quality of the NJR database infrastructure | NS | NS | NS | Large data sets are very helpful for planning provision of health care and to study disease patterns | NS | NS |  |  |
| Henckel J.    |                                                                                                                      |      |                         |             |    |    |                                                                                                                |    |    |    |    |                                                                                                                                                                                                                                                                                                                                                                                                                                                                                                                                                                                                                                                                                                                         |    |                                                                                                                                                                                                                                                                                                                                                                                                                                                                                                                                                                                                                                                                                                      |    |    |    |                                                                                                      |    |    |  |  |
| Koutsouris S. |                                                                                                                      |      |                         |             |    |    |                                                                                                                |    |    |    |    |                                                                                                                                                                                                                                                                                                                                                                                                                                                                                                                                                                                                                                                                                                                         |    |                                                                                                                                                                                                                                                                                                                                                                                                                                                                                                                                                                                                                                                                                                      |    |    |    |                                                                                                      |    |    |  |  |
| Rajani R.     |                                                                                                                      |      |                         |             |    |    |                                                                                                                |    |    |    |    |                                                                                                                                                                                                                                                                                                                                                                                                                                                                                                                                                                                                                                                                                                                         |    |                                                                                                                                                                                                                                                                                                                                                                                                                                                                                                                                                                                                                                                                                                      |    |    |    |                                                                                                      |    |    |  |  |
| Hothi H.      |                                                                                                                      |      |                         |             |    |    |                                                                                                                |    |    |    |    |                                                                                                                                                                                                                                                                                                                                                                                                                                                                                                                                                                                                                                                                                                                         |    |                                                                                                                                                                                                                                                                                                                                                                                                                                                                                                                                                                                                                                                                                                      |    |    |    |                                                                                                      |    |    |  |  |
| Skinner J.A.  |                                                                                                                      |      |                         |             |    |    |                                                                                                                |    |    |    |    |                                                                                                                                                                                                                                                                                                                                                                                                                                                                                                                                                                                                                                                                                                                         |    |                                                                                                                                                                                                                                                                                                                                                                                                                                                                                                                                                                                                                                                                                                      |    |    |    |                                                                                                      |    |    |  |  |
| Hart A.J.     |                                                                                                                      |      |                         |             |    |    |                                                                                                                |    |    |    |    |                                                                                                                                                                                                                                                                                                                                                                                                                                                                                                                                                                                                                                                                                                                         |    |                                                                                                                                                                                                                                                                                                                                                                                                                                                                                                                                                                                                                                                                                                      |    |    |    |                                                                                                      |    |    |  |  |

1  
2  
3  
4  
5  
6  
7  
8  
9  
10  
11  
12  
13  
14  
15  
16  
17  
18  
19  
20  
21  
22  
23  
24  
25  
26  
27  
28  
29  
30  
31  
32  
33  
34  
35  
36  
37  
38  
39  
40  
41  
42  
43  
44  
45  
46  
47





statistically adjust for case-mix. Another factor is that surgical outcomes are not solely dependent on the consultant as other members of the operating team also contribute. It is thus important that team-level data are published as well to reflect the complex interplay of the multi-disciplinary team. The benefits of reporting patient outcomes seem to outweigh the disadvantages, and they should be published.

|              |                                                                                  |      |                        |                |                                                                                                                                 |                        |                                                                                                                                                                                                       |                                                                                                                                                                                                                                                                                                                             |                                                                                                                                                      |                                                                                                                                                                                                                                                                                                                                               |                                                                                                                                                                                                                         |                                                                                                                                                                                                                                                                                                                                                                                                                                                                                                                                                                                                     |                                                                                                                                                                                                                                                                                                                                                                                                                                                                                                                                                                                                                                                                                                                                                                                                                                                                                                                                                                                                                                    |                                                                                                                                                                                                                                                                                                                                                                                                                                                                                        |    |                                                                                                                                                                                                                                                   |                                                                                                                                                                                                                                                                                                                                                                                                                                                                                                                                                                                                                                                                                                                                                                                                                                                                                                                                                      |                                                                                                                                                                                                                                                                                                                                                                                                                                                                                                                                                                                                                                                                               |                                                                                                                                                                                                                                                                                                   |                                                                                                                                                                                                                                                                    |
|--------------|----------------------------------------------------------------------------------|------|------------------------|----------------|---------------------------------------------------------------------------------------------------------------------------------|------------------------|-------------------------------------------------------------------------------------------------------------------------------------------------------------------------------------------------------|-----------------------------------------------------------------------------------------------------------------------------------------------------------------------------------------------------------------------------------------------------------------------------------------------------------------------------|------------------------------------------------------------------------------------------------------------------------------------------------------|-----------------------------------------------------------------------------------------------------------------------------------------------------------------------------------------------------------------------------------------------------------------------------------------------------------------------------------------------|-------------------------------------------------------------------------------------------------------------------------------------------------------------------------------------------------------------------------|-----------------------------------------------------------------------------------------------------------------------------------------------------------------------------------------------------------------------------------------------------------------------------------------------------------------------------------------------------------------------------------------------------------------------------------------------------------------------------------------------------------------------------------------------------------------------------------------------------|------------------------------------------------------------------------------------------------------------------------------------------------------------------------------------------------------------------------------------------------------------------------------------------------------------------------------------------------------------------------------------------------------------------------------------------------------------------------------------------------------------------------------------------------------------------------------------------------------------------------------------------------------------------------------------------------------------------------------------------------------------------------------------------------------------------------------------------------------------------------------------------------------------------------------------------------------------------------------------------------------------------------------------|----------------------------------------------------------------------------------------------------------------------------------------------------------------------------------------------------------------------------------------------------------------------------------------------------------------------------------------------------------------------------------------------------------------------------------------------------------------------------------------|----|---------------------------------------------------------------------------------------------------------------------------------------------------------------------------------------------------------------------------------------------------|------------------------------------------------------------------------------------------------------------------------------------------------------------------------------------------------------------------------------------------------------------------------------------------------------------------------------------------------------------------------------------------------------------------------------------------------------------------------------------------------------------------------------------------------------------------------------------------------------------------------------------------------------------------------------------------------------------------------------------------------------------------------------------------------------------------------------------------------------------------------------------------------------------------------------------------------------|-------------------------------------------------------------------------------------------------------------------------------------------------------------------------------------------------------------------------------------------------------------------------------------------------------------------------------------------------------------------------------------------------------------------------------------------------------------------------------------------------------------------------------------------------------------------------------------------------------------------------------------------------------------------------------|---------------------------------------------------------------------------------------------------------------------------------------------------------------------------------------------------------------------------------------------------------------------------------------------------|--------------------------------------------------------------------------------------------------------------------------------------------------------------------------------------------------------------------------------------------------------------------|
| Breakwell LM | Should we all go to the PROM? The first two years of the British Spine Registry. | 2015 | British Spine Register | Spinal surgery | The British Association of Spine Surgeons, the British Scoliosis Society (BSS) and the Society of British Neurological Surgeons | BSR Steering Committee | The purpose of the BSR is to collate information on the current state of spinal surgery within the United Kingdom in order to identify areas of best practice and so facilitate improved patient care | The British Association of Spine Surgeons instituted the design, construction and rollout of the British Spine Registry. The BSR, built on the Amplitude platform, (Amplitude Clinical, Droitwich, Worcestershire) was constructed to be a secure Internet based repository freely available to the societies' memberships. | Recent funding support from NHS England. Recurring funding to ensure expansion of the Registry is being sought independently of the spine societies. | Collection of outcome measures after surgery, including patient reported scores is central to the function of the BSR. To give a more reliable overview of current spinal activity in the United Kingdom a mandatory dataset has been determined. The BSR team decided to collect PROMs for specific procedures at predetermined time points. | The standard patient questionnaires will include the EuroQoL EQ-5D, VAS and the Oswestry Disability Index. A satisfaction assessment akin to the Friends and Family tool will also be used at the final follow-up stage | The surgical team can enter scores retrospectively after paper form collection or the data can be entered prospectively by the patient themselves either via an email portal, a personal computer, a tablet or a smartphone while the patient is in outpatients. To this end, the BSR is in discussion with NHS England, the National Institute for Health and Care Excellence, HQIP, the Private Healthcare Information Network and the Association of British Healthcare Industries, amongst others, to enshrine the BSR as the central resource for spinal surgical data for the United Kingdom. | Until mandatory status is achieved, it is unlikely the true value of the BSR will be realised. At present, this is largely beyond the direct control of the Spine Societies, but progress made through the British Orthopaedic Association's Quality Outcomes Committee. Since 2009 it has been a mandatory requirement for all facilities providing care to NHS patients undergoing hip and knee arthroplasty, groin hernia repair and varicose vein surgery to participate in the national PROMs programmes. The BSR has been designed to enable multiple modes of capture, either by secure email, or via touchscreen input on a tablet or kiosk computer while the patient is in outpatients which should reduce questionnaire fatigue. Support is needed from NHS trusts and private providers that offer NHS treatment in terms of recognition of the time and logistical requirements of capturing this type of data on large numbers of patients. Need the support and input of the stakeholders. Raising awareness of the | Since its launch in 2012, over 650 users have registered more than 27 000 patients onto the database. These users include representatives from all aspects of the surgical team including surgeons and nurses, to admin assistants, physiotherapists, secretaries and doctors in training. At the 2014 annual scientific meeting of the BSS in Bristol, it was announced that the Society aimed to achieve 100% data capture by the end of 2016. Current uptake of the registry is 15% | NS | Data can be entered prospectively by the patient themselves either via an email portal, a personal computer, a tablet or a smartphone while the patient is in outpatients. Over 12,000 forms have been directly submitted by patients themselves. | There are difficulties around the recording of outcomes following spinal interventions, often because of the heterogeneous nature of the conditions being treated, as well as the significant psychosocial component of patients' presentations. It is uncertain whether the validated and widely accepted generic and disease-specific tools that are currently in use truly discriminate between good and bad operations. In some circumstances they have been shown to be inadequate. Limited outcomes tools may not be able to express fully the true extent of the patient's experience, but they are a start. Practical problems remain with regard to the collection of data, including patient engagement. Many units struggle to facilitate data entry due to the pressures of numbers in clinics and poor infrastructure investment at hospital level. The funding to enable collection is limited, despite the national mandate to do so. | Allow comparison of unit level results such as deep infection rates in scoliosis correction surgery. NHS trusts in England are already obliged to provide PROMS outcomes for surgery, but this has been implemented in a patchy and haphazard manner - the BSR is a valuable resource that would allow a systematic implementation of this policy. SR already gives a national picture of spinal surgery including case mix, volumes and trends, which informs debate and policy making. An additional intention of the design is to facilitate national research via multicentre trials supported by a low-cost data capture system that is secure, reliable and accessible. | Registry can be defined as a systematic collection of a clearly defined set of health and demographic data for patients with specific health characteristics, held in a central database for a predefined purpose'. Registries have limited value unless the data entry is relevant and complete. | Secure Internet based registry. Currently, surgeons and their teams, under the auspices of the Societies, own and control the data on the BSR - this should ensure the accuracy and reliability of such information with specific reference to the surgical detail |
|--------------|----------------------------------------------------------------------------------|------|------------------------|----------------|---------------------------------------------------------------------------------------------------------------------------------|------------------------|-------------------------------------------------------------------------------------------------------------------------------------------------------------------------------------------------------|-----------------------------------------------------------------------------------------------------------------------------------------------------------------------------------------------------------------------------------------------------------------------------------------------------------------------------|------------------------------------------------------------------------------------------------------------------------------------------------------|-----------------------------------------------------------------------------------------------------------------------------------------------------------------------------------------------------------------------------------------------------------------------------------------------------------------------------------------------|-------------------------------------------------------------------------------------------------------------------------------------------------------------------------------------------------------------------------|-----------------------------------------------------------------------------------------------------------------------------------------------------------------------------------------------------------------------------------------------------------------------------------------------------------------------------------------------------------------------------------------------------------------------------------------------------------------------------------------------------------------------------------------------------------------------------------------------------|------------------------------------------------------------------------------------------------------------------------------------------------------------------------------------------------------------------------------------------------------------------------------------------------------------------------------------------------------------------------------------------------------------------------------------------------------------------------------------------------------------------------------------------------------------------------------------------------------------------------------------------------------------------------------------------------------------------------------------------------------------------------------------------------------------------------------------------------------------------------------------------------------------------------------------------------------------------------------------------------------------------------------------|----------------------------------------------------------------------------------------------------------------------------------------------------------------------------------------------------------------------------------------------------------------------------------------------------------------------------------------------------------------------------------------------------------------------------------------------------------------------------------------|----|---------------------------------------------------------------------------------------------------------------------------------------------------------------------------------------------------------------------------------------------------|------------------------------------------------------------------------------------------------------------------------------------------------------------------------------------------------------------------------------------------------------------------------------------------------------------------------------------------------------------------------------------------------------------------------------------------------------------------------------------------------------------------------------------------------------------------------------------------------------------------------------------------------------------------------------------------------------------------------------------------------------------------------------------------------------------------------------------------------------------------------------------------------------------------------------------------------------|-------------------------------------------------------------------------------------------------------------------------------------------------------------------------------------------------------------------------------------------------------------------------------------------------------------------------------------------------------------------------------------------------------------------------------------------------------------------------------------------------------------------------------------------------------------------------------------------------------------------------------------------------------------------------------|---------------------------------------------------------------------------------------------------------------------------------------------------------------------------------------------------------------------------------------------------------------------------------------------------|--------------------------------------------------------------------------------------------------------------------------------------------------------------------------------------------------------------------------------------------------------------------|

1  
2  
3  
4  
5  
6  
7  
8  
9  
10  
11  
12  
13  
14  
15  
16  
17  
18  
19  
20  
21  
22  
23  
24  
25  
26  
27  
28  
29  
30  
31  
32  
33  
34  
35  
36  
37  
38  
39  
40  
41  
42  
43  
44  
45  
46  
47

registry is vital through wider publicity. Currently, surgeons and their teams, under the auspices of the Societies, own and control the data on the BSR - this should ensure the accuracy and reliability of such information with specific reference to the surgical detail

1  
2  
3  
4  
5  
6  
7  
8  
9  
10  
11  
12  
13  
14  
15  
16  
17  
18  
19  
20  
21  
22  
23  
24  
25  
26  
27  
28  
29  
30  
31  
32  
33  
34  
35  
36  
37  
38  
39  
40  
41  
42  
43  
44  
45  
46  
47

|           |           |      |           |         |                                                                                                  |    |                        |                                                                                                                                                                                                                                          |             |    |                                                                                                                                                                                                                                                                                                                                                                                                                                                                                                                                                                                                                                                                                                                                                                                                          |                                                               |                                                                                                                                                                                                                                                                                                                                                                                                                                                                                                                                                                                                                     |                                                                                                                                        |                                             |    |    |                                                                                                                                                                                                                                                                                          |    |                                                                                                                                                                                                                                                                                                                                                                                                                            |
|-----------|-----------|------|-----------|---------|--------------------------------------------------------------------------------------------------|----|------------------------|------------------------------------------------------------------------------------------------------------------------------------------------------------------------------------------------------------------------------------------|-------------|----|----------------------------------------------------------------------------------------------------------------------------------------------------------------------------------------------------------------------------------------------------------------------------------------------------------------------------------------------------------------------------------------------------------------------------------------------------------------------------------------------------------------------------------------------------------------------------------------------------------------------------------------------------------------------------------------------------------------------------------------------------------------------------------------------------------|---------------------------------------------------------------|---------------------------------------------------------------------------------------------------------------------------------------------------------------------------------------------------------------------------------------------------------------------------------------------------------------------------------------------------------------------------------------------------------------------------------------------------------------------------------------------------------------------------------------------------------------------------------------------------------------------|----------------------------------------------------------------------------------------------------------------------------------------|---------------------------------------------|----|----|------------------------------------------------------------------------------------------------------------------------------------------------------------------------------------------------------------------------------------------------------------------------------------------|----|----------------------------------------------------------------------------------------------------------------------------------------------------------------------------------------------------------------------------------------------------------------------------------------------------------------------------------------------------------------------------------------------------------------------------|
| AuditData | AuditBase | 2016 | AuditBase | Otology | Six expert implant teams in England, Scotland and Wales have given input to develop the database | NS | To increase efficiency | User-friendly and easy to navigate. Integrates all audiology disciplines in one system for maximum flexibility and resource management. Six expert implant teams in England, Scotland and Wales have given input to develop the database | Self funded | NS | Patient demographics, GP information, medical background, Pre-op assessment, contact details, baseline hearing (audiograms and other hearing tests), date of surgery, Ear side, surgical approach, implant details, surgical consent including date, Pre and post operative information, surgical information, 2 to 5 months after surgery , over one year after surgery, recording patient drop out; air conduction, bone conduction, air-bone-gap, graphical overlay of audiograms, visual indicator of Belfast rule of thumb success; Histograms of trends in air and bone means over extended periods, OAE, ABR and CERA measurements, 32 speech and language and speech discrimination tests summary score screens, name of clinician, CT/MRI scans, patient questionnaires regarding their results | Advanced connectivity between AuditBase and Hospital systems. | Data is easy to access, user-friendly and easy to navigate. Integrates all disciplines in one system for maximum flexibility and resource management. Core data entry forms. A checklist to ensure that all the necessary steps have been completed, easy access to data for research purposes, can use the registry from remote (off-site) locations, allows complete exporting of data to Excel, has built in patient reports with hearing results. Helps you send letters to patients and healthcare professionals. Can also be used to send mobile phone text reminders to patients for clinics and operations. | Used in more than 80% of all hospital audiology clinics in the UK and Scandinavia. More than 4500 users in over 500 audiology clinics. | The system helps you generate audit reports | NS | NS | Enables you to plan and easily visualise a patients pathway. It can help you keep control of expenditure and gain funds from commissioners. Gives you information on patient preferences. Helps you report data. Helps you manage stock levels and help with managing purchase ordering. | NS | AuditBase is CE-marked as a medical device (class I) under the EU Medical Device Directive. It is registered with the UK ICO-Information Commissioners Office (required by the Data Protection Act). NS and ISO 27001 (information security) certified. Completed the NHS Information Governance Statement of Compliance and therefore comply with all legal requirements of the NHS to safeguard patient confidentiality. |
|-----------|-----------|------|-----------|---------|--------------------------------------------------------------------------------------------------|----|------------------------|------------------------------------------------------------------------------------------------------------------------------------------------------------------------------------------------------------------------------------------|-------------|----|----------------------------------------------------------------------------------------------------------------------------------------------------------------------------------------------------------------------------------------------------------------------------------------------------------------------------------------------------------------------------------------------------------------------------------------------------------------------------------------------------------------------------------------------------------------------------------------------------------------------------------------------------------------------------------------------------------------------------------------------------------------------------------------------------------|---------------------------------------------------------------|---------------------------------------------------------------------------------------------------------------------------------------------------------------------------------------------------------------------------------------------------------------------------------------------------------------------------------------------------------------------------------------------------------------------------------------------------------------------------------------------------------------------------------------------------------------------------------------------------------------------|----------------------------------------------------------------------------------------------------------------------------------------|---------------------------------------------|----|----|------------------------------------------------------------------------------------------------------------------------------------------------------------------------------------------------------------------------------------------------------------------------------------------|----|----------------------------------------------------------------------------------------------------------------------------------------------------------------------------------------------------------------------------------------------------------------------------------------------------------------------------------------------------------------------------------------------------------------------------|

62

|   |                                                                                                                                      |                                    |      |                                 |         |                                                                                                                                                                                                                                                                                                                |    |                                                                                                                                                                                                                                                                                                                                                                                                                                                                                                                                                                                                                                                                                                                                                                                                                                                                                                                                                                                                                                     |    |                                                                                                                                                                                                                                                                                                                                                                                                                                                                                                                                                                                                                                   |    |          |                                                                                                                                      |                                                                                                                                                                                                                                                                                                                                                                                                                                                                                                                                                                                                                                                |                                                                                                                                                                                                                                                                                                                                                                                                                                                                                                          |                                                                                                                                                                                                                                                                                                                                                                                                                                                                       |    |                                                                                                            |    |    |                                                                                                                                                                                                                                                                                                                                                                                                                                                                                                                        |    |                                                                                                                                                                                                                                                                                                                                                                                               |
|---|--------------------------------------------------------------------------------------------------------------------------------------|------------------------------------|------|---------------------------------|---------|----------------------------------------------------------------------------------------------------------------------------------------------------------------------------------------------------------------------------------------------------------------------------------------------------------------|----|-------------------------------------------------------------------------------------------------------------------------------------------------------------------------------------------------------------------------------------------------------------------------------------------------------------------------------------------------------------------------------------------------------------------------------------------------------------------------------------------------------------------------------------------------------------------------------------------------------------------------------------------------------------------------------------------------------------------------------------------------------------------------------------------------------------------------------------------------------------------------------------------------------------------------------------------------------------------------------------------------------------------------------------|----|-----------------------------------------------------------------------------------------------------------------------------------------------------------------------------------------------------------------------------------------------------------------------------------------------------------------------------------------------------------------------------------------------------------------------------------------------------------------------------------------------------------------------------------------------------------------------------------------------------------------------------------|----|----------|--------------------------------------------------------------------------------------------------------------------------------------|------------------------------------------------------------------------------------------------------------------------------------------------------------------------------------------------------------------------------------------------------------------------------------------------------------------------------------------------------------------------------------------------------------------------------------------------------------------------------------------------------------------------------------------------------------------------------------------------------------------------------------------------|----------------------------------------------------------------------------------------------------------------------------------------------------------------------------------------------------------------------------------------------------------------------------------------------------------------------------------------------------------------------------------------------------------------------------------------------------------------------------------------------------------|-----------------------------------------------------------------------------------------------------------------------------------------------------------------------------------------------------------------------------------------------------------------------------------------------------------------------------------------------------------------------------------------------------------------------------------------------------------------------|----|------------------------------------------------------------------------------------------------------------|----|----|------------------------------------------------------------------------------------------------------------------------------------------------------------------------------------------------------------------------------------------------------------------------------------------------------------------------------------------------------------------------------------------------------------------------------------------------------------------------------------------------------------------------|----|-----------------------------------------------------------------------------------------------------------------------------------------------------------------------------------------------------------------------------------------------------------------------------------------------------------------------------------------------------------------------------------------------|
| 1 | Yung M, Gjurić M, Haeusler R, Van de Heyning PH, Martin C, Swan IR, Tange RA, Huy PT, European Otolaryngology Database Project Group | An international otology database. | 2005 | International otology database. | Otology | A working party of 27 otologists from 12 countries in Europe has already agreed on the content of a common ear database. The project group members include otologists from the United Kingdom, Belgium, Switzerland, France, Germany, Croatia, Holland, Sweden, Poland, Slovak Republic, Denmark, and Hungary. | NS | This paper proposes an International Otology Database. The aims of the project are: To identify common otology audit data among clinicians; To provide an information technology system to store otology data for clinicians; To create a large database that allows statistical analysis to be made on various otologic interventions with sufficient power; To produce standards or benchmarks for comparative audit. The web-based system can be a useful learning tool for surgeons because it gives almost real-time feedback to the individual surgeon. This enables clinicians to monitor their own surgical practice against these standards. The Surgical Training Committee can even use it as a tool to implement competency-based training for surgical trainees; The system provides the mechanism for hospitals or clinicians to collaborate in clinical trials using the common data input methodology. The ultimate goal of the proposed project is to provide primary research data that is lacking at the moment. | NS | Web-based, prospective data entry. The data entry is either by tick boxes or selections from drop-down boxes. Input errors are validated using information technology techniques to make sure that all data fields are completed. There should be international consensus on the content of the proposed database. A working party of 27 otologists from 12 countries in Europe has already agreed on the content of a common ear database. The project group members include otologists from the United Kingdom, Belgium, Switzerland, France, Germany, Croatia, Holland, Sweden, Poland, Slovak Republic, Denmark, and Hungary. | NS | BMJ Open | International consensus on the content of the proposed database. The system must be user-friendly, in both data input and retrieval. | Patient details, proposed operation date, pre-operative symptoms, aim of surgery, risk factors, audiogram results, operative findings, approach, materials used, complications, pathology results, audiogram, follow up intervals, main outcomes, free text for comments. Two levels of data entry are available: Level 1 (a minimum otology database); This is designed for general otolaryngologists and surgical trainees. Only main surgical outcomes are recorded. Level 2 (a comprehensive database); This is designed for dedicated otologists. Detailed information on pathologies, risk factors, and surgical procedure are recorded. | Input errors are validated using information technology techniques to make sure that all data fields are completed. Bias reporting or incorrect data entry will contaminate the quality of the "benchmarking database." Therefore, validation of input data is important. This can be done by site visit of each hospital by an external inspector/auditor (another user of the web-based system) to perform random inspection of patient records. Data used as a benchmark or 'standards' are validated | Users of the database should not be exclusive to a few selected otologists. The otology audit system is available to any surgeons who perform middle ear operation in Europe. Every data field on the data entry form needs to be completed before the form is accepted by the website, thus ensuring completeness of data entry. The data entry is either by tick boxes or selections from drop-down boxes. Pilot the registry needs to be easy to use and flexible, | NS | The identity of surgeon and patient must remain anonymous. Outcome data used for benchmarking is validated | NS | NS | Help drive evidence based medicine, helps produce standards or benchmarks for comparative audit between surgeons and centres, provide real time feedback to the individual surgeon, help develop standards for surgical training, helps provide evidence of quality assurance, helps with commissioning, helps with surgical self audit. Allows statistical analysis to be made on various otologic interventions with sufficient power owing to large amounts of data, helps facilitate clinical trials and research. | NS | Each hospital has allocated an access code and a password. They can change their own password once they log in. The identities of the patients and the surgeons are anonymous. Each hospital would be given a Hospital Code Number and each surgeon a Surgeon Code Number. Each patient is identified on the database with an encrypted Patient Code Number created by the individual surgeon |
|---|--------------------------------------------------------------------------------------------------------------------------------------|------------------------------------|------|---------------------------------|---------|----------------------------------------------------------------------------------------------------------------------------------------------------------------------------------------------------------------------------------------------------------------------------------------------------------------|----|-------------------------------------------------------------------------------------------------------------------------------------------------------------------------------------------------------------------------------------------------------------------------------------------------------------------------------------------------------------------------------------------------------------------------------------------------------------------------------------------------------------------------------------------------------------------------------------------------------------------------------------------------------------------------------------------------------------------------------------------------------------------------------------------------------------------------------------------------------------------------------------------------------------------------------------------------------------------------------------------------------------------------------------|----|-----------------------------------------------------------------------------------------------------------------------------------------------------------------------------------------------------------------------------------------------------------------------------------------------------------------------------------------------------------------------------------------------------------------------------------------------------------------------------------------------------------------------------------------------------------------------------------------------------------------------------------|----|----------|--------------------------------------------------------------------------------------------------------------------------------------|------------------------------------------------------------------------------------------------------------------------------------------------------------------------------------------------------------------------------------------------------------------------------------------------------------------------------------------------------------------------------------------------------------------------------------------------------------------------------------------------------------------------------------------------------------------------------------------------------------------------------------------------|----------------------------------------------------------------------------------------------------------------------------------------------------------------------------------------------------------------------------------------------------------------------------------------------------------------------------------------------------------------------------------------------------------------------------------------------------------------------------------------------------------|-----------------------------------------------------------------------------------------------------------------------------------------------------------------------------------------------------------------------------------------------------------------------------------------------------------------------------------------------------------------------------------------------------------------------------------------------------------------------|----|------------------------------------------------------------------------------------------------------------|----|----|------------------------------------------------------------------------------------------------------------------------------------------------------------------------------------------------------------------------------------------------------------------------------------------------------------------------------------------------------------------------------------------------------------------------------------------------------------------------------------------------------------------------|----|-----------------------------------------------------------------------------------------------------------------------------------------------------------------------------------------------------------------------------------------------------------------------------------------------------------------------------------------------------------------------------------------------|

For peer review only

1  
2  
3  
4  
5  
6  
7  
8  
9  
10  
11  
12  
13  
14  
15  
16  
17  
18  
19  
20  
21  
22  
23  
24  
25  
26  
27  
28  
29  
30  
31  
32  
33  
34  
35  
36  
37  
38  
39  
40  
41  
42  
43  
44  
45  
46  
47

1  
2  
3  
4  
5  
6  
7  
8  
9  
10  
11  
12  
13  
14  
15  
16  
17  
18  
19  
20  
21  
22  
23  
24  
25  
26  
27  
28  
29  
30  
31  
32  
33  
34  
35  
36  
37  
38  
39  
40  
41  
42  
43  
44  
45  
46  
47

|                                           |                                                          |      |                                                 |                              |                                                                                                                                                                        |    |                                                                                                                                                                                                                                                                                                                                                                                                                                                                                                                                                                                                                                                                                                                                                                                                                                                                                                                                                                                                                                                                                           |    |    |                                                                                                                                                                                                                                                                                                                                                              |    |                                                                                                                                                                                                                                                                                                                                                                                                                                                                                                                                                                                                                                                                    |                                                                                                                                                                                                                                                                                                                                                                                                                                                                                                                                                         |                                                                                                                                                                                                                                                                                                                                                                                                                                                                                |                                                                                                                                                                                                                                                          |                                                                                                                  |                                                                                                                  |    |                                                                                 |                                                                                                                  |                                                                                                                                                                                                                                                                                                                                                                                                                                                                                   |                                                                                                                                                                                       |    |    |
|-------------------------------------------|----------------------------------------------------------|------|-------------------------------------------------|------------------------------|------------------------------------------------------------------------------------------------------------------------------------------------------------------------|----|-------------------------------------------------------------------------------------------------------------------------------------------------------------------------------------------------------------------------------------------------------------------------------------------------------------------------------------------------------------------------------------------------------------------------------------------------------------------------------------------------------------------------------------------------------------------------------------------------------------------------------------------------------------------------------------------------------------------------------------------------------------------------------------------------------------------------------------------------------------------------------------------------------------------------------------------------------------------------------------------------------------------------------------------------------------------------------------------|----|----|--------------------------------------------------------------------------------------------------------------------------------------------------------------------------------------------------------------------------------------------------------------------------------------------------------------------------------------------------------------|----|--------------------------------------------------------------------------------------------------------------------------------------------------------------------------------------------------------------------------------------------------------------------------------------------------------------------------------------------------------------------------------------------------------------------------------------------------------------------------------------------------------------------------------------------------------------------------------------------------------------------------------------------------------------------|---------------------------------------------------------------------------------------------------------------------------------------------------------------------------------------------------------------------------------------------------------------------------------------------------------------------------------------------------------------------------------------------------------------------------------------------------------------------------------------------------------------------------------------------------------|--------------------------------------------------------------------------------------------------------------------------------------------------------------------------------------------------------------------------------------------------------------------------------------------------------------------------------------------------------------------------------------------------------------------------------------------------------------------------------|----------------------------------------------------------------------------------------------------------------------------------------------------------------------------------------------------------------------------------------------------------|------------------------------------------------------------------------------------------------------------------|------------------------------------------------------------------------------------------------------------------|----|---------------------------------------------------------------------------------|------------------------------------------------------------------------------------------------------------------|-----------------------------------------------------------------------------------------------------------------------------------------------------------------------------------------------------------------------------------------------------------------------------------------------------------------------------------------------------------------------------------------------------------------------------------------------------------------------------------|---------------------------------------------------------------------------------------------------------------------------------------------------------------------------------------|----|----|
| Ministry of Health<br>Haying P            | A Prospective Multicentre Otolaryngology Database        | 2007 | Prospective Multicentre Otolaryngology Database | Otolaryngology               | There should be international consensus on the content of the proposed database                                                                                        | NS | Aim of the project is to create an interactive otology database for surgeons in the UK and Europe. The aims of the project are: To identify common otology audit data among clinicians; To provide an information technology system to store otology data for clinicians; To create a large database that allows statistical analysis to be made on various otologic interventions with sufficient power; To produce standards or benchmarks for comparative audit. The web-based system can be a useful learning tool for surgeons because it gives almost real-time feedback to the individual surgeon. This enables clinicians to monitor their own surgical practice against these standards. The Surgical Training Committee can even use it as a tool to implement competency-based training for surgical trainees; The system provides the mechanism for hospitals or clinicians to collaborate in clinical trials using the common data input methodology; The ultimate goal of the proposed project is to provide primary potential research data that is lacking at the moment. | NS | NS | There should be international consensus on the content of the proposed database. The system must be user-friendly, both in data input and retrieval. A working party of international otologists from 11 countries has already agreed on the content of a common ear database. Web-based and prospective. Piloting the registry is useful for user feedback. | NS | Patient details, proposed operation date, pre-operative symptoms, aim of surgery, risk factors, audiogram results, operative findings, operative details (approach, materials used), complications, pathology results, audiogram, follow up intervals, main outcomes, free text for comments. Two levels of data entry are available: Level 1 (a minimum otology database); This is designed for general otolaryngologists and surgical trainees. Only main surgical outcomes are recorded. Level 2 (a comprehensive database): This is designed for dedicated otologists. Detailed information on pathologies, risk factors, and surgical procedure are recorded. | Data used as a benchmark or 'standards' are validated. The methodology requires surgeons to put in pre-operative data on all patients scheduled for ear surgery, thus eliminating bias from selective reporting of operations. Validation of data can be done by site visit of each hospital by an external inspector/auditor (another user of the web-based system) to perform random inspection of patient records. The benefit of using peers to validate data from each centre gives a further opportunity for clinicians to learn from each other. | The system must be user-friendly, both in data input and retrieval. The use of the database should not be exclusive to a few selected otologists. Every field on the data form needs to be completed before the form is accepted, thus ensuring completeness of data entry. Each surgeon can download his surgical results from the website into an Excel file in almost real time                                                                                             | NS                                                                                                                                                                                                                                                       | The identity of surgeon and patient must remain anonymous; data used as a benchmark or 'standards' are validated | NS                                                                                                               | NS | To help facilitate comparisons and establish standards. To facilitate research. | Help generate data quickly for clinical trials.                                                                  | The identity of surgeon and patient must remain anonymous. Each surgeon is allocated an access code and a password. Data will be owned by all the members who contributed                                                                                                                                                                                                                                                                                                         |                                                                                                                                                                                       |    |    |
| Health and Social Care Information Centre | National Head and Neck Cancer Audit, Tenth annual report | 2014 | National Head and Neck Cancer Audit             | Head and Neck Cancer surgery | The Healthcare Quality Improvement Partnership (HQIP), Health and Social Care Information Centre (HSCIC), The British Association of Head and Neck Oncologists (BAHNO) | NS | The aim of the Audit is to improve quality of care to those patients with head and neck cancer by raising standards of care to match those of the best performing teams.                                                                                                                                                                                                                                                                                                                                                                                                                                                                                                                                                                                                                                                                                                                                                                                                                                                                                                                  | NS | NS | The Audit was commissioned by the Healthcare Quality Improvement Partnership (HQIP) and funded by NHS England and the Welsh Government.                                                                                                                                                                                                                      | NS | Measures for cancer outcomes have been drawn from the National Institute for Health and Care Excellence (NICE) published guidance on head and neck cancer - this facilitates comparison of practice to national guidance. The Patient Concerns Inventory (PCI) is a tool that helps patients more effectively voice concerns during their follow up, with the aim of better holistic care. For the first time the Audit has collected information on the patient's experience and future better understanding of                                                                                                                                                   | Patient demographics, Patient Concerns Inventory, mortality, treatment received, four year survival, speech and language assessment, time to treatment, Human Papilloma Virus (HPV) status. Whether HPV was tested. Whether there was an MDT discussion. Length of stay. Complications.                                                                                                                                                                                                                                                                 | Analysis was performed by the HSCIC analysis team, and interpretation of data was facilitated by an Expert Panel of head and neck professionals. It is useful to supplement and link audit data with external data sets such as HES to increase accuracy. Casemix adjusted mortality ratios provide a more meaningful way to compare outcomes between cancer networks. This allows networks to be scored as to whether the results are outside expected levels. Combination of | Publishing the registry. Having a restricted data set has led to higher levels of data completeness - it is important to have for focused and targeted questioning. It is important to provide staff with adequate support and resources to submit data. | NS                                                                                                               | The report was produced by the National Head and Neck Cancer Audit Project Team under the auspices of the HSCIC. | NS | NS                                                                              | The report was produced by the National Head and Neck Cancer Audit Project Team under the auspices of the HSCIC. | Patients concerns inventory (PCI) This is a tool that helps patients more effectively voice concerns during their follow up, with the aim of better holistic care. This is the first time the Audit has collected information on the use of this tool. In this data period only a small percentage of patients completed the PCI. Trust participation in the tenth Annual Report is estimated at 96 per cent. 86.0 per cent of the patients' treatment recorded; 86.3 per cent in | Difficult to get data completion on patient concerns inventory. Difficult to supplement/link the audit data with other data sets like HES which would help make the data more robust. | NS | NS |

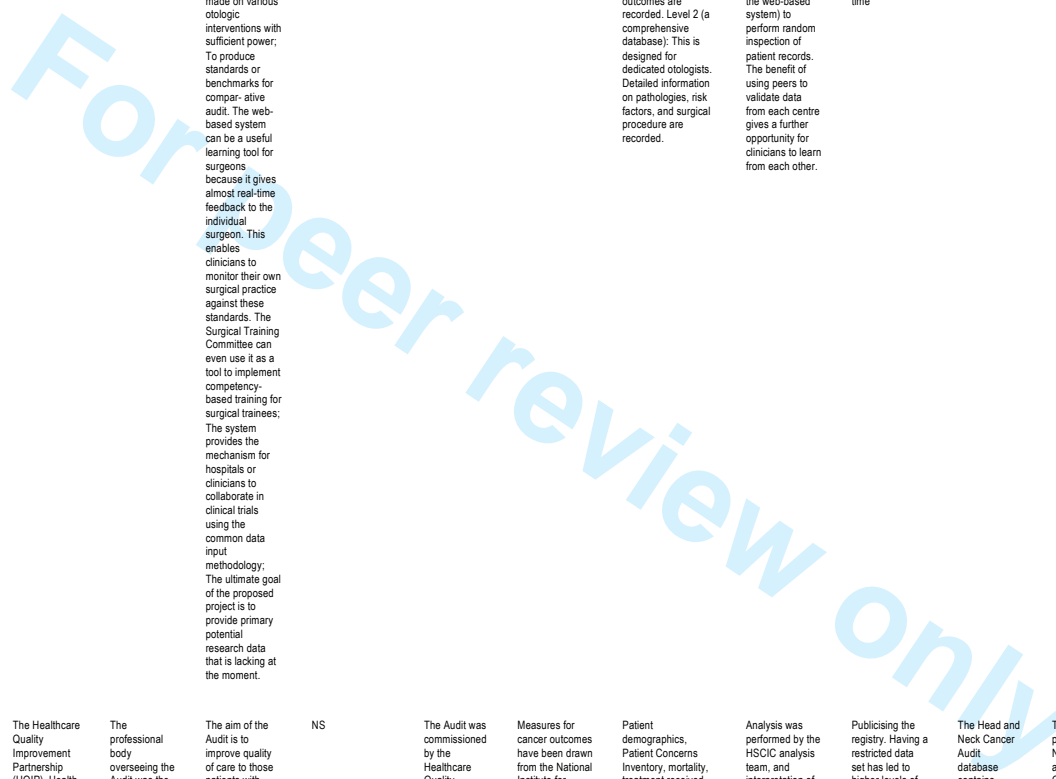

different data sources is both feasible and has led to significant added value

England and 82.1 per cent in Wales.

of care reflect on their performance and develop actions to improve. Helps improve standards of care. Facilitates research. Enables monitoring of NHS standards of care and supports service reorganisation and appropriate commissioning.

help direct appropriate support for patients and their carers.

|                                                   |                                                                                          |      |                                     |                   |                                                                                                                                                                                                                |                                                                                            |                                                                                                                                                                                                                                                                            |                                                                                                                                                                                                                               |                                                                                              |                                                                                                                                           |                                                                                                                                                                                                                                          |                                                                                                                                                                                                                                                                    |                                                                                                                                                                                                                                                                    |                                                                                      |                                                                                                 |    |                                                                                                                                                                                                          |                                                                                                                                                                                                                                                                                                                                                                                                                                                                                                                                                                                                                                                                              |    |                                                                                                                                                                                                                                                                                                                                                                                                                                                                                                                                                              |
|---------------------------------------------------|------------------------------------------------------------------------------------------|------|-------------------------------------|-------------------|----------------------------------------------------------------------------------------------------------------------------------------------------------------------------------------------------------------|--------------------------------------------------------------------------------------------|----------------------------------------------------------------------------------------------------------------------------------------------------------------------------------------------------------------------------------------------------------------------------|-------------------------------------------------------------------------------------------------------------------------------------------------------------------------------------------------------------------------------|----------------------------------------------------------------------------------------------|-------------------------------------------------------------------------------------------------------------------------------------------|------------------------------------------------------------------------------------------------------------------------------------------------------------------------------------------------------------------------------------------|--------------------------------------------------------------------------------------------------------------------------------------------------------------------------------------------------------------------------------------------------------------------|--------------------------------------------------------------------------------------------------------------------------------------------------------------------------------------------------------------------------------------------------------------------|--------------------------------------------------------------------------------------|-------------------------------------------------------------------------------------------------|----|----------------------------------------------------------------------------------------------------------------------------------------------------------------------------------------------------------|------------------------------------------------------------------------------------------------------------------------------------------------------------------------------------------------------------------------------------------------------------------------------------------------------------------------------------------------------------------------------------------------------------------------------------------------------------------------------------------------------------------------------------------------------------------------------------------------------------------------------------------------------------------------------|----|--------------------------------------------------------------------------------------------------------------------------------------------------------------------------------------------------------------------------------------------------------------------------------------------------------------------------------------------------------------------------------------------------------------------------------------------------------------------------------------------------------------------------------------------------------------|
| Hopkins J<br>Welbourn R                           | The importance of national registries/databases in metabolic surgery: the UK experience. | 2016 | National Bariatric Surgery Registry | Bariatric surgery | British Obesity and Metabolic Surgery Society, the Association of Laparoscopic Surgeons of Great Britain & Ireland, and the Association of Upper Gastro-intestinal Surgeons, Dendrite Clinical Systems Limited | NS                                                                                         | The aim of this paper was to present the baseline patient characteristics, type 2 diabetes outcomes, and main operation results from January 2009 to December 2013, incorporating the data from the first 2 book reports, and compare them with other national registries. | The NBSR is a web-based application developed to collect prospective data for all bariatric surgery patients in the UK and Ireland.                                                                                           | Seed funding provided by the Association of Laparoscopic Surgeons of Great Britain & Ireland | NS                                                                                                                                        | Patient demographics, comorbidities, primary or revision surgery, type of surgery, funding of surgery, BMI, diabetic status, post of complications, date of discharge, destination of discharge, mortality, cause of death, weight loss. | Data are typically collected and submitted during routine clinical visits pre and postoperatively. To provide external validation, the NBSR also analysed NHS administrative data that is independently collected. As a cross check, data were compared to the ONS | Minimise the dataset, be selective with data collection fields. In April 2012, the NBSR became mandatory for NHS provider units. Data completeness in the NBSR has improved to over 90% since it became mandatory. Promote a culture of submitting data routinely. | Produced outcomes reports in more than 25,328 patients. Data completion of over 90%. | The registry had individual consultant surgeon mortality data published for the years 2012–2014 | NS | One of the biggest challenges of any registry is collecting long term outcomes. Another key challenge is agreeing on core outcome sets and trying to make this compatible with international registries. | Registries provide commissioners and decision makers with robust and real world data that help them make decisions. Registries can influence policy; the NBSR has influenced NICE guidance. Helps drive quality improvement. Registries improve the profile and acceptance of metabolic surgery amongst payors and commissioners. Registries can indicate which patients have the greatest likelihood of success from the operation, which is important in the NHS, where rates of surgery are rationed to a fraction of those deemed eligible by national guidelines. Can help identify variations in practice within the UK but also between different healthcare systems. | NS | Access is via a unique password-protected ID for registered surgeons and their named delegates. Each user sees only their own data and access to the database as a whole is restricted to system administrators, with data release controlled by a database committee. Patient data are anonymised to comply with the UK Data Protection Act 1998, with a unique ID number allocated to each patient at the point of initial data entry. In the published NBSR reports, only aggregated data are reported without identifying any patient, surgeon, or unit. |
| National Institute for Health and Care Excellence | Interventional procedures programme manual. Section 12.3                                 | 2016 | NS                                  | NS                | NS                                                                                                                                                                                                             | Independent steering group should be responsible for design, data monitoring and analysis. | This section provides NICE standards and criteria for recommending a register in Interventional Procedures guidance                                                                                                                                                        | The register should be recorded on national database of registers. Medicines and Healthcare products Regulatory Agency/NICE and professional representatives should be involved in dataset design and agree the final design. | NS                                                                                           | In their guidance documents, NICE specifies the outcomes that are most needed. This can be looked at when developing a national registry. | All known procedures (all devices), without exception, are recorded in the database. Efficacy and safety outcomes and important patient characteristics.                                                                                 | Process for data collection, storage and analysis independent of any particular company or any commercial interest.                                                                                                                                                | NS                                                                                                                                                                                                                                                                 | NS                                                                                   | There should be explicit intent to publish results whatever the outcome.                        | NS | NS                                                                                                                                                                                                       | When data on efficacy or safety are inadequate in quality or quantity, registry data can enable NICE to review and update their guidance. Registries are useful for providing efficacy and safety data. Registries also encourage audit of outcomes.                                                                                                                                                                                                                                                                                                                                                                                                                         | NS | Data should be anonymised. The Registry must comply with the data protection principles laid out in the UK Data Protection Act 1998 and any other relevant legislation. The data should be used fairly, for specific purposes, the data should not be kept for longer than is necessary, the data should be kept safe and secure, and not transferred outside the European Economic Area without                                                                                                                                                             |

1  
2  
3  
4  
5  
6  
7  
8  
9  
10  
11  
12  
13  
14  
15  
16  
17  
18  
19  
20  
21  
22  
23  
24  
25  
26  
27  
28  
29  
30  
31  
32  
33  
34  
35  
36  
37  
38  
39  
40  
41  
42  
43  
44  
45  
46  
47

66

67

1  
2  
3  
4  
5  
6  
7  
8  
9  
10  
11  
12  
13  
14  
15  
16  
17  
18  
19  
20  
21  
22  
23  
24  
25  
26  
27  
28  
29  
30  
31  
32  
33  
34  
35  
36  
37  
38  
39  
40  
41  
42  
43  
44  
45  
46  
47

|                                          |                                                                                         |      |                                                     |                           |    |                                                         |                                                                                                                                                                                         |                                                                                                                                                      |                                                              |                                                                                                                                                         |                                                                                                                                                                                  |                                                                                                                                                                                                                                                                                                                                                   |                                                                                                                                                                                                                                                 |                                                                                                                                      |    |    |                                                                                                                                                                                             |                                                                                                                                                                                                                                                                                                                                                                          |    |                                                                            |
|------------------------------------------|-----------------------------------------------------------------------------------------|------|-----------------------------------------------------|---------------------------|----|---------------------------------------------------------|-----------------------------------------------------------------------------------------------------------------------------------------------------------------------------------------|------------------------------------------------------------------------------------------------------------------------------------------------------|--------------------------------------------------------------|---------------------------------------------------------------------------------------------------------------------------------------------------------|----------------------------------------------------------------------------------------------------------------------------------------------------------------------------------|---------------------------------------------------------------------------------------------------------------------------------------------------------------------------------------------------------------------------------------------------------------------------------------------------------------------------------------------------|-------------------------------------------------------------------------------------------------------------------------------------------------------------------------------------------------------------------------------------------------|--------------------------------------------------------------------------------------------------------------------------------------|----|----|---------------------------------------------------------------------------------------------------------------------------------------------------------------------------------------------|--------------------------------------------------------------------------------------------------------------------------------------------------------------------------------------------------------------------------------------------------------------------------------------------------------------------------------------------------------------------------|----|----------------------------------------------------------------------------|
| PELICAN                                  | LOREC APE Perineal Wound Registry                                                       | 2016 | NS                                                  | Abdominoperineal excision | NS | Steering committee. The registry is maintained by LOREC | The objective is to find out which aspects of each procedure (for abdomino perineal excision) are most successful for patients in terms of complication free wound closure and healing. | Online registry hosted on LOREC website.                                                                                                             | NS                                                           | NS                                                                                                                                                      | NS                                                                                                                                                                               | NS                                                                                                                                                                                                                                                                                                                                                | NS                                                                                                                                                                                                                                              | NS                                                                                                                                   | NS | NS | NS                                                                                                                                                                                          | Provides data on current practice and outcomes.                                                                                                                                                                                                                                                                                                                          | NS | There is a data custodian. The registry leads have access to all the data. |
| Uberoi R. Milburn S. Moss Jon. Gaines P. | British Society of Interventional Radiology Iliac Artery Angioplasty-Stent Registry III | 2009 | BSIR Iliac Artery Angioplasty-Stent (BIAS) registry | Iliac artery intervention | NS | NS                                                      | Setting standards of practice for interventional radiologists carrying out iliac interventional procedures                                                                              | Based on a previous BIAS registry. Access to the registries could be obtained either through the BSIR Web site or directly at the Dendrite Web site. | The registry is funded by the BSIR on behalf of its members. | Based on a previous BIAS, the data sets were modified so that the number of data collected from each procedure was reduced and free text was minimised. | Type of intervention, patient demographics, comorbidities, day-case or inpatient, level of clinician, indication, elective/emergency, procedure details, outcome, complications. | Data were collected and analyzed by Dendrite Clinical Systems                                                                                                                                                                                                                                                                                     | Minimise the dataset and amount of free text. Online collection of data. Increase pressure for clinicians to self-audit. External motivation in the form of regular feedback, newsletters, and follow up e-mails requires funding and staff.    | Over a 43-month period (2005 to 2008) 37 institutions submitted data for 2233 patients. This brings the total BIAS database to 4295. | NS | NS | It is challenging to achieve good rates of data completion. This is likely due to lack of time and motivation. It is also difficult to capture long term follow up data. Limited resources. | Provide a structured format for collecting data. Allow comparison of an individual's performance with that of others, highlighting areas which are done well and those in need of improvement. Enables assessment of trends in practice. Enables individuals to carry out regular audits and comply with local and national requirements for appraisal and revalidation. | NS | NS                                                                         |
| Goode SD. Cleveland T.J. Gaines PA       | United Kingdom Carotid Artery Stent Registry: Short- and Long-Term Outcomes             | 2013 | UK CAS Registry                                     | Carotid artery stenting   | NS | NS                                                      | To monitor the practice of CAS with the aims of gathering short and long-term data to better inform our practice.                                                                       | Set up by BSIR. Voluntary registry open to all UK hospitals.                                                                                         | NS                                                           | NS                                                                                                                                                      | Demographics, comorbidities, indications, location of disease, procedure information, 30-day outcomes, complications.                                                            | Data were self-reported and collated by a clinician entering data into the registry. A follow-up form was sent to each centre on an annual basis. Centres that had not returned follow-up forms were sent another form and followed-up by a telephone call. All data were entered onto a clinical database provided by Dendrite Clinical Systems. | Data entry into the registry was encouraged by the publication of the National Institute of Clinical Excellence (NICE) guidance, which advised that data of all patients undergoing CAS should be entered into UK CAS registry held by the BSIR | NS                                                                                                                                   | NS | NS | NS                                                                                                                                                                                          | Enables monitoring of practices.                                                                                                                                                                                                                                                                                                                                         | NS | NS                                                                         |

For Peer Review Only

# BMJ Open

## What are the essential features of a successful surgical registry? A systematic review

|                                 |                                                                                                                                                                                                                                                                                                                                                                                      |
|---------------------------------|--------------------------------------------------------------------------------------------------------------------------------------------------------------------------------------------------------------------------------------------------------------------------------------------------------------------------------------------------------------------------------------|
| Journal:                        | <i>BMJ Open</i>                                                                                                                                                                                                                                                                                                                                                                      |
| Manuscript ID                   | bmjopen-2017-017373.R2                                                                                                                                                                                                                                                                                                                                                               |
| Article Type:                   | Research                                                                                                                                                                                                                                                                                                                                                                             |
| Date Submitted by the Author:   | 16-Aug-2017                                                                                                                                                                                                                                                                                                                                                                          |
| Complete List of Authors:       | Mandavia, Rishi; University College London Ear Institute, Knight, Alec; King's College London, Department of Primary Care and Public Health Sciences<br>Phillips , John<br>Mossialos, Elias; Imperial College London, Institute of Global Health Innovation<br>Littlejohns, Peter; Kings College London, Primary care and public health<br>Schilder, Anne; University college London |
| <b>Primary Subject Heading</b>: | Surgery                                                                                                                                                                                                                                                                                                                                                                              |
| Secondary Subject Heading:      | Health informatics, Research methods, Evidence based practice, Surgery, Health services research                                                                                                                                                                                                                                                                                     |
| Keywords:                       | Registry, Otolaryngology < SURGERY, Health informatics < BIOTECHNOLOGY & BIOINFORMATICS, SURGERY                                                                                                                                                                                                                                                                                     |
|                                 |                                                                                                                                                                                                                                                                                                                                                                                      |

SCHOLARONE™  
Manuscripts

only



**What are the essential features of a successful surgical registry? A systematic review**

Mr Rishi Mandavia (RM) (1)

Dr Alec Knight (AK) (2)

Mr John Phillips (JP) (3)

Professor Elias Mossialos (EM) (4)

Professor Peter Littlejohns (PL) (2)

Professor Anne Schilder (AS) (1)

(1) evidENT team, UCL Ear Institute, Royal National Throat, Nose and Ear Hospital, 330 Grays Inn Road, London WC1X 8DA, UK

(2) Department of Primary Care and Public Health Sciences, King's College London, Addison House, London, SE1 IUL, UK

(3) Department of Ear Nose and Throat Surgery, Norfolk and Norwich University Hospital, Norwich, NR4 7UY, UK

(4) Centre for Health Policy, Imperial College London, St Mary's Hospital, South Wharf Road, London W2 JNY

**Corresponding author**

Mr Rishi Mandavia

Academic Clinical Fellow ENT, NICE Scholar

evidENT Team,

Ear Institute,

University College London

Royal National Throat, Nose and Ear Hospital

330 Grays Inn Road

London, WC1X 8DA

[rishimandavia@gmail.com](mailto:rishimandavia@gmail.com)

+44 (0) 20 3108 9327

## ABSTRACT

### Objective

The regulation of surgical implants is vital to patient safety and there is an international drive to establish registries for all implants. Hearing loss is an area of unmet need and industry is targeting this field with a growing range of surgically-implanted hearing devices. Currently, there is no comprehensive UK-registry capturing data on these devices; in its absence, it is difficult to monitor safety, practices and effectiveness. A solution is developing a national registry of all auditory implants. However, developing and maintaining a registry faces considerable challenges. In this systematic review, we aimed to identify the essential features of a successful surgical registry.

### Methods

A systematic literature review was performed adhering to PRISMA recommendations. A comprehensive search of the Medline and Embase databases was conducted in November 2016 using the Ovid Portal. Inclusion criteria were: publications describing the design, development, critical analysis or current-status of a national surgical registry. All registry names identified in the screening process were noted and searched in the grey literature. Available national registry reports were reviewed from registry websites. Data were extracted using a data extraction table developed by thematic analysis. Extracted data were synthesised into a structured narrative.

### Results

Sixty-nine publications were included. The fundamentals to successful registry development include: steering committee to lead and oversee the registry; clear registry objectives; planning for initial and long-term funding; strategic national collaborations amongst key stakeholders; dedicated registry management team; consensus meetings to agree registry dataset; established data processing systems; anticipating challenges; implementing strategies to increase data completion. Patient involvement and awareness of legal factors should occur throughout the development process.

### Conclusions

1  
2  
3 This systematic review provides robust knowledge that can be used to inform the successful  
4 development of any UK-surgical registry. It also provides a methodological framework for  
5 international surgical registry development.  
6  
7  
8  
9

### 10 **Strengths and limitations of this study**

- 11 • This review provides a systematic and evidence based foundation for the development  
12 of any surgical registry.  
13
- 14 • We adopted a rigorous approach searching both the scientific and grey literature and  
15 used thematic analysis to develop our data extraction table.  
16
- 17 • Data analyses at all stages were cross checked by a second judge and discussed at  
18 consensus meetings.  
19
- 20 • We did not perform quality assessment of the publications included in this review,  
21 owing to the non-empirical nature of included publications and the considerable  
22 heterogeneity amongst types of included publications.  
23
- 24 • By excluding non-surgical registries, we may have failed to capture important  
25 information on registry development. Our decision was based on surgical registries  
26 having specific attributes that we wanted to learn from including: datasets, strategies to  
27 increase surgeon 'buy in', funding sources, key challenges and others.  
28  
29  
30  
31  
32  
33  
34  
35  
36

### 37 **INTRODUCTION:**

38  
39  
40 The effective regulation of surgical implants is vital to patient safety. The Poly Implant  
41 Prothese (PIP) breast implant and metal-on-metal hip implant scandals have identified the  
42 risks of not gathering long term data on implants and surgical outcomes systematically.<sup>1,2</sup> As  
43 such, there is a UK and European-wide drive to establish surgical registries.<sup>3</sup> In the UK there  
44 are a number of well-known surgical registry initiatives including: the National Joint Registry  
45 (NJR), the National Hip Fracture Database (NHFD), the National Bariatric Surgery Registry  
46 (NBSR) and others. There are currently few registry initiatives in ENT Surgery, particularly  
47 within the field of hearing.  
48  
49  
50  
51  
52  
53  
54  
55  
56  
57  
58  
59  
60

1  
2  
3 Hearing loss is an area of unmet need<sup>4,5,6,7</sup> and industry is targeting this field with a growing  
4 range of surgically-implanted hearing devices.<sup>8,9,10,11</sup> Currently, there is no comprehensive  
5 UK-registry capturing data on these devices;<sup>10,12</sup> in its absence, it is difficult to monitor  
6 safety, practices and effectiveness.<sup>5,13</sup> A solution to this is developing a national registry of  
7 all auditory implants. However, developing and maintaining a surgical registry faces  
8 considerable challenges, with the majority of registries having poor rates of data completion  
9 and short life-spans.<sup>14,15</sup> In order to develop a successful surgical registry, it is important to  
10 learn from the experiences of previous and existing registries. In this systematic review, we  
11 aimed to identify the essential features of a successful surgical registry.  
12  
13  
14  
15  
16  
17  
18  
19

## 20 **MATERIALS AND METHODS**

### 21 **Registration**

22 This systematic review was registered on the PROSPERO database. Registration number:  
23  
24  
25  
26 CRD42016039793.  
27  
28  
29

### 30 **Design**

31 Systematic Review and Narrative Synthesis.  
32  
33  
34  
35

### 36 **Search strategy and selection criteria**

37 A systematic review was performed adhering to PRISMA recommendations.<sup>16</sup> With expert  
38 librarian support we designed and conducted a comprehensive search of the Medline and  
39 Embase databases from inception to November 2015 using the Ovid portal. An updated  
40 search was performed in November 2016. The search string used was ((surgery or surgical)  
41 AND (register or registers or registry or registries)) AND (britain\$ or "united kingdom\$" or uk  
42 or england\$ or northern ireland\$ or wales\$ or scotland\$). The full search strategy is  
43 provided in Appendix 1. All registry names identified in the screening process were noted  
44 and searched in the grey literature. Available national registry reports were reviewed from  
45 registry websites. We also visually scanned reference lists and searched relevant citations in  
46 the grey literature. Two authors (R.M and J.P) searched the literature independently and  
47 compared results at each stage of the PRISMA flowchart (Figure 1). A third author (A.S)  
48 arbitrated disagreements.  
49  
50  
51  
52  
53  
54  
55  
56  
57  
58  
59  
60

1  
2  
3  
4  
5 Criteria for publications to be included were: publications describing the design,  
6 development, critical analysis or current-status of a national surgical registry. Exclusion  
7 criteria were: non-English language; publications over ten years old; and publications  
8 describing non-surgical or non UK-registries.  
9  
10

### 11 12 13 **Data extraction and synthesis**

14  
15 A data extraction table was produced in Microsoft Excel, containing 20 column headings  
16 developed by the first author (R.M) (see Table 1). These headings were developed following  
17 immersion in the dataset and using thematic analysis to identify the key themes for data  
18 extraction. R.M extracted the data, allocating relevant information from each included  
19 publication to each of the data columns described in Table 1. A second author (J.P) cross-  
20 checked the development of the data extraction table and the data extraction and this  
21 process was discussed at two interim consensus meetings. Data were then synthesised by  
22 summarising the data under each column heading into a structured narrative, following the  
23 principles outlined by Popay et al.<sup>17</sup>  
24  
25  
26  
27  
28  
29  
30  
31  
32

### 33 **RESULTS**

34  
35  
36  
37 After duplicates were removed, titles and abstracts of 1389 publications were screened.  
38 Thirty-five additional records were identified from other sources. Fifty-nine publications  
39 fulfilled the criteria for analysis. After conducting our updated search, ten additional  
40 publications were included, resulting in 69 publications for analysis. See Figure 1 for the  
41 PRISMA flowchart.  
42  
43  
44  
45

46  
47 Included publications consisted of annual registry reports and analyses, registry overview  
48 documents, editorials, commentaries, registry proposal documents and registry review  
49 articles and covered a range of surgical specialities (see Table 2). Appendix 2 shows the full  
50 data extraction table, identifying the relevant information from each included publication.  
51  
52  
53  
54

55  
56 Below is a narrative synthesis of the full data extraction table. The numerical and  
57 alphabetical digits below correspond to the data extraction columns in Appendix 2.  
58  
59  
60

## Registry planning

### *Registry leadership and management (1.G)*

Registries are typically led by steering committees comprising professional and clinical stakeholders as well as patient representatives<sup>18-22</sup> Steering committees should have overall responsibility for registry design, data monitoring, data analysis<sup>23</sup> as well as strategic direction, oversight, and allocation of registry resources.<sup>19,21,24,25</sup>

It is important for registry management to receive input from both clinical and data management experts.<sup>26,27</sup> Local registry managers help maximise data completion and accuracy;<sup>21</sup> and private companies have been employed to successfully manage several UK-national registries.<sup>25,28-30</sup>

### *The objective(s) of a surgical registry (1.H)*

Registries should have a clear set of objectives from the outset; these often include: improving patient care, providing comparisons of standards, monitoring current practice, monitoring device durability and intervention performance, identifying variations in service provisioning as well as guiding commissioning and guideline development.<sup>12,19,20,22,30-32</sup> Other aims include gaining a better understanding of disease epidemiology<sup>19,21,33</sup> and promoting future research, innovation, efficiency, transparency and patient decision making.<sup>28,34-38</sup> The addition of objectives at a later stage, after the registry is established, will likely lead to challenges.<sup>12,14,15,32</sup> For instance, a registry developed to improve patient care will unlikely be successful in driving research, due to the registry not being developed to collect and report on data relevant to researchers.<sup>12,20,22,23</sup> Registries including the NHFD, NJR and NBSR have demonstrated that by setting clear objectives from the outset, and by involving key stakeholders including clinicians, patients, and researchers during registry development, a registry can successfully deliver on multiple objectives, including, improving patient care and driving research.<sup>20,25,27</sup>

### *Funding (1.J)*

Registries require considerable resources for initial set-up and ongoing maintenance.<sup>26</sup> Owing to implant lifespan, implant registries in particular should plan for long-term funding. Central funding sources include the Healthcare Quality Improvement Partnership (HQIP), NHS England, the Department of Health (DOH) and national commissioners.<sup>22,26,39</sup> Industry can also contribute to funding, although it is important to consider governance around industry access to registry data.<sup>21,29,40,41</sup> Other sources of funding include participating hospitals,<sup>21</sup> charities,<sup>42</sup> professional societies,<sup>43</sup> annual capitation fees,<sup>36</sup> and charging for data requests.<sup>26</sup> Registry costs can also be incorporated into the price of each implant.<sup>27</sup> Funding often comes from multiple sources.<sup>20,21,26,27,44</sup>

### *Establishing collaborations (1.F)*

It is important to form strategic national collaborations amongst stakeholders including: patient groups, clinicians, specialist societies, industry, commissioners, funding bodies, hospitals, academic groups and those involved in data collection and management.<sup>19,26,27,32</sup> Working with and learning from existing regional registries was a successful strategy adopted by the National Vascular Registry.<sup>45</sup> International collaborations can help align the registry with global surgical initiatives<sup>27,38,46</sup> and links with the implant industry can facilitate implant tracking.<sup>47</sup> Collaborations with national institutes including the National Institute for Health and Care Excellence (NICE) and the Royal Colleges can align registry data with national guidelines development and re-validation.<sup>19</sup> Collaborations with geriatrics societies and charities can help data collection on elderly patients.<sup>20</sup>

### *Registry development and design (1.I)*

Reaching stakeholder consensus on registry objectives, dataset and activities is essential.<sup>20,36,48</sup> The registry can be developed from existing smaller registries<sup>45</sup> and piloting the registry is important in obtaining user feedback.<sup>21,40,49-51</sup> Web-based electronic platforms facilitate quick and accurate data collection and tailored IT systems can be developed to

1  
2  
3 provide a secure, interactive and easy-to-use registry platform.<sup>20,29,30,50,52</sup> NICE advises that  
4 registries should be recorded on a national database of registers.<sup>23</sup>  
5  
6  
7

## 8 **Dataset and data management**

9

### 10 *Rationale behind a registry dataset (1.K)*

11

12  
13  
14  
15 It is advisable for datasets to be developed through stakeholder and patient consensus  
16 meetings,<sup>48,53,54</sup> with a balance between comprehensibility and feasibility: comprehensive  
17 datasets are unlikely to achieve data completion whilst limited datasets may be less  
18 useful.<sup>24,29,38</sup> Flexible datasets built with the ability to evolve can help promote registry  
19 longevity, but an initial period of consistency helps embed the registry.<sup>26,49</sup> It can also be  
20 useful to build upon existing registry datasets from the same speciality.<sup>28,46,51,54</sup>  
21  
22  
23  
24  
25  
26  
27

28 Whilst collecting quality of life (QoL) and patient reported outcomes (PRO) data is vital for  
29 evaluation of treatments and services,<sup>55,56</sup> collecting such data in the context of a national  
30 registry is resource intensive and may affect data completion.<sup>55</sup> Deciding which PROs to  
31 choose can also be an area of controversy and disagreement.<sup>55</sup> If PROs are introduced, it is  
32 advisable to keep the number of questions short and for these data to be collected directly  
33 from patients at regular, planned time points, rather than relying on clinic follow-ups.<sup>30,55</sup>  
34  
35  
36  
37  
38  
39

40 The design of registry datasets can accommodate national guideline  
41 recommendations;<sup>23,45,57,58</sup> for example the NHFD dataset is designed to facilitate easy  
42 comparison to NICE guidance,<sup>20</sup> and the National Vascular Registry adapted datasets to  
43 capture key issues highlighted by National Confidential Enquiry into Patient Outcomes and  
44 Deaths (NCEPOD).<sup>45</sup>  
45  
46  
47  
48

### 49 *Dataset (1.L)*

50

51  
52  
53  
54 Whilst specific registry data-items vary between surgical specialities; the majority of UK-  
55 surgical registries collect the pre-operative, operative and post-operative data-items  
56  
57  
58  
59  
60



1  
2  
3 summarised in Table 3. A free text box can also be included to capture additional relevant  
4 information.<sup>30</sup>  
5  
6  
7

#### 8 *Data processing (1.M)* 9

10  
11 To improve data quality and accuracy, data from participating centres should be internally  
12 validated by local registry managers and clinicians before being cleaned.<sup>21,59,60</sup> Data cleaning  
13 can take place locally or centrally and involves detecting and resolving data problems.<sup>26,28,32</sup>  
14 Prior to central analysis, data can be returned to each contributing centre to take any  
15 necessary remedial actions.<sup>26,53,59,61</sup> On site data verification by auditors is considered good  
16 practice.<sup>40,60,62</sup> Although these visits focus on completeness and accuracy of data, they also  
17 provide an important opportunity for education of clinicians and local registry managers  
18 adding to ongoing data quality<sup>40,48,60,62</sup> and for discussion with administrators about  
19 appropriate resources for information management.<sup>60</sup> Feedback through reports evaluating  
20 quality of local data collection can be sent to contributing centres to stimulate  
21 improvements; and independent validation of data including data completeness, mortality,  
22 readmission and revision can be achieved by linking registry patient records to the Office of  
23 National Statistics and Hospital Episode Statistics (HES).<sup>18,35,36,58,60,62,63</sup> NICE recommends  
24 that the process for data collection, storage and analysis should be independent of any  
25 particular company or commercial interest.<sup>23</sup>  
26  
27  
28  
29  
30  
31  
32  
33  
34  
35  
36  
37  
38  
39

#### 40 *Data reporting (1.P)* 41

42  
43 Registries usually publish information via annual on-line comprehensive reports,<sup>21,26,32,36,62-64</sup>  
44 research publications and presentations.<sup>27,39,62,65</sup> There is controversy surrounding the  
45 publication of surgeon specific data. Evidence suggests that publishing this data is  
46 associated with improvements in mortality<sup>62</sup> as well as increased transparency, patient trust  
47 and improved supervision of juniors surgeons,<sup>25,66</sup> with no evidence of 'risk-adverse' surgical  
48 behaviour.<sup>26,62,66</sup> When publishing surgeon specific outcomes, it is important to statistically  
49 adjust for case-mix, to take into account complex, high risk cases.<sup>63,66</sup> It is recommended  
50 that team level data are published to reflect that outcomes are dependent on the entire  
51 surgical team, not solely the consultant surgeon.<sup>66</sup> Minimising the time between the surgical  
52  
53  
54  
55  
56  
57  
58  
59  
60

1  
2  
3 event and the release of data is also important for the identification of faulty implants or  
4 unsafe practices.<sup>63</sup>  
5  
6  
7

## 8 **Challenges and data completion**

9

### 10 *Difficulties encountered/challenges (1.R)*

11

12  
13  
14  
15 Registries relying on voluntary data submission are dependent on user motivation and are  
16 unlikely to achieve complete data capture.<sup>35,56,67</sup> Voluntary data submission can also result  
17 in reporting bias with underreported complications and a non-consecutive, non-  
18 representative patient group.<sup>35,44,64</sup> Insufficient financial resources for registry development  
19 and maintenance is a frequent challenge<sup>56,68,69</sup> as is lack of stakeholder and patient 'buy-in,'  
20 resulting in poor data quality and completeness.<sup>22,31,43</sup> Registries can be perceived to worsen  
21 documentation pressures, which may compromise data recording and limit  
22 participation.<sup>22,51</sup> Reaching stakeholder consensus on the registry dataset is challenging;<sup>22,70</sup>  
23 and datasets with unclear definitions as well as those unable to adapt to changes in practice  
24 can result in difficulties in drawing national comparisons and tracking surgical  
25 activity.<sup>28,31,43,50,62</sup> Collecting long-term follow-up data can also be challenging, particularly  
26 when patients are under the care of multiple hospitals and clinicians.<sup>25,44,51,55,70</sup>  
27  
28  
29  
30  
31  
32  
33  
34  
35  
36  
37

### 38 *Strategies to increase data completion (1.N)*

39

40  
41  
42 Data completion can be optimised by careful registry design and by involving stakeholders  
43 throughout its development, promoting 'buy-in'.<sup>25,26</sup> An online registry that is user-friendly,  
44 multi-browser compatible, simple, quick-to-use, and has clear data definitions will increase  
45 data input.<sup>24,26,30</sup> Other optimisation strategies include real-time data input, reminders for  
46 mandatory fields, hover-tip prompts, on-screen data validation checks, numeric limits, auto-  
47 calculations, drop-down menus, calendar support, and limiting free-text fields.  
48  
49  
50  
51  
52  
53  
54  
55  
56  
57  
58  
59  
60

19,25,40,48,50,51,71 It is critical that data-input is supported by allocation of dedicated time and  
resources, regional training sessions, succinct user guides, real-time 'chat' support, as well  
as email and telephone support.<sup>19,22,40,43</sup> Mobile 'apps' allow easy remote registry access  
and can also help increase data completion.<sup>22,24,30,47</sup>

1  
2  
3  
4  
5 Registries that are of clear value to clinicians and institutions are more likely to achieve data  
6 completion.<sup>25,26,30,46</sup> For example, registry systems producing automated clinic letters or  
7 operation notes or that help record data for self-audit and revalidation are more likely to be  
8 used.<sup>18,25,35,37</sup> A research friendly registry can also help increase participation, particularly if  
9 registry contributors can be listed co-authors.<sup>41,65</sup>  
10  
11  
12  
13

14  
15 Regular performance feedback can help maintain local interest in the registry.<sup>18,19,55</sup> The  
16 NHFD produces online graphs with live data on performance, time-to-surgery, mortality,  
17 length-of-stay (LOS), best practice and patient safety.<sup>20</sup> The NJR has increased registry  
18 participation through a programme of local audits and by issuing data quality certificates  
19 that provide incentive to submit high quality data and highlight hospitals not complying with  
20 mandatory requirements. Another measure employed by the NJR is sharing cost-saving  
21 information on best implant prices, on the proviso that hospital trusts submit data to the  
22 NJR.<sup>27</sup>  
23  
24  
25  
26  
27  
28  
29  
30

31 Regular published reports and journal articles have been found to raise the profile of the  
32 registry, highlight non-participating units and increase data completeness and accuracy.<sup>60</sup>  
33 Advertising can increase awareness and participation via press coverage, emails, society  
34 bulletins, letters to eligible members, conferences, regional meetings, word-of-mouth and  
35 through journal advertisements.<sup>20,35,44,51,58,60,72</sup>  
36  
37  
38  
39  
40  
41

42 Making data input compulsory for revalidation or commissioning, or both, appears to be the  
43 most successful method of increasing data completion.<sup>19,25,27,51,60,62,67,22,70</sup>  
44  
45  
46

## 47 **Patient involvement and legal factors**

### 48 *Patient involvement (1.Q)*

49  
50  
51  
52  
53  
54 Patient involvement in registry leadership, design, development and reporting increases the  
55 relevance of the registry to patients, commissioners and policy makers.<sup>18,27,31,36,54</sup> Patients  
56 entering their own data via electronic patient portals can be particularly useful in collecting  
57  
58  
59  
60

1  
2  
3 QoL and long-term follow-up data.<sup>22,24,30,47,55</sup> To help increase registry patient participation  
4 it is important to acquire consent early, have a registry coordinator for patient follow-up,  
5 and have multiple language options.<sup>55</sup> Facilitating patient access to data promotes  
6 transparency, patient choice and involvement.<sup>27,62,63</sup>  
7  
8  
9

### 10 11 *Legal factors, ethics and data access (1.U)*

12  
13  
14  
15 UK-surgical registries must comply with DOH data protection and information governance  
16 legislation for secure processing of patient healthcare data.<sup>21,36,53</sup> This process can be guided  
17 by the Data Protection Act, General Medical Council (GMC) guidance, the Caldecott  
18 Confidentiality Principles and information found in the Information Governance Toolkit of  
19 the Health and Social Care Information Centre.<sup>36,39,73</sup> The registry should be implemented  
20 and reported in accordance with Declaration of Helsinki ethical principles.<sup>40</sup> Patient  
21 informed consent should be obtained for data submission and data should be anonymised  
22 in all cases.<sup>30,40,53,60,70</sup> Failure to function within a legal framework can result in legal  
23 termination with potential criminal repercussions.<sup>26</sup>  
24  
25  
26  
27  
28  
29  
30  
31  
32

33 Whilst easy access to the registry is essential,<sup>24</sup> data privacy should be maintained and data  
34 should be stored securely and not shared without appropriate permissions.<sup>22,26,32,36,63,70</sup> It is  
35 important for data release to be governed under a defined data-sharing agreement, where  
36 the security and uses of the data are clearly defined.<sup>19,21,36</sup> Registries can have  
37 subcommittees or data managing groups that are responsible for reviewing formal access  
38 requests and ethical assessment.<sup>19,29,36,40</sup>  
39  
40  
41  
42  
43  
44

### 45 **Registry success**

#### 46 47 48 *Benefits of registries (1.S)*

49  
50  
51  
52 Surgical registries can help underpin research including randomised controlled trials, assess  
53 and improve cost-effectiveness as well as inform risk-prediction models.<sup>26,36,47,74,75</sup> Other  
54 benefits include improved patient decision-making, treatment development, and  
55 identification of trends in practice.<sup>25,28,56</sup> Registries can facilitate inter(national) comparisons  
56  
57  
58  
59  
60

1  
2  
3 between centres as well as personal audit and revalidation.<sup>30,35,46,55,67,75</sup> Publically-accessible  
4 registries can increase public trust and promote transparency and patient choice.<sup>61</sup> With the  
5 growing number of surgical implants, registries can help identify both the highest  
6 performing and faulty implants.<sup>47,71,76</sup> The collection, feedback and publication of registry  
7 data is now a recognised way of informing clinical practice, driving quality improvement and  
8 improving patient care and safety.<sup>40,61,63,71</sup> Since the National Audit Cardiac Surgery (NACSA)  
9 registry was introduced, risk-adjusted in-hospital mortality for cardiac surgery in the UK has  
10 fallen by over 50% despite more elderly and high-risk patients having surgery each year.<sup>26</sup>  
11 Following the start of the NHFD, rates of early surgery increased from 54.5% to 71.3% and  
12 thirty-day mortality fell from 10.9% to 8.5%.<sup>20</sup>  
13  
14  
15  
16  
17  
18  
19  
20  
21

22 Registry data can support agencies to monitor and evaluate the quality of healthcare  
23 delivered.<sup>20</sup> They can also help identify national variations in service provisioning, map and  
24 evaluate patient pathways as well as inform health service commissioning and  
25 policy.<sup>37,45,56,58,71,74,77</sup> Regulatory organisations including NICE recognise the value of  
26 registries in technology assessment particularly in the absence of formal trials.<sup>23,44,70</sup> When  
27 compared to trials, registries require fewer resources and often collect data from a broader  
28 population base so their findings have strong external validity.<sup>41,78</sup> They also frequently  
29 provide data on long-term outcomes that exceed the study window of a trial.<sup>65</sup> They can be  
30 of particular value when investigating patient groups that are usually excluded from clinical  
31 trials such as the elderly.<sup>79</sup>  
32  
33  
34  
35  
36  
37  
38  
39  
40  
41

#### 42 *Measures of a successful registry (1.T)*

43  
44

45 A successful registry is one that is easily accessible, has a high degree of data completion  
46 and participation and helps promote inter(national) collaboration.<sup>22,26,63,68,69</sup> They provide  
47 timely feedback to their users, identify trends in practice, improve standards of care and  
48 identify failures at the earliest opportunity.<sup>20,48,63</sup> Successful registries are useful to their  
49 stakeholders and contain validated data that are accurate and easy to analyse.<sup>22,39,55,71,79</sup>  
50  
51  
52  
53  
54  
55  
56  
57  
58  
59  
60

## DISCUSSION

In this systematic review, we have identified the fundamentals for developing a successful UK-surgical registry. Whilst we highlight the need for a registry of auditory implants, our findings have implications to the wider surgical community since we provide information that can be used to inform the development of any UK-surgical registry.

### Summary of findings

The fundamentals to successful registry development identified by this synthesis are summarised in Figure 2 and include: steering committee to lead and oversee the registry; clear registry objectives; planning for initial and long-term funding; strategic national collaborations amongst key stakeholders; dedicated registry management team; consensus meetings to agree registry dataset; established data processing systems; anticipating challenges; implementing strategies to increase data completion. Patient involvement and awareness of legal factors should occur throughout the developmental process.

### Relevance to existing research

There is a clear need for surgical registry data to improve patient safety and help regulate surgical practices. Concerns over the evidence base for surgical implants in general has been raised by the IDEAL collaborative and the House of Commons Science and Technology committee.<sup>3,80</sup> Across the UK and EU, implants can enter surgical practice on the basis of equivalence data, meaning that an implant can be used on the basis of similarity to another implant rather than evidence of its own safety and effectiveness.<sup>3,80</sup> Transparency and post-market surveillance are additional concerns with data on safety and performance of implants not being fully published.<sup>3</sup> The recall of the PIP breast implants and metal on metal hip implants identify the dangers of relying on equivalence data for the evaluation of safety and efficacy.<sup>1,2</sup>

Owing to these concerns, the IDEAL collaborative, DOH, NICE, policymakers and commissioning groups have called for surgical registries that can collect prospective outcome and safety data, promote transparency as well as provide patients and the public with information on their care.<sup>3,8,11,80,81</sup> It has also been recognised that registry data can

1  
2  
3 serve as a valuable alternative to randomised trials, which can be unfeasible and of limited  
4 scientific use - particularly at the development stage of a surgical innovation.<sup>41,65</sup> When  
5 compared to trials, registries require fewer resources, have stronger external validity and  
6 tend to provide longer term outcome data.<sup>41,65</sup>  
7  
8  
9

### 10 11 12 **Implications**

13 This review provides evidence based knowledge on registry development that can be used  
14 by existing and developing UK-surgical registries to increase their chance of success.

15 Successful registries provide essential clinical and cost-effectiveness data for policy and  
16 guidelines development.<sup>26,47,74,75</sup> They also help develop (inter)national research  
17 collaborations as well as promote patient choice, trust and transparency.<sup>25,28,56,61</sup> Other  
18 implications include facilitating inter(national) benchmarking and personal audit.<sup>35,46,55,67,75</sup>

19 Successful registries help drive healthcare quality improvement, improve patient safety and  
20 allow commissioners and service providers to monitor quality, detect faulty implants early,  
21 monitor patient usage, identify variations in practice and allocate payments  
22 fairly.<sup>45,47,56,71,74,76</sup> From an international perspective, this review provides a methodological  
23 framework that can be adopted by other countries to promote successful national surgical  
24 registry development.  
25  
26  
27  
28  
29  
30  
31  
32  
33  
34  
35

### 36 37 **Strengths and limitations**

38 We acknowledge that the quality and reliability of included publications likely varied due to  
39 their heterogeneity; publications included: annual registry reports and analyses, registry  
40 overview documents, editorials, commentaries, registry proposal documents and registry  
41 review articles. In addition, owing to the nature of included publications, much of the data  
42 collected were from non-empirical, opinion based articles. This heterogeneous and non-  
43 empirical nature of included publications also precluded formal quality assessment. We  
44 recognise that the development of the data extraction table and the data extraction may  
45 have been influenced by researcher bias. However, to mitigate this, both stages were cross-  
46 checked by a second researcher and discussed at two interim consensus meetings. We also  
47 acknowledge that by excluding non-surgical registries, we may have failed to capture  
48 important information on registry development. Our decision was based on surgical  
49  
50  
51  
52  
53  
54  
55  
56  
57  
58  
59  
60

registries having specific attributes that we wanted to learn from including: datasets, strategies to increase surgeon 'buy in', funding sources, key challenges and others.

A key strength of this review is that it provides an evidence based foundation for the development of any surgical registry. We adopted a rigorous approach searching both the scientific and grey literature and used thematic analysis to develop our data extraction table. Moreover, data analyses at all stages were cross checked by a second judge and discussed at consensus meetings.

## CONCLUSION

This systematic review provides robust knowledge that can be used to inform the successful development of any UK-surgical registry. It also provides a methodological framework for international surgical registry development.

**Contributors:** R.M and J.P conducted the title, abstract and full-text review for this study, and performed the data extraction. All authors were involved in drafting the manuscript. R.M, A.K, A.S, E.M, P.L developed the search strategy. All authors were involved in conceiving the idea for this study and drafted major parts of the manuscript. All authors read and approved the final manuscript.

**Acknowledgements:** None

**Competing interests:** None declared

**Funding:** R.M was supported by a NICE Scholarship, a NIHR Academic Clinical Fellowship and a UCL Public Policy Grant. A.S was supported by a NIHR Research Professorship. A.K and P.L were supported by the NIHR Collaboration for Leadership in Applied Health Research and Care South London at King's College Hospital NHS Foundation Trust. Funders were not involved in study design, data collection, data analysis, manuscript preparation or publication. All authors had complete access to the study data that support the publication.



1  
2  
3 The views expressed are those of the author[s] and not necessarily those of the NHS, the  
4 NIHR or the Department of Health.  
5  
6  
7

8 **Provenance and peer review:** Not commissioned; externally peer reviewed.  
9

10  
11 **Data sharing statement:** No additional data available.  
12

## 13 REFERENCES

- 14  
15  
16  
17  
18  
19  
20 1 Oulharj S, Pauchot J, Tropet Y. PIP breast implant removal: a study of 828 cases.  
21  
22 *J Plast Reconstr Aesthet Surg* 2014;**67**:302–307.  
23  
24  
25 2 Smith AJ, Dieppe P, Vernon K, *et al*. Failure rates of stemmed metal-on-metal  
26  
27 hip replacements: analysis of data from the National Joint Registry of England  
28  
29 and Wales. *Lancet* 2012;**379**:1199–1204.  
30  
31  
32  
33 3 House of Commons Science and Technology Committee (2012). Regulation of  
34  
35 Medical Implants in the UK and EU;  
36  
37 [http://www.publications.parliament.uk/pa/cm201213/cmselect/cmsstech/163/](http://www.publications.parliament.uk/pa/cm201213/cmselect/cmsstech/163/163.pdf)  
38  
39 [163.pdf](http://www.publications.parliament.uk/pa/cm201213/cmselect/cmsstech/163/163.pdf) [accessed 12 October 2016]  
40  
41  
42  
43  
44 4 Hearing loss: an important global health concern. *Lancet* 2016;**387**:2351.  
45  
46  
47 5 Committee on Accessible and Affordable Hearing Health Care for Adults, Board  
48  
49 on Health Sciences Policy, Health and Medicine Division, National Academies of  
50  
51 Sciences, Engineering, and Medicine. Hearing Health Care for Adults [Internet].  
52  
53 Blazer DG, Domnitz S, Liverman CT, editors. Washington, D.C: National  
54  
55 Academies Press; 2016. <http://www.nap.edu/23446> [accessed 2 November  
56  
57  
58  
59  
60

- 1  
2  
3 2016]
- 4  
5  
6 6 Leverton T. Hearing loss is important in dementia. *BMJ* 2015;**350**:h3650.  
7  
8  
9  
10 7 Lamb B, ONeill C, Atkins J. The Real Cost of Adult Hearing Loss. Ear Foundation  
11  
12 2014. <http://www.earfoundation.org.uk/news/articles> [accessed 5 November  
13  
14 2016]
- 15  
16  
17 8 Department of Health. Action Plan on Hearing Loss 2015.  
18  
19 [https://www.england.nhs.uk/wp-content/uploads/2015/03/act-plan-hearing-](https://www.england.nhs.uk/wp-content/uploads/2015/03/act-plan-hearing-loss-upd.pdf)  
20  
21 [loss-upd.pdf](https://www.england.nhs.uk/wp-content/uploads/2015/03/act-plan-hearing-loss-upd.pdf) 13 [accessed 12 November 2016]  
22  
23  
24  
25 9 NHS England 2016 Clinical Commissioning Policy: Bone conducting hearing  
26  
27 implants (BCHIs) for hearing loss (all ages).  
28  
29 [https://www.england.nhs.uk/commissioning/wp-](https://www.england.nhs.uk/commissioning/wp-content/uploads/sites/12/2013/05/16041_FINAL.pdf)  
30  
31 [content/uploads/sites/12/2013/05/16041\\_FINAL.pdf](https://www.england.nhs.uk/commissioning/wp-content/uploads/sites/12/2013/05/16041_FINAL.pdf) [accessed 15 August 2016]  
32  
33  
34  
35 10 NHS Commissioning Board (2013). Clinical Commissioning Policy: Bone  
36  
37 Anchored Hearing Aids. [https://www.england.nhs.uk/wp-](https://www.england.nhs.uk/wp-content/uploads/2013/04/d09-p-a.pdf)  
38  
39 [content/uploads/2013/04/d09-p-a.pdf](https://www.england.nhs.uk/wp-content/uploads/2013/04/d09-p-a.pdf) [accessed 15 August 2016]  
40  
41  
42  
43 11 National Institute of Health & Care Excellence. Cochlear implants for children  
44  
45 and adults with severe to profound deafness. NICE technology appraisal  
46  
47 guidance 2009 [TA166].  
48  
49  
50  
51  
52 12 Ear Foundation. National Bone Conducting Hearing Implant Registry.  
53  
54 [http://www.earfoundation.org.uk/hearing-technologies/bone-conducting-](http://www.earfoundation.org.uk/hearing-technologies/bone-conducting-hearing-implants/national-bone-conducting-hearing-implant-registry)  
55  
56 [hearing-implants/national-bone-conducting-hearing-implant-registry](http://www.earfoundation.org.uk/hearing-technologies/bone-conducting-hearing-implants/national-bone-conducting-hearing-implant-registry) [accessed  
57  
58  
59  
60

1  
2  
3 14 September 2016]  
4  
5

- 6 13 GENERATE. The Research Agenda for ENT, Hearing and Balance Care. A UK  
7  
8 Partnership of Patients, Professionals and the Public.  
9  
10 [https://entuk.org/sites/default/files/files/Research%20Agenda%20ENT%20Hear](https://entuk.org/sites/default/files/files/Research%20Agenda%20ENT%20Hearing%20and%20Balance%2030%2011%2015.pdf)  
11 [ing%20and%20Balance%2030%2011%2015.pdf](https://entuk.org/sites/default/files/files/Research%20Agenda%20ENT%20Hearing%20and%20Balance%2030%2011%2015.pdf) [accessed 14<sup>th</sup> September 2016]  
12  
13  
14  
15  
16 14 Gliklich RE, Dreyer NA, Leavy MB. Registries for Evaluating Patient Outcomes: A  
17  
18 User's Guide, 3rd edn. Rockville (MD): Agency for Healthcare Research and  
19  
20 Quality (US), 2014  
21  
22  
23  
24 15 Workman TA. Engaging Patients in Information Sharing and Data Collection: The  
25  
26 Role of Patient-Powered Registries and Research Networks. Rockville (MD):  
27  
28 Agency for Healthcare Research and Quality (US), 2013  
29  
30  
31  
32 16 Moher D, Altman DG, Liberati A, *et al.* PRISMA statement. *Epidemiology*.  
33  
34 2011;**22**:128–authorreply128.  
35  
36  
37  
38 17 Popay J, Roberts H, Sowden A, *et al.* Guidance on the conduct of Narrative  
39  
40 Synthesis in Systematic review. A Product from the ESRC methods programme  
41  
42 (2009).  
43  
44 [http://www.lancaster.ac.uk/shm/research/nssr/research/dissemination/publica](http://www.lancaster.ac.uk/shm/research/nssr/research/dissemination/publications/NS_Synthesis_Guidance_v1.pdf)  
45  
46 [tions/NS\\_Synthesis\\_Guidance\\_v1.pdf](http://www.lancaster.ac.uk/shm/research/nssr/research/dissemination/publications/NS_Synthesis_Guidance_v1.pdf) [accessed 10 October 2016]  
47  
48  
49  
50 18 NELA Project Board. National Emergency Laparotomy Audit (NELA) Protocol  
51  
52 2014.  
53  
54  
55  
56 19 Ludman PF. The UK transcatheter aortic valve implantation registry; one of the  
57  
58  
59  
60

- 1  
2  
3 suite of registries hosted by the National Institute for Cardiovascular Outcomes  
4  
5 Research (NICOR). *Heart* 2012;**98**:1787–1789.  
6  
7  
8  
9 20 National Hip Fracture Database NHFD workstream delivery team. National Hip  
10  
11 Fracture Registry Annual Report 2015.  
12  
13  
14 21 Koliass AG, Bulters DO, Cowie CJ, *et al.* Proposal for establishment of the UK  
15  
16 Cranial Reconstruction Registry (UKCRR). *Br J Neurosurg* 2014;**28**:310–314.  
17  
18  
19  
20 22 Breakwell LM, Cole AA, Birch N, *et al.* Should we all go to the PROM? The first  
21  
22 two years of the British Spine Registry. *Bone Joint J* 2015;**97-B**:871–874.  
23  
24  
25  
26 23 National Institute for Health and Care Excellence. Interventional procedures  
27  
28 programme manual. 2016. [https://www.nice.org.uk/process/pmg/chapter/draft-](https://www.nice.org.uk/process/pmg/chapter/draft-recommendations/data-collection-to-address-uncertainty)  
29  
30 [recommendations/data-collection-to-address-uncertainty](https://www.nice.org.uk/process/pmg/chapter/draft-recommendations/data-collection-to-address-uncertainty) [accessed 16<sup>th</sup>  
31  
32 November 2016]  
33  
34  
35  
36 24 Gabr A, O'Leary S, Spalding T, *et al.* The UK National Ligament Registry Report  
37  
38 2015. *Knee* 2015;**22**:351–353.  
39  
40  
41  
42 25 Welbourn R, Small P, Finlay I, *et al.* The UK national bariatric surgery registry:  
43  
44 The second report 2014.  
45  
46  
47  
48 26 Hickey GL, Grant SW, Cosgriff R, *et al.* Clinical registries: governance,  
49  
50 management, analysis and applications. *Eur J Cardiothorac Surg* 2013;**44**:605–  
51  
52 614.  
53  
54  
55  
56 27 The NJR Editorial Board. National Joint Registry 12th Annual Report.  
57  
58  
59  
60

- 1  
2  
3 28 Head SJ, Howell NJ, Osnabrugge RLJ, *et al.* The European Association for Cardio-  
4 Thoracic Surgery (EACTS) database: an introduction. *Eur J Cardiothorac Surg*  
5 2013;**44**:e175–e180.  
6  
7  
8  
9  
10  
11 29 Chadwick D, Kinsman R, Walton P. The British Association of Endocrine and  
12 Thyroid Surgeons 4th National Audit Report. 2012.  
13  
14  
15  
16  
17 30 Hazari A, Walton P. The UK National Flap Registry (UKNFR): A National Database  
18 for all pedicled and free flaps in the UK. *J Plast Reconstr Aesthet Surg*.  
19 2015;**68**:1633–1636.  
20  
21  
22  
23  
24  
25 31 Briggs V, Pitcher D, Shaw C, *et al.* UK Renal Registry 16th annual report: chapter  
26 14 2012 multisite dialysis access audit in England, Northern Ireland and Wales  
27 and 2011 PD one year follow-up: national and centre-specific analyses. *Nephron*  
28 *Clin Pract.* 2013;**125**:275–294.  
29  
30  
31  
32  
33  
34  
35 32 Connolly SS, Rochester MA. Nephroureterectomy surgery in the UK in 2012:  
36 British Association of Urological Surgeons (BAUS) Registry data. *BJU Int*  
37 2015;**116**:780–790.  
38  
39  
40  
41  
42  
43 33 Berven SH, Yaszemski MJ, Newton PO, *et al.* Introduction of new devices and  
44 technologies into a spine surgery practice: a review of processes and  
45 regulations. *Orthopedics* 2010;**33**:742–747.  
46  
47  
48  
49  
50  
51 34 Mason RH, Foley NM, Branley HM, *et al.* Pulmonary Langerhans cell  
52 histiocytosis (PLCH): a new UK register. *Thorax* 2014;**69**:766–767.  
53  
54  
55  
56  
57 35 Armitage JN, Irving SO, Burgess NA. Percutaneous nephrolithotomy in the  
58  
59  
60

- 1  
2  
3 United kingdom: results of a prospective data registry. *Eur Urol* 2012;**61**:1188–  
4  
5 1193.  
6  
7  
8  
9 36 Caskey F, Castledine C, Dawney A, *et al.* UK Renal Registry 18th Annual Report  
10  
11 2016.  
12  
13  
14 37 Auditbase. Advanced clinic management (2016).  
15  
16 <https://www.auditdata.com/all-products-and-services/clinic->  
17  
18 [management/auditbase](https://www.auditdata.com/all-products-and-services/clinic-) [accessed 23 October 2016]  
19  
20  
21  
22 38 Yung M, Gjuric M, Haeusler R, *et al.* An international otology database. *Otol*  
23  
24 *Neurotol* 2005;**26**:1087–1092.  
25  
26  
27  
28 39 Shakespeare PG, Bazire N, Whitworth IH. The UK breast implant registry-ten  
29  
30 years on. *Br J Plast Surg* 2005;**58**:283–285.  
31  
32  
33  
34 40 Bulusu VR, Fullarton J, Leahy M, *et al.* Rationale and design of a UK database for  
35  
36 a rare cancer type: the GEM Registry for gastrointestinal stromal tumours. *Br J*  
37  
38 *Cancer* 2013;**109**:1403–1407.  
39  
40  
41  
42 41 Elson DW, Dawson M, Wilson C, *et al.*. The UK Knee Osteotomy Registry  
43  
44 (UKKOR). *Knee* 2015;**22**:1–3.  
45  
46  
47  
48 42 Bates T, Kearins O, Monypenny I, *et al.* Clinical outcome data for symptomatic  
49  
50 breast cancer: the Breast Cancer Clinical Outcome Measures (BCCOM) Project.  
51  
52 *Br J Cancer* 2009;**101**:395–402.  
53  
54  
55  
56 43 Uberoi R, Das N, Moss J, *et al.* British Society of Interventional Radiology: Biliary  
57  
58 Drainage and Stenting Registry (BDSR). *Cardiovasc Intervent Radiol*  
59  
60

- 1  
2  
3 2012;**35**:127–138.  
4  
5  
6  
7 44 Thomas SM, Beard JD, Ireland M, *et al*. Results from the prospective registry of  
8  
9 endovascular treatment of abdominal aortic aneurysms (RETA): mid term  
10  
11 results to five years. *Eur J Vasc Endovasc Surg* 2005;**29**:563–570.  
12  
13  
14 45 Clinical Effectiveness Unit, The Royal College of Surgeons of England. National  
15  
16 Vascular Registry 2015 Annual Report.  
17  
18  
19  
20 46 de Steur WO, Henneman D, Allum WH, *et al*. Common data items in seven  
21  
22 European oesophagogastric cancer surgery registries: towards a European  
23  
24 upper GI cancer audit (EURECCA Upper GI). *Eur J Surg Oncol* 2014;**40**:325–329.  
25  
26  
27  
28 47 Breakwell LM. Understanding the need for spinal registries: Lee Breakwell  
29  
30 reviews the importance of registries in spinal research and explains why the  
31  
32 British Association of Spinal Surgeons (BASS) has decided to set up its own  
33  
34 registry. *Eur Spine J* 2013;**22 Suppl 1**:S5–S6.  
35  
36  
37  
38 48 Yung M, Heyning PV de. A prospective multicentre otology database. *Adv*  
39  
40  
41 *Otorhinolaryngol* 2007;**65**:335–339.  
42  
43  
44 49 Sher JL, Reed MR, Calvert P, *et al*. Influencing the national training agenda. The  
45  
46 UK & Ireland orthopaedic eLogbook. *J Bone Joint Surg Br* 2005;**87**:1182–1186.  
47  
48  
49  
50 50 Chalmers N, Jones K, Drinkwater K, *et al*. The UK nephrostomy audit. Can a  
51  
52 voluntary registry produce robust performance data? *Clin Radiol* 2008;**63**:888–  
53  
54 894.  
55  
56  
57  
58 51 Mangera A, B P. BAUS Section of Endourology national Uteroscopy audit:  
59  
60

- 1  
2  
3 setting the standards for revalidation. *Journal of clinical urology* 2013;6:45–49.  
4  
5  
6  
7 52 PELICAN cancer foundation. LOREC APE Perineal Wound Registry.  
8  
9 <http://www.lorec.nhs.uk/system/content.asp?pkey=17> [accessed 20 October  
10  
11 2016]  
12  
13  
14 53 Moat NE, Ludman P, de Belder MA, *et al.* Long-term outcomes after  
15  
16 transcatheter aortic valve implantation in high-risk patients with severe aortic  
17  
18 stenosis: the U.K. TAVI (United Kingdom Transcatheter Aortic Valve  
19  
20 Implantation) Registry. *J Am Coll Cardiol* 2011;58:2130–2138.  
21  
22  
23  
24 54 Briggs V, Pitcher D, Braddon F, *et al.* UK Renal Registry 15th annual report:  
25  
26 Chapter 8 UK multisite peritoneal dialysis access catheter audit for first PD  
27  
28 catheters 2011. *Nephron Clin Pract* 2013;123 Suppl 1:165–181.  
29  
30  
31  
32  
33 55 Franklin PD, Harrold L, Ayers DC. Incorporating patient-reported outcomes in  
34  
35 total joint arthroplasty registries: challenges and opportunities. *Clin Orthop*  
36  
37 *Relat Res* 2013;471:3482–3488.  
38  
39  
40  
41 56 Bates T, Kearins O, Monypenny I, *et al.* Clinical outcome data for symptomatic  
42  
43 breast cancer: the Breast Cancer Clinical Outcome Measures (BCCOM) Project.  
44  
45 *Br J Cancer* 2009;101:395–402.  
46  
47  
48  
49 57 National Bowel Cancer Audit Project Team. The National Bowel Cancer Audit  
50  
51 report 2015.  
52  
53  
54  
55 58 Health and Social Care Information Centre. National Head and Neck Cancer  
56  
57 Audit 2014.  
58  
59  
60



- 1  
2  
3 59 Head SJ, Howell NJ, Osnabrugge RLJ, *et al.* The European Association for Cardio-  
4 Thoracic Surgery (EACTS) database: an introduction. *Eur J Cardiothorac Surg*  
5 2013;**44**:e175–e180.  
6  
7  
8  
9  
10  
11 60 Clarke DR, Breen LS, Jacobs ML, *et al.* Verification of data in congenital cardiac  
12 surgery. *Cardiol Young* 2008;**18 Suppl 2**:177–187.  
13  
14  
15  
16  
17 61 Hickey GL, Cosgriff R, Grant SW, *et al.* A technical review of the United Kingdom  
18 National Adult Cardiac Surgery Governance Analysis 2008-11. *Eur J Cardiothorac*  
19 *Surg* 2014;**45**:225–233.  
20  
21  
22  
23  
24  
25 62 Bridgewater B. Cardiac registers: the adult cardiac surgery register. *Heart*  
26 2010;**96**:1441–1443.  
27  
28  
29  
30  
31 63 Jacobs ML, Jacobs JP, Franklin RCG, *et al.* Databases for assessing the outcomes  
32 of the treatment of patients with congenital and paediatric cardiac disease--the  
33 perspective of cardiac surgery. *Cardiol Young* 2008;**18 Suppl 2**:101–115.  
34  
35  
36  
37  
38  
39 64 Wyatt MG. Registries versus trials for the evaluation of the endovascular  
40 treatment of abdominal aortic aneurysms. *Eur J Vasc Endovasc Surg*  
41 2005;**29**:560–562.  
42  
43  
44  
45  
46  
47 65 Biancari F, Ruggieri VG, Perrotti A, *et al.* European Multicenter Study on  
48 Coronary Artery Bypass Grafting (E-CABG registry): Study Protocol for a  
49 Prospective Clinical Registry and Proposal of Classification of Postoperative  
50 Complications. *J Cardiothorac Surg* 2015;**10**:90.  
51  
52  
53  
54  
55  
56  
57 66 Chou E, Abboudi H, Shamim Khan M, *et al.* Should surgical outcomes be  
58  
59  
60

- 1  
2  
3 published? *J R Soc Med* 2015;**108**:127–135.  
4  
5  
6  
7 67 Divecha HM, Siddique I, Breakwell LM, *et al*. Complications in spinal deformity  
8 surgery in the United Kingdom: 5-year results of the annual British Scoliosis  
9 Society National Audit of Morbidity and Mortality. *Eur Spine J* 2014;**23**  
10 **Suppl1**:S55–S60.  
11  
12  
13  
14  
15  
16  
17 68 Sharma S, Dreghorn CR. Registry of shoulder arthroplasty - the Scottish  
18 experience. *Ann R Coll Surg Engl* 2006;**88**:122–126.  
19  
20  
21  
22  
23 69 Hussey K, Siddiqui T, Burton P, *et al*. Understanding administrative abdominal  
24 aortic aneurysm mortality data. *Eur J Vasc Endovasc Surg* 2015;**49**:277–282.  
25  
26  
27  
28  
29 70 Hopkins J, Welbourn R. The importance of national registries/databases in  
30 metabolic surgery: the UK experience. *Surg Obes Relat Dis* 2016;**12**:1178–1185.  
31  
32  
33  
34 71 Goldberg AJ, MacGregor A, Spencer SA. An information revolution in  
35 orthopaedics. *J Bone Joint Surg Br* 2012;**94**:454–458.  
36  
37  
38  
39  
40 72 Knight JS, Senapati A, Lamparelli MJ. National UK audit of procedure for  
41 prolapsing haemorrhoids on behalf of the Association of Coloproctology of  
42 Great Britain and Ireland. *Colorectal Dis* 2008;**10**:440–445.  
43  
44  
45  
46  
47  
48 73 Health and Social Care Information Centre. Information Governance Toolkit.  
49 <https://www.igt.hscic.gov.uk> [accessed 23 March 2016]  
50  
51  
52  
53 74 Patrick H, Sims A, Burn J, *et al*. Monitoring the use and outcomes of new devices  
54 and procedures: how does coding affect what Hospital Episode Statistics  
55 contribute? Lessons from 12 emerging procedures 2006-10. *J Public Health*  
56  
57  
58  
59  
60

- 1  
2  
3 (Oxf) 2013;**35**:132–138.  
4  
5  
6  
7 75 Larsson S, Lawyer P, Garellick G, *et al*. Use of 13 disease registries in 5 countries  
8 demonstrates the potential to use outcome data to improve health care's value.  
9  
10  
11 *Health Aff (Millwood)* 2012;**31**:220–227.  
12  
13  
14 76 O'Dowd A. Government considers a national implant register in review of  
15 cosmetic procedures. *BMJ* 2012;**345**:e5574.  
16  
17  
18  
19  
20 77 Sabah SA, Henckel J, Koutsouris S, *et al*. Are all metal-on-metal hip revision  
21 operations contributing to the National Joint Registry implant survival curves? :  
22 a study comparing the London Implant Retrieval Centre and National Joint  
23 Registry datasets. *Bone Joint J* 2016;**98-B**:33–39.  
24  
25  
26  
27  
28  
29  
30 78 Suradi HS, Hijazi ZM. TAVR update: Contemporary data from the UK TAVI and  
31 US TVT registries. *Glob Cardiol Sci Pract* 2015;**2015**:21.  
32  
33  
34  
35  
36 79 van Gijn W, van de Velde CJH. Quality assurance through outcome registration  
37 in colorectal cancer: an ECCO initiative for Europe. *Acta Chir Iugosl* 2010;**57**:17–  
38 21.  
39  
40  
41  
42  
43  
44 80 McCulloch P, Cook JA, Altman DG, *et al*. IDEAL framework for surgical  
45 innovation 1: the idea and development stages. *BMJ* 2013;**346**:f3012.  
46  
47  
48  
49  
50 81 NHS Commissioning Board. Clinical Commissioning Policy: Active Middle Ear  
51 Implants. [https://www.england.nhs.uk/commissioning/wp-](https://www.england.nhs.uk/commissioning/wp-content/uploads/sites/12/2013/04/d09-ps-a.pdf)  
52 [content/uploads/sites/12/2013/04/d09-ps-a.pdf](https://www.england.nhs.uk/commissioning/wp-content/uploads/sites/12/2013/04/d09-ps-a.pdf) [accessed 13 November 2016]  
53  
54  
55  
56  
57  
58  
59  
60

**Table 1: Data column headings and their descriptions**

| Dataset column headings                | Description                                                                                     |
|----------------------------------------|-------------------------------------------------------------------------------------------------|
| Author(s)                              | Author of article                                                                               |
| Title                                  | Title of article                                                                                |
| Year                                   | Year of publication                                                                             |
| Name of registry                       | Name of registry                                                                                |
| Type of surgery                        | Operation(s) captured by the registry                                                           |
| Collaborations                         | Collaborations developed for the registry                                                       |
| Registry leadership and management     | How the registry was managed and/or lead                                                        |
| Objective(s)                           | The objective(s) of the registry                                                                |
| Registry development and/or design     | How the registry was developed and/or designed                                                  |
| Funding                                | How the registry was funded                                                                     |
| Rationale behind dataset               | The rationale behind selecting the registry dataset                                             |
| Dataset                                | The dataset of the registry                                                                     |
| Data processing                        | How the registry data were processed                                                            |
| Strategies to increase data completion | Strategies used/found by the registry to increase data completion                               |
| Data reporting                         | How the registry reported/disseminated their results                                            |
| Patient involvement                    | How patients were involved in the registry and viewpoints on patient involvement in registries. |
| Difficulties encountered/challenges    | Difficulties and challenges encountered by the registry                                         |
| Benefits of registries                 | The benefits of the registry                                                                    |
| Measures of a successful registry      | Factors that determine a successful registry                                                    |
| Legal factors, ethics and data access  | Legal factors, ethics and data access for the registry                                          |

**Table 2: Represented surgical specialities**

| <b>Surgical specialty</b> |
|---------------------------|
| Orthopaedics              |
| Renal Surgery             |
| Neurosurgery              |
| Cardiac Surgery           |
| Upper GI Surgery          |
| Urology                   |
| Plastic Surgery           |
| Breast Surgery            |
| Colorectal Surgery        |
| Cardiothoracic Surgery    |
| Vascular Surgery          |
| Endocrine surgery         |
| ENT Surgery               |

For peer review only

1  
2  
3  
4  
5  
6  
7  
8  
9  
10  
11  
12  
13  
14  
15  
16  
17  
18  
19  
20  
21  
22  
23  
24  
25  
26  
27  
28  
29  
30  
31  
32  
33  
34  
35  
36  
37  
38  
39  
40  
41  
42  
43  
44  
45  
46  
47  
48  
49  
50  
51  
52  
53  
54  
55  
56  
57  
58  
59  
60

Table 3: The data-items collected by the majority of UK surgical registries

| Pre-operative                            | Operative                                 | Post-operative                     |
|------------------------------------------|-------------------------------------------|------------------------------------|
| Name of centre                           | Name of operation                         | Outcome data specific to operation |
| Patient identifier                       | Time to surgery from first appointment    | QOL/PRO outcome measure            |
| Patient demographics                     | Type of anaesthetic (local or general)    | Date of discharge                  |
| Patient co-morbidities                   | ASA grade                                 | Length of stay                     |
| Whether discussed at MDT meeting         | Thromboprophylaxis regimen                | Complications                      |
| Indication for surgery                   | Primary or revision case                  | Morbidity                          |
| Date of diagnosis                        | Elective or emergency surgery             | Mortality (and cause)              |
| Pre-operative investigations and results | Date of surgery                           | Dates of follow-up                 |
| Date of admission                        | In or out of regular hospital hours       | Follow-up outcomes                 |
| GP information                           | Site/side of surgery                      | Need for further treatment         |
|                                          | Surgical technique/approach               | Need for further surgery           |
|                                          | Difficulty of procedure                   | ITU admission (planned/unplanned)  |
|                                          | Intraoperative problems                   | Destination of discharge           |
|                                          | Date of consent                           |                                    |
|                                          | Grade of surgeon                          |                                    |
|                                          | Surgical time                             |                                    |
|                                          | Funding for operation (NHS/private)       |                                    |
|                                          | Use of antibiotics                        |                                    |
|                                          | Type of implant and implant serial number |                                    |

GP General Practitioner, MDT multidisciplinary team, ASA American Society of Anaesthesiologists, QOL quality of life, PRO patient reported outcome, ITU intensive therapy unit

1  
2  
3  
4  
5  
6  
7  
8  
9  
10  
11  
12  
13  
14  
15  
16  
17  
18  
19  
20  
21  
22  
23  
24  
25  
26  
27  
28  
29  
30  
31  
32  
33  
34  
35  
36  
37  
38  
39  
40  
41  
42  
43  
44  
45  
46  
47  
48  
49  
50  
51  
52  
53  
54  
55  
56  
57  
58  
59  
60

**Figure legends**

Figure 1: PRISMA Diagram

Figure 2: Overview of the key steps required for the development of a successful UK surgical registry

For peer review only

1  
2  
3  
4  
5  
6  
7  
8  
9  
10  
11  
12  
13  
14  
15  
16  
17  
18  
19  
20  
21  
22  
23  
24  
25  
26  
27  
28  
29  
30  
31  
32  
33  
34  
35  
36  
37  
38  
39  
40  
41  
42  
43  
44  
45  
46  
47  
48  
49  
50  
51  
52  
53  
54  
55  
56  
57  
58  
59  
60



Figure 1

209x296mm (300 x 300 DPI)



1  
2  
3  
4  
5  
6  
7  
8  
9  
10  
11  
12  
13  
14  
15  
16  
17  
18  
19  
20  
21  
22  
23  
24  
25  
26  
27  
28  
29  
30  
31  
32  
33  
34  
35  
36  
37  
38  
39  
40  
41  
42  
43  
44  
45  
46  
47  
48  
49  
50  
51  
52  
53  
54  
55  
56  
57  
58  
59  
60



Figure 2

338x190mm (300 x 300 DPI)

review only

## Appendix 1

Ovid Medline and Embase search strategy:

1. (britain\$ OR "united kingdom\$" OR uk or england\$ OR northern ireland\$ OR wales\$ OR scotland\$).mp. [mp=ti, ab, hw, tn, ot, dm, mf, dv, kw, fx, nm, kf, px, rx, an, ui, sy]
2. (surgery OR surgical).mp. [mp=ti, ab, hw, tn, ot, dm, mf, dv, kw, fx, nm, kf, px, rx, an, ui, sy]
3. (register OR registers OR registry OR registries).mp. [mp=ti, ab, hw, tn, ot, dm, mf, dv, kw, fx, nm, kf, px, rx, an, ui, sy]
4. 1 AND 2 AND 3

1  
2  
3  
4  
5  
6  
7  
8  
9  
10  
11  
12  
13  
14  
15  
16  
17  
18  
19  
20  
21  
22  
23  
24  
25  
26  
27  
28  
29  
30  
31  
32  
33  
34  
35  
36  
37  
38  
39  
40  
41  
42  
43  
44  
45  
46  
47

| A                                                                | B                                                                                                                                  | C    | D                                                                     | E                                                | F              | G                                                                                      | H                                                                                                                                                                                                                                            | I                               | J                                                                                                                                                                                                                                                                       | K                                                                                                                                                                                                                                                                                      | L                                                                                                                                                                                                                                                                                                                                                                                                                                                          | M                                                                 | N                                                                                                                                                                                                                                                                                                                                                                                                                                                                                               | O                                                                                                                                                                                                                                                                                                                                                                                                                                                         | P              | Q                                 | R                                        | S                      | T                                 | U                                                                     |
|------------------------------------------------------------------|------------------------------------------------------------------------------------------------------------------------------------|------|-----------------------------------------------------------------------|--------------------------------------------------|----------------|----------------------------------------------------------------------------------------|----------------------------------------------------------------------------------------------------------------------------------------------------------------------------------------------------------------------------------------------|---------------------------------|-------------------------------------------------------------------------------------------------------------------------------------------------------------------------------------------------------------------------------------------------------------------------|----------------------------------------------------------------------------------------------------------------------------------------------------------------------------------------------------------------------------------------------------------------------------------------|------------------------------------------------------------------------------------------------------------------------------------------------------------------------------------------------------------------------------------------------------------------------------------------------------------------------------------------------------------------------------------------------------------------------------------------------------------|-------------------------------------------------------------------|-------------------------------------------------------------------------------------------------------------------------------------------------------------------------------------------------------------------------------------------------------------------------------------------------------------------------------------------------------------------------------------------------------------------------------------------------------------------------------------------------|-----------------------------------------------------------------------------------------------------------------------------------------------------------------------------------------------------------------------------------------------------------------------------------------------------------------------------------------------------------------------------------------------------------------------------------------------------------|----------------|-----------------------------------|------------------------------------------|------------------------|-----------------------------------|-----------------------------------------------------------------------|
| Author                                                           | Title                                                                                                                              | Year | Name of registry/type of paper                                        | Type of surgery                                  | Collaborations | Registry leadership and management                                                     | Objective(s)                                                                                                                                                                                                                                 | Registry development and design | Funding                                                                                                                                                                                                                                                                 | Rationale behind dataset                                                                                                                                                                                                                                                               | Dataset                                                                                                                                                                                                                                                                                                                                                                                                                                                    | Data processing                                                   | Strategies to increase data completion                                                                                                                                                                                                                                                                                                                                                                                                                                                          | Data completeness                                                                                                                                                                                                                                                                                                                                                                                                                                         | Data reporting | Patient involvement               | Difficulties encountered/challenges      | Benefits of registries | Measures of a successful registry | Legal factors, ethics and data access                                 |
| Gabr A.<br>O'Leary S.<br>Spalding T.<br>Bollen S.<br>Haddad F.   | The UK National Ligament Registry Report 2015                                                                                      | 2015 | UK National Ligament Registry (NLR)                                   | Anterior cruciate ligament reconstruction (ACLR) | NS             | Steering committee group comprising of surgeons - no initial involvement of government | To collect relevant demographic data, identify current or emergent trends in practice, identify failing techniques/devices at the earliest opportunity, provide functional outcome data and complication rates, improve the standard of care | Web based platform              | Involving physical therapists with enrich dataset. Industry (6 companies, priming grant from British Association for Knee Surgery BASK) - Industry will be provided with information on the performance of their products. They will not be able to access the raw data | Need to have a balance between level of ideal data and what surgeons and patients can easily submit. The data set allows comparison and communication with existing registries as well as allowing potential 'generic health benefit' comparisons with other non-orthopedic procedures | Demographics, cause of injury, time from injury to surgery; graft data (type of graft, diameter), BMI, surgical technique; outcome data relating to ACLR, knee injury and osteoarthritis outcome score, subjective International Knee Documentation Committee, Euroqol (EQSD) and the Tegner activity score, in which centre procedure performed.                                                                                                          | NS                                                                | User-friendly web based platform - easily accessible via computer or tablet, simplifying the process for clinicians and patients; Has a registry 'route' - requiring small contributions from patients and surgeons at different stages; Has automatic prompts for patients to fill in their information at scheduled times of treatment and rehabilitation, taking the hassle and stress out of clinical data collection for clinicians; Readymade tool for use in governance and revalidation | 17,800 completed forms. 2854 ACLR procedures registered between Dec 2012 and Feb 2015. Estimated that there are 30,000 patients a year in the UK undergoing ACLR                                                                                                                                                                                                                                                                                          | NS             | Patients can insert data via apps | NS                                       | NS                     | NS                                | May be useful to introduce mobile apps for surgeons use to enter data |
| Hing C.B.<br>Stiehl J.B.                                         | Editorial                                                                                                                          | 2015 | Commentary                                                            | NS                                               | NS             | NS                                                                                     | NS                                                                                                                                                                                                                                           | NS                              | NS                                                                                                                                                                                                                                                                      | NS                                                                                                                                                                                                                                                                                     | NS                                                                                                                                                                                                                                                                                                                                                                                                                                                         | Registries rely on accurate robust data entry and correct support | NS                                                                                                                                                                                                                                                                                                                                                                                                                                                                                              | NS                                                                                                                                                                                                                                                                                                                                                                                                                                                        | NS             | NS                                | NS                                       | NS                     | NS                                | NS                                                                    |
| Briggs V.<br>Pitcher D.<br>Braddon F.<br>Fogarty D.<br>Wilkie M. | UK renal registry 15th annual report: Chapter 8 UK multisite peritoneal dialysis access catheter audit for first PD catheters 2011 | 2011 | UK renal registry Multisite peritoneal dialysis access catheter audit | Peritoneal dialysis access.                      | NS             | NS                                                                                     | Data acquisition relating to peritoneal dialysis functionality and access                                                                                                                                                                    | NS                              | Health quality improvement partnership (HQIIP)                                                                                                                                                                                                                          | Data fields were refined from existing renal registry tables. Data fields were adjusted based on meetings with a multisite audit group including patient representation.                                                                                                               | Demographic data, age at first dialysis of each centre, size of centre, referral time/interval, underlying disease, catheter insertion technique, referral time, commencement date of dialysis, deprivation quintiles, catheter survival at 3 months, length of time known to nephrology service, date catheter used, date of catheter failure, BMI, date seen by renal physician, surgical referral, peritoneal dialysis catheter outcomes, complications | Excel spreadsheets circulated by the UK renal registry.           | NS                                                                                                                                                                                                                                                                                                                                                                                                                                                                                              | 43/65 centres contacted submitted data. Data completeness by center ranged from 0% to 100% for almost all data fields that were collected. Data RE: underlying renal disease not available for 13% of patients. Data not available from some renal networks RE referral time. *considerable missing data* RE surgical referral. Missing data RE insertion technique in 37 patients. Missing data in 209/916 patients RE whether or not they were diabetic | NS             | NS                                | Patient involved in refining data fields | NS                     | NS                                | NS                                                                    |



1  
2  
3  
4  
5  
6  
7  
8  
9  
10  
11  
12  
13  
14  
15  
16  
17  
18  
19  
20  
21  
22  
23  
24  
25  
26  
27  
28  
29  
30  
31  
32  
33  
34  
35  
36  
37  
38  
39  
40  
41  
42  
43  
44  
45  
46  
47

|           |                                                                              |      |                                                                                                                    |                                                                                                       |                                                                                                                                                                              |                                                                                                                                                                                                                                                                                                                                                                                                                                                                                    |                                                                                                                                                                                                                                                                                                                                                                                                                                                                                                                                                                                                                                                                                                                                                                                                                              |                                                                                                                                                                                                                                                                                                                                                                                                                                                                                                                                                                                                                                                                                                                                                                         |                                                                                                                                                                                              |          |                                                                                                                                                                                                                                                                                                                                                                                                                                                                                                                                                                                                                                                                                                                                                                                                                                                                                                                                                                                                                                                                                                                                                                                                                                                                                                                                                                                                      |    |                |                                                                                                                                                                                                                                                                                                                          |    |    |    |    |                                                                                                                                                                                                                                                                                                                                            |
|-----------|------------------------------------------------------------------------------|------|--------------------------------------------------------------------------------------------------------------------|-------------------------------------------------------------------------------------------------------|------------------------------------------------------------------------------------------------------------------------------------------------------------------------------|------------------------------------------------------------------------------------------------------------------------------------------------------------------------------------------------------------------------------------------------------------------------------------------------------------------------------------------------------------------------------------------------------------------------------------------------------------------------------------|------------------------------------------------------------------------------------------------------------------------------------------------------------------------------------------------------------------------------------------------------------------------------------------------------------------------------------------------------------------------------------------------------------------------------------------------------------------------------------------------------------------------------------------------------------------------------------------------------------------------------------------------------------------------------------------------------------------------------------------------------------------------------------------------------------------------------|-------------------------------------------------------------------------------------------------------------------------------------------------------------------------------------------------------------------------------------------------------------------------------------------------------------------------------------------------------------------------------------------------------------------------------------------------------------------------------------------------------------------------------------------------------------------------------------------------------------------------------------------------------------------------------------------------------------------------------------------------------------------------|----------------------------------------------------------------------------------------------------------------------------------------------------------------------------------------------|----------|------------------------------------------------------------------------------------------------------------------------------------------------------------------------------------------------------------------------------------------------------------------------------------------------------------------------------------------------------------------------------------------------------------------------------------------------------------------------------------------------------------------------------------------------------------------------------------------------------------------------------------------------------------------------------------------------------------------------------------------------------------------------------------------------------------------------------------------------------------------------------------------------------------------------------------------------------------------------------------------------------------------------------------------------------------------------------------------------------------------------------------------------------------------------------------------------------------------------------------------------------------------------------------------------------------------------------------------------------------------------------------------------------|----|----------------|--------------------------------------------------------------------------------------------------------------------------------------------------------------------------------------------------------------------------------------------------------------------------------------------------------------------------|----|----|----|----|--------------------------------------------------------------------------------------------------------------------------------------------------------------------------------------------------------------------------------------------------------------------------------------------------------------------------------------------|
| Kolb M.S. | Proposal for establishment of the UK cranial reconstruction registry (UKCRR) | 2014 | UK Cranial Reconstruction registry (UKCRR). Proposal for the establishment of a UK cranial reconstruction registry | Cranioplasty. Reconstruction of the skull vault with autologous bone, titanium or synthetic material. | British Neurotrauma Group, the British Neurosurgical Trainee Research Collaborative (BNTRC), the UK Neurosurgical Research Network, Society of British Neurological Surgeons | Each participating unit will appoint a consultant and a trainee responsible for co-ordinating the UKCRR at a local level. The UKCRR Steering Committee will have the overall responsibility for oversight of the registry. Steering Committee meetings to assess progress will take place at 6 and 12 months after the national rollout. A Steering Committee, which will include stakeholders will be responsible for overseeing the strategic direction and running of the UKCRR | To monitor practice patterns, complication rates and establish benchmarks for future studies. To provide information on variations in practice and outcomes between different units. To generate hypotheses for future research studies. Ultimate aim is to improve outcomes for patients. Specific objectives of the UKCRR are to: Monitor the demography, contemporary practice patterns, long-term clinical outcome and complication rates of cranioplasties across the UK. 2) Collect PROMs with a special focus on functional outcome, quality of life and satisfaction with cosmesis. 3) Provide aggregate data of implant usage and lifespan (implant survival) for long-term surveillance to manufacturers (commercial and in-house), clinicians, healthcare planners, regulatory authorities and other stakeholders | The UKCRR will be developed under the auspices of the British Neurotrauma Group (a special interest group of the Society of British Neurological Surgeons), the British Neurosurgical Trainee Research Collaborative (BNTRC) and the UK Neurosurgical Research Network. The registry will operate under the umbrella of the National Neurosurgical Audit Programme of the Society of British Neurological Surgeons. The feasibility of prospective data collection will be piloted in a number of selected units to refine the dataset on user experience and feedback. The pilot phase is expected to last 2-3 months. The principles of the UKCRR were discussed and agreed during past meetings of the British Neurotrauma Group and the launch meeting of the BNTRC | Cost of development and maintenance to be met by participating hospitals with supplier contributions using the UK shunt registry funding model. Industry will make some funding contribution | BMJ Open | Demographics, indication for craniectomy, site of skin incision, material used for duroplasty, type of material laid over the brain, time interval between craniectomy and cranioplasty, comorbidities, ASA class, neurological status, PROMs (functional outcome, quality of life, satisfaction with cosmesis). Operative data including: number of surgeons, grade of most senior surgeon, morning or afternoon operating list, size of cranial defect, site of cranioplasty, type of cranioplasty (including material, design and manufacturing), simultaneous insertion of CSF shunt (if applicable), surgical time, antibiotic prophylaxis, conventional or laminar flow ventilation theatre, wound infiltration with local anaesthetic, type of antiseptic used for skin preparation, distance of brain surface from inner table of skull, part of implant placed under temporis (if applicable), method used to secure implant, insertion of wound drain (suction or passive) and method for closing wound. Outcome measures: Re-operation due to a cranioplasty-related issue, surgical site infection, re-admission due to a cranioplasty-related issue, unplanned post-operative escalation of care, morbidity, length of stay, destination at discharge, mortality, neurological status, PROMs (functional outcome, quality of life, satisfaction with cosmesis) during routine follow-up | NS | Not active yet | Annual reports including a summary of cranioplasties (material, time interval after craniectomy, patient characteristics), outcomes post cranioplasty, description of key outcome indicators (i.e. risk-adjusted re-operation and surgical site infection) at unit level, description of data completeness at unit level | NS | NS | NS | NS | The ORION platform complies with the Department of Health Information Governance policies and standards for secure processing of patient healthcare data as set out in the Information Governance Toolkit of the Health and Social Care Information Centre. Each participating unit will be the data controller for its own submitted data |
|-----------|------------------------------------------------------------------------------|------|--------------------------------------------------------------------------------------------------------------------|-------------------------------------------------------------------------------------------------------|------------------------------------------------------------------------------------------------------------------------------------------------------------------------------|------------------------------------------------------------------------------------------------------------------------------------------------------------------------------------------------------------------------------------------------------------------------------------------------------------------------------------------------------------------------------------------------------------------------------------------------------------------------------------|------------------------------------------------------------------------------------------------------------------------------------------------------------------------------------------------------------------------------------------------------------------------------------------------------------------------------------------------------------------------------------------------------------------------------------------------------------------------------------------------------------------------------------------------------------------------------------------------------------------------------------------------------------------------------------------------------------------------------------------------------------------------------------------------------------------------------|-------------------------------------------------------------------------------------------------------------------------------------------------------------------------------------------------------------------------------------------------------------------------------------------------------------------------------------------------------------------------------------------------------------------------------------------------------------------------------------------------------------------------------------------------------------------------------------------------------------------------------------------------------------------------------------------------------------------------------------------------------------------------|----------------------------------------------------------------------------------------------------------------------------------------------------------------------------------------------|----------|------------------------------------------------------------------------------------------------------------------------------------------------------------------------------------------------------------------------------------------------------------------------------------------------------------------------------------------------------------------------------------------------------------------------------------------------------------------------------------------------------------------------------------------------------------------------------------------------------------------------------------------------------------------------------------------------------------------------------------------------------------------------------------------------------------------------------------------------------------------------------------------------------------------------------------------------------------------------------------------------------------------------------------------------------------------------------------------------------------------------------------------------------------------------------------------------------------------------------------------------------------------------------------------------------------------------------------------------------------------------------------------------------|----|----------------|--------------------------------------------------------------------------------------------------------------------------------------------------------------------------------------------------------------------------------------------------------------------------------------------------------------------------|----|----|----|----|--------------------------------------------------------------------------------------------------------------------------------------------------------------------------------------------------------------------------------------------------------------------------------------------------------------------------------------------|



|             |                                                                        |      |                                                                                                                               |                                                                     |                                                                                                                                                                                                                                                                                                                                                                             |                                                                                                                                                                                                                                                                                                                                                                                                                                                                                                                                              |    |                                                                                         |    |                                                                                                                                                                                                                                                                                                                                                                                                                                                                                                                                                                                                                                                         |    |                                                                                                                                                                                                                                                                                                                                                                                                                                                                                                                                                                                                                                                                                          |    |                                                                                                                                                                                                                                                                                                                                                                                                                                                                                                                                                                                                                                                                                                                                                                                                                                                                                                                                                                                                                                                                                                                                                                  |    |                                                                                                                                                                                                                                                                                                                                                                                                                                                                                                                                                                                                                                                                                                                                                                                                                                                    |    |                                                  |    |                                                                                                                                              |    |                                                                                                                                                                                                                                                         |    |                                                                                                                                                                                                                                                                                                                                                                                                                                                                                                                                                                                                                                                                                                                                                                                                                                                                                                                                                                                                                                                                                                                                                                                                                            |    |                                                                                                                                               |    |                                                                                                                                                                                                                                                                                                                                                                                                                                                                                                                                                                                                                                                                                                                                                                                                                                                   |
|-------------|------------------------------------------------------------------------|------|-------------------------------------------------------------------------------------------------------------------------------|---------------------------------------------------------------------|-----------------------------------------------------------------------------------------------------------------------------------------------------------------------------------------------------------------------------------------------------------------------------------------------------------------------------------------------------------------------------|----------------------------------------------------------------------------------------------------------------------------------------------------------------------------------------------------------------------------------------------------------------------------------------------------------------------------------------------------------------------------------------------------------------------------------------------------------------------------------------------------------------------------------------------|----|-----------------------------------------------------------------------------------------|----|---------------------------------------------------------------------------------------------------------------------------------------------------------------------------------------------------------------------------------------------------------------------------------------------------------------------------------------------------------------------------------------------------------------------------------------------------------------------------------------------------------------------------------------------------------------------------------------------------------------------------------------------------------|----|------------------------------------------------------------------------------------------------------------------------------------------------------------------------------------------------------------------------------------------------------------------------------------------------------------------------------------------------------------------------------------------------------------------------------------------------------------------------------------------------------------------------------------------------------------------------------------------------------------------------------------------------------------------------------------------|----|------------------------------------------------------------------------------------------------------------------------------------------------------------------------------------------------------------------------------------------------------------------------------------------------------------------------------------------------------------------------------------------------------------------------------------------------------------------------------------------------------------------------------------------------------------------------------------------------------------------------------------------------------------------------------------------------------------------------------------------------------------------------------------------------------------------------------------------------------------------------------------------------------------------------------------------------------------------------------------------------------------------------------------------------------------------------------------------------------------------------------------------------------------------|----|----------------------------------------------------------------------------------------------------------------------------------------------------------------------------------------------------------------------------------------------------------------------------------------------------------------------------------------------------------------------------------------------------------------------------------------------------------------------------------------------------------------------------------------------------------------------------------------------------------------------------------------------------------------------------------------------------------------------------------------------------------------------------------------------------------------------------------------------------|----|--------------------------------------------------|----|----------------------------------------------------------------------------------------------------------------------------------------------|----|---------------------------------------------------------------------------------------------------------------------------------------------------------------------------------------------------------------------------------------------------------|----|----------------------------------------------------------------------------------------------------------------------------------------------------------------------------------------------------------------------------------------------------------------------------------------------------------------------------------------------------------------------------------------------------------------------------------------------------------------------------------------------------------------------------------------------------------------------------------------------------------------------------------------------------------------------------------------------------------------------------------------------------------------------------------------------------------------------------------------------------------------------------------------------------------------------------------------------------------------------------------------------------------------------------------------------------------------------------------------------------------------------------------------------------------------------------------------------------------------------------|----|-----------------------------------------------------------------------------------------------------------------------------------------------|----|---------------------------------------------------------------------------------------------------------------------------------------------------------------------------------------------------------------------------------------------------------------------------------------------------------------------------------------------------------------------------------------------------------------------------------------------------------------------------------------------------------------------------------------------------------------------------------------------------------------------------------------------------------------------------------------------------------------------------------------------------------------------------------------------------------------------------------------------------|
| Hickey G.L. | Clinical registries: Governance, management, analysis and applications | 2013 | Review on establishing and managing registries. Uses many examples from National Adult Cardiac Surgery Audit (NACSA) registry | General review on registries but mainly focuses on cardiac registry | Stakeholders in NACSA registry, DoH commissioners, HQIP: The Healthcare Quality Improvement Partnership, SCTS (Society for Cardiothoracic Surgery in GB and Ireland), NICOR: National Institute for Cardiovascular Outcomes Research, NIGB: National Information Governance Board, Cardiac Surgery Centres, Surgeons, Database managers, Academic groups, Commercial groups | NACSA managed by National Institute of Cardiovascular Outcomes Research (NICOR). For NACSA database, most centres in the UK employ a local database manager who has responsibility for working with the surgeons to ensure that data collection is complete and robust. Database managers monitor data completeness rates and effective data management is a vital aspect of any large clinical registry. For registries to be effective, dedicated clinical input alongside high-level analytical and data management expertise is required | NS | This review covers the fundamentals of establishing and maintaining clinical registries | NS | Registries require considerable resources, infrastructure and funding to survive long term. Funding can come from: government budgets; professional societies; local health-care commissioner s. The value of the data can be exploited as a source of revenue. The Society of Thoracic Surgeons (STS) have identified two revenue sources for their national database: (i) non-funded major or minor data requests and (ii) regional activities. The first source allows for researchers to access information from the database. The second would allow for regional governments to access high-quality reports in order to steer health-care policy. | NS | The NACSA dataset has 168 data fields. Half the fields are 'branched', meaning that they are only relevant for specific procedures. Fields are classified into patient identifiers, patient characteristics, medical history, preoperative measurements, intraoperative fields and postoperative fields. Cardiac surgical procedures are categorized into four major groups: coronary artery bypass graft (CABG), valve, major aortic and other cardiothoracic procedures. Indication of a procedure within one of these groups unlocks further branched fields. For example, indicating a patient had a CABG procedure would unlock fields to allow completion of the number of grafts. | NS | For NACSA: Data are collected through local specialised database systems developed either commercially or locally. The data remain in the centres for internal validation and local auditing. Data are then uploaded to central servers housed at NICOR. A sophisticated registry-import software tool flags data issues. Data are then merged into a single file structure and encrypted. Data then undergo cleaning and validation. It is very important to be able to clean the data. Simply removing records or fields that do not fully meet standards of accuracy and coherency will lead to an increase in bias. Data cleaning is the process of detecting and resolving data problems to improve data quality. Appropriate resources must be allocated to this process, which will usually require the attention of experienced clinicians and database managers. Data validation is important to ensure that the data are accurate for reporting. Following local and external validation, summaries of centre- and surgeon-specific data are returned to individual centres for validation. Following this, data can be released to the public domain. | NS | Achieving and maintaining high participation rates rely heavily on the perceived value of the outputs generated. Keep the registry simple - as the number of records, data fields and complexity of the registry increases, the data decreases. Have comprehensive 'user guides' for contributors, technical and clinical helpline, training, feedback mechanisms and communication plans. Problems most commonly occur at the data input stage. Data inputted using handwritten data-forms are more likely to contain inaccurate information than software systems that capture the required dataset. Human error can also lead to data extractions for researchers being unknowingly corrupted. For example variables that list multiple options separated by a marker might be arbitrarily truncated, meaning that not all data are transmitted | NS | The NACSA database contains over 450,000 records | NS | Publishing mortality results by named centre/surgeon might encourage risk-averse clinical decision-making. However evidence is inconclusive. | NS | Examples of errors from NACSA include patients who have their heights recorded as negative values (e.g. -160cm), procedures on five valves, deceased patients being discharged home and aortic root replacements being performed on the abdominal aorta | NS | Improves quality of patient care, underpins research, improves cost-effectiveness, provides information for regulatory process. Other benefits include improvements in informed patient decision making, improvements in treatment and advances in health-care research and governance. Since the NACSA registry was introduced, risk-adjusted in-hospital mortality in the UK has fallen by >50% despite more elderly and high-risk patients having surgery each year. It is increasingly accepted that the collection and feedback of data and publishing them openly, is an effective way of driving quality improvement. Registries can be used for audit purposes, surgical epidemiology, clinical hypothesis testing, risk-prediction models (eg in cardiac surgery used to estimate short term mortality post surgery), epidemiological research, health services research (including variations in patient access to care), and identification of health care inequalities. Clinical registries are considered the gold standard of observational data. There have been an increasing number of devices implanted into patients. Registries would allow the earlier detection of unacceptable failure rates eg PIP | NS | The success of a clinical registry project can be measured on the database completeness s. Accessibility of information and proven usefulness | NS | Failure to do so can be a terminal event for any registry with potential criminal or political repercussions. There have been conflicting legal views on the interpretation of UK laws for practice in health-care research which has disrupted a number of registry projects due to lack of legal clarification. There should be ethical use of data and appropriate intellectual property rights. Data privacy should be maintained and data should be protected. Patients' personal data should be accurately collected and stored securely and not shared without appropriate permissions. It is important that any release of data (including to third parties responsible for analysis or publication) is done under a defined data-sharing agreement, whereby the security, planned uses, control and fate of the data are clearly defined |
|-------------|------------------------------------------------------------------------|------|-------------------------------------------------------------------------------------------------------------------------------|---------------------------------------------------------------------|-----------------------------------------------------------------------------------------------------------------------------------------------------------------------------------------------------------------------------------------------------------------------------------------------------------------------------------------------------------------------------|----------------------------------------------------------------------------------------------------------------------------------------------------------------------------------------------------------------------------------------------------------------------------------------------------------------------------------------------------------------------------------------------------------------------------------------------------------------------------------------------------------------------------------------------|----|-----------------------------------------------------------------------------------------|----|---------------------------------------------------------------------------------------------------------------------------------------------------------------------------------------------------------------------------------------------------------------------------------------------------------------------------------------------------------------------------------------------------------------------------------------------------------------------------------------------------------------------------------------------------------------------------------------------------------------------------------------------------------|----|------------------------------------------------------------------------------------------------------------------------------------------------------------------------------------------------------------------------------------------------------------------------------------------------------------------------------------------------------------------------------------------------------------------------------------------------------------------------------------------------------------------------------------------------------------------------------------------------------------------------------------------------------------------------------------------|----|------------------------------------------------------------------------------------------------------------------------------------------------------------------------------------------------------------------------------------------------------------------------------------------------------------------------------------------------------------------------------------------------------------------------------------------------------------------------------------------------------------------------------------------------------------------------------------------------------------------------------------------------------------------------------------------------------------------------------------------------------------------------------------------------------------------------------------------------------------------------------------------------------------------------------------------------------------------------------------------------------------------------------------------------------------------------------------------------------------------------------------------------------------------|----|----------------------------------------------------------------------------------------------------------------------------------------------------------------------------------------------------------------------------------------------------------------------------------------------------------------------------------------------------------------------------------------------------------------------------------------------------------------------------------------------------------------------------------------------------------------------------------------------------------------------------------------------------------------------------------------------------------------------------------------------------------------------------------------------------------------------------------------------------|----|--------------------------------------------------|----|----------------------------------------------------------------------------------------------------------------------------------------------|----|---------------------------------------------------------------------------------------------------------------------------------------------------------------------------------------------------------------------------------------------------------|----|----------------------------------------------------------------------------------------------------------------------------------------------------------------------------------------------------------------------------------------------------------------------------------------------------------------------------------------------------------------------------------------------------------------------------------------------------------------------------------------------------------------------------------------------------------------------------------------------------------------------------------------------------------------------------------------------------------------------------------------------------------------------------------------------------------------------------------------------------------------------------------------------------------------------------------------------------------------------------------------------------------------------------------------------------------------------------------------------------------------------------------------------------------------------------------------------------------------------------|----|-----------------------------------------------------------------------------------------------------------------------------------------------|----|---------------------------------------------------------------------------------------------------------------------------------------------------------------------------------------------------------------------------------------------------------------------------------------------------------------------------------------------------------------------------------------------------------------------------------------------------------------------------------------------------------------------------------------------------------------------------------------------------------------------------------------------------------------------------------------------------------------------------------------------------------------------------------------------------------------------------------------------------|

1  
2  
3  
4  
5  
6  
7  
8  
9  
10  
11  
12  
13  
14  
15  
16  
17  
18  
19  
20  
21  
22  
23  
24  
25  
26  
27  
28  
29  
30  
31  
32  
33  
34  
35  
36  
37  
38  
39  
40  
41  
42  
43  
44  
45  
46  
47



|    |                |                                                                                                                                                                                                                               |      |                                                                              |                 |                                                                                                                                                                                                                     |    |                                                                                                                                                                                                                             |    |                                                                                                                                                                                                                                                                                  |    |                                                                              |                                                                                                                                                                                                                                                                                                                                                                                                                                                                                                                                                                                                                                                                                                                                                                                                                                                                     |    |                                                                                                                                                                                                                                                                                                                                                                                                                                                                                                                                                                                                                                                                                                                                                             |                                                                                                                                                                                |    |                                                              |                                                                                                                                           |                                                                                                                                                                                                                                                                                                                                            |    |                                                                                                                                                                                                                                                                                 |
|----|----------------|-------------------------------------------------------------------------------------------------------------------------------------------------------------------------------------------------------------------------------|------|------------------------------------------------------------------------------|-----------------|---------------------------------------------------------------------------------------------------------------------------------------------------------------------------------------------------------------------|----|-----------------------------------------------------------------------------------------------------------------------------------------------------------------------------------------------------------------------------|----|----------------------------------------------------------------------------------------------------------------------------------------------------------------------------------------------------------------------------------------------------------------------------------|----|------------------------------------------------------------------------------|---------------------------------------------------------------------------------------------------------------------------------------------------------------------------------------------------------------------------------------------------------------------------------------------------------------------------------------------------------------------------------------------------------------------------------------------------------------------------------------------------------------------------------------------------------------------------------------------------------------------------------------------------------------------------------------------------------------------------------------------------------------------------------------------------------------------------------------------------------------------|----|-------------------------------------------------------------------------------------------------------------------------------------------------------------------------------------------------------------------------------------------------------------------------------------------------------------------------------------------------------------------------------------------------------------------------------------------------------------------------------------------------------------------------------------------------------------------------------------------------------------------------------------------------------------------------------------------------------------------------------------------------------------|--------------------------------------------------------------------------------------------------------------------------------------------------------------------------------|----|--------------------------------------------------------------|-------------------------------------------------------------------------------------------------------------------------------------------|--------------------------------------------------------------------------------------------------------------------------------------------------------------------------------------------------------------------------------------------------------------------------------------------------------------------------------------------|----|---------------------------------------------------------------------------------------------------------------------------------------------------------------------------------------------------------------------------------------------------------------------------------|
| 1  |                |                                                                                                                                                                                                                               |      |                                                                              |                 |                                                                                                                                                                                                                     |    |                                                                                                                                                                                                                             |    |                                                                                                                                                                                                                                                                                  |    |                                                                              |                                                                                                                                                                                                                                                                                                                                                                                                                                                                                                                                                                                                                                                                                                                                                                                                                                                                     |    |                                                                                                                                                                                                                                                                                                                                                                                                                                                                                                                                                                                                                                                                                                                                                             |                                                                                                                                                                                |    |                                                              |                                                                                                                                           |                                                                                                                                                                                                                                                                                                                                            |    |                                                                                                                                                                                                                                                                                 |
| 2  |                |                                                                                                                                                                                                                               |      |                                                                              |                 |                                                                                                                                                                                                                     |    |                                                                                                                                                                                                                             |    |                                                                                                                                                                                                                                                                                  |    |                                                                              |                                                                                                                                                                                                                                                                                                                                                                                                                                                                                                                                                                                                                                                                                                                                                                                                                                                                     |    |                                                                                                                                                                                                                                                                                                                                                                                                                                                                                                                                                                                                                                                                                                                                                             |                                                                                                                                                                                |    |                                                              |                                                                                                                                           |                                                                                                                                                                                                                                                                                                                                            |    |                                                                                                                                                                                                                                                                                 |
| 3  |                |                                                                                                                                                                                                                               |      |                                                                              |                 |                                                                                                                                                                                                                     |    |                                                                                                                                                                                                                             |    |                                                                                                                                                                                                                                                                                  |    |                                                                              |                                                                                                                                                                                                                                                                                                                                                                                                                                                                                                                                                                                                                                                                                                                                                                                                                                                                     |    |                                                                                                                                                                                                                                                                                                                                                                                                                                                                                                                                                                                                                                                                                                                                                             |                                                                                                                                                                                |    |                                                              |                                                                                                                                           |                                                                                                                                                                                                                                                                                                                                            |    |                                                                                                                                                                                                                                                                                 |
| 4  |                |                                                                                                                                                                                                                               |      |                                                                              |                 |                                                                                                                                                                                                                     |    |                                                                                                                                                                                                                             |    |                                                                                                                                                                                                                                                                                  |    |                                                                              |                                                                                                                                                                                                                                                                                                                                                                                                                                                                                                                                                                                                                                                                                                                                                                                                                                                                     |    |                                                                                                                                                                                                                                                                                                                                                                                                                                                                                                                                                                                                                                                                                                                                                             |                                                                                                                                                                                |    |                                                              |                                                                                                                                           |                                                                                                                                                                                                                                                                                                                                            |    |                                                                                                                                                                                                                                                                                 |
| 5  |                |                                                                                                                                                                                                                               |      |                                                                              |                 |                                                                                                                                                                                                                     |    |                                                                                                                                                                                                                             |    |                                                                                                                                                                                                                                                                                  |    |                                                                              |                                                                                                                                                                                                                                                                                                                                                                                                                                                                                                                                                                                                                                                                                                                                                                                                                                                                     |    |                                                                                                                                                                                                                                                                                                                                                                                                                                                                                                                                                                                                                                                                                                                                                             |                                                                                                                                                                                |    |                                                              |                                                                                                                                           |                                                                                                                                                                                                                                                                                                                                            |    |                                                                                                                                                                                                                                                                                 |
| 6  |                |                                                                                                                                                                                                                               |      |                                                                              |                 |                                                                                                                                                                                                                     |    |                                                                                                                                                                                                                             |    |                                                                                                                                                                                                                                                                                  |    |                                                                              |                                                                                                                                                                                                                                                                                                                                                                                                                                                                                                                                                                                                                                                                                                                                                                                                                                                                     |    |                                                                                                                                                                                                                                                                                                                                                                                                                                                                                                                                                                                                                                                                                                                                                             |                                                                                                                                                                                |    |                                                              |                                                                                                                                           |                                                                                                                                                                                                                                                                                                                                            |    |                                                                                                                                                                                                                                                                                 |
| 7  |                |                                                                                                                                                                                                                               |      |                                                                              |                 |                                                                                                                                                                                                                     |    |                                                                                                                                                                                                                             |    |                                                                                                                                                                                                                                                                                  |    |                                                                              |                                                                                                                                                                                                                                                                                                                                                                                                                                                                                                                                                                                                                                                                                                                                                                                                                                                                     |    |                                                                                                                                                                                                                                                                                                                                                                                                                                                                                                                                                                                                                                                                                                                                                             |                                                                                                                                                                                |    |                                                              |                                                                                                                                           |                                                                                                                                                                                                                                                                                                                                            |    |                                                                                                                                                                                                                                                                                 |
| 8  | Breakwell L.M. | Understanding the need for spinal registries: Lee Breakwell reviews the importance of registries in spinal research and explains why the British Association of Spinal Surgeons (BASS) has decided to set up its own registry | 2013 | Commentary on why and how the BASS decided set up the British Spine Registry | Spine           | Association of British Healthcare Industries (ABHI) has enabled listing of the majority of the available spinal implants. This enables access to data on usage and helps identify national outcomes                 | NS | To enable assessments of certain procedure types, and their outcome. To create a secure, comprehensive database, to allow individual surgeons and their teams to collect prospective data in a convenient and timely manner | NS | A subcommittee was formed, led by a consultant spinal surgeon, to define the dataset and to create a tender process. Bluespier International was the successful company, and has worked with the BASS registry committee to design and launch the BSR on the Amplitude platform. | NS | A subcommittee led by a consultant Spinal Surgeon defined the dataset        | Demographics, indication, details of the presenting clinical symptoms, resulting operative data, type of spinal implants, PROMs data                                                                                                                                                                                                                                                                                                                                                                                                                                                                                                                                                                                                                                                                                                                                | NS | A web-based solution was developed, ensuring that all users could access the BSR wherever, and whenever they wished                                                                                                                                                                                                                                                                                                                                                                                                                                                                                                                                                                                                                                         | Currently there are over 200 registered surgeons, and over 3,000 patients enrolled in the registry                                                                             | NS | Use of a patient portal for direct data input is recommended | NS                                                                                                                                        | Disciplined data collection can result in improved patient care through identifying trends and early problems. Registries help the drive towards value based health care - increase quality whilst reducing costs. The societies will be for the first time able to create real-time accurate population data on spinal surgery in the UK. | NS | To address data security - the BSR has been registered with the UK Information Commissioners Office, the Healthcare Quality Improvement Partnership, and the Record of Central Returns. In addition, NHS IT experts reviewed the security policies, and data storage technology |
| 9  |                |                                                                                                                                                                                                                               |      |                                                                              |                 |                                                                                                                                                                                                                     |    |                                                                                                                                                                                                                             |    |                                                                                                                                                                                                                                                                                  |    |                                                                              |                                                                                                                                                                                                                                                                                                                                                                                                                                                                                                                                                                                                                                                                                                                                                                                                                                                                     |    |                                                                                                                                                                                                                                                                                                                                                                                                                                                                                                                                                                                                                                                                                                                                                             |                                                                                                                                                                                |    |                                                              |                                                                                                                                           |                                                                                                                                                                                                                                                                                                                                            |    |                                                                                                                                                                                                                                                                                 |
| 10 |                |                                                                                                                                                                                                                               |      |                                                                              |                 |                                                                                                                                                                                                                     |    |                                                                                                                                                                                                                             |    |                                                                                                                                                                                                                                                                                  |    |                                                                              |                                                                                                                                                                                                                                                                                                                                                                                                                                                                                                                                                                                                                                                                                                                                                                                                                                                                     |    |                                                                                                                                                                                                                                                                                                                                                                                                                                                                                                                                                                                                                                                                                                                                                             |                                                                                                                                                                                |    |                                                              |                                                                                                                                           |                                                                                                                                                                                                                                                                                                                                            |    |                                                                                                                                                                                                                                                                                 |
| 11 |                |                                                                                                                                                                                                                               |      |                                                                              |                 |                                                                                                                                                                                                                     |    |                                                                                                                                                                                                                             |    |                                                                                                                                                                                                                                                                                  |    |                                                                              |                                                                                                                                                                                                                                                                                                                                                                                                                                                                                                                                                                                                                                                                                                                                                                                                                                                                     |    |                                                                                                                                                                                                                                                                                                                                                                                                                                                                                                                                                                                                                                                                                                                                                             |                                                                                                                                                                                |    |                                                              |                                                                                                                                           |                                                                                                                                                                                                                                                                                                                                            |    |                                                                                                                                                                                                                                                                                 |
| 12 |                |                                                                                                                                                                                                                               |      |                                                                              |                 |                                                                                                                                                                                                                     |    |                                                                                                                                                                                                                             |    |                                                                                                                                                                                                                                                                                  |    |                                                                              |                                                                                                                                                                                                                                                                                                                                                                                                                                                                                                                                                                                                                                                                                                                                                                                                                                                                     |    |                                                                                                                                                                                                                                                                                                                                                                                                                                                                                                                                                                                                                                                                                                                                                             |                                                                                                                                                                                |    |                                                              |                                                                                                                                           |                                                                                                                                                                                                                                                                                                                                            |    |                                                                                                                                                                                                                                                                                 |
| 13 |                |                                                                                                                                                                                                                               |      |                                                                              |                 |                                                                                                                                                                                                                     |    |                                                                                                                                                                                                                             |    |                                                                                                                                                                                                                                                                                  |    |                                                                              |                                                                                                                                                                                                                                                                                                                                                                                                                                                                                                                                                                                                                                                                                                                                                                                                                                                                     |    |                                                                                                                                                                                                                                                                                                                                                                                                                                                                                                                                                                                                                                                                                                                                                             |                                                                                                                                                                                |    |                                                              |                                                                                                                                           |                                                                                                                                                                                                                                                                                                                                            |    |                                                                                                                                                                                                                                                                                 |
| 14 |                |                                                                                                                                                                                                                               |      |                                                                              |                 |                                                                                                                                                                                                                     |    |                                                                                                                                                                                                                             |    |                                                                                                                                                                                                                                                                                  |    |                                                                              |                                                                                                                                                                                                                                                                                                                                                                                                                                                                                                                                                                                                                                                                                                                                                                                                                                                                     |    |                                                                                                                                                                                                                                                                                                                                                                                                                                                                                                                                                                                                                                                                                                                                                             |                                                                                                                                                                                |    |                                                              |                                                                                                                                           |                                                                                                                                                                                                                                                                                                                                            |    |                                                                                                                                                                                                                                                                                 |
| 15 |                |                                                                                                                                                                                                                               |      |                                                                              |                 |                                                                                                                                                                                                                     |    |                                                                                                                                                                                                                             |    |                                                                                                                                                                                                                                                                                  |    |                                                                              |                                                                                                                                                                                                                                                                                                                                                                                                                                                                                                                                                                                                                                                                                                                                                                                                                                                                     |    |                                                                                                                                                                                                                                                                                                                                                                                                                                                                                                                                                                                                                                                                                                                                                             |                                                                                                                                                                                |    |                                                              |                                                                                                                                           |                                                                                                                                                                                                                                                                                                                                            |    |                                                                                                                                                                                                                                                                                 |
| 16 |                |                                                                                                                                                                                                                               |      |                                                                              |                 |                                                                                                                                                                                                                     |    |                                                                                                                                                                                                                             |    |                                                                                                                                                                                                                                                                                  |    |                                                                              |                                                                                                                                                                                                                                                                                                                                                                                                                                                                                                                                                                                                                                                                                                                                                                                                                                                                     |    |                                                                                                                                                                                                                                                                                                                                                                                                                                                                                                                                                                                                                                                                                                                                                             |                                                                                                                                                                                |    |                                                              |                                                                                                                                           |                                                                                                                                                                                                                                                                                                                                            |    |                                                                                                                                                                                                                                                                                 |
| 17 |                |                                                                                                                                                                                                                               |      |                                                                              |                 |                                                                                                                                                                                                                     |    |                                                                                                                                                                                                                             |    |                                                                                                                                                                                                                                                                                  |    |                                                                              |                                                                                                                                                                                                                                                                                                                                                                                                                                                                                                                                                                                                                                                                                                                                                                                                                                                                     |    |                                                                                                                                                                                                                                                                                                                                                                                                                                                                                                                                                                                                                                                                                                                                                             |                                                                                                                                                                                |    |                                                              |                                                                                                                                           |                                                                                                                                                                                                                                                                                                                                            |    |                                                                                                                                                                                                                                                                                 |
| 18 |                |                                                                                                                                                                                                                               |      |                                                                              |                 |                                                                                                                                                                                                                     |    |                                                                                                                                                                                                                             |    |                                                                                                                                                                                                                                                                                  |    |                                                                              |                                                                                                                                                                                                                                                                                                                                                                                                                                                                                                                                                                                                                                                                                                                                                                                                                                                                     |    |                                                                                                                                                                                                                                                                                                                                                                                                                                                                                                                                                                                                                                                                                                                                                             |                                                                                                                                                                                |    |                                                              |                                                                                                                                           |                                                                                                                                                                                                                                                                                                                                            |    |                                                                                                                                                                                                                                                                                 |
| 19 |                |                                                                                                                                                                                                                               |      |                                                                              |                 |                                                                                                                                                                                                                     |    |                                                                                                                                                                                                                             |    |                                                                                                                                                                                                                                                                                  |    |                                                                              |                                                                                                                                                                                                                                                                                                                                                                                                                                                                                                                                                                                                                                                                                                                                                                                                                                                                     |    |                                                                                                                                                                                                                                                                                                                                                                                                                                                                                                                                                                                                                                                                                                                                                             |                                                                                                                                                                                |    |                                                              |                                                                                                                                           |                                                                                                                                                                                                                                                                                                                                            |    |                                                                                                                                                                                                                                                                                 |
| 20 | Hickey G.L.    | A technical review of the United Kingdom National Adult Cardiac Surgery Governance Analysis 2008-11                                                                                                                           | 2014 | United Kingdom National Adult Cardiac Surgery Governance Analysis 2008-11    | Cardiac surgery | Society for Cardiothoracic Surgery in Great Britain and Ireland who contribute data to the SCTS database. National Institute for Cardiovascular Outcomes Research, UCL London. National Adult Cardiac Surgery Audit | NS | To give a technical review of the registry                                                                                                                                                                                  | NS | HQUIP                                                                                                                                                                                                                                                                            | NS | Each record contains a hospital identifier code and a consultant GMC number. | Data entered locally by surgeons are validated by database managers prior to upload via a web-portal to NICOR. At this stage, further validation is performed according to logical rules. The data are then forwarded to an academic healthcare informatics department for data cleaning. Cleaning involves removing duplicate records, recoding transcriptional discrepancies and resolving clinical and temporal conflicts. The data cleaning is performed by the analyst responsible for the governance analysis in collaboration with surgeons and the audit manager. All cleaning is made reproducible by programming a series of scripts, which are updated following each new data extract. At this stage, and prior to analysis, data for the last 3 years are returned to each contributing hospital for local update then records in the central registry | NS | Most missing data are resolved during the validation stages of the data transfer. SCTS has a policy for the handling of missing data. First, missing and conflicting data for in-hospital mortality status are backfilled and validated via record linkage to the Office for National Statistics (ONS) census database, which records details of all deaths in England and Wales. After all reasonable attempts to backfill these data, any remaining missing discharge status data are mapped to in-hospital death. For the final analysis dataset after backfilling discharge status data, in Scotland there were 0 (0.00% of Scottish records) missing discharge statuses; in Wales and Northern Ireland, there were 3 discharge statuses each (0.06 and | Data is reported on both the base hospital and the responsible consultant surgeon. Risk-adjusted in-hospital mortality, length of stay, postoperative complications, morbidity | NS | NS                                                           | Improve overall service quality, and enable pts to make a choice between providers. Increase public trust, identify underperforming units | NS                                                                                                                                                                                                                                                                                                                                         | NS |                                                                                                                                                                                                                                                                                 |
| 21 | Cosgriff R.    |                                                                                                                                                                                                                               |      |                                                                              |                 |                                                                                                                                                                                                                     |    |                                                                                                                                                                                                                             |    |                                                                                                                                                                                                                                                                                  |    |                                                                              |                                                                                                                                                                                                                                                                                                                                                                                                                                                                                                                                                                                                                                                                                                                                                                                                                                                                     |    |                                                                                                                                                                                                                                                                                                                                                                                                                                                                                                                                                                                                                                                                                                                                                             |                                                                                                                                                                                |    |                                                              |                                                                                                                                           |                                                                                                                                                                                                                                                                                                                                            |    |                                                                                                                                                                                                                                                                                 |
| 22 | Grant S.W.     |                                                                                                                                                                                                                               |      |                                                                              |                 |                                                                                                                                                                                                                     |    |                                                                                                                                                                                                                             |    |                                                                                                                                                                                                                                                                                  |    |                                                                              |                                                                                                                                                                                                                                                                                                                                                                                                                                                                                                                                                                                                                                                                                                                                                                                                                                                                     |    |                                                                                                                                                                                                                                                                                                                                                                                                                                                                                                                                                                                                                                                                                                                                                             |                                                                                                                                                                                |    |                                                              |                                                                                                                                           |                                                                                                                                                                                                                                                                                                                                            |    |                                                                                                                                                                                                                                                                                 |
| 23 | Cooper G.      |                                                                                                                                                                                                                               |      |                                                                              |                 |                                                                                                                                                                                                                     |    |                                                                                                                                                                                                                             |    |                                                                                                                                                                                                                                                                                  |    |                                                                              |                                                                                                                                                                                                                                                                                                                                                                                                                                                                                                                                                                                                                                                                                                                                                                                                                                                                     |    |                                                                                                                                                                                                                                                                                                                                                                                                                                                                                                                                                                                                                                                                                                                                                             |                                                                                                                                                                                |    |                                                              |                                                                                                                                           |                                                                                                                                                                                                                                                                                                                                            |    |                                                                                                                                                                                                                                                                                 |
| 24 | Deanfield J.   |                                                                                                                                                                                                                               |      |                                                                              |                 |                                                                                                                                                                                                                     |    |                                                                                                                                                                                                                             |    |                                                                                                                                                                                                                                                                                  |    |                                                                              |                                                                                                                                                                                                                                                                                                                                                                                                                                                                                                                                                                                                                                                                                                                                                                                                                                                                     |    |                                                                                                                                                                                                                                                                                                                                                                                                                                                                                                                                                                                                                                                                                                                                                             |                                                                                                                                                                                |    |                                                              |                                                                                                                                           |                                                                                                                                                                                                                                                                                                                                            |    |                                                                                                                                                                                                                                                                                 |
| 25 | Roxburgh J.    |                                                                                                                                                                                                                               |      |                                                                              |                 |                                                                                                                                                                                                                     |    |                                                                                                                                                                                                                             |    |                                                                                                                                                                                                                                                                                  |    |                                                                              |                                                                                                                                                                                                                                                                                                                                                                                                                                                                                                                                                                                                                                                                                                                                                                                                                                                                     |    |                                                                                                                                                                                                                                                                                                                                                                                                                                                                                                                                                                                                                                                                                                                                                             |                                                                                                                                                                                |    |                                                              |                                                                                                                                           |                                                                                                                                                                                                                                                                                                                                            |    |                                                                                                                                                                                                                                                                                 |
| 26 | Bridgewater B. |                                                                                                                                                                                                                               |      |                                                                              |                 |                                                                                                                                                                                                                     |    |                                                                                                                                                                                                                             |    |                                                                                                                                                                                                                                                                                  |    |                                                                              |                                                                                                                                                                                                                                                                                                                                                                                                                                                                                                                                                                                                                                                                                                                                                                                                                                                                     |    |                                                                                                                                                                                                                                                                                                                                                                                                                                                                                                                                                                                                                                                                                                                                                             |                                                                                                                                                                                |    |                                                              |                                                                                                                                           |                                                                                                                                                                                                                                                                                                                                            |    |                                                                                                                                                                                                                                                                                 |
| 27 |                |                                                                                                                                                                                                                               |      |                                                                              |                 |                                                                                                                                                                                                                     |    |                                                                                                                                                                                                                             |    |                                                                                                                                                                                                                                                                                  |    |                                                                              |                                                                                                                                                                                                                                                                                                                                                                                                                                                                                                                                                                                                                                                                                                                                                                                                                                                                     |    |                                                                                                                                                                                                                                                                                                                                                                                                                                                                                                                                                                                                                                                                                                                                                             |                                                                                                                                                                                |    |                                                              |                                                                                                                                           |                                                                                                                                                                                                                                                                                                                                            |    |                                                                                                                                                                                                                                                                                 |
| 28 |                |                                                                                                                                                                                                                               |      |                                                                              |                 |                                                                                                                                                                                                                     |    |                                                                                                                                                                                                                             |    |                                                                                                                                                                                                                                                                                  |    |                                                                              |                                                                                                                                                                                                                                                                                                                                                                                                                                                                                                                                                                                                                                                                                                                                                                                                                                                                     |    |                                                                                                                                                                                                                                                                                                                                                                                                                                                                                                                                                                                                                                                                                                                                                             |                                                                                                                                                                                |    |                                                              |                                                                                                                                           |                                                                                                                                                                                                                                                                                                                                            |    |                                                                                                                                                                                                                                                                                 |
| 29 |                |                                                                                                                                                                                                                               |      |                                                                              |                 |                                                                                                                                                                                                                     |    |                                                                                                                                                                                                                             |    |                                                                                                                                                                                                                                                                                  |    |                                                                              |                                                                                                                                                                                                                                                                                                                                                                                                                                                                                                                                                                                                                                                                                                                                                                                                                                                                     |    |                                                                                                                                                                                                                                                                                                                                                                                                                                                                                                                                                                                                                                                                                                                                                             |                                                                                                                                                                                |    |                                                              |                                                                                                                                           |                                                                                                                                                                                                                                                                                                                                            |    |                                                                                                                                                                                                                                                                                 |
| 30 |                |                                                                                                                                                                                                                               |      |                                                                              |                 |                                                                                                                                                                                                                     |    |                                                                                                                                                                                                                             |    |                                                                                                                                                                                                                                                                                  |    |                                                                              |                                                                                                                                                                                                                                                                                                                                                                                                                                                                                                                                                                                                                                                                                                                                                                                                                                                                     |    |                                                                                                                                                                                                                                                                                                                                                                                                                                                                                                                                                                                                                                                                                                                                                             |                                                                                                                                                                                |    |                                                              |                                                                                                                                           |                                                                                                                                                                                                                                                                                                                                            |    |                                                                                                                                                                                                                                                                                 |
| 31 |                |                                                                                                                                                                                                                               |      |                                                                              |                 |                                                                                                                                                                                                                     |    |                                                                                                                                                                                                                             |    |                                                                                                                                                                                                                                                                                  |    |                                                                              |                                                                                                                                                                                                                                                                                                                                                                                                                                                                                                                                                                                                                                                                                                                                                                                                                                                                     |    |                                                                                                                                                                                                                                                                                                                                                                                                                                                                                                                                                                                                                                                                                                                                                             |                                                                                                                                                                                |    |                                                              |                                                                                                                                           |                                                                                                                                                                                                                                                                                                                                            |    |                                                                                                                                                                                                                                                                                 |
| 32 |                |                                                                                                                                                                                                                               |      |                                                                              |                 |                                                                                                                                                                                                                     |    |                                                                                                                                                                                                                             |    |                                                                                                                                                                                                                                                                                  |    |                                                                              |                                                                                                                                                                                                                                                                                                                                                                                                                                                                                                                                                                                                                                                                                                                                                                                                                                                                     |    |                                                                                                                                                                                                                                                                                                                                                                                                                                                                                                                                                                                                                                                                                                                                                             |                                                                                                                                                                                |    |                                                              |                                                                                                                                           |                                                                                                                                                                                                                                                                                                                                            |    |                                                                                                                                                                                                                                                                                 |
| 33 |                |                                                                                                                                                                                                                               |      |                                                                              |                 |                                                                                                                                                                                                                     |    |                                                                                                                                                                                                                             |    |                                                                                                                                                                                                                                                                                  |    |                                                                              |                                                                                                                                                                                                                                                                                                                                                                                                                                                                                                                                                                                                                                                                                                                                                                                                                                                                     |    |                                                                                                                                                                                                                                                                                                                                                                                                                                                                                                                                                                                                                                                                                                                                                             |                                                                                                                                                                                |    |                                                              |                                                                                                                                           |                                                                                                                                                                                                                                                                                                                                            |    |                                                                                                                                                                                                                                                                                 |
| 34 |                |                                                                                                                                                                                                                               |      |                                                                              |                 |                                                                                                                                                                                                                     |    |                                                                                                                                                                                                                             |    |                                                                                                                                                                                                                                                                                  |    |                                                                              |                                                                                                                                                                                                                                                                                                                                                                                                                                                                                                                                                                                                                                                                                                                                                                                                                                                                     |    |                                                                                                                                                                                                                                                                                                                                                                                                                                                                                                                                                                                                                                                                                                                                                             |                                                                                                                                                                                |    |                                                              |                                                                                                                                           |                                                                                                                                                                                                                                                                                                                                            |    |                                                                                                                                                                                                                                                                                 |
| 35 |                |                                                                                                                                                                                                                               |      |                                                                              |                 |                                                                                                                                                                                                                     |    |                                                                                                                                                                                                                             |    |                                                                                                                                                                                                                                                                                  |    |                                                                              |                                                                                                                                                                                                                                                                                                                                                                                                                                                                                                                                                                                                                                                                                                                                                                                                                                                                     |    |                                                                                                                                                                                                                                                                                                                                                                                                                                                                                                                                                                                                                                                                                                                                                             |                                                                                                                                                                                |    |                                                              |                                                                                                                                           |                                                                                                                                                                                                                                                                                                                                            |    |                                                                                                                                                                                                                                                                                 |
| 36 |                |                                                                                                                                                                                                                               |      |                                                                              |                 |                                                                                                                                                                                                                     |    |                                                                                                                                                                                                                             |    |                                                                                                                                                                                                                                                                                  |    |                                                                              |                                                                                                                                                                                                                                                                                                                                                                                                                                                                                                                                                                                                                                                                                                                                                                                                                                                                     |    |                                                                                                                                                                                                                                                                                                                                                                                                                                                                                                                                                                                                                                                                                                                                                             |                                                                                                                                                                                |    |                                                              |                                                                                                                                           |                                                                                                                                                                                                                                                                                                                                            |    |                                                                                                                                                                                                                                                                                 |
| 37 |                |                                                                                                                                                                                                                               |      |                                                                              |                 |                                                                                                                                                                                                                     |    |                                                                                                                                                                                                                             |    |                                                                                                                                                                                                                                                                                  |    |                                                                              |                                                                                                                                                                                                                                                                                                                                                                                                                                                                                                                                                                                                                                                                                                                                                                                                                                                                     |    |                                                                                                                                                                                                                                                                                                                                                                                                                                                                                                                                                                                                                                                                                                                                                             |                                                                                                                                                                                |    |                                                              |                                                                                                                                           |                                                                                                                                                                                                                                                                                                                                            |    |                                                                                                                                                                                                                                                                                 |
| 38 |                |                                                                                                                                                                                                                               |      |                                                                              |                 |                                                                                                                                                                                                                     |    |                                                                                                                                                                                                                             |    |                                                                                                                                                                                                                                                                                  |    |                                                                              |                                                                                                                                                                                                                                                                                                                                                                                                                                                                                                                                                                                                                                                                                                                                                                                                                                                                     |    |                                                                                                                                                                                                                                                                                                                                                                                                                                                                                                                                                                                                                                                                                                                                                             |                                                                                                                                                                                |    |                                                              |                                                                                                                                           |                                                                                                                                                                                                                                                                                                                                            |    |                                                                                                                                                                                                                                                                                 |
| 39 |                |                                                                                                                                                                                                                               |      |                                                                              |                 |                                                                                                                                                                                                                     |    |                                                                                                                                                                                                                             |    |                                                                                                                                                                                                                                                                                  |    |                                                                              |                                                                                                                                                                                                                                                                                                                                                                                                                                                                                                                                                                                                                                                                                                                                                                                                                                                                     |    |                                                                                                                                                                                                                                                                                                                                                                                                                                                                                                                                                                                                                                                                                                                                                             |                                                                                                                                                                                |    |                                                              |                                                                                                                                           |                                                                                                                                                                                                                                                                                                                                            |    |                                                                                                                                                                                                                                                                                 |
| 40 |                |                                                                                                                                                                                                                               |      |                                                                              |                 |                                                                                                                                                                                                                     |    |                                                                                                                                                                                                                             |    |                                                                                                                                                                                                                                                                                  |    |                                                                              |                                                                                                                                                                                                                                                                                                                                                                                                                                                                                                                                                                                                                                                                                                                                                                                                                                                                     |    |                                                                                                                                                                                                                                                                                                                                                                                                                                                                                                                                                                                                                                                                                                                                                             |                                                                                                                                                                                |    |                                                              |                                                                                                                                           |                                                                                                                                                                                                                                                                                                                                            |    |                                                                                                                                                                                                                                                                                 |
| 41 |                |                                                                                                                                                                                                                               |      |                                                                              |                 |                                                                                                                                                                                                                     |    |                                                                                                                                                                                                                             |    |                                                                                                                                                                                                                                                                                  |    |                                                                              |                                                                                                                                                                                                                                                                                                                                                                                                                                                                                                                                                                                                                                                                                                                                                                                                                                                                     |    |                                                                                                                                                                                                                                                                                                                                                                                                                                                                                                                                                                                                                                                                                                                                                             |                                                                                                                                                                                |    |                                                              |                                                                                                                                           |                                                                                                                                                                                                                                                                                                                                            |    |                                                                                                                                                                                                                                                                                 |
| 42 |                |                                                                                                                                                                                                                               |      |                                                                              |                 |                                                                                                                                                                                                                     |    |                                                                                                                                                                                                                             |    |                                                                                                                                                                                                                                                                                  |    |                                                                              |                                                                                                                                                                                                                                                                                                                                                                                                                                                                                                                                                                                                                                                                                                                                                                                                                                                                     |    |                                                                                                                                                                                                                                                                                                                                                                                                                                                                                                                                                                                                                                                                                                                                                             |                                                                                                                                                                                |    |                                                              |                                                                                                                                           |                                                                                                                                                                                                                                                                                                                                            |    |                                                                                                                                                                                                                                                                                 |
| 43 |                |                                                                                                                                                                                                                               |      |                                                                              |                 |                                                                                                                                                                                                                     |    |                                                                                                                                                                                                                             |    |                                                                                                                                                                                                                                                                                  |    |                                                                              |                                                                                                                                                                                                                                                                                                                                                                                                                                                                                                                                                                                                                                                                                                                                                                                                                                                                     |    |                                                                                                                                                                                                                                                                                                                                                                                                                                                                                                                                                                                                                                                                                                                                                             |                                                                                                                                                                                |    |                                                              |                                                                                                                                           |                                                                                                                                                                                                                                                                                                                                            |    |                                                                                                                                                                                                                                                                                 |
| 44 |                |                                                                                                                                                                                                                               |      |                                                                              |                 |                                                                                                                                                                                                                     |    |                                                                                                                                                                                                                             |    |                                                                                                                                                                                                                                                                                  |    |                                                                              |                                                                                                                                                                                                                                                                                                                                                                                                                                                                                                                                                                                                                                                                                                                                                                                                                                                                     |    |                                                                                                                                                                                                                                                                                                                                                                                                                                                                                                                                                                                                                                                                                                                                                             |                                                                                                                                                                                |    |                                                              |                                                                                                                                           |                                                                                                                                                                                                                                                                                                                                            |    |                                                                                                                                                                                                                                                                                 |
| 45 |                |                                                                                                                                                                                                                               |      |                                                                              |                 |                                                                                                                                                                                                                     |    |                                                                                                                                                                                                                             |    |                                                                                                                                                                                                                                                                                  |    |                                                                              |                                                                                                                                                                                                                                                                                                                                                                                                                                                                                                                                                                                                                                                                                                                                                                                                                                                                     |    |                                                                                                                                                                                                                                                                                                                                                                                                                                                                                                                                                                                                                                                                                                                                                             |                                                                                                                                                                                |    |                                                              |                                                                                                                                           |                                                                                                                                                                                                                                                                                                                                            |    |                                                                                                                                                                                                                                                                                 |
| 46 |                |                                                                                                                                                                                                                               |      |                                                                              |                 |                                                                                                                                                                                                                     |    |                                                                                                                                                                                                                             |    |                                                                                                                                                                                                                                                                                  |    |                                                                              |                                                                                                                                                                                                                                                                                                                                                                                                                                                                                                                                                                                                                                                                                                                                                                                                                                                                     |    |                                                                                                                                                                                                                                                                                                                                                                                                                                                                                                                                                                                                                                                                                                                                                             |                                                                                                                                                                                |    |                                                              |                                                                                                                                           |                                                                                                                                                                                                                                                                                                                                            |    |                                                                                                                                                                                                                                                                                 |
| 47 |                |                                                                                                                                                                                                                               |      |                                                                              |                 |                                                                                                                                                                                                                     |    |                                                                                                                                                                                                                             |    |                                                                                                                                                                                                                                                                                  |    |                                                                              |                                                                                                                                                                                                                                                                                                                                                                                                                                                                                                                                                                                                                                                                                                                                                                                                                                                                     |    |                                                                                                                                                                                                                                                                                                                                                                                                                                                                                                                                                                                                                                                                                                                                                             |                                                                                                                                                                                |    |                                                              |                                                                                                                                           |                                                                                                                                                                                                                                                                                                                                            |    |                                                                                                                                                                                                                                                                                 |



1  
2  
3  
4  
5  
6  
7  
8  
9  
10  
11  
12  
13  
14  
15  
16  
17  
18  
19  
20  
21  
22  
23  
24  
25  
26  
27  
28  
29  
30  
31  
32  
33  
34  
35  
36  
37  
38  
39  
40  
41  
42  
43  
44  
45  
46  
47

|                                           |                                                                                                              |      |                          |                          |                                            |    |                                                                                                                                                                                                                |    |                                                                                                                                                                                                                    |                                                                                                                                                                                                                                                                                                                                                                                                                                                                                                                                                                                                                                                                                                                                                                                                             |                                                                                                                                                                                                                                                                                                                                                                                                                                                               |    |                                                                                                                                                                                                                                                                                                                                                                                                                    |                                                                               |    |                                                                                                                                                                                                                                                                                                                                                                                                                                                                                                                                        |                                                                                                                                                                                                                                                                                                                                                                                                               |                                                                                                                                                                                                                                                                                       |                                                                                                                                                                       |    |
|-------------------------------------------|--------------------------------------------------------------------------------------------------------------|------|--------------------------|--------------------------|--------------------------------------------|----|----------------------------------------------------------------------------------------------------------------------------------------------------------------------------------------------------------------|----|--------------------------------------------------------------------------------------------------------------------------------------------------------------------------------------------------------------------|-------------------------------------------------------------------------------------------------------------------------------------------------------------------------------------------------------------------------------------------------------------------------------------------------------------------------------------------------------------------------------------------------------------------------------------------------------------------------------------------------------------------------------------------------------------------------------------------------------------------------------------------------------------------------------------------------------------------------------------------------------------------------------------------------------------|---------------------------------------------------------------------------------------------------------------------------------------------------------------------------------------------------------------------------------------------------------------------------------------------------------------------------------------------------------------------------------------------------------------------------------------------------------------|----|--------------------------------------------------------------------------------------------------------------------------------------------------------------------------------------------------------------------------------------------------------------------------------------------------------------------------------------------------------------------------------------------------------------------|-------------------------------------------------------------------------------|----|----------------------------------------------------------------------------------------------------------------------------------------------------------------------------------------------------------------------------------------------------------------------------------------------------------------------------------------------------------------------------------------------------------------------------------------------------------------------------------------------------------------------------------------|---------------------------------------------------------------------------------------------------------------------------------------------------------------------------------------------------------------------------------------------------------------------------------------------------------------------------------------------------------------------------------------------------------------|---------------------------------------------------------------------------------------------------------------------------------------------------------------------------------------------------------------------------------------------------------------------------------------|-----------------------------------------------------------------------------------------------------------------------------------------------------------------------|----|
| Mangera A.<br>Pays B.                     | BAUS Section of Endourology national Ureterscopy audit: Setting the standards for revalidation               | 2013 | Audit of UK Ureterscopy  | Ureterscopy              | British Association of Urological Surgeons | NS | Aim is for this audit to develop into a registry                                                                                                                                                               | NS | Nil funding                                                                                                                                                                                                        | A consensus proforma was produced by the BAUS Section of Endourology to capture all necessary data. The proforma was created using the percutaneous nephrolithotomy registry as a basis. It was initially approved and piloted by the BAUS Section of Endourology Data and Audit committee. Thereafter it was approved by the BAUS Audit committee.                                                                                                                                                                                                                                                                                                                                                                                                                                                         | Patient demographics, procedure side, elective/emergency, grade of surgeon, number and site of stone(s), size of stone, pre-op investigations, whether stent was used pre-operatively, use of prophylactic antibiotics, supervised training operation, procedure (rigid/flexible ureteroscope), difficult access, accessory procedures, percentage of procedures abandoned, total stone clearance rate, complications, length of stay, post operative imaging | NS | A national prospective audit link was sent to all consultant members of the BAUS Section of Endourology. Members were encouraged to complete the standardised proforma for all URS undertaken during a two week period (23 April 2012-6 May 2012). To develop this audit into a registry. Compulsory Surgeon participation, which may occur with revalidation, may provide the only means of accurate data capture | 143 procedures were recorded. 26% of cases performed in England were recorded | NS | NS                                                                                                                                                                                                                                                                                                                                                                                                                                                                                                                                     | Follow-up period was short, and long-term complications will be missed. There was no precise definition for day-case surgery. Surgeons are already under increased pressure to record and document all surgical activity and a registry will inevitably increase this burden. Time constraints may compromise accurate and timely data recording and lead to apathy in some surgeons, limiting participation. | NS                                                                                                                                                                                                                                                                                    | NS                                                                                                                                                                    | NS |
| Franklin P.D.<br>Harrold L.<br>Ayers D.C. | Incorporating patient-reported outcomes in total joint arthroplasty registries: Challenges and opportunities | 2013 | Total Joint Arthroplasty | Total Joint Arthroplasty | NS                                         | NS | This paper reviews the use of Patient reported outcomes (PROs) by worldwide TJA registries, the challenges of integrating PRO's in national implant registries and lessons from registries that have used PROs | NS | Whether government-funded or supported by specialist bodies, manufacturers , or research agencies, the costs of registry data collection must be justified by the value of the knowledge gained from the analyses. | Omitting patient-reported outcomes precludes surgeons from fully understanding the factors that contribute to pain relief, restoration of function, and patient satisfaction. PROs are increasingly used in the allocation of healthcare resources and comparative effectiveness research. PRO data must be valuable to multiple stakeholders to justify the incremental costs of their collection. Important to choose suitable PROs and develop innovative methods to collect data. To improve long-term data completion, some registries collect PRO's directly from patients at regular intervals after TJA. It is better not to rely on collecting data when patients return to clinic rather it is better to collect data directly from patients (direct-records). There was a lack of consensus over | Implant longevity, revision rates, patient demographics, BMI, co-morbidities, PROs related to pain relief and functional gains                                                                                                                                                                                                                                                                                                                                | NS | Registry procedures should be simple to increase participation. Returning registry data to the surgeon encourages ongoing commitment to complete data collection                                                                                                                                                                                                                                                   | NS                                                                            | NS | Direct entering of PRO data by patients via web-based software and mobile phones will help improve follow-up data. To increase patient participation in their own data collection, it is important to engage the patient during the consent process, have a registry coordinator to follow up the patient to encourage participation, make it easy for patients to enter PRO data electronically, and have multiple languages available. Beneficial to consent patients to be enrolled in PRO capture at the time surgery is scheduled | This review found that most data is collected at the time the patient undergoes the procedure, but postoperative follow up data is often lacking - due to different clinician/hospital.                                                                                                                                                                                                                       | Enable monitoring of postdischarge outcomes and identify patient who may be at risk for implant failure. PRO's also help guide best practices and help regulate implants providing important information to manufacturers. Such data informs surgeons practice and enables self-audit | The International Society of Arthroplasty Registries defines a full member registry as one that captures more than 90% of all cases and clinically validates the data | NS |

choose - genetic measures or condition specific, pre and post op PROs or only pre/post. It can be time consuming to enter PRO data and can be difficult to engage patients to enter their own PRO data.

|             |                                                                                                                     |      |                                                 |              |    |                                                                                                               |                                                                                                                                                                                                                                                                                                      |                                                                                                                                                                                                                                                                                                                                                                                                                                                                                                                                                                                                                                                                  |                                                                                                                                                     |    |                                                                                                                                                                                                                                                                                                                                                                                                                                             |                                                                                                                                                                       |                                                                                                                                                                                                                                                                                                                                                                                                                                                                                                                                                                                                                                                                      |    |    |    |    |                                                                                                                                                                                                                                                                                                                                                                                                                                                                                              |    |                                                                                                                                                                                                                                                                                                                                                                                                                                                                                                                                                                                                                                                                                                                                                                                                                                                                                                                                                                                                                                                                                                                                                                                                     |
|-------------|---------------------------------------------------------------------------------------------------------------------|------|-------------------------------------------------|--------------|----|---------------------------------------------------------------------------------------------------------------|------------------------------------------------------------------------------------------------------------------------------------------------------------------------------------------------------------------------------------------------------------------------------------------------------|------------------------------------------------------------------------------------------------------------------------------------------------------------------------------------------------------------------------------------------------------------------------------------------------------------------------------------------------------------------------------------------------------------------------------------------------------------------------------------------------------------------------------------------------------------------------------------------------------------------------------------------------------------------|-----------------------------------------------------------------------------------------------------------------------------------------------------|----|---------------------------------------------------------------------------------------------------------------------------------------------------------------------------------------------------------------------------------------------------------------------------------------------------------------------------------------------------------------------------------------------------------------------------------------------|-----------------------------------------------------------------------------------------------------------------------------------------------------------------------|----------------------------------------------------------------------------------------------------------------------------------------------------------------------------------------------------------------------------------------------------------------------------------------------------------------------------------------------------------------------------------------------------------------------------------------------------------------------------------------------------------------------------------------------------------------------------------------------------------------------------------------------------------------------|----|----|----|----|----------------------------------------------------------------------------------------------------------------------------------------------------------------------------------------------------------------------------------------------------------------------------------------------------------------------------------------------------------------------------------------------------------------------------------------------------------------------------------------------|----|-----------------------------------------------------------------------------------------------------------------------------------------------------------------------------------------------------------------------------------------------------------------------------------------------------------------------------------------------------------------------------------------------------------------------------------------------------------------------------------------------------------------------------------------------------------------------------------------------------------------------------------------------------------------------------------------------------------------------------------------------------------------------------------------------------------------------------------------------------------------------------------------------------------------------------------------------------------------------------------------------------------------------------------------------------------------------------------------------------------------------------------------------------------------------------------------------------|
| Bulusu V.R. | Rationale and design of a UK database for a rare cancer type: The GEM Registry for gastrointestinal stromal tumours | 2013 | GIST Epidemiology and Management (GEM) Registry | GIST tumours | NS | The registry is regulated by the UK GEM Registry Steering Committee, comprised of recognised experts in GIST. | Aim of paper: To describe the rationale and study design of the GIST Epidemiology and Management (GEM) Registry. Aim of registry: to further characterise patients with GISTs and to provide comprehensive data to improve understanding of the incidence, treatment and outcomes of GISTs in the UK | Web-based system. The GEM database has been designed around a Microsoft Access (MSACCESS) core using a SQL interface from specifically designed Active Server (asp) web pages. There are two main data input pages, for clinical and pathological (extended) data, together with facilities for reviewing historical records for each patient and generating real-time reports on the current database content. Piloting the registry was useful. It allowed GIST clinicians using the registry to test the software and identify any areas for improvement - suggested modifications were agreed by the Steering Committee before implementation on the website | Development of the UK GEM Registry and ongoing training was supported by an unrestricted educational grant from Novartis Pharmaceuticals UK limited | NS | Demographics, date of diagnosis, tumour characteristics, referral source, mode of presentation, biopsy details and date of procedure, rupture (yes/no), risk assessment, tumour type, details of resection, adjuvant treatment, details of metastases, relapse date, participation in clinical trial (yes/no), date and case of death, consent received, loss to follow up recorded. For centres willing an extended data set was available | Periodic on-site quality assurance checks are maintained, together with continuous statistical comparisons of local data between centres to warrant data consistency. | The interface pages provide real-time assistance with data input, by providing reminders for mandatory fields, acceptable ranges for numeric fields, calendar support for dates and drop-down boxes for most text input. Data clerks, nurses and clinicians at each participating centre attended training sessions to ensure data accuracy. Every unit had training on the use of the registry tool. A user guide was available and e-mail and telephone support was provided. Ongoing training and support for newly recruited centres, drop-down boxes, calendars and numeric limits in the web-based software interface can reduce the likelihood of human error | NS | NS | NS | NS | The registry data will provide important insights into the incidence, prevalence, recurrence, survival and mortality rates of GISTs, as well as treatment practices throughout the UK, thereby enabling therapeutic intervention to be evaluated and ultimately optimised. It will also help review prognosis and assess long term treatment benefits and improve quality of care delivery. This information will help inform clinical practice and guide the development of clinical trials | NS | The Registry will be implemented and reported in accordance with applicable local regulations and with the ethical principles laid down in the Declaration of Helsinki. Ethical approval was granted centrally for the registry via the National Research Ethic Service. Eligible patients will only be included in the study after providing written, informed consent. All data will be anonymous. Data stored on either local hospital server or at server maintained by commercial host. Periodically, locally stored information is uploaded to the central UK GIST Registry (National Data set) held on the host server. User access to the system is password protected and has multiple levels of privilege for data editing, record deletion, transmission to the central server & creation of new user accounts. Clinicians are able to access the system from anywhere by logging in via the hospital intranet. The Steering Committee reviews the requests for access to the registry. Each request is carefully reviewed on a case by case basis and appropriate access granted for ethically approved research projects. Access to the system is limited to individuals having access |
|-------------|---------------------------------------------------------------------------------------------------------------------|------|-------------------------------------------------|--------------|----|---------------------------------------------------------------------------------------------------------------|------------------------------------------------------------------------------------------------------------------------------------------------------------------------------------------------------------------------------------------------------------------------------------------------------|------------------------------------------------------------------------------------------------------------------------------------------------------------------------------------------------------------------------------------------------------------------------------------------------------------------------------------------------------------------------------------------------------------------------------------------------------------------------------------------------------------------------------------------------------------------------------------------------------------------------------------------------------------------|-----------------------------------------------------------------------------------------------------------------------------------------------------|----|---------------------------------------------------------------------------------------------------------------------------------------------------------------------------------------------------------------------------------------------------------------------------------------------------------------------------------------------------------------------------------------------------------------------------------------------|-----------------------------------------------------------------------------------------------------------------------------------------------------------------------|----------------------------------------------------------------------------------------------------------------------------------------------------------------------------------------------------------------------------------------------------------------------------------------------------------------------------------------------------------------------------------------------------------------------------------------------------------------------------------------------------------------------------------------------------------------------------------------------------------------------------------------------------------------------|----|----|----|----|----------------------------------------------------------------------------------------------------------------------------------------------------------------------------------------------------------------------------------------------------------------------------------------------------------------------------------------------------------------------------------------------------------------------------------------------------------------------------------------------|----|-----------------------------------------------------------------------------------------------------------------------------------------------------------------------------------------------------------------------------------------------------------------------------------------------------------------------------------------------------------------------------------------------------------------------------------------------------------------------------------------------------------------------------------------------------------------------------------------------------------------------------------------------------------------------------------------------------------------------------------------------------------------------------------------------------------------------------------------------------------------------------------------------------------------------------------------------------------------------------------------------------------------------------------------------------------------------------------------------------------------------------------------------------------------------------------------------------|

1  
2  
3  
4  
5  
6  
7  
8  
9  
10  
11  
12  
13  
14  
15  
16  
17  
18  
19  
20  
21  
22  
23  
24  
25  
26  
27  
28  
29  
30  
31  
32  
33  
34  
35  
36  
37  
38  
39  
40  
41  
42  
43  
44  
45  
46  
47



checked at an aggregate level against data available from the HESonline website. Our findings demonstrate that for procedures with simple specific codes (i.e. not requiring complex combinations of codes to describe the procedure), HES can accurately identify hospitals using new procedures and the numbers of those procedures undertaken. In contrast, HES data show poor specificity for procedures requiring complex combinations of OPCS coding. HES may help to identify hospitals that have not registered cases on national databases. HES data may be useful to improve the quality of national registers. For example, this has been successfully achieved in the National Bowel Cancer Audit Project by the Association of Coloproctology of Great Britain and Ireland, which used HES to check the coverage of the Audit, and the UK National Joint Register which demonstrated important variations in hip and knee replacement revision rates through linkage of its data to HES

For peer review only

1  
2  
3  
4  
5  
6  
7  
8  
9  
10  
11  
12  
13  
14  
15  
16  
17  
18  
19  
20  
21  
22  
23  
24  
25  
26  
27  
28  
29  
30  
31  
32  
33  
34  
35  
36  
37  
38  
39  
40  
41  
42  
43  
44  
45  
46  
47

1  
2  
3  
4  
5  
6  
7  
8  
9  
10  
11  
12  
13  
14  
15  
16  
17  
18  
19  
20  
21  
22  
23  
24  
25  
26  
27  
28  
29  
30  
31  
32  
33  
34  
35  
36  
37  
38  
39  
40  
41  
42  
43  
44  
45  
46  
47

|          |                                                               |      |                                        |                                                                           |                                                                                                                                                           |                                                                                                                                                               |                                                                                                         |                                                                                                                                                                                                                                                                                                                                      |                                                              |          |                                                                                                                                                                                                                                                                                                                                                                                                 |    |                                                                                                                                                                                                                                                                                                                                                                                                                                                                                                                                                                                                                                                                                                                                                                                                                                                                                                                                                                                                                                                                                                                                                                                                                                                                                                                                                                                                                                                                                                                                                                                                                                                                                                                           |                                                                                                                                                                                                                                                                                                                                                                                                                                                                                                                                                                                                                                                                                    |                                                                                                                                                            |                                                                                                                                                                                                                                                                                                                   |                                                         |                                                                                                                                                                                                      |    |                                                                                                                                                                                                                                                                                                                           |
|----------|---------------------------------------------------------------|------|----------------------------------------|---------------------------------------------------------------------------|-----------------------------------------------------------------------------------------------------------------------------------------------------------|---------------------------------------------------------------------------------------------------------------------------------------------------------------|---------------------------------------------------------------------------------------------------------|--------------------------------------------------------------------------------------------------------------------------------------------------------------------------------------------------------------------------------------------------------------------------------------------------------------------------------------|--------------------------------------------------------------|----------|-------------------------------------------------------------------------------------------------------------------------------------------------------------------------------------------------------------------------------------------------------------------------------------------------------------------------------------------------------------------------------------------------|----|---------------------------------------------------------------------------------------------------------------------------------------------------------------------------------------------------------------------------------------------------------------------------------------------------------------------------------------------------------------------------------------------------------------------------------------------------------------------------------------------------------------------------------------------------------------------------------------------------------------------------------------------------------------------------------------------------------------------------------------------------------------------------------------------------------------------------------------------------------------------------------------------------------------------------------------------------------------------------------------------------------------------------------------------------------------------------------------------------------------------------------------------------------------------------------------------------------------------------------------------------------------------------------------------------------------------------------------------------------------------------------------------------------------------------------------------------------------------------------------------------------------------------------------------------------------------------------------------------------------------------------------------------------------------------------------------------------------------------|------------------------------------------------------------------------------------------------------------------------------------------------------------------------------------------------------------------------------------------------------------------------------------------------------------------------------------------------------------------------------------------------------------------------------------------------------------------------------------------------------------------------------------------------------------------------------------------------------------------------------------------------------------------------------------|------------------------------------------------------------------------------------------------------------------------------------------------------------|-------------------------------------------------------------------------------------------------------------------------------------------------------------------------------------------------------------------------------------------------------------------------------------------------------------------|---------------------------------------------------------|------------------------------------------------------------------------------------------------------------------------------------------------------------------------------------------------------|----|---------------------------------------------------------------------------------------------------------------------------------------------------------------------------------------------------------------------------------------------------------------------------------------------------------------------------|
| Small P. | The UK national bariatric surgery registry: The second report | 2013 | UK National Bariatric Surgery Registry | Bariatric surgery: gastric bypass, gastric banding and sleeve gastrectomy | British Obesity and Metabolic Surgery Society (BOMSS), Association of laparoscopic surgeons, Association of Upper gastrointestinal surgeons and Dendrite. | Registry management by Dendrite clinical systems. Day to day administration by BOMSS. Oversight of the database design controlled by NBSR Database committee. | To provide a nationwide analysis of outcomes from bariatric and metabolic surgery in the UK and Ireland | Bespoke registry built by Dendrite. Hosted on a secure Dendrite server within the NHSNet N3 network. This N3 network has a fast link from any NHS computer that has NHS intranet access. The server also has a network card which gives secure access from outside the NHSNet so that data can be entered from any private hospital. | No Public funding. Anticipates receiving funding from HQUIP. | BMJ Open | Demographics, mortality, how each pt was funded, length of stay, complications, BMI pre-op, ASA, functional status, operating surgeon, type of operation, operative approach, co-morbidities, functional impairment, additional procedures, mortality data at the level of the individual surgeon, weight loss post op, change in co-morbidities post op, discharge date, discharge destination | NS | Missing data is inevitable when collecting large amounts of data, but can be minimised by careful registry design and well engaged participants. It takes less than eight minutes to complete the on-line database record. Volume of missing data is a reflection of the following factors: 1) how accessible/available the information/data is to whoever enters the data 2) how important/useful the clinician believes the data to be 3) the clarity of the data definitions. To aid data collection, the system offers downloadable PDF forms for each section of the database and for each operation type - these forms can go in the patient notes and be filled in during the patient pathway - data can then be inputted into a computer when the patient is discharged. The data collected enables users to keep track of their cases, edit data, and follow up their patients. There has been an exponential growth in the number of data entry since 2006 - reflection on a) enthusiasm of bariatric surgeons b) 'continued yet slow growth' in the provision of services. Submission of data to the NBSR has recently become a condition for NHS commissioning of bariatric surgery so in the future the NBSR should contain data on all NHS funded bariatric surgery patients. This has increased number of contributing surgeons from 84 to 150 and number of contributing hospitals from 89 to 129. Whilst submission of data for privately funded patients is not yet mandatory, it is anticipated that data for most of these patients will be included. Colour coding system highlights records that are incomplete. Other tools have been developed to make it easier to input data: multi-choice tick | 77% of UK Bariatric surgeons were entering data and upto 78% of NHS patients were being recorded into the registry. The degree of completeness for comorbidity data for the NBSR has improved over time. 80% had a complete set of comorbidity data recorded, and just over 10% had only 1 field missing. In the NBSR, it appeared that the comorbidity data entry points that were perceived to be more important were filled in more often than those perceived to be not as useful eg HTN had a high completeness rate, depression and liver disease had a lower completeness rate. 18283 surgical procedures recorded in the database (procedures performed between 2011-2013) | Annual reports. To conform with DOH, surgeons agreed for submitting and reporting of their own mortality data in the interest of openness and transparency | Weight loss surgery Information and Support (WLSinfo) - is a patient led charity. They were invited to contribute the introduction of the report. The charity was very happy to be involved and we reassured by the outcomes RE mortality, morbidity and LOS. They were also reassured about their chosen surgeon | How to improve follow up of patients is a key challenge | Gives insight into trends of practice and overall outcomes. Help give information on clinical and cost effectiveness. Helps compare interventions in terms of outcomes. Helps provide follow up data | NS | Data are anonymised to comply with UK data protection laws. The registry is hosted on a secure Dendrite server. To gain access to data, add, edit data, each user must have their own ID and password. Each user can only see their own data. Access to the database as a whole is restricted to the system administrator |
|----------|---------------------------------------------------------------|------|----------------------------------------|---------------------------------------------------------------------------|-----------------------------------------------------------------------------------------------------------------------------------------------------------|---------------------------------------------------------------------------------------------------------------------------------------------------------------|---------------------------------------------------------------------------------------------------------|--------------------------------------------------------------------------------------------------------------------------------------------------------------------------------------------------------------------------------------------------------------------------------------------------------------------------------------|--------------------------------------------------------------|----------|-------------------------------------------------------------------------------------------------------------------------------------------------------------------------------------------------------------------------------------------------------------------------------------------------------------------------------------------------------------------------------------------------|----|---------------------------------------------------------------------------------------------------------------------------------------------------------------------------------------------------------------------------------------------------------------------------------------------------------------------------------------------------------------------------------------------------------------------------------------------------------------------------------------------------------------------------------------------------------------------------------------------------------------------------------------------------------------------------------------------------------------------------------------------------------------------------------------------------------------------------------------------------------------------------------------------------------------------------------------------------------------------------------------------------------------------------------------------------------------------------------------------------------------------------------------------------------------------------------------------------------------------------------------------------------------------------------------------------------------------------------------------------------------------------------------------------------------------------------------------------------------------------------------------------------------------------------------------------------------------------------------------------------------------------------------------------------------------------------------------------------------------------|------------------------------------------------------------------------------------------------------------------------------------------------------------------------------------------------------------------------------------------------------------------------------------------------------------------------------------------------------------------------------------------------------------------------------------------------------------------------------------------------------------------------------------------------------------------------------------------------------------------------------------------------------------------------------------|------------------------------------------------------------------------------------------------------------------------------------------------------------|-------------------------------------------------------------------------------------------------------------------------------------------------------------------------------------------------------------------------------------------------------------------------------------------------------------------|---------------------------------------------------------|------------------------------------------------------------------------------------------------------------------------------------------------------------------------------------------------------|----|---------------------------------------------------------------------------------------------------------------------------------------------------------------------------------------------------------------------------------------------------------------------------------------------------------------------------|

boxes, drop  
down lists,  
limiting free-text  
boxes as much  
as possible,  
hover tip prompts  
to assist users,  
auto-calculations  
(eg for BMI), on  
screen data  
validation  
checks, soft  
mandatory fields  
(so the user is  
warned of  
incomplete key  
fields when  
moving to  
another screen,  
automated  
production of  
operation notes  
and clinic letters,  
auto save  
features, visual  
cues to help  
users know  
which part of the  
database they  
are in (eg gastric  
bypass screen).  
During the follow  
up consultations,  
doctors and  
nurses can enter  
the follow-up  
data in real time  
during the clinic  
visit. The  
software can  
then generate an  
automated  
follow-up letter  
which will  
include  
procedure  
details, weight  
loss over time (as  
a graph),  
comorbidity  
status and  
progress

For peer review only

1  
2  
3  
4  
5  
6  
7  
8  
9  
10  
11  
12  
13  
14  
15  
16  
17  
18  
19  
20  
21  
22  
23  
24  
25  
26  
27  
28  
29  
30  
31  
32  
33  
34  
35  
36  
37  
38  
39  
40  
41  
42  
43  
44  
45  
46  
47







1  
2  
3  
4  
5  
6  
7  
8  
9  
10  
11  
12  
13  
14  
15  
16  
17  
18  
19  
20  
21  
22  
23  
24  
25  
26  
27  
28  
29  
30  
31  
32  
33  
34  
35  
36  
37  
38  
39  
40  
41  
42  
43  
44  
45  
46  
47

For peer review

Trusts rely on clinical coders to extract information from unstructured medical records, and although this professional group has considerable expertise, selection of the most clinically appropriate codes requires close contact with clinicians. This rarely happens in the NHS. The electronic data collection process needs to be tempered with caution and that the right design for the system is crucial. A common thread among information technology (IT) projects in health has been their combination of ambition and limited appreciation of scale. This has perhaps been most apparent in the United Kingdom's £11.4 billion National Programme for IT, later renamed Connecting for Health. It is disappointing that the ambition of the project was not matched by delivery. In 2011 the National Audit Office concluded that the programme, as initially conceived, will now never be delivered.

improve care, as demonstrated by the cardiac surgeons from England who now boast one of the lowest mortality rates for cardiac surgery in Europe. Data matter because they are used by employers to make management decisions; by commissioners to determine how much money to pay for services; and by the government for its various schemes, such as NHS Choices. This is happening now, and in the future data will be increasingly used to assess the quality of services provided by hospitals, departments, and most likely eventually individual surgeons. Data can be gathered to assist in management discussions, such as departmental workload and resource planning, and for the purposes of audit and research. Most importantly, good data will enable clinicians and departments to improve their practice and the care they give

|              |                                                                                            |      |                                               |                                                                          |    |                                                    |                                                                                                                                  |                  |                                                               |    |                                                                                                                                                                                                                                                                         |                                                                                                                                                                   |                                                                                                                                                                               |                                                                                                                                                   |    |    |                                                                                                                                                                                                                                                                                                                                                                                                                                                                                                                                                                                                                                                                                                                                                                     |    |    |    |  |
|--------------|--------------------------------------------------------------------------------------------|------|-----------------------------------------------|--------------------------------------------------------------------------|----|----------------------------------------------------|----------------------------------------------------------------------------------------------------------------------------------|------------------|---------------------------------------------------------------|----|-------------------------------------------------------------------------------------------------------------------------------------------------------------------------------------------------------------------------------------------------------------------------|-------------------------------------------------------------------------------------------------------------------------------------------------------------------|-------------------------------------------------------------------------------------------------------------------------------------------------------------------------------|---------------------------------------------------------------------------------------------------------------------------------------------------|----|----|---------------------------------------------------------------------------------------------------------------------------------------------------------------------------------------------------------------------------------------------------------------------------------------------------------------------------------------------------------------------------------------------------------------------------------------------------------------------------------------------------------------------------------------------------------------------------------------------------------------------------------------------------------------------------------------------------------------------------------------------------------------------|----|----|----|--|
| Uberoi R.    | British society of interventional radiology: Biliary drainage and stenting registry (BDSR) | 2012 | Biliary Drainage and Stenting Registry (BDSR) | Percutaneous biliary drainage (PTBD) with or without adjunctive stenting | NS | British Society of Interventional Radiology (BSIR) | To assess current practice in the United Kingdom and use the data collected to provide guidance for improvements in patient care | Web-based system | The registry was funded by the BSIR on behalf of its members. | NS | Demographic, pre- and postintervention laboratory data, technical and clinical outcomes at discharge, known diagnosis, indications for procedure, procedural information, antibiotic prophylaxis, general anaesthetic/sedation, complications (morbidity and mortality) | Collection and analysis was performed by Dendrite Clinical Systems Ltd, utilising Microsoft Access, Excel, and Crystal Reports XI from business objects software. | Appropriate time and resources need to be allocated to allow good quality data collection, which should form an essential part of medical practice to maintain high standards | From November 1, 2006 to August 19, 2009: 833 procedures were recorded and entered by 62 operators from 44 institutions within the United Kingdom | NS | NS | Time pressures and other NHS commitments act as a disincentive. One of the major deficiencies of the registry was that the cause of death was not established, this will be one of the goals of future data collection and analysis. Data quality and completeness is a significant concern in this registry, which represents a prospective voluntary data collection. A criticism of voluntary registries is that data entry often is incomplete and they represent a nonconsecutive patient group and may not be representative of the entire treated patient population. It is likely that some questions and the terminology used were not clear to all operators. For example, operators were asked to stratify patients' complications into minor and major. | NS | NS | NS |  |
| Das N.       |                                                                                            |      |                                               |                                                                          |    |                                                    |                                                                                                                                  |                  |                                                               |    |                                                                                                                                                                                                                                                                         |                                                                                                                                                                   |                                                                                                                                                                               |                                                                                                                                                   |    |    |                                                                                                                                                                                                                                                                                                                                                                                                                                                                                                                                                                                                                                                                                                                                                                     |    |    |    |  |
| Moss J.      |                                                                                            |      |                                               |                                                                          |    |                                                    |                                                                                                                                  |                  |                                                               |    |                                                                                                                                                                                                                                                                         |                                                                                                                                                                   |                                                                                                                                                                               |                                                                                                                                                   |    |    |                                                                                                                                                                                                                                                                                                                                                                                                                                                                                                                                                                                                                                                                                                                                                                     |    |    |    |  |
| Robertson I. |                                                                                            |      |                                               |                                                                          |    |                                                    |                                                                                                                                  |                  |                                                               |    |                                                                                                                                                                                                                                                                         |                                                                                                                                                                   |                                                                                                                                                                               |                                                                                                                                                   |    |    |                                                                                                                                                                                                                                                                                                                                                                                                                                                                                                                                                                                                                                                                                                                                                                     |    |    |    |  |



| Author           | Study Title                                                                                                                  | Year | Study Type       | Intervention                                    | Comparator                                                                                                          | Outcomes                                                                                                            | Quality                                                                                                                                                                                                                                                                                                                                                                | Confidence | Notes | Quality | Confidence | Notes | Quality | Confidence | Notes | Quality | Confidence | Notes |    |
|------------------|------------------------------------------------------------------------------------------------------------------------------|------|------------------|-------------------------------------------------|---------------------------------------------------------------------------------------------------------------------|---------------------------------------------------------------------------------------------------------------------|------------------------------------------------------------------------------------------------------------------------------------------------------------------------------------------------------------------------------------------------------------------------------------------------------------------------------------------------------------------------|------------|-------|---------|------------|-------|---------|------------|-------|---------|------------|-------|----|
| Wood D.E.        | Long-term outcomes after transcatheter aortic valve implantation surgery                                                     | 2011 | UK TAVI Registry | Transcatheter Aortic Valve implantation surgery | Society for Cardiothoracic Surgery in Great Britain and Ireland and the British Cardiovascular Intervention Society | Society for Cardiothoracic Surgery in Great Britain and Ireland and the British Cardiovascular Intervention Society | Aim of registry: To coordinate and monitor the practice and dissemination of TAVI. The purpose of this project was to define the characteristics and clinical outcomes of the patient population treated with TAVI (regardless of technology or access route) in every (i.e., nonselected) center undertaking TAVI                                                     | NS         | NS    | NS      | NS         | NS    | NS      | NS         | NS    | NS      | NS         | NS    | NS |
| Ludman P.        | transcatheter aortic valve implantation in high-risk patients with severe aortic stenosis: The U.K. TAVI (United Kingdom     |      |                  |                                                 |                                                                                                                     |                                                                                                                     |                                                                                                                                                                                                                                                                                                                                                                        |            |       |         |            |       |         |            |       |         |            |       |    |
| De Belder M.A.   | transcatheter aortic valve implantation in high-risk patients with severe aortic stenosis: The U.K. TAVI (United Kingdom     |      |                  |                                                 |                                                                                                                     |                                                                                                                     |                                                                                                                                                                                                                                                                                                                                                                        |            |       |         |            |       |         |            |       |         |            |       |    |
| Bridgewater B.   | transcatheter aortic valve implantation) registry                                                                            |      |                  |                                                 |                                                                                                                     |                                                                                                                     |                                                                                                                                                                                                                                                                                                                                                                        |            |       |         |            |       |         |            |       |         |            |       |    |
| Cunningham A.D.  | transcatheter aortic valve implantation) registry                                                                            |      |                  |                                                 |                                                                                                                     |                                                                                                                     |                                                                                                                                                                                                                                                                                                                                                                        |            |       |         |            |       |         |            |       |         |            |       |    |
| Young C.P.       | transcatheter aortic valve implantation) registry                                                                            |      |                  |                                                 |                                                                                                                     |                                                                                                                     |                                                                                                                                                                                                                                                                                                                                                                        |            |       |         |            |       |         |            |       |         |            |       |    |
| Thomas M.        | transcatheter aortic valve implantation) registry                                                                            |      |                  |                                                 |                                                                                                                     |                                                                                                                     |                                                                                                                                                                                                                                                                                                                                                                        |            |       |         |            |       |         |            |       |         |            |       |    |
| Kovac J.         | transcatheter aortic valve implantation) registry                                                                            |      |                  |                                                 |                                                                                                                     |                                                                                                                     |                                                                                                                                                                                                                                                                                                                                                                        |            |       |         |            |       |         |            |       |         |            |       |    |
| Spyt T.          | transcatheter aortic valve implantation) registry                                                                            |      |                  |                                                 |                                                                                                                     |                                                                                                                     |                                                                                                                                                                                                                                                                                                                                                                        |            |       |         |            |       |         |            |       |         |            |       |    |
| MacCarthy P.A.   | transcatheter aortic valve implantation) registry                                                                            |      |                  |                                                 |                                                                                                                     |                                                                                                                     |                                                                                                                                                                                                                                                                                                                                                                        |            |       |         |            |       |         |            |       |         |            |       |    |
| Wendler O.       | transcatheter aortic valve implantation) registry                                                                            |      |                  |                                                 |                                                                                                                     |                                                                                                                     |                                                                                                                                                                                                                                                                                                                                                                        |            |       |         |            |       |         |            |       |         |            |       |    |
| Hildick-Smith D. | transcatheter aortic valve implantation) registry                                                                            |      |                  |                                                 |                                                                                                                     |                                                                                                                     |                                                                                                                                                                                                                                                                                                                                                                        |            |       |         |            |       |         |            |       |         |            |       |    |
| Davies S.W.      | transcatheter aortic valve implantation) registry                                                                            |      |                  |                                                 |                                                                                                                     |                                                                                                                     |                                                                                                                                                                                                                                                                                                                                                                        |            |       |         |            |       |         |            |       |         |            |       |    |
| Trivedi U.       | transcatheter aortic valve implantation) registry                                                                            |      |                  |                                                 |                                                                                                                     |                                                                                                                     |                                                                                                                                                                                                                                                                                                                                                                        |            |       |         |            |       |         |            |       |         |            |       |    |
| Blackman D.J.    | transcatheter aortic valve implantation) registry                                                                            |      |                  |                                                 |                                                                                                                     |                                                                                                                     |                                                                                                                                                                                                                                                                                                                                                                        |            |       |         |            |       |         |            |       |         |            |       |    |
| Levy R.D.        | transcatheter aortic valve implantation) registry                                                                            |      |                  |                                                 |                                                                                                                     |                                                                                                                     |                                                                                                                                                                                                                                                                                                                                                                        |            |       |         |            |       |         |            |       |         |            |       |    |
| Brecker S.J.D.   | transcatheter aortic valve implantation) registry                                                                            |      |                  |                                                 |                                                                                                                     |                                                                                                                     |                                                                                                                                                                                                                                                                                                                                                                        |            |       |         |            |       |         |            |       |         |            |       |    |
| Baumbach A.      | transcatheter aortic valve implantation) registry                                                                            |      |                  |                                                 |                                                                                                                     |                                                                                                                     |                                                                                                                                                                                                                                                                                                                                                                        |            |       |         |            |       |         |            |       |         |            |       |    |
| Daniel T.        | transcatheter aortic valve implantation) registry                                                                            |      |                  |                                                 |                                                                                                                     |                                                                                                                     |                                                                                                                                                                                                                                                                                                                                                                        |            |       |         |            |       |         |            |       |         |            |       |    |
| Gray H.          | transcatheter aortic valve implantation) registry                                                                            |      |                  |                                                 |                                                                                                                     |                                                                                                                     |                                                                                                                                                                                                                                                                                                                                                                        |            |       |         |            |       |         |            |       |         |            |       |    |
| Mullen M.J.      | transcatheter aortic valve implantation) registry                                                                            |      |                  |                                                 |                                                                                                                     |                                                                                                                     |                                                                                                                                                                                                                                                                                                                                                                        |            |       |         |            |       |         |            |       |         |            |       |    |
| Moller H.        | Completeness of case ascertainment and survival time error in English cancer registries: Impact on 1-year survival estimates | 2011 | Research paper   | Colorectal, lung, and breast cancer patients    | NS                                                                                                                  | NS                                                                                                                  | This study linked routine cancer registration records for colorectal, lung, and breast cancer patients with information from the Hospital Episode Statistics (HES) database for the period 2001–2007. Based on record linkage with the HES database, records missing in the cancer register were identified and the completeness of the cancer registers were assessed | NS         | NS    | NS      | NS         | NS    | NS      | NS         | NS    | NS      | NS         | NS    | NS |
| Richards S.      | Completeness of case ascertainment and survival time error in English cancer registries: Impact on 1-year survival estimates |      |                  |                                                 |                                                                                                                     |                                                                                                                     |                                                                                                                                                                                                                                                                                                                                                                        |            |       |         |            |       |         |            |       |         |            |       |    |
| Hanchett N.      | Completeness of case ascertainment and survival time error in English cancer registries: Impact on 1-year survival estimates |      |                  |                                                 |                                                                                                                     |                                                                                                                     |                                                                                                                                                                                                                                                                                                                                                                        |            |       |         |            |       |         |            |       |         |            |       |    |
| Riaz S.P.        | Completeness of case ascertainment and survival time error in English cancer registries: Impact on 1-year survival estimates |      |                  |                                                 |                                                                                                                     |                                                                                                                     |                                                                                                                                                                                                                                                                                                                                                                        |            |       |         |            |       |         |            |       |         |            |       |    |
| Luchtenborg M.   | Completeness of case ascertainment and survival time error in English cancer registries: Impact on 1-year survival estimates |      |                  |                                                 |                                                                                                                     |                                                                                                                     |                                                                                                                                                                                                                                                                                                                                                                        |            |       |         |            |       |         |            |       |         |            |       |    |
| Holmberg L.      | Completeness of case ascertainment and survival time error in English cancer registries: Impact on 1-year survival estimates |      |                  |                                                 |                                                                                                                     |                                                                                                                     |                                                                                                                                                                                                                                                                                                                                                                        |            |       |         |            |       |         |            |       |         |            |       |    |
| Robinson D.      | Completeness of case ascertainment and survival time error in English cancer registries: Impact on 1-year survival estimates |      |                  |                                                 |                                                                                                                     |                                                                                                                     |                                                                                                                                                                                                                                                                                                                                                                        |            |       |         |            |       |         |            |       |         |            |       |    |

For peer review only

Hospitals and surgeons can improve their results by learning from their own outcome statistics and those of their colleagues. Identifying, communicating and adopting 'best practices' may improve the quality of care nationwide. The most important advantage of these audit registries compared with clinical trials is the fact that they include the entire patient population without excluding certain patient groups. Benefits of these registries can be seen across Europe. For example in 2001, The Association of Coloproctology of Great Britain and Ireland (ACPGBI) started the National Bowel Cancer Audit Programme (NBOCAP). In 2008, 95% of trusts in England and Wales submitted data. Within 5 years, 30 day mortality dropped from 7% to 4.5%. National audit registries in surgical oncology have led to improvements with a greater impact on survival than any of the adjuvant therapies currently under study. Moreover, they offer the possibility to perform research on patient groups that are usually excluded from clinical trials such as the elderly

For peer review only

1  
2  
3  
4  
5  
6  
7  
8  
9  
10  
11  
12  
13  
14  
15  
16  
17  
18  
19  
20  
21  
22  
23  
24  
25  
26  
27  
28  
29  
30  
31  
32  
33  
34  
35  
36  
37  
38  
39  
40  
41  
42  
43  
44  
45  
46  
47



to look for hospitals of potential concern, followed up by targeted site visits to assess accuracy of data entry .

strategy to increase the research outputs from the database and has activated a data-sharing agreement for that purpose. There has been much debate over publishing named surgeon data, but what is without question is that there have been marked improvements in risk-adjusted mortality for cardiac surgery in the UK over the past 10 years. There is no evidence that the initiative to collect, benchmark and publish these data has been associated with significant 'risk-adverse' behaviour among surgeons in the UK. This should be reassuring to all stakeholders

For peer review only

1  
2  
3  
4  
5  
6  
7  
8  
9  
10  
11  
12  
13  
14  
15  
16  
17  
18  
19  
20  
21  
22  
23  
24  
25  
26  
27  
28  
29  
30  
31  
32  
33  
34  
35  
36  
37  
38  
39  
40  
41  
42  
43  
44  
45  
46  
47

1  
2  
3  
4  
5  
6  
7  
8  
9  
10  
11  
12  
13  
14  
15  
16  
17  
18  
19  
20  
21  
22  
23  
24  
25  
26  
27  
28  
29  
30  
31  
32  
33  
34  
35  
36  
37  
38  
39  
40  
41  
42  
43  
44  
45  
46  
47

|                                                                   |                                                                                                                         |                  |                                                                |                      |                                                                                                         |                             |                                                                                      |                                |                                             |                                                                                                                                                                                                                                                                                                                                                                                                                                                                                                                                                                                                                                                                                                                                                                                                                                                                                                                                                                                                                                                                                                                                    |                                                                                                                                                                                                                                                                                                                                                                                                                                                                                                                                                                                                                                                                                                                                                                                                                                                                                                                                                                                                                                                                                                       |                                                                                                                                                                                                                                                                                                                                                   |                                                                                                                                                                                                                                                                                                                                                                                                                                                                                                                                                                                                                                                                                                                                                                                                                                                                                                                                                                                                                                                                                                                                                                                                                                                                                                              |           |           |                                                                                                                                                                                                                                                                                                                                                                                                                                                                                                                                                                                                                                                                        |                                                                                                                                                                           |           |                                                                                                                                                                                                                                                                                                                                                                                                                                                                                                                                                                                                                                                                                                                                     |
|-------------------------------------------------------------------|-------------------------------------------------------------------------------------------------------------------------|------------------|----------------------------------------------------------------|----------------------|---------------------------------------------------------------------------------------------------------|-----------------------------|--------------------------------------------------------------------------------------|--------------------------------|---------------------------------------------|------------------------------------------------------------------------------------------------------------------------------------------------------------------------------------------------------------------------------------------------------------------------------------------------------------------------------------------------------------------------------------------------------------------------------------------------------------------------------------------------------------------------------------------------------------------------------------------------------------------------------------------------------------------------------------------------------------------------------------------------------------------------------------------------------------------------------------------------------------------------------------------------------------------------------------------------------------------------------------------------------------------------------------------------------------------------------------------------------------------------------------|-------------------------------------------------------------------------------------------------------------------------------------------------------------------------------------------------------------------------------------------------------------------------------------------------------------------------------------------------------------------------------------------------------------------------------------------------------------------------------------------------------------------------------------------------------------------------------------------------------------------------------------------------------------------------------------------------------------------------------------------------------------------------------------------------------------------------------------------------------------------------------------------------------------------------------------------------------------------------------------------------------------------------------------------------------------------------------------------------------|---------------------------------------------------------------------------------------------------------------------------------------------------------------------------------------------------------------------------------------------------------------------------------------------------------------------------------------------------|--------------------------------------------------------------------------------------------------------------------------------------------------------------------------------------------------------------------------------------------------------------------------------------------------------------------------------------------------------------------------------------------------------------------------------------------------------------------------------------------------------------------------------------------------------------------------------------------------------------------------------------------------------------------------------------------------------------------------------------------------------------------------------------------------------------------------------------------------------------------------------------------------------------------------------------------------------------------------------------------------------------------------------------------------------------------------------------------------------------------------------------------------------------------------------------------------------------------------------------------------------------------------------------------------------------|-----------|-----------|------------------------------------------------------------------------------------------------------------------------------------------------------------------------------------------------------------------------------------------------------------------------------------------------------------------------------------------------------------------------------------------------------------------------------------------------------------------------------------------------------------------------------------------------------------------------------------------------------------------------------------------------------------------------|---------------------------------------------------------------------------------------------------------------------------------------------------------------------------|-----------|-------------------------------------------------------------------------------------------------------------------------------------------------------------------------------------------------------------------------------------------------------------------------------------------------------------------------------------------------------------------------------------------------------------------------------------------------------------------------------------------------------------------------------------------------------------------------------------------------------------------------------------------------------------------------------------------------------------------------------------|
| <p>Kearins O.<br/>Monyppenny I.<br/>Lagord C.<br/>Lawrence G.</p> | <p>Clinical outcome data for symptomatic breast cancer: The breast cancer clinical outcome measures (BCCOM) project</p> | <p>200<br/>9</p> | <p>Breast Cancer Clinical Outcome Measures (BCCOM) Project</p> | <p>Breast cancer</p> | <p>Association of Breast Surgeons, the UKACR (UK Association of Cancer Registries), Breast surgeons</p> | <p>BCCOM Steering Group</p> | <p>To capture monitor current practice of treatment of symptomatic breast cancer</p> | <p>By BCCOM Steering Group</p> | <p>Breakthrough Breast Cancer (charity)</p> | <p>Demographics, diagnosis information, tumour characteristics, surrogate outcome measures: 1) Number and proportion of breast cancers for which complete information is received 2) Number of symptomatic and screen-detected breast cancers treated in a hospital per annum 3) Number and proportion of breast cancers given medical treatment only 5) Number and proportion of breast cancers treated surgically 6) Mastectomy rate by breast size: &lt;15 &gt; 15 and &lt;20; &gt;20 and &lt;35; &gt;35 and &lt;50; &gt;50 mm invasive diameter 7) Number and proportion of invasive breast cancers for which nodal status is known 8) Number and proportion of histologically node-negative invasive breast cancers for which more than seven nodes were harvested 9) Number and proportion of invasive breast cancers treated by breast-conserving surgery and receiving radiotherapy 10) Number and proportion of node-positive patients with invasive breast cancers, aged &lt;60 years, receiving chemotherapy, number and proportion of patients with ER-positive invasive breast cancers, receiving hormone therapy</p> | <p>Data on all newly-diagnosed primary symptomatic breast cancers are obtained from the UK cancer registries. To validate the accuracy of data collection, cancer registries send the collected data to the concerned consultant breast surgeon. The surgeons in turn are asked to check the validity of data by comparing them with those held on local systems, to make amendments if necessary and to return the data without patient-identifiable details to the BCCOM (Breast Cancer Clinical Outcome Measures) Project team at the West Midlands Cancer Intelligence Unit (WMCIU). Surgeons may submit unchecked data if they do not have the necessary support mechanisms or if they are convinced that the quality of the data is high. Cases are not included if the surgeon attends less than six symptomatic cases in the year, chooses not to participate or is unknown. Cancer registry data are now matched to data held in national data sets, such as Hospital Episode Statistics (HES) - this is useful in collecting data missed by the registry and for cross checking of data</p> | <p>Participation by breast surgeons in the BCCOM Project is not mandatory, but it is strongly encouraged by their professional body, the ABS (Association of Breast Surgeons). The regional symptomatic representatives of ABS are encouraged to review participation in their own areas and to identify ways in which this could be improved</p> | <p>In year 3, 221/488 eligible surgeons submitted data; 16739/32113 cases were submitted. In year 2 (cases diagnosed in 2003), there was a 14% reduction in the total number of cases submitted (14 120 compared with 16 407) and very large reductions in some regions. These decreases are in part because of the more reliable exclusion of ineligible screen-detected cases in year 2, but mainly result from changes in the protocols for data collection in year 2, which required written consent from all surgeons before releasing the data of patients under their care to the lead surgeon in each hospital for validation. In year 3 (cases diagnosed in 2004), the UK cancer registries supplied the BCCOM team with data on all 48 983 diagnosed breast cancers. This provided a denominator of the total number of eligible cases with which participation could be compared and an estimate of the annual breast cancer burden in the United Kingdom could be made. Wales had the highest recruitment of cases at 94%, and the Thames Region, which has the highest number of surgeons and the most number of cases, had by far the lowest recruitment at 29%. In addition to the 1219 cases (3%), which were excluded in year 3 because the surgeons treated fewer than six symptomatic</p> | <p>NS</p> | <p>NS</p> | <p>Initially, (before the BCCOM project started) the capturing of data on symptomatic breast surgery was not funded; and whilst initially they captured 1/3rd of the population caseload, many collaborators failed to continue owing to lack of funding. Although progress in data collection has been improved by central notification of surgeons in most regions, the data underline the continuing difficulty in depending on the voluntary and active participation of individual surgeons in the submission and validation of data. Surgeons must give written permission for release of patient details - but this has not been good for data completeness</p> | <p>Regular audit of surgical practice improves standards and highlights outliers. This BCCOM audit enabled identification of regional variations in surgical practice</p> | <p>NS</p> | <p>From year 2 onwards, the initial protocol for data collection was modified to ensure compliance with Section 60 of the Health and Social Care Act 2001. It was observed that, although non-identifiable data were stored in the BCCOM central database, the flow of information at the beginning of the audit cycle, from cancer registry to surgeon for validation, was at an individual patient level. Therefore, the updated protocol requested that cancer registries obtain consent of individual consultant surgeons before releasing the data to the lead breast surgeon in each hospital. Surgeons must give written permission to for release of patient details - but this has not been good for data completeness</p> |
|-------------------------------------------------------------------|-------------------------------------------------------------------------------------------------------------------------|------------------|----------------------------------------------------------------|----------------------|---------------------------------------------------------------------------------------------------------|-----------------------------|--------------------------------------------------------------------------------------|--------------------------------|---------------------------------------------|------------------------------------------------------------------------------------------------------------------------------------------------------------------------------------------------------------------------------------------------------------------------------------------------------------------------------------------------------------------------------------------------------------------------------------------------------------------------------------------------------------------------------------------------------------------------------------------------------------------------------------------------------------------------------------------------------------------------------------------------------------------------------------------------------------------------------------------------------------------------------------------------------------------------------------------------------------------------------------------------------------------------------------------------------------------------------------------------------------------------------------|-------------------------------------------------------------------------------------------------------------------------------------------------------------------------------------------------------------------------------------------------------------------------------------------------------------------------------------------------------------------------------------------------------------------------------------------------------------------------------------------------------------------------------------------------------------------------------------------------------------------------------------------------------------------------------------------------------------------------------------------------------------------------------------------------------------------------------------------------------------------------------------------------------------------------------------------------------------------------------------------------------------------------------------------------------------------------------------------------------|---------------------------------------------------------------------------------------------------------------------------------------------------------------------------------------------------------------------------------------------------------------------------------------------------------------------------------------------------|--------------------------------------------------------------------------------------------------------------------------------------------------------------------------------------------------------------------------------------------------------------------------------------------------------------------------------------------------------------------------------------------------------------------------------------------------------------------------------------------------------------------------------------------------------------------------------------------------------------------------------------------------------------------------------------------------------------------------------------------------------------------------------------------------------------------------------------------------------------------------------------------------------------------------------------------------------------------------------------------------------------------------------------------------------------------------------------------------------------------------------------------------------------------------------------------------------------------------------------------------------------------------------------------------------------|-----------|-----------|------------------------------------------------------------------------------------------------------------------------------------------------------------------------------------------------------------------------------------------------------------------------------------------------------------------------------------------------------------------------------------------------------------------------------------------------------------------------------------------------------------------------------------------------------------------------------------------------------------------------------------------------------------------------|---------------------------------------------------------------------------------------------------------------------------------------------------------------------------|-----------|-------------------------------------------------------------------------------------------------------------------------------------------------------------------------------------------------------------------------------------------------------------------------------------------------------------------------------------------------------------------------------------------------------------------------------------------------------------------------------------------------------------------------------------------------------------------------------------------------------------------------------------------------------------------------------------------------------------------------------------|

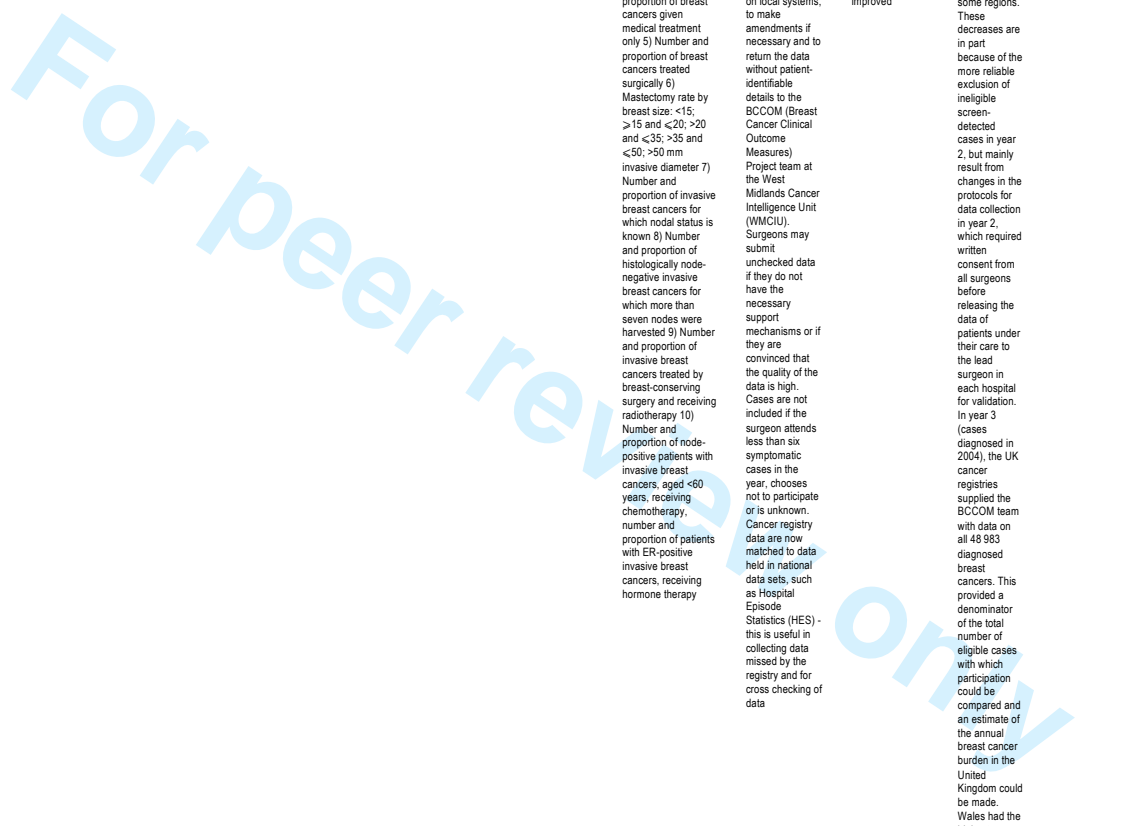

cases, a further 21 220 symptomatic cases (54% of the total number of symptomatic cases identified by the cancer registries) could not be included either because the surgeon was non-compliant (15 471 cases) or unknown (5749 cases)

For peer review only

1  
2  
3  
4  
5  
6  
7  
8  
9  
10  
11  
12  
13  
14  
15  
16  
17  
18  
19  
20  
21  
22  
23  
24  
25  
26  
27  
28  
29  
30  
31  
32  
33  
34  
35  
36  
37  
38  
39  
40  
41  
42  
43  
44  
45  
46  
47

|                                                          |                                                                                     |      |                                  |                          |                                                                                                                           |                                                              |                                                                                                                                                                                                                                                                              |                                                                                                                                                                                                                                                                                                                                                                                                                                                                                                                                                                                                                                                                                                                                         |    |                                                                                                                               |                                                                                                                                                                                             |                                                                                                                                                                                                                                                                                                                                                                                             |                                                                                                                                                                                                                                                                                                                                                                                        |                                                                                                                                                                                                                                                                                                                                                                                           |    |    |                                                                                                                                                                                                                                                                                                                                                                                                                                                                                                                                                                                                                                                                                                                                                                               |                                                                                                                                   |    |                                                                                                                                                                               |
|----------------------------------------------------------|-------------------------------------------------------------------------------------|------|----------------------------------|--------------------------|---------------------------------------------------------------------------------------------------------------------------|--------------------------------------------------------------|------------------------------------------------------------------------------------------------------------------------------------------------------------------------------------------------------------------------------------------------------------------------------|-----------------------------------------------------------------------------------------------------------------------------------------------------------------------------------------------------------------------------------------------------------------------------------------------------------------------------------------------------------------------------------------------------------------------------------------------------------------------------------------------------------------------------------------------------------------------------------------------------------------------------------------------------------------------------------------------------------------------------------------|----|-------------------------------------------------------------------------------------------------------------------------------|---------------------------------------------------------------------------------------------------------------------------------------------------------------------------------------------|---------------------------------------------------------------------------------------------------------------------------------------------------------------------------------------------------------------------------------------------------------------------------------------------------------------------------------------------------------------------------------------------|----------------------------------------------------------------------------------------------------------------------------------------------------------------------------------------------------------------------------------------------------------------------------------------------------------------------------------------------------------------------------------------|-------------------------------------------------------------------------------------------------------------------------------------------------------------------------------------------------------------------------------------------------------------------------------------------------------------------------------------------------------------------------------------------|----|----|-------------------------------------------------------------------------------------------------------------------------------------------------------------------------------------------------------------------------------------------------------------------------------------------------------------------------------------------------------------------------------------------------------------------------------------------------------------------------------------------------------------------------------------------------------------------------------------------------------------------------------------------------------------------------------------------------------------------------------------------------------------------------------|-----------------------------------------------------------------------------------------------------------------------------------|----|-------------------------------------------------------------------------------------------------------------------------------------------------------------------------------|
| N. Chalmers, K. Jones, K. Drinkwater, R. Uberoi, J. Tawn | The UK nephrostomy audit. Can a voluntary registry produce robust performance data? | 2008 | UK national nephrostomy registry | Percutaneous nephrostomy | Royal College of Radiologists Clinical Radiology Audit Sub-Committee (CRASC), British Society of Interventional Radiology | CRASC and NATCANSAT (National Cancer Services Analysis Team) | To investigate the effectiveness of the Royal College of Radiologists Audit Sub-Committee's national prospective registry of percutaneous nephrostomy. The registry aims to enable participants to audit their practice and compare performance with predetermined standards | An initial retrospective pilot audit was undertaken by the CRASC involving case note review. This helped develop the prospective registry. Web-based dataset was designed for rapid completion. The software used was written by National Cancer Services Analysis Team (NATCANSAT) who created a web-based application, providing a standardized approach to data collection, with the use of drop down menus and a minimum of free-text fields, and avoiding the need for participants to download or install any software. The website was written in Microsoft ASP and data was stored in a Microsoft Access database (www.microsoft.com). NATCANSAT also provided telephone and helpline support to participants between the hours | NS | Have a compromise between ease of data collection and thoroughness. Use of drop down menus and a minimum of free-text fields. | Potential risk factors, operator experience, indication, timing of procedure (in/out of hours), side of operation, procedural data, procedure success, procedure repeat rate, complications | National Cancer Services Analysis Team (NATCANSAT) (www.canceruk.net) was commissioned to write the software to support the data collection process. A registry in which external bodies could have confidence would require independent validation of data entries for accuracy and completeness. This would require significant investment in resources and a higher degree of commitment | The web-based dataset was designed for rapid completion with a compromise between brevity and thoroughness. Data could be entered via use of drop down menus and a minimum of free-text fields, and participants didn't need to download or install any software. There was also telephone and e-mail helpline support to participants between the hours of 9 am–5:30 pm Monday–Friday | 3200 cases were accumulated over a period of 26 months - this is far from a complete sample of national practice. A few departments contributed data on all, or nearly all, their cases. A larger number of hospitals contributed only a small proportion of their cases and most contributed none at all. Fewer than 30% of the acute hospitals that were contacted contributed any data | NS | NS | Objective independent scrutiny of each operator's returns is impossible, so there is no way to assess the completeness and accuracy of the submitted data. Therefore, it is impossible to know how representative the data are. Despite efforts at the outset to produce a simple dataset, it is apparent that some contributors interpreted the form differently from others. This demonstrates the near-impossibility of devising a form that is unambiguous, while at the same time maintaining brevity such that individuals are not deterred from contributing by the length of the form. The data are not sufficiently robust to permit patients, purchasers, or regulatory authorities to make any inference about the standard of nephrostomy provision of any centre | Individual doctors have a duty, defined by the General Medical Council, to audit their own performance. Registry lets you do that | NS | Data was stored in a Microsoft Access database. For confidentiality reasons, no patient identifiable data items, such as name, NHS number, or address/postcode, were recorded |
|----------------------------------------------------------|-------------------------------------------------------------------------------------|------|----------------------------------|--------------------------|---------------------------------------------------------------------------------------------------------------------------|--------------------------------------------------------------|------------------------------------------------------------------------------------------------------------------------------------------------------------------------------------------------------------------------------------------------------------------------------|-----------------------------------------------------------------------------------------------------------------------------------------------------------------------------------------------------------------------------------------------------------------------------------------------------------------------------------------------------------------------------------------------------------------------------------------------------------------------------------------------------------------------------------------------------------------------------------------------------------------------------------------------------------------------------------------------------------------------------------------|----|-------------------------------------------------------------------------------------------------------------------------------|---------------------------------------------------------------------------------------------------------------------------------------------------------------------------------------------|---------------------------------------------------------------------------------------------------------------------------------------------------------------------------------------------------------------------------------------------------------------------------------------------------------------------------------------------------------------------------------------------|----------------------------------------------------------------------------------------------------------------------------------------------------------------------------------------------------------------------------------------------------------------------------------------------------------------------------------------------------------------------------------------|-------------------------------------------------------------------------------------------------------------------------------------------------------------------------------------------------------------------------------------------------------------------------------------------------------------------------------------------------------------------------------------------|----|----|-------------------------------------------------------------------------------------------------------------------------------------------------------------------------------------------------------------------------------------------------------------------------------------------------------------------------------------------------------------------------------------------------------------------------------------------------------------------------------------------------------------------------------------------------------------------------------------------------------------------------------------------------------------------------------------------------------------------------------------------------------------------------------|-----------------------------------------------------------------------------------------------------------------------------------|----|-------------------------------------------------------------------------------------------------------------------------------------------------------------------------------|



1  
2  
3  
4  
5  
6  
7  
8  
9  
10  
11  
12  
13  
14  
15  
16  
17  
18  
19  
20  
21  
22  
23  
24  
25  
26  
27  
28  
29  
30  
31  
32  
33  
34  
35  
36  
37  
38  
39  
40  
41  
42  
43  
44  
45  
46  
47

|             |                                                    |      |                                                                                                                                                                                 |                            |    |    |                                                                                                                                                                                                                                                                                                                                                                                                                                  |    |                                  |    |    |                                                                                                                                                                                                                                                                                                                                                                                                                                                                                                                                                                                                                                                                                                                                                                                                                                                                                                                                                                                                                                                                                                                                                                                                                                                        |                                                                                                                                                                                                                                                                                                                                                                                                                                                                                                                                                                                                                                                          |    |                                                                                                                                    |    |                                                                                                                                                                                                                          |                                                                                 |    |                                                                        |
|-------------|----------------------------------------------------|------|---------------------------------------------------------------------------------------------------------------------------------------------------------------------------------|----------------------------|----|----|----------------------------------------------------------------------------------------------------------------------------------------------------------------------------------------------------------------------------------------------------------------------------------------------------------------------------------------------------------------------------------------------------------------------------------|----|----------------------------------|----|----|--------------------------------------------------------------------------------------------------------------------------------------------------------------------------------------------------------------------------------------------------------------------------------------------------------------------------------------------------------------------------------------------------------------------------------------------------------------------------------------------------------------------------------------------------------------------------------------------------------------------------------------------------------------------------------------------------------------------------------------------------------------------------------------------------------------------------------------------------------------------------------------------------------------------------------------------------------------------------------------------------------------------------------------------------------------------------------------------------------------------------------------------------------------------------------------------------------------------------------------------------------|----------------------------------------------------------------------------------------------------------------------------------------------------------------------------------------------------------------------------------------------------------------------------------------------------------------------------------------------------------------------------------------------------------------------------------------------------------------------------------------------------------------------------------------------------------------------------------------------------------------------------------------------------------|----|------------------------------------------------------------------------------------------------------------------------------------|----|--------------------------------------------------------------------------------------------------------------------------------------------------------------------------------------------------------------------------|---------------------------------------------------------------------------------|----|------------------------------------------------------------------------|
| Clarke D.R. | Verification of data in congenital cardiac surgery | 2008 | This paper reviews 3 registries: The Society of Thoracic Surgeons, The European Association for Cardio-Thoracic Surgery, and The United Kingdom Central Cardiac Audit Database. | Congenital cardiac surgery | NS | NS | This paper reviews the current strategies used for verification of the data in the congenital databases of The Society of Thoracic Surgeons (america), The European Association for Cardio-Thoracic Surgery (europe), and The United Kingdom Central Cardiac Audit Database (UK). The Central Cardiac Audit Database aimed to provide national analyses of outcomes after cardiovascular surgery and therapeutic catheterization | NS | The UK registry is funded by DOH | NS | NS | For UK registry (The Central Cardiac Audit Database): Data are collected electronically in an anonymous encrypted format with prospective tracking of mortality and re-intervention using up to a 40 field minimum dataset. In the UK registry, the verification process begins at the congenital cardiac centre. Most of the 13 cardiac units in the United Kingdom have database managers who check for data accuracy with medical staff before the data is submitted. Independent validation of the patient's status (alive or dead) is achieved by central tracking using the linkage of each patient's National Health Service number to the Office of National Statistics, where the death of every resident in England and Wales is registered. Data verification audit site visits are very effective at drawing attention to the importance of high quality data. The visits can also provide "ammunition" for convincing institutional administration to commit appropriate resources to data management. In the UK registry, each unit is visited for one/two days each year by a specialist database nurse administrator from the Central Cardiac Audit Database and a volunteer surgeon or another unit. A detailed pre-visit proforma is | The audits can benefit participating centres by validating methods that are effective and by identifying ineffective practices and providing suggestions for improvement. Public interest in medical outcomes is at an all time high and increasing focus on "pay for performance". The need for accurate, complete and high quality Congenital Heart Surgery outcome data has never been more pressing. For the UK registry (Central Cardiac Audit Database), data submission is compulsory for all centres undertaking congenital cardiac disease surgery. External monitoring of performance gives an incentive to provide accurate and complete data | NS | For the UK registry centre specific results are now published on the World Wide Web allowing free access to families and the media | NS | For the UK registry: ideally, every medical record of the approximately 8,000 patients undergoing procedures each year should be examined. However, there is a lack of funding and skilled manpower for such an activity | Patients included in medical audit have better outcomes than those not included | NS | In the UK registry, patients give informed consent for data submission |
|-------------|----------------------------------------------------|------|---------------------------------------------------------------------------------------------------------------------------------------------------------------------------------|----------------------------|----|----|----------------------------------------------------------------------------------------------------------------------------------------------------------------------------------------------------------------------------------------------------------------------------------------------------------------------------------------------------------------------------------------------------------------------------------|----|----------------------------------|----|----|--------------------------------------------------------------------------------------------------------------------------------------------------------------------------------------------------------------------------------------------------------------------------------------------------------------------------------------------------------------------------------------------------------------------------------------------------------------------------------------------------------------------------------------------------------------------------------------------------------------------------------------------------------------------------------------------------------------------------------------------------------------------------------------------------------------------------------------------------------------------------------------------------------------------------------------------------------------------------------------------------------------------------------------------------------------------------------------------------------------------------------------------------------------------------------------------------------------------------------------------------------|----------------------------------------------------------------------------------------------------------------------------------------------------------------------------------------------------------------------------------------------------------------------------------------------------------------------------------------------------------------------------------------------------------------------------------------------------------------------------------------------------------------------------------------------------------------------------------------------------------------------------------------------------------|----|------------------------------------------------------------------------------------------------------------------------------------|----|--------------------------------------------------------------------------------------------------------------------------------------------------------------------------------------------------------------------------|---------------------------------------------------------------------------------|----|------------------------------------------------------------------------|

completed by each centre covering such areas as security and confidentiality, in-house verification and quality assurance, training for data collection and accuracy, communication issues, accountability, health records management, and timeliness of central submission. The visits are scheduled in the year following data submission. At the visit, all operating room and catheter laboratory logbooks are scrutinized to ensure procedural data accuracy and that all procedures have been captured. Also, a random selection of 20 patient hospital records is requested in advance and compared to the dataset submitted for missing or incorrect data. A Data Quality Indicator score is then calculated. The results have been encouraging with the scores improving over time from an average of 79% to 91% currently (range 81–98%). At the end of the visit, the unit clinicians meet with the auditors to discuss areas of excellence and deficiencies. Within weeks, a formal report is submitted back to the hospital team and to higher management. The visits are therefore seen by the congenital cardiac clinicians as very positive encounters. A combination of site visits to verify the data at the primary source of the data, and external verification of the data from independent databases or registries, such as governmental death registries, may be required to allow for optimal verification of data. It is important to verify the completeness and accuracy of data in congenital cardiac registries in the United Kingdom Central Cardiac Audit

For peer review only

1  
2  
3  
4  
5  
6  
7  
8  
9  
10  
11  
12  
13  
14  
15  
16  
17  
18  
19  
20  
21  
22  
23  
24  
25  
26  
27  
28  
29  
30  
31  
32  
33  
34  
35  
36  
37  
38  
39  
40  
41  
42  
43  
44  
45  
46  
47

Database reveals that hospital databases under-reported 42 operative deaths out of a total of 194 (21.6%). Similarly, the European Association for Cardio-Thoracic Surgery implemented a data verification process and discovered that 7 hospital deaths out of 68 (10.3%) were not reported.

For peer review only

1  
2  
3  
4  
5  
6  
7  
8  
9  
10  
11  
12  
13  
14  
15  
16  
17  
18  
19  
20  
21  
22  
23  
24  
25  
26  
27  
28  
29  
30  
31  
32  
33  
34  
35  
36  
37  
38  
39  
40  
41  
42  
43  
44  
45  
46  
47

|             |                                                                                                                                                     |      |                                     |                            |                                                                                                                                                                                         |                                               |                                                                                                                                                                                                                                                                                                                                                                                                                                                                                                                                                                                                                                                               |                                                                                                                                                                                                                                                   |                                                                           |                                                                                                                                                                                                                                                                                                                                                                                                                                                                                                                                                     |                                                                                                                                                                                                                                                                                                                                   |                                                                                                                                                                                                                                                                                                                                                                                                                                                                                                                                                                                           |                                                                                                                                                                                                                                                                                                                                                          |                                                                                                                                 |                                                                                                                                                                                                                                                                                                                                                                                                                                                                                                                                                                                                                                                                                                                                                                                                                                                                                                                                                                                                                                                                                                                                                                                                                                                                                                                                                                                                                                                                                                                                                   |    |    |                                                                                                                                                                                                                                                                                                                                                                                                                                                                                                                                                                                           |                                                                                                                                                                                                                                                                                                                                                                                                                                                                                                                                                                                                                                                                                                                                                                                                                                                                                                                                                                                                                                                       |
|-------------|-----------------------------------------------------------------------------------------------------------------------------------------------------|------|-------------------------------------|----------------------------|-----------------------------------------------------------------------------------------------------------------------------------------------------------------------------------------|-----------------------------------------------|---------------------------------------------------------------------------------------------------------------------------------------------------------------------------------------------------------------------------------------------------------------------------------------------------------------------------------------------------------------------------------------------------------------------------------------------------------------------------------------------------------------------------------------------------------------------------------------------------------------------------------------------------------------|---------------------------------------------------------------------------------------------------------------------------------------------------------------------------------------------------------------------------------------------------|---------------------------------------------------------------------------|-----------------------------------------------------------------------------------------------------------------------------------------------------------------------------------------------------------------------------------------------------------------------------------------------------------------------------------------------------------------------------------------------------------------------------------------------------------------------------------------------------------------------------------------------------|-----------------------------------------------------------------------------------------------------------------------------------------------------------------------------------------------------------------------------------------------------------------------------------------------------------------------------------|-------------------------------------------------------------------------------------------------------------------------------------------------------------------------------------------------------------------------------------------------------------------------------------------------------------------------------------------------------------------------------------------------------------------------------------------------------------------------------------------------------------------------------------------------------------------------------------------|----------------------------------------------------------------------------------------------------------------------------------------------------------------------------------------------------------------------------------------------------------------------------------------------------------------------------------------------------------|---------------------------------------------------------------------------------------------------------------------------------|---------------------------------------------------------------------------------------------------------------------------------------------------------------------------------------------------------------------------------------------------------------------------------------------------------------------------------------------------------------------------------------------------------------------------------------------------------------------------------------------------------------------------------------------------------------------------------------------------------------------------------------------------------------------------------------------------------------------------------------------------------------------------------------------------------------------------------------------------------------------------------------------------------------------------------------------------------------------------------------------------------------------------------------------------------------------------------------------------------------------------------------------------------------------------------------------------------------------------------------------------------------------------------------------------------------------------------------------------------------------------------------------------------------------------------------------------------------------------------------------------------------------------------------------------|----|----|-------------------------------------------------------------------------------------------------------------------------------------------------------------------------------------------------------------------------------------------------------------------------------------------------------------------------------------------------------------------------------------------------------------------------------------------------------------------------------------------------------------------------------------------------------------------------------------------|-------------------------------------------------------------------------------------------------------------------------------------------------------------------------------------------------------------------------------------------------------------------------------------------------------------------------------------------------------------------------------------------------------------------------------------------------------------------------------------------------------------------------------------------------------------------------------------------------------------------------------------------------------------------------------------------------------------------------------------------------------------------------------------------------------------------------------------------------------------------------------------------------------------------------------------------------------------------------------------------------------------------------------------------------------|
| Jacobs M.L. | Databases for assessing the outcomes of the treatment of patients with congenital and paediatric cardiac disease—the perspective of cardiac surgery | 2008 | Central Cardiac Audit Database (UK) | Congenital cardiac surgery | The Central cardiac audit database was formed in collaboration with the British Cardiac Society, the Society of Cardiothoracic Surgeons, and the British Paediatric Cardiac Association | Respective society of the surgical speciality | This review discusses the rationale for the creation and maintenance of multi-institutional databases for congenital heart surgery, together with a history of the evolution of such databases. This review also describes several European and North American databases for pediatric and congenital cardiac surgery as well as the UK Central Cardiac Audit Database. We have collected data on general learning points and specific information on the UK Central Cardiac Audit Database. The UK Central Cardiac Audit Database monitors surgical and transcatheter cardiovascular interventions undertaken on patients with congenitally malformed hearts | The development of the Central Cardiac Audit Database involved the establishment of a team of experts to set up the computerised registry with robust protocols for the protection and validation of data. Electronic data collection (encrypted) | For the Central Cardiac Audit Database, funding is centrally from the DOH | International Congenital Heart Surgery Nomenclature and Database Project in September 1998. This led to the publication of a common nomenclature and a common core minimal data set that were enthusiastically accepted by the majority of cardiac databases/societies worldwide. While it is useful to collect data on mortality, fortunately most patients do not die - it is therefore very important to collect data on morbidity. The resource utilisation, QOL. A common clinical language (nomenclature) is fundamental for registry success | Demographics, risk factors, co-morbidity, diagnosis, procedure, mortality, complications, length of stay, time to extubation, and utilization of resources. For the Central Cardiac Audit Database, there were initially 20 data fields. After 2 years there was a gradual expansion of the fields - now there are 40 data fields | Independent validation of the status of the patient as alive or dead is achieved by central mortality tracking using the linkage of the National Health Service number of the patient to the Office of National Statistics. For Central Cardiac Audit Database annual visits for the validation of data are undertaken to each hospital submitting data to ensure accuracy of the data and that all procedures undertaken have been captured. These visits also help identify how to improve database management. Whilst site visits are expensive and time consuming, they are essential | For the Central Cardiac Audit Database, there were local "audit facilitators" that encouraged clinicians to enter data and to validate the quality of data before submission. For the Central Cardiac Audit Database, it is compulsory for all centres carrying out interventions on patients with congenital cardiac malformations to submit their data | For Central Cardiac Audit Database, over 26,000 surgical procedures have been amassed at a current rate of over 4,500 each year | Annually, the committee responsible for the database of each Society issues to each participating institution a report consisting of aggregate data from all participating groups and institutions, de-identified with respect to source, and of data specific to the participant. Each institution receives a report of outcomes encompassing all of their annual activity, as well as cumulative activity over the years of participation. Each participant is therefore able to identify trends in their own practice, including outcomes such as mortality, complications, length of stay, and utilization of resources. For the Central Cardiac Audit Database (UK), underperforming units would receive constructive feedback, which focused, for example, on surgical techniques, intensive care support, or shortcomings in the 'system' or infrastructure. For the Central Cardiac Audit Database, results have been published on the web, with free access to families and the media providing details of outcomes after major surgical procedures and transcatheter procedures. It is important to reduce the time between the actual clinical event (the operation) and the release of the data. Important to realise that outcomes of extremely complex cases are likely to be less favourable than those of cases of lesser complexity. The recognition of this problem led to the development of a system to stratify operative procedures for congenital cardiac diseases in terms of complexity. The system adjusts for baseline | NS | NS | Events such as the Bristol Royal Infirmary have informed us that we need registry databases to facilitate programs of quality assessment and quality improvement. Furthermore, such events including the sometimes misleading reporting of data of uncertain quality, emphasise the importance of clinicians, with their professional societies to take the responsibility of data analysis and reporting. Enables sharing of data and comparing trends in their own practice, including institutions and countries. This helps define areas of weakness to enable continuous improvement | Registry Databases are distinguished in principle from "Research Databases" in that they are designed to catalogue essential information, in less voluminous detail per patient than is practical in a research database, but with the goal of having the information on all patients. Registry data must be timely, freely available with good degree of data capture. It should contribute to education, research, the allocation of resources, the analysis of outcomes, and the improvement of quality. A successful registry is one in which the data are complete. There are five fundamental elements that are essential to success in a multi-institutional registry database: 1) a common language or nomenclature, acceptable and familiar to all participants. 2) an established uniform core dataset. 3) a mechanism of evaluating the complexity of the operations. 4) a mechanism to ensure and verify the completeness and accuracy of the data. 5) a platform that enables collaboration between medical and surgical subspecialties. |
|-------------|-----------------------------------------------------------------------------------------------------------------------------------------------------|------|-------------------------------------|----------------------------|-----------------------------------------------------------------------------------------------------------------------------------------------------------------------------------------|-----------------------------------------------|---------------------------------------------------------------------------------------------------------------------------------------------------------------------------------------------------------------------------------------------------------------------------------------------------------------------------------------------------------------------------------------------------------------------------------------------------------------------------------------------------------------------------------------------------------------------------------------------------------------------------------------------------------------|---------------------------------------------------------------------------------------------------------------------------------------------------------------------------------------------------------------------------------------------------|---------------------------------------------------------------------------|-----------------------------------------------------------------------------------------------------------------------------------------------------------------------------------------------------------------------------------------------------------------------------------------------------------------------------------------------------------------------------------------------------------------------------------------------------------------------------------------------------------------------------------------------------|-----------------------------------------------------------------------------------------------------------------------------------------------------------------------------------------------------------------------------------------------------------------------------------------------------------------------------------|-------------------------------------------------------------------------------------------------------------------------------------------------------------------------------------------------------------------------------------------------------------------------------------------------------------------------------------------------------------------------------------------------------------------------------------------------------------------------------------------------------------------------------------------------------------------------------------------|----------------------------------------------------------------------------------------------------------------------------------------------------------------------------------------------------------------------------------------------------------------------------------------------------------------------------------------------------------|---------------------------------------------------------------------------------------------------------------------------------|---------------------------------------------------------------------------------------------------------------------------------------------------------------------------------------------------------------------------------------------------------------------------------------------------------------------------------------------------------------------------------------------------------------------------------------------------------------------------------------------------------------------------------------------------------------------------------------------------------------------------------------------------------------------------------------------------------------------------------------------------------------------------------------------------------------------------------------------------------------------------------------------------------------------------------------------------------------------------------------------------------------------------------------------------------------------------------------------------------------------------------------------------------------------------------------------------------------------------------------------------------------------------------------------------------------------------------------------------------------------------------------------------------------------------------------------------------------------------------------------------------------------------------------------------|----|----|-------------------------------------------------------------------------------------------------------------------------------------------------------------------------------------------------------------------------------------------------------------------------------------------------------------------------------------------------------------------------------------------------------------------------------------------------------------------------------------------------------------------------------------------------------------------------------------------|-------------------------------------------------------------------------------------------------------------------------------------------------------------------------------------------------------------------------------------------------------------------------------------------------------------------------------------------------------------------------------------------------------------------------------------------------------------------------------------------------------------------------------------------------------------------------------------------------------------------------------------------------------------------------------------------------------------------------------------------------------------------------------------------------------------------------------------------------------------------------------------------------------------------------------------------------------------------------------------------------------------------------------------------------------|

For peer review only

1  
2  
3  
4  
5  
6  
7  
8  
9  
10  
11  
12  
13  
14  
15  
16  
17  
18  
19  
20  
21  
22  
23  
24  
25  
26  
27  
28  
29  
30  
31  
32  
33  
34  
35  
36  
37  
38  
39  
40  
41  
42  
43  
44  
45  
46  
47

case-mix differences when comparing discharge mortality. The system was created using a combination of judgment-based and empirical methodology with a panel of pediatric cardiologists and cardiac surgeons.

1  
2  
3  
4  
5  
6  
7  
8  
9  
10  
11  
12  
13  
14  
15  
16  
17  
18  
19  
20  
21  
22  
23  
24  
25  
26  
27  
28  
29  
30  
31  
32  
33  
34  
35  
36  
37  
38  
39  
40  
41  
42  
43  
44  
45  
46  
47

For peer review only

|    |              |                                                                                                                                        |      |                                                            |                           |    |                                                                                                         |                                                          |                                                        |                                                                                                                                             |    |                                                                                                                                                                                                                                                                                                                                                                                                                          |                                                                                                                                                                                  |                                                                                                                                                                                                                          |                                                                                                                                                                                            |    |    |                                                                                                                                                                                         |                                                |    |                                     |
|----|--------------|----------------------------------------------------------------------------------------------------------------------------------------|------|------------------------------------------------------------|---------------------------|----|---------------------------------------------------------------------------------------------------------|----------------------------------------------------------|--------------------------------------------------------|---------------------------------------------------------------------------------------------------------------------------------------------|----|--------------------------------------------------------------------------------------------------------------------------------------------------------------------------------------------------------------------------------------------------------------------------------------------------------------------------------------------------------------------------------------------------------------------------|----------------------------------------------------------------------------------------------------------------------------------------------------------------------------------|--------------------------------------------------------------------------------------------------------------------------------------------------------------------------------------------------------------------------|--------------------------------------------------------------------------------------------------------------------------------------------------------------------------------------------|----|----|-----------------------------------------------------------------------------------------------------------------------------------------------------------------------------------------|------------------------------------------------|----|-------------------------------------|
| 36 | Knights J.S. | National UK audit of procedure for prolapsing haemorrhoids on behalf of the Association of Coloproctology of Great Britain and Ireland | 2008 | National UK audit of procedure for prolapsing haemorrhoids | Stapled haemorrhoidectomy | NS | Research and Audit Committee of the Association of Coloproctology of Great Britain and Ireland (ACPGBI) | To collect prospective data on stapled haemorrhoidectomy | Electronic online database through the ACPGBI website. | Electronic database and online entry process were sponsored by Ethicon Endo-Surgery, but they had no input or access to the data collected. | NS | Data were collected on the grade and symptoms of haemorrhoids, the presence of any external component, previous treatment, grade of surgeon, type of anaesthetic, height of the staple line above the dentate line, length of hospital stay, immediate complications, pain on discharge and any problems encountered at 6-week follow-up. Data were collected on the presence of symptoms of haemorrhoids according to a | Following registration on the website, the surgeon obtained a secure personalised logon through which data were entered real time at the end of the case and at 6-week follow-up | Surgeons invited to enter data on the website. Reminders sent via email and through the Association's bulletins. This audit can form the basis of a future registry. Such a registry should be compulsory to submit data | 695 patients were entered onto the database by 61 UK surgeons (2005). Only 10% of the ACPGBI members contributed data. Data represents only 20% of the potential cases conducted in the UK | NS | NS | Short follow up of 6 weeks - not long enough to detect recurrence. Only 10% of the ACPGBI members contributed data. Data represents only 20% of the potential cases conducted in the UK | Provides a good reflection of current practice | NS | Personalised login for each surgeon |
|----|--------------|----------------------------------------------------------------------------------------------------------------------------------------|------|------------------------------------------------------------|---------------------------|----|---------------------------------------------------------------------------------------------------------|----------------------------------------------------------|--------------------------------------------------------|---------------------------------------------------------------------------------------------------------------------------------------------|----|--------------------------------------------------------------------------------------------------------------------------------------------------------------------------------------------------------------------------------------------------------------------------------------------------------------------------------------------------------------------------------------------------------------------------|----------------------------------------------------------------------------------------------------------------------------------------------------------------------------------|--------------------------------------------------------------------------------------------------------------------------------------------------------------------------------------------------------------------------|--------------------------------------------------------------------------------------------------------------------------------------------------------------------------------------------|----|----|-----------------------------------------------------------------------------------------------------------------------------------------------------------------------------------------|------------------------------------------------|----|-------------------------------------|



data may not be a true reflection of the number of shoulder arthroplasties performed in Scotland. This registry employs dedicated personnel for data collection, validation and ensuring compliance from the participating surgeons

meeting being cancelled

1  
2  
3  
4  
5  
6  
7  
8  
9  
10  
11  
12  
13  
14  
15  
16  
17  
18  
19  
20  
21  
22  
23  
24  
25  
26  
27  
28  
29  
30  
31  
32  
33  
34  
35  
36  
37  
38  
39  
40  
41  
42  
43  
44  
45  
46  
47

|                                                                 |                                                                                 |          |                                     |                        |                                                                                                                                                                                                                                           |                                                                                                           |                                                                                                                                          |                                                                                                                                                                                                                       |                                                                                                                                                                                                                       |                                                                                                                                                                                                                                                                                                                                                                                                                            |                                                |                                                                                                                                                                                              |                                                                                                                                                                                                                                                                                                                                                                                    |                                                                                                                                     |                                                                                                                                                     |    |    |                                                                                                                                                                                                                                                                                                                                                                                                                                                                                                   |    |                                                                                                                                                                                                                                                                                                                                                                                                                                                                                                                                                                                                                                                                                                                                                                                                            |
|-----------------------------------------------------------------|---------------------------------------------------------------------------------|----------|-------------------------------------|------------------------|-------------------------------------------------------------------------------------------------------------------------------------------------------------------------------------------------------------------------------------------|-----------------------------------------------------------------------------------------------------------|------------------------------------------------------------------------------------------------------------------------------------------|-----------------------------------------------------------------------------------------------------------------------------------------------------------------------------------------------------------------------|-----------------------------------------------------------------------------------------------------------------------------------------------------------------------------------------------------------------------|----------------------------------------------------------------------------------------------------------------------------------------------------------------------------------------------------------------------------------------------------------------------------------------------------------------------------------------------------------------------------------------------------------------------------|------------------------------------------------|----------------------------------------------------------------------------------------------------------------------------------------------------------------------------------------------|------------------------------------------------------------------------------------------------------------------------------------------------------------------------------------------------------------------------------------------------------------------------------------------------------------------------------------------------------------------------------------|-------------------------------------------------------------------------------------------------------------------------------------|-----------------------------------------------------------------------------------------------------------------------------------------------------|----|----|---------------------------------------------------------------------------------------------------------------------------------------------------------------------------------------------------------------------------------------------------------------------------------------------------------------------------------------------------------------------------------------------------------------------------------------------------------------------------------------------------|----|------------------------------------------------------------------------------------------------------------------------------------------------------------------------------------------------------------------------------------------------------------------------------------------------------------------------------------------------------------------------------------------------------------------------------------------------------------------------------------------------------------------------------------------------------------------------------------------------------------------------------------------------------------------------------------------------------------------------------------------------------------------------------------------------------------|
| Sher J.L.<br>Reed M.R.<br>Calvert P.<br>Wallace W.A.<br>Lamb A. | Influencing the national training agenda. The UK & Ireland orthopaedic eLogbook | 200<br>5 | UK and Ireland Orthopaedic eLogbook | Orthopaedic operations | British Orthopaedic Association (BOA) Education Committee, the Specialist Advisory Committee (SAC) in Trauma and Orthopaedics, the British Orthopaedic Trainees Association (BOTA) and the Royal College of Surgeons of Edinburgh (RCSEd) | Responsibility for the project has passed to the BOA eLogbook Validation & Authorisation Committee (eVAC) | To provide data on trainees operative experience and give an insight into their training operative experience in trauma and orthopaedics | Over several years a committed group of trainees and trainers tested several versions of the logbook leading to the current product. Current software was produced by the Faculty of Health Informatics at the RCSEd. | Funds were raised from the BOA (British orthopaedic association), the Editorial Board of the Journal of Bone and Joint Surgery, the Charnley Trust, the Wishbone Trust, Smith & Nephew, Johnson & Johnson and Biomet. | After much debate, a system was devised to encompass the information needed by the United Kingdom and Irish SAC. Users can submit suggestions for unlisted procedures, which once ratified by the eVAC committee (eLogbook Validation & Authorisation Committee (eVAC), appear seamlessly as the users' 'Synchronisation' button is next pressed. The great majority of users' suggestions have been incorporated already. | Trainee level, level of involvement, operation | For data synchronisation, computers 'talk' to each other to check that their data is identical. If not, data is transferred by the main server at the Royal College of Surgeons of Edinburgh | By making the registry a 'thin' client application it means that no software has to be downloaded on to the users computer. Rather the software relies on a live internet connection. This is more advantageous when most people have internet connections. Making the logbook compatible with portable devices. It is compulsory for all specialist registrars to submit the data | Compliance is 92%. Although the database now includes over 500 000 operations, the 2004 data represents 157 492 uploaded operations | The eLogbook gives information on levels of supervision and training opportunities provided by specific trainers, hospitals and training programmes | NS | NS | The database gives information on the training opportunities available and levels of supervision. It also helps compare training posts. This helps gain an insight into the trainees experience over a given time period and compare this against the national average. Training opportunities offered by hospitals or trainers can also be compared with national figures. Such comparisons display not only total numbers of procedures but also identify unused potential learning experiences | NS | Because data which is defined as 'sensitive' or 'confidential' by the UK Data Protection Act is collected in the logbook, each user must register with the data protection authorities as a 'data controller'. The RCSEd server uses the same level of encryption security as bank web sites and the data is stored simultaneously on two servers which are regularly backed up off-site. Each user owns their data and collated information is administered by the eVAC committee. Access to the reports is restricted to defined users. Trainees have access to their own and pooled national comparative data. Training programme directors can examine a local individual's performance and individual trainers and hospitals. The SAC chairman has access to all regions and all training departments |
|-----------------------------------------------------------------|---------------------------------------------------------------------------------|----------|-------------------------------------|------------------------|-------------------------------------------------------------------------------------------------------------------------------------------------------------------------------------------------------------------------------------------|-----------------------------------------------------------------------------------------------------------|------------------------------------------------------------------------------------------------------------------------------------------|-----------------------------------------------------------------------------------------------------------------------------------------------------------------------------------------------------------------------|-----------------------------------------------------------------------------------------------------------------------------------------------------------------------------------------------------------------------|----------------------------------------------------------------------------------------------------------------------------------------------------------------------------------------------------------------------------------------------------------------------------------------------------------------------------------------------------------------------------------------------------------------------------|------------------------------------------------|----------------------------------------------------------------------------------------------------------------------------------------------------------------------------------------------|------------------------------------------------------------------------------------------------------------------------------------------------------------------------------------------------------------------------------------------------------------------------------------------------------------------------------------------------------------------------------------|-------------------------------------------------------------------------------------------------------------------------------------|-----------------------------------------------------------------------------------------------------------------------------------------------------|----|----|---------------------------------------------------------------------------------------------------------------------------------------------------------------------------------------------------------------------------------------------------------------------------------------------------------------------------------------------------------------------------------------------------------------------------------------------------------------------------------------------------|----|------------------------------------------------------------------------------------------------------------------------------------------------------------------------------------------------------------------------------------------------------------------------------------------------------------------------------------------------------------------------------------------------------------------------------------------------------------------------------------------------------------------------------------------------------------------------------------------------------------------------------------------------------------------------------------------------------------------------------------------------------------------------------------------------------------|







|                |                                               |      |                                    |                        |    |    |    |                                                                                                                       |    |                                                                                                                                                 |    |                                        |    |                                                                                                                                                                                                                                                    |                                                                                                                                                                                                                                                                     |                                                                                                                                                                          |    |                                                                                                                                                                                                                                                        |                                                                                                                                                                                                                                                                                                                             |                                                                                                                                                                                                                                                                         |                                                                                                                                                                                                                                                                                                                                                                                                                                                                                                                                                                                                                                                                                                                                                                                                                                                                                                                                                                                                                                                                                                                           |
|----------------|-----------------------------------------------|------|------------------------------------|------------------------|----|----|----|-----------------------------------------------------------------------------------------------------------------------|----|-------------------------------------------------------------------------------------------------------------------------------------------------|----|----------------------------------------|----|----------------------------------------------------------------------------------------------------------------------------------------------------------------------------------------------------------------------------------------------------|---------------------------------------------------------------------------------------------------------------------------------------------------------------------------------------------------------------------------------------------------------------------|--------------------------------------------------------------------------------------------------------------------------------------------------------------------------|----|--------------------------------------------------------------------------------------------------------------------------------------------------------------------------------------------------------------------------------------------------------|-----------------------------------------------------------------------------------------------------------------------------------------------------------------------------------------------------------------------------------------------------------------------------------------------------------------------------|-------------------------------------------------------------------------------------------------------------------------------------------------------------------------------------------------------------------------------------------------------------------------|---------------------------------------------------------------------------------------------------------------------------------------------------------------------------------------------------------------------------------------------------------------------------------------------------------------------------------------------------------------------------------------------------------------------------------------------------------------------------------------------------------------------------------------------------------------------------------------------------------------------------------------------------------------------------------------------------------------------------------------------------------------------------------------------------------------------------------------------------------------------------------------------------------------------------------------------------------------------------------------------------------------------------------------------------------------------------------------------------------------------------|
| Whitworth I.H. | The UK breast implant registry - Ten years on | 2005 | UK Breast Implant Registry (UKBIR) | Breast implant surgery | NS | NS | NS | The initial aim of the Registry was to record the use in the UK of all types of breast implant on a prospective basis | NS | MHRA. It is essential to have long-term funding as data will need to be collected for many years (lifetime expectation of implants is 37 years) | NS | Demographics, indication, implant type | NS | Directories of hospitals with theatre facilities were used to target individual units who might, or might not, be undertaking breast implant procedures. Contacts at responding centres were made, registration forms were prepared and circulated | Since 1993, the number of recorded procedures has risen steadily to reach a peak of approximately 14,000 in the year 2001. UKBIR now has some 80,000 patients registered as having undergone breast implant procedures. This involves in excess of 140,000 implants | Annual reports have been issued for each year of operation. Research projects using the data are being conducted which will help assess implant performance and lifespan | NS | In 2002 the registry started a new registration form in order to gain formal consent from patients regarding their data collection. This registration procedure has made the data collection process more complex resulting in a drop in registrations | UKBIR data can be used to audit process and can provide feedback data to individual centres for audit or information purposes. This registry can be a useful source of knowledge for tracing purposes in any advice on patient safety. The registry will help provide evaluation on breast implant performance and lifetime | The main purpose of a device registry is to describe the performance of implants in the broadest general sense, particularly assisting in the regulatory and safety aspects of implant use. Essential for registry to have good compliance amongst contributing centres | Since its foundation, the Registry has been guided by the Data Protection Act (1984, 1998), the Caldicott confidentiality principles, and guidance published by the General Medical Council (GMC). Upto 2002 there was no formal consent recorded from patients to record their data. Clinicians were asked to ensure that patients knew and agreed that registration would be made but, if a formal note was made, this was only to be found in the patient's notes. Although the Data Protection Act does not require explicit, written consent for personal data to be held, from 2002 the registry started to acquire formal consent from patients over registration and participation in research projects. Registration was with the Data Protection Registrar and confidentiality terms were defined. Individuals registered on the database have a right to all information recorded about them, but the Data Protection registration prevents disclosure of identifying information to a third party - this protects the interests of individuals registered but does allow the development of research projects |
|----------------|-----------------------------------------------|------|------------------------------------|------------------------|----|----|----|-----------------------------------------------------------------------------------------------------------------------|----|-------------------------------------------------------------------------------------------------------------------------------------------------|----|----------------------------------------|----|----------------------------------------------------------------------------------------------------------------------------------------------------------------------------------------------------------------------------------------------------|---------------------------------------------------------------------------------------------------------------------------------------------------------------------------------------------------------------------------------------------------------------------|--------------------------------------------------------------------------------------------------------------------------------------------------------------------------|----|--------------------------------------------------------------------------------------------------------------------------------------------------------------------------------------------------------------------------------------------------------|-----------------------------------------------------------------------------------------------------------------------------------------------------------------------------------------------------------------------------------------------------------------------------------------------------------------------------|-------------------------------------------------------------------------------------------------------------------------------------------------------------------------------------------------------------------------------------------------------------------------|---------------------------------------------------------------------------------------------------------------------------------------------------------------------------------------------------------------------------------------------------------------------------------------------------------------------------------------------------------------------------------------------------------------------------------------------------------------------------------------------------------------------------------------------------------------------------------------------------------------------------------------------------------------------------------------------------------------------------------------------------------------------------------------------------------------------------------------------------------------------------------------------------------------------------------------------------------------------------------------------------------------------------------------------------------------------------------------------------------------------------|

For peer review only

- 1
- 2
- 3
- 4
- 5
- 6
- 7
- 8
- 9
- 10
- 11
- 12
- 13
- 14
- 15
- 16
- 17
- 18
- 19
- 20
- 21
- 22
- 23
- 24
- 25
- 26
- 27
- 28
- 29
- 30
- 31
- 32
- 33
- 34
- 35
- 36
- 37
- 38
- 39
- 40
- 41
- 42
- 43
- 44
- 45
- 46
- 47



a reliance on the discharge process may itself be a weakness as there is an inevitable error rate within these documents. There is a risk of reporting bias and gaming when clinicians report their own outcomes - for example, adverse events become 'missing data'. To reduce this risk a possible solution is to have a unique patient identifier that follows the patient throughout the healthcare pathway so no events are missed. Data should be collected from a clearly defined point of care eg point of intervention - This single approach will help attain accurate clinical and administrative performance

1  
2  
3  
4  
5  
6  
7  
8  
9  
10  
11  
12  
13  
14  
15  
16  
17  
18  
19  
20  
21  
22  
23  
24  
25  
26  
27  
28  
29  
30  
31  
32  
33  
34  
35  
36  
37  
38  
39  
40  
41  
42  
43  
44  
45  
46  
47

For peer review only

|                      |                                                                                                                                                                                         |      |                                                                                                          |                                      |                                                                 |                                                                 |                                                                                                                                                                                                      |                                                                                                                                                                                                                                                                                   |       |                                                                                                                                                                                                                                                     |                                                                                                                                                                                     |                                                                                                                                                                                                            |                                                                                                                                                                                                 |                                                                                                                                                                                                       |                                                             |                                                                                                                                                                               |                   |                                                                                                                                                                                                                                                                                      |                                                                                                                                                                                                                                                                                                                                                                                                                                                                                                                                                                                                                                                                                                                                                                                                        |                                                                                              |    |
|----------------------|-----------------------------------------------------------------------------------------------------------------------------------------------------------------------------------------|------|----------------------------------------------------------------------------------------------------------|--------------------------------------|-----------------------------------------------------------------|-----------------------------------------------------------------|------------------------------------------------------------------------------------------------------------------------------------------------------------------------------------------------------|-----------------------------------------------------------------------------------------------------------------------------------------------------------------------------------------------------------------------------------------------------------------------------------|-------|-----------------------------------------------------------------------------------------------------------------------------------------------------------------------------------------------------------------------------------------------------|-------------------------------------------------------------------------------------------------------------------------------------------------------------------------------------|------------------------------------------------------------------------------------------------------------------------------------------------------------------------------------------------------------|-------------------------------------------------------------------------------------------------------------------------------------------------------------------------------------------------|-------------------------------------------------------------------------------------------------------------------------------------------------------------------------------------------------------|-------------------------------------------------------------|-------------------------------------------------------------------------------------------------------------------------------------------------------------------------------|-------------------|--------------------------------------------------------------------------------------------------------------------------------------------------------------------------------------------------------------------------------------------------------------------------------------|--------------------------------------------------------------------------------------------------------------------------------------------------------------------------------------------------------------------------------------------------------------------------------------------------------------------------------------------------------------------------------------------------------------------------------------------------------------------------------------------------------------------------------------------------------------------------------------------------------------------------------------------------------------------------------------------------------------------------------------------------------------------------------------------------------|----------------------------------------------------------------------------------------------|----|
| Briggs V<br>Wilkie M | Chapter 14<br>Comparative<br>audit of peritoneal<br>dialysis catheter<br>placement in<br>England,<br>Northern Ireland<br>and Wales in<br>2011: a summary<br>of progress to<br>July 2012 | 2012 | Audit of<br>Peritoneal<br>Dialysis Catheter<br>Placement in<br>England,<br>Northern Ireland<br>and Wales | PD Dialysis<br>Catheter<br>placement | York and<br>Humber Renal<br>Network and<br>UK Renal<br>Registry | York and<br>Humber Renal<br>Network and<br>UK Renal<br>Registry | The ultimate aim<br>of the project is<br>to develop an<br>effective national<br>PD access audit<br>which will identify<br>what represents<br>an 'appropriate<br>standard' of PD<br>catheter function | A 2009 Renal<br>Association<br>working party<br>recommended that<br>the UK Renal<br>Registry should<br>collect centre<br>specific<br>information on<br>various PD access<br>outcome<br>measures<br>including catheter<br>functional-<br>ity and<br>post-insertion<br>complication | HQUIP | The principal<br>data fields have<br>been refined<br>following a pilot<br>audit of six<br>centres in Y & H<br>and discussed<br>extensively<br>through the Y &<br>H PD audit group<br>and the Dialysis<br>Study Group of<br>the UK Renal<br>Registry | Demographics, date<br>of first dialysis, date<br>of surgical<br>assessment,<br>peritoneal dialysis<br>catheter insertion<br>procedure details,<br>diabetes status,<br>complications | The brief<br>permitted a<br>spreadsheet<br>based data<br>collection<br>process for the<br>first year, with<br>subsequent data<br>collection<br>through the<br>Renal Registry's<br>electronic<br>processes. | It was realised<br>that there was a<br>need to minimise<br>the data to<br>strengthen data<br>completeness<br>including clinically relevant<br>data and<br>objective<br>reproducible<br>measures | Forty three<br>data collection<br>spreadsheets<br>were returned<br>from a total of<br>63 centres<br>describing 863<br>PD catheter<br>placements of<br>which 225 had<br>a missing date<br>of insertion | Electronic<br>reports via the<br>Renal registry<br>website. | Patient and<br>public<br>partnership<br>were engaged<br>at several<br>levels<br>including as<br>part of the<br>audit steering<br>group and UK<br>Renal Registry<br>Committee. | Data completeness | NS                                                                                                                                                                                                                                                                                   | NS                                                                                                                                                                                                                                                                                                                                                                                                                                                                                                                                                                                                                                                                                                                                                                                                     | Data protection<br>and patient<br>confidentiality<br>held within the<br>UK Renal<br>Registry |    |
| Mitchell D<br>Lees T | The benefits of<br>comparative audit<br>in vascular<br>surgery.                                                                                                                         | 2011 | This is a<br>commentary on<br>the benefits of<br>comparative audit<br>in Vascular<br>Surgery             | Vascular Surgery                     | NS                                                              | NS                                                              | NS                                                                                                                                                                                                   | NS                                                                                                                                                                                                                                                                                | NS    | NS                                                                                                                                                                                                                                                  | NS                                                                                                                                                                                  | NS                                                                                                                                                                                                         | NS                                                                                                                                                                                              | NS                                                                                                                                                                                                    | NS                                                          | NS                                                                                                                                                                            | NS                | There is evidence<br>from examination of<br>national statistics that<br>registry data contains<br>bias due to under-<br>reporting of adverse<br>outcomes. The<br>majority of national<br>audits are collected by<br>clinicians on a<br>voluntary basis. This<br>lends itself to bias | The 2008<br>Vascunet<br>report showed<br>that the UK<br>was an outlier<br>with excess<br>mortality<br>(7.8%)<br>following open<br>surgical repair<br>of abdominal<br>aortic<br>aneurysm. The<br>effect was<br>immediate, with<br>expressions of<br>disbelief from<br>UK vascular<br>surgeons. This<br>was despite<br>other<br>publications<br>showing similar<br>mortality rates<br>around that<br>time. Had this<br>international<br>comparison not<br>been done the<br>UK vascular<br>surgeons may<br>well not have<br>picked up on<br>this being a<br>problem. The<br>consequence<br>of this<br>knowledge was<br>the<br>development of<br>a quality<br>improvement<br>framework<br>(QIF) by the<br>Vascular<br>Society of<br>Great Britain &<br>Ireland<br>(VSGBI) setting<br>a target to<br>reduce | NS                                                                                           | NS |

mortality to 3.5% by 2013. Since this time, mortality rates have improved. Vasconet and the Vascular Society believe that international comparative audit has been good for UK vascular surgeons. It has dispelled fixed attitudes about the quality of care we provide, and we are beginning to show improvement. This will have benefits for our patients, not just in terms of outcome, but also in the change to our processes, increasing patient communication and ensuring that patients are brought to optimal fitness prior to intervention

|                   |                                                                    |      |                                                                  |                                      |    |    |                                                                                                                                                                    |    |    |    |                                                                                                                      |                                                                                                                                               |                                                                                                                                                                   |                                                                                                           |    |    |                                                                                                                                                                                                                        |    |    |                                                |  |
|-------------------|--------------------------------------------------------------------|------|------------------------------------------------------------------|--------------------------------------|----|----|--------------------------------------------------------------------------------------------------------------------------------------------------------------------|----|----|----|----------------------------------------------------------------------------------------------------------------------|-----------------------------------------------------------------------------------------------------------------------------------------------|-------------------------------------------------------------------------------------------------------------------------------------------------------------------|-----------------------------------------------------------------------------------------------------------|----|----|------------------------------------------------------------------------------------------------------------------------------------------------------------------------------------------------------------------------|----|----|------------------------------------------------|--|
| Mason R.          | Pulmonary Langerhans' cell histiocytosis (PLCH): A new UK register | 2012 | National Pulmonary Langerhans cell histiocytosis (PLCH) Register | Management of PLCH including surgery | NS | NS | This is a research letter describing the registry. The aim of the registry was to characterise the UK population suffering from PLCH and to enable future research | NS | NS | NS | Demographics, symptoms, smoking history, lung function, surgical biopsy results, treatment including lung transplant | Demographic and clinical data were collected by post, from individual patients, their respiratory clinicians and their general practitioners. | Advertisements in the eBritish Thoracic Society (BTS) bulletin, at BTS meetings, the BTS BOLD conference and by contacting all UK interstitial lung disease leads | One hundred and six patients (17 deceased, 8 lost to follow-up) were initially identified from 53 centres | NS | NS | Patients joined the register voluntarily, potentially introducing selection and referral bias. Missing data from deceased patients or those lost to follow-up may also have introduced survivorship and selection bias | NS | NS | Consent taken from all patients that gave data |  |
| Foley N.          |                                                                    |      |                                                                  |                                      |    |    |                                                                                                                                                                    |    |    |    |                                                                                                                      |                                                                                                                                               |                                                                                                                                                                   |                                                                                                           |    |    |                                                                                                                                                                                                                        |    |    |                                                |  |
| Branley H.        |                                                                    |      |                                                                  |                                      |    |    |                                                                                                                                                                    |    |    |    |                                                                                                                      |                                                                                                                                               |                                                                                                                                                                   |                                                                                                           |    |    |                                                                                                                                                                                                                        |    |    |                                                |  |
| Maher T.          |                                                                    |      |                                                                  |                                      |    |    |                                                                                                                                                                    |    |    |    |                                                                                                                      |                                                                                                                                               |                                                                                                                                                                   |                                                                                                           |    |    |                                                                                                                                                                                                                        |    |    |                                                |  |
| Hetzel M.         |                                                                    |      |                                                                  |                                      |    |    |                                                                                                                                                                    |    |    |    |                                                                                                                      |                                                                                                                                               |                                                                                                                                                                   |                                                                                                           |    |    |                                                                                                                                                                                                                        |    |    |                                                |  |
| Adamali H.        |                                                                    |      |                                                                  |                                      |    |    |                                                                                                                                                                    |    |    |    |                                                                                                                      |                                                                                                                                               |                                                                                                                                                                   |                                                                                                           |    |    |                                                                                                                                                                                                                        |    |    |                                                |  |
| Suntharalingam J. |                                                                    |      |                                                                  |                                      |    |    |                                                                                                                                                                    |    |    |    |                                                                                                                      |                                                                                                                                               |                                                                                                                                                                   |                                                                                                           |    |    |                                                                                                                                                                                                                        |    |    |                                                |  |

45

|             |                                        |      |                                        |                |    |                    |                                                                                                                                                                                                                   |                                                                                                                                                                                                                                                                                                                                                                                                                                        |                                                                                                                                                                                                                                                                               |                                                                                                                                                                                                 |                                                                                                                                                                                               |    |                                                                                                                                                                                                                                                                                                                                                                                                                                                                                                                         |    |    |                                                                                                                                                                                                                                       |                                                                   |                                                                                                                                                                                                                                                                                                                                                                                                                                                                     |    |    |  |
|-------------|----------------------------------------|------|----------------------------------------|----------------|----|--------------------|-------------------------------------------------------------------------------------------------------------------------------------------------------------------------------------------------------------------|----------------------------------------------------------------------------------------------------------------------------------------------------------------------------------------------------------------------------------------------------------------------------------------------------------------------------------------------------------------------------------------------------------------------------------------|-------------------------------------------------------------------------------------------------------------------------------------------------------------------------------------------------------------------------------------------------------------------------------|-------------------------------------------------------------------------------------------------------------------------------------------------------------------------------------------------|-----------------------------------------------------------------------------------------------------------------------------------------------------------------------------------------------|----|-------------------------------------------------------------------------------------------------------------------------------------------------------------------------------------------------------------------------------------------------------------------------------------------------------------------------------------------------------------------------------------------------------------------------------------------------------------------------------------------------------------------------|----|----|---------------------------------------------------------------------------------------------------------------------------------------------------------------------------------------------------------------------------------------|-------------------------------------------------------------------|---------------------------------------------------------------------------------------------------------------------------------------------------------------------------------------------------------------------------------------------------------------------------------------------------------------------------------------------------------------------------------------------------------------------------------------------------------------------|----|----|--|
| Elson D.W.  | The UK Knee Osteotomy Registry (UKKOR) | 2015 | The UK Knee Osteotomy Registry (UKKOR) | Knee Osteotomy | NS | Steering committee | Aim of the registry is to improve the quality of patient care by monitoring outcomes. Specific goals: Define patient selection criteria, identify the devices and surgical techniques which give the best results | Electronic/web-based registries have a distinct advantage in terms of staffing requirements and costs of paper based registries. UKKOR has been established by surgeons, independent of government agencies. Amplitude data platform (hosted by Bluespир) has been selected. The steering group deliberately approached several industry stakeholders in order to maintain a neutral bias towards any one company or commercial party. | Funding received from five companies with a stake in osteotomy surgery. Sponsoring companies will have access to performance data on their own products but not their competitors. In addition BASK have been supportive of the project and provided a generous priming grant | The inclusion of patient reported outcome measures is vital to increase any registries' sensitivity to define success. UKKOR has chosen to follow the same model employed by the NLR committee. | Demographics, patient co-morbidities, oxford knee score (OKS), the knee injury and osteoarthritis outcome score (KOOS), EuroQol (EQOD) Activity questionnaire (OKS-APQ) from the Oxford group | NS | Clinicians can recognise that the registry will be useful as a governance instrument providing information for appraisal and revalidation. To increase compliance from both patients and clinicians, the registry has a visually appealing website which is informative and engaging with the inclusion of video explanations. All future publications drawing conclusions from UKKOR data will be authored by the "UKKOR research collaborative." Thus all surgeons who contribute patients and data will be listed as | NS | NS | Patients will be persuaded to participate because they can see their charted progress after surgery. Patients tend to have email address and phone number and this information is critical to facilitate automated patient follow-up. | Compliance from both patients and surgeons is a potential concern | Clinical registries use observational study methods from a broad population base and so their findings have strong external validity. The larger sample size from a registry database allows analysis of the multiple variables which can influence outcome. In addition, a prospective collection of complications (perceived by both patient as well as surgeon) offers transparency which should enlighten the consent process and improve patient understanding | NS | NS |  |
| Dawson M.   |                                        |      |                                        |                |    |                    |                                                                                                                                                                                                                   |                                                                                                                                                                                                                                                                                                                                                                                                                                        |                                                                                                                                                                                                                                                                               |                                                                                                                                                                                                 |                                                                                                                                                                                               |    |                                                                                                                                                                                                                                                                                                                                                                                                                                                                                                                         |    |    |                                                                                                                                                                                                                                       |                                                                   |                                                                                                                                                                                                                                                                                                                                                                                                                                                                     |    |    |  |
| Wilson C.   |                                        |      |                                        |                |    |                    |                                                                                                                                                                                                                   |                                                                                                                                                                                                                                                                                                                                                                                                                                        |                                                                                                                                                                                                                                                                               |                                                                                                                                                                                                 |                                                                                                                                                                                               |    |                                                                                                                                                                                                                                                                                                                                                                                                                                                                                                                         |    |    |                                                                                                                                                                                                                                       |                                                                   |                                                                                                                                                                                                                                                                                                                                                                                                                                                                     |    |    |  |
| Risebury M. |                                        |      |                                        |                |    |                    |                                                                                                                                                                                                                   |                                                                                                                                                                                                                                                                                                                                                                                                                                        |                                                                                                                                                                                                                                                                               |                                                                                                                                                                                                 |                                                                                                                                                                                               |    |                                                                                                                                                                                                                                                                                                                                                                                                                                                                                                                         |    |    |                                                                                                                                                                                                                                       |                                                                   |                                                                                                                                                                                                                                                                                                                                                                                                                                                                     |    |    |  |
| Wilson A.   |                                        |      |                                        |                |    |                    |                                                                                                                                                                                                                   |                                                                                                                                                                                                                                                                                                                                                                                                                                        |                                                                                                                                                                                                                                                                               |                                                                                                                                                                                                 |                                                                                                                                                                                               |    |                                                                                                                                                                                                                                                                                                                                                                                                                                                                                                                         |    |    |                                                                                                                                                                                                                                       |                                                                   |                                                                                                                                                                                                                                                                                                                                                                                                                                                                     |    |    |  |

46

1  
2  
3  
4  
5  
6  
7  
8  
9  
10  
11  
12  
13  
14  
15  
16  
17  
18  
19  
20  
21  
22  
23  
24  
25  
26  
27  
28  
29  
30  
31  
32  
33  
34  
35  
36  
37  
38  
39  
40  
41  
42  
43  
44  
45  
46  
47

|                                                                            |                                                                                                                                           |      |                                                                                                                                                             |                                                |                                                                                                                                                                     |                                                                                                                                                                                                                                                                                                                                                                                                                                                                                                                                                                                                                                                            |                                                                                                                                                                                                                                                                                                                                                                                                                                                   |                                                                                                                                                                                                                                                                                                                                                                                                                                                                                                                                                                                                                                                                                                                                                                                                                                                                                                       |                                                                                                                                                                                                                                                                                                                                                                                                                                                                                 |                                                                                                                                                             |                                                                                                                                                                                                                                                                                                                                                                                      |                                                                                                                                                                                                                                                                                                                                                                                                                                                                                                                                                                                                                                                                                                                                                                                                             |                                                                                                                                                                                                                                                                                                                                                                                                                                                                                                                                                                                                                                                                                                                                                                                                                       |                                                                                                                                                                                                                                                   |                                                                                                                                                                                                                                      |                                                                                                                                                                                                                                                                                                                                                                                                                                                                                                                                                                                                                                                                   |    |                                                                                                                                                                                                                                                                                                                                                                                                                                                                   |                                                                                                                                                                 |                                                                                                                                                                                                                                                                                                                                                                                                     |
|----------------------------------------------------------------------------|-------------------------------------------------------------------------------------------------------------------------------------------|------|-------------------------------------------------------------------------------------------------------------------------------------------------------------|------------------------------------------------|---------------------------------------------------------------------------------------------------------------------------------------------------------------------|------------------------------------------------------------------------------------------------------------------------------------------------------------------------------------------------------------------------------------------------------------------------------------------------------------------------------------------------------------------------------------------------------------------------------------------------------------------------------------------------------------------------------------------------------------------------------------------------------------------------------------------------------------|---------------------------------------------------------------------------------------------------------------------------------------------------------------------------------------------------------------------------------------------------------------------------------------------------------------------------------------------------------------------------------------------------------------------------------------------------|-------------------------------------------------------------------------------------------------------------------------------------------------------------------------------------------------------------------------------------------------------------------------------------------------------------------------------------------------------------------------------------------------------------------------------------------------------------------------------------------------------------------------------------------------------------------------------------------------------------------------------------------------------------------------------------------------------------------------------------------------------------------------------------------------------------------------------------------------------------------------------------------------------|---------------------------------------------------------------------------------------------------------------------------------------------------------------------------------------------------------------------------------------------------------------------------------------------------------------------------------------------------------------------------------------------------------------------------------------------------------------------------------|-------------------------------------------------------------------------------------------------------------------------------------------------------------|--------------------------------------------------------------------------------------------------------------------------------------------------------------------------------------------------------------------------------------------------------------------------------------------------------------------------------------------------------------------------------------|-------------------------------------------------------------------------------------------------------------------------------------------------------------------------------------------------------------------------------------------------------------------------------------------------------------------------------------------------------------------------------------------------------------------------------------------------------------------------------------------------------------------------------------------------------------------------------------------------------------------------------------------------------------------------------------------------------------------------------------------------------------------------------------------------------------|-----------------------------------------------------------------------------------------------------------------------------------------------------------------------------------------------------------------------------------------------------------------------------------------------------------------------------------------------------------------------------------------------------------------------------------------------------------------------------------------------------------------------------------------------------------------------------------------------------------------------------------------------------------------------------------------------------------------------------------------------------------------------------------------------------------------------|---------------------------------------------------------------------------------------------------------------------------------------------------------------------------------------------------------------------------------------------------|--------------------------------------------------------------------------------------------------------------------------------------------------------------------------------------------------------------------------------------|-------------------------------------------------------------------------------------------------------------------------------------------------------------------------------------------------------------------------------------------------------------------------------------------------------------------------------------------------------------------------------------------------------------------------------------------------------------------------------------------------------------------------------------------------------------------------------------------------------------------------------------------------------------------|----|-------------------------------------------------------------------------------------------------------------------------------------------------------------------------------------------------------------------------------------------------------------------------------------------------------------------------------------------------------------------------------------------------------------------------------------------------------------------|-----------------------------------------------------------------------------------------------------------------------------------------------------------------|-----------------------------------------------------------------------------------------------------------------------------------------------------------------------------------------------------------------------------------------------------------------------------------------------------------------------------------------------------------------------------------------------------|
| Van Gijn W.<br>Wouters M.W.J.M.<br>Peeters K.C.M.J.<br>Van De Velde C.J.H. | Nationwide outcome registrations to improve quality of care in rectal surgery. An initiative of the European Society of Surgical Oncology | 2009 | This papers provides an overview of a number of European audits. We have collected data on UK audit(s) only: National Bowel Cancer Audit Programme (NBOCAP) | Colorectal cancer treatment including surgery. | NS                                                                                                                                                                  | The Association of Coloproctology of Great Britain and Ireland (ACPGBI)                                                                                                                                                                                                                                                                                                                                                                                                                                                                                                                                                                                    | This paper provides an overview of the current European audit initiatives on rectal cancer and reflect on data-collection, outcome analysis and the results reported in the literature. We have collected data on UK audits only and general lessons learnt. The NBOCAP aims to improve outcomes from bowel cancer in the UK by promoting a careful and comprehensive collection of information on all patients who suffer from colorectal cancer | NS                                                                                                                                                                                                                                                                                                                                                                                                                                                                                                                                                                                                                                                                                                                                                                                                                                                                                                    | NS                                                                                                                                                                                                                                                                                                                                                                                                                                                                              | NS                                                                                                                                                          | Length of stay, mortality                                                                                                                                                                                                                                                                                                                                                            | Feedback to participating hospitals should become an important feature to improve quality of care. An important condition for the success of outcome registries is the quality of the collected data. Data have to be prospective, complete, case-mix adjusted and preferably collected by independent investigators. In addition, the quality of the data has to be assured by a second independent registry                                                                                                                                                                                                                                                                                                                                                                                               | NS                                                                                                                                                                                                                                                                                                                                                                                                                                                                                                                                                                                                                                                                                                                                                                                                                    | 17% of all Trusts in England and Wales submitted complete data in 2007. There is not yet enough coverage to allow solid feedback. However, it is enough to create risk-adjusted models required to give a fair comparative feedback in the future | Annual reports                                                                                                                                                                                                                       | NS                                                                                                                                                                                                                                                                                                                                                                                                                                                                                                                                                                                                                                                                | NS | The existence of an audit improves performance (Hawthorne effect). The feedback of reliable data on individual performance of hospitals and/or surgeons catalysts quality improvements. Apart from a professional impetus to improve quality of care, there is a public demand for health care providers to justify the costs as well as the quality of the health care they deliver - Registries help provide this information                                   | A high level of confidence in the validity of the data among the participants, is one of the most important factors determining the success of a surgical audit | NS                                                                                                                                                                                                                                                                                                                                                                                                  |
| NELA Project Team                                                          | National Emergency Laparotomy Audit (NELA) Protocol                                                                                       | 2014 | NELA. This paper discussed the protocol for NELA                                                                                                            | Emergency laparotomy                           | Royal College of Anaesthetists, the Clinical Effectiveness Unit of the Royal College of Surgeons of England and the Intensive Care National Audit & Research Centre | Royal college of anaesthetists. NELA will be delivered by a central Project Team from the National Institute of Academic Anaesthesia's Health Services Research Centre based at the RCoA. Formal oversight will be provided by a Project Board consisting of key stakeholders. Scientific input will be provided by a Clinical Reference Group consisting of representative s from all relevant clinical professional and specialty stakeholders (including patient groups). The Project Board members are the decision makers and responsible for the commitment of resources to the project, such as personnel, funding and equipment. The Project Board | To enable the improvement of the quality of care for patients undergoing emergency laparotomy through the provision of high quality comparative data from all providers of emergency laparotomy                                                                                                                                                                                                                                                   | Online Web tool. In Year 1 an Organisational Audit was performed, with individual patient data collection in Years 2 and 3. NELA data will be linked to other sources of routine data including Critical Care Data (Intensive Care National Audit and Research Centre (ICNARC) case mix programme), Bowel Cancer Data (National Bowel Cancer Audit/Upper Gastro-intestinal Cancer Audit) and Hospital Episode Statistics (mortality data). The NELA has a Clinical reference group (CRG). The CRG is made up of relevant clinical professionals and specialty stakeholders and has direct input into the design and conduct of the audit. Senior representative(s) from the CRG sit on the Project Board as Senior User(s). The CRG consists of representatives from partner organisations as well as other stakeholders including patients. The CRG acts as a boundary capacity to the Project Team. | Funding from HQIP. NELA was one of the top two national clinical audits prioritised for immediate funding, in response to HQIP's call for new national audit topic proposals in 2011. It was commissioned following evidence of a high incidence of death, and a wide variation in the provision of care and mortality, for patients undergoing emergency laparotomy in hospitals across England and Wales. Funded for 3 years with the potential of a further 2 year extension | During the course of the audit, the team will explore the potential for patient reported outcome measures to be included in the Programme when appropriate. | Patient demographics, mortality, length of stay, time of admission, type of operation, time when consultant surgeon reviewed patient, time of operation, time of antibiotics, input by consultant during the operation, seniority of individual performing operation, seniority of CT scan reporting, time to access of theatres, operative urgency, critical care admission post op | Each NELA participant taking part is given a login, which enables the user to access and contribute data. The NELA Project Team is made up of methodologists, statisticians. Quality Improvement specialists and clinical fellows who will be analysing the patient data. The data will be analysed alongside the surgical and anaesthetic standards currently in place so as to see how many of them are being met and in what percentage of participating sites. The Project Team will also be linking Year 1 data with figures from the Office of National Statistics (ONS) and Hospital Episode Statistics (HES). By doing so they will be able to examine how many patients who underwent emergency laparotomy and were included in the audit were recommended to die and how many of the patient died | Increase engagement by enabling participating sites to constantly review and analyse their hospital's results and improve the quality of patient care. Participating centres can use the web tool's export function and transfer their patient results onto an excel spreadsheet. The Project Team is in the process of developing a QI 'dashboard' for the NELA online web tool. The dashboard will feed back patient information to users in real time allowing them to examine the demographics of patients undergoing emergency laparotomy at their site while also looking at how often key targets are being met. In October 2014 the Project Team published the Organisational Audit Action Plan, a form which provides a plan to assist sites in ensuring compliance with the recommendations laid out in the | The first year of the Patient Audit saw over 20,500 patient cases entered with 100% of the 191 of the participating hospitals contributing patient data                                                                                           | Publication of reports on website - available to public. Reports sent to participating trusts chief executives shortly before publication and other stakeholders. Report findings communicated at regional and national conferences. | Patient act a stakeholders and formed part of the CRC which was tasked with audit development and running. While NELA does not require a patient's consent to be included in the audit, it is important to the Project Team that patients are aware of their inclusion in NELA and that they work closely with patient liaison groups. For this reason a patient representative is present on both the Project Board and the Clinical Reference Group and the audit's website features a page designed to educate patients on what NELA is and how the audit is being conducted. The NELA website has a section of FAC's for frequent questions asked by patients | NS | NELA enables participants to examine their hospitals' results while also seeing how they compare to the audit-wide average formed by the rest of their fellow participants. Enables secondary care providers to improve the delivery of care to patients undergoing emergency laparotomy using information produced by the audit. Facilitates the development of effective change (quality improvement) initiatives and thereby spread examples of best practice. | NS                                                                                                                                                              | Due to the fact that patient information (such as patient name, DOB, NHS number, etc.) is visible on the web tool a new user requires a trust or NHS email address in order to be registered. Additionally, the web tool has been designed so as to not allow members of the Project Team access to sensitive information when logged in, with all patient identifiable data having been anonymised |



within 30 or 60 days of their initial procedure.

NELA Organisational Report and if not, what actions need to be taken to achieve these aims

oversees strategic direction and is responsible for monitoring all aspects of delivery of the project, and is accountable to the stakeholder organisations. The Project Board meets 6-monthly and receives direct reports on the delivery of the project from members of the Project Team leaders (Chair, Clinical Lead and Methodologist) as well as minutes from the Clinical Reference Group. The Executive is ultimately accountable for the project, supported by the Senior User and Senior Supplier (HOIP) - Senior Supplier (responsible for providing the goods or services) - will be ultimately accountable for delivery of the project. The Senior User (responsible for defining what is required from the project) - commits user resources to the project. The NELA Project Team is responsible for the ongoing delivery of the Project. Project Chair - Overall responsibility for delivery of the project. Clinical Lead - Responsible for liaison with the Clinical Reference Group members, liaison with NHS emergency laparotomy network, providing clinical advice during analysis, dissemination of audit results and working on quality improvement initiatives. Project Manager - Responsible for day to day management of the project

providing speciality specific advice, and lay advice as appropriate. The CRG reviews the audit design regularly and also reviews drafts of any reports and recommendations issued. CRG consisted of: Trsu management representative, RCS, royal college of radiologists, Royal College of nursing, royal college of anaesthetists, quality observatores, patient representatives from anaesthesia, surgery and the elderly, NHS emergency laparotomy network, intensive care society, British geriatric society, ASGBI, AAGBI, association of peroperative practice, age anaesthesia association.

For peer review only

1  
2  
3  
4  
5  
6  
7  
8  
9  
10  
11  
12  
13  
14  
15  
16  
17  
18  
19  
20  
21  
22  
23  
24  
25  
26  
27  
28  
29  
30  
31  
32  
33  
34  
35  
36  
37  
38  
39  
40  
41  
42  
43  
44  
45  
46  
47

1  
2  
3  
4  
5  
6  
7  
8  
9  
10  
11  
12  
13  
14  
15  
16  
17  
18  
19  
20  
21  
22  
23  
24  
25  
26  
27  
28  
29  
30  
31  
32  
33  
34  
35  
36  
37  
38  
39  
40  
41  
42  
43  
44  
45  
46  
47

National Hip Fracture Registry 2015, annual report and NHFD Preliminary National Report 2009

NHFD Hip fractures

Royal College of Physicians (RCP), British Orthopaedic Association, British Geriatrics Society, RGS, Age UK, National Osteoporosis Society, Falls and Fractures Alliance, HQUIP

NHFD is run by an Executive representing the core clinical specialities, and also includes representation from a patient group. A larger and more broadly-based Steering Group provides advice and a smaller Implementation Group, deals with project development, data analysis, and the generation of reports. A data set subgroup is responsible for the monitoring and further development of the NHFD standard data set. The NHFD is managed by the Clinical Effectiveness and Evaluation Unit (CEEU) of the Royal College of Physicians (RCP) as part of the Falls and Fragility Fracture Audit Programme (FFFAP) alongside the Fracture Liaison Service Database (FLS-DB) and Falls Pathway workstream

To improve the delivery of care for patients having falls or sustaining fractures through effective measurement against standards and feedback to provider

The National Hip Fracture Database was set up as a collaborative venture by the British Orthopaedic Association and the British Geriatrics Society in 2007. Work towards the establishment of NHFD started in 2004, with a series of meetings by clinicians mainly from the British Orthopaedic Association and the British Geriatrics Society. These team members examined the experience of existing hip fracture audits with a view to building a preliminary national database and establishing a nationally agreed dataset. By 2007 – with the support of the NHS Information Centre, and learning from the highly successful Myocardial Infarction National Audit Project (MINAP) – NHFD was able to provide participating trauma services with a comprehensive national audit that could help them monitor and improve their care. In parallel was the development of the Blue Book - a multi-disciplinary authorship group that included anaesthetic, orthogeriatric, general practice, nursing, orthopaedic and pharmacological expertise that reviewed the current evidence on fragility fracture care and produced a concise and practical 75-page handbook. Crown Informatics is the web provider and this has enabled the development of a more interactive, user-friendly website. Website is continuously being upgraded to provide graphical 'real-time' information to support the monthly clinical governance meetings.

The development of NHFD since 2004 has depended upon the support of the British Orthopaedic Association (BOA), the British Geriatrics Society (BGS) and other relevant professional groups; and on generous funding from the Association of the British Pharmaceutical Industry (ABPI) and Association of British Healthcare Industries (ABHI), the professional bodies of the pharmaceutical and devices industries respectively. A substantial grant was obtained from the Department of Health. Total income for 2007/2008 was £519,605 with a total expenditure for the same period of £458,188. Following the set up of the registry, ongoing funding has been from HQUIP. The cost of reliable data collection is estimated at around £50-60 per case - this cost should be seen in relation to the overall cost of hip fracture care.

Many hospitals participating in the NHFD do not actively follow up their patients after discharge, so to calculate 30-day mortality NHFD relies on obtaining validated, third-party mortality data from the Office for National Statistics (ONS). They then use a casemix-adjustment model to ensure that reported mortality figures are appropriate for the demographics of the local patient population. LOS is analysed with an annualised line that smooths out seasonal variation. The registry has a Best Practice Tariff run chart that allows hospitals to see what proportion of their patients are receiving key elements of best clinical care and overall BPT attainment. The NHFD only excludes patients from analyses that prove impossible due to specific deficiencies in their dataset, but still include them in any other analyses for which relevant dataset fields are complete. Data quality issues can be addressed by well-funded data collection, and by the use of data quality checking mechanisms

Use of web-based technology facilitates information transfer, data handling, analysis and feedback, and advice and user support. Regular feedback to participating units helps maintain interest and increase participation in the registry. During the NHFD launch, advertisement via press coverage, presentations at relevant national meetings, and word of mouth ensured that the rate of participation was rapid. NHFD has since 2015's report been using colour coding and grading in their tables to allow readers to ascertain how their hospital is performing and in which quartile their practice lies when compared with national performance. Benchmarking comparisons between hospitals are difficult, as different trauma units have very differing hospitals in their catchment area. For this reason NHFD has developed a run chart that allows individual hospitals to benchmark their performance against their own previous figures, and to monitor the effectiveness of local initiatives to avoid inpatient falls.

When the registry first started, there were concerns about both the completeness and the quality of data. This has been addressed over the years of the registry and currently all 180 eligible hospitals in England, Wales and Northern Ireland are now regularly uploading data.

### BMJ Open

patient demographics, place of residence, ASA, length of stay, admission via A&E, length of NHS care following hip fracture (including care in the community), whether fracture occurred when patient was an inpatient, type of surgery, type of implant, type of fracture, re-operation, pressure ulcers, mortality, time to an orthopaedic ward, time to surgery, type of anaesthetic, complications, morbidity, perioperative medical assessment, AMTS documentation, received falls assessment, mobilised out of bed 1 day post op, received bone health assessment, whether the record has met all criteria for best practice tariff

Annual reports, research and quality improvement projects. The NHFD website provides summary data for local teams to use eg admission numbers, time to an orthopaedic ward, time to surgery, casemix, performance against NICE standards - these are set against reference lines derived from national average figures. NHFD has since 2015's report been using colour coding and grading in their tables to allow readers to ascertain how their hospital is performing and in which quartile their practice lies when compared with national performance. Benchmarking comparisons between hospitals are difficult, as different trauma units have very differing hospitals in their catchment area. For this reason NHFD has developed a run chart that allows individual hospitals to benchmark their performance against their own previous figures, and to monitor the effectiveness of local initiatives to avoid inpatient falls.

Website charts will be made to the public as part of NHFD's commitment to the transparency of audit data

Continuous and comprehensive data capture is challenging, and hard to achieve using already busy clinical staff with inevitably conflicting priorities. In particular, rigorous documentation of time of arrival and follow-up at 30 and 120 days is challenging. In 2015 there was poor reporting of pressure ulcers (4180, 2%) and no repetitions (47180, 26%), suggesting that hospitals have no mechanism to monitor these patient safety concerns. In earlier registry reports, they identified concerns about data completion and inaccuracies of data included (eg fracture type, nature of surgery, follow up. This has improved over time.

Prompt and reliable feedback to participating units is an essential feature of successful audit

BMJ Open

|    |                                                                       |                                                                                                  |      |                            |                                                                                                                                     |                                                                                                                                                                                                                                                                                                    |                                                                                                                                                                                                                                                                                         |                                                                                                                                                                                                                                                                                                                                                                 |                                                                                                                                                                                                                                                                                                                                                                                                                                                                                                                                                                                                                                                                                                                                                                                                                                                                                                                                                                                                                                                                            |                                                                                                                                                                                                                                                                                         |                                                                                                                                                                                                                                                                                                                                                           |                                                                                                                                                                                                                                                                                                                                                                                                                                                                                                                                                                                                                                                                                                                                                                                                                                                                                                                                                            |                                                                                                                                                                                                                                                                                                                                                                                                                                                                                                                                                                                                                                                                                                                                                                                                                                                                                                                                                    |                                                                                                                                                                                                                                                                                                                                                          |                                                                                                                                                                                                                                                                               |                                                                                                                                                                                                                                                                                                                                                         |                                                                                                                                                                                                                                                                                 |                                                                                                                                                                                                                                                                                                                                                                                                                                                                                                                                          |                                                                                                                                                                                                                                                                                                                 |    |                                                                                                                                                                                                                                                                                                                            |
|----|-----------------------------------------------------------------------|--------------------------------------------------------------------------------------------------|------|----------------------------|-------------------------------------------------------------------------------------------------------------------------------------|----------------------------------------------------------------------------------------------------------------------------------------------------------------------------------------------------------------------------------------------------------------------------------------------------|-----------------------------------------------------------------------------------------------------------------------------------------------------------------------------------------------------------------------------------------------------------------------------------------|-----------------------------------------------------------------------------------------------------------------------------------------------------------------------------------------------------------------------------------------------------------------------------------------------------------------------------------------------------------------|----------------------------------------------------------------------------------------------------------------------------------------------------------------------------------------------------------------------------------------------------------------------------------------------------------------------------------------------------------------------------------------------------------------------------------------------------------------------------------------------------------------------------------------------------------------------------------------------------------------------------------------------------------------------------------------------------------------------------------------------------------------------------------------------------------------------------------------------------------------------------------------------------------------------------------------------------------------------------------------------------------------------------------------------------------------------------|-----------------------------------------------------------------------------------------------------------------------------------------------------------------------------------------------------------------------------------------------------------------------------------------|-----------------------------------------------------------------------------------------------------------------------------------------------------------------------------------------------------------------------------------------------------------------------------------------------------------------------------------------------------------|------------------------------------------------------------------------------------------------------------------------------------------------------------------------------------------------------------------------------------------------------------------------------------------------------------------------------------------------------------------------------------------------------------------------------------------------------------------------------------------------------------------------------------------------------------------------------------------------------------------------------------------------------------------------------------------------------------------------------------------------------------------------------------------------------------------------------------------------------------------------------------------------------------------------------------------------------------|----------------------------------------------------------------------------------------------------------------------------------------------------------------------------------------------------------------------------------------------------------------------------------------------------------------------------------------------------------------------------------------------------------------------------------------------------------------------------------------------------------------------------------------------------------------------------------------------------------------------------------------------------------------------------------------------------------------------------------------------------------------------------------------------------------------------------------------------------------------------------------------------------------------------------------------------------|----------------------------------------------------------------------------------------------------------------------------------------------------------------------------------------------------------------------------------------------------------------------------------------------------------------------------------------------------------|-------------------------------------------------------------------------------------------------------------------------------------------------------------------------------------------------------------------------------------------------------------------------------|---------------------------------------------------------------------------------------------------------------------------------------------------------------------------------------------------------------------------------------------------------------------------------------------------------------------------------------------------------|---------------------------------------------------------------------------------------------------------------------------------------------------------------------------------------------------------------------------------------------------------------------------------|------------------------------------------------------------------------------------------------------------------------------------------------------------------------------------------------------------------------------------------------------------------------------------------------------------------------------------------------------------------------------------------------------------------------------------------------------------------------------------------------------------------------------------------|-----------------------------------------------------------------------------------------------------------------------------------------------------------------------------------------------------------------------------------------------------------------------------------------------------------------|----|----------------------------------------------------------------------------------------------------------------------------------------------------------------------------------------------------------------------------------------------------------------------------------------------------------------------------|
| 1  | Clinical Effectiveness Unit, The Royal College of Surgeons of England | National Vascular Registry; 2015 Annual report. London: The Royal College of Surgeons of England | 2015 | National vascular registry | Emergency or elective procedures for the following patient groups: Peripheral arterial disease, AAA repair, CEA or carotid stenting | National Vascular Database (NVD), the Carotid Interventions Audit, VSGBI Audit Committee                                                                                                                                                                                                           | The NVR is assisted by the Audit and Quality Improvement Committee of the Vascular Society and overseen by a Project Board, which has senior representatives from the participating organisations and the commissioning organisation                                                    | Aim of the registry : To provide comparative information on the performance of NHS vascular units and support local quality improvement as well as inform patients about major vascular interventions delivered in the NHS. Aim of the 2015 report: To give an overall picture of the care provided by NHS vascular units                                       | Web-based system. The registry was created from an amalgamation of the National Vascular Database (NVD) and the Carotid Interventions Audit. A new IT system was developed in collaboration with Northgate Information Systems in 2014. The most notable changes were to the datasets for the four procedures in the old NVD and the addition of a new dataset for lower-limb angioplasty / stent procedures. These changes were based on advice from vascular specialists on ways to simplify how data were recorded, and to ensure the datasets reflect changes in clinical practice. As a result, the NVR datasets for each procedure are now smaller and the recording of patient characteristics is more consistent across the procedures. A further improvement is that the records for patients who have one operation and later come back for another are now linked. As this is a procedure based registry, it was decided to focus mainly on outcomes rather than the process of care. The registry took on-board comments from users to develop the data items. | Funding by HQIIP as part of the National Clinical Audit Programme (NCA). HQIP holds the contract to manage and develop the NCA Programme                                                                                                                                                | Demographics, procedure, time to surgery (emergency and elective), formal anaesthetic review, fitness measurement, pre-operative imaging, whether patient discussed at MDT meeting, procedure, mortality, complications, further unplanned intervention                                                                                                   | NHS hospitals in England and Wales are required to report on their participation in the Vascular Registry as part of their Quality Account. Several online reports were introduced to support data entry. The registry team developed an online report designed to support consultant revalidation. The NVR used an IT system that has evolved following consultation with users and vascular specialists. This evolution and improvement in systems has improved data completeness. For example, some of the characteristics used for risk adjustment were typically entered for between 80-85% of patients. Variables used for risk-adjustment are now mandated which has resulted in 100% completeness for these characteristics from January 2014. When the NVR updated its dataset, following advice from vascular specialists, they were advised to simplify how data were recorded, and to ensure the datasets reflect changes in clinical practice | 2871 endovascular and 5387 bypass procedures (For peripheral disease) in the 2014 calendar year - corresponds to an estimated case-ascertainment of 15% and 90%, respectively. Likely that the cohort of patients captured by the NVR in 2014 for were less sick than all patients having a major lower limb amputation - this could explain the lower than expected mortality rate obtained by the NVR for lower limb amputation. From routine hospital data, estimated that there were approximately 2300 below knee and 2500 above knee amputations performed in UK hospitals for peripheral arterial disease during 2014 - vascular units submitted 1200 of the former and 1265 of the latter, giving an estimated case-ascertainment of approximately 50% for both procedures. There is high case-attainment for data collected by NVR for elective AAA repair and CEA. However need improvements in cas attainment for lower limb procedures | Annual reports. Reports contain options that allow the results to be tailored to the user's requirements.                                                                                                                                                                                                                                                | In some cases incomplete data on MDT assessment and date of imaging. Data submission rates for lower limb revascularisation need to improve if the NVR is going to reach its full potential in supporting us to make these improvements                                       | The data from England and Wales is particularly useful when undertaking local reviews of vascular services and commissioning groups are increasingly like to rely on this information. Helpful when comparing services nationally.                                                                                                                      |                                                                                                                                                                                                                                                                                 |                                                                                                                                                                                                                                                                                                                                                                                                                                                                                                                                          |                                                                                                                                                                                                                                                                                                                 |    |                                                                                                                                                                                                                                                                                                                            |
| 2  |                                                                       |                                                                                                  |      |                            |                                                                                                                                     |                                                                                                                                                                                                                                                                                                    |                                                                                                                                                                                                                                                                                         |                                                                                                                                                                                                                                                                                                                                                                 |                                                                                                                                                                                                                                                                                                                                                                                                                                                                                                                                                                                                                                                                                                                                                                                                                                                                                                                                                                                                                                                                            |                                                                                                                                                                                                                                                                                         |                                                                                                                                                                                                                                                                                                                                                           |                                                                                                                                                                                                                                                                                                                                                                                                                                                                                                                                                                                                                                                                                                                                                                                                                                                                                                                                                            |                                                                                                                                                                                                                                                                                                                                                                                                                                                                                                                                                                                                                                                                                                                                                                                                                                                                                                                                                    |                                                                                                                                                                                                                                                                                                                                                          |                                                                                                                                                                                                                                                                               |                                                                                                                                                                                                                                                                                                                                                         |                                                                                                                                                                                                                                                                                 |                                                                                                                                                                                                                                                                                                                                                                                                                                                                                                                                          |                                                                                                                                                                                                                                                                                                                 |    |                                                                                                                                                                                                                                                                                                                            |
| 3  |                                                                       |                                                                                                  |      |                            |                                                                                                                                     |                                                                                                                                                                                                                                                                                                    |                                                                                                                                                                                                                                                                                         |                                                                                                                                                                                                                                                                                                                                                                 |                                                                                                                                                                                                                                                                                                                                                                                                                                                                                                                                                                                                                                                                                                                                                                                                                                                                                                                                                                                                                                                                            |                                                                                                                                                                                                                                                                                         |                                                                                                                                                                                                                                                                                                                                                           |                                                                                                                                                                                                                                                                                                                                                                                                                                                                                                                                                                                                                                                                                                                                                                                                                                                                                                                                                            |                                                                                                                                                                                                                                                                                                                                                                                                                                                                                                                                                                                                                                                                                                                                                                                                                                                                                                                                                    |                                                                                                                                                                                                                                                                                                                                                          |                                                                                                                                                                                                                                                                               |                                                                                                                                                                                                                                                                                                                                                         |                                                                                                                                                                                                                                                                                 |                                                                                                                                                                                                                                                                                                                                                                                                                                                                                                                                          |                                                                                                                                                                                                                                                                                                                 |    |                                                                                                                                                                                                                                                                                                                            |
| 4  |                                                                       |                                                                                                  |      |                            |                                                                                                                                     |                                                                                                                                                                                                                                                                                                    |                                                                                                                                                                                                                                                                                         |                                                                                                                                                                                                                                                                                                                                                                 |                                                                                                                                                                                                                                                                                                                                                                                                                                                                                                                                                                                                                                                                                                                                                                                                                                                                                                                                                                                                                                                                            |                                                                                                                                                                                                                                                                                         |                                                                                                                                                                                                                                                                                                                                                           |                                                                                                                                                                                                                                                                                                                                                                                                                                                                                                                                                                                                                                                                                                                                                                                                                                                                                                                                                            |                                                                                                                                                                                                                                                                                                                                                                                                                                                                                                                                                                                                                                                                                                                                                                                                                                                                                                                                                    |                                                                                                                                                                                                                                                                                                                                                          |                                                                                                                                                                                                                                                                               |                                                                                                                                                                                                                                                                                                                                                         |                                                                                                                                                                                                                                                                                 |                                                                                                                                                                                                                                                                                                                                                                                                                                                                                                                                          |                                                                                                                                                                                                                                                                                                                 |    |                                                                                                                                                                                                                                                                                                                            |
| 5  |                                                                       |                                                                                                  |      |                            |                                                                                                                                     |                                                                                                                                                                                                                                                                                                    |                                                                                                                                                                                                                                                                                         |                                                                                                                                                                                                                                                                                                                                                                 |                                                                                                                                                                                                                                                                                                                                                                                                                                                                                                                                                                                                                                                                                                                                                                                                                                                                                                                                                                                                                                                                            |                                                                                                                                                                                                                                                                                         |                                                                                                                                                                                                                                                                                                                                                           |                                                                                                                                                                                                                                                                                                                                                                                                                                                                                                                                                                                                                                                                                                                                                                                                                                                                                                                                                            |                                                                                                                                                                                                                                                                                                                                                                                                                                                                                                                                                                                                                                                                                                                                                                                                                                                                                                                                                    |                                                                                                                                                                                                                                                                                                                                                          |                                                                                                                                                                                                                                                                               |                                                                                                                                                                                                                                                                                                                                                         |                                                                                                                                                                                                                                                                                 |                                                                                                                                                                                                                                                                                                                                                                                                                                                                                                                                          |                                                                                                                                                                                                                                                                                                                 |    |                                                                                                                                                                                                                                                                                                                            |
| 6  |                                                                       |                                                                                                  |      |                            |                                                                                                                                     |                                                                                                                                                                                                                                                                                                    |                                                                                                                                                                                                                                                                                         |                                                                                                                                                                                                                                                                                                                                                                 |                                                                                                                                                                                                                                                                                                                                                                                                                                                                                                                                                                                                                                                                                                                                                                                                                                                                                                                                                                                                                                                                            |                                                                                                                                                                                                                                                                                         |                                                                                                                                                                                                                                                                                                                                                           |                                                                                                                                                                                                                                                                                                                                                                                                                                                                                                                                                                                                                                                                                                                                                                                                                                                                                                                                                            |                                                                                                                                                                                                                                                                                                                                                                                                                                                                                                                                                                                                                                                                                                                                                                                                                                                                                                                                                    |                                                                                                                                                                                                                                                                                                                                                          |                                                                                                                                                                                                                                                                               |                                                                                                                                                                                                                                                                                                                                                         |                                                                                                                                                                                                                                                                                 |                                                                                                                                                                                                                                                                                                                                                                                                                                                                                                                                          |                                                                                                                                                                                                                                                                                                                 |    |                                                                                                                                                                                                                                                                                                                            |
| 7  |                                                                       |                                                                                                  |      |                            |                                                                                                                                     |                                                                                                                                                                                                                                                                                                    |                                                                                                                                                                                                                                                                                         |                                                                                                                                                                                                                                                                                                                                                                 |                                                                                                                                                                                                                                                                                                                                                                                                                                                                                                                                                                                                                                                                                                                                                                                                                                                                                                                                                                                                                                                                            |                                                                                                                                                                                                                                                                                         |                                                                                                                                                                                                                                                                                                                                                           |                                                                                                                                                                                                                                                                                                                                                                                                                                                                                                                                                                                                                                                                                                                                                                                                                                                                                                                                                            |                                                                                                                                                                                                                                                                                                                                                                                                                                                                                                                                                                                                                                                                                                                                                                                                                                                                                                                                                    |                                                                                                                                                                                                                                                                                                                                                          |                                                                                                                                                                                                                                                                               |                                                                                                                                                                                                                                                                                                                                                         |                                                                                                                                                                                                                                                                                 |                                                                                                                                                                                                                                                                                                                                                                                                                                                                                                                                          |                                                                                                                                                                                                                                                                                                                 |    |                                                                                                                                                                                                                                                                                                                            |
| 8  |                                                                       |                                                                                                  |      |                            |                                                                                                                                     |                                                                                                                                                                                                                                                                                                    |                                                                                                                                                                                                                                                                                         |                                                                                                                                                                                                                                                                                                                                                                 |                                                                                                                                                                                                                                                                                                                                                                                                                                                                                                                                                                                                                                                                                                                                                                                                                                                                                                                                                                                                                                                                            |                                                                                                                                                                                                                                                                                         |                                                                                                                                                                                                                                                                                                                                                           |                                                                                                                                                                                                                                                                                                                                                                                                                                                                                                                                                                                                                                                                                                                                                                                                                                                                                                                                                            |                                                                                                                                                                                                                                                                                                                                                                                                                                                                                                                                                                                                                                                                                                                                                                                                                                                                                                                                                    |                                                                                                                                                                                                                                                                                                                                                          |                                                                                                                                                                                                                                                                               |                                                                                                                                                                                                                                                                                                                                                         |                                                                                                                                                                                                                                                                                 |                                                                                                                                                                                                                                                                                                                                                                                                                                                                                                                                          |                                                                                                                                                                                                                                                                                                                 |    |                                                                                                                                                                                                                                                                                                                            |
| 9  |                                                                       |                                                                                                  |      |                            |                                                                                                                                     |                                                                                                                                                                                                                                                                                                    |                                                                                                                                                                                                                                                                                         |                                                                                                                                                                                                                                                                                                                                                                 |                                                                                                                                                                                                                                                                                                                                                                                                                                                                                                                                                                                                                                                                                                                                                                                                                                                                                                                                                                                                                                                                            |                                                                                                                                                                                                                                                                                         |                                                                                                                                                                                                                                                                                                                                                           |                                                                                                                                                                                                                                                                                                                                                                                                                                                                                                                                                                                                                                                                                                                                                                                                                                                                                                                                                            |                                                                                                                                                                                                                                                                                                                                                                                                                                                                                                                                                                                                                                                                                                                                                                                                                                                                                                                                                    |                                                                                                                                                                                                                                                                                                                                                          |                                                                                                                                                                                                                                                                               |                                                                                                                                                                                                                                                                                                                                                         |                                                                                                                                                                                                                                                                                 |                                                                                                                                                                                                                                                                                                                                                                                                                                                                                                                                          |                                                                                                                                                                                                                                                                                                                 |    |                                                                                                                                                                                                                                                                                                                            |
| 10 |                                                                       |                                                                                                  |      |                            |                                                                                                                                     |                                                                                                                                                                                                                                                                                                    |                                                                                                                                                                                                                                                                                         |                                                                                                                                                                                                                                                                                                                                                                 |                                                                                                                                                                                                                                                                                                                                                                                                                                                                                                                                                                                                                                                                                                                                                                                                                                                                                                                                                                                                                                                                            |                                                                                                                                                                                                                                                                                         |                                                                                                                                                                                                                                                                                                                                                           |                                                                                                                                                                                                                                                                                                                                                                                                                                                                                                                                                                                                                                                                                                                                                                                                                                                                                                                                                            |                                                                                                                                                                                                                                                                                                                                                                                                                                                                                                                                                                                                                                                                                                                                                                                                                                                                                                                                                    |                                                                                                                                                                                                                                                                                                                                                          |                                                                                                                                                                                                                                                                               |                                                                                                                                                                                                                                                                                                                                                         |                                                                                                                                                                                                                                                                                 |                                                                                                                                                                                                                                                                                                                                                                                                                                                                                                                                          |                                                                                                                                                                                                                                                                                                                 |    |                                                                                                                                                                                                                                                                                                                            |
| 11 |                                                                       |                                                                                                  |      |                            |                                                                                                                                     |                                                                                                                                                                                                                                                                                                    |                                                                                                                                                                                                                                                                                         |                                                                                                                                                                                                                                                                                                                                                                 |                                                                                                                                                                                                                                                                                                                                                                                                                                                                                                                                                                                                                                                                                                                                                                                                                                                                                                                                                                                                                                                                            |                                                                                                                                                                                                                                                                                         |                                                                                                                                                                                                                                                                                                                                                           |                                                                                                                                                                                                                                                                                                                                                                                                                                                                                                                                                                                                                                                                                                                                                                                                                                                                                                                                                            |                                                                                                                                                                                                                                                                                                                                                                                                                                                                                                                                                                                                                                                                                                                                                                                                                                                                                                                                                    |                                                                                                                                                                                                                                                                                                                                                          |                                                                                                                                                                                                                                                                               |                                                                                                                                                                                                                                                                                                                                                         |                                                                                                                                                                                                                                                                                 |                                                                                                                                                                                                                                                                                                                                                                                                                                                                                                                                          |                                                                                                                                                                                                                                                                                                                 |    |                                                                                                                                                                                                                                                                                                                            |
| 12 |                                                                       |                                                                                                  |      |                            |                                                                                                                                     |                                                                                                                                                                                                                                                                                                    |                                                                                                                                                                                                                                                                                         |                                                                                                                                                                                                                                                                                                                                                                 |                                                                                                                                                                                                                                                                                                                                                                                                                                                                                                                                                                                                                                                                                                                                                                                                                                                                                                                                                                                                                                                                            |                                                                                                                                                                                                                                                                                         |                                                                                                                                                                                                                                                                                                                                                           |                                                                                                                                                                                                                                                                                                                                                                                                                                                                                                                                                                                                                                                                                                                                                                                                                                                                                                                                                            |                                                                                                                                                                                                                                                                                                                                                                                                                                                                                                                                                                                                                                                                                                                                                                                                                                                                                                                                                    |                                                                                                                                                                                                                                                                                                                                                          |                                                                                                                                                                                                                                                                               |                                                                                                                                                                                                                                                                                                                                                         |                                                                                                                                                                                                                                                                                 |                                                                                                                                                                                                                                                                                                                                                                                                                                                                                                                                          |                                                                                                                                                                                                                                                                                                                 |    |                                                                                                                                                                                                                                                                                                                            |
| 13 |                                                                       |                                                                                                  |      |                            |                                                                                                                                     |                                                                                                                                                                                                                                                                                                    |                                                                                                                                                                                                                                                                                         |                                                                                                                                                                                                                                                                                                                                                                 |                                                                                                                                                                                                                                                                                                                                                                                                                                                                                                                                                                                                                                                                                                                                                                                                                                                                                                                                                                                                                                                                            |                                                                                                                                                                                                                                                                                         |                                                                                                                                                                                                                                                                                                                                                           |                                                                                                                                                                                                                                                                                                                                                                                                                                                                                                                                                                                                                                                                                                                                                                                                                                                                                                                                                            |                                                                                                                                                                                                                                                                                                                                                                                                                                                                                                                                                                                                                                                                                                                                                                                                                                                                                                                                                    |                                                                                                                                                                                                                                                                                                                                                          |                                                                                                                                                                                                                                                                               |                                                                                                                                                                                                                                                                                                                                                         |                                                                                                                                                                                                                                                                                 |                                                                                                                                                                                                                                                                                                                                                                                                                                                                                                                                          |                                                                                                                                                                                                                                                                                                                 |    |                                                                                                                                                                                                                                                                                                                            |
| 14 |                                                                       |                                                                                                  |      |                            |                                                                                                                                     |                                                                                                                                                                                                                                                                                                    |                                                                                                                                                                                                                                                                                         |                                                                                                                                                                                                                                                                                                                                                                 |                                                                                                                                                                                                                                                                                                                                                                                                                                                                                                                                                                                                                                                                                                                                                                                                                                                                                                                                                                                                                                                                            |                                                                                                                                                                                                                                                                                         |                                                                                                                                                                                                                                                                                                                                                           |                                                                                                                                                                                                                                                                                                                                                                                                                                                                                                                                                                                                                                                                                                                                                                                                                                                                                                                                                            |                                                                                                                                                                                                                                                                                                                                                                                                                                                                                                                                                                                                                                                                                                                                                                                                                                                                                                                                                    |                                                                                                                                                                                                                                                                                                                                                          |                                                                                                                                                                                                                                                                               |                                                                                                                                                                                                                                                                                                                                                         |                                                                                                                                                                                                                                                                                 |                                                                                                                                                                                                                                                                                                                                                                                                                                                                                                                                          |                                                                                                                                                                                                                                                                                                                 |    |                                                                                                                                                                                                                                                                                                                            |
| 15 |                                                                       |                                                                                                  |      |                            |                                                                                                                                     |                                                                                                                                                                                                                                                                                                    |                                                                                                                                                                                                                                                                                         |                                                                                                                                                                                                                                                                                                                                                                 |                                                                                                                                                                                                                                                                                                                                                                                                                                                                                                                                                                                                                                                                                                                                                                                                                                                                                                                                                                                                                                                                            |                                                                                                                                                                                                                                                                                         |                                                                                                                                                                                                                                                                                                                                                           |                                                                                                                                                                                                                                                                                                                                                                                                                                                                                                                                                                                                                                                                                                                                                                                                                                                                                                                                                            |                                                                                                                                                                                                                                                                                                                                                                                                                                                                                                                                                                                                                                                                                                                                                                                                                                                                                                                                                    |                                                                                                                                                                                                                                                                                                                                                          |                                                                                                                                                                                                                                                                               |                                                                                                                                                                                                                                                                                                                                                         |                                                                                                                                                                                                                                                                                 |                                                                                                                                                                                                                                                                                                                                                                                                                                                                                                                                          |                                                                                                                                                                                                                                                                                                                 |    |                                                                                                                                                                                                                                                                                                                            |
| 16 |                                                                       |                                                                                                  |      |                            |                                                                                                                                     |                                                                                                                                                                                                                                                                                                    |                                                                                                                                                                                                                                                                                         |                                                                                                                                                                                                                                                                                                                                                                 |                                                                                                                                                                                                                                                                                                                                                                                                                                                                                                                                                                                                                                                                                                                                                                                                                                                                                                                                                                                                                                                                            |                                                                                                                                                                                                                                                                                         |                                                                                                                                                                                                                                                                                                                                                           |                                                                                                                                                                                                                                                                                                                                                                                                                                                                                                                                                                                                                                                                                                                                                                                                                                                                                                                                                            |                                                                                                                                                                                                                                                                                                                                                                                                                                                                                                                                                                                                                                                                                                                                                                                                                                                                                                                                                    |                                                                                                                                                                                                                                                                                                                                                          |                                                                                                                                                                                                                                                                               |                                                                                                                                                                                                                                                                                                                                                         |                                                                                                                                                                                                                                                                                 |                                                                                                                                                                                                                                                                                                                                                                                                                                                                                                                                          |                                                                                                                                                                                                                                                                                                                 |    |                                                                                                                                                                                                                                                                                                                            |
| 17 |                                                                       |                                                                                                  |      |                            |                                                                                                                                     |                                                                                                                                                                                                                                                                                                    |                                                                                                                                                                                                                                                                                         |                                                                                                                                                                                                                                                                                                                                                                 |                                                                                                                                                                                                                                                                                                                                                                                                                                                                                                                                                                                                                                                                                                                                                                                                                                                                                                                                                                                                                                                                            |                                                                                                                                                                                                                                                                                         |                                                                                                                                                                                                                                                                                                                                                           |                                                                                                                                                                                                                                                                                                                                                                                                                                                                                                                                                                                                                                                                                                                                                                                                                                                                                                                                                            |                                                                                                                                                                                                                                                                                                                                                                                                                                                                                                                                                                                                                                                                                                                                                                                                                                                                                                                                                    |                                                                                                                                                                                                                                                                                                                                                          |                                                                                                                                                                                                                                                                               |                                                                                                                                                                                                                                                                                                                                                         |                                                                                                                                                                                                                                                                                 |                                                                                                                                                                                                                                                                                                                                                                                                                                                                                                                                          |                                                                                                                                                                                                                                                                                                                 |    |                                                                                                                                                                                                                                                                                                                            |
| 18 |                                                                       |                                                                                                  |      |                            |                                                                                                                                     |                                                                                                                                                                                                                                                                                                    |                                                                                                                                                                                                                                                                                         |                                                                                                                                                                                                                                                                                                                                                                 |                                                                                                                                                                                                                                                                                                                                                                                                                                                                                                                                                                                                                                                                                                                                                                                                                                                                                                                                                                                                                                                                            |                                                                                                                                                                                                                                                                                         |                                                                                                                                                                                                                                                                                                                                                           |                                                                                                                                                                                                                                                                                                                                                                                                                                                                                                                                                                                                                                                                                                                                                                                                                                                                                                                                                            |                                                                                                                                                                                                                                                                                                                                                                                                                                                                                                                                                                                                                                                                                                                                                                                                                                                                                                                                                    |                                                                                                                                                                                                                                                                                                                                                          |                                                                                                                                                                                                                                                                               |                                                                                                                                                                                                                                                                                                                                                         |                                                                                                                                                                                                                                                                                 |                                                                                                                                                                                                                                                                                                                                                                                                                                                                                                                                          |                                                                                                                                                                                                                                                                                                                 |    |                                                                                                                                                                                                                                                                                                                            |
| 19 |                                                                       |                                                                                                  |      |                            |                                                                                                                                     |                                                                                                                                                                                                                                                                                                    |                                                                                                                                                                                                                                                                                         |                                                                                                                                                                                                                                                                                                                                                                 |                                                                                                                                                                                                                                                                                                                                                                                                                                                                                                                                                                                                                                                                                                                                                                                                                                                                                                                                                                                                                                                                            |                                                                                                                                                                                                                                                                                         |                                                                                                                                                                                                                                                                                                                                                           |                                                                                                                                                                                                                                                                                                                                                                                                                                                                                                                                                                                                                                                                                                                                                                                                                                                                                                                                                            |                                                                                                                                                                                                                                                                                                                                                                                                                                                                                                                                                                                                                                                                                                                                                                                                                                                                                                                                                    |                                                                                                                                                                                                                                                                                                                                                          |                                                                                                                                                                                                                                                                               |                                                                                                                                                                                                                                                                                                                                                         |                                                                                                                                                                                                                                                                                 |                                                                                                                                                                                                                                                                                                                                                                                                                                                                                                                                          |                                                                                                                                                                                                                                                                                                                 |    |                                                                                                                                                                                                                                                                                                                            |
| 20 |                                                                       |                                                                                                  |      |                            |                                                                                                                                     |                                                                                                                                                                                                                                                                                                    |                                                                                                                                                                                                                                                                                         |                                                                                                                                                                                                                                                                                                                                                                 |                                                                                                                                                                                                                                                                                                                                                                                                                                                                                                                                                                                                                                                                                                                                                                                                                                                                                                                                                                                                                                                                            |                                                                                                                                                                                                                                                                                         |                                                                                                                                                                                                                                                                                                                                                           |                                                                                                                                                                                                                                                                                                                                                                                                                                                                                                                                                                                                                                                                                                                                                                                                                                                                                                                                                            |                                                                                                                                                                                                                                                                                                                                                                                                                                                                                                                                                                                                                                                                                                                                                                                                                                                                                                                                                    |                                                                                                                                                                                                                                                                                                                                                          |                                                                                                                                                                                                                                                                               |                                                                                                                                                                                                                                                                                                                                                         |                                                                                                                                                                                                                                                                                 |                                                                                                                                                                                                                                                                                                                                                                                                                                                                                                                                          |                                                                                                                                                                                                                                                                                                                 |    |                                                                                                                                                                                                                                                                                                                            |
| 21 |                                                                       |                                                                                                  |      |                            |                                                                                                                                     |                                                                                                                                                                                                                                                                                                    |                                                                                                                                                                                                                                                                                         |                                                                                                                                                                                                                                                                                                                                                                 |                                                                                                                                                                                                                                                                                                                                                                                                                                                                                                                                                                                                                                                                                                                                                                                                                                                                                                                                                                                                                                                                            |                                                                                                                                                                                                                                                                                         |                                                                                                                                                                                                                                                                                                                                                           |                                                                                                                                                                                                                                                                                                                                                                                                                                                                                                                                                                                                                                                                                                                                                                                                                                                                                                                                                            |                                                                                                                                                                                                                                                                                                                                                                                                                                                                                                                                                                                                                                                                                                                                                                                                                                                                                                                                                    |                                                                                                                                                                                                                                                                                                                                                          |                                                                                                                                                                                                                                                                               |                                                                                                                                                                                                                                                                                                                                                         |                                                                                                                                                                                                                                                                                 |                                                                                                                                                                                                                                                                                                                                                                                                                                                                                                                                          |                                                                                                                                                                                                                                                                                                                 |    |                                                                                                                                                                                                                                                                                                                            |
| 22 |                                                                       |                                                                                                  |      |                            |                                                                                                                                     |                                                                                                                                                                                                                                                                                                    |                                                                                                                                                                                                                                                                                         |                                                                                                                                                                                                                                                                                                                                                                 |                                                                                                                                                                                                                                                                                                                                                                                                                                                                                                                                                                                                                                                                                                                                                                                                                                                                                                                                                                                                                                                                            |                                                                                                                                                                                                                                                                                         |                                                                                                                                                                                                                                                                                                                                                           |                                                                                                                                                                                                                                                                                                                                                                                                                                                                                                                                                                                                                                                                                                                                                                                                                                                                                                                                                            |                                                                                                                                                                                                                                                                                                                                                                                                                                                                                                                                                                                                                                                                                                                                                                                                                                                                                                                                                    |                                                                                                                                                                                                                                                                                                                                                          |                                                                                                                                                                                                                                                                               |                                                                                                                                                                                                                                                                                                                                                         |                                                                                                                                                                                                                                                                                 |                                                                                                                                                                                                                                                                                                                                                                                                                                                                                                                                          |                                                                                                                                                                                                                                                                                                                 |    |                                                                                                                                                                                                                                                                                                                            |
| 23 |                                                                       |                                                                                                  |      |                            |                                                                                                                                     |                                                                                                                                                                                                                                                                                                    |                                                                                                                                                                                                                                                                                         |                                                                                                                                                                                                                                                                                                                                                                 |                                                                                                                                                                                                                                                                                                                                                                                                                                                                                                                                                                                                                                                                                                                                                                                                                                                                                                                                                                                                                                                                            |                                                                                                                                                                                                                                                                                         |                                                                                                                                                                                                                                                                                                                                                           |                                                                                                                                                                                                                                                                                                                                                                                                                                                                                                                                                                                                                                                                                                                                                                                                                                                                                                                                                            |                                                                                                                                                                                                                                                                                                                                                                                                                                                                                                                                                                                                                                                                                                                                                                                                                                                                                                                                                    |                                                                                                                                                                                                                                                                                                                                                          |                                                                                                                                                                                                                                                                               |                                                                                                                                                                                                                                                                                                                                                         |                                                                                                                                                                                                                                                                                 |                                                                                                                                                                                                                                                                                                                                                                                                                                                                                                                                          |                                                                                                                                                                                                                                                                                                                 |    |                                                                                                                                                                                                                                                                                                                            |
| 24 |                                                                       |                                                                                                  |      |                            |                                                                                                                                     |                                                                                                                                                                                                                                                                                                    |                                                                                                                                                                                                                                                                                         |                                                                                                                                                                                                                                                                                                                                                                 |                                                                                                                                                                                                                                                                                                                                                                                                                                                                                                                                                                                                                                                                                                                                                                                                                                                                                                                                                                                                                                                                            |                                                                                                                                                                                                                                                                                         |                                                                                                                                                                                                                                                                                                                                                           |                                                                                                                                                                                                                                                                                                                                                                                                                                                                                                                                                                                                                                                                                                                                                                                                                                                                                                                                                            |                                                                                                                                                                                                                                                                                                                                                                                                                                                                                                                                                                                                                                                                                                                                                                                                                                                                                                                                                    |                                                                                                                                                                                                                                                                                                                                                          |                                                                                                                                                                                                                                                                               |                                                                                                                                                                                                                                                                                                                                                         |                                                                                                                                                                                                                                                                                 |                                                                                                                                                                                                                                                                                                                                                                                                                                                                                                                                          |                                                                                                                                                                                                                                                                                                                 |    |                                                                                                                                                                                                                                                                                                                            |
| 25 |                                                                       |                                                                                                  |      |                            |                                                                                                                                     |                                                                                                                                                                                                                                                                                                    |                                                                                                                                                                                                                                                                                         |                                                                                                                                                                                                                                                                                                                                                                 |                                                                                                                                                                                                                                                                                                                                                                                                                                                                                                                                                                                                                                                                                                                                                                                                                                                                                                                                                                                                                                                                            |                                                                                                                                                                                                                                                                                         |                                                                                                                                                                                                                                                                                                                                                           |                                                                                                                                                                                                                                                                                                                                                                                                                                                                                                                                                                                                                                                                                                                                                                                                                                                                                                                                                            |                                                                                                                                                                                                                                                                                                                                                                                                                                                                                                                                                                                                                                                                                                                                                                                                                                                                                                                                                    |                                                                                                                                                                                                                                                                                                                                                          |                                                                                                                                                                                                                                                                               |                                                                                                                                                                                                                                                                                                                                                         |                                                                                                                                                                                                                                                                                 |                                                                                                                                                                                                                                                                                                                                                                                                                                                                                                                                          |                                                                                                                                                                                                                                                                                                                 |    |                                                                                                                                                                                                                                                                                                                            |
| 26 |                                                                       |                                                                                                  |      |                            |                                                                                                                                     |                                                                                                                                                                                                                                                                                                    |                                                                                                                                                                                                                                                                                         |                                                                                                                                                                                                                                                                                                                                                                 |                                                                                                                                                                                                                                                                                                                                                                                                                                                                                                                                                                                                                                                                                                                                                                                                                                                                                                                                                                                                                                                                            |                                                                                                                                                                                                                                                                                         |                                                                                                                                                                                                                                                                                                                                                           |                                                                                                                                                                                                                                                                                                                                                                                                                                                                                                                                                                                                                                                                                                                                                                                                                                                                                                                                                            |                                                                                                                                                                                                                                                                                                                                                                                                                                                                                                                                                                                                                                                                                                                                                                                                                                                                                                                                                    |                                                                                                                                                                                                                                                                                                                                                          |                                                                                                                                                                                                                                                                               |                                                                                                                                                                                                                                                                                                                                                         |                                                                                                                                                                                                                                                                                 |                                                                                                                                                                                                                                                                                                                                                                                                                                                                                                                                          |                                                                                                                                                                                                                                                                                                                 |    |                                                                                                                                                                                                                                                                                                                            |
| 27 |                                                                       |                                                                                                  |      |                            |                                                                                                                                     |                                                                                                                                                                                                                                                                                                    |                                                                                                                                                                                                                                                                                         |                                                                                                                                                                                                                                                                                                                                                                 |                                                                                                                                                                                                                                                                                                                                                                                                                                                                                                                                                                                                                                                                                                                                                                                                                                                                                                                                                                                                                                                                            |                                                                                                                                                                                                                                                                                         |                                                                                                                                                                                                                                                                                                                                                           |                                                                                                                                                                                                                                                                                                                                                                                                                                                                                                                                                                                                                                                                                                                                                                                                                                                                                                                                                            |                                                                                                                                                                                                                                                                                                                                                                                                                                                                                                                                                                                                                                                                                                                                                                                                                                                                                                                                                    |                                                                                                                                                                                                                                                                                                                                                          |                                                                                                                                                                                                                                                                               |                                                                                                                                                                                                                                                                                                                                                         |                                                                                                                                                                                                                                                                                 |                                                                                                                                                                                                                                                                                                                                                                                                                                                                                                                                          |                                                                                                                                                                                                                                                                                                                 |    |                                                                                                                                                                                                                                                                                                                            |
| 28 |                                                                       |                                                                                                  |      |                            |                                                                                                                                     |                                                                                                                                                                                                                                                                                                    |                                                                                                                                                                                                                                                                                         |                                                                                                                                                                                                                                                                                                                                                                 |                                                                                                                                                                                                                                                                                                                                                                                                                                                                                                                                                                                                                                                                                                                                                                                                                                                                                                                                                                                                                                                                            |                                                                                                                                                                                                                                                                                         |                                                                                                                                                                                                                                                                                                                                                           |                                                                                                                                                                                                                                                                                                                                                                                                                                                                                                                                                                                                                                                                                                                                                                                                                                                                                                                                                            |                                                                                                                                                                                                                                                                                                                                                                                                                                                                                                                                                                                                                                                                                                                                                                                                                                                                                                                                                    |                                                                                                                                                                                                                                                                                                                                                          |                                                                                                                                                                                                                                                                               |                                                                                                                                                                                                                                                                                                                                                         |                                                                                                                                                                                                                                                                                 |                                                                                                                                                                                                                                                                                                                                                                                                                                                                                                                                          |                                                                                                                                                                                                                                                                                                                 |    |                                                                                                                                                                                                                                                                                                                            |
| 29 |                                                                       |                                                                                                  |      |                            |                                                                                                                                     |                                                                                                                                                                                                                                                                                                    |                                                                                                                                                                                                                                                                                         |                                                                                                                                                                                                                                                                                                                                                                 |                                                                                                                                                                                                                                                                                                                                                                                                                                                                                                                                                                                                                                                                                                                                                                                                                                                                                                                                                                                                                                                                            |                                                                                                                                                                                                                                                                                         |                                                                                                                                                                                                                                                                                                                                                           |                                                                                                                                                                                                                                                                                                                                                                                                                                                                                                                                                                                                                                                                                                                                                                                                                                                                                                                                                            |                                                                                                                                                                                                                                                                                                                                                                                                                                                                                                                                                                                                                                                                                                                                                                                                                                                                                                                                                    |                                                                                                                                                                                                                                                                                                                                                          |                                                                                                                                                                                                                                                                               |                                                                                                                                                                                                                                                                                                                                                         |                                                                                                                                                                                                                                                                                 |                                                                                                                                                                                                                                                                                                                                                                                                                                                                                                                                          |                                                                                                                                                                                                                                                                                                                 |    |                                                                                                                                                                                                                                                                                                                            |
| 30 |                                                                       |                                                                                                  |      |                            |                                                                                                                                     |                                                                                                                                                                                                                                                                                                    |                                                                                                                                                                                                                                                                                         |                                                                                                                                                                                                                                                                                                                                                                 |                                                                                                                                                                                                                                                                                                                                                                                                                                                                                                                                                                                                                                                                                                                                                                                                                                                                                                                                                                                                                                                                            |                                                                                                                                                                                                                                                                                         |                                                                                                                                                                                                                                                                                                                                                           |                                                                                                                                                                                                                                                                                                                                                                                                                                                                                                                                                                                                                                                                                                                                                                                                                                                                                                                                                            |                                                                                                                                                                                                                                                                                                                                                                                                                                                                                                                                                                                                                                                                                                                                                                                                                                                                                                                                                    |                                                                                                                                                                                                                                                                                                                                                          |                                                                                                                                                                                                                                                                               |                                                                                                                                                                                                                                                                                                                                                         |                                                                                                                                                                                                                                                                                 |                                                                                                                                                                                                                                                                                                                                                                                                                                                                                                                                          |                                                                                                                                                                                                                                                                                                                 |    |                                                                                                                                                                                                                                                                                                                            |
| 31 |                                                                       |                                                                                                  |      |                            |                                                                                                                                     |                                                                                                                                                                                                                                                                                                    |                                                                                                                                                                                                                                                                                         |                                                                                                                                                                                                                                                                                                                                                                 |                                                                                                                                                                                                                                                                                                                                                                                                                                                                                                                                                                                                                                                                                                                                                                                                                                                                                                                                                                                                                                                                            |                                                                                                                                                                                                                                                                                         |                                                                                                                                                                                                                                                                                                                                                           |                                                                                                                                                                                                                                                                                                                                                                                                                                                                                                                                                                                                                                                                                                                                                                                                                                                                                                                                                            |                                                                                                                                                                                                                                                                                                                                                                                                                                                                                                                                                                                                                                                                                                                                                                                                                                                                                                                                                    |                                                                                                                                                                                                                                                                                                                                                          |                                                                                                                                                                                                                                                                               |                                                                                                                                                                                                                                                                                                                                                         |                                                                                                                                                                                                                                                                                 |                                                                                                                                                                                                                                                                                                                                                                                                                                                                                                                                          |                                                                                                                                                                                                                                                                                                                 |    |                                                                                                                                                                                                                                                                                                                            |
| 32 |                                                                       |                                                                                                  |      |                            |                                                                                                                                     |                                                                                                                                                                                                                                                                                                    |                                                                                                                                                                                                                                                                                         |                                                                                                                                                                                                                                                                                                                                                                 |                                                                                                                                                                                                                                                                                                                                                                                                                                                                                                                                                                                                                                                                                                                                                                                                                                                                                                                                                                                                                                                                            |                                                                                                                                                                                                                                                                                         |                                                                                                                                                                                                                                                                                                                                                           |                                                                                                                                                                                                                                                                                                                                                                                                                                                                                                                                                                                                                                                                                                                                                                                                                                                                                                                                                            |                                                                                                                                                                                                                                                                                                                                                                                                                                                                                                                                                                                                                                                                                                                                                                                                                                                                                                                                                    |                                                                                                                                                                                                                                                                                                                                                          |                                                                                                                                                                                                                                                                               |                                                                                                                                                                                                                                                                                                                                                         |                                                                                                                                                                                                                                                                                 |                                                                                                                                                                                                                                                                                                                                                                                                                                                                                                                                          |                                                                                                                                                                                                                                                                                                                 |    |                                                                                                                                                                                                                                                                                                                            |
| 33 |                                                                       |                                                                                                  |      |                            |                                                                                                                                     |                                                                                                                                                                                                                                                                                                    |                                                                                                                                                                                                                                                                                         |                                                                                                                                                                                                                                                                                                                                                                 |                                                                                                                                                                                                                                                                                                                                                                                                                                                                                                                                                                                                                                                                                                                                                                                                                                                                                                                                                                                                                                                                            |                                                                                                                                                                                                                                                                                         |                                                                                                                                                                                                                                                                                                                                                           |                                                                                                                                                                                                                                                                                                                                                                                                                                                                                                                                                                                                                                                                                                                                                                                                                                                                                                                                                            |                                                                                                                                                                                                                                                                                                                                                                                                                                                                                                                                                                                                                                                                                                                                                                                                                                                                                                                                                    |                                                                                                                                                                                                                                                                                                                                                          |                                                                                                                                                                                                                                                                               |                                                                                                                                                                                                                                                                                                                                                         |                                                                                                                                                                                                                                                                                 |                                                                                                                                                                                                                                                                                                                                                                                                                                                                                                                                          |                                                                                                                                                                                                                                                                                                                 |    |                                                                                                                                                                                                                                                                                                                            |
| 34 |                                                                       |                                                                                                  |      |                            |                                                                                                                                     |                                                                                                                                                                                                                                                                                                    |                                                                                                                                                                                                                                                                                         |                                                                                                                                                                                                                                                                                                                                                                 |                                                                                                                                                                                                                                                                                                                                                                                                                                                                                                                                                                                                                                                                                                                                                                                                                                                                                                                                                                                                                                                                            |                                                                                                                                                                                                                                                                                         |                                                                                                                                                                                                                                                                                                                                                           |                                                                                                                                                                                                                                                                                                                                                                                                                                                                                                                                                                                                                                                                                                                                                                                                                                                                                                                                                            |                                                                                                                                                                                                                                                                                                                                                                                                                                                                                                                                                                                                                                                                                                                                                                                                                                                                                                                                                    |                                                                                                                                                                                                                                                                                                                                                          |                                                                                                                                                                                                                                                                               |                                                                                                                                                                                                                                                                                                                                                         |                                                                                                                                                                                                                                                                                 |                                                                                                                                                                                                                                                                                                                                                                                                                                                                                                                                          |                                                                                                                                                                                                                                                                                                                 |    |                                                                                                                                                                                                                                                                                                                            |
| 35 |                                                                       |                                                                                                  |      |                            |                                                                                                                                     |                                                                                                                                                                                                                                                                                                    |                                                                                                                                                                                                                                                                                         |                                                                                                                                                                                                                                                                                                                                                                 |                                                                                                                                                                                                                                                                                                                                                                                                                                                                                                                                                                                                                                                                                                                                                                                                                                                                                                                                                                                                                                                                            |                                                                                                                                                                                                                                                                                         |                                                                                                                                                                                                                                                                                                                                                           |                                                                                                                                                                                                                                                                                                                                                                                                                                                                                                                                                                                                                                                                                                                                                                                                                                                                                                                                                            |                                                                                                                                                                                                                                                                                                                                                                                                                                                                                                                                                                                                                                                                                                                                                                                                                                                                                                                                                    |                                                                                                                                                                                                                                                                                                                                                          |                                                                                                                                                                                                                                                                               |                                                                                                                                                                                                                                                                                                                                                         |                                                                                                                                                                                                                                                                                 |                                                                                                                                                                                                                                                                                                                                                                                                                                                                                                                                          |                                                                                                                                                                                                                                                                                                                 |    |                                                                                                                                                                                                                                                                                                                            |
| 36 | NJR Editorial Board                                                   | NJR 12th Annual Report                                                                           | 2015 | National Joint Registry    | Hip, knee, ankle, elbow, shoulder replacement surgery                                                                               | British Orthopaedic Association (BOA), Medical Advisory Committee (through which specialist orthopaedic societies are formally represented). International Society of Arthroplasty Registers. The NJR works with many stakeholders including patients, regulators, hospitals, industry, individual | The NJR is managed by the Healthcare Quality Improvement Partnership (HQIP) under a contract with NHS England as part of the delivery of the National Clinical Audit and Patient Outcomes Programme (NCAPOP). HQIP supports the work of the NJR Steering Committee and the NJR Steering | To collect information on all hip, knee, ankle, elbow and shoulder replacement operations, to monitor the performance of joint replacement implants and the effectiveness of different types of surgery, improving clinical standards and benefiting patients, clinicians and the orthopaedic sector as a whole in England, Wales, Northern Ireland and will be | Developed by Department of Health and Welsh Government in 2002.                                                                                                                                                                                                                                                                                                                                                                                                                                                                                                                                                                                                                                                                                                                                                                                                                                                                                                                                                                                                            | The NJR is funded through a levy raised on hip, knee, ankle, elbow and shoulder procedures. Up until 31 March 2014, the NJR levy payment on hip, knee, ankle, elbow and shoulder implants was collected from purchasing hospitals by orthopaedic device manufacturers and processed the | The majority of the data can be collected via tick boxes, some information is required in white space format. In terms of collecting PROMS - There is interest in how patient reported outcomes of joint surgery change in the longer term and whether the outcomes of surgery are best evaluated at six months after surgery and again at a later point. | Patient consent, demographics, operation date, ASA grade, anaesthetic type, operation funding, consultant in charge, operating surgeon grade and name, first assistant grade, side of operation, BMI, indications, procedure, patient position, surgical approach, comorbidities, living arrangements, thromboprophylaxis regime at time of operation, untoward intraoperative events, revision cases, type of implant and                                                                                                                                                                                                                                                                                                                                                                                                                                                                                                                                 | Data input by surgeons. Data can be entered electronically directly into the NJR database. Printed forms are also available. Currently, all patients treated by or on behalf of NHS England for an elective knee and/or hip joint replacement are invited to complete a PROMS questionnaire prior to surgery and again at six months and again at a later point. Data clearing is carried out eg                                                                                                                                                                                                                                                                                                                                                                                                                                                                                                                                                   | Any provider carrying out hip, knee, ankle, elbow or shoulder surgery is now mandated to submit 100% of eligible primary and revision procedures to the NJR (including the private sector). NJR has a supporting Data Quality Strategy. This includes a programme of work in partnership with hospitals to ensure data quality compliance. The NJR helps | Compliance in data submission was 96.6%. Consent was obtained in 91.8% of cases and linkability was possible in 95.1% of cases. CNJR has a Supporting Data Quality Strategy. This outlines the registry's current and future plans for ensuring data quality. Crucially, this | Has online annual report website 'NJR reports' Digital annual reporting arrangements and new interactive clinical activity reports. Also has annual reports. There is also publication on outcomes of individual surgeons. Specific website for patients, providing information about hospital. The reporting data quality website has historical data, | Drive towards patient engagement in the registry and bringing the patient voice to the heart of NJRSC decision making. Patients will be able to see individual hospital performance and compliance in terms of submitting data through the NJR data publication and NHS Choices | Sufficient resources for the registry. 11% of records have been excluded because there were insufficient patient details to enable linkage. Cases from Northern Ireland were excluded because there was no tracing service for them. Person-level identifier was available for 96% of operations since the beginning of 2008, but in earlier years the proportion had been much lower - therefore long-term follow up data may not be as representative as short-term follow up data. In 4.4% of cases of revision surgery, there was no | The registry supports transparency by using and sharing relevant hospital, surgeon and implant-pricing data, as well as enabling the linkage of NJR data with other expanding healthcare information, and helps tackle issues and problems in joint replacement surgery. The registry helps surgeons choose the | NS | Must have patient consent prior to collection of data. Patient consent (to record their details in the NJR) was recorded as 93.8%. o avoid sending paper records through the post and to ensure maximum protection to the data, the NJR uses an electronic system for collecting the data. This includes a secure link for |
| 37 |                                                                       |                                                                                                  |      |                            |                                                                                                                                     |                                                                                                                                                                                                                                                                                                    |                                                                                                                                                                                                                                                                                         |                                                                                                                                                                                                                                                                                                                                                                 |                                                                                                                                                                                                                                                                                                                                                                                                                                                                                                                                                                                                                                                                                                                                                                                                                                                                                                                                                                                                                                                                            |                                                                                                                                                                                                                                                                                         |                                                                                                                                                                                                                                                                                                                                                           |                                                                                                                                                                                                                                                                                                                                                                                                                                                                                                                                                                                                                                                                                                                                                                                                                                                                                                                                                            |                                                                                                                                                                                                                                                                                                                                                                                                                                                                                                                                                                                                                                                                                                                                                                                                                                                                                                                                                    |                                                                                                                                                                                                                                                                                                                                                          |                                                                                                                                                                                                                                                                               |                                                                                                                                                                                                                                                                                                                                                         |                                                                                                                                                                                                                                                                                 |                                                                                                                                                                                                                                                                                                                                                                                                                                                                                                                                          |                                                                                                                                                                                                                                                                                                                 |    |                                                                                                                                                                                                                                                                                                                            |
| 38 |                                                                       |                                                                                                  |      |                            |                                                                                                                                     |                                                                                                                                                                                                                                                                                                    |                                                                                                                                                                                                                                                                                         |                                                                                                                                                                                                                                                                                                                                                                 |                                                                                                                                                                                                                                                                                                                                                                                                                                                                                                                                                                                                                                                                                                                                                                                                                                                                                                                                                                                                                                                                            |                                                                                                                                                                                                                                                                                         |                                                                                                                                                                                                                                                                                                                                                           |                                                                                                                                                                                                                                                                                                                                                                                                                                                                                                                                                                                                                                                                                                                                                                                                                                                                                                                                                            |                                                                                                                                                                                                                                                                                                                                                                                                                                                                                                                                                                                                                                                                                                                                                                                                                                                                                                                                                    |                                                                                                                                                                                                                                                                                                                                                          |                                                                                                                                                                                                                                                                               |                                                                                                                                                                                                                                                                                                                                                         |                                                                                                                                                                                                                                                                                 |                                                                                                                                                                                                                                                                                                                                                                                                                                                                                                                                          |                                                                                                                                                                                                                                                                                                                 |    |                                                                                                                                                                                                                                                                                                                            |
| 39 |                                                                       |                                                                                                  |      |                            |                                                                                                                                     |                                                                                                                                                                                                                                                                                                    |                                                                                                                                                                                                                                                                                         |                                                                                                                                                                                                                                                                                                                                                                 |                                                                                                                                                                                                                                                                                                                                                                                                                                                                                                                                                                                                                                                                                                                                                                                                                                                                                                                                                                                                                                                                            |                                                                                                                                                                                                                                                                                         |                                                                                                                                                                                                                                                                                                                                                           |                                                                                                                                                                                                                                                                                                                                                                                                                                                                                                                                                                                                                                                                                                                                                                                                                                                                                                                                                            |                                                                                                                                                                                                                                                                                                                                                                                                                                                                                                                                                                                                                                                                                                                                                                                                                                                                                                                                                    |                                                                                                                                                                                                                                                                                                                                                          |                                                                                                                                                                                                                                                                               |                                                                                                                                                                                                                                                                                                                                                         |                                                                                                                                                                                                                                                                                 |                                                                                                                                                                                                                                                                                                                                                                                                                                                                                                                                          |                                                                                                                                                                                                                                                                                                                 |    |                                                                                                                                                                                                                                                                                                                            |
| 40 |                                                                       |                                                                                                  |      |                            |                                                                                                                                     |                                                                                                                                                                                                                                                                                                    |                                                                                                                                                                                                                                                                                         |                                                                                                                                                                                                                                                                                                                                                                 |                                                                                                                                                                                                                                                                                                                                                                                                                                                                                                                                                                                                                                                                                                                                                                                                                                                                                                                                                                                                                                                                            |                                                                                                                                                                                                                                                                                         |                                                                                                                                                                                                                                                                                                                                                           |                                                                                                                                                                                                                                                                                                                                                                                                                                                                                                                                                                                                                                                                                                                                                                                                                                                                                                                                                            |                                                                                                                                                                                                                                                                                                                                                                                                                                                                                                                                                                                                                                                                                                                                                                                                                                                                                                                                                    |                                                                                                                                                                                                                                                                                                                                                          |                                                                                                                                                                                                                                                                               |                                                                                                                                                                                                                                                                                                                                                         |                                                                                                                                                                                                                                                                                 |                                                                                                                                                                                                                                                                                                                                                                                                                                                                                                                                          |                                                                                                                                                                                                                                                                                                                 |    |                                                                                                                                                                                                                                                                                                                            |
| 41 |                                                                       |                                                                                                  |      |                            |                                                                                                                                     |                                                                                                                                                                                                                                                                                                    |                                                                                                                                                                                                                                                                                         |                                                                                                                                                                                                                                                                                                                                                                 |                                                                                                                                                                                                                                                                                                                                                                                                                                                                                                                                                                                                                                                                                                                                                                                                                                                                                                                                                                                                                                                                            |                                                                                                                                                                                                                                                                                         |                                                                                                                                                                                                                                                                                                                                                           |                                                                                                                                                                                                                                                                                                                                                                                                                                                                                                                                                                                                                                                                                                                                                                                                                                                                                                                                                            |                                                                                                                                                                                                                                                                                                                                                                                                                                                                                                                                                                                                                                                                                                                                                                                                                                                                                                                                                    |                                                                                                                                                                                                                                                                                                                                                          |                                                                                                                                                                                                                                                                               |                                                                                                                                                                                                                                                                                                                                                         |                                                                                                                                                                                                                                                                                 |                                                                                                                                                                                                                                                                                                                                                                                                                                                                                                                                          |                                                                                                                                                                                                                                                                                                                 |    |                                                                                                                                                                                                                                                                                                                            |
| 42 |                                                                       |                                                                                                  |      |                            |                                                                                                                                     |                                                                                                                                                                                                                                                                                                    |                                                                                                                                                                                                                                                                                         |                                                                                                                                                                                                                                                                                                                                                                 |                                                                                                                                                                                                                                                                                                                                                                                                                                                                                                                                                                                                                                                                                                                                                                                                                                                                                                                                                                                                                                                                            |                                                                                                                                                                                                                                                                                         |                                                                                                                                                                                                                                                                                                                                                           |                                                                                                                                                                                                                                                                                                                                                                                                                                                                                                                                                                                                                                                                                                                                                                                                                                                                                                                                                            |                                                                                                                                                                                                                                                                                                                                                                                                                                                                                                                                                                                                                                                                                                                                                                                                                                                                                                                                                    |                                                                                                                                                                                                                                                                                                                                                          |                                                                                                                                                                                                                                                                               |                                                                                                                                                                                                                                                                                                                                                         |                                                                                                                                                                                                                                                                                 |                                                                                                                                                                                                                                                                                                                                                                                                                                                                                                                                          |                                                                                                                                                                                                                                                                                                                 |    |                                                                                                                                                                                                                                                                                                                            |
| 43 |                                                                       |                                                                                                  |      |                            |                                                                                                                                     |                                                                                                                                                                                                                                                                                                    |                                                                                                                                                                                                                                                                                         |                                                                                                                                                                                                                                                                                                                                                                 |                                                                                                                                                                                                                                                                                                                                                                                                                                                                                                                                                                                                                                                                                                                                                                                                                                                                                                                                                                                                                                                                            |                                                                                                                                                                                                                                                                                         |                                                                                                                                                                                                                                                                                                                                                           |                                                                                                                                                                                                                                                                                                                                                                                                                                                                                                                                                                                                                                                                                                                                                                                                                                                                                                                                                            |                                                                                                                                                                                                                                                                                                                                                                                                                                                                                                                                                                                                                                                                                                                                                                                                                                                                                                                                                    |                                                                                                                                                                                                                                                                                                                                                          |                                                                                                                                                                                                                                                                               |                                                                                                                                                                                                                                                                                                                                                         |                                                                                                                                                                                                                                                                                 |                                                                                                                                                                                                                                                                                                                                                                                                                                                                                                                                          |                                                                                                                                                                                                                                                                                                                 |    |                                                                                                                                                                                                                                                                                                                            |
| 44 |                                                                       |                                                                                                  |      |                            |                                                                                                                                     |                                                                                                                                                                                                                                                                                                    |                                                                                                                                                                                                                                                                                         |                                                                                                                                                                                                                                                                                                                                                                 |                                                                                                                                                                                                                                                                                                                                                                                                                                                                                                                                                                                                                                                                                                                                                                                                                                                                                                                                                                                                                                                                            |                                                                                                                                                                                                                                                                                         |                                                                                                                                                                                                                                                                                                                                                           |                                                                                                                                                                                                                                                                                                                                                                                                                                                                                                                                                                                                                                                                                                                                                                                                                                                                                                                                                            |                                                                                                                                                                                                                                                                                                                                                                                                                                                                                                                                                                                                                                                                                                                                                                                                                                                                                                                                                    |                                                                                                                                                                                                                                                                                                                                                          |                                                                                                                                                                                                                                                                               |                                                                                                                                                                                                                                                                                                                                                         |                                                                                                                                                                                                                                                                                 |                                                                                                                                                                                                                                                                                                                                                                                                                                                                                                                                          |                                                                                                                                                                                                                                                                                                                 |    |                                                                                                                                                                                                                                                                                                                            |
| 45 |                                                                       |                                                                                                  |      |                            |                                                                                                                                     |                                                                                                                                                                                                                                                                                                    |                                                                                                                                                                                                                                                                                         |                                                                                                                                                                                                                                                                                                                                                                 |                                                                                                                                                                                                                                                                                                                                                                                                                                                                                                                                                                                                                                                                                                                                                                                                                                                                                                                                                                                                                                                                            |                                                                                                                                                                                                                                                                                         |                                                                                                                                                                                                                                                                                                                                                           |                                                                                                                                                                                                                                                                                                                                                                                                                                                                                                                                                                                                                                                                                                                                                                                                                                                                                                                                                            |                                                                                                                                                                                                                                                                                                                                                                                                                                                                                                                                                                                                                                                                                                                                                                                                                                                                                                                                                    |                                                                                                                                                                                                                                                                                                                                                          |                                                                                                                                                                                                                                                                               |                                                                                                                                                                                                                                                                                                                                                         |                                                                                                                                                                                                                                                                                 |                                                                                                                                                                                                                                                                                                                                                                                                                                                                                                                                          |                                                                                                                                                                                                                                                                                                                 |    |                                                                                                                                                                                                                                                                                                                            |
| 46 |                                                                       |                                                                                                  |      |                            |                                                                                                                                     |                                                                                                                                                                                                                                                                                                    |                                                                                                                                                                                                                                                                                         |                                                                                                                                                                                                                                                                                                                                                                 |                                                                                                                                                                                                                                                                                                                                                                                                                                                                                                                                                                                                                                                                                                                                                                                                                                                                                                                                                                                                                                                                            |                                                                                                                                                                                                                                                                                         |                                                                                                                                                                                                                                                                                                                                                           |                                                                                                                                                                                                                                                                                                                                                                                                                                                                                                                                                                                                                                                                                                                                                                                                                                                                                                                                                            |                                                                                                                                                                                                                                                                                                                                                                                                                                                                                                                                                                                                                                                                                                                                                                                                                                                                                                                                                    |                                                                                                                                                                                                                                                                                                                                                          |                                                                                                                                                                                                                                                                               |                                                                                                                                                                                                                                                                                                                                                         |                                                                                                                                                                                                                                                                                 |                                                                                                                                                                                                                                                                                                                                                                                                                                                                                                                                          |                                                                                                                                                                                                                                                                                                                 |    |                                                                                                                                                                                                                                                                                                                            |
| 47 |                                                                       |                                                                                                  |      |                            |                                                                                                                                     |                                                                                                                                                                                                                                                                                                    |                                                                                                                                                                                                                                                                                         |                                                                                                                                                                                                                                                                                                                                                                 |                                                                                                                                                                                                                                                                                                                                                                                                                                                                                                                                                                                                                                                                                                                                                                                                                                                                                                                                                                                                                                                                            |                                                                                                                                                                                                                                                                                         |                                                                                                                                                                                                                                                                                                                                                           |                                                                                                                                                                                                                                                                                                                                                                                                                                                                                                                                                                                                                                                                                                                                                                                                                                                                                                                                                            |                                                                                                                                                                                                                                                                                                                                                                                                                                                                                                                                                                                                                                                                                                                                                                                                                                                                                                                                                    |                                                                                                                                                                                                                                                                                                                                                          |                                                                                                                                                                                                                                                                               |                                                                                                                                                                                                                                                                                                                                                         |                                                                                                                                                                                                                                                                                 |                                                                                                                                                                                                                                                                                                                                                                                                                                                                                                                                          |                                                                                                                                                                                                                                                                                                                 |    |                                                                                                                                                                                                                                                                                                                            |

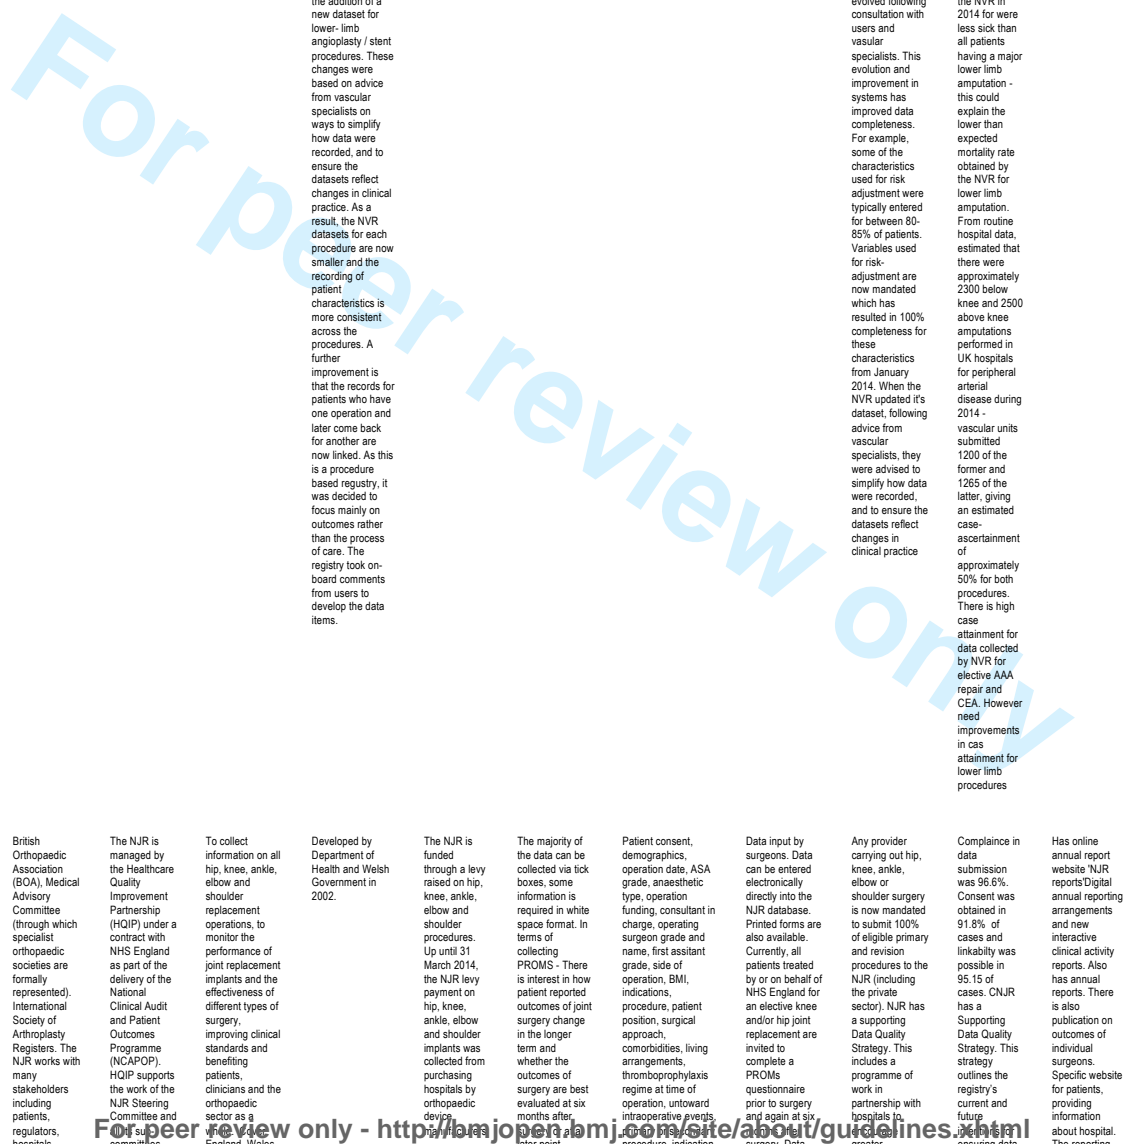

1  
2  
3  
4  
5  
6  
7  
8  
9  
10  
11  
12  
13  
14  
15  
16  
17  
18  
19  
20  
21  
22  
23  
24  
25  
26  
27  
28  
29  
30  
31  
32  
33  
34  
35  
36  
37  
38  
39  
40  
41  
42  
43  
44  
45  
46  
47

50

51



|                                                                                                                                                                                            |                                                                                                                                                                                                                                                                                                                                                                                                                                                                                                                                                                                                                                                                                                                                                                                      |                                     |                                                                                                                                                                                                                                                                                                                                                                                                                                                                                                                                                                                                                                                                                                                                                            |                                                                                                                                                                                                                                                                                   |                                                                                                                                                                                                                                                                                                                                                                                          |                                                                                                                                                                                                                                                                                                                                                                                                                                                                                                                                                                                                                                                                                                                                                                                                                                                                                                                                                                                                                                                                                                                                                            |                                                                                                                                                                                                                                                                                                                                                                                                                                                                                                                                                                                                                                                                                                                                                                                                                                                                                                                                                                                                                                                          |                                                                                                                                                                                                                                                                                                                                                                                                                                                                                  |                                                                                                                                                                                                                                                                                                                                                                                                                                                                                                                                         |                                                                                                                                                                                                                                                                                                                                                                                                                                                                                                                                                                                        |                                                                                                                                                                                                                                                                                                                                                                                                                                                                                                                                                                                                                                                                                                                                                                                                                                                                                        |
|--------------------------------------------------------------------------------------------------------------------------------------------------------------------------------------------|--------------------------------------------------------------------------------------------------------------------------------------------------------------------------------------------------------------------------------------------------------------------------------------------------------------------------------------------------------------------------------------------------------------------------------------------------------------------------------------------------------------------------------------------------------------------------------------------------------------------------------------------------------------------------------------------------------------------------------------------------------------------------------------|-------------------------------------|------------------------------------------------------------------------------------------------------------------------------------------------------------------------------------------------------------------------------------------------------------------------------------------------------------------------------------------------------------------------------------------------------------------------------------------------------------------------------------------------------------------------------------------------------------------------------------------------------------------------------------------------------------------------------------------------------------------------------------------------------------|-----------------------------------------------------------------------------------------------------------------------------------------------------------------------------------------------------------------------------------------------------------------------------------|------------------------------------------------------------------------------------------------------------------------------------------------------------------------------------------------------------------------------------------------------------------------------------------------------------------------------------------------------------------------------------------|------------------------------------------------------------------------------------------------------------------------------------------------------------------------------------------------------------------------------------------------------------------------------------------------------------------------------------------------------------------------------------------------------------------------------------------------------------------------------------------------------------------------------------------------------------------------------------------------------------------------------------------------------------------------------------------------------------------------------------------------------------------------------------------------------------------------------------------------------------------------------------------------------------------------------------------------------------------------------------------------------------------------------------------------------------------------------------------------------------------------------------------------------------|----------------------------------------------------------------------------------------------------------------------------------------------------------------------------------------------------------------------------------------------------------------------------------------------------------------------------------------------------------------------------------------------------------------------------------------------------------------------------------------------------------------------------------------------------------------------------------------------------------------------------------------------------------------------------------------------------------------------------------------------------------------------------------------------------------------------------------------------------------------------------------------------------------------------------------------------------------------------------------------------------------------------------------------------------------|----------------------------------------------------------------------------------------------------------------------------------------------------------------------------------------------------------------------------------------------------------------------------------------------------------------------------------------------------------------------------------------------------------------------------------------------------------------------------------|-----------------------------------------------------------------------------------------------------------------------------------------------------------------------------------------------------------------------------------------------------------------------------------------------------------------------------------------------------------------------------------------------------------------------------------------------------------------------------------------------------------------------------------------|----------------------------------------------------------------------------------------------------------------------------------------------------------------------------------------------------------------------------------------------------------------------------------------------------------------------------------------------------------------------------------------------------------------------------------------------------------------------------------------------------------------------------------------------------------------------------------------|----------------------------------------------------------------------------------------------------------------------------------------------------------------------------------------------------------------------------------------------------------------------------------------------------------------------------------------------------------------------------------------------------------------------------------------------------------------------------------------------------------------------------------------------------------------------------------------------------------------------------------------------------------------------------------------------------------------------------------------------------------------------------------------------------------------------------------------------------------------------------------------|
| <p>surgeons and procurement. Important to form international collaborations - to help ensure that the registry has the ability to harmonise with global orthopaedic device initiatives</p> | <p>Committee is an NHS England Committee of experts. There are industry representatives on the steering committee. The committee is responsible for overseeing the strategic direction of the NJR. Also have sub-committees, Implant Performance Sub-committee, Surgeon Outlier Sub-committee. There is also a NJR management team that supports the work of the Steering Committee. Regional clinical coordinators (RCCs) and regional coordinators (RCs) work in partnership to ensure that hospitals are supported in their understanding of the requirements of the NJR. The NJR Centre has been set up to manage the development and running of the NJR database for all data collection and to help share NJR information with clinicians, patients and other stakeholders</p> | <p>expanding to the Isle of Man</p> | <p>levy on behalf of the NJR and then made the payment to the registry. In return for their role in administering the levy, manufacturers charge a supplier administration fee which was included in the calculation of the levy. The cost per joint was £20.00 (inc administrative fee). From April 2014, the cost of the NJR levy is a new, lower rate of £15.60 per procedure where each provider organisation is issued with an annual invoice directly from the Healthcare Quality Improvement Partnership (HQIP) for an NJR subscription charge based upon the provider's prior year's procedure volume. Orthopaedic device manufacturers contributed towards the NJR Management Feedback system which supports post-market implant surveillance</p> | <p>brand, morbidity, mortality, pre and post operative PROMS (PROMS included Oxford Knee scores, EQ-5D, PROMS at 6 months post op, 1 and 3 years after their primary procedure), hospital submitting data, time to follow up, implant survivorship, white space surgeon notes</p> | <p>removing duplicates. Patient consent and a valid NHS number allows the NJR to link a patient's primary and revision operation together, giving a picture of implant survivorship by implant type and brand. Documentation of implant survivorship and mortality requires a person-level identifier to be able to relate primary and revision operations on the same individual. I</p> | <p>increase participation through a national programme of local audits to assess data completeness and quality. These audits work to identify where data might be missing to improve the general quality of their data in the registry. Those actively taking part in the audit and achieving best practice and quality will gain the new NJR Quality Data Provider certification. Renewable annually, this award is designed to recognise quality data provision and the commitment to patient safety through compliance. The certification will also highlight those hospitals who do not comply with mandatory NJR requirements, communicating this status through the NJR data publication and NHS Choices websites, thus allowing patients to be aware of hospitals that choose not to meet NJR quality standards. When organisation provide data to the NJR, the NJR shares information it has on best implant prices that can help trusts save costs - this implant price benchmarking service is called INFORM. The introduction of the Best Practice Tariff for hip replacements provides incentives for hospitals to report data to the NJR.</p> | <p>includes a programme of work in partnership with hospitals to encourage greater compliance; while data capture for the NJR is mandatory, many hospitals struggle to achieve it. The number of cases reported to the registry every year is now in excess of 200,000. 2014/15 had the highest ever annual number of submissions at 226.87. The total number of procedures recorded was 1.8 million at March 2015. Patients who had elective primary knee replacement in 2010 were asked to complete pre and postoperative PROMS - of the 32,147 invited participants, 20,721 and 17,485 respectively responded at one and three years post op. Of a total of 1,837,781 NJR records, around 11% have been lost because no suitable person-level identifier was found - in around half of these 201,548 procedures (47.3%), the patient had declined to be held, the remainder being attributable to tracing and linkage difficulties. Linkability (the ability to link a patient's primary procedure to a revision procedure) was recorded as 92.8%</p> | <p>going back to 2005 in most cases. Using the dedicated website, readers can use interactive, filterable graphs to identify the key information and trends associated with reports for hip, knee, ankle, elbow and shoulder data. Able to see data on how many hospital are participating in the NJR. Data reporting includes mortality, rates of revision, reasons for revision, survivorship analysis. The steering committee facilitate the use of NJR data for research</p> | <p>primary operation for that patient recorded in the NJR. This would have been either because the primary had taken place at an earlier point in time (before the NJR data collection period began in 2003) or was not included for other reasons such as the operation being performed outside the geographical catchment area of the NJR or consent for data linkage not being provided at the time of the primary procedure. Some revision cases were excluded because they could not be matched to primary joint replacements.</p> | <p>best implants for patients. It empowers patients by helping them find out more about the implants available. The registry improves patient safety by showing how well implants, surgeons and hospitals perform and take action where it is needed. It gives hospitals, surgeons and hospitals perform and take action where it is needed. It gives hospitals, surgeons and implant manufacturers feedback about their performance to help them improve patient care. It helps surgeons quickly decide whether patients need to return to hospital if implant problems are found</p> | <p>transferring the data from the hospital to the central database. All the data held on the central database is encrypted to provide further protection. Patients' personal data is treated as confidential at all times and cannot be used outside of the NJR. This data is only available to the patient that it relates to and their surgeon. The steering committee facilitates the use of NJR data for research. Data collected via the NJR may be used for medical research but only if it has passed ethical review and if the outcomes are expected to provide significant benefits to the healthcare of patients. However, any data provided will be anonymised so that it is not possible to identify individuals. In accordance with the Data Protection act (1998), patients can request a copy of the personal information that the NJR holds about them at any time</p> |
|--------------------------------------------------------------------------------------------------------------------------------------------------------------------------------------------|--------------------------------------------------------------------------------------------------------------------------------------------------------------------------------------------------------------------------------------------------------------------------------------------------------------------------------------------------------------------------------------------------------------------------------------------------------------------------------------------------------------------------------------------------------------------------------------------------------------------------------------------------------------------------------------------------------------------------------------------------------------------------------------|-------------------------------------|------------------------------------------------------------------------------------------------------------------------------------------------------------------------------------------------------------------------------------------------------------------------------------------------------------------------------------------------------------------------------------------------------------------------------------------------------------------------------------------------------------------------------------------------------------------------------------------------------------------------------------------------------------------------------------------------------------------------------------------------------------|-----------------------------------------------------------------------------------------------------------------------------------------------------------------------------------------------------------------------------------------------------------------------------------|------------------------------------------------------------------------------------------------------------------------------------------------------------------------------------------------------------------------------------------------------------------------------------------------------------------------------------------------------------------------------------------|------------------------------------------------------------------------------------------------------------------------------------------------------------------------------------------------------------------------------------------------------------------------------------------------------------------------------------------------------------------------------------------------------------------------------------------------------------------------------------------------------------------------------------------------------------------------------------------------------------------------------------------------------------------------------------------------------------------------------------------------------------------------------------------------------------------------------------------------------------------------------------------------------------------------------------------------------------------------------------------------------------------------------------------------------------------------------------------------------------------------------------------------------------|----------------------------------------------------------------------------------------------------------------------------------------------------------------------------------------------------------------------------------------------------------------------------------------------------------------------------------------------------------------------------------------------------------------------------------------------------------------------------------------------------------------------------------------------------------------------------------------------------------------------------------------------------------------------------------------------------------------------------------------------------------------------------------------------------------------------------------------------------------------------------------------------------------------------------------------------------------------------------------------------------------------------------------------------------------|----------------------------------------------------------------------------------------------------------------------------------------------------------------------------------------------------------------------------------------------------------------------------------------------------------------------------------------------------------------------------------------------------------------------------------------------------------------------------------|-----------------------------------------------------------------------------------------------------------------------------------------------------------------------------------------------------------------------------------------------------------------------------------------------------------------------------------------------------------------------------------------------------------------------------------------------------------------------------------------------------------------------------------------|----------------------------------------------------------------------------------------------------------------------------------------------------------------------------------------------------------------------------------------------------------------------------------------------------------------------------------------------------------------------------------------------------------------------------------------------------------------------------------------------------------------------------------------------------------------------------------------|----------------------------------------------------------------------------------------------------------------------------------------------------------------------------------------------------------------------------------------------------------------------------------------------------------------------------------------------------------------------------------------------------------------------------------------------------------------------------------------------------------------------------------------------------------------------------------------------------------------------------------------------------------------------------------------------------------------------------------------------------------------------------------------------------------------------------------------------------------------------------------------|

|                                                     |                                                                                            |             |                                                              |                          |                                             |                                               |                                             |                                                                                                                     |                                                                                                                 |                                                                                                                                                                                                                                                                                                                                                                                                                                                                                                                                                                                                                                    |                                                                       |                                                                                                                                                                                                                                                                                                                                                                                                                                                                                                                                                                                                                                                                                                                                                                                                                                                                                                                                                               |                                                                                                                                                                                                                                                                                                                                                                                                                                                                                                                                                                                                                                                                                                                                                                                                                                                                                                       |                                                                                                                                                                                                                                                                           |           |                                                                                                                                                                                                                                                                                                                                                                                                                                                                                                                                                                                                                                                                                                                                                                                                                                                                                         |                                                                                          |                                                                             |                                                                                                                                                                                                                                       |
|-----------------------------------------------------|--------------------------------------------------------------------------------------------|-------------|--------------------------------------------------------------|--------------------------|---------------------------------------------|-----------------------------------------------|---------------------------------------------|---------------------------------------------------------------------------------------------------------------------|-----------------------------------------------------------------------------------------------------------------|------------------------------------------------------------------------------------------------------------------------------------------------------------------------------------------------------------------------------------------------------------------------------------------------------------------------------------------------------------------------------------------------------------------------------------------------------------------------------------------------------------------------------------------------------------------------------------------------------------------------------------|-----------------------------------------------------------------------|---------------------------------------------------------------------------------------------------------------------------------------------------------------------------------------------------------------------------------------------------------------------------------------------------------------------------------------------------------------------------------------------------------------------------------------------------------------------------------------------------------------------------------------------------------------------------------------------------------------------------------------------------------------------------------------------------------------------------------------------------------------------------------------------------------------------------------------------------------------------------------------------------------------------------------------------------------------|-------------------------------------------------------------------------------------------------------------------------------------------------------------------------------------------------------------------------------------------------------------------------------------------------------------------------------------------------------------------------------------------------------------------------------------------------------------------------------------------------------------------------------------------------------------------------------------------------------------------------------------------------------------------------------------------------------------------------------------------------------------------------------------------------------------------------------------------------------------------------------------------------------|---------------------------------------------------------------------------------------------------------------------------------------------------------------------------------------------------------------------------------------------------------------------------|-----------|-----------------------------------------------------------------------------------------------------------------------------------------------------------------------------------------------------------------------------------------------------------------------------------------------------------------------------------------------------------------------------------------------------------------------------------------------------------------------------------------------------------------------------------------------------------------------------------------------------------------------------------------------------------------------------------------------------------------------------------------------------------------------------------------------------------------------------------------------------------------------------------------|------------------------------------------------------------------------------------------|-----------------------------------------------------------------------------|---------------------------------------------------------------------------------------------------------------------------------------------------------------------------------------------------------------------------------------|
| <p>David Chadwick, Robert Kinsman, Peter Walton</p> | <p>The British Association of Endocrine and Thyroid Surgeons 4th National Audit Report</p> | <p>2012</p> | <p>UK Registry of Endocrine and Thyroid Surgery (UKRETS)</p> | <p>Endocrine Surgery</p> | <p>National Cancer Intelligence Network</p> | <p>BAETS and Dendrite manage the registry</p> | <p>To ensure high quality surgical care</p> | <p>Dendrite build, maintain and host the registry. They also provide the data analysis and publish the reports.</p> | <p>Sponsorship by Covidien since 2011 and ongoing. Ethicon Endo-Surgery provided the initial start up funds</p> | <p>Demographics, indication for surgery, diagnoses, site of lesion (left/right), date of operation, histology, use of fine needle aspiration, length of stay, complications, imaging, use of nerve monitor, use of harmonic scalpel, use of ligasure, pre-operative imaging, use of MDT, use of laryngoscopy, grade of surgeon, grade of assistant, consultant involvement, post operative vocal cord assessment, procedure information, type of approach (posterior, endoscopic, open, transperitoneal etc), energy source (bi/monopolar), re-operation, only patient comments and surgeon comments are in white space format</p> | <p>Electronic data collection. Dendrite involved in data analysis</p> | <p>Participating in the UKRETS is an obligatory requirement for BAETS Full Members. It is a requirement of HQIP that all thyroid operations are entered onto UKRETS as thyroid surgery has been chosen by the Chief Medical Officer to be one of 13 specialities where consultant level outcomes should be openly available for public viewing. The registry facilitates appraisal and revalidation process. Surgeons get personal results. Having mandatory fields will make it impossible to log off without completion. Making data submission compulsory for membership will also increase data completion. Other methods to improve data entry include: publishing of members' rates of complete data; identification of those high-volume surgeons with high rates of complete data, with a view to sharing their methodology for successful and comprehensive data acquisition; prevent cases being logged until certain basic fields are complete</p> | <p>The report has outcomes of 29,000 surgical procedures. There was enormous variation between individual surgeons with respect to their rate of missing data. Some achieved well above average rates of data completeness, some at or close to 100% complete. Others, however, have high rates of incomplete entries, occasionally close to zero percent. The variation did not appear to be due to surgeon-volume, with many of the highest volume surgeons represented amongst the enthusiasts, despite the larger number of cases requiring data entry. Audit fatigue over time also does not appear to explain this divergence, as rates of incomplete data entry are stable over the last 5-6 years. However, data entry for outcomes at follow-up is less complete than for outcomes at discharge, reflecting the increased effort required to obtain these data and update the case entry</p> | <p>The results from the registry are published openly via the Surgeon Specific Outcomes Report for Endocrine Surgery. Access to data for research requires a formal application and peer review process. Dendrite are involved in publishing the registry the reports</p> | <p>NS</p> | <p>It is a purely a surgical database, so that data on for instance adjuvant therapies for thyroid cancer or for tumours not undergoing surgery are not collected. The majority of thyroidectomies in the United Kingdom are performed by non-BAETS members, and therefore are not recorded in our audit. There is considerable variation between members in completeness of data entry - this variation, and the level of missing data overall, has the potential to compromise assessment of surgical outcomes. There was considerable missing data for all endocrine case types. For thyroidectomy for examples, even the most basic data that would allow simple calculation of complication rates were missing in over 10% of cases on average. Other data fields have even higher proportions of incomplete data entry. This is similar to parathyroid and adrenal data entry</p> | <p>Facilitate appraisal and revalidation process, surgeons will get personal results</p> | <p>Success of the registry is dependent on it's members to submit data.</p> | <p>Access to UKRETS is granted on Full Membership of BAETS. Surgeons can then access the registry to enter details of all endocrine operations. Access to data for research requires a formal application and peer review process</p> |
|-----------------------------------------------------|--------------------------------------------------------------------------------------------|-------------|--------------------------------------------------------------|--------------------------|---------------------------------------------|-----------------------------------------------|---------------------------------------------|---------------------------------------------------------------------------------------------------------------------|-----------------------------------------------------------------------------------------------------------------|------------------------------------------------------------------------------------------------------------------------------------------------------------------------------------------------------------------------------------------------------------------------------------------------------------------------------------------------------------------------------------------------------------------------------------------------------------------------------------------------------------------------------------------------------------------------------------------------------------------------------------|-----------------------------------------------------------------------|---------------------------------------------------------------------------------------------------------------------------------------------------------------------------------------------------------------------------------------------------------------------------------------------------------------------------------------------------------------------------------------------------------------------------------------------------------------------------------------------------------------------------------------------------------------------------------------------------------------------------------------------------------------------------------------------------------------------------------------------------------------------------------------------------------------------------------------------------------------------------------------------------------------------------------------------------------------|-------------------------------------------------------------------------------------------------------------------------------------------------------------------------------------------------------------------------------------------------------------------------------------------------------------------------------------------------------------------------------------------------------------------------------------------------------------------------------------------------------------------------------------------------------------------------------------------------------------------------------------------------------------------------------------------------------------------------------------------------------------------------------------------------------------------------------------------------------------------------------------------------------|---------------------------------------------------------------------------------------------------------------------------------------------------------------------------------------------------------------------------------------------------------------------------|-----------|-----------------------------------------------------------------------------------------------------------------------------------------------------------------------------------------------------------------------------------------------------------------------------------------------------------------------------------------------------------------------------------------------------------------------------------------------------------------------------------------------------------------------------------------------------------------------------------------------------------------------------------------------------------------------------------------------------------------------------------------------------------------------------------------------------------------------------------------------------------------------------------------|------------------------------------------------------------------------------------------|-----------------------------------------------------------------------------|---------------------------------------------------------------------------------------------------------------------------------------------------------------------------------------------------------------------------------------|

For peer review only

1  
2  
3  
4  
5  
6  
7  
8  
9  
10  
11  
12  
13  
14  
15  
16  
17  
18  
19  
20  
21  
22  
23  
24  
25  
26  
27  
28  
29  
30  
31  
32  
33  
34  
35  
36  
37  
38  
39  
40  
41  
42  
43  
44  
45  
46  
47

1  
2  
3  
4  
5  
6  
7  
8  
9  
10  
11  
12  
13  
14  
15  
16  
17  
18  
19  
20  
21  
22  
23  
24  
25  
26  
27  
28  
29  
30  
31  
32  
33  
34  
35  
36  
37  
38  
39  
40  
41  
42  
43  
44  
45  
46  
47

|                                                 |                                                                      |             |                                                                             |                                                 |                                                                                                                                                          |                                                                                                                                                                                                                                                                                                                                                                                                                                                                                                                     |                                                                                                                                                                                                                                                                                                                                                                                                                                                              |           |                                                                                                           |                 |                                                                                                                                                                                                                                                                                                                                                                                                                     |                                                                                                                                                                                                                                                                                                                                                                                                                                                                                                                                                                                                                                                                                                |                                                                                                                                                              |                                                                                                                            |                                                                                                                                                                                                                                                                                                                                                                                                                                                                                                                                                     |           |           |                                                                                                                                                                              |                                                                                                                                        |
|-------------------------------------------------|----------------------------------------------------------------------|-------------|-----------------------------------------------------------------------------|-------------------------------------------------|----------------------------------------------------------------------------------------------------------------------------------------------------------|---------------------------------------------------------------------------------------------------------------------------------------------------------------------------------------------------------------------------------------------------------------------------------------------------------------------------------------------------------------------------------------------------------------------------------------------------------------------------------------------------------------------|--------------------------------------------------------------------------------------------------------------------------------------------------------------------------------------------------------------------------------------------------------------------------------------------------------------------------------------------------------------------------------------------------------------------------------------------------------------|-----------|-----------------------------------------------------------------------------------------------------------|-----------------|---------------------------------------------------------------------------------------------------------------------------------------------------------------------------------------------------------------------------------------------------------------------------------------------------------------------------------------------------------------------------------------------------------------------|------------------------------------------------------------------------------------------------------------------------------------------------------------------------------------------------------------------------------------------------------------------------------------------------------------------------------------------------------------------------------------------------------------------------------------------------------------------------------------------------------------------------------------------------------------------------------------------------------------------------------------------------------------------------------------------------|--------------------------------------------------------------------------------------------------------------------------------------------------------------|----------------------------------------------------------------------------------------------------------------------------|-----------------------------------------------------------------------------------------------------------------------------------------------------------------------------------------------------------------------------------------------------------------------------------------------------------------------------------------------------------------------------------------------------------------------------------------------------------------------------------------------------------------------------------------------------|-----------|-----------|------------------------------------------------------------------------------------------------------------------------------------------------------------------------------|----------------------------------------------------------------------------------------------------------------------------------------|
| <p>National Bowel Cancer Audit Project Team</p> | <p>National Bowel Cancer Audit Report</p>                            | <p>2015</p> | <p>National Bowel Cancer Audit</p>                                          | <p>Colon and rectal cancer.</p>                 | <p>Health &amp; Social Care Information Centre, Association of Coloproctology of Great Britain and Ireland, and the Royal College of Surgeons, HQUIP</p> | <p>Leadership from the National Bowel Cancer Audit Project Board. The Health and Social Care Information Centre provides project management and technical infrastructure, while the ACPGBI provides clinical leadership and direction. The audit was carried out by the Clinical Effectiveness Unit (CEU) of the Royal College of Surgeons of England in partnership with the Association of Coloproctologists of Great Britain and Ireland (ACPGBI), and the Health and Social Care Information Centre (HSCIC)</p> | <p>To improve the quality of care and survival of patients with bowel cancer, and meets the requirements as set out in the NHS cancer plan, NICE guidelines and the report of the Bristol Royal Infirmary inquiry. To provide more information on the prevention, diagnosis, treatment and care of this disease and the outcomes. Audit's overall aim is to measure the quality of care and survival of patients with bowel cancer in England and Wales.</p> | <p>NS</p> | <p>Funding by the HQIP as part of the National Clinical Audit and Patient Outcomes Programme (NCAPOP)</p> | <p>BMJ Open</p> | <p>Demographics, date of diagnosis, organisation first seen, source of referral, major site of cancer, performance status, synchronous cancer, planned cancer treatment type, reason for no treatment, TNM category, ASA, monitoring, curability, surgical urgency, primary procedure, surgical access, immediate post-operative care, status of excision margin, treatment modality (all have drop down lists)</p> | <p>All participating trusts submit their data via the Clinical Audit Platform. The Welsh data is submitted directly from the Cancer Network Information System Cymru to the Clinical Audit Platform. The analyses for the report was carried out by the Clinical Effectiveness Unit of the Royal College of Surgeons of England with support from the Health and Social Care Information Centre. The Audit dataset is linked to HES data at the patient level to obtain further information on patient care and follow-up, such as stoma reversal and emergency readmissions in England. HES is useful for analysing patient follow-up, such as emergency readmissions and stoma provision</p> | <p>The dataset has been redesigned to contain fewer items, some of which are mandatory, with the aim of improving data completeness across all patients.</p> | <p>This audit includes data on over 30,000 patients diagnosed with bowel cancer between 1 April 2013 and 31 March 2014</p> | <p>Annual audit reports. The Audit publishes data at the individual surgeon level in terms of 90 day post-operative mortality for patients undergoing elective/scheduled major surgery after being diagnosed with bowel cancer. Also publish the number of procedures performed by each surgeon. The Audit data collection system has the facility to provide feedback to consultants and Trusts about the data they have submitted. Most results are descriptive and are presented in simple tables with percentages of patients in each group</p> | <p>NS</p> | <p>NS</p> | <p>NS</p>                                                                                                                                                                    | <p>NS</p> <p>Data protection and privacy is an important part of the Audit. No individual patient can be identified in the results</p> |
| <p>The Ear Foundation</p>                       | <p>The UK National Registry for Bone Conducting Hearing Implants</p> | <p>2015</p> | <p>The UK National Registry for Bone Conducting Hearing Implants (BCHI)</p> | <p>Bone Conduction Hearing Implant Registry</p> | <p>13 centres performing BCHI</p>                                                                                                                        | <p>Ear Foundation</p>                                                                                                                                                                                                                                                                                                                                                                                                                                                                                               | <p>To identify the number of BCHI nationwide and eventually worldwide, to secure funding for BCHIs, to inform policy and practice, to help plan services.</p>                                                                                                                                                                                                                                                                                                | <p>NS</p> | <p>Supported by Oticon Medical and Cochlear Europe</p>                                                    | <p>NS</p>       | <p>Demographics, unilateral/bilateral hearing loss, unilateral/bilateral fitting of BCHI, aetiology of hearing loss. Will include usage and indications for BCHI</p>                                                                                                                                                                                                                                                | <p>Data is sent by the participating centre to The Ear Foundation.</p>                                                                                                                                                                                                                                                                                                                                                                                                                                                                                                                                                                                                                         | <p>NS</p>                                                                                                                                                    | <p>Number of users is 3104</p>                                                                                             | <p>Website report</p>                                                                                                                                                                                                                                                                                                                                                                                                                                                                                                                               | <p>NS</p> | <p>NS</p> | <p>NS</p> <p>Provides outcomes data and can provide evidence of clinical cost-effectiveness. It can help secure funding of BCHIs. It can help inform policy and practice</p> | <p>NS</p> <p>All data are securely stored and kept confidential</p>                                                                    |



|                        |                                                                                                       |      |                                   |                                   |                                                                                                                                                                                                                                                                                                                                             |                     |                                                                                                                                                                                                                                           |                                                                                                      |    |          |    |                                                                                                                                                                                                                                                                                                                                                                                                                                                                                                                                                                                                                                                                                                                                                                                                                                                                                                                                                                                                                                                                                                                                                                                                                                                                                                                                                                                                                                                                                                                                                                                                                      |    |    |                                                                                                                                                                                                                                                                                                                                                                                                                                                                                   |    |                                                                                                                                                                                                                     |    |                                                                                                                                                                                                                                                                                                                                                                                                                                                                                                                                                                                                                                                             |
|------------------------|-------------------------------------------------------------------------------------------------------|------|-----------------------------------|-----------------------------------|---------------------------------------------------------------------------------------------------------------------------------------------------------------------------------------------------------------------------------------------------------------------------------------------------------------------------------------------|---------------------|-------------------------------------------------------------------------------------------------------------------------------------------------------------------------------------------------------------------------------------------|------------------------------------------------------------------------------------------------------|----|----------|----|----------------------------------------------------------------------------------------------------------------------------------------------------------------------------------------------------------------------------------------------------------------------------------------------------------------------------------------------------------------------------------------------------------------------------------------------------------------------------------------------------------------------------------------------------------------------------------------------------------------------------------------------------------------------------------------------------------------------------------------------------------------------------------------------------------------------------------------------------------------------------------------------------------------------------------------------------------------------------------------------------------------------------------------------------------------------------------------------------------------------------------------------------------------------------------------------------------------------------------------------------------------------------------------------------------------------------------------------------------------------------------------------------------------------------------------------------------------------------------------------------------------------------------------------------------------------------------------------------------------------|----|----|-----------------------------------------------------------------------------------------------------------------------------------------------------------------------------------------------------------------------------------------------------------------------------------------------------------------------------------------------------------------------------------------------------------------------------------------------------------------------------------|----|---------------------------------------------------------------------------------------------------------------------------------------------------------------------------------------------------------------------|----|-------------------------------------------------------------------------------------------------------------------------------------------------------------------------------------------------------------------------------------------------------------------------------------------------------------------------------------------------------------------------------------------------------------------------------------------------------------------------------------------------------------------------------------------------------------------------------------------------------------------------------------------------------------|
| Hazari A.<br>Walton P. | The UK National Flap Registry (UKNFR): A National Database for all pedicled and free flaps in the UK. | 2015 | UK National Flap Registry (UKNFR) | Pedicled and free flap operations | British Association of Plastic Reconstructive and Aesthetic Surgeons (BAPRAS), British Association of Head and Neck Oncologists (BAHNO), British Association of Oral and Maxillofacial Surgeons (BAOMS) and Association of Breast Surgery (ABS). Supported by Prof Danny Keenan, Medical Director of HQIP and a practicing cardiac surgeon. | Managed by Dendrite | To collect information on all free and major pedicled flap reconstructions for the Head & Neck, Breast, Upper & Lower Limb, Pelvium and Trunk carried out in the UK and through this, assess the quality of care we provide for patients. | The registry is multi-browser and will work on Safari, Google Chrome, Firefox, and Internet Explorer | NS | BMJ Open | NS | There are time-triggered PROMs questionnaires being sent directly to the patient via an automated text/email app and collated centrally, removing the human interface. Keep it as simple as possible for surgeons to use and keep it quick. The UKNFR notes that there is a learning curve speed to entering the data, and initially testers found the first few flaps data entry to take longer than 15-20 min. Once a user conducts a dozen cases or more then the system should become much more familiar only take you a few minutes. It is useful for surgeons - they can use the data for appraisal and revalidation. Outcomes, including PROMs, are high on the NHS agenda; revalidation, robust appraisal and transparency will make such data essential for an individual surgeon as well as for the hospital, and UKNFR will be a powerful resource to deliver this data. The registry is multi-browser and will work on Safari, Google Chrome, Firefox, and Internet Explorer - this makes it easier for the registry to be used. The registry can be accessed on an iPad in a secure and quick manner - the UKNFR is completely tablet device compatible. All incomplete data are highlighted by a yellow triangle and when this is clicked it takes you straight to the field that needs to be completed. The patient record list uses a 'traffic-light' system: an amber background colour indicates incomplete data, green is complete data and red, which is a rare event, will indicate that a patient has died perioperatively. An amber background colour will persist until mandatory fields are | NS | NS | Patient Reported Outcome Measures (PROMs) are being collected for Breast and Lower Limb Reconstructio ns, with time-triggered questionnaires being sent directly to the patient via an automated text/ email app and collated centrally, removing the human interface. For Breast surgery, three BreastQ Reconstructiv e modules: satisfaction with outcome, satisfaction with information and satisfaction with breast, will be sent directly to the patient at 6 and 12 months. | NS | The data can be used by surgeons for appraisal and revalidation as required by the General Medical Council. The registry will allow appropriate comparison of clinical performance with national and regional peers | NS | The registry requires the entry of patient confidential information. Once these are approved, it means that the user will not have to ask for consent from patients to enter personal confidential information into UKNFR, such as name, date of birth. Until these are granted, written consent must be taken from each patient. For collation at a national level, all personal information is anonymised so that patients cannot be identified. User must accept the Terms of Conditions and privacy policy when you first register. UKNFR has a "secure" server, which automatically encrypts data traffic between the sever and the "client" computers |
|------------------------|-------------------------------------------------------------------------------------------------------|------|-----------------------------------|-----------------------------------|---------------------------------------------------------------------------------------------------------------------------------------------------------------------------------------------------------------------------------------------------------------------------------------------------------------------------------------------|---------------------|-------------------------------------------------------------------------------------------------------------------------------------------------------------------------------------------------------------------------------------------|------------------------------------------------------------------------------------------------------|----|----------|----|----------------------------------------------------------------------------------------------------------------------------------------------------------------------------------------------------------------------------------------------------------------------------------------------------------------------------------------------------------------------------------------------------------------------------------------------------------------------------------------------------------------------------------------------------------------------------------------------------------------------------------------------------------------------------------------------------------------------------------------------------------------------------------------------------------------------------------------------------------------------------------------------------------------------------------------------------------------------------------------------------------------------------------------------------------------------------------------------------------------------------------------------------------------------------------------------------------------------------------------------------------------------------------------------------------------------------------------------------------------------------------------------------------------------------------------------------------------------------------------------------------------------------------------------------------------------------------------------------------------------|----|----|-----------------------------------------------------------------------------------------------------------------------------------------------------------------------------------------------------------------------------------------------------------------------------------------------------------------------------------------------------------------------------------------------------------------------------------------------------------------------------------|----|---------------------------------------------------------------------------------------------------------------------------------------------------------------------------------------------------------------------|----|-------------------------------------------------------------------------------------------------------------------------------------------------------------------------------------------------------------------------------------------------------------------------------------------------------------------------------------------------------------------------------------------------------------------------------------------------------------------------------------------------------------------------------------------------------------------------------------------------------------------------------------------------------------|

1  
2  
3  
4  
5  
6  
7  
8  
9  
10  
11  
12  
13  
14  
15  
16  
17  
18  
19  
20  
21  
22  
23  
24  
25  
26  
27  
28  
29  
30  
31  
32  
33  
34  
35  
36  
37  
38  
39  
40  
41  
42  
43  
44  
45  
46  
47

55

1  
2  
3  
4  
5  
6  
7  
8  
9  
10  
11  
12  
13  
14  
15  
16  
17  
18  
19  
20  
21  
22  
23  
24  
25  
26  
27  
28  
29  
30  
31  
32  
33  
34  
35  
36  
37  
38  
39  
40  
41  
42  
43  
44  
45  
46  
47

|                                                                                                                                       |                                                                                                                        |              |                                                           |                                    |                                                                                                                                                                                                                                                                |                                                                                                                                                                                                                                                                                                                                                                 |                                                                                                                                                                                                                            |                                                                                                                                                         |                                                                                                                                                                                                                                                                                                                                                                                                                                                                                                                                                                                                                                                                                  |                                                                                                                                                                                                                                                               |                                                                                                                                                                                                                                                                                                                                                    |                                                                                                                                                                                                                                                                                                                                                                                                                                                                                                                                                                                                                         |                                                                                                                                                                                                                                                    |                                                                                                  |                                                                                                                                                                                                   |                                                                                                                             |                                                                                                                                                                                                                                                                                                                                                                                                                                                                                                                                                                                                                                                                                                                                                                                                                                                     |                                                                                    |                                                                                                                                                                                                                                                                                                                                                                                                                                                                                                                                                                                                                                                                                                                                                                                                                                                         |
|---------------------------------------------------------------------------------------------------------------------------------------|------------------------------------------------------------------------------------------------------------------------|--------------|-----------------------------------------------------------|------------------------------------|----------------------------------------------------------------------------------------------------------------------------------------------------------------------------------------------------------------------------------------------------------------|-----------------------------------------------------------------------------------------------------------------------------------------------------------------------------------------------------------------------------------------------------------------------------------------------------------------------------------------------------------------|----------------------------------------------------------------------------------------------------------------------------------------------------------------------------------------------------------------------------|---------------------------------------------------------------------------------------------------------------------------------------------------------|----------------------------------------------------------------------------------------------------------------------------------------------------------------------------------------------------------------------------------------------------------------------------------------------------------------------------------------------------------------------------------------------------------------------------------------------------------------------------------------------------------------------------------------------------------------------------------------------------------------------------------------------------------------------------------|---------------------------------------------------------------------------------------------------------------------------------------------------------------------------------------------------------------------------------------------------------------|----------------------------------------------------------------------------------------------------------------------------------------------------------------------------------------------------------------------------------------------------------------------------------------------------------------------------------------------------|-------------------------------------------------------------------------------------------------------------------------------------------------------------------------------------------------------------------------------------------------------------------------------------------------------------------------------------------------------------------------------------------------------------------------------------------------------------------------------------------------------------------------------------------------------------------------------------------------------------------------|----------------------------------------------------------------------------------------------------------------------------------------------------------------------------------------------------------------------------------------------------|--------------------------------------------------------------------------------------------------|---------------------------------------------------------------------------------------------------------------------------------------------------------------------------------------------------|-----------------------------------------------------------------------------------------------------------------------------|-----------------------------------------------------------------------------------------------------------------------------------------------------------------------------------------------------------------------------------------------------------------------------------------------------------------------------------------------------------------------------------------------------------------------------------------------------------------------------------------------------------------------------------------------------------------------------------------------------------------------------------------------------------------------------------------------------------------------------------------------------------------------------------------------------------------------------------------------------|------------------------------------------------------------------------------------|---------------------------------------------------------------------------------------------------------------------------------------------------------------------------------------------------------------------------------------------------------------------------------------------------------------------------------------------------------------------------------------------------------------------------------------------------------------------------------------------------------------------------------------------------------------------------------------------------------------------------------------------------------------------------------------------------------------------------------------------------------------------------------------------------------------------------------------------------------|
| <p>Conroy S.S.<br/>Rochester M.A.</p>                                                                                                 | <p>Nephroureterecto my surgery in the UK in 2012: British Association of Urological Surgeons (BAUS) Registry data.</p> | <p>201 5</p> | <p>BAUS Registry data for Nephroureterecto my surgery</p> | <p>Nephroureterecto my surgery</p> | <p>BAUS, Nuvola BAUS</p>                                                                                                                                                                                                                                       | <p>To respond to the government initiative for the compulsory reporting of surgeon-specific outcomes for surgery, the BAUS required urologists performing any nephrectomy surgery in England to enter their data for all such surgery. To provide an accurate description of current practice to facilitate audit of individual surgeon and centre outcomes</p> | <p>Data entry was invited from all urologists within the UK. Data were entered by each individual surgeon's team to a web-based database tool established by the BAUS Section of Oncology and commissioned from Nuvola</p> | <p>Funding from Nuvola</p>                                                                                                                              | <p><b>BMJ Open</b><br/>Basic demographic details; 59 patient-specific parameters were included</p>                                                                                                                                                                                                                                                                                                                                                                                                                                                                                                                                                                               | <p>Registry data entered by each individual surgeon's team. Before any formal analysis, a process of 'data cleansing' was undertaken centrally by a BAUS committee to address inconsistencies between the listed surgery and the preoperative indication.</p> | <p>A few of the data items were mandatory, but there was no obligation to provide complete data. Collected data was under the following themes: (i) Presentation and indication; (ii) Diagnosis and co-morbidity; (iii) Stage of malignancy; (iv) Surgeon; (v) Details of procedure; (vi) Outcome and complications; and (vii) Histopathology.</p> | <p>Entry of data to the database was made available to all urologists within the UK. 6042 nephrectomy surgeries reported to BAUS in 2012. there is no requirement for urologists in England to have membership of BAUS, there is no other similar national organisation within the UK. It is thought that the data for nephrectomy surgery gathered by the BAUS encompasses &gt;80% of all such surgery performed in the UK in 2012, representing a substantial strength of the present publication.</p>                                                                                                                | <p>Annual Reports</p>                                                                                                                                                                                                                              | <p>NS</p>                                                                                        | <p>Some cases performed within the private healthcare system may have eluded reporting in this dataset, but there is no reasonable evidence to suggest that this introduced significant bias.</p> | <p>The registry offers considerable insight into current practice patterns surrounding NU surgery within the UK in 2012</p> | <p>NS</p>                                                                                                                                                                                                                                                                                                                                                                                                                                                                                                                                                                                                                                                                                                                                                                                                                                           | <p>Access to this database was provided by the BAUS and was password protected</p> |                                                                                                                                                                                                                                                                                                                                                                                                                                                                                                                                                                                                                                                                                                                                                                                                                                                         |
| <p>Caskey F. Castledine C. Dawnay A. Farrington K. Fogarty D. Fraser S. Kumwenda M. MacPhee I. Sinha MD. Steenkamp R. Williams AJ</p> | <p>UK Renal Registry - Eighteenth Annual Report</p>                                                                    | <p>201 5</p> | <p>UK Renal Registry</p>                                  | <p>Renal surgery</p>               | <p>Renal Association, The Scottish Renal Registry, The British Association of Paediatric Nephrology, PatientView, The UK Registry for Rare Kidney Diseases (RadKa), The Northern Ireland Paediatric Nephrology Forum and The Welsh Renal Clinical Network.</p> | <p>The UKRR reports directly into the Renal Information Governance Board (RIGB) of the Renal Association. From the beginning, the management committee had representatives from the British Association of Paediatric Nephrologists (BAPN), the British Transplant Society (BTS), the Scottish Renal Registry (SRR) and patient organisations.</p>              | <p>To facilitate improvements in patient care by auditing against national standards and supporting research, innovation and quality improvement.</p>                                                                      | <p>The UK Renal Registry (UKRR) was established by the Renal Association in 1995 as a resource for the development of patient care in renal disease</p> | <p>Initially funded by the Department of Health and industry (1995), but within two years was financially independent of both. It is now principally funded through an annual capitation fee levied on renal replacement therapy (RRT) patients; this currently (2016) stands at £27.50 per patient in England and £22.50 in Wales and Northern Ireland, levied as separate fees for the UKRR and PatientView on dialysis and transplant patients; this represents less than 0.08% of the average annual cost of treating these patients. Some projects and collaborations receive funding through linkages with other organisations or grants for research and development.</p> | <p>The idea of the dataset is to give a complete picture of every renal patient-demographics, comorbidity, test results, renal replacement therapy (RRT) and medication</p>                                                                                   | <p>The idea of the dataset is to give a complete picture of every renal patient-demographics, comorbidity, test results, renal replacement therapy (RRT) and medication</p>                                                                                                                                                                        | <p>Data are collected on a quarterly basis via an automatic download from renal unit databases. Work with partners to ensure accurate extraction of data from NHS IT systems. They work with academics and others to ensure analysis is robust and accurate. Ensuring quality assurance and quality improvement is built into all aspects of the registry. The registry can capture real-time data from renal centres. The UKRR and the Health and Social Care Information Centre (HSCIC) have agreed that there could be considerable benefits for patients from routine linkage with Hospital Episode Statistics.</p> | <p>High quality clinical databases open to requests from researchers. Participation is mandated in England through the NHS National Service Specification and the Chief Executive of each Trust is responsible for adherence to this contract.</p> | <p>UKRR collects, analyses and reports on data from 71 adult and 13 paediatric renal centres</p> | <p>Annual reports in a form that are easily accessible to patients, clinicians, commissioners, policy makers and anyone with an interest in renal disease.</p>                                    | <p>NS</p>                                                                                                                   | <p>Registries can improve the health of the population in many ways. Their data can be used to generate and refine hypotheses that require testing, to inform optimal study design, to provide the evidence of need for the research to help secure funding, to provide an efficient framework for sampling and data collection in trials, to track changes in practice and finally and most importantly to monitor changes in population health outcomes. The registry is able to support an efficient randomised controlled trial (SIMPLIFIED) by providing daily feeds of laboratory data and securely destroyed at the end of the agreed period. The UKRR operates within a comprehensive governance framework which concerns data handling, reporting and research, including data linkages and sharing agreements. The UKRR has temporary</p> | <p>NS</p>                                                                          | <p>The UK Renal Registry is part of the Renal Association, a not for profit organisation registered with the Charity Commission. They try to ensure that all data are extracted, stored and used in line with good information governance and Caldicott principles. Permissions for the UKRR to undertake research and linkage with data have had to be established and it has become clear that research ethics approval is needed for all work that is not audit or quality assurance. The registry approves a number of requests for data sharing. Data are shared for specific analyses only and securely destroyed at the end of the agreed period. The UKRR operates within a comprehensive governance framework which concerns data handling, reporting and research, including data linkages and sharing agreements. The UKRR has temporary</p> |

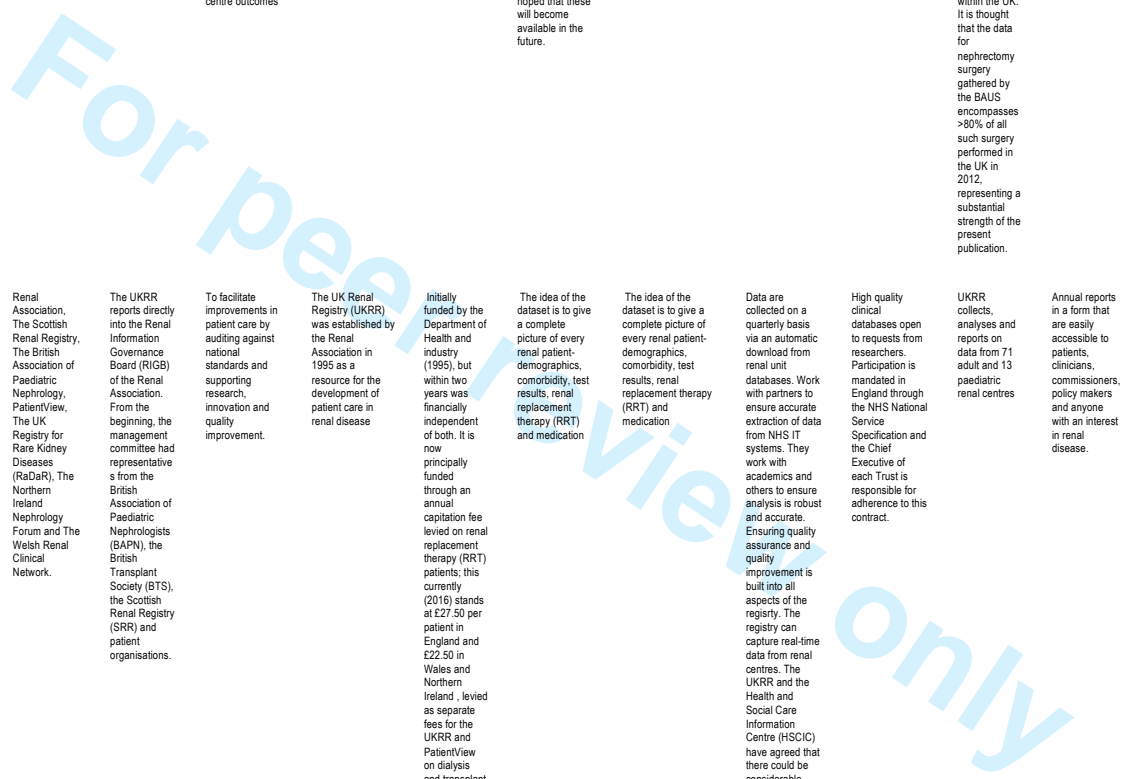

Support the UK in issues relating to information governance and patient consent; Use personal networks to spread awareness of the UKRR and its work with the council; Occasionally represent the Patient Council and the UKRR at other external meetings.

mortality. In the last year the registry has been a co-applicant on four grant applications

granted by the Secretary of State for Health under section 251 of The National Health Service Act (2006), to hold patient identifiable data. This exemption is reviewed annually. The UKRR has successfully completed the Connecting for Health information governance toolkit to a satisfactory standard

|               |                                                                                                                      |      |                         |             |    |    |                                                                                                                |    |    |    |    |                                                                                                                                                                                                                                                                                                                                                                                                                                                                                                                                                                                                                                                                                                                         |    |                                                                                                                                                                                                                                                                                                                                                                                                                                                                                                                                                                                                                                                                                                      |    |    |    |                                                                                                      |    |    |  |  |
|---------------|----------------------------------------------------------------------------------------------------------------------|------|-------------------------|-------------|----|----|----------------------------------------------------------------------------------------------------------------|----|----|----|----|-------------------------------------------------------------------------------------------------------------------------------------------------------------------------------------------------------------------------------------------------------------------------------------------------------------------------------------------------------------------------------------------------------------------------------------------------------------------------------------------------------------------------------------------------------------------------------------------------------------------------------------------------------------------------------------------------------------------------|----|------------------------------------------------------------------------------------------------------------------------------------------------------------------------------------------------------------------------------------------------------------------------------------------------------------------------------------------------------------------------------------------------------------------------------------------------------------------------------------------------------------------------------------------------------------------------------------------------------------------------------------------------------------------------------------------------------|----|----|----|------------------------------------------------------------------------------------------------------|----|----|--|--|
| Sabah S.A.    | Are all metal-on-metal hip revision operations contributing to the National Joint Registry implant survival curves?. | 2016 | National Joint Registry | Hip surgery | NS | NS | To examine the data quality of the NJR and to validate data quality on metal-on-metal hip revision procedures. | NS | NS | NS | NS | This study showed that only one third of retrieved components at the London Implant Retrieval Centre, contributed to survival curves on the NJR, this suggests that current NJR data on failure rates may be vulnerable to missing data. The most likely explanation for this appears to be the poor rate of consent, compliance and linkability during the early years of the NJR. The authors recommend that the NJR provide outcome data only for the periods where it has achieved excellent data collection. They also advocate for registry, retrieval linkage to become an integral component of the NJR Data Quality Strategy - this would enable feedback on errors and missing data and improve data quality. | NS | This study showed that only one third of retrieved components at the London Implant Retrieval Centre, contributed to survival curves on the NJR, this suggests that current NJR data on failure rates may be vulnerable to missing data. The most likely explanation for this appears to be the poor rate of consent, compliance and linkability during the early years of the NJR. They found that for the procedures the NJR did record, data quality was excellent. There was no missing data for surgical unit, date of revision, procedure type and implant side. This reflects the engagement from surgeons and Hospital Data Managers and the high quality of the NJR database infrastructure | NS | NS | NS | Large data sets are very helpful for planning provision of health care and to study disease patterns | NS | NS |  |  |
| Henckel J.    |                                                                                                                      |      |                         |             |    |    |                                                                                                                |    |    |    |    |                                                                                                                                                                                                                                                                                                                                                                                                                                                                                                                                                                                                                                                                                                                         |    |                                                                                                                                                                                                                                                                                                                                                                                                                                                                                                                                                                                                                                                                                                      |    |    |    |                                                                                                      |    |    |  |  |
| Koutsouris S. |                                                                                                                      |      |                         |             |    |    |                                                                                                                |    |    |    |    |                                                                                                                                                                                                                                                                                                                                                                                                                                                                                                                                                                                                                                                                                                                         |    |                                                                                                                                                                                                                                                                                                                                                                                                                                                                                                                                                                                                                                                                                                      |    |    |    |                                                                                                      |    |    |  |  |
| Rajani R.     |                                                                                                                      |      |                         |             |    |    |                                                                                                                |    |    |    |    |                                                                                                                                                                                                                                                                                                                                                                                                                                                                                                                                                                                                                                                                                                                         |    |                                                                                                                                                                                                                                                                                                                                                                                                                                                                                                                                                                                                                                                                                                      |    |    |    |                                                                                                      |    |    |  |  |
| Hothi H.      |                                                                                                                      |      |                         |             |    |    |                                                                                                                |    |    |    |    |                                                                                                                                                                                                                                                                                                                                                                                                                                                                                                                                                                                                                                                                                                                         |    |                                                                                                                                                                                                                                                                                                                                                                                                                                                                                                                                                                                                                                                                                                      |    |    |    |                                                                                                      |    |    |  |  |
| Skinner J.A.  |                                                                                                                      |      |                         |             |    |    |                                                                                                                |    |    |    |    |                                                                                                                                                                                                                                                                                                                                                                                                                                                                                                                                                                                                                                                                                                                         |    |                                                                                                                                                                                                                                                                                                                                                                                                                                                                                                                                                                                                                                                                                                      |    |    |    |                                                                                                      |    |    |  |  |
| Hart A.J.     |                                                                                                                      |      |                         |             |    |    |                                                                                                                |    |    |    |    |                                                                                                                                                                                                                                                                                                                                                                                                                                                                                                                                                                                                                                                                                                                         |    |                                                                                                                                                                                                                                                                                                                                                                                                                                                                                                                                                                                                                                                                                                      |    |    |    |                                                                                                      |    |    |  |  |

1  
2  
3  
4  
5  
6  
7  
8  
9  
10  
11  
12  
13  
14  
15  
16  
17  
18  
19  
20  
21  
22  
23  
24  
25  
26  
27  
28  
29  
30  
31  
32  
33  
34  
35  
36  
37  
38  
39  
40  
41  
42  
43  
44  
45  
46  
47



statistically adjust for case-mix. Another factor is that surgical outcomes are not solely dependent on the consultant as other members of the operating team also contribute. It is thus important that team-level data are published as well to reflect the complex interplay of the multi-disciplinary team. The benefits of reporting patient outcomes seem to outweigh the disadvantages, and they should be published.

|              |                                                                                  |      |                        |                |                                                                                                                                 |                        |                                                                                                                                                                                                       |                                                                                                                                                                                                                                                                                                                             |                                                                                                                                                      |                                                                                                                                                                                                                                                                                                                                               |                                                                                                                                                                                                                         |                                                                                                                                                                                                                                                                                                                                                                                                                                                                                                                                                                                                     |                                                                                                                                                                                                                                                                                                                                                                                                                                                                                                                                                                                                                                                                                                                                                                                                                                                                                                                                                                                                                                    |                                                                                                                                                                                                                                                                                                                                                                                                                                                                                        |    |                                                                                                                                                                                                                                                   |                                                                                                                                                                                                                                                                                                                                                                                                                                                                                                                                                                                                                                                                                                                                                                                                                                                                                                                                                      |                                                                                                                                                                                                                                                                                                                                                                                                                                                                                                                                                                                                                                                                               |                                                                                                                                                                                                                                                                                                   |                                                                                                                                                                                                                                                                    |
|--------------|----------------------------------------------------------------------------------|------|------------------------|----------------|---------------------------------------------------------------------------------------------------------------------------------|------------------------|-------------------------------------------------------------------------------------------------------------------------------------------------------------------------------------------------------|-----------------------------------------------------------------------------------------------------------------------------------------------------------------------------------------------------------------------------------------------------------------------------------------------------------------------------|------------------------------------------------------------------------------------------------------------------------------------------------------|-----------------------------------------------------------------------------------------------------------------------------------------------------------------------------------------------------------------------------------------------------------------------------------------------------------------------------------------------|-------------------------------------------------------------------------------------------------------------------------------------------------------------------------------------------------------------------------|-----------------------------------------------------------------------------------------------------------------------------------------------------------------------------------------------------------------------------------------------------------------------------------------------------------------------------------------------------------------------------------------------------------------------------------------------------------------------------------------------------------------------------------------------------------------------------------------------------|------------------------------------------------------------------------------------------------------------------------------------------------------------------------------------------------------------------------------------------------------------------------------------------------------------------------------------------------------------------------------------------------------------------------------------------------------------------------------------------------------------------------------------------------------------------------------------------------------------------------------------------------------------------------------------------------------------------------------------------------------------------------------------------------------------------------------------------------------------------------------------------------------------------------------------------------------------------------------------------------------------------------------------|----------------------------------------------------------------------------------------------------------------------------------------------------------------------------------------------------------------------------------------------------------------------------------------------------------------------------------------------------------------------------------------------------------------------------------------------------------------------------------------|----|---------------------------------------------------------------------------------------------------------------------------------------------------------------------------------------------------------------------------------------------------|------------------------------------------------------------------------------------------------------------------------------------------------------------------------------------------------------------------------------------------------------------------------------------------------------------------------------------------------------------------------------------------------------------------------------------------------------------------------------------------------------------------------------------------------------------------------------------------------------------------------------------------------------------------------------------------------------------------------------------------------------------------------------------------------------------------------------------------------------------------------------------------------------------------------------------------------------|-------------------------------------------------------------------------------------------------------------------------------------------------------------------------------------------------------------------------------------------------------------------------------------------------------------------------------------------------------------------------------------------------------------------------------------------------------------------------------------------------------------------------------------------------------------------------------------------------------------------------------------------------------------------------------|---------------------------------------------------------------------------------------------------------------------------------------------------------------------------------------------------------------------------------------------------------------------------------------------------|--------------------------------------------------------------------------------------------------------------------------------------------------------------------------------------------------------------------------------------------------------------------|
| Breakwell LM | Should we all go to the PROM? The first two years of the British Spine Registry. | 2015 | British Spine Register | Spinal surgery | The British Association of Spine Surgeons, the British Scoliosis Society (BSS) and the Society of British Neurological Surgeons | BSR Steering Committee | The purpose of the BSR is to collate information on the current state of spinal surgery within the United Kingdom in order to identify areas of best practice and so facilitate improved patient care | The British Association of Spine Surgeons instituted the design, construction and rollout of the British Spine Registry. The BSR, built on the Amplitude platform, (Amplitude Clinical, Droitwich, Worcestershire) was constructed to be a secure Internet based repository freely available to the societies' memberships. | Recent funding support from NHS England. Recurring funding to ensure expansion of the Registry is being sought independently of the spine societies. | Collection of outcome measures after surgery, including patient reported scores is central to the function of the BSR. To give a more reliable overview of current spinal activity in the United Kingdom a mandatory dataset has been determined. The BSR team decided to collect PROMs for specific procedures at predetermined time points. | The standard patient questionnaires will include the EuroQoL EQ-5D, VAS and the Oswestry Disability Index. A satisfaction assessment akin to the Friends and Family tool will also be used at the final follow-up stage | The surgical team can enter scores retrospectively after paper form collection or the data can be entered prospectively by the patient themselves either via an email portal, a personal computer, a tablet or a smartphone while the patient is in outpatients. To this end, the BSR is in discussion with NHS England, the National Institute for Health and Care Excellence, HQIP, the Private Healthcare Information Network and the Association of British Healthcare Industries, amongst others, to enshrine the BSR as the central resource for spinal surgical data for the United Kingdom. | Until mandatory status is achieved, it is unlikely the true value of the BSR will be realised. At present, this is largely beyond the direct control of the Spine Societies, but progress made through the British Orthopaedic Association's Quality Outcomes Committee. Since 2009 it has been a mandatory requirement for all facilities providing care to NHS patients undergoing hip and knee arthroplasty, groin hernia repair and varicose vein surgery to participate in the national PROMs programmes. The BSR has been designed to enable multiple modes of capture, either by secure email, or via touchscreen input on a tablet or kiosk computer while the patient is in outpatients which should reduce questionnaire fatigue. Support is needed from NHS trusts and private providers that offer NHS treatment in terms of recognition of the time and logistical requirements of capturing this type of data on large numbers of patients. Need the support and input of the stakeholders. Raising awareness of the | Since its launch in 2012, over 650 users have registered more than 27 000 patients onto the database. These users include representatives from all aspects of the surgical team including surgeons and nurses, to admin assistants, physiotherapists, secretaries and doctors in training. At the 2014 annual scientific meeting of the BSS in Bristol, it was announced that the Society aimed to achieve 100% data capture by the end of 2016. Current uptake of the registry is 15% | NS | Data can be entered prospectively by the patient themselves either via an email portal, a personal computer, a tablet or a smartphone while the patient is in outpatients. Over 12,000 forms have been directly submitted by patients themselves. | There are difficulties around the recording of outcomes following spinal interventions, often because of the heterogeneous nature of the conditions being treated, as well as the significant psychosocial component of patients' presentations. It is uncertain whether the validated and widely accepted generic and disease-specific tools that are currently in use truly discriminate between good and bad operations. In some circumstances they have been shown to be inadequate. Limited outcomes tools may not be able to express fully the true extent of the patient's experience, but they are a start. Practical problems remain with regard to the collection of data, including patient engagement. Many units struggle to facilitate data entry due to the pressures of numbers in clinics and poor infrastructure investment at hospital level. The funding to enable collection is limited, despite the national mandate to do so. | Allow comparison of unit level results such as deep infection rates in scoliosis correction surgery. NHS trusts in England are already obliged to provide PROMS outcomes for surgery, but this has been implemented in a patchy and haphazard manner - the BSR is a valuable resource that would allow a systematic implementation of this policy. SR already gives a national picture of spinal surgery including case mix, volumes and trends, which informs debate and policy making. An additional intention of the design is to facilitate national research via multicentre trials supported by a low-cost data capture system that is secure, reliable and accessible. | Registry can be defined as a systematic collection of a clearly defined set of health and demographic data for patients with specific health characteristics, held in a central database for a predefined purpose'. Registries have limited value unless the data entry is relevant and complete. | Secure Internet based registry. Currently, surgeons and their teams, under the auspices of the Societies, own and control the data on the BSR - this should ensure the accuracy and reliability of such information with specific reference to the surgical detail |
|--------------|----------------------------------------------------------------------------------|------|------------------------|----------------|---------------------------------------------------------------------------------------------------------------------------------|------------------------|-------------------------------------------------------------------------------------------------------------------------------------------------------------------------------------------------------|-----------------------------------------------------------------------------------------------------------------------------------------------------------------------------------------------------------------------------------------------------------------------------------------------------------------------------|------------------------------------------------------------------------------------------------------------------------------------------------------|-----------------------------------------------------------------------------------------------------------------------------------------------------------------------------------------------------------------------------------------------------------------------------------------------------------------------------------------------|-------------------------------------------------------------------------------------------------------------------------------------------------------------------------------------------------------------------------|-----------------------------------------------------------------------------------------------------------------------------------------------------------------------------------------------------------------------------------------------------------------------------------------------------------------------------------------------------------------------------------------------------------------------------------------------------------------------------------------------------------------------------------------------------------------------------------------------------|------------------------------------------------------------------------------------------------------------------------------------------------------------------------------------------------------------------------------------------------------------------------------------------------------------------------------------------------------------------------------------------------------------------------------------------------------------------------------------------------------------------------------------------------------------------------------------------------------------------------------------------------------------------------------------------------------------------------------------------------------------------------------------------------------------------------------------------------------------------------------------------------------------------------------------------------------------------------------------------------------------------------------------|----------------------------------------------------------------------------------------------------------------------------------------------------------------------------------------------------------------------------------------------------------------------------------------------------------------------------------------------------------------------------------------------------------------------------------------------------------------------------------------|----|---------------------------------------------------------------------------------------------------------------------------------------------------------------------------------------------------------------------------------------------------|------------------------------------------------------------------------------------------------------------------------------------------------------------------------------------------------------------------------------------------------------------------------------------------------------------------------------------------------------------------------------------------------------------------------------------------------------------------------------------------------------------------------------------------------------------------------------------------------------------------------------------------------------------------------------------------------------------------------------------------------------------------------------------------------------------------------------------------------------------------------------------------------------------------------------------------------------|-------------------------------------------------------------------------------------------------------------------------------------------------------------------------------------------------------------------------------------------------------------------------------------------------------------------------------------------------------------------------------------------------------------------------------------------------------------------------------------------------------------------------------------------------------------------------------------------------------------------------------------------------------------------------------|---------------------------------------------------------------------------------------------------------------------------------------------------------------------------------------------------------------------------------------------------------------------------------------------------|--------------------------------------------------------------------------------------------------------------------------------------------------------------------------------------------------------------------------------------------------------------------|

1  
2  
3  
4  
5  
6  
7  
8  
9  
10  
11  
12  
13  
14  
15  
16  
17  
18  
19  
20  
21  
22  
23  
24  
25  
26  
27  
28  
29  
30  
31  
32  
33  
34  
35  
36  
37  
38  
39  
40  
41  
42  
43  
44  
45  
46  
47

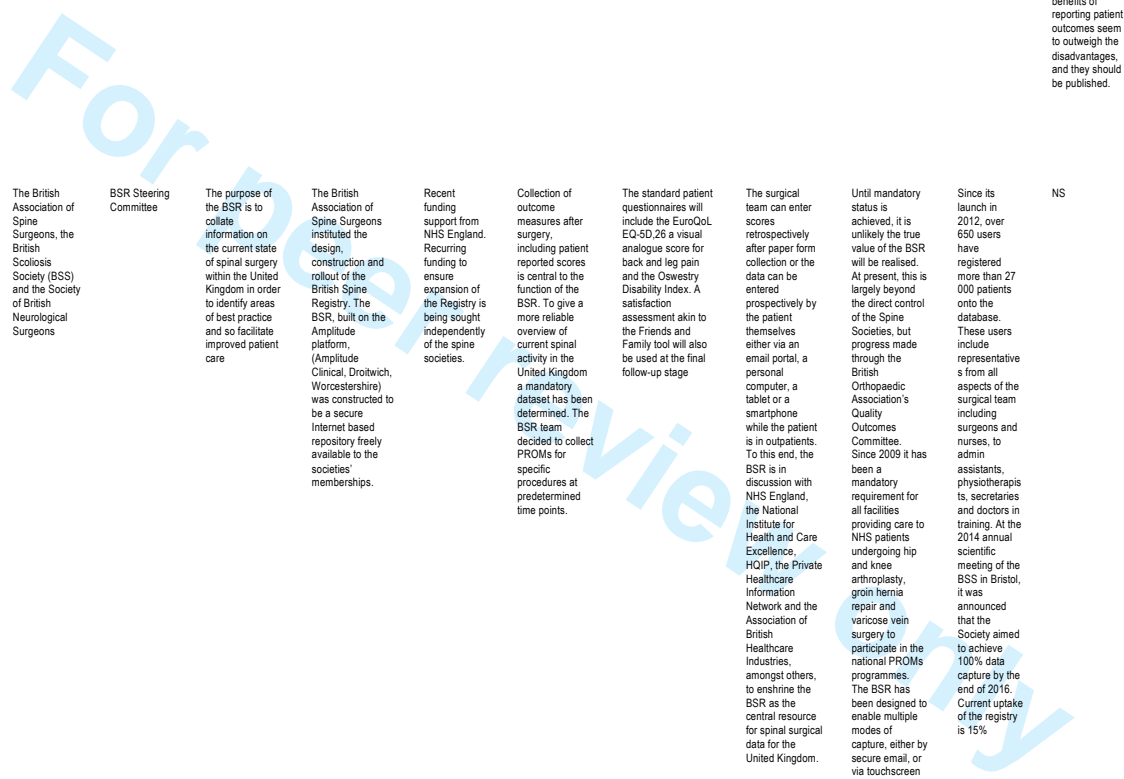



registry is vital through wider publicity. Currently, surgeons and their teams, under the auspices of the Societies, own and control the data on the BSR - this should ensure the accuracy and reliability of such information with specific reference to the surgical detail

1  
2  
3  
4  
5  
6  
7  
8  
9  
10  
11  
12  
13  
14  
15  
16  
17  
18  
19  
20  
21  
22  
23  
24  
25  
26  
27  
28  
29  
30  
31  
32  
33  
34  
35  
36  
37  
38  
39  
40  
41  
42  
43  
44  
45  
46  
47

|           |           |      |           |         |                                                                                                  |    |                        |                                                                                                                                                                                                                                          |             |    |                                                                                                                                                                                                                                                                                                                                                                                                                                                                                                                                                                                                                                                                                                                                                                                                          |                                                               |                                                                                                                                                                                                                                                                                                                                                                                                                                                                                                                                                                                                                     |                                                                                                                                        |                                             |    |    |                                                                                                                                                                                                                                                                                          |    |                                                                                                                                                                                                                                                                                                                                                                                                                            |
|-----------|-----------|------|-----------|---------|--------------------------------------------------------------------------------------------------|----|------------------------|------------------------------------------------------------------------------------------------------------------------------------------------------------------------------------------------------------------------------------------|-------------|----|----------------------------------------------------------------------------------------------------------------------------------------------------------------------------------------------------------------------------------------------------------------------------------------------------------------------------------------------------------------------------------------------------------------------------------------------------------------------------------------------------------------------------------------------------------------------------------------------------------------------------------------------------------------------------------------------------------------------------------------------------------------------------------------------------------|---------------------------------------------------------------|---------------------------------------------------------------------------------------------------------------------------------------------------------------------------------------------------------------------------------------------------------------------------------------------------------------------------------------------------------------------------------------------------------------------------------------------------------------------------------------------------------------------------------------------------------------------------------------------------------------------|----------------------------------------------------------------------------------------------------------------------------------------|---------------------------------------------|----|----|------------------------------------------------------------------------------------------------------------------------------------------------------------------------------------------------------------------------------------------------------------------------------------------|----|----------------------------------------------------------------------------------------------------------------------------------------------------------------------------------------------------------------------------------------------------------------------------------------------------------------------------------------------------------------------------------------------------------------------------|
| AuditData | AuditBase | 2016 | AuditBase | Otology | Six expert implant teams in England, Scotland and Wales have given input to develop the database | NS | To increase efficiency | User-friendly and easy to navigate. Integrates all audiology disciplines in one system for maximum flexibility and resource management. Six expert implant teams in England, Scotland and Wales have given input to develop the database | Self funded | NS | Patient demographics, GP information, medical background, Pre-op assessment, contact details, baseline hearing (audiograms and other hearing tests), date of surgery, Ear side, surgical approach, implant details, surgical consent including date, Pre and post operative information, surgical information, 2 to 5 months after surgery , over one year after surgery, recording patient drop out; air conduction, bone conduction, air-bone-gap, graphical overlay of audiograms, visual indicator of Belfast rule of thumb success; Histograms of trends in air and bone means over extended periods, OAE, ABR and CERA measurements, 32 speech and language and speech discrimination tests summary score screens, name of clinician, CT/MRI scans, patient questionnaires regarding their results | Advanced connectivity between AuditBase and Hospital systems. | Data is easy to access, user-friendly and easy to navigate. Integrates all disciplines in one system for maximum flexibility and resource management. Core data entry forms. A checklist to ensure that all the necessary steps have been completed, easy access to data for research purposes, can use the registry from remote (off-site) locations, allows complete exporting of data to Excel, has built in patient reports with hearing results. Helps you send letters to patients and healthcare professionals. Can also be used to send mobile phone text reminders to patients for clinics and operations. | Used in more than 80% of all hospital audiology clinics in the UK and Scandinavia. More than 4500 users in over 500 audiology clinics. | The system helps you generate audit reports | NS | NS | Enables you to plan and easily visualise a patients pathway. It can help you keep control of expenditure and gain funds from commissioners. Gives you information on patient preferences. Helps you report data. Helps you manage stock levels and help with managing purchase ordering. | NS | AuditBase is CE-marked as a medical device (class I) under the EU Medical Device Directive. It is registered with the UK ICO-Information Commissioners Office (required by the Data Protection Act). NS and ISO 27001 (information security) certified. Completed the NHS Information Governance Statement of Compliance and therefore comply with all legal requirements of the NHS to safeguard patient confidentiality. |
|-----------|-----------|------|-----------|---------|--------------------------------------------------------------------------------------------------|----|------------------------|------------------------------------------------------------------------------------------------------------------------------------------------------------------------------------------------------------------------------------------|-------------|----|----------------------------------------------------------------------------------------------------------------------------------------------------------------------------------------------------------------------------------------------------------------------------------------------------------------------------------------------------------------------------------------------------------------------------------------------------------------------------------------------------------------------------------------------------------------------------------------------------------------------------------------------------------------------------------------------------------------------------------------------------------------------------------------------------------|---------------------------------------------------------------|---------------------------------------------------------------------------------------------------------------------------------------------------------------------------------------------------------------------------------------------------------------------------------------------------------------------------------------------------------------------------------------------------------------------------------------------------------------------------------------------------------------------------------------------------------------------------------------------------------------------|----------------------------------------------------------------------------------------------------------------------------------------|---------------------------------------------|----|----|------------------------------------------------------------------------------------------------------------------------------------------------------------------------------------------------------------------------------------------------------------------------------------------|----|----------------------------------------------------------------------------------------------------------------------------------------------------------------------------------------------------------------------------------------------------------------------------------------------------------------------------------------------------------------------------------------------------------------------------|

|   |                                                                                                                                      |                                    |      |                                 |         |                                                                                                                                                                                                                                                                                                                |    |                                                                                                                                                                                                                                                                                                                                                                                                                                                                                                                                                                                                                                                                                                                                                                                                                                                                                                                                                                                                                                               |    |                                                                                                                                                                                                                                                                                                                                                                                                                                                                                                                                                                                                                                   |    |                                                                                                                                      |    |                                                                                                                                                                                                                                                                                                                                                                                                                                                                                                                                                                                                                                                |    |                                                                                                                                                                                                                                                                                                                                                                                                                                                                                                           |    |                                                                                                                                                                                                                                                                                                                                                                                                                                                                       |    |                                                                                                             |    |    |    |                                                                                                                                                                                                                                                                                                                                                                                                                                                                                                                        |    |                                                                                                                                                                                                                                                                                                                                                                                               |
|---|--------------------------------------------------------------------------------------------------------------------------------------|------------------------------------|------|---------------------------------|---------|----------------------------------------------------------------------------------------------------------------------------------------------------------------------------------------------------------------------------------------------------------------------------------------------------------------|----|-----------------------------------------------------------------------------------------------------------------------------------------------------------------------------------------------------------------------------------------------------------------------------------------------------------------------------------------------------------------------------------------------------------------------------------------------------------------------------------------------------------------------------------------------------------------------------------------------------------------------------------------------------------------------------------------------------------------------------------------------------------------------------------------------------------------------------------------------------------------------------------------------------------------------------------------------------------------------------------------------------------------------------------------------|----|-----------------------------------------------------------------------------------------------------------------------------------------------------------------------------------------------------------------------------------------------------------------------------------------------------------------------------------------------------------------------------------------------------------------------------------------------------------------------------------------------------------------------------------------------------------------------------------------------------------------------------------|----|--------------------------------------------------------------------------------------------------------------------------------------|----|------------------------------------------------------------------------------------------------------------------------------------------------------------------------------------------------------------------------------------------------------------------------------------------------------------------------------------------------------------------------------------------------------------------------------------------------------------------------------------------------------------------------------------------------------------------------------------------------------------------------------------------------|----|-----------------------------------------------------------------------------------------------------------------------------------------------------------------------------------------------------------------------------------------------------------------------------------------------------------------------------------------------------------------------------------------------------------------------------------------------------------------------------------------------------------|----|-----------------------------------------------------------------------------------------------------------------------------------------------------------------------------------------------------------------------------------------------------------------------------------------------------------------------------------------------------------------------------------------------------------------------------------------------------------------------|----|-------------------------------------------------------------------------------------------------------------|----|----|----|------------------------------------------------------------------------------------------------------------------------------------------------------------------------------------------------------------------------------------------------------------------------------------------------------------------------------------------------------------------------------------------------------------------------------------------------------------------------------------------------------------------------|----|-----------------------------------------------------------------------------------------------------------------------------------------------------------------------------------------------------------------------------------------------------------------------------------------------------------------------------------------------------------------------------------------------|
| 1 | Yung M, Gjurić M, Haeusler R, Van de Heyning PH, Martin C, Swan IR, Tange RA, Huy PT, European Otolaryngology Database Project Group | An international otology database. | 2005 | International otology database. | Otology | A working party of 27 otologists from 12 countries in Europe has already agreed on the content of a common ear database. The project group members include otologists from the United Kingdom, Belgium, Switzerland, France, Germany, Croatia, Holland, Sweden, Poland, Slovak Republic, Denmark, and Hungary. | NS | This paper proposes an International Otology Database. The aims of the project are: To identify common otology audit data among clinicians; To provide an information technology system to store otology data for clinicians; To create a large database that allows statistical analysis to be made on various otologic interventions with sufficient power; To produce standards or benchmarks for comparative audit. The web-based system can be a useful learning tool for surgeons because it gives almost real-time feedback to the individual surgeon. This enables clinicians to monitor their own surgical practice against these standards. The Surgical Training Committee can even use it as a tool to implement competency-based training for surgical trainees; The system provides the mechanism for hospitals or clinicians to collaborate in clinical trials using the common data input methodology; The ultimate goal of the proposed project is to provide primary potential research data that is lacking at the moment. | NS | Web-based, prospective data entry. The data entry is either by tick boxes or selections from drop-down boxes. Input errors are validated using information technology techniques to make sure that all data fields are completed. There should be international consensus on the content of the proposed database. A working party of 27 otologists from 12 countries in Europe has already agreed on the content of a common ear database. The project group members include otologists from the United Kingdom, Belgium, Switzerland, France, Germany, Croatia, Holland, Sweden, Poland, Slovak Republic, Denmark, and Hungary. | NS | International consensus on the content of the proposed database. The system must be user-friendly, in both data input and retrieval. | NS | Patient details, proposed operation date, pre-operative symptoms, aim of surgery, risk factors, audiogram results, operative findings, approach, materials used, complications, pathology results, audiogram, follow up intervals, main outcomes, free text for comments. Two levels of data entry are available: Level 1 (a minimum otology database); This is designed for general otolaryngologists and surgical trainees. Only main surgical outcomes are recorded. Level 2 (a comprehensive database); This is designed for dedicated otologists. Detailed information on pathologies, risk factors, and surgical procedure are recorded. | NS | Input errors are validated using information technology techniques to make sure that all data fields are completed. Bias reporting or incorrect data entry will contaminate the quality of the "benchmarking database." Therefore, validation of input data is important. This can be done by site visit of each hospital by an external inspector/auditor (another user of the web-based system) to perform random inspection of patient records. Data used as a benchmark or 'standards' are validated. | NS | Users of the database should not be exclusive to a few selected otologists. The otology audit system is available to any surgeons who perform middle ear operation in Europe. Every data field on the data entry form needs to be completed before the form is accepted by the website, thus ensuring completeness of data entry. The data entry is either by tick boxes or selections from drop-down boxes. Pilot the registry needs to be easy to use and flexible. | NS | The identity of surgeon and patient must remain anonymous. Outcome data used for benchmarking is validated. | NS | NS | NS | Help drive evidence based medicine, helps produce standards or benchmarks for comparative audit between surgeons and centres, provide real time feedback to the individual surgeon, help develop standards for surgical training, helps provide evidence of quality assurance, helps with commissioning, helps with surgical self audit. Allows statistical analysis to be made on various otologic interventions with sufficient power owing to large amounts of data, helps facilitate clinical trials and research. | NS | Each hospital has allocated an access code and a password. They can change their own password once they log in. The identities of the patients and the surgeons are anonymous. Each hospital would be given a Hospital Code Number and each surgeon a Surgeon Code Number. Each patient is identified on the database with an encrypted Patient Code Number created by the individual surgeon |
|---|--------------------------------------------------------------------------------------------------------------------------------------|------------------------------------|------|---------------------------------|---------|----------------------------------------------------------------------------------------------------------------------------------------------------------------------------------------------------------------------------------------------------------------------------------------------------------------|----|-----------------------------------------------------------------------------------------------------------------------------------------------------------------------------------------------------------------------------------------------------------------------------------------------------------------------------------------------------------------------------------------------------------------------------------------------------------------------------------------------------------------------------------------------------------------------------------------------------------------------------------------------------------------------------------------------------------------------------------------------------------------------------------------------------------------------------------------------------------------------------------------------------------------------------------------------------------------------------------------------------------------------------------------------|----|-----------------------------------------------------------------------------------------------------------------------------------------------------------------------------------------------------------------------------------------------------------------------------------------------------------------------------------------------------------------------------------------------------------------------------------------------------------------------------------------------------------------------------------------------------------------------------------------------------------------------------------|----|--------------------------------------------------------------------------------------------------------------------------------------|----|------------------------------------------------------------------------------------------------------------------------------------------------------------------------------------------------------------------------------------------------------------------------------------------------------------------------------------------------------------------------------------------------------------------------------------------------------------------------------------------------------------------------------------------------------------------------------------------------------------------------------------------------|----|-----------------------------------------------------------------------------------------------------------------------------------------------------------------------------------------------------------------------------------------------------------------------------------------------------------------------------------------------------------------------------------------------------------------------------------------------------------------------------------------------------------|----|-----------------------------------------------------------------------------------------------------------------------------------------------------------------------------------------------------------------------------------------------------------------------------------------------------------------------------------------------------------------------------------------------------------------------------------------------------------------------|----|-------------------------------------------------------------------------------------------------------------|----|----|----|------------------------------------------------------------------------------------------------------------------------------------------------------------------------------------------------------------------------------------------------------------------------------------------------------------------------------------------------------------------------------------------------------------------------------------------------------------------------------------------------------------------------|----|-----------------------------------------------------------------------------------------------------------------------------------------------------------------------------------------------------------------------------------------------------------------------------------------------------------------------------------------------------------------------------------------------|

For Peer review only

1  
2  
3  
4  
5  
6  
7  
8  
9  
10  
11  
12  
13  
14  
15  
16  
17  
18  
19  
20  
21  
22  
23  
24  
25  
26  
27  
28  
29  
30  
31  
32  
33  
34  
35  
36  
37  
38  
39  
40  
41  
42  
43  
44  
45  
46  
47

1  
2  
3  
4  
5  
6  
7  
8  
9  
10  
11  
12  
13  
14  
15  
16  
17  
18  
19  
20  
21  
22  
23  
24  
25  
26  
27  
28  
29  
30  
31  
32  
33  
34  
35  
36  
37  
38  
39  
40  
41  
42  
43  
44  
45  
46  
47

|                                           |                                                          |      |                                                 |                              |                                                                                                                                                                        |                                                                                                             |                                                                                                                                                                                                                                                                                                                                                                                                                                                                                                                                                                                                                                                                                                                                                                                                                                                                                                                                                                                                                                                                                           |    |                                                                                                                                                                                                                                                                                                                                                              |                                                                                                                                                                                                                                                                                                                                                                                                                                                                                                                             |                                                                                                                                                                                                                                                                                         |                                                                                                                                                                                                                                                                                                                                                                                                                                                                                                                                                                                                                                                                    |                                                                                                                                                                                                                                                                                                                                                                                                                                                                                                                                                         |                                                                                                                                                                                                                                                                                                                                                                                                              |                                                                                                                  |                                                                                                                                                                                                                                                                                                                                                                                                                    |                                                                                                                                                                                       |                                                                                                                                                                                                                                                                                                                                                                                                                             |                                                                                 |                                                 |                                                                                                                                                                           |
|-------------------------------------------|----------------------------------------------------------|------|-------------------------------------------------|------------------------------|------------------------------------------------------------------------------------------------------------------------------------------------------------------------|-------------------------------------------------------------------------------------------------------------|-------------------------------------------------------------------------------------------------------------------------------------------------------------------------------------------------------------------------------------------------------------------------------------------------------------------------------------------------------------------------------------------------------------------------------------------------------------------------------------------------------------------------------------------------------------------------------------------------------------------------------------------------------------------------------------------------------------------------------------------------------------------------------------------------------------------------------------------------------------------------------------------------------------------------------------------------------------------------------------------------------------------------------------------------------------------------------------------|----|--------------------------------------------------------------------------------------------------------------------------------------------------------------------------------------------------------------------------------------------------------------------------------------------------------------------------------------------------------------|-----------------------------------------------------------------------------------------------------------------------------------------------------------------------------------------------------------------------------------------------------------------------------------------------------------------------------------------------------------------------------------------------------------------------------------------------------------------------------------------------------------------------------|-----------------------------------------------------------------------------------------------------------------------------------------------------------------------------------------------------------------------------------------------------------------------------------------|--------------------------------------------------------------------------------------------------------------------------------------------------------------------------------------------------------------------------------------------------------------------------------------------------------------------------------------------------------------------------------------------------------------------------------------------------------------------------------------------------------------------------------------------------------------------------------------------------------------------------------------------------------------------|---------------------------------------------------------------------------------------------------------------------------------------------------------------------------------------------------------------------------------------------------------------------------------------------------------------------------------------------------------------------------------------------------------------------------------------------------------------------------------------------------------------------------------------------------------|--------------------------------------------------------------------------------------------------------------------------------------------------------------------------------------------------------------------------------------------------------------------------------------------------------------------------------------------------------------------------------------------------------------|------------------------------------------------------------------------------------------------------------------|--------------------------------------------------------------------------------------------------------------------------------------------------------------------------------------------------------------------------------------------------------------------------------------------------------------------------------------------------------------------------------------------------------------------|---------------------------------------------------------------------------------------------------------------------------------------------------------------------------------------|-----------------------------------------------------------------------------------------------------------------------------------------------------------------------------------------------------------------------------------------------------------------------------------------------------------------------------------------------------------------------------------------------------------------------------|---------------------------------------------------------------------------------|-------------------------------------------------|---------------------------------------------------------------------------------------------------------------------------------------------------------------------------|
| Ministry of Health<br>Hesning P           | A Prospective Multicentre Otolaryngology Database        | 2007 | Prospective Multicentre Otolaryngology Database | Otolaryngology               | There should be international consensus on the content of the proposed database                                                                                        | NS                                                                                                          | Aim of the project is to create an interactive otology database for surgeons in the UK and Europe. The aims of the project are: To identify common otology audit data among clinicians; To provide an information technology system to store otology data for clinicians; To create a large database that allows statistical analysis to be made on various otologic interventions with sufficient power; To produce standards or benchmarks for comparative audit. The web-based system can be a useful learning tool for surgeons because it gives almost real-time feedback to the individual surgeon. This enables clinicians to monitor their own surgical practice against these standards. The Surgical Training Committee can even use it as a tool to implement competency-based training for surgical trainees; The system provides the mechanism for hospitals or clinicians to collaborate in clinical trials using the common data input methodology; The ultimate goal of the proposed project is to provide primary potential research data that is lacking at the moment. | NS | There should be international consensus on the content of the proposed database. The system must be user-friendly, both in data input and retrieval. A working party of international otologists from 11 countries has already agreed on the content of a common ear database. Web-based and prospective. Piloting the registry is useful for user feedback. | NS                                                                                                                                                                                                                                                                                                                                                                                                                                                                                                                          | BMJ Open                                                                                                                                                                                                                                                                                | Patient details, proposed operation date, pre-operative symptoms, aim of surgery, risk factors, audiogram results, operative findings, operative details (approach, materials used), complications, pathology results, audiogram, follow up intervals, main outcomes, free text for comments. Two levels of data entry are available: Level 1 (a minimum otology database); This is designed for general otolaryngologists and surgical trainees. Only main surgical outcomes are recorded. Level 2 (a comprehensive database): This is designed for dedicated otologists. Detailed information on pathologies, risk factors, and surgical procedure are recorded. | Data used as a benchmark or 'standards' are validated. The methodology requires surgeons to put in pre-operative data on all patients scheduled for ear surgery, thus eliminating bias from selective reporting of operations. Validation of data can be done by site visit of each hospital by an external inspector/auditor (another user of the web-based system) to perform random inspection of patient records. The benefit of using peers to validate data from each centre gives a further opportunity for clinicians to learn from each other. | The system must be user-friendly, both in data input and retrieval. The use of the database should not be exclusive to a few selected otologists. Every field on the data form needs to be completed before the form is accepted, thus ensuring completeness of data entry. Each surgeon can download his surgical results from the website into an Excel file in almost real time                           | NS                                                                                                               | The identity of surgeon and patient must remain anonymous; data used as a benchmark or 'standards' are validated                                                                                                                                                                                                                                                                                                   | NS                                                                                                                                                                                    | NS                                                                                                                                                                                                                                                                                                                                                                                                                          | To help facilitate comparisons and establish standards. To facilitate research. | Help generate data quickly for clinical trials. | The identity of surgeon and patient must remain anonymous. Each surgeon is allocated an access code and a password. Data will be owned by all the members who contributed |
| Health and Social Care Information Centre | National Head and Neck Cancer Audit, Tenth annual report | 2014 | National Head and Neck Cancer Audit             | Head and Neck Cancer surgery | The Healthcare Quality Improvement Partnership (HQIP), Health and Social Care Information Centre (HSCIC), The British Association of Head and Neck Oncologists (BAHNO) | The professional body overseeing the Audit was the British Association of Head and Neck Oncologists (BAHNO) | The aim of the Audit is to improve quality of care to those patients with head and neck cancer by raising standards of care to match those of the best performing teams.                                                                                                                                                                                                                                                                                                                                                                                                                                                                                                                                                                                                                                                                                                                                                                                                                                                                                                                  | NS | The Audit was commissioned by the Healthcare Quality Improvement Partnership (HQIP) and funded by NHS England and the Welsh Government.                                                                                                                                                                                                                      | Measures for cancer outcomes have been drawn from the National Institute for Health and Care Excellence (NICE) published guidance on head and neck cancer - this facilitates comparison of practice to national guidance. The Patient Concerns Inventory (PCI) is a tool that helps patients more effectively voice concerns during their follow up, with the aim of better holistic care. For the first time the Audit has collected information on the patient's experience of care and in future better understanding of | Patient demographics, Patient Concerns Inventory, mortality, treatment received, four year survival, speech and language assessment, time to treatment, Human Papilloma Virus (HPV) status. Whether HPV was tested. Whether there was an MDT discussion. Length of stay. Complications. | Analysis was performed by the HSCIC analysis team, and interpretation of data was facilitated by an Expert Panel of head and neck professionals. It is useful to supplement and link audit data with external data sets such as HES to increase accuracy. Casemix adjusted mortality ratios provide a more meaningful way to compare outcomes between cancer networks. This allows networks to be scored as to whether the results are outside expected levels. Combination of                                                                                                                                                                                     | Publicising the registry. Having a restricted data set has led to higher levels of data completeness - it is important to have for focused and targeted questioning. It is important to provide staff with adequate support and resources to submit data.                                                                                                                                                                                                                                                                                               | The Head and Neck Cancer Audit database contains information on more than 54,000 head and neck cancer cases, with 7,700 cases of the glottic larynx, and more than 7,500 cases of oral tongue cancer. Only a small percentage of patients completed the PCI. Trust participation in the tenth Annual Report is estimated at 96 per cent. 86.0 per cent of the patients' treatment recorded; 86.3 per cent in | The report was produced by the National Head and Neck Cancer Audit Project Team under the auspices of the HSCIC. | Patients concerns inventory (PCI) This is a tool that helps patients more effectively voice concerns during their follow up, with the aim of better holistic care. This is the first time the Audit has collected information on the use of this tool. In this data period only a small percentage of patients completed the PCI, but by publicising it more widely we would hope to see greater uptake in future. | Difficult to get data completion on patient concerns inventory. Difficult to supplement/link the audit data with other data sets like HES which would help make the data more robust. | Helps identify national variation in services. Enables you to check whether guidelines are being met. Enables comparisons of practice between centres, helps inform patients about their disease and potential outcomes. The registry data can also be used to answer questions where existing evidence is lacking. Registry data can also help you map and evaluate the patient pathway. Helps commissioners and providers | NS                                                                              | NS                                              |                                                                                                                                                                           |

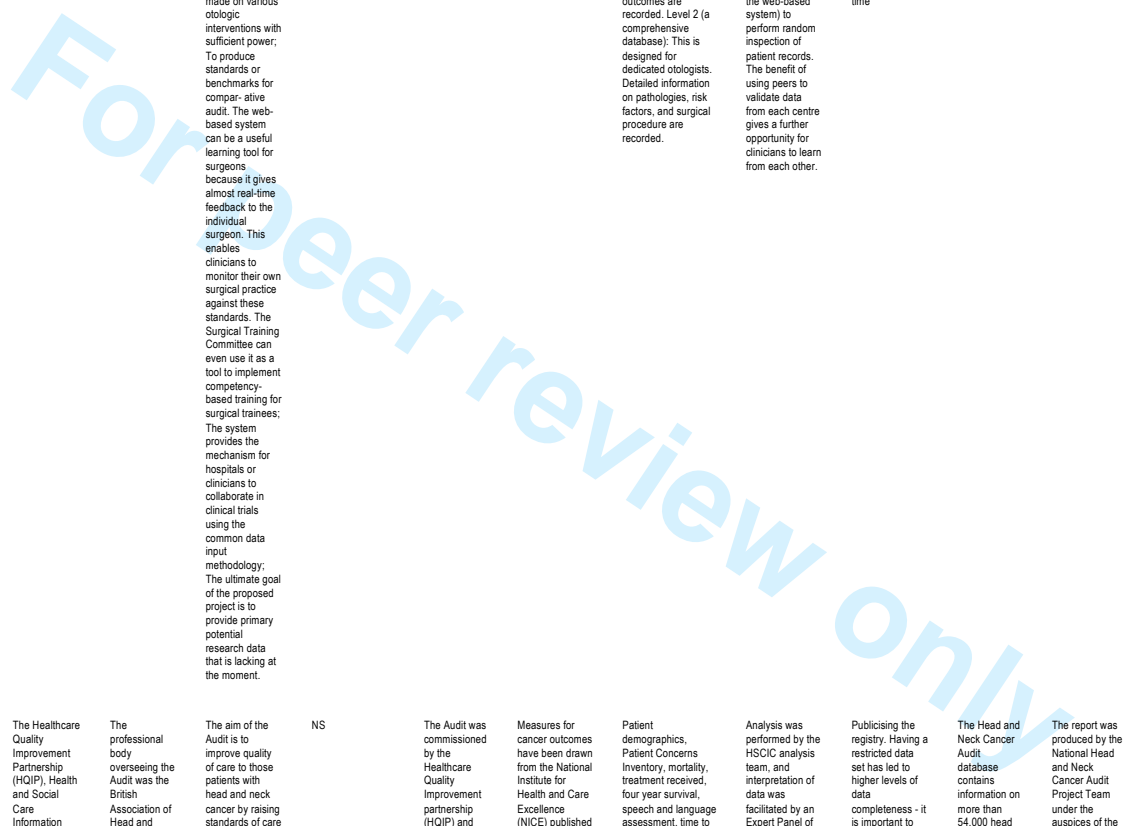

different data sources is both feasible and has led to significant added value

England and 82.1 per cent in Wales.

of care reflect on their performance and develop actions to improve. Helps improve standards of care. Facilitates research. Enables monitoring of NHS standards of care and supports service reorganisation and appropriate commissioning.

help direct appropriate support for patients and their carers.

|                                                   |                                                                                          |      |                                     |                   |                                                                                                                                                                                                                |                                                                                            |                                                                                                                                                                                                                                                                            |                                                                                                                                                                                                                               |                                                                                              |                                                                                                                                           |                                                                                                                                                                                                                                          |                                                                                                                                                                                                                                                                    |                                                                                                                                                                                                                                                                    |                                                                                      |                                                                                                 |    |                                                                                                                                                                                                          |                                                                                                                                                                                                                                                                                                                                                                                                                                                                                                                                                                                                                                                                              |    |                                                                                                                                                                                                                                                                                                                                                                                                                                                                                                                                                              |
|---------------------------------------------------|------------------------------------------------------------------------------------------|------|-------------------------------------|-------------------|----------------------------------------------------------------------------------------------------------------------------------------------------------------------------------------------------------------|--------------------------------------------------------------------------------------------|----------------------------------------------------------------------------------------------------------------------------------------------------------------------------------------------------------------------------------------------------------------------------|-------------------------------------------------------------------------------------------------------------------------------------------------------------------------------------------------------------------------------|----------------------------------------------------------------------------------------------|-------------------------------------------------------------------------------------------------------------------------------------------|------------------------------------------------------------------------------------------------------------------------------------------------------------------------------------------------------------------------------------------|--------------------------------------------------------------------------------------------------------------------------------------------------------------------------------------------------------------------------------------------------------------------|--------------------------------------------------------------------------------------------------------------------------------------------------------------------------------------------------------------------------------------------------------------------|--------------------------------------------------------------------------------------|-------------------------------------------------------------------------------------------------|----|----------------------------------------------------------------------------------------------------------------------------------------------------------------------------------------------------------|------------------------------------------------------------------------------------------------------------------------------------------------------------------------------------------------------------------------------------------------------------------------------------------------------------------------------------------------------------------------------------------------------------------------------------------------------------------------------------------------------------------------------------------------------------------------------------------------------------------------------------------------------------------------------|----|--------------------------------------------------------------------------------------------------------------------------------------------------------------------------------------------------------------------------------------------------------------------------------------------------------------------------------------------------------------------------------------------------------------------------------------------------------------------------------------------------------------------------------------------------------------|
| Hopkins J<br>Welbourn R                           | The importance of national registries/databases in metabolic surgery: the UK experience. | 2016 | National Bariatric Surgery Registry | Bariatric surgery | British Obesity and Metabolic Surgery Society, the Association of Laparoscopic Surgeons of Great Britain & Ireland, and the Association of Upper Gastro-intestinal Surgeons, Dendrite Clinical Systems Limited | NS                                                                                         | The aim of this paper was to present the baseline patient characteristics, type 2 diabetes outcomes, and main operation results from January 2009 to December 2013, incorporating the data from the first 2 book reports, and compare them with other national registries. | The NBSR is a web-based application developed to collect prospective data for all bariatric surgery patients in the UK and Ireland.                                                                                           | Seed funding provided by the Association of Laparoscopic Surgeons of Great Britain & Ireland | NS                                                                                                                                        | Patient demographics, comorbidities, primary or revision surgery, type of surgery, funding of surgery, BMI, diabetic status, post of complications, date of discharge, destination of discharge, mortality, cause of death, weight loss. | Data are typically collected and submitted during routine clinical visits pre and postoperatively. To provide external validation, the NBSR also analysed NHS administrative data that is independently collected. As a cross check, data were compared to the ONS | Minimise the dataset, be selective with data collection fields. In April 2012, the NBSR became mandatory for NHS provider units. Data completeness in the NBSR has improved to over 90% since it became mandatory. Promote a culture of submitting data routinely. | Produced outcomes reports in more than 25,328 patients. Data completion of over 90%. | The registry had individual consultant surgeon mortality data published for the years 2012–2014 | NS | One of the biggest challenges of any registry is collecting long term outcomes. Another key challenge is agreeing on core outcome sets and trying to make this compatible with international registries. | Registries provide commissioners and decision makers with robust and real world data that help them make decisions. Registries can influence policy; the NBSR has influenced NICE guidance. Helps drive quality improvement. Registries improve the profile and acceptance of metabolic surgery amongst payors and commissioners. Registries can indicate which patients have the greatest likelihood of success from the operation, which is important in the NHS, where rates of surgery are rationed to a fraction of those deemed eligible by national guidelines. Can help identify variations in practice within the UK but also between different healthcare systems. | NS | Access is via a unique password-protected ID for registered surgeons and their named delegates. Each user sees only their own data and access to the database as a whole is restricted to system administrators, with data release controlled by a database committee. Patient data are anonymised to comply with the UK Data Protection Act 1998, with a unique ID number allocated to each patient at the point of initial data entry. In the published NBSR reports, only aggregated data are reported without identifying any patient, surgeon, or unit. |
| National Institute for Health and Care Excellence | Interventional procedures programme manual. Section 12.3                                 | 2016 | NS                                  | NS                | NS                                                                                                                                                                                                             | Independent steering group should be responsible for design, data monitoring and analysis. | This section provides NICE standards and criteria for recommending a register in Interventional Procedures guidance                                                                                                                                                        | The register should be recorded on national database of registers. Medicines and Healthcare products Regulatory Agency/NICE and professional representatives should be involved in dataset design and agree the final design. | NS                                                                                           | In their guidance documents, NICE specifies the outcomes that are most needed. This can be looked at when developing a national registry. | All known procedures (all devices), without exception, are recorded in the database. Efficacy and safety outcomes and important patient characteristics.                                                                                 | Process for data collection, storage and analysis independent of any particular company or any commercial interest.                                                                                                                                                | NS                                                                                                                                                                                                                                                                 | NS                                                                                   | There should be explicit intent to publish results whatever the outcome.                        | NS | NS                                                                                                                                                                                                       | When data on efficacy or safety are inadequate in quality or quantity, registry data can enable NICE to review and update their guidance. Registries are useful for providing efficacy and safety data. Registries also encourage audit of outcomes.                                                                                                                                                                                                                                                                                                                                                                                                                         | NS | Data should be anonymised. The Registry must comply with the data protection principles laid out in the UK Data Protection Act 1998 and any other relevant legislation. The data should be used fairly, for specific purposes, the data should not be kept for longer than is necessary, the data should be kept safe and secure, and not transferred outside the European Economic Area without                                                                                                                                                             |

1  
2  
3  
4  
5  
6  
7  
8  
9  
10  
11  
12  
13  
14  
15  
16  
17  
18  
19  
20  
21  
22  
23  
24  
25  
26  
27  
28  
29  
30  
31  
32  
33  
34  
35  
36  
37  
38  
39  
40  
41  
42  
43  
44  
45  
46  
47

1  
2  
3  
4  
5  
6  
7  
8  
9  
10  
11  
12  
13  
14  
15  
16  
17  
18  
19  
20  
21  
22  
23  
24  
25  
26  
27  
28  
29  
30  
31  
32  
33  
34  
35  
36  
37  
38  
39  
40  
41  
42  
43  
44  
45  
46  
47

|                                          |                                                                                         |      |                                                     |                           |    |                                                         |                                                                                                                                                                                         |                                                                                                                                                      |                                                              |                                                                                                                                                         |                                                                                                                                                                                  |                                                                                                                                                                                                                                                                                                                                                   |                                                                                                                                                                                                                                                 |                                                                                                                                      |    |    |    |                                                                                                                                                                                             |                                                                                                                                                                                                                                                                                                                                                                          |    |                                                                            |
|------------------------------------------|-----------------------------------------------------------------------------------------|------|-----------------------------------------------------|---------------------------|----|---------------------------------------------------------|-----------------------------------------------------------------------------------------------------------------------------------------------------------------------------------------|------------------------------------------------------------------------------------------------------------------------------------------------------|--------------------------------------------------------------|---------------------------------------------------------------------------------------------------------------------------------------------------------|----------------------------------------------------------------------------------------------------------------------------------------------------------------------------------|---------------------------------------------------------------------------------------------------------------------------------------------------------------------------------------------------------------------------------------------------------------------------------------------------------------------------------------------------|-------------------------------------------------------------------------------------------------------------------------------------------------------------------------------------------------------------------------------------------------|--------------------------------------------------------------------------------------------------------------------------------------|----|----|----|---------------------------------------------------------------------------------------------------------------------------------------------------------------------------------------------|--------------------------------------------------------------------------------------------------------------------------------------------------------------------------------------------------------------------------------------------------------------------------------------------------------------------------------------------------------------------------|----|----------------------------------------------------------------------------|
| PELICAN                                  | LOREC APE Perineal Wound Registry                                                       | 2016 | NS                                                  | Abdominoperineal excision | NS | Steering committee. The registry is maintained by LOREC | The objective is to find out which aspects of each procedure (for abdomino perineal excision) are most successful for patients in terms of complication free wound closure and healing. | Online registry hosted on LOREC website.                                                                                                             | NS                                                           | NS                                                                                                                                                      | NS                                                                                                                                                                               | NS                                                                                                                                                                                                                                                                                                                                                | NS                                                                                                                                                                                                                                              | NS                                                                                                                                   | NS | NS | NS | NS                                                                                                                                                                                          | Provides data on current practice and outcomes.                                                                                                                                                                                                                                                                                                                          | NS | There is a data custodian. The registry leads have access to all the data. |
| Uberoi R. Milburn S. Moss Jon. Gaines P. | British Society of Interventional Radiology Iliac Artery Angioplasty-Stent Registry III | 2009 | BSIR Iliac Artery Angioplasty-Stent (BIAS) registry | Iliac artery intervention | NS | NS                                                      | Setting standards of practice for interventional radiologists carrying out iliac interventional procedures                                                                              | Based on a previous BIAS registry. Access to the registries could be obtained either through the BSIR Web site or directly at the Dendrite Web site. | The registry is funded by the BSIR on behalf of its members. | Based on a previous BIAS, the data sets were modified so that the number of data collected from each procedure was reduced and free text was minimised. | Type of intervention, patient demographics, comorbidities, day-case or inpatient, level of clinician, indication, elective/emergency, procedure details, outcome, complications. | Data were collected and analyzed by Dendrite Clinical Systems                                                                                                                                                                                                                                                                                     | Minimise the dataset and amount of free text. Online collection of data. Increase pressure for clinicians to self-audit. External motivation in the form of regular feedback, newsletters, and follow up e-mails requires funding and staff.    | Over a 43-month period (2005 to 2008) 37 institutions submitted data for 2233 patients. This brings the total BIAS database to 4295. | NS | NS | NS | It is challenging to achieve good rates of data completion. This is likely due to lack of time and motivation. It is also difficult to capture long term follow up data. Limited resources. | Provide a structured format for collecting data. Allow comparison of an individual's performance with that of others, highlighting areas which are done well and those in need of improvement. Enables assessment of trends in practice. Enables individuals to carry out regular audits and comply with local and national requirements for appraisal and revalidation. | NS | NS                                                                         |
| Goode SD. Cleveland T.J. Gaines PA       | United Kingdom Carotid Artery Stent Registry: Short- and Long-Term Outcomes             | 2013 | UK CAS Registry                                     | Carotid artery stenting   | NS | NS                                                      | To monitor the practice of CAS with the aims of gathering short and long-term data to better inform our practice.                                                                       | Set up by BSIR. Voluntary registry open to all UK hospitals.                                                                                         | NS                                                           | NS                                                                                                                                                      | Demographics, comorbidities, indications, location of disease, procedure information, 30-day outcomes, complications.                                                            | Data were self-reported and collated by a clinician entering data into the registry. A follow-up form was sent to each centre on an annual basis. Centres that had not returned follow-up forms were sent another form and followed-up by a telephone call. All data were entered onto a clinical database provided by Dendrite Clinical Systems. | Data entry into the registry was encouraged by the publication of the National Institute of Clinical Excellence (NICE) guidance, which advised that data of all patients undergoing CAS should be entered into UK CAS registry held by the BSIR | NS                                                                                                                                   | NS | NS | NS | Enables monitoring of practices.                                                                                                                                                            | NS                                                                                                                                                                                                                                                                                                                                                                       | NS |                                                                            |

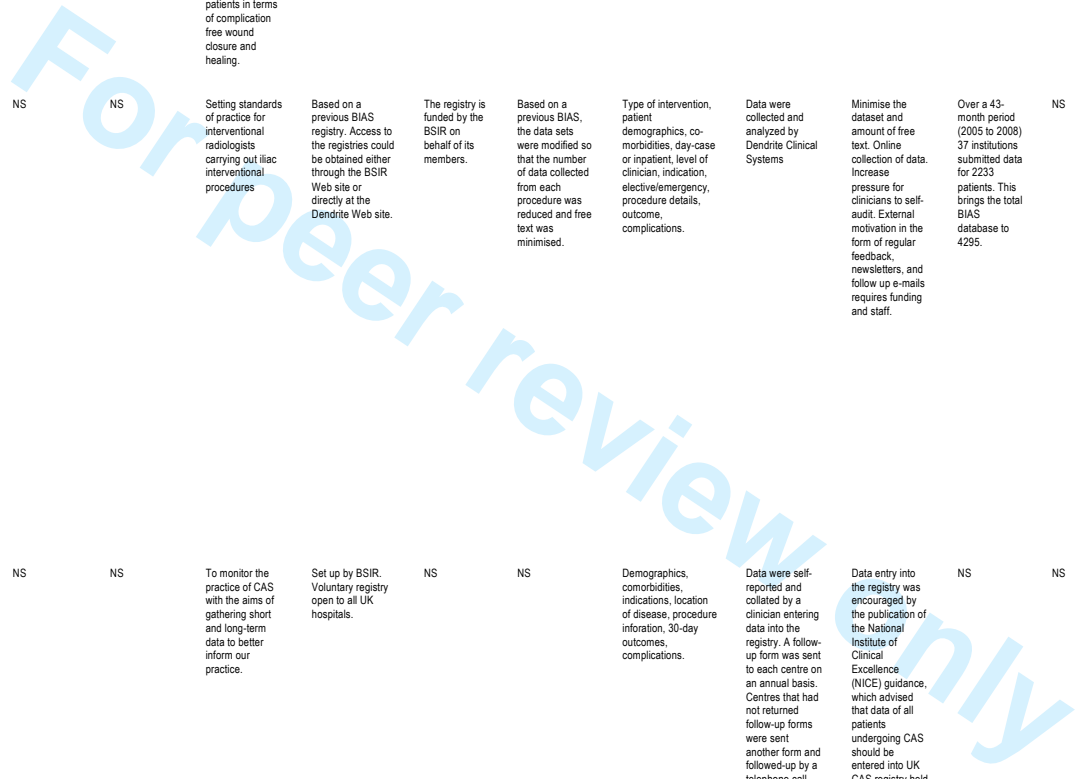
