# Supplementary material for: What are the essential features of a successful surgical registry? a systematic review
Source: PubMed Central journal article supplement — BMJ Open. 2017 Sep 24;7(9):e017373. doi: 10.1136/bmjopen-2017-017373 (PMC5623553; doi:10.1136/bmjopen-2017-017373), 2017-09-24
Supplement: bmjopen-2017-017373supp001.pdf [file bmjopen-2017-017373supp001.pdf]

## Appendix 1

Ovid Medline and Embase search strategy:

1. (britain\$ OR "united kingdom\$" OR uk or england\$ OR northern ireland\$ OR wales\$ OR scotland\$).mp. [mp=ti, ab, hw, tn, ot, dm, mf, dv, kw, fx, nm, kf, px, rx, an, ui, sy]
  
2. (surgery OR surgical).mp. [mp=ti, ab, hw, tn, ot, dm, mf, dv, kw, fx, nm, kf, px, rx, an, ui, sy]
  
3. (register OR registers OR registry OR registries).mp. [mp=ti, ab, hw, tn, ot, dm, mf, dv, kw, fx, nm, kf, px, rx, an, ui, sy]
  
4. 1 AND 2 AND 3
